# Supplementary material for: GeneCompete: an integrative tool of a novel union algorithm with various ranking techniques for multiple gene expression data
Source: PeerJ journal article supplement (doi:10.7717/peerj-cs.1686), 2023-11-15

# Classic

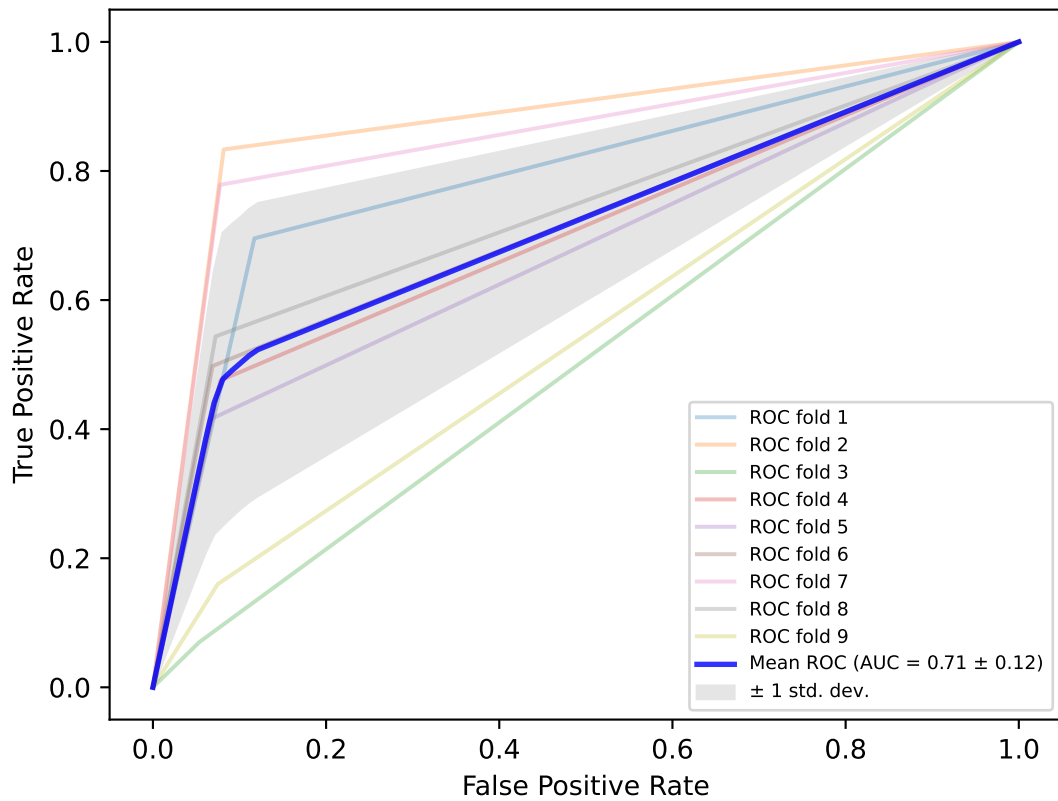

# Count

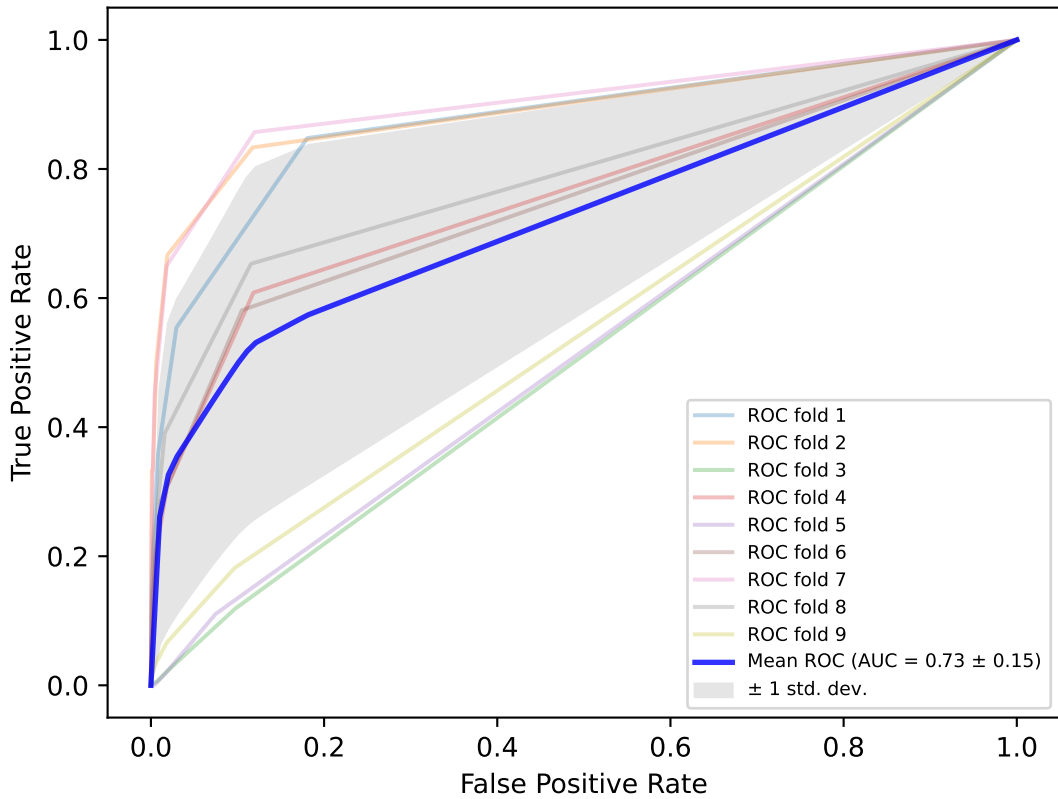

# Win-loss

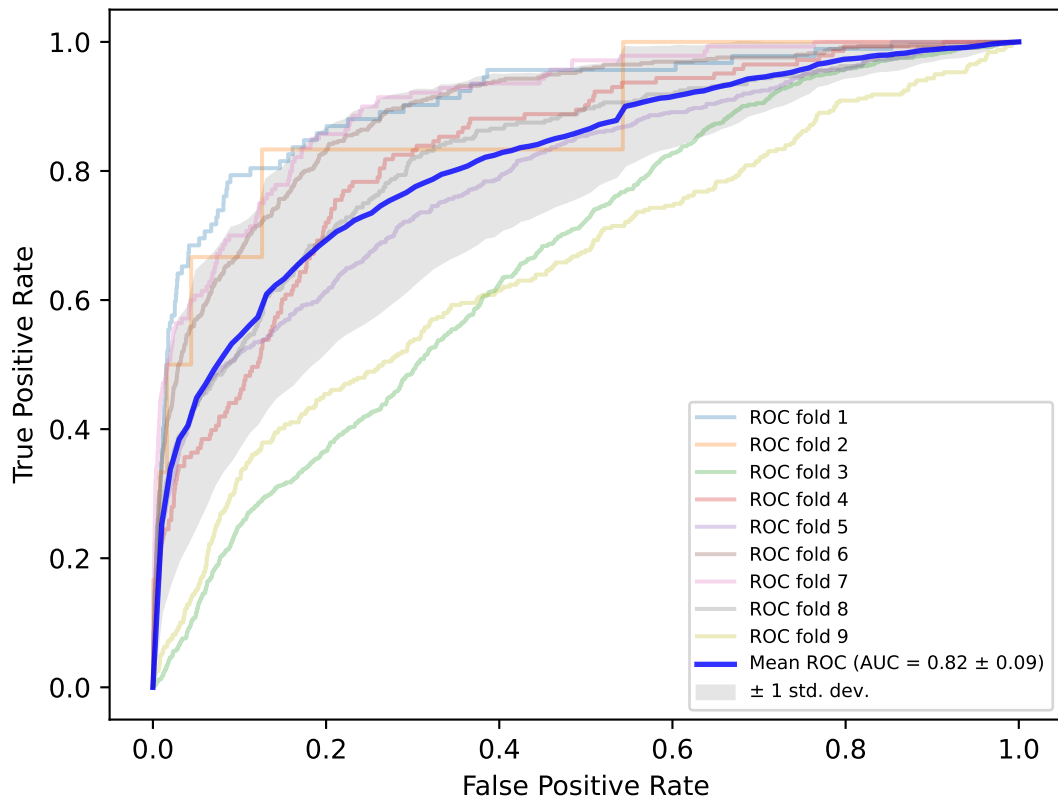

# Massey

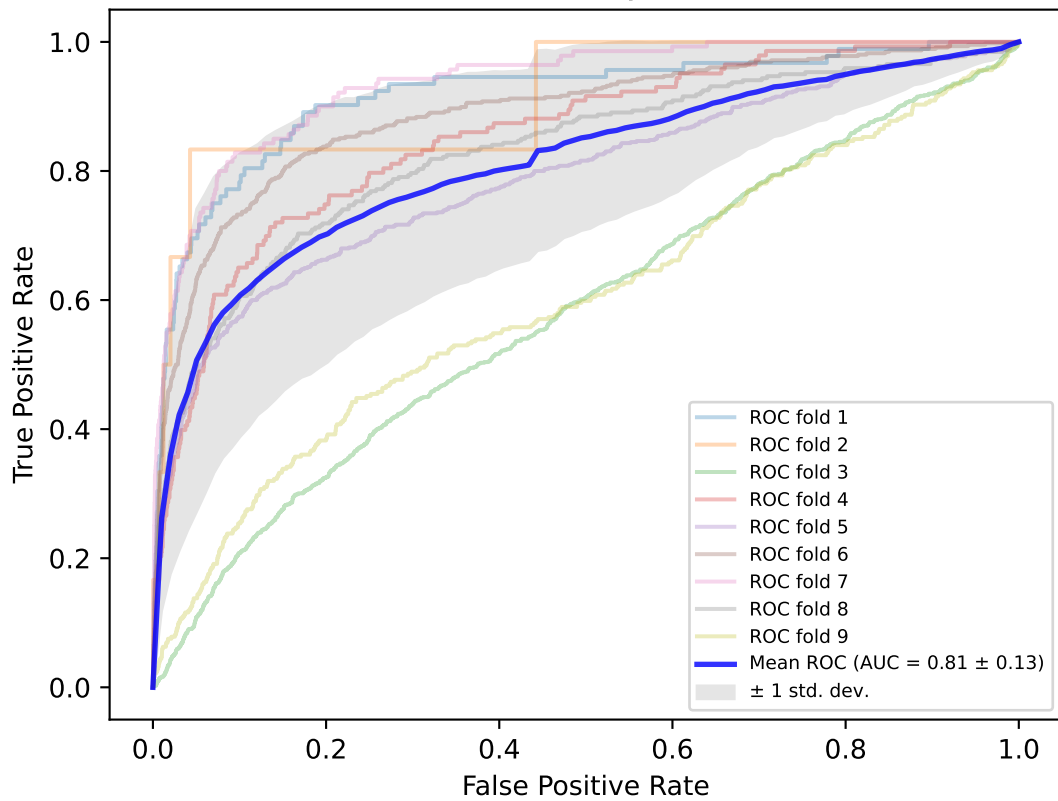

# Colley

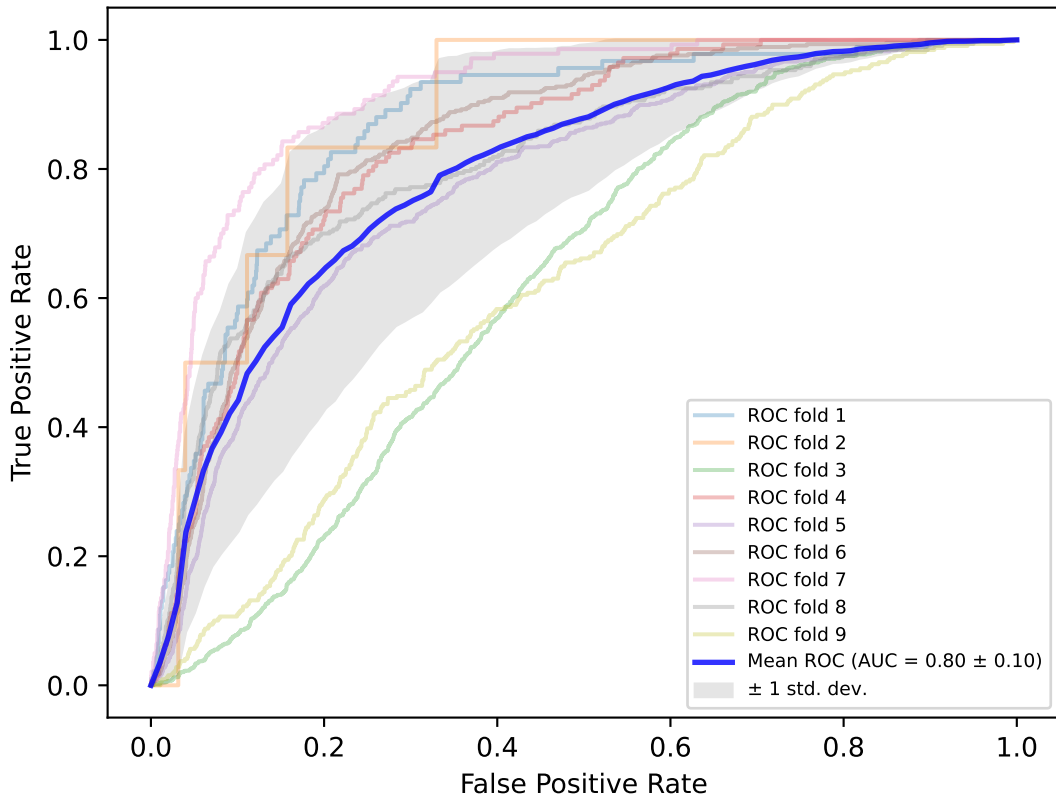

# Keener

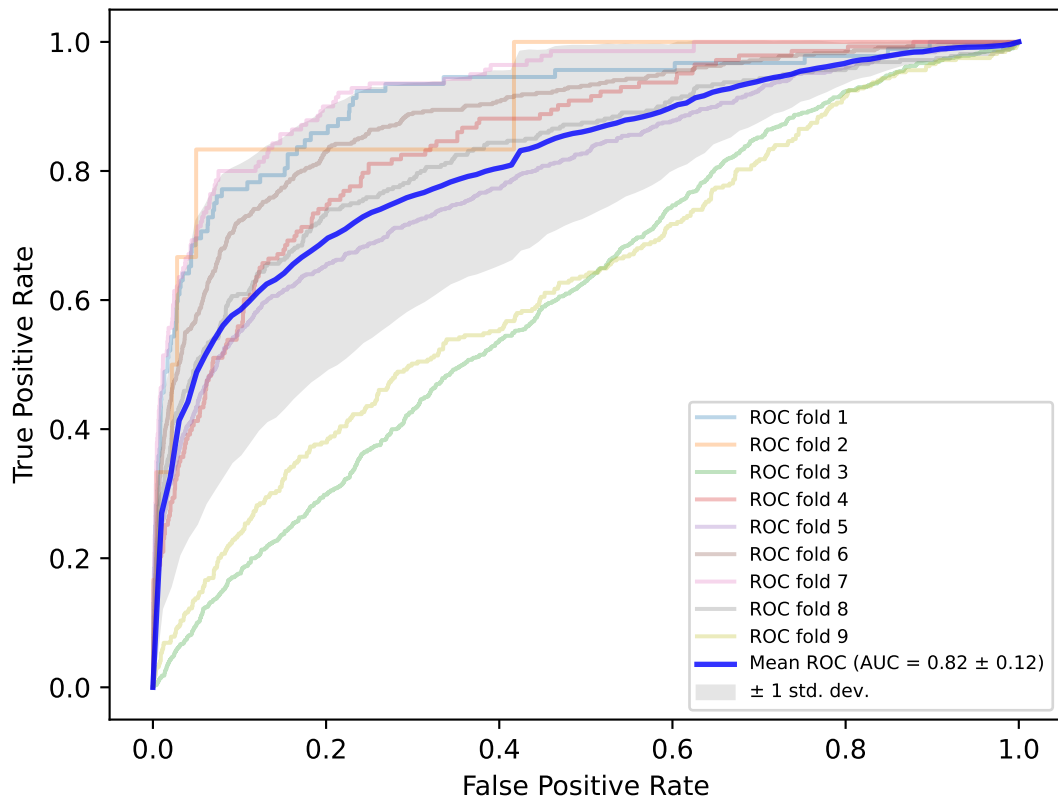

# Elo

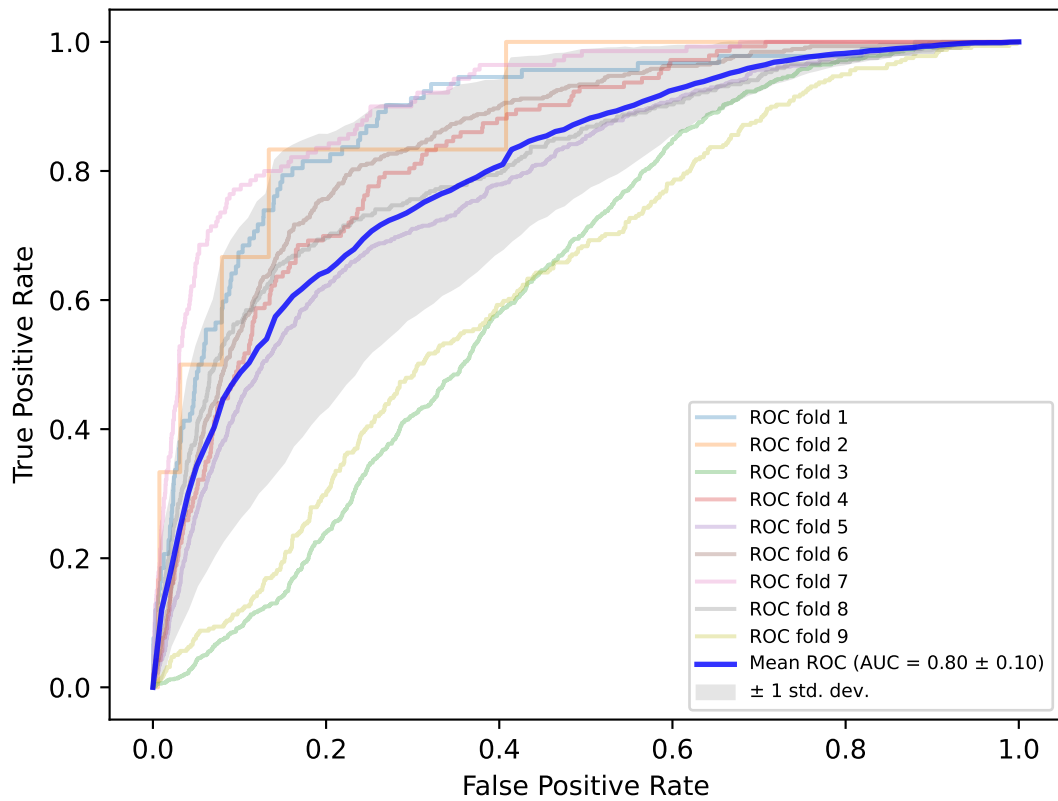

# Markov

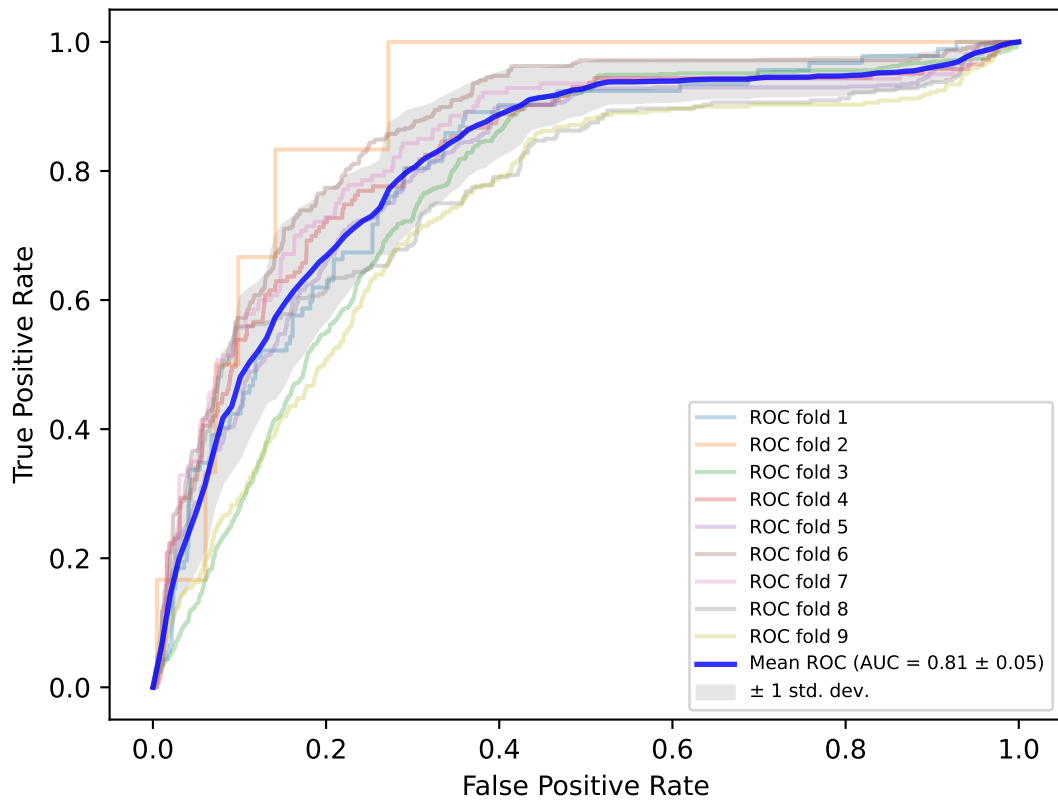



# PageRank

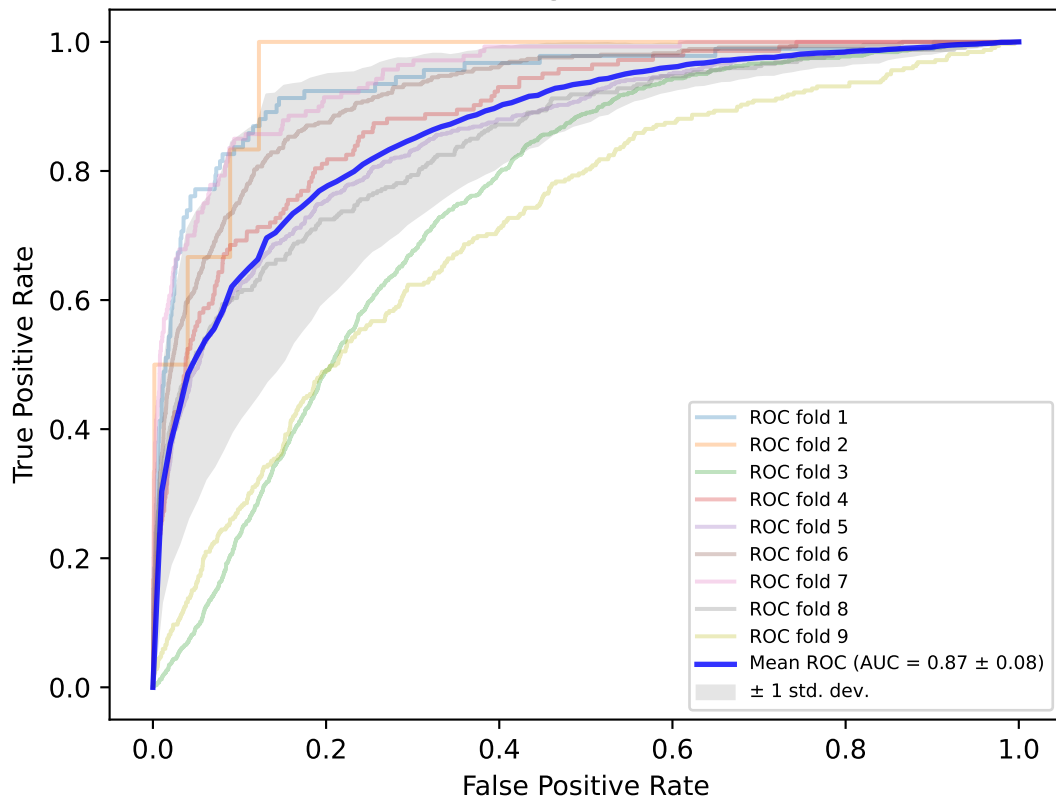

# BiPageRank

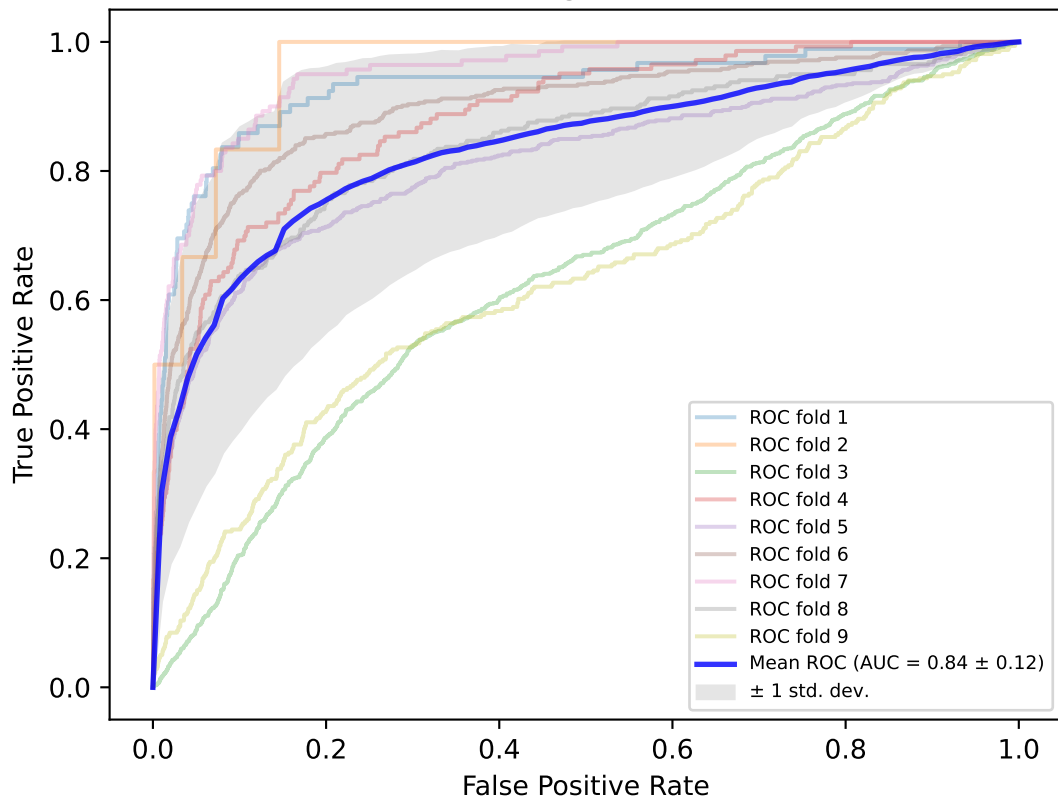

Supplement: Data_S3.pdf [file Data_S3.pdf]
