# Supplementary material for: GeneCompete: an integrative tool of a novel union algorithm with various ranking techniques for multiple gene expression data
Source: PeerJ Comput Sci. 2023 Nov 15;9:e1686. doi: 10.7717/peerj-cs.1686 (PMC10703088; doi:10.7717/peerj-cs.1686)
Supplement: Supplemental Information 1 [file peerj-cs-09-1686-s001.docx]

**Data S1** The derivation of Colley’s rating

Let *ri* be the Colley’s rating.

First, the winning percentage based on Laplacian’s rule is defined by .

Since all teams begin with *rk*=1/2, then the number of times player *i* win can be written as

where *Oi* is the set of opponents of player *i*.

After substitute Wi,

Then, multiplying by Ni+2,

Next, is subtracted from both sides of equation to obtain,

Finally, *Cr=b* is obtained.
