# Supplementary material for: GeneCompete: an integrative tool of a novel union algorithm with various ranking techniques for multiple gene expression data
Source: PeerJ Comput Sci. 2023 Nov 15;9:e1686. doi: 10.7717/peerj-cs.1686 (PMC10703088; doi:10.7717/peerj-cs.1686)
Supplement: Supplemental Information 15 [file peerj-cs-09-1686-s015.xlsx]

## Sheet: Win-loss
	pathway	pval	padj	log2err	ES	NES	size	leadingEdge
1	ANATOMICAL STRUCTURE MORPHOGENESIS%GO%GO:0009653	1.14771e-26	3.40527e-23	1.34223	0.348191	2.95496	472	c("SFRP4", "ST8SIA2", "FRZB", "COMP", "HTR2B", "FZD2", "PROM1", "FREM1", "ANTXR1", "SOX4", "EPHA3", "THY1", "NTNG2", "COL9A1", "BMP4", "DPYSL3", "FARP1", "CPE", "CC2D2A", "IER3", "MYOZ1", "AGRN", "ENAM", "LEF1", "MYOC", "EVC", "ENAH", "NOX4", "PAK1", "HFE2", "TGFB2", "CHN1", "CNTN4", "APLP1", "COL9A2", "SH3GL2", "FOXS1", "TGFB3", "AFF3", "LFNG", "GLI1", "FGF1", "MYH11", "COL13A1", "FGF18", "SCG2"…
2	EXTRACELLULAR REGION PART%GO%GO:0044421	1.20725e-22	1.44e-19	1.2295	0.400493	3.20655	265	c("SFRP4", "THBS4", "FMOD", "AEBP1", "FAP", "FRZB", "CTHRC1", "COMP", "POSTN", "KIT", "SERPINE2", "SNCA", "OGN", "COL14A1", "CFH", "SULF1", "CPXM2", "COL16A1", "ECM2", "MFAP4", "ENPP2", "PTN", "IGFBP5", "LUM", "SFRP1", "COL9A1", "EDIL3", "BMP4", "DPYSL3", "HTRA1", "PODN", "DKK2", "SCRG1", "APOE", "AGRN", "CRHBP", "ENAM", "ABI3BP", "ACE2", "IGFBP3", "MYOC", "MMP28", "APLP1", "HBEGF", "COL9A2", "DP…
3	EXTRACELLULAR REGION%GO%GO:0005576	1.45601e-22	1.44e-19	1.2295	0.347285	2.91346	418	c("SFRP4", "THBS4", "FMOD", "AEBP1", "FAP", "FRZB", "CTHRC1", "COMP", "POSTN", "KIT", "SERPINE2", "SNCA", "OGN", "COL14A1", "PENK", "PROS1", "CFH", "F2RL2", "SULF1", "CPXM2", "COL16A1", "ECM2", "COL10A1", "MFAP4", "ENPP2", "PTN", "IGFBP5", "LUM", "SFRP1", "COL9A1", "EDIL3", "TIMP2", "BMP4", "DPYSL3", "HTRA1", "OMD", "PODN", "TFF3", "DKK2", "SCRG1", "APOE", "PDGFD", "COL21A1", "AGRN", "CRHBP", "EN…
4	ORGAN DEVELOPMENT%GO%GO:0048513	2.35752e-20	1.53769e-17	1.16907	0.320615	2.7152	461	c("SFRP4", "AEBP1", "FRZB", "COMP", "HTR2B", "FZD2", "PLCE1", "PROM1", "KIT", "FREM1", "MME", "SOX4", "SULF1", "THY1", "MDK", "SFRP1", "COL9A1", "JAK2", "BMP4", "CPE", "MYL1", "ENAM", "SGCE", "LEF1", "EVC", "TGFB2", "CTF1", "CNTN4", "HDAC9", "APLP1", "HBEGF", "NTRK2", "FOXS1", "TGFB3", "LFNG", "GLI1", "FGF1", "MYH11", "COL13A1", "ACE", "RAB23", "COL1A2", "MSTN", "DIXDC1", "PCSK5", "RSAD2", "CRIP1…
5	NERVOUS SYSTEM DEVELOPMENT%GO%GO:0007399	2.59132e-20	1.53769e-17	1.16907	0.316791	2.68936	473	c("SFRP4", "ST8SIA2", "FRZB", "FZD2", "PROM1", "SERPINE2", "SOX4", "SULF1", "EPHA3", "MBP", "THY1", "NTNG2", "PTN", "MDK", "SFRP1", "COL9A1", "BMP4", "DPYSL3", "FARP1", "SCRG1", "ALDH1A2", "APOE", "SERPINI1", "AGRN", "BDNF", "TCF4", "LEF1", "NRXN2", "ENAH", "PAK1", "HFE2", "TGFB2", "CHN1", "CTF1", "CNTN4", "APLP1", "CHRNA3", "COL9A2", "NTRK2", "SH3GL2", "GLRB", "MYH11", "SCN3B", "ADAM22", "ZEB1",…
6	SYSTEM PROCESS%GO%GO:0003008	6.6929e-18	3.30964e-15	1.09593	0.314204	2.64242	435	c("TNNT1", "KCNA5", "GRIA3", "HTR2B", "PROM1", "KIT", "SNCA", "NPR3", "MME", "SLC26A4", "SULF1", "MBP", "EDNRA", "TNNT3", "SCN2B", "KCNN3", "MEOX2", "SLC6A1", "APOE", "MYL1", "AGRN", "AP3M2", "CRHBP", "GRM1", "ACE2", "BDNF", "KCNMB1", "DRD4", "AMPH", "NPPA", "KCNE1", "CRYM", "KCNMA1", "GNB3", "SNTB1", "CHRNA3", "NTRK2", "FOXS1", "GUCA1C", "DDAH1", "GLRB", "GABRB1", "KCNS3", "MYH11", "ABCC8", "ACE…
7	REGULATION OF PHOSPHATE METABOLIC PROCESS%GO%GO:0019220	1.22006e-17	5.1713e-15	1.08644	0.317451	2.6555	407	c("THBS4", "HTR2B", "FZD2", "PLCE1", "KIT", "SNCA", "EPHA3", "THY1", "SYTL2", "CCND1", "SFRP1", "EDNRA", "PIK3IP1", "TNNT3", "JAK2", "BMP4", "UCHL1", "FARP1", "MDFIC", "RGS4", "APOE", "STK38L", "AGRN", "MYO1D", "IGFBP3", "DRD4", "PAK1", "TGFB2", "HERC5", "APLP1", "RGS11", "CHRNA3", "NTRK2", "TGFB3", "GADD45A", "CCND2", "RGS5", "TPD52L1", "RABGAP1L", "PKD2", "NET1", "PIK3R1", "KDELR3", "SIPA1L1", …
8	EXTRACELLULAR SPACE%GO%GO:0005615	4.34751e-17	1.61238e-14	1.06721	0.399108	3.05711	191	c("SFRP4", "THBS4", "FMOD", "AEBP1", "FAP", "FRZB", "CTHRC1", "COMP", "KIT", "SERPINE2", "OGN", "COL14A1", "CFH", "SULF1", "CPXM2", "ENPP2", "PTN", "IGFBP5", "LUM", "SFRP1", "BMP4", "DPYSL3", "HTRA1", "PODN", "DKK2", "SCRG1", "APOE", "CRHBP", "ABI3BP", "ACE2", "IGFBP3", "MYOC", "HBEGF", "DPT", "FGF1", "LTBP4", "ACE", "FGF18", "SCG2", "COL1A2", "CILP", "APOA1", "SOD3", "MASP1", "ANGPTL1", "PCSK5",…
9	CYTOSKELETON%GO%GO:0005856	8.55117e-17	2.68785e-14	1.05746	0.299375	2.54297	478	c("TNNT1", "SNCA", "PLEKHH2", "TNNT3", "DPYSL3", "PHLDB2", "MYL1", "STK38L", "CRHBP", "MAP1A", "EVC", "AMPH", "PAK1", "FSCN1", "BFSP1", "CHRNA3", "HSD17B14", "MAP6", "BRSK1", "IQGAP2", "MYL7", "TTC8", "TPM3", "MYH10", "SORBS2", "MAP4", "KLHL4", "NES", "PKD2", "KIF13A", "ANKRD23", "MID1", "APBB3", "CKAP2", "SIPA1L1", "SVIL", "TCEA2", "DNALI1", "WDR62", "LIMA1", "DYNC1LI2", "MAP2", "MCF2", "MYL5", …
10	CELLULAR COMPONENT MORPHOGENESIS%GO%GO:0032989	9.05915e-17	2.68785e-14	1.05746	0.368452	2.93898	255	c("SFRP4", "ST8SIA2", "FRZB", "FZD2", "ANTXR1", "EPHA3", "NTNG2", "COL9A1", "BMP4", "DPYSL3", "FARP1", "CC2D2A", "MYOZ1", "AGRN", "LEF1", "ENAH", "NOX4", "PAK1", "HFE2", "TGFB2", "CHN1", "CNTN4", "COL9A2", "SH3GL2", "FOXS1", "MYH11", "SCN3B", "BRSK1", "COL1A2", "S100A6", "TTC8", "ST8SIA4", "MYH10", "FYN", "UNC5B", "CAPN3", "INTU", "DOCK1", "ANKRD1", "FOXC2", "PTPN11", "EVL", "KAL1", "FZD1", "MAP2…
11	REGULATION OF LOCALIZATION%GO%GO:0032879	1.02444e-16	2.7632e-14	1.05746	0.305182	2.5646	430	c("SFRP4", "THBS4", "KCNA5", "HTR2B", "TMEM30B", "SERPINE2", "SNCA", "SOX4", "SLC26A4", "SULF1", "THY1", "ENPP2", "IGFBP5", "SLC30A2", "TNFRSF4", "SFRP1", "SCN2B", "BMP4", "DPYSL3", "PODN", "MDFIC", "SNCAIP", "SGIP1", "APOE", "CRHBP", "IGFBP3", "LEF1", "DRD4", "KCNE1", "TGFB2", "HDAC9", "XPO4", "HBEGF", "CHRNA3", "TGFB3", "FGF1", "CACNA2D2", "KCNS3", "ABCC8", "ACE", "RAB23", "SCN3B", "SCN4B", "AP…
12	EXTRACELLULAR MATRIX%GO%GO:0031012	1.45649e-16	3.60117e-14	1.04763	0.460089	3.29042	126	c("THBS4", "FMOD", "AEBP1", "HAPLN1", "COMP", "POSTN", "SERPINE2", "SNCA", "OGN", "COL14A1", "CPXM2", "COL16A1", "ECM2", "MFAP4", "LUM", "SFRP1", "COL9A1", "HTRA1", "COL21A1", "AGRN", "ENAM", "ABI3BP", "PLAT", "TGFB2", "MMP28", "APLP1", "COL9A2", "TGFB3", "DPT", "LTBP4", "COL13A1", "COL8A1", "PRELP", "COL1A2", "CILP", "SOD3", "FLRT2", "FBLN2", "MATN2", "LEPREL1", "LAMA2", "COL7A1", "SERPINF1", "C…
13	CELL MORPHOGENESIS%GO%GO:0000902	3.01191e-16	6.87411e-14	1.0377	0.370432	2.92301	240	c("SFRP4", "ST8SIA2", "FRZB", "FZD2", "ANTXR1", "EPHA3", "NTNG2", "COL9A1", "BMP4", "DPYSL3", "FARP1", "CC2D2A", "AGRN", "LEF1", "ENAH", "NOX4", "PAK1", "HFE2", "TGFB2", "CHN1", "CNTN4", "COL9A2", "SH3GL2", "FOXS1", "MYH11", "SCN3B", "BRSK1", "COL1A2", "S100A6", "TTC8", "ST8SIA4", "MYH10", "FYN", "UNC5B", "INTU", "DOCK1", "FOXC2", "PTPN11", "EVL", "KAL1", "FZD1", "MAP2", "DACT2", "SPTBN1", "MYO10…
14	REGULATION OF PHOSPHORUS METABOLIC PROCESS%GO%GO:0051174	3.4203e-16	7.2486e-14	1.0377	0.309996	2.5981	415	c("THBS4", "HTR2B", "FZD2", "PLCE1", "KIT", "SNCA", "EPHA3", "THY1", "SYTL2", "CCND1", "SFRP1", "EDNRA", "PIK3IP1", "TNNT3", "JAK2", "BMP4", "UCHL1", "FARP1", "MDFIC", "RGS4", "APOE", "STK38L", "AGRN", "MYO1D", "IGFBP3", "DRD4", "PAK1", "TGFB2", "HERC5", "APLP1", "RGS11", "CHRNA3", "NTRK2", "TGFB3", "GADD45A", "CCND2", "RGS5", "TPD52L1", "RABGAP1L", "PKD2", "NET1", "PIK3R1", "KDELR3", "SIPA1L1", …
15	REGULATION OF CATALYTIC ACTIVITY%GO%GO:0050790	4.68555e-16	9.26801e-14	1.02767	0.295947	2.50734	463	c("HTR2B", "PLCE1", "KIT", "SERPINE2", "SNCA", "NPR3", "PROS1", "EPHA3", "THY1", "SYTL2", "CCND1", "SFRP1", "EDNRA", "PIK3IP1", "TNNT3", "JAK2", "BMP4", "UCHL1", "PDE1A", "FARP1", "ESR1", "MDFIC", "RGS4", "APOE", "SERPINI1", "STK38L", "AGRN", "MYO1D", "LEF1", "DRD4", "PAK1", "TGFB2", "HERC5", "RGS11", "IFIT1", "CHRNA3", "NTRK2", "GADD45A", "AZIN1", "CCND2", "RGS5", "TPD52L1", "APOA1", "TNFSF10", …
16	CELL PROJECTION MORPHOGENESIS%GO%GO:0048858	4.36396e-15	8.09241e-13	0.996986	0.380773	2.93759	206	c("SFRP4", "ST8SIA2", "FRZB", "FZD2", "EPHA3", "NTNG2", "COL9A1", "DPYSL3", "FARP1", "CC2D2A", "AGRN", "ENAH", "PAK1", "HFE2", "CHN1", "CNTN4", "COL9A2", "SH3GL2", "MYH11", "SCN3B", "BRSK1", "COL1A2", "S100A6", "TTC8", "ST8SIA4", "MYH10", "FYN", "UNC5B", "INTU", "DOCK1", "PTPN11", "EVL", "KAL1", "FZD1", "MAP2", "SPTBN1", "MYO10", "DLG4", "LGI1", "SHANK1", "GSN", "FZD7", "SEMA6A", "FOXD2", "APOD",…
17	POSITIVE REGULATION OF RESPONSE TO STIMULUS%GO%GO:0048584	9.87845e-15	1.72408e-12	0.986546	0.310309	2.56037	360	c("SFRP4", "THBS4", "HTR2B", "PLCE1", "KIT", "CFH", "SOX4", "SULF1", "THY1", "SFRP1", "JAK2", "BMP4", "ESR1", "MDFIC", "SGIP1", "DKK2", "EVC", "DRD4", "ENAH", "PAK1", "TGFB2", "HBEGF", "NTRK2", "TGFB3", "GLI1", "FGF1", "SCG2", "TPD52L1", "COLEC12", "BCL2", "TNFSF10", "MASP1", "DIXDC1", "RSAD2", "FYN", "VEGFC", "KANK1", "PKD2", "PIK3R1", "MID1", "ANKRD1", "FOXC2", "CXCR4", "S100A13", "SULF2", "IL3…
18	REGULATION OF HYDROLASE ACTIVITY%GO%GO:0051336	1.13295e-14	1.86748e-12	0.986546	0.353371	2.80343	247	c("KIT", "SERPINE2", "SNCA", "PROS1", "EPHA3", "THY1", "SYTL2", "SFRP1", "EDNRA", "TNNT3", "JAK2", "PDE1A", "FARP1", "RGS4", "SERPINI1", "AGRN", "MYO1D", "LEF1", "TGFB2", "RGS11", "IFIT1", "NTRK2", "RGS5", "TPD52L1", "APOA1", "TNFSF10", "RABGAP1L", "RECK", "PDE1C", "NET1", "KDELR3", "SIPA1L1", "DOCK1", "ALDH1A1", "PCOLCE2", "SERPINF1", "KIAA1244", "RGS17", "MAP2K5", "PERP", "ALS2CR12", "SOX7", "K…
19	CELL PART MORPHOGENESIS%GO%GO:0032990	1.58321e-14	2.47231e-12	0.975995	0.369549	2.86541	212	c("SFRP4", "ST8SIA2", "FRZB", "FZD2", "EPHA3", "NTNG2", "COL9A1", "DPYSL3", "FARP1", "CC2D2A", "AGRN", "ENAH", "PAK1", "HFE2", "CHN1", "CNTN4", "COL9A2", "SH3GL2", "MYH11", "SCN3B", "BRSK1", "COL1A2", "S100A6", "TTC8", "ST8SIA4", "MYH10", "FYN", "UNC5B", "INTU", "DOCK1", "PTPN11", "EVL", "KAL1", "FZD1", "MAP2", "SPTBN1", "MYO10", "DLG4", "LGI1", "SHANK1", "GSN", "FZD7", "SEMA6A", "FOXD2", "APOD",…
20	REGULATION OF ANATOMICAL STRUCTURE MORPHOGENESIS%GO%GO:0022603	1.67471e-14	2.48444e-12	0.975995	0.384692	2.92399	184	c("THBS4", "KIT", "SULF1", "EPHA3", "THY1", "SFRP1", "BMP4", "APOE", "LEF1", "THBS2", "TGFB2", "CHN1", "HDAC9", "CHRNA3", "NTRK2", "TGFB3", "FGF1", "APOA1", "DIXDC1", "SOX15", "SOX8", "FMNL3", "KANK1", "SIPA1L1", "CAPN3", "FOXC2", "CAMK2B", "ZNF135", "PTPRD", "SERPINF1", "NPPB", "WTIP", "MAP2K5", "MYO10", "WNT2B", "LRRC4C", "SOX9", "TNIK", "FGF13", "FZD7", "GPR124", "EPHB3", "BAMBI", "AMOT", "RAM…
21	REGULATION OF CELLULAR COMPONENT ORGANIZATION%GO%GO:0051128	4.17086e-14	5.89283e-12	0.965328	0.292584	2.45676	425	c("SFRP4", "FAP", "FRZB", "PLCE1", "KIT", "SNCA", "PLEKHH2", "EPHA3", "THY1", "SOCS2", "SFRP1", "BMP4", "DPYSL3", "SNCAIP", "SGIP1", "HRK", "APOE", "STK38L", "AGRN", "BDNF", "LEF1", "PPP1R16B", "PAK1", "TGFB2", "CHN1", "CHRNA3", "NTRK2", "TGFB3", "DPP4", "LTBP4", "APOA1", "BCL2", "TNFSF10", "DIXDC1", "DDR1", "MLLT11", "FMNL3", "NES", "KANK1", "DACT3", "NET1", "APBB2", "PIK3R1", "HAS3", "SIPA1L1",…
22	POSITIVE REGULATION OF RNA METABOLIC PROCESS%GO%GO:0051254	4.6673e-14	6.29448e-12	0.965328	0.300222	2.48629	371	c("FZD2", "SOX4", "SFRP1", "BMP4", "ESR1", "MDFIC", "AGRN", "RUNX2", "TCF4", "LEF1", "FOXS1", "TGFB3", "GLI1", "PRMT2", "FGF1", "CREB5", "DYRK1B", "DBP", "RNASEL", "MSTN", "MLLT11", "SOX15", "PLAGL1", "SOX8", "BEX1", "PKD2", "GATA5", "HAS3", "CKAP2", "CAPN3", "ANKRD1", "ETV4", "FOXC2", "IL33", "MYOCD", "FZD1", "MAP2K5", "RORA", "TP53INP1", "DLG4", "LRP5", "IRF6", "ZFP90", "SOX9", "TP53INP2", "LMO…
23	POSITIVE REGULATION OF NUCLEOBASE-CONTAINING COMPOUND METABOLIC PROCESS%GO%GO:0045935	5.66416e-14	7.30677e-12	0.965328	0.293399	2.45821	412	c("FZD2", "SOX4", "SFRP1", "EDNRA", "BMP4", "ESR1", "MDFIC", "APOE", "AGRN", "RUNX2", "TCF4", "LEF1", "NTRK2", "FOXS1", "TGFB3", "GLI1", "PRMT2", "FGF1", "CREB5", "DYRK1B", "DBP", "RNASEL", "MSTN", "MLLT11", "SOX15", "PLAGL1", "SOX8", "BEX1", "PKD2", "GATA5", "HAS3", "CKAP2", "CAPN3", "ANKRD1", "ETV4", "FOXC2", "IL33", "MYOCD", "FZD1", "MAP2K5", "RORA", "TP53INP1", "DLG4", "LRP5", "IRF6", "ZFP90"…
24	POSITIVE REGULATION OF BIOSYNTHETIC PROCESS%GO%GO:0009891	6.11729e-14	7.5625e-12	0.954542	0.289152	2.43185	436	c("FZD2", "SNCA", "SOX4", "SFRP1", "EDNRA", "JAK2", "BMP4", "ESR1", "MDFIC", "APOE", "AGRN", "RUNX2", "TCF4", "LEF1", "TGFB2", "NTRK2", "FOXS1", "TGFB3", "DDAH1", "GLI1", "PRMT2", "FGF1", "CREB5", "DYRK1B", "DBP", "RNASEL", "MSTN", "MLLT11", "SOX15", "PLAGL1", "SOX8", "BEX1", "PKD2", "GATA5", "HAS3", "CKAP2", "CAPN3", "SCARB1", "ANKRD1", "ETV4", "FOXC2", "IL33", "MYOCD", "FZD1", "MAP2K5", "RORA",…
25	CELL PROJECTION ORGANIZATION%GO%GO:0030030	6.38916e-14	7.58266e-12	0.954542	0.344472	2.72987	246	c("SFRP4", "ST8SIA2", "FRZB", "FZD2", "KIT", "EPHA3", "NTNG2", "COL9A1", "DPYSL3", "FARP1", "CC2D2A", "AGRN", "ENAH", "PAK1", "HFE2", "CHN1", "CNTN4", "COL9A2", "SH3GL2", "MYH11", "SCN3B", "BRSK1", "COL1A2", "S100A6", "TTC8", "ST8SIA4", "MYH10", "FYN", "UNC5B", "INTU", "DOCK1", "PTPN11", "EVL", "KAL1", "FZD1", "LIMA1", "MAP2", "SPTBN1", "MYO10", "DLG4", "LGI1", "SHANK1", "GSN", "FZD7", "SEMA6A", …
26	NEUROGENESIS%GO%GO:0022008	7.38604e-14	8.42861e-12	0.954542	0.317875	2.59578	320	c("SFRP4", "ST8SIA2", "FRZB", "FZD2", "PROM1", "SERPINE2", "SOX4", "EPHA3", "THY1", "NTNG2", "COL9A1", "DPYSL3", "FARP1", "APOE", "AGRN", "TCF4", "LEF1", "ENAH", "PAK1", "HFE2", "TGFB2", "CHN1", "CNTN4", "CHRNA3", "COL9A2", "NTRK2", "SH3GL2", "MYH11", "SCN3B", "ZEB1", "BRSK1", "PCDH12", "COL1A2", "S100A6", "ST8SIA4", "DIXDC1", "MYH10", "FYN", "SOX8", "UNC5B", "KANK1", "SIPA1L1", "DOCK1", "CXCR4",…
27	POSITIVE REGULATION OF CELLULAR BIOSYNTHETIC PROCESS%GO%GO:0031328	9.01729e-14	9.909e-12	0.954542	0.288809	2.42799	432	c("FZD2", "SNCA", "SOX4", "SFRP1", "EDNRA", "BMP4", "ESR1", "MDFIC", "APOE", "AGRN", "RUNX2", "TCF4", "LEF1", "NTRK2", "FOXS1", "TGFB3", "DDAH1", "GLI1", "PRMT2", "FGF1", "CREB5", "DYRK1B", "DBP", "RNASEL", "MSTN", "MLLT11", "SOX15", "PLAGL1", "SOX8", "BEX1", "PKD2", "GATA5", "HAS3", "CKAP2", "CAPN3", "SCARB1", "ANKRD1", "ETV4", "FOXC2", "IL33", "MYOCD", "FZD1", "MAP2K5", "RORA", "TP53INP1", "DLG…
28	LOCOMOTION%GO%GO:0040011	1.30236e-13	1.38003e-11	0.943632	0.325262	2.62676	285	c("THBS4", "FAP", "ST8SIA2", "HTR2B", "KIT", "PROS1", "EPHA3", "ENPP2", "COL9A1", "BMP4", "DPYSL3", "JAM2", "AGRN", "ACE2", "LEF1", "ENAH", "PAK1", "HFE2", "TGFB2", "CHN1", "FSCN1", "CNTN4", "COL9A2", "NTRK2", "SH3GL2", "DPP4", "MYH11", "SCG2", "SCN3B", "COL1A2", "GPC6", "ST8SIA4", "DDR1", "MYH10", "ATP1B2", "FYN", "ASTN1", "SOX8", "FMNL3", "UNC5B", "VEGFC", "PIK3R1", "FERMT1", "DOCK1", "CXCR4", …
29	GENERATION OF NEURONS%GO%GO:0048699	1.46629e-13	1.50016e-11	0.943632	0.324026	2.63495	310	c("SFRP4", "ST8SIA2", "FRZB", "FZD2", "PROM1", "SERPINE2", "SOX4", "EPHA3", "THY1", "NTNG2", "COL9A1", "DPYSL3", "FARP1", "APOE", "AGRN", "TCF4", "LEF1", "ENAH", "PAK1", "HFE2", "TGFB2", "CHN1", "CNTN4", "CHRNA3", "COL9A2", "NTRK2", "SH3GL2", "MYH11", "SCN3B", "ZEB1", "BRSK1", "PCDH12", "COL1A2", "S100A6", "ST8SIA4", "DIXDC1", "MYH10", "FYN", "SOX8", "UNC5B", "KANK1", "SIPA1L1", "DOCK1", "CXCR4",…
30	POSITIVE REGULATION OF MACROMOLECULE BIOSYNTHETIC PROCESS%GO%GO:0010557	1.72129e-13	1.70236e-11	0.943632	0.291034	2.43183	405	c("FZD2", "SOX4", "SFRP1", "JAK2", "BMP4", "ESR1", "MDFIC", "AGRN", "RUNX2", "TCF4", "LEF1", "TGFB2", "FOXS1", "TGFB3", "GLI1", "PRMT2", "FGF1", "CREB5", "DYRK1B", "DBP", "RNASEL", "MSTN", "MLLT11", "SOX15", "PLAGL1", "SOX8", "BEX1", "PKD2", "GATA5", "HAS3", "CKAP2", "CAPN3", "ANKRD1", "ETV4", "FOXC2", "IL33", "MYOCD", "FZD1", "MAP2K5", "RORA", "TP53INP1", "DLG4", "LRP5", "IRF6", "ZFP90", "SOX9",…
31	POSITIVE REGULATION OF TRANSCRIPTION, DNA-DEPENDENT%GO%GO:0045893	1.84879e-13	1.76947e-11	0.943632	0.303343	2.49551	346	c("FZD2", "SOX4", "SFRP1", "BMP4", "ESR1", "MDFIC", "AGRN", "RUNX2", "TCF4", "LEF1", "FOXS1", "TGFB3", "GLI1", "PRMT2", "FGF1", "CREB5", "DYRK1B", "DBP", "RNASEL", "MSTN", "MLLT11", "SOX15", "PLAGL1", "SOX8", "BEX1", "PKD2", "GATA5", "HAS3", "CKAP2", "CAPN3", "ANKRD1", "ETV4", "FOXC2", "IL33", "MYOCD", "FZD1", "MAP2K5", "RORA", "TP53INP1", "DLG4", "LRP5", "IRF6", "ZFP90", "SOX9", "TP53INP2", "LMO…
32	REGULATION OF CELL PROLIFERATION%GO%GO:0042127	2.06844e-13	1.91784e-11	0.943632	0.315122	2.56217	309	c("SFRP4", "THBS4", "FRZB", "HTR2B", "KIT", "OGN", "NPR3", "SOX4", "SULF1", "PTN", "IGFBP5", "TNFRSF4", "SFRP1", "JAK2", "BMP4", "PODN", "ALDH1A2", "APOE", "ACE2", "IGFBP3", "LEF1", "NOX4", "PAK1", "TGFB2", "CTF1", "NTRK2", "TGFB3", "GLI1", "FGF1", "DPP4", "SCG2", "S100A6", "BCL2", "GPNMB", "SOX15", "SOX8", "LEPREL1", "VEGFC", "NES", "PKD2", "MYOCD", "CD47", "TP53INP1", "LRP5", "IRF6", "GAB2", "L…
33	REGULATION OF MULTICELLULAR ORGANISMAL DEVELOPMENT%GO%GO:2000026	2.25149e-13	1.9967e-11	0.943632	0.311761	2.53934	315	c("SFRP4", "THBS4", "FRZB", "PROM1", "SERPINE2", "SULF1", "EPHA3", "THY1", "SFRP1", "BMP4", "DPYSL3", "BOC", "APOE", "AGRN", "BDNF", "IGFBP3", "TCF4", "LEF1", "THBS2", "TGFB2", "CHN1", "CNTN4", "HDAC9", "CHRNA3", "NTRK2", "TGFB3", "FGF1", "ZEB1", "APOA1", "DIXDC1", "SOX15", "SOX8", "KANK1", "SIPA1L1", "CAPN3", "FOXC2", "CXCR4", "CAMK2B", "PTPRD", "SERPINF1", "PRICKLE1", "NPPB", "MYOCD", "MAP2K5",…
34	POSITIVE REGULATION OF MOLECULAR FUNCTION%GO%GO:0044093	2.2881e-13	1.9967e-11	0.932595	0.302178	2.50192	366	c("HTR2B", "FZD2", "PLCE1", "KIT", "SNCA", "NPR3", "THY1", "CCND1", "SFRP1", "EDNRA", "JAK2", "BMP4", "PDE1A", "ESR1", "MDFIC", "RGS4", "APOE", "AGRN", "DRD4", "PAK1", "TGFB2", "RGS11", "CHRNA3", "NTRK2", "CCND2", "RGS5", "TPD52L1", "APOA1", "TNFSF10", "RABGAP1L", "PDE1C", "BEX1", "PKD2", "NET1", "KDELR3", "SIPA1L1", "CAPN3", "DOCK1", "ALDH1A1", "SCARB1", "PCOLCE2", "CXCR4", "MYOCD", "EDA2R", "FZ…
35	POSITIVE REGULATION OF NITROGEN COMPOUND METABOLIC PROCESS%GO%GO:0051173	2.7274e-13	2.31206e-11	0.932595	0.287952	2.41717	419	c("FZD2", "SOX4", "SFRP1", "EDNRA", "BMP4", "ESR1", "MDFIC", "APOE", "AGRN", "RUNX2", "TCF4", "LEF1", "NTRK2", "FOXS1", "TGFB3", "DDAH1", "GLI1", "PRMT2", "FGF1", "CREB5", "DYRK1B", "DBP", "RNASEL", "MSTN", "MLLT11", "SOX15", "PLAGL1", "SOX8", "BEX1", "PKD2", "GATA5", "HAS3", "CKAP2", "CAPN3", "ANKRD1", "ETV4", "FOXC2", "IL33", "MYOCD", "FZD1", "MAP2K5", "RORA", "TP53INP1", "DLG4", "LRP5", "IRF6"…
36	REGULATION OF TRANSCRIPTION FROM RNA POLYMERASE II PROMOTER%GO%GO:0006357	3.38636e-13	2.79093e-11	0.932595	0.288659	2.41465	407	c("SOX4", "BMP4", "ESR1", "AGRN", "RUNX2", "TCF4", "LEF1", "CRYM", "HDAC9", "MYCN", "FOXS1", "TGFB3", "GLI1", "FGF1", "ZEB1", "DBP", "RNASEL", "PER2", "SOX15", "PLAGL1", "SOX8", "BEX1", "PKD2", "GATA5", "CKAP2", "ANKRD1", "FOXC2", "CBX7", "SMAD9", "USP9Y", "IL33", "MYOCD", "MAP2K5", "RORA", "NR2F1", "DLG4", "ZNF444", "LRP5", "SOX9", "LMO2", "SP4", "FOXD2", "TNIP1", "MDM4", "INHBA", "HMGB2", "IGF1…
37	CELL DEVELOPMENT%GO%GO:0048468	4.01016e-13	3.21572e-11	0.932595	0.317051	2.57385	302	c("SFRP4", "ST8SIA2", "FRZB", "HTR2B", "FZD2", "KIT", "ANTXR1", "SOX4", "SULF1", "EPHA3", "THY1", "NTNG2", "COL9A1", "BMP4", "DPYSL3", "FARP1", "MYOZ1", "AGRN", "LEF1", "ENAH", "PAK1", "HFE2", "TGFB2", "CHN1", "CNTN4", "COL9A2", "NTRK2", "SH3GL2", "FOXS1", "PRMT2", "MYH11", "SCN3B", "BRSK1", "PCDH12", "COL1A2", "S100A6", "ST8SIA4", "MYH10", "FYN", "SOX15", "SOX8", "UNC5B", "CAPN3", "DOCK1", "ANKR…
38	CYTOSKELETAL PART%GO%GO:0044430	4.89311e-13	3.82049e-11	0.921426	0.30192	2.48986	353	c("TNNT1", "PLEKHH2", "TNNT3", "DPYSL3", "MYL1", "CRHBP", "MAP1A", "EVC", "PAK1", "FSCN1", "CHRNA3", "HSD17B14", "MAP6", "BRSK1", "IQGAP2", "MYL7", "TTC8", "TPM3", "MYH10", "MAP4", "NES", "PKD2", "KIF13A", "MID1", "CKAP2", "SIPA1L1", "TCEA2", "DNALI1", "WDR62", "LIMA1", "DYNC1LI2", "MAP2", "MYL5", "RAB11FIP3", "DLG4", "PLK2", "SHANK1", "DYNC2LI1", "DNAH1", "FGF13", "LRRCC1", "AK5", "TNNI3", "GRIA…
39	POSITIVE REGULATION OF GENE EXPRESSION%GO%GO:0010628	5.70248e-13	4.33827e-11	0.921426	0.298637	2.47173	364	c("SFRP4", "FZD2", "SOX4", "SFRP1", "BMP4", "ESR1", "MDFIC", "AGRN", "RUNX2", "TCF4", "LEF1", "NTRK2", "FOXS1", "TGFB3", "GLI1", "PRMT2", "FGF1", "CREB5", "DYRK1B", "DBP", "RNASEL", "MSTN", "MLLT11", "SOX15", "PLAGL1", "SOX8", "BEX1", "PKD2", "GATA5", "HAS3", "CKAP2", "CAPN3", "ANKRD1", "ETV4", "FOXC2", "IL33", "MYOCD", "FZD1", "MAP2K5", "RORA", "TP53INP1", "DLG4", "EPHX2", "LRP5", "IRF6", "ZFP90…
40	REGULATION OF CATABOLIC PROCESS%GO%GO:0009894	5.93508e-13	4.40234e-11	0.921426	0.367163	2.79221	185	c("HTR2B", "EPHA3", "THY1", "SFRP1", "TNNT3", "RGS4", "APOE", "AGRN", "RGS11", "NTRK2", "RGS5", "BCL2", "RABGAP1L", "NET1", "ASB9", "SIPA1L1", "DOCK1", "ALDH1A1", "PTPN3", "SCARB1", "PRICKLE1", "RGS17", "TP53INP1", "TP53INP2", "ALS2CR12", "TNNI3", "MDM4", "EPHB3", "RGS6", "OSBPL7", "IGF1", "PLK3", "PDE3B", "RALBP1", "ULK1", "RABGAP1", "ALS2", "NTF3", "NRBP2", "RAPGEF6", "DACT1", "LLGL1", "CHN2", …
41	POSITIVE REGULATION OF SIGNALING%GO%GO:0023056	6.3647e-13	4.60587e-11	0.921426	0.323507	2.59585	267	c("SFRP4", "HTR2B", "PLCE1", "KIT", "SNCA", "SOX4", "SULF1", "SFRP1", "JAK2", "BMP4", "ESR1", "MDFIC", "DKK2", "EVC", "DRD4", "PAK1", "TGFB2", "HBEGF", "NTRK2", "TGFB3", "GLI1", "FGF1", "TPD52L1", "TNFSF10", "DIXDC1", "RSAD2", "KANK1", "PKD2", "MID1", "ANKRD1", "CXCR4", "S100A13", "SULF2", "EDA2R", "PELI2", "MAP2K5", "DLG4", "PLK2", "LGI1", "WNT2B", "SOX9", "DDX60", "FZD7", "WNT9A", "FOXD2", "INH…
42	POSITIVE REGULATION OF CELL COMMUNICATION%GO%GO:0010647	6.80617e-13	4.80808e-11	0.921426	0.326016	2.61566	269	c("SFRP4", "HTR2B", "PLCE1", "KIT", "SOX4", "SULF1", "SFRP1", "JAK2", "BMP4", "ESR1", "MDFIC", "DKK2", "EVC", "DRD4", "PAK1", "TGFB2", "HBEGF", "NTRK2", "TGFB3", "GLI1", "FGF1", "TPD52L1", "TNFSF10", "DIXDC1", "RSAD2", "KANK1", "PKD2", "MID1", "ANKRD1", "CXCR4", "S100A13", "SULF2", "EDA2R", "PELI2", "MAP2K5", "DLG4", "PLK2", "LGI1", "WNT2B", "SOX9", "DDX60", "FZD7", "WNT9A", "FOXD2", "INHBA", "BA…
43	CELL PROJECTION%GO%GO:0042995	9.39089e-13	6.33245e-11	0.91012	0.331813	2.64921	260	c("SFRP4", "FAP", "FRZB", "FZD2", "PROM1", "SNCA", "ANTXR1", "MME", "PLEKHH2", "THY1", "SFRP1", "DPYSL3", "FARP1", "CC2D2A", "APOE", "CRHBP", "EVC", "PAK1", "TGFB2", "FSCN1", "CNTN4", "CHRNA3", "DPP4", "CDH23", "S100A6", "TTC8", "DIXDC1", "EFHC1", "CA4", "KANK1", "PKD2", "APBB2", "SIPA1L1", "PKD1L1", "EVL", "DNALI1", "FZD1", "SPTBN1", "MYO10", "DLG4", "PLK2", "SHANK1", "DYNC2LI1", "DNAH1", "PTPN1…
44	CELLULAR LOCALIZATION%GO%GO:0051641	9.39089e-13	6.33245e-11	0.91012	0.268117	2.2846	496	c("HTR2B", "KIT", "PROS1", "SYTL2", "CENPA", "KIF1A", "JAK2", "BMP4", "NDC80", "CPE", "SLC6A1", "APOE", "AGRN", "AP3M2", "CRHBP", "NRXN2", "LEFTY2", "TGFB2", "IFIT1", "SH3GL2", "TGFB3", "RASSF9", "LTBP4", "SCG2", "SCN3B", "BRSK1", "APOA1", "BCL2", "PCSK5", "MAP4", "SCRN1", "COPZ2", "VEGFC", "PKD2", "KIF13A", "RPS4Y1", "SCG5", "PACS1", "CAPN3", "LRMP", "S100A13", "CADPS", "PRICKLE1", "PDIA2", "FYC…
45	REGULATION OF CELLULAR LOCALIZATION%GO%GO:0060341	1.19288e-12	7.63298e-11	0.91012	0.354129	2.72623	200	c("KCNA5", "HTR2B", "TMEM30B", "SNCA", "SOX4", "THY1", "TNFRSF4", "SFRP1", "BMP4", "MDFIC", "SNCAIP", "CRHBP", "DRD4", "TGFB2", "XPO4", "CHRNA3", "TGFB3", "CACNA2D2", "KCNS3", "ABCC8", "RAB23", "APOA1", "RSAD2", "KANK1", "PKD2", "DACT3", "PIK3R1", "SCG5", "CAPN3", "SLC30A1", "ANKRD1", "KCNMB4", "IL33", "RAB26", "CLIP3", "LRP5", "GAB2", "MARCKS", "FZD7", "SCAMP5", "MYRIP", "APOD", "INHBA", "BAMBI"…
46	GENERIC TRANSCRIPTION PATHWAY%REACTOME%REACT_12627.3	1.20528e-12	7.63298e-11	0.91012	0.331815	2.64991	256	c("ESR1", "RUNX2", "NPPA", "ZNF704", "ZFP37", "ZNF135", "ZNF610", "ZNF517", "ZFP2", "RORA", "NR2F1", "ZFP90", "ZNF426", "ZNF425", "ZNF442", "ZNF627", "RARB", "ZNF226", "ZNF605", "ZNF775", "ZNF415", "NR2C1", "TRIM33", "ZNF596", "ZNF441", "ZNF660", "MAMLD1", "ZNF706", "ZNF436", "ZNF471", "CDKN2B", "ZNF254", "MED30", "ZNF175", "ZNF334", "TBL1XR1", "ZNF585A", "THRA", "ZNF561", "ZNF573", "ZNF688", "ZN…
47	CYTOSKELETAL PROTEIN BINDING%GO%GO:0008092	1.22374e-12	7.63298e-11	0.91012	0.380581	2.84351	167	c("TNNT1", "KCNA5", "PROM1", "SNCA", "ANTXR1", "PLEKHH2", "TNNT3", "SGIP1", "APOE", "MYOZ1", "KCNE1", "TPPP3", "KCNMA1", "FSCN1", "ACE", "BRSK1", "IQGAP2", "S100A6", "DIXDC1", "MYLIP", "MYH10", "SORBS2", "PKD2", "ANKRD23", "CAPN3", "ANKRD1", "SVIL", "CXCR4", "CLIP3", "LIMA1", "SPTBN1", "MYO10", "MARCKS", "FGF13", "TNNI3", "AGBL5", "BICD1", "ANK1", "CALD1", "TPR", "LMTK2", "RABGAP1", "STMN1", "NEX…
48	REPRODUCTION%GO%GO:0000003	1.23486e-12	7.63298e-11	0.91012	0.337682	2.65517	232	c("SFRP4", "FRZB", "FZD2", "KIT", "HSPA2", "COL16A1", "SFRP1", "CRHBP", "PTGFR", "ACE2", "NPPA", "TGFB2", "IFIT1", "TGFB3", "TRO", "BCL2", "PCSK5", "CRIP1", "SOX15", "SOX8", "RPS4Y1", "REC8", "OSGIN2", "USP9Y", "PTPN11", "DNALI1", "FZD1", "PIWIL4", "WNT2B", "SOX9", "SHANK1", "TSSK6", "HPGD", "FZD7", "ADC", "MAEL", "DPY19L2", "INHBA", "IRX5", "DZIP1", "RLN2", "CYP26B1", "SMO", "MAMLD1", "GATA6", "…
49	ION BINDING%GO%GO:0043167	1.50105e-12	9.08903e-11	0.91012	0.269205	2.28604	476	c("THBS4", "ST8SIA2", "COMP", "HTR2B", "POSTN", "QPCT", "PDE5A", "SERPINE2", "SNCA", "MME", "CFH", "ENPP2", "SYTL2", "MDK", "SFRP1", "PLEKHA4", "DPYSL3", "APOE", "STK38L", "AGRN", "ACE2", "IGFBP3", "DRD4", "NOX4", "HBEGF", "CHRNA3", "GLRB", "FGF1", "LTBP4", "COL13A1", "ACE", "ICK", "BRSK1", "SOD3", "S100A6", "MYL7", "ST8SIA4", "MASP1", "APOBEC3G", "MYH10", "CRIP1", "LCN12", "PKD2", "DNASE1L3", "S…
50	REPRODUCTIVE PROCESS%GO%GO:0022414	2.39514e-12	1.42128e-10	0.898671	0.352595	2.71801	205	c("SFRP4", "FRZB", "FZD2", "KIT", "COL16A1", "SFRP1", "CRHBP", "PTGFR", "ACE2", "NPPA", "TGFB2", "IFIT1", "TGFB3", "TRO", "BCL2", "PCSK5", "CRIP1", "SOX15", "SOX8", "RPS4Y1", "REC8", "OSGIN2", "USP9Y", "PTPN11", "DNALI1", "FZD1", "PIWIL4", "WNT2B", "SOX9", "SHANK1", "TSSK6", "HPGD", "FZD7", "ADC", "MAEL", "DPY19L2", "INHBA", "IRX5", "DZIP1", "RLN2", "CYP26B1", "SMO", "MAMLD1", "GATA6", "PTHLH", "…
51	CELL MORPHOGENESIS INVOLVED IN DIFFERENTIATION%GO%GO:0000904	2.69536e-12	1.56807e-10	0.898671	0.358322	2.74341	190	c("SFRP4", "ST8SIA2", "FRZB", "FZD2", "ANTXR1", "EPHA3", "NTNG2", "COL9A1", "BMP4", "DPYSL3", "FARP1", "AGRN", "LEF1", "ENAH", "PAK1", "HFE2", "TGFB2", "CHN1", "CNTN4", "COL9A2", "SH3GL2", "FOXS1", "MYH11", "SCN3B", "BRSK1", "COL1A2", "S100A6", "ST8SIA4", "MYH10", "FYN", "UNC5B", "DOCK1", "FOXC2", "PTPN11", "EVL", "KAL1", "FZD1", "MAP2", "DACT2", "SPTBN1", "MYO10", "DLG4", "LGI1", "SOX9", "SHANK1…
52	NEGATIVE REGULATION OF METABOLIC PROCESS%GO%GO:0009892	3.31563e-12	1.89182e-10	0.898671	0.263916	2.24734	489	c("HTR2B", "SERPINE2", "SNCA", "SOX4", "THY1", "IGFBP5", "TNFRSF4", "SFRP1", "PIK3IP1", "BMP4", "UCHL1", "ESR1", "MDFIC", "RGS4", "APOE", "STK38L", "TCEAL7", "RUNX2", "IGFBP3", "LEF1", "DRD4", "PLAT", "CRYM", "HDAC9", "APLP1", "FOXS1", "TGFB3", "ACADL", "ARID5A", "PRMT2", "ZEB1", "ENC1", "BCL2", "MASP1", "PER2", "SOX15", "SOX8", "CAPN3", "PTPN3", "ANKRD1", "FOXC2", "CBX7", "EIF4EBP3", "PRICKLE1",…
53	ACTIN FILAMENT-BASED PROCESS%GO%GO:0030029	4.51839e-12	2.52945e-10	0.887075	0.440275	3.01843	102	c("TNNT1", "KIT", "ANTXR1", "TNNT3", "JAK2", "DPYSL3", "MYL1", "MYOZ1", "PAK1", "FSCN1", "MYH11", "MYL7", "TPM3", "MYH10", "SIPA1L1", "CAPN3", "ANKRD1", "EVL", "LIMA1", "TNIK", "GSN", "TNNI3", "ATXN3", "AMOT", "RICTOR", "FBXO8", "DYNLL1", "SPIRE1", "LLGL1", "RND3", "MRAS", "NEB", "CSRP3", "FGD5", "SHROOM2", "ACTN2", "SHROOM1", "OBSCN", "SORBS1", "CDC42BPB", "PACSIN1", "MYPN", "MON2", "ARHGEF2", "…
54	NEURON DIFFERENTIATION%GO%GO:0030182	4.6299e-12	2.54387e-10	0.887075	0.329987	2.6061	241	c("SFRP4", "ST8SIA2", "FRZB", "FZD2", "PROM1", "SOX4", "EPHA3", "THY1", "NTNG2", "COL9A1", "DPYSL3", "FARP1", "AGRN", "LEF1", "ENAH", "PAK1", "HFE2", "TGFB2", "CHN1", "CNTN4", "COL9A2", "NTRK2", "SH3GL2", "MYH11", "SCN3B", "BRSK1", "PCDH12", "COL1A2", "S100A6", "ST8SIA4", "MYH10", "FYN", "SOX8", "UNC5B", "DOCK1", "PTPRD", "PTPN11", "EVL", "KAL1", "FZD1", "MAP2", "SPTBN1", "MYO10", "DLG4", "LGI1",…
55	RECEPTOR BINDING%GO%GO:0005102	4.9286e-12	2.65876e-10	0.887075	0.293194	2.41556	351	c("THBS4", "SERPINE2", "PENK", "COL16A1", "ECM2", "THY1", "SOCS2", "MDK", "SFRP1", "EDIL3", "JAK2", "BMP4", "UCHL1", "ARRDC3", "APOE", "LEF1", "NPPA", "TGFB2", "APLP1", "TGFB3", "PRMT2", "FGF1", "DPP4", "LTBP4", "ACE", "FGF18", "SCG2", "ADAM22", "ESM1", "APOA1", "MSTN", "TNFSF10", "RAPSN", "FYN", "ANGPTL2", "PKD2", "PIK3R1", "S100A13", "PTPRD", "IL33", "PTPN11", "NPPB", "FZD1", "DLG4", "EPHX2", "…
56	ORGANONITROGEN COMPOUND METABOLIC PROCESS%GO%GO:1901564	5.526e-12	2.92779e-10	0.887075	0.27434	2.31717	451	c("DIO2", "FMOD", "ST8SIA2", "SLC16A9", "GATM", "HTR2B", "PDE5A", "SNCA", "OGN", "MME", "ENPP2", "LUM", "ABCG2", "OMD", "SNCAIP", "SLC44A5", "AGRN", "ST8SIA5", "ARSJ", "GSTM5", "ORMDL3", "DRD4", "NPPA", "NOX4", "TGFB2", "CHST6", "GNB3", "DDAH1", "ASPA", "ACE", "RAB23", "CHSY3", "PRELP", "APOA1", "GPC6", "ST8SIA4", "INMT", "APOBEC3G", "NMNAT2", "PCSK5", "B3GNT2", "EXT1", "CDO1", "HAS3", "CSAD", "N…
57	IDENTICAL PROTEIN BINDING%GO%GO:0042802	6.42387e-12	3.34379e-10	0.887075	0.306498	2.48071	297	c("FAP", "KIT", "SNCA", "SFRP1", "ABCG2", "ESR1", "APOE", "PAK1", "CRYM", "TGFB2", "APLP1", "NTRK2", "SH3GL2", "TGFB3", "PRMT2", "DPP4", "TPD52L1", "COL1A2", "APOA1", "S100A6", "BCL2", "MASP1", "APOBEC3G", "FYN", "PKD2", "EXT1", "TYRP1", "S100A13", "RAB11FIP3", "EPHX2", "ALDH5A1", "SHANK1", "HPGD", "TPCN1", "GZMA", "ATPIF1", "TP53I3", "ALDH4A1", "INHBA", "CD247", "GSTA4", "PRTFDC1", "KLHL7", "TPR…
58	NEURON PROJECTION MORPHOGENESIS%GO%GO:0048812	6.81813e-12	3.48783e-10	0.887075	0.367061	2.74449	169	c("SFRP4", "ST8SIA2", "FRZB", "FZD2", "EPHA3", "NTNG2", "COL9A1", "DPYSL3", "FARP1", "AGRN", "ENAH", "PAK1", "HFE2", "CHN1", "CNTN4", "COL9A2", "SH3GL2", "MYH11", "SCN3B", "BRSK1", "COL1A2", "S100A6", "ST8SIA4", "MYH10", "FYN", "UNC5B", "DOCK1", "PTPN11", "EVL", "KAL1", "FZD1", "MAP2", "SPTBN1", "MYO10", "DLG4", "LGI1", "SHANK1", "FZD7", "SEMA6A", "FOXD2", "APOD", "EPHB3", "COL3A1", "ARHGEF12", "…
59	REGULATION OF DEVELOPMENTAL PROCESS%GO%GO:0050793	7.02421e-12	3.53235e-10	0.887075	0.283813	2.36389	394	c("SFRP4", "THBS4", "FRZB", "PROM1", "KIT", "SERPINE2", "SULF1", "EPHA3", "THY1", "SFRP1", "BMP4", "DPYSL3", "BOC", "APOE", "AGRN", "BDNF", "IGFBP3", "TCF4", "LEF1", "THBS2", "TGFB2", "CHN1", "CNTN4", "HDAC9", "CHRNA3", "NTRK2", "TGFB3", "FGF1", "LTBP4", "ZEB1", "APOA1", "DIXDC1", "SOX15", "SOX8", "FMNL3", "KANK1", "SIPA1L1", "CAPN3", "FOXC2", "CXCR4", "CAMK2B", "ZNF135", "PTPRD", "SERPINF1", "PR…
60	REGULATION OF CELL DEVELOPMENT%GO%GO:0060284	7.92008e-12	3.91648e-10	0.875325	0.389838	2.83425	143	c("SERPINE2", "EPHA3", "THY1", "SFRP1", "BMP4", "DPYSL3", "BOC", "APOE", "AGRN", "IGFBP3", "TCF4", "LEF1", "TGFB2", "CHN1", "CNTN4", "HDAC9", "CHRNA3", "NTRK2", "TGFB3", "ZEB1", "DIXDC1", "SOX8", "KANK1", "SIPA1L1", "CXCR4", "CAMK2B", "PTPRD", "SERPINF1", "LRRC4C", "SOX9", "TNIK", "FGF13", "EPHB3", "BAMBI", "SDC2", "SMO", "SARM1", "VWC2", "TCF7L2", "ROBO1", "PLCB1", "SFRP2", "PRKD1", "HDAC5", "HD…
61	NEGATIVE REGULATION OF CELLULAR METABOLIC PROCESS%GO%GO:0031324	8.22491e-12	4.00054e-10	0.875325	0.266379	2.25726	466	c("HTR2B", "SERPINE2", "SNCA", "SOX4", "THY1", "IGFBP5", "TNFRSF4", "SFRP1", "BMP4", "UCHL1", "MDFIC", "RGS4", "APOE", "STK38L", "TCEAL7", "RUNX2", "IGFBP3", "LEF1", "DRD4", "PLAT", "CRYM", "HDAC9", "APLP1", "FOXS1", "TGFB3", "ACADL", "ARID5A", "PRMT2", "ZEB1", "ENC1", "BCL2", "PER2", "SOX15", "SOX8", "CAPN3", "PTPN3", "ANKRD1", "FOXC2", "CBX7", "EIF4EBP3", "PRICKLE1", "MYOCD", "NAB1", "MAP2K5", …
62	POSITIVE REGULATION OF SIGNAL TRANSDUCTION%GO%GO:0009967	9.54567e-12	4.56807e-10	0.875325	0.321733	2.56873	260	c("SFRP4", "HTR2B", "PLCE1", "KIT", "SOX4", "SULF1", "SFRP1", "JAK2", "BMP4", "ESR1", "MDFIC", "DKK2", "EVC", "DRD4", "PAK1", "TGFB2", "HBEGF", "NTRK2", "TGFB3", "GLI1", "FGF1", "TPD52L1", "TNFSF10", "DIXDC1", "RSAD2", "KANK1", "PKD2", "MID1", "ANKRD1", "CXCR4", "S100A13", "SULF2", "EDA2R", "PELI2", "MAP2K5", "PLK2", "WNT2B", "SOX9", "DDX60", "FZD7", "WNT9A", "FOXD2", "INHBA", "BAMBI", "GRB10", "…
63	RESPONSE TO EXTERNAL STIMULUS%GO%GO:0009605	1.20671e-11	5.68305e-10	0.875325	0.322641	2.5706	254	c("ST8SIA2", "KIT", "ENPP2", "SFRP1", "COL9A1", "BMP4", "DPYSL3", "AGRN", "LEF1", "ENAH", "PAK1", "HFE2", "TGFB2", "CHN1", "CNTN4", "COL9A2", "SH3GL2", "GADD45A", "GLRB", "MYH11", "ELOVL4", "SCG2", "RAB23", "SCN3B", "PLEKHB1", "COL1A2", "ST8SIA4", "MYH10", "FYN", "UNC5B", "VEGFC", "PKD2", "DOCK1", "ANKRD1", "CXCR4", "PKD1L1", "PTPN11", "EVL", "KAL1", "SPTBN1", "MYO10", "DLG4", "LGI1", "SOX9", "TP…
64	CELL MORPHOGENESIS INVOLVED IN NEURON DIFFERENTIATION%GO%GO:0048667	1.36899e-11	6.33408e-10	0.875325	0.369674	2.74976	163	c("SFRP4", "ST8SIA2", "FRZB", "FZD2", "EPHA3", "NTNG2", "COL9A1", "DPYSL3", "FARP1", "AGRN", "ENAH", "PAK1", "HFE2", "CHN1", "CNTN4", "COL9A2", "SH3GL2", "MYH11", "SCN3B", "BRSK1", "COL1A2", "S100A6", "ST8SIA4", "MYH10", "FYN", "UNC5B", "DOCK1", "PTPN11", "EVL", "KAL1", "FZD1", "MAP2", "SPTBN1", "MYO10", "DLG4", "LGI1", "SHANK1", "FZD7", "SEMA6A", "FOXD2", "APOD", "EPHB3", "COL3A1", "ARHGEF12", "…
65	POSITIVE REGULATION OF CATALYTIC ACTIVITY%GO%GO:0043085	1.38765e-11	6.33408e-10	0.875325	0.303887	2.46039	295	c("HTR2B", "PLCE1", "KIT", "SNCA", "NPR3", "THY1", "CCND1", "SFRP1", "EDNRA", "JAK2", "BMP4", "PDE1A", "ESR1", "MDFIC", "RGS4", "APOE", "AGRN", "DRD4", "PAK1", "TGFB2", "RGS11", "CHRNA3", "NTRK2", "CCND2", "RGS5", "TPD52L1", "APOA1", "TNFSF10", "RABGAP1L", "PDE1C", "PKD2", "NET1", "KDELR3", "SIPA1L1", "DOCK1", "ALDH1A1", "SCARB1", "PCOLCE2", "CXCR4", "RGS17", "MAP2K5", "PERP", "SOX7", "TNIK", "FG…
66	AXONOGENESIS%GO%GO:0007409	2.51052e-11	1.12859e-09	0.863415	0.369193	2.73162	157	c("SFRP4", "ST8SIA2", "FRZB", "FZD2", "EPHA3", "NTNG2", "COL9A1", "DPYSL3", "AGRN", "ENAH", "PAK1", "HFE2", "CHN1", "CNTN4", "COL9A2", "SH3GL2", "MYH11", "SCN3B", "BRSK1", "COL1A2", "S100A6", "ST8SIA4", "MYH10", "FYN", "UNC5B", "DOCK1", "PTPN11", "EVL", "KAL1", "FZD1", "SPTBN1", "MYO10", "DLG4", "LGI1", "FZD7", "SEMA6A", "FOXD2", "APOD", "EPHB3", "COL3A1", "ARHGEF12", "ANK1", "FEZ1", "SMO", "SEMA…
67	REGULATION OF TRANSPORT%GO%GO:0051049	2.7405e-11	1.21359e-09	0.863415	0.3018	2.44842	301	c("SFRP4", "KCNA5", "HTR2B", "TMEM30B", "SNCA", "SOX4", "THY1", "TNFRSF4", "SFRP1", "SCN2B", "BMP4", "MDFIC", "SNCAIP", "SGIP1", "APOE", "CRHBP", "DRD4", "KCNE1", "TGFB2", "XPO4", "CHRNA3", "TGFB3", "CACNA2D2", "KCNS3", "ABCC8", "RAB23", "SCN3B", "SCN4B", "APOA1", "BCL2", "RSAD2", "KANK1", "PKD2", "DACT3", "PIK3R1", "SCG5", "CAPN3", "SLC30A1", "SCARB1", "ANKRD1", "CAMK2B", "KCNMB4", "IL33", "PTPN…
68	CELLULAR COMPONENT MOVEMENT%GO%GO:0006928	2.8375e-11	1.22013e-09	0.863415	0.321682	2.54924	245	c("THBS4", "FAP", "TNNT1", "HTR2B", "KIT", "PROS1", "EPHA3", "ENPP2", "KIF1A", "TNNT3", "JAK2", "JAM2", "MYL1", "AP3M2", "LEF1", "TGFB2", "FSCN1", "NTRK2", "DPP4", "SCG2", "COL1A2", "GPC6", "MYL7", "DDR1", "MYLIP", "TPM3", "MYH10", "ATP1B2", "FYN", "MAP4", "ASTN1", "SOX8", "FMNL3", "VEGFC", "PIK3R1", "KIF13A", "FERMT1", "CXCR4", "FYCO1", "PTPN11", "KAL1", "DNALI1", "CD47", "PODXL2", "DNAH1", "FGF…
69	ENZYME LINKED RECEPTOR PROTEIN SIGNALING PATHWAY%GO%GO:0007167	2.8375e-11	1.22013e-09	0.863415	0.308176	2.49077	287	c("FMOD", "PLCE1", "KIT", "SULF1", "EPHA3", "PTN", "SOCS2", "JAK2", "BMP4", "PDE1A", "GDF10", "RUNX2", "LEF1", "LEFTY2", "NPPA", "TGFB2", "GDF15", "CHN1", "HBEGF", "CHRNA3", "NTRK2", "SH3GL2", "FOXS1", "TGFB3", "FGF1", "FGF18", "ATP6V1G2", "COL1A2", "CRIM1", "DDR1", "PCSK5", "PDE1C", "VEGFC", "NET1", "PIK3R1", "TIAM2", "SIPA1L1", "FOXC2", "ARHGEF3", "SMAD9", "USP9Y", "PTPRD", "SULF2", "PTPN11", "…
70	TISSUE DEVELOPMENT%GO%GO:0009888	2.88601e-11	1.22325e-09	0.863415	0.325972	2.55798	228	c("SFRP4", "FRZB", "HTR2B", "FZD2", "PROM1", "SOX4", "SULF1", "JAK2", "BMP4", "ENAM", "LEF1", "PAK1", "TGFB2", "FOXS1", "GLI1", "FGF1", "MYH11", "COL1A2", "DDR1", "CRIP1", "SOX8", "PKD2", "GATA5", "ANKRD1", "FOXC2", "SVIL", "COL7A1", "SULF2", "PRICKLE1", "MYOCD", "EDA2R", "FZD1", "CRABP2", "DACT2", "LRP5", "IRF6", "WNT2B", "SOX9", "SOX7", "DAND5", "FZD7", "WNT9A", "FOXD2", "FOXI2", "TNNI3", "APOD…
71	REGULATION OF CELL CYCLE%GO%GO:0051726	4.64605e-11	1.94153e-09	0.851339	0.344393	2.64227	196	c("SOX4", "CCND1", "SFRP1", "BMP4", "LEF1", "TGFB2", "HERC5", "GADD45A", "PRMT2", "CCND2", "WEE1", "BEX2", "SOX15", "PLAGL1", "PKD2", "APBB2", "PTPN3", "MYOCD", "MAPK12", "TP53INP1", "PLK2", "LRP5", "IRF6", "NUSAP1", "PPP1R15A", "SOX9", "DBC1", "CRADD", "HPGD", "ING4", "INHBA", "IGF1", "EDN3", "PPP1R1C", "TPR", "GATA6", "TCF7L2", "STAG2", "CDKN2B", "DACT1", "MSH2", "PKD1", "KANK2", "KIF20B", "MFN…
72	DEVELOPMENTAL PROCESS INVOLVED IN REPRODUCTION%GO%GO:0003006	4.87525e-11	2.00901e-09	0.851339	0.479558	3.09705	75	c("SFRP4", "FRZB", "FZD2", "KIT", "SFRP1", "TGFB2", "TGFB3", "CRIP1", "SOX15", "SOX8", "OSGIN2", "PTPN11", "FZD1", "WNT2B", "SOX9", "TSSK6", "FZD7", "DPY19L2", "INHBA", "IRX5", "DZIP1", "SMO", "MAMLD1", "GATA6", "AMHR2", "CEP57", "LRRC6", "BBS4", "MSH2", "PKD1", "FZD6", "SFRP2", "SRD5A1", "LHCGR", "CBX2", "AR", "FGFR2", "TBX3", "FZD3", "CDKL2", "FGF9", "NPHP1", "KITLG", "DNAJC19", "ZP3", "BBS2", …
73	LIPID BINDING%GO%GO:0008289	5.16976e-11	2.10119e-09	0.851339	0.409444	2.89056	117	c("SNCA", "THY1", "SYTL2", "PLEKHA4", "SGIP1", "ALDH1A2", "APOE", "APOA1", "PAFAH2", "LCN12", "PIK3R1", "ALDH1A1", "SCARB1", "ANXA4", "CLIP3", "LTC4S", "CRABP2", "MYO10", "GAB2", "APOM", "FRMPD4", "SDPR", "APOD", "BAIAP2L2", "RASGRP1", "OSBPL7", "COL4A3BP", "CYP26B1", "PLA2G4C", "FCHO2", "OSBP2", "SH3YL1", "PLCB1", "OSBPL2", "OSBPL10", "SNX16", "ADH5", "SNX1", "PMP2", "AR", "PIGK", "F10", "MPPE1"…
74	CELL-CELL SIGNALING%GO%GO:0007267	5.80051e-11	2.32569e-09	0.851339	0.303791	2.45588	290	c("KCNA5", "GRIA3", "SNCA", "MBP", "SCN2B", "BMP4", "KCNN3", "SLC6A1", "APOE", "AGRN", "AP3M2", "CRHBP", "GRM1", "BDNF", "KCNMB1", "DRD4", "AMPH", "TGFB2", "KCNMA1", "GDF15", "GNB3", "CTF1", "CHRNA3", "GLRB", "GABRB1", "LTBP4", "KCNS3", "ABCC8", "FGF18", "SCN3B", "BRSK1", "KCNAB1", "TNFSF10", "PCSK5", "RAPSN", "KCNA4", "SOX8", "KCNC4", "KCNK6", "CAMK2B", "KCNMB4", "SLC5A7", "FZD1", "KCNIP1", "VAM…
75	REGULATION OF CELLULAR CATABOLIC PROCESS%GO%GO:0031329	6.02558e-11	2.38372e-09	0.839089	0.354411	2.64991	169	c("HTR2B", "EPHA3", "THY1", "SFRP1", "TNNT3", "RGS4", "APOE", "AGRN", "RGS11", "NTRK2", "RGS5", "BCL2", "RABGAP1L", "NET1", "SIPA1L1", "DOCK1", "ALDH1A1", "PTPN3", "SCARB1", "PRICKLE1", "RGS17", "TP53INP1", "TP53INP2", "ALS2CR12", "TNNI3", "EPHB3", "RGS6", "IGF1", "PLK3", "RALBP1", "ULK1", "RABGAP1", "ALS2", "NTF3", "NRBP2", "RAPGEF6", "LLGL1", "CHN2", "PLCB1", "PRKAA2", "FGD5", "TSC1", "RGN", "H…
76	MUSCLE STRUCTURE DEVELOPMENT%GO%GO:0061061	6.28463e-11	2.45349e-09	0.839089	0.42431	2.91428	103	c("AEBP1", "BMP4", "BOC", "MYL1", "MYOZ1", "SGCE", "LEF1", "EVC", "CTF1", "HBEGF", "FOXS1", "MYH11", "MSTN", "SOX15", "CHODL", "LAMA2", "CAPN3", "ANKRD1", "FOXC2", "SVIL", "MKX", "MYOCD", "SGCG", "MAPK12", "TNNI3", "SORT1", "IGF1", "RAMP2", "SOX6", "SMO", "GATA6", "FBXO40", "TCF7L2", "MRAS", "NEB", "CSRP3", "CBY1", "JAG1", "FHL1", "IFRD1", "FGFR2", "CAV3", "MEF2C", "OBSCN", "MYPN", "TRIM72", "PPP…
77	GENE EXPRESSION%REACTOME%REACT_71.5	6.67788e-11	2.57315e-09	0.839089	0.259513	2.19955	467	c("ESR1", "RUNX2", "HIST1H2AC", "NPPA", "ZNF704", "RPS4Y1", "ZFP37", "ZNF135", "ZNF610", "ZNF517", "ZFP2", "RORA", "NR2F1", "ZFP90", "ZNF426", "ZNF425", "ZNF442", "ZNF627", "RARB", "ZNF226", "ZNF605", "ZNF775", "ZNF415", "HIST1H2BC", "NR2C1", "TRIM33", "ZNF596", "ZNF441", "HIST1H2BG", "ZNF660", "TPR", "MAMLD1", "ZNF706", "POLR3B", "ANP32A", "ZNF436", "ZNF471", "CDKN2B", "ZNF254", "MED30", "ZNF175…
78	ESTABLISHMENT OF LOCALIZATION IN CELL%GO%GO:0051649	6.87286e-11	2.61433e-09	0.839089	0.268681	2.25702	421	c("HTR2B", "KIT", "PROS1", "SYTL2", "CENPA", "KIF1A", "JAK2", "NDC80", "SLC6A1", "APOE", "AP3M2", "CRHBP", "LEFTY2", "TGFB2", "IFIT1", "SH3GL2", "TGFB3", "RASSF9", "LTBP4", "SCG2", "BRSK1", "APOA1", "BCL2", "PCSK5", "MAP4", "SCRN1", "COPZ2", "VEGFC", "PKD2", "KIF13A", "RPS4Y1", "SCG5", "PACS1", "LRMP", "S100A13", "CADPS", "PRICKLE1", "FYCO1", "RAB26", "SLC5A7", "PPP1R10", "SPTBN1", "VAMP1", "MYO1…
79	POSITIVE REGULATION OF HYDROLASE ACTIVITY%GO%GO:0051345	8.27901e-11	3.10934e-09	0.839089	0.369312	2.70594	149	c("KIT", "SNCA", "THY1", "SFRP1", "EDNRA", "JAK2", "PDE1A", "RGS4", "AGRN", "RGS11", "RGS5", "TPD52L1", "APOA1", "TNFSF10", "RABGAP1L", "PDE1C", "NET1", "KDELR3", "SIPA1L1", "DOCK1", "ALDH1A1", "PCOLCE2", "RGS17", "PERP", "SOX7", "GFPT1", "RGS6", "HMGB2", "RALBP1", "DDIT3", "RABGAP1", "ALS2", "ROBO1", "NTF3", "LLGL1", "MSH2", "CHN2", "BCL2L11", "SEC31A", "PLCB1", "ADCY2", "CCL5", "PRKD1", "TSC1",…
80	REGULATION OF PROTEIN METABOLIC PROCESS%GO%GO:0051246	8.92006e-11	3.30823e-09	0.839089	0.265942	2.24623	451	c("DIO2", "THBS4", "HTR2B", "PLCE1", "KIT", "SERPINE2", "SNCA", "PROS1", "CFH", "SOX4", "THY1", "IGFBP5", "CCND1", "SFRP1", "JAK2", "BMP4", "UCHL1", "MDFIC", "RGS4", "APOE", "SERPINI1", "STK38L", "ACE2", "IGFBP3", "DRD4", "PLAT", "PAK1", "TGFB2", "HERC5", "CHRNA3", "TGFB3", "GADD45A", "CCND2", "LTBP4", "ACE", "TPD52L1", "ENC1", "MASP1", "PKD2", "KDELR3", "ASB9", "CAPN3", "PTPN3", "CXCR4", "EIF4EB…
81	CELL LEADING EDGE%GO%GO:0031252	9.63735e-11	3.53012e-09	0.839089	0.472522	3.03791	74	c("SFRP4", "FAP", "FRZB", "FZD2", "ANTXR1", "PLEKHH2", "DPYSL3", "PAK1", "DPP4", "S100A6", "KANK1", "PKD2", "APBB2", "CXCR4", "EVL", "FZD1", "SPTBN1", "PTPN13", "FZD7", "IFIT5", "AMOT", "ALS2", "SH3YL1", "FZD6", "PTPRM", "FGD5", "TSC1", "MACF1", "DST", "FZD3", "CDC42BPB", "BRCA1", "PACSIN1", "ARHGEF6", "ARHGEF2", "COBL", "MYO6", "APC", "SYNE2", "JMY", "FGD6", "MTMR14", "PDXP", "ABI2", "SRGAP2", "…
82	RECEPTOR ACTIVITY%GO%GO:0004872	1.04827e-10	3.79295e-09	0.839089	0.300012	2.4256	289	c("SFRP4", "FRZB", "GRIA3", "HTR2B", "FZD2", "KIT", "NPR3", "ANTXR1", "EPHA3", "SFRP1", "GPA33", "EDNRA", "IGSF1", "ESR1", "GRM1", "ACE2", "LEF1", "CX3CR1", "PTPRR", "DRD4", "SCARA3", "CHRNA3", "NTRK2", "LEPR", "LTBP4", "LPAR4", "ELOVL4", "COLEC12", "APLNR", "CRIM1", "DDR1", "BCAM", "PTPRN2", "SCARB1", "CXCR4", "PTPRD", "LPHN3", "EDA2R", "FZD1", "CD47", "P2RY14", "DLG4", "LRP5", "XPR1", "HPGD", "…
83	CYTOSKELETON ORGANIZATION%GO%GO:0007010	1.1878e-10	4.24602e-09	0.826657	0.337744	2.59453	197	c("PLCE1", "KIT", "ANTXR1", "THY1", "CENPA", "JAK2", "DPYSL3", "NDC80", "APOE", "MYOZ1", "TPPP3", "PAK1", "FSCN1", "MYH11", "BRSK1", "MAP4", "FMNL3", "PKD2", "MID1", "SIPA1L1", "CAPN3", "ANKRD1", "ZNF135", "EVL", "WTIP", "LIMA1", "PLK2", "NUSAP1", "SHANK1", "TNIK", "FGF13", "GSN", "SEMA6A", "GZMA", "ATXN3", "AMOT", "BICD1", "RICTOR", "CETN3", "ANK1", "FBXO8", "DYNLL1", "CEP68", "STMN1", "SPIRE1",…
84	POSITIVE REGULATION OF TRANSCRIPTION FROM RNA POLYMERASE II PROMOTER%GO%GO:0045944	1.55926e-10	5.50752e-09	0.826657	0.323951	2.51738	214	c("SOX4", "BMP4", "ESR1", "AGRN", "RUNX2", "TCF4", "LEF1", "FOXS1", "TGFB3", "GLI1", "FGF1", "DBP", "RNASEL", "SOX15", "PLAGL1", "SOX8", "BEX1", "PKD2", "GATA5", "CKAP2", "ANKRD1", "FOXC2", "IL33", "MYOCD", "MAP2K5", "RORA", "DLG4", "LRP5", "SOX9", "LMO2", "FOXD2", "TNIP1", "INHBA", "HMGB2", "IGF1", "MKL2", "BMP6", "SMARCA2", "PSIP1", "GATA6", "DDIT3", "GABPA", "TCF7L2", "CDKN2B", "PKD1", "TBL1XR…
85	CONTRACTILE FIBER%GO%GO:0043292	1.7113e-10	5.97343e-09	0.826657	0.493377	3.01612	61	c("TNNT1", "TNNT3", "MYL1", "KCNE1", "PAK1", "SCN3B", "MYL7", "TPM3", "SORBS2", "CAPN3", "ANKRD1", "SVIL", "MYL5", "TNNI3", "NEXN", "NEB", "CSRP3", "SYNM", "ACTN2", "DST", "CAV3", "OBSCN", "MYOM1", "MYPN", "CACNA1D", "TNNI1", "SYNE2", "GCOM1", "KY", "TNNC2", "LDB3", "VCL", "MYL6B", "MYL9", "DMD", "HABP4", "TWF2", "RYR2", "CTNNB1", "SRI", "OBSL1", "MYOZ2", "SLC8A1", "PGM5", "PPP1R12A", "DNAJB6", "…
86	NEGATIVE REGULATION OF MACROMOLECULE METABOLIC PROCESS%GO%GO:0010605	1.91038e-10	6.59082e-09	0.826657	0.260769	2.20624	458	c("SERPINE2", "SNCA", "SOX4", "THY1", "IGFBP5", "TNFRSF4", "SFRP1", "BMP4", "UCHL1", "ESR1", "MDFIC", "RGS4", "APOE", "STK38L", "TCEAL7", "RUNX2", "IGFBP3", "LEF1", "PLAT", "CRYM", "HDAC9", "FOXS1", "TGFB3", "ARID5A", "PRMT2", "ZEB1", "ENC1", "MASP1", "PER2", "SOX15", "SOX8", "CAPN3", "PTPN3", "ANKRD1", "FOXC2", "CBX7", "EIF4EBP3", "PRICKLE1", "MYOCD", "WTIP", "NAB1", "MAP2K5", "NR2F1", "PIWIL4",…
87	NEGATIVE REGULATION OF BIOSYNTHETIC PROCESS%GO%GO:0009890	2.6976e-10	9.19975e-09	0.814036	0.280507	2.31327	353	c("IGFBP5", "TNFRSF4", "SFRP1", "BMP4", "MDFIC", "APOE", "TCEAL7", "RUNX2", "LEF1", "DRD4", "CRYM", "HDAC9", "APLP1", "FOXS1", "TGFB3", "ACADL", "ARID5A", "PRMT2", "ZEB1", "ENC1", "PER2", "SOX15", "SOX8", "CAPN3", "ANKRD1", "FOXC2", "CBX7", "EIF4EBP3", "PRICKLE1", "NAB1", "MAP2K5", "NR2F1", "SOX9", "SOX7", "SAMD4A", "ZNF425", "ING4", "MDM4", "INHBA", "BTRC", "GRB10", "HMGB2", "CRY2", "TRIM33", "P…
88	POSITIVE REGULATION OF TRANSPORT%GO%GO:0051050	3.02777e-10	1.01651e-08	0.814036	0.357459	2.64481	157	c("SFRP4", "HTR2B", "TMEM30B", "SNCA", "SOX4", "THY1", "TNFRSF4", "BMP4", "SGIP1", "APOE", "DRD4", "KCNE1", "TGFB2", "XPO4", "TGFB3", "SCN3B", "SCN4B", "KANK1", "PKD2", "PIK3R1", "CAPN3", "ANKRD1", "IL33", "PTPN11", "NPPB", "CLIP3", "GAB2", "CNKSR3", "SCAMP5", "MYRIP", "INHBA", "BAMBI", "IGF1", "BICD1", "HLA-DRB1", "EDN3", "BMP6", "TPR", "TCF7L2", "PLA2R1", "CADM1", "NTF3", "DACT1", "PTGER4", "VT…
89	REGULATION OF PURINE NUCLEOTIDE METABOLIC PROCESS%GO%GO:1900542	3.0492e-10	1.01651e-08	0.814036	0.397594	2.79775	115	c("FZD2", "EPHA3", "THY1", "SFRP1", "EDNRA", "TNNT3", "RGS4", "APOE", "AGRN", "DRD4", "APLP1", "RGS11", "NTRK2", "RGS5", "RABGAP1L", "PKD2", "NET1", "SIPA1L1", "DOCK1", "ALDH1A1", "RGS17", "ALS2CR12", "TNNI3", "EPHB3", "RGS6", "RAMP2", "PTHLH", "RALBP1", "RABGAP1", "ALS2", "NTF3", "RAPGEF6", "LLGL1", "CHN2", "PLCB1", "ADORA2B", "FGD5", "TSC1", "RGN", "LHCGR", "RASAL2", "TAX1BP3", "GABARAPL2", "VI…
90	NEURON PROJECTION DEVELOPMENT%GO%GO:0031175	3.68579e-10	1.21337e-08	0.814036	0.334352	2.54698	186	c("SFRP4", "ST8SIA2", "FRZB", "FZD2", "EPHA3", "NTNG2", "COL9A1", "DPYSL3", "FARP1", "AGRN", "ENAH", "PAK1", "HFE2", "CHN1", "CNTN4", "COL9A2", "SH3GL2", "MYH11", "SCN3B", "BRSK1", "COL1A2", "S100A6", "ST8SIA4", "MYH10", "FYN", "UNC5B", "DOCK1", "PTPN11", "EVL", "KAL1", "FZD1", "MAP2", "SPTBN1", "MYO10", "DLG4", "LGI1", "SHANK1", "FZD7", "SEMA6A", "FOXD2", "APOD", "EPHB3", "COL3A1", "ARHGEF12", "…
91	NEGATIVE REGULATION OF RESPONSE TO STIMULUS%GO%GO:0048585	3.72149e-10	1.21337e-08	0.814036	0.30295	2.41884	259	c("SFRP4", "FRZB", "HTR2B", "SNCA", "SULF1", "THY1", "IGFBP5", "SFRP1", "PIK3IP1", "BMP4", "UCHL1", "ESR1", "DKK2", "RGS4", "APOE", "STK38L", "IGFBP3", "LEF1", "TGFB2", "IFIT1", "SH3GL2", "GLI1", "CILP", "APOA1", "BCL2", "MASP1", "ADAMTSL2", "UNC5B", "KANK1", "DACT3", "SULF2", "PRICKLE1", "WTIP", "FZD1", "DACT2", "MAP2K5", "PPP1R15A", "SOX9", "CXXC4", "DAND5", "CNKSR3", "TNIP1", "APOD", "BTRC", "…
92	SIGNALING RECEPTOR ACTIVITY%GO%GO:0038023	3.99715e-10	1.28908e-08	0.814036	0.311489	2.4579	240	c("SFRP4", "FRZB", "GRIA3", "HTR2B", "FZD2", "KIT", "NPR3", "ANTXR1", "EPHA3", "SFRP1", "EDNRA", "ESR1", "GRM1", "LEF1", "CX3CR1", "PTPRR", "DRD4", "CHRNA3", "NTRK2", "LEPR", "LTBP4", "LPAR4", "ELOVL4", "COLEC12", "CRIM1", "DDR1", "BCAM", "PTPRN2", "SCARB1", "CXCR4", "PTPRD", "LPHN3", "EDA2R", "FZD1", "CD47", "P2RY14", "DLG4", "LRP5", "XPR1", "HPGD", "FZD7", "CXCR7", "GRIA1", "SORT1", "TNFRSF25",…
93	ACTIN CYTOSKELETON%GO%GO:0015629	4.27302e-10	1.36323e-08	0.814036	0.386171	2.74733	123	c("TNNT1", "SNCA", "PLEKHH2", "TNNT3", "DPYSL3", "MYL1", "STK38L", "AMPH", "PAK1", "FSCN1", "BFSP1", "IQGAP2", "MYL7", "TPM3", "MYH10", "SORBS2", "PKD2", "ANKRD23", "APBB3", "SVIL", "LIMA1", "MYL5", "AFAP1", "MARCKS", "PDLIM7", "TNNI3", "IFIT5", "AMOT", "DENND2A", "CALD1", "SPTAN1", "VCAM1", "LLGL1", "SH3PXD2A", "IPP", "NEB", "KALRN", "CLIC5", "TSC1", "SHROOM2", "CDC42EP3", "ACTN2", "DST", "HIST1…
94	CARDIOVASCULAR SYSTEM DEVELOPMENT%GO%GO:0072358	5.12059e-10	1.59924e-08	0.801216	0.340442	2.56926	178	c("SFRP4", "FRZB", "HTR2B", "FZD2", "PLCE1", "SOX4", "THY1", "SFRP1", "BMP4", "CPE", "LEF1", "TGFB2", "HDAC9", "FOXS1", "MYH11", "SCG2", "ESM1", "COL1A2", "PCSK5", "CRIP1", "PLXDC1", "PKD2", "MCAM", "ANKRD1", "FOXC2", "PTPN11", "MYOCD", "FZD1", "LRP5", "SOX9", "DAND5", "HPGD", "FZD7", "GPR124", "TNNI3", "ATPIF1", "JAM3", "APOD", "EPHB3", "COL3A1", "RAMP2", "PTPN14", "SMO", "GATA6", "TCF7L2", "ROB…
95	CIRCULATORY SYSTEM DEVELOPMENT%GO%GO:0072359	5.12059e-10	1.59924e-08	0.801216	0.340442	2.56926	178	c("SFRP4", "FRZB", "HTR2B", "FZD2", "PLCE1", "SOX4", "THY1", "SFRP1", "BMP4", "CPE", "LEF1", "TGFB2", "HDAC9", "FOXS1", "MYH11", "SCG2", "ESM1", "COL1A2", "PCSK5", "CRIP1", "PLXDC1", "PKD2", "MCAM", "ANKRD1", "FOXC2", "PTPN11", "MYOCD", "FZD1", "LRP5", "SOX9", "DAND5", "HPGD", "FZD7", "GPR124", "TNNI3", "ATPIF1", "JAM3", "APOD", "EPHB3", "COL3A1", "RAMP2", "PTPN14", "SMO", "GATA6", "TCF7L2", "ROB…
96	CELLULAR RESPONSE TO ORGANIC SUBSTANCE%GO%GO:0071310	5.26354e-10	1.62676e-08	0.801216	0.260964	2.19773	440	c("FMOD", "KIT", "SNCA", "MME", "SOX4", "EPHA3", "SOCS2", "IGFBP5", "SFRP1", "JAK2", "BMP4", "DPYSL3", "PDE1A", "GDF10", "CRHBP", "RUNX2", "LEF1", "CX3CR1", "LEFTY2", "TGFB2", "GDF15", "IFIT2", "HERC5", "GNB3", "HDAC9", "APLP1", "IFIT1", "NTRK2", "SH3GL2", "FOXS1", "TGFB3", "FGF1", "FGF18", "COLEC12", "ATP6V1G2", "COL1A2", "RNASEL", "PCSK5", "PDE1C", "NET1", "PIK3R1", "TIAM2", "KDELR3", "SCARB1",…
97	MACROMOLECULE LOCALIZATION%GO%GO:0033036	5.42184e-10	1.65841e-08	0.801216	0.279581	2.29898	343	c("CENPA", "JAK2", "BMP4", "NDC80", "CPE", "APOE", "AGRN", "NRXN2", "DRD4", "TGFB2", "IFIT1", "RASSF9", "SLC27A6", "ACE", "SCG2", "SCN3B", "ATP6V1G2", "APOA1", "PCSK5", "MAP4", "COPZ2", "PKD2", "KIF13A", "RPS4Y1", "SCG5", "PACS1", "CAPN3", "SCARB1", "DDX42", "S100A13", "PRICKLE1", "PDIA2", "RAB26", "CLIP3", "PPP1R10", "SPTBN1", "DLG4", "NUSAP1", "APOM", "SHANK1", "RTP4", "FGF13", "APOD", "BTN3A1"…
98	NEGATIVE REGULATION OF CELL COMMUNICATION%GO%GO:0010648	6.05504e-10	1.81468e-08	0.801216	0.309873	2.43745	234	c("SFRP4", "FRZB", "HTR2B", "SNCA", "SULF1", "THY1", "IGFBP5", "SFRP1", "PIK3IP1", "BMP4", "UCHL1", "ESR1", "DKK2", "RGS4", "APOE", "STK38L", "IGFBP3", "LEF1", "SH3GL2", "GLI1", "CILP", "APOA1", "BCL2", "ADAMTSL2", "UNC5B", "KANK1", "DACT3", "SULF2", "PRICKLE1", "WTIP", "FZD1", "DACT2", "PLK2", "PPP1R15A", "SOX9", "CXXC4", "DAND5", "CNKSR3", "TNIP1", "APOD", "BTRC", "BAMBI", "GRB10", "BICD1", "UB…
99	NEGATIVE REGULATION OF CELLULAR BIOSYNTHETIC PROCESS%GO%GO:0031327	6.05504e-10	1.81468e-08	0.801216	0.276494	2.27709	348	c("IGFBP5", "TNFRSF4", "SFRP1", "BMP4", "MDFIC", "TCEAL7", "RUNX2", "LEF1", "DRD4", "CRYM", "HDAC9", "APLP1", "FOXS1", "TGFB3", "ACADL", "ARID5A", "PRMT2", "ZEB1", "ENC1", "PER2", "SOX15", "SOX8", "CAPN3", "ANKRD1", "FOXC2", "CBX7", "EIF4EBP3", "PRICKLE1", "NAB1", "MAP2K5", "NR2F1", "SOX9", "SOX7", "SAMD4A", "ZNF425", "ING4", "MDM4", "INHBA", "BTRC", "GRB10", "HMGB2", "CRY2", "TRIM33", "PLK3", "M…
100	REGULATION OF SYSTEM PROCESS%GO%GO:0044057	6.44895e-10	1.9134e-08	0.801216	0.386716	2.72877	118	c("TNNT1", "KCNA5", "PLCE1", "SNCA", "TNNT3", "SCN2B", "SNCAIP", "APOE", "CRHBP", "ACE2", "DRD4", "KCNE1", "TGFB2", "CNTN4", "CHRNA3", "ACE", "CYP2J2", "SCN3B", "SCN4B", "USP46", "TPM3", "SIPA1L1", "SLC30A1", "CAMK2B", "KCNMB4", "NPPB", "MYOCD", "MYL5", "DLG4", "EPHX2", "PLK2", "LGI1", "KCNMB2", "INHBA", "IGF1", "EDN3", "CAMK2G", "BMPR2", "CSRP3", "HDAC4", "DAPK3", "CAV3", "MEF2C", "ASPH", "CDK5"…
101	NEURON PART%GO%GO:0097458	6.81504e-10	1.9821e-08	0.801216	0.372999	2.66529	127	c("SFRP4", "FRZB", "FZD2", "SNCA", "MME", "THY1", "DPYSL3", "FARP1", "SNCAIP", "APOE", "CRHBP", "PAK1", "TGFB2", "CNTN4", "CHRNA3", "DIXDC1", "EFHC1", "APBB2", "SIPA1L1", "FZD1", "SPTBN1", "DLG4", "PLK2", "SHANK1", "FRMPD4", "FGF13", "FZD7", "SEMA6A", "GRIA1", "APOD", "DPF3", "SMARCA2", "SMO", "NCDN", "P2RY1", "SARM1", "ALS2", "LLGL1", "FZD6", "SMARCC2", "ADCY2", "SYNM", "ACTN2", "DST", "NLGN4X",…
102	CHEMOTAXIS%GO%GO:0006935	6.88091e-10	1.9821e-08	0.801216	0.336829	2.52211	171	c("ST8SIA2", "KIT", "ENPP2", "COL9A1", "BMP4", "DPYSL3", "AGRN", "LEF1", "ENAH", "PAK1", "HFE2", "TGFB2", "CHN1", "CNTN4", "COL9A2", "SH3GL2", "MYH11", "SCG2", "SCN3B", "COL1A2", "ST8SIA4", "MYH10", "FYN", "UNC5B", "VEGFC", "DOCK1", "CXCR4", "PTPN11", "EVL", "KAL1", "SPTBN1", "MYO10", "DLG4", "LGI1", "SEMA6A", "FOXD2", "EPHB3", "HMGB2", "COL3A1", "EDN3", "ARHGEF12", "ANK1", "FEZ1", "TRPM4", "SMO"…
103	TAXIS%GO%GO:0042330	6.88091e-10	1.9821e-08	0.801216	0.336829	2.52211	171	c("ST8SIA2", "KIT", "ENPP2", "COL9A1", "BMP4", "DPYSL3", "AGRN", "LEF1", "ENAH", "PAK1", "HFE2", "TGFB2", "CHN1", "CNTN4", "COL9A2", "SH3GL2", "MYH11", "SCG2", "SCN3B", "COL1A2", "ST8SIA4", "MYH10", "FYN", "UNC5B", "VEGFC", "DOCK1", "CXCR4", "PTPN11", "EVL", "KAL1", "SPTBN1", "MYO10", "DLG4", "LGI1", "SEMA6A", "FOXD2", "EPHB3", "HMGB2", "COL3A1", "EDN3", "ARHGEF12", "ANK1", "FEZ1", "TRPM4", "SMO"…
104	NUCLEIC ACID BINDING%GO%GO:0003676	7.87549e-10	2.24679e-08	0.801216	0.251279	2.12976	467	c("SOX4", "ESR1", "MEOX2", "TCF4", "HMGN2", "LEF1", "HIST1H2AC", "IFIT1", "MYCN", "FOXS1", "AFF3", "GLI1", "LHFP", "ZEB1", "DBP", "RNASEL", "RAD51AP1", "BCL2", "APOBEC3G", "CRIP1", "SOX15", "PLAGL1", "SOX8", "RPS4Y1", "HLF", "GATA5", "ANKRD1", "FOXC2", "PIF1", "MCM2", "APOBEC3F", "MYOCD", "XPC", "HESX1", "NR2F1", "PIWIL4", "IRF6", "HR", "SOX9", "SOX7", "LMO2", "DDX60", "SSBP2", "FOXD2", "RARB", "…
105	NEGATIVE REGULATION OF SIGNAL TRANSDUCTION%GO%GO:0009968	8.82919e-10	2.49488e-08	0.801216	0.312461	2.45165	229	c("SFRP4", "FRZB", "HTR2B", "SNCA", "SULF1", "THY1", "IGFBP5", "SFRP1", "PIK3IP1", "BMP4", "UCHL1", "ESR1", "DKK2", "RGS4", "APOE", "STK38L", "IGFBP3", "LEF1", "SH3GL2", "GLI1", "CILP", "APOA1", "BCL2", "ADAMTSL2", "UNC5B", "KANK1", "DACT3", "SULF2", "PRICKLE1", "WTIP", "FZD1", "DACT2", "PPP1R15A", "SOX9", "CXXC4", "DAND5", "CNKSR3", "TNIP1", "APOD", "BTRC", "BAMBI", "GRB10", "BICD1", "UBR1", "TR…
106	INTEGRAL TO PLASMA MEMBRANE%GO%GO:0005887	9.78367e-10	2.7385e-08	0.788187	0.261063	2.17504	396	c("KCNA5", "GRIA3", "NPR3", "MME", "F2RL2", "EPHA3", "THY1", "ENPP2", "TNFRSF4", "GPA33", "EDNRA", "SCN2B", "JAM2", "TM7SF2", "KCNT2", "PTGFR", "GRM1", "SGCE", "CX3CR1", "DRD4", "KCNE1", "GABRE", "KCNMA1", "ATP1B4", "HBEGF", "CHRNA3", "NTRK2", "SLC16A4", "GLRB", "TRO", "GABRB1", "LPAR4", "ABCC8", "SCN3B", "SCN4B", "PCDH12", "APLNR", "GPC6", "TNFSF10", "DDR1", "FLRT2", "SLC40A1", "PKD2", "ITGA8", …
107	RESPONSE TO GROWTH FACTOR STIMULUS%GO%GO:0070848	9.99266e-10	2.77086e-08	0.788187	0.341913	2.57239	175	c("FMOD", "SFRP1", "PDE1A", "GDF10", "RUNX2", "LEFTY2", "TGFB2", "GDF15", "NTRK2", "SH3GL2", "TGFB3", "FGF1", "FGF18", "COL1A2", "PCSK5", "PDE1C", "NET1", "PIK3R1", "TIAM2", "ANKRD1", "ARHGEF3", "USP9Y", "PTPN11", "MCF2", "MAPK12", "MAP2K5", "PPP1R15A", "SOX9", "HPGD", "SORT1", "COL3A1", "RAMP2", "RICTOR", "GAB1", "TRIM33", "ARHGEF12", "KIDINS220", "SOX6", "TPR", "GATA6", "NRP1", "CEP57", "ARHGEF…
108	ANION BINDING%GO%GO:0043168	1.15336e-09	3.14259e-08	0.788187	0.294991	2.38029	279	c("THBS4", "ST8SIA2", "COMP", "POSTN", "PDE5A", "SERPINE2", "SNCA", "CFH", "SYTL2", "MDK", "SFRP1", "PLEKHA4", "DPYSL3", "APOE", "STK38L", "AGRN", "NOX4", "HBEGF", "GLRB", "FGF1", "COL13A1", "ACE", "ICK", "BRSK1", "ST8SIA4", "MYH10", "LCN12", "SNRK", "PIK3R1", "SCG5", "SCARB1", "PCOLCE2", "PIF1", "RAB26", "CBR3", "MYO10", "GAB2", "PDK3", "TNIK", "TSSK6", "HPGD", "FRMPD4", "SDPR", "TP53I3", "UBR1"…
109	NEURON DEVELOPMENT%GO%GO:0048666	1.15451e-09	3.14259e-08	0.788187	0.320709	2.48242	211	c("SFRP4", "ST8SIA2", "FRZB", "FZD2", "EPHA3", "THY1", "NTNG2", "COL9A1", "DPYSL3", "FARP1", "AGRN", "ENAH", "PAK1", "HFE2", "TGFB2", "CHN1", "CNTN4", "COL9A2", "NTRK2", "SH3GL2", "MYH11", "SCN3B", "BRSK1", "PCDH12", "COL1A2", "S100A6", "ST8SIA4", "MYH10", "FYN", "UNC5B", "DOCK1", "PTPN11", "EVL", "KAL1", "FZD1", "MAP2", "SPTBN1", "MYO10", "DLG4", "LGI1", "SHANK1", "FZD7", "SEMA6A", "FOXD2", "APO…
110	NEUROLOGICAL SYSTEM PROCESS%GO%GO:0050877	1.21699e-09	3.28255e-08	0.788187	0.283163	2.29184	297	c("KCNA5", "GRIA3", "PROM1", "KIT", "SNCA", "MME", "SLC26A4", "MBP", "SCN2B", "KCNN3", "SLC6A1", "APOE", "AGRN", "AP3M2", "CRHBP", "GRM1", "ACE2", "BDNF", "KCNMB1", "DRD4", "AMPH", "KCNE1", "CRYM", "KCNMA1", "GNB3", "CHRNA3", "NTRK2", "FOXS1", "GUCA1C", "GLRB", "GABRB1", "KCNS3", "ABCC8", "BRSK1", "CDH23", "TTC8", "KCNAB1", "RAPSN", "FYN", "KCNA4", "KCNC4", "KCNK6", "CXCR4", "CAMK2B", "KCNMB4", "…
111	REGULATION OF NERVOUS SYSTEM DEVELOPMENT%GO%GO:0051960	1.233e-09	3.29578e-08	0.788187	0.391687	2.7462	113	c("SERPINE2", "EPHA3", "THY1", "DPYSL3", "APOE", "AGRN", "BDNF", "TCF4", "CHN1", "CNTN4", "CHRNA3", "NTRK2", "ZEB1", "DIXDC1", "SOX8", "KANK1", "SIPA1L1", "CXCR4", "CAMK2B", "PTPRD", "SERPINF1", "LRRC4C", "SOX9", "TNIK", "FGF13", "EPHB3", "SDC2", "SMO", "SARM1", "VWC2", "ROBO1", "PRKD1", "ISLR2", "RTN4R", "NPHP3", "ID2", "DVL2", "MEF2C", "CDK5", "DVL3", "CDK5RAP2", "PACSIN1", "MAPT", "CBFA2T2", "…
112	REGULATION OF NUCLEOTIDE METABOLIC PROCESS%GO%GO:0006140	1.34175e-09	3.55444e-08	0.788187	0.389132	2.74717	117	c("FZD2", "EPHA3", "THY1", "SFRP1", "EDNRA", "TNNT3", "RGS4", "APOE", "AGRN", "DRD4", "APLP1", "RGS11", "NTRK2", "RGS5", "RABGAP1L", "PKD2", "NET1", "SIPA1L1", "DOCK1", "ALDH1A1", "RGS17", "ALS2CR12", "TNNI3", "EPHB3", "RGS6", "RAMP2", "PTHLH", "RALBP1", "RABGAP1", "ALS2", "NTF3", "RAPGEF6", "LLGL1", "CHN2", "PLCB1", "ADORA2B", "FGD5", "TSC1", "RGN", "LHCGR", "RASAL2", "TAX1BP3", "GABARAPL2", "VI…
113	CELL CYCLE%GO%GO:0007049	1.37607e-09	3.6131e-08	0.788187	0.277892	2.26752	318	c("SOX4", "HSPA2", "CCND1", "CENPA", "NDC80", "CCNG2", "TGFB2", "WEE1", "TPD52L1", "BRSK1", "MYH10", "MAP4", "PLAGL1", "NES", "PKD2", "APBB2", "CKAP2", "REC8", "OSGIN2", "MCM2", "LIN9", "XPC", "MAPK12", "SPTBN1", "TP53INP1", "PLK2", "IRF6", "NUSAP1", "PPP1R15A", "CRADD", "ING4", "WNT9A", "INHBA", "BTRC", "PLK3", "CETN3", "NCAPD3", "MPHOSPH8", "GINS2", "CYP26B1", "TPR", "DYNLL1", "CEP57", "TCF7L2"…
114	NEGATIVE REGULATION OF SIGNALING%GO%GO:0023057	1.42379e-09	3.70561e-08	0.788187	0.307736	2.42212	233	c("SFRP4", "FRZB", "HTR2B", "SNCA", "SULF1", "THY1", "IGFBP5", "SFRP1", "PIK3IP1", "BMP4", "UCHL1", "ESR1", "DKK2", "RGS4", "APOE", "STK38L", "IGFBP3", "LEF1", "SH3GL2", "GLI1", "CILP", "APOA1", "BCL2", "ADAMTSL2", "UNC5B", "KANK1", "DACT3", "SULF2", "PRICKLE1", "WTIP", "FZD1", "DACT2", "PLK2", "PPP1R15A", "SOX9", "CXXC4", "DAND5", "CNKSR3", "TNIP1", "APOD", "BTRC", "BAMBI", "GRB10", "BICD1", "UB…
115	EMBRYO DEVELOPMENT%GO%GO:0009790	1.57325e-09	4.05899e-08	0.788187	0.355324	2.62427	154	c("SFRP4", "FRZB", "HTR2B", "FZD2", "KIT", "SOX4", "SULF1", "SFRP1", "BMP4", "ALDH1A2", "LEF1", "PTPRR", "TGFB2", "FOXS1", "TGFB3", "AFF3", "PCSK5", "SOX8", "NES", "PKD2", "FOXC2", "SULF2", "PRICKLE1", "EDA2R", "FZD1", "LRP5", "SOX9", "CXXC4", "SOX7", "WNT9A", "FOXD2", "RARB", "FOXI2", "IRX5", "RICTOR", "CYP26B1", "SMO", "ARNT2", "DACT1", "BBS4", "PKD1", "BMPR2", "CEP290", "STIL", "FZD6", "SFRP2"…
116	LIPID METABOLIC PROCESS%GO%GO:0006629	1.67864e-09	4.29355e-08	0.788187	0.279383	2.27786	316	c("ST8SIA2", "HTR2B", "PLCE1", "ENPP2", "ALDH1A2", "APOE", "SLC44A5", "TM7SF2", "ST8SIA5", "ARSJ", "ORMDL3", "SLC27A6", "ACADL", "HSD17B14", "ELOVL4", "CYP2J2", "APOA1", "PAFAH2", "INPP4B", "ST8SIA4", "PIK3R1", "TIAM2", "SCARB1", "ANKRD1", "LTC4S", "CYP11A1", "RGL1", "SLC44A1", "EPHX2", "ALDH5A1", "AGPAT4", "HPGD", "PIK3C2B", "ASAH1", "APOD", "LIPT1", "ARSD", "COL4A3BP", "CPT2", "MBOAT2", "CYP46A…
117	VESICLE%GO%GO:0031982	1.8385e-09	4.66226e-08	0.788187	0.306183	2.4099	233	c("GRIA3", "SERPINE2", "SNCA", "MME", "PROS1", "SYTL2", "EDIL3", "DPYSL3", "SGIP1", "CPE", "CRHBP", "MYOC", "LEFTY2", "AMPH", "TGFB2", "SH3GL2", "TGFB3", "RASSF9", "DPP4", "RAB23", "BRSK1", "COL1A2", "APOA1", "PCSK5", "CA4", "COPZ2", "VEGFC", "TYRP1", "MYO5B", "SCG5", "SSPN", "CXCR4", "CAMK2B", "RAB26", "LAMA4", "VAMP1", "DLG4", "CXXC4", "GSN", "VPS41", "SYTL1", "MYRIP", "GRIA1", "BAIAP2L2", "SOR…
118	NEGATIVE REGULATION OF MACROMOLECULE BIOSYNTHETIC PROCESS%GO%GO:0010558	1.87048e-09	4.70314e-08	0.774939	0.276005	2.26305	334	c("IGFBP5", "TNFRSF4", "SFRP1", "BMP4", "MDFIC", "TCEAL7", "RUNX2", "LEF1", "CRYM", "HDAC9", "FOXS1", "TGFB3", "ARID5A", "PRMT2", "ZEB1", "ENC1", "PER2", "SOX15", "SOX8", "CAPN3", "ANKRD1", "FOXC2", "CBX7", "EIF4EBP3", "PRICKLE1", "NAB1", "MAP2K5", "NR2F1", "SOX9", "SOX7", "SAMD4A", "ZNF425", "ING4", "MDM4", "INHBA", "BTRC", "GRB10", "HMGB2", "CRY2", "TRIM33", "PLK3", "MPHOSPH8", "KLF12", "SMARCA…
119	INTRINSIC TO PLASMA MEMBRANE%GO%GO:0031226	1.93442e-09	4.82305e-08	0.774939	0.260093	2.18005	414	c("KCNA5", "GRIA3", "NPR3", "MME", "F2RL2", "EPHA3", "THY1", "NTNG2", "ENPP2", "TNFRSF4", "GPA33", "EDNRA", "SCN2B", "JAM2", "TM7SF2", "KCNT2", "PTGFR", "GRM1", "SGCE", "CX3CR1", "DRD4", "KCNE1", "GABRE", "KCNMA1", "ATP1B4", "HBEGF", "CHRNA3", "NTRK2", "SLC16A4", "GLRB", "TRO", "GABRB1", "LPAR4", "ABCC8", "SCN3B", "SCN4B", "PCDH12", "APLNR", "GPC6", "TNFSF10", "DDR1", "FLRT2", "CA4", "SLC40A1", "…
120	REGULATION OF LOCOMOTION%GO%GO:0040012	2.06852e-09	5.1144e-08	0.774939	0.345353	2.56342	161	c("THBS4", "SERPINE2", "SULF1", "THY1", "ENPP2", "IGFBP5", "SFRP1", "BMP4", "DPYSL3", "PODN", "APOE", "IGFBP3", "LEF1", "TGFB2", "HDAC9", "HBEGF", "FGF1", "ACE", "SCG2", "VEGFC", "KANK1", "SCARB1", "FOXC2", "CXCR4", "MAP2K5", "TP53INP1", "SOX9", "GPR124", "JAM3", "APOD", "AMOT", "IGF1", "EDN3", "NRP1", "RNF20", "THBS3", "ROBO1", "NTF3", "NEXN", "BBS4", "BMPR2", "PTGER4", "VTN", "PTPRM", "PLCB1", …
121	REGULATION OF SMALL GTPASE MEDIATED SIGNAL TRANSDUCTION%GO%GO:0051056	2.12185e-09	5.171e-08	0.774939	0.393184	2.70748	104	c("PLCE1", "EPHA3", "SFRP1", "ARHGAP24", "APOE", "AGRN", "RHOBTB1", "CHN1", "ARHGAP28", "NTRK2", "APOA1", "RABGAP1L", "KANK1", "NET1", "TIAM2", "SIPA1L1", "ALDH1A1", "ARHGEF3", "ARHGAP1", "ARHGAP19", "MCF2", "EPHB3", "IGF1", "ARHGEF12", "RALBP1", "ALS2", "ARHGEF4", "NTF3", "LLGL1", "CHN2", "KALRN", "AKAP13", "MFN2", "ARHGEF9", "FGD5", "TSC1", "SRGAP3", "RASAL2", "OBSCN", "TAX1BP3", "SOS2", "SYNGA…
122	CELLULAR CATABOLIC PROCESS%GO%GO:0044248	2.12626e-09	5.171e-08	0.774939	0.247797	2.10241	471	c("FMOD", "PDE5A", "OGN", "ENPP2", "LUM", "SFRP1", "SPATA18", "OMD", "HERC5", "GNB3", "DDAH1", "ACADL", "ASPA", "ACE", "RAB23", "TPD52L1", "PRELP", "ENC1", "APOBEC3G", "HECW2", "UBE2H", "CDO1", "RPS4Y1", "RENBP", "CSAD", "NT5C2", "APOBEC3F", "PXDNL", "XPC", "HERC6", "FBXL14", "RNF103", "GNG11", "EPHX2", "ALDH5A1", "RNF217", "TP53INP2", "GZMA", "ALDH4A1", "BTRC", "ATXN3", "HMGB2", "PRTFDC1", "CPT2…
123	REGULATION OF PROTEIN LOCALIZATION%GO%GO:0032880	2.17782e-09	5.19868e-08	0.774939	0.373046	2.65395	123	c("HTR2B", "TMEM30B", "SOX4", "SLC26A4", "TNFRSF4", "BMP4", "MDFIC", "DRD4", "TGFB2", "XPO4", "TGFB3", "RAB23", "APOA1", "RABGAP1L", "RSAD2", "KANK1", "PKD2", "DACT3", "PIK3R1", "ANKRD1", "IL33", "CLIP3", "FZD7", "SCAMP5", "APOD", "BAMBI", "IGF1", "HLA-DRB1", "BMP6", "PTPN14", "TPR", "TCF7L2", "CADM1", "DACT1", "DYRK2", "PKD1", "PTGER4", "NLRP1", "WWP2", "KIF5B", "ACTN2", "MYO1C", "AR", "ASPH", "…
124	NEGATIVE REGULATION OF CELLULAR MACROMOLECULE BIOSYNTHETIC PROCESS%GO%GO:2000113	2.19021e-09	5.19868e-08	0.774939	0.27522	2.2504	325	c("IGFBP5", "TNFRSF4", "SFRP1", "BMP4", "MDFIC", "TCEAL7", "RUNX2", "LEF1", "CRYM", "HDAC9", "FOXS1", "TGFB3", "ARID5A", "PRMT2", "ZEB1", "ENC1", "PER2", "SOX15", "SOX8", "CAPN3", "ANKRD1", "FOXC2", "CBX7", "EIF4EBP3", "PRICKLE1", "NAB1", "MAP2K5", "NR2F1", "SOX9", "SOX7", "SAMD4A", "ZNF425", "ING4", "MDM4", "BTRC", "GRB10", "HMGB2", "CRY2", "TRIM33", "PLK3", "MPHOSPH8", "KLF12", "SMARCA2", "TPR"…
125	REGULATION OF PHOSPHORYLATION%GO%GO:0042325	2.19021e-09	5.19868e-08	0.774939	0.288438	2.32272	275	c("THBS4", "HTR2B", "PLCE1", "KIT", "SNCA", "THY1", "CCND1", "SFRP1", "PIK3IP1", "JAK2", "BMP4", "UCHL1", "MDFIC", "RGS4", "APOE", "STK38L", "IGFBP3", "DRD4", "PAK1", "TGFB2", "HERC5", "CHRNA3", "TGFB3", "GADD45A", "CCND2", "TPD52L1", "PKD2", "PIK3R1", "KDELR3", "CXCR4", "CLIP3", "MYOCD", "PELI2", "MAP2K5", "LRP5", "SOX9", "TNIK", "CNKSR3", "FGF13", "FZD7", "GFPT1", "INHBA", "GRB10", "IGF1", "EDN…
126	REGULATION OF CELLULAR PROTEIN METABOLIC PROCESS%GO%GO:0032268	2.35008e-09	5.53387e-08	0.774939	0.25577	2.13541	404	c("DIO2", "THBS4", "HTR2B", "PLCE1", "KIT", "SERPINE2", "SNCA", "SOX4", "THY1", "IGFBP5", "CCND1", "SFRP1", "JAK2", "BMP4", "UCHL1", "MDFIC", "RGS4", "APOE", "STK38L", "IGFBP3", "DRD4", "PLAT", "PAK1", "TGFB2", "HERC5", "CHRNA3", "TGFB3", "GADD45A", "CCND2", "TPD52L1", "ENC1", "PKD2", "KDELR3", "CAPN3", "PTPN3", "CXCR4", "EIF4EBP3", "PRICKLE1", "CLIP3", "MYOCD", "PELI2", "MAP2K5", "PERP", "LRP5",…
127	REGULATION OF NEUROGENESIS%GO%GO:0050767	2.48321e-09	5.80132e-08	0.774939	0.402592	2.76008	102	c("SERPINE2", "EPHA3", "THY1", "DPYSL3", "APOE", "TCF4", "CHN1", "CNTN4", "CHRNA3", "NTRK2", "ZEB1", "DIXDC1", "SOX8", "KANK1", "SIPA1L1", "CXCR4", "CAMK2B", "PTPRD", "SERPINF1", "LRRC4C", "SOX9", "TNIK", "FGF13", "EPHB3", "SDC2", "SMO", "SARM1", "VWC2", "ROBO1", "PRKD1", "ISLR2", "RTN4R", "ID2", "MEF2C", "CDK5", "CDK5RAP2", "PACSIN1", "MAPT", "CBFA2T2", "NLGN1", "COBL", "ITM2C", "PROX1", "HES5",…
128	CARBOHYDRATE DERIVATIVE BINDING%GO%GO:0097367	2.65542e-09	6.15519e-08	0.774939	0.553295	2.95903	39	c("THBS4", "ST8SIA2", "COMP", "POSTN", "SERPINE2", "CFH", "MDK", "SFRP1", "DPYSL3", "APOE", "AGRN", "HBEGF", "FGF1", "LTBP4", "COL13A1", "ST8SIA4", "CHODL", "PCOLCE2", "PODXL2")
129	MICROTUBULE CYTOSKELETON%GO%GO:0015630	2.73376e-09	6.28764e-08	0.774939	0.281259	2.28487	305	c("CRHBP", "MAP1A", "EVC", "HSD17B14", "MAP6", "BRSK1", "IQGAP2", "TTC8", "MAP4", "KLHL4", "PKD2", "KIF13A", "MID1", "CKAP2", "TCEA2", "DNALI1", "WDR62", "DYNC1LI2", "MAP2", "RAB11FIP3", "PLK2", "RECQL", "DBC1", "THAP6", "DYNC2LI1", "DNAH1", "FGF13", "LRRCC1", "AK5", "BICD1", "ZNF415", "KIF3C", "DZIP1", "PLK3", "NIN", "CETN3", "FEZ1", "MAPRE2", "TCP11L1", "TPR", "SPTAN1", "FBXO40", "RABGAP1", "SA…
130	REGULATION OF PROTEIN PHOSPHORYLATION%GO%GO:0001932	2.82968e-09	6.43221e-08	0.774939	0.296273	2.36608	256	c("THBS4", "HTR2B", "PLCE1", "KIT", "SNCA", "THY1", "CCND1", "SFRP1", "JAK2", "BMP4", "UCHL1", "MDFIC", "RGS4", "APOE", "STK38L", "IGFBP3", "DRD4", "PAK1", "TGFB2", "HERC5", "CHRNA3", "TGFB3", "GADD45A", "CCND2", "TPD52L1", "PKD2", "KDELR3", "CXCR4", "CLIP3", "MYOCD", "PELI2", "MAP2K5", "LRP5", "SOX9", "TNIK", "CNKSR3", "FGF13", "GFPT1", "INHBA", "IGF1", "EDN3", "FAM129A", "BMP6", "KIDINS220", "P…
131	MOLECULAR TRANSDUCER ACTIVITY%GO%GO:0060089	2.86165e-09	6.43221e-08	0.774939	0.275982	2.25165	317	c("SFRP4", "FRZB", "GRIA3", "HTR2B", "FZD2", "PLCE1", "KIT", "NPR3", "ANTXR1", "EPHA3", "SFRP1", "EDNRA", "ESR1", "GRM1", "LEF1", "CX3CR1", "PTPRR", "DRD4", "TGFB2", "CHRNA3", "NTRK2", "LEPR", "PRMT2", "TSPAN8", "LTBP4", "LPAR4", "ELOVL4", "COLEC12", "PLEKHB1", "CRIM1", "DDR1", "FLRT2", "BCAM", "CAPN3", "PTPRN2", "SCARB1", "CXCR4", "SMAD9", "PTPRD", "LPHN3", "EDA2R", "FZD1", "CD47", "P2RY14", "DL…
132	SIGNAL TRANSDUCER ACTIVITY%GO%GO:0004871	2.86165e-09	6.43221e-08	0.774939	0.275982	2.25165	317	c("SFRP4", "FRZB", "GRIA3", "HTR2B", "FZD2", "PLCE1", "KIT", "NPR3", "ANTXR1", "EPHA3", "SFRP1", "EDNRA", "ESR1", "GRM1", "LEF1", "CX3CR1", "PTPRR", "DRD4", "TGFB2", "CHRNA3", "NTRK2", "LEPR", "PRMT2", "TSPAN8", "LTBP4", "LPAR4", "ELOVL4", "COLEC12", "PLEKHB1", "CRIM1", "DDR1", "FLRT2", "BCAM", "CAPN3", "PTPRN2", "SCARB1", "CXCR4", "SMAD9", "PTPRD", "LPHN3", "EDA2R", "FZD1", "CD47", "P2RY14", "DL…
133	CONTRACTILE FIBER PART%GO%GO:0044449	2.97845e-09	6.64441e-08	0.774939	0.48693	2.91738	57	c("TNNT1", "TNNT3", "MYL1", "KCNE1", "PAK1", "SCN3B", "MYL7", "TPM3", "SORBS2", "CAPN3", "ANKRD1", "SVIL", "MYL5", "TNNI3", "NEXN", "NEB", "CSRP3", "SYNM", "ACTN2", "DST", "CAV3", "OBSCN", "MYOM1", "MYPN", "CACNA1D", "TNNI1", "SYNE2", "GCOM1", "KY", "TNNC2", "LDB3", "VCL", "MYL6B", "MYL9", "DMD", "HABP4", "RYR2", "CTNNB1", "SRI", "OBSL1", "MYOZ2", "SLC8A1", "PGM5", "DNAJB6", "CASQ2", "NEBL", "TNN…
134	CELL PROJECTION PART%GO%GO:0044463	3.08119e-09	6.82231e-08	0.774939	0.360635	2.60787	140	c("SFRP4", "FRZB", "FZD2", "PROM1", "SNCA", "ANTXR1", "MME", "THY1", "DPYSL3", "CC2D2A", "CRHBP", "EVC", "CHRNA3", "DPP4", "TTC8", "DIXDC1", "EFHC1", "CA4", "KANK1", "PKD2", "APBB2", "SIPA1L1", "DNALI1", "FZD1", "SPTBN1", "MYO10", "DLG4", "SHANK1", "DYNC2LI1", "DNAH1", "FRMPD4", "FGF13", "FZD7", "GRIA1", "IFIT5", "DZIP1", "P2RY1", "ALS2", "BBS4", "SPAG16", "CEP290", "SH3YL1", "FZD6", "ACTN2", "MA…
135	NEGATIVE REGULATION OF NUCLEOBASE-CONTAINING COMPOUND METABOLIC PROCESS%GO%GO:0045934	3.50238e-09	7.69745e-08	0.774939	0.274608	2.24463	323	c("TNFRSF4", "SFRP1", "BMP4", "MDFIC", "TCEAL7", "RUNX2", "LEF1", "DRD4", "CRYM", "HDAC9", "APLP1", "FOXS1", "TGFB3", "ARID5A", "PRMT2", "ZEB1", "PER2", "SOX15", "SOX8", "CAPN3", "ANKRD1", "FOXC2", "CBX7", "PRICKLE1", "NAB1", "MAP2K5", "NR2F1", "SOX9", "SOX7", "ZNF425", "ING4", "MDM4", "BTRC", "HMGB2", "CRY2", "TRIM33", "PLK3", "MPHOSPH8", "KLF12", "SMARCA2", "TPR", "GATA6", "DDIT3", "DNMT3B", "T…
136	REPRODUCTIVE STRUCTURE DEVELOPMENT%GO%GO:0048608	3.61201e-09	7.80644e-08	0.774939	0.512389	2.94139	49	c("SFRP4", "FRZB", "FZD2", "KIT", "SFRP1", "CRIP1", "SOX15", "SOX8", "PTPN11", "FZD1", "WNT2B", "SOX9", "FZD7", "INHBA", "IRX5", "SMO", "MAMLD1", "GATA6", "LRRC6", "MSH2", "PKD1", "FZD6", "SFRP2", "LHCGR", "AR", "FGFR2", "TBX3", "FZD3", "FGF9")
137	REPRODUCTIVE SYSTEM DEVELOPMENT%GO%GO:0061458	3.61201e-09	7.80644e-08	0.774939	0.512389	2.94139	49	c("SFRP4", "FRZB", "FZD2", "KIT", "SFRP1", "CRIP1", "SOX15", "SOX8", "PTPN11", "FZD1", "WNT2B", "SOX9", "FZD7", "INHBA", "IRX5", "SMO", "MAMLD1", "GATA6", "LRRC6", "MSH2", "PKD1", "FZD6", "SFRP2", "LHCGR", "AR", "FGFR2", "TBX3", "FZD3", "FGF9")
138	TRANSFERASE ACTIVITY%GO%GO:0016740	3.6309e-09	7.80644e-08	0.774939	0.249885	2.10686	443	c("ST8SIA2", "GATM", "QPCT", "KIT", "EPHA3", "JAK2", "STK38L", "ST8SIA5", "GSTM5", "PAK1", "TGFB2", "CHST6", "NTRK2", "PRMT2", "LTBP4", "WEE1", "DYRK1B", "ICK", "BRSK1", "CRIM1", "ST8SIA4", "INMT", "NMNAT2", "DDR1", "FYN", "B3GNT2", "EXT1", "SNRK", "HAS3", "NT5C2", "N6AMT1", "LTC4S", "ST6GALNAC1", "MAPK12", "MAP2K5", "PLK2", "SOX9", "PDK3", "AGPAT4", "TNIK", "TSSK6", "ST6GAL2", "PIK3C2B", "AK5", …
139	SKELETAL SYSTEM DEVELOPMENT%GO%GO:0001501	3.77435e-09	8.05646e-08	0.761461	0.40175	2.73371	98	c("AEBP1", "FRZB", "COMP", "POSTN", "FREM1", "NPR3", "SOX4", "SULF1", "COL10A1", "EXTL1", "BMP4", "GDF10", "EVC", "COL9A2", "FOXS1", "COL13A1", "RAB23", "PRELP", "COL1A2", "PCSK5", "EXT1", "FOXC2", "SULF2", "LRP5", "WNT2B", "SOX9", "WNT9A", "FOXD2", "IRX5", "IGF1", "BMP6", "CYP26B1", "SMO", "PTHLH", "PKD1", "PTGER4", "COL19A1", "FGF2", "SHOX2", "FGFR2", "TBX3", "MEF2C", "KIAA1217", "FGFR3")
140	ENDOPLASMIC RETICULUM%GO%GO:0005783	5.1732e-09	1.09635e-07	0.761461	0.270866	2.21167	319	c("COL14A1", "PROS1", "SULF1", "COL16A1", "THY1", "COL10A1", "PTN", "COL9A1", "CCDC3", "PDGFD", "COL21A1", "TM7SF2", "CRHBP", "ARSJ", "GSTM5", "ORMDL3", "IFIT2", "COL9A2", "FMO3", "COL13A1", "ELOVL4", "CYP2J2", "COL8A1", "COL24A1", "SV2A", "COL1A2", "APOA1", "BCL2", "RSAD2", "CA4", "LEPREL1", "PKD2", "EXT1", "KDELR3", "MAMDC2", "COL7A1", "RYR3", "SULF2", "COL8A2", "PDIA2", "RRAS2", "LTC4S", "RNF1…
141	CELLULAR LIPID METABOLIC PROCESS%GO%GO:0044255	5.23746e-09	1.1021e-07	0.761461	0.294014	2.34252	254	c("ST8SIA2", "HTR2B", "PLCE1", "ENPP2", "ALDH1A2", "APOE", "SLC44A5", "ST8SIA5", "ARSJ", "ORMDL3", "SLC27A6", "ACADL", "ELOVL4", "CYP2J2", "APOA1", "INPP4B", "ST8SIA4", "PIK3R1", "TIAM2", "ANKRD1", "LTC4S", "RGL1", "SLC44A1", "EPHX2", "ALDH5A1", "AGPAT4", "HPGD", "PIK3C2B", "ASAH1", "ARSD", "COL4A3BP", "CPT2", "MBOAT2", "DECR2", "CYP26B1", "ACOT4", "CPT1B", "PEX7", "HEXB", "GHR", "PLA2G4C", "BDH2…
142	SEX DIFFERENTIATION%GO%GO:0007548	6.15395e-09	1.28583e-07	0.761461	0.487466	2.86811	53	c("SFRP4", "FRZB", "FZD2", "KIT", "SFRP1", "SOX15", "SOX8", "PTPN11", "FZD1", "WNT2B", "SOX9", "FZD7", "INHBA", "IRX5", "SMO", "MAMLD1", "GATA6", "AMHR2", "LRRC6", "MSH2", "PKD1", "FZD6", "SFRP2", "LHCGR", "CBX2", "AR", "TBX3", "FZD3", "CDKL2", "FGF9")
143	CELLULAR RESPONSE TO GROWTH FACTOR STIMULUS%GO%GO:0071363	6.30344e-09	1.30785e-07	0.761461	0.334764	2.50801	172	c("FMOD", "SFRP1", "PDE1A", "GDF10", "RUNX2", "LEFTY2", "TGFB2", "GDF15", "NTRK2", "SH3GL2", "TGFB3", "FGF1", "FGF18", "COL1A2", "PCSK5", "PDE1C", "NET1", "PIK3R1", "TIAM2", "ANKRD1", "ARHGEF3", "USP9Y", "PTPN11", "MCF2", "MAPK12", "MAP2K5", "PPP1R15A", "SOX9", "HPGD", "SORT1", "COL3A1", "RAMP2", "RICTOR", "GAB1", "TRIM33", "ARHGEF12", "KIDINS220", "SOX6", "NRP1", "CEP57", "ARHGEF4", "CDKN2B", "B…
144	NEGATIVE REGULATION OF GENE EXPRESSION%GO%GO:0010629	7.03935e-09	1.4504e-07	0.761461	0.275169	2.23927	307	c("TNFRSF4", "SFRP1", "BMP4", "ESR1", "MDFIC", "TCEAL7", "RUNX2", "LEF1", "CRYM", "HDAC9", "FOXS1", "ARID5A", "PRMT2", "ZEB1", "PER2", "SOX15", "SOX8", "CAPN3", "FOXC2", "CBX7", "PRICKLE1", "WTIP", "NAB1", "MAP2K5", "NR2F1", "PIWIL4", "SOX9", "SOX7", "ZNF425", "ING4", "MAEL", "MDM4", "BTRC", "HMGB2", "CRY2", "TRIM33", "PLK3", "MPHOSPH8", "KLF12", "SMARCA2", "TPR", "SMO", "GATA6", "DDIT3", "DNMT3B…
145	MUSCLE CONTRACTION%GO%GO:0006936	7.73595e-09	1.58294e-07	0.74774	0.451676	2.8117	66	c("TNNT1", "HTR2B", "SULF1", "EDNRA", "TNNT3", "SCN2B", "MYL1", "KCNE1", "KCNMA1", "SNTB1", "MYH11", "SCN3B", "SCN4B", "MYL7", "TPM3", "SSPN", "SULF2", "SLMAP", "TNNI3", "EDN3", "CALD1", "LMOD1", "NEB", "GAMT", "CSRP3", "ACTN2", "ASPH", "SORBS1", "FXYD1", "SCN4A", "HCN2", "SGCA", "TNNI1", "TNNC2", "VCL", "MYL6B", "ROCK1", "SCN7A", "MYL9", "DMD", "GJA1")
146	CELL CYCLE PROCESS%GO%GO:0022402	9.23505e-09	1.87674e-07	0.74774	0.276994	2.24879	303	c("SOX4", "HSPA2", "CCND1", "CENPA", "NDC80", "CCNG2", "TGFB2", "WEE1", "TPD52L1", "BRSK1", "MYH10", "MAP4", "PLAGL1", "NES", "PKD2", "APBB2", "CKAP2", "REC8", "OSGIN2", "MCM2", "XPC", "MAPK12", "SPTBN1", "TP53INP1", "PLK2", "IRF6", "NUSAP1", "PPP1R15A", "CRADD", "ING4", "WNT9A", "INHBA", "BTRC", "PLK3", "CETN3", "NCAPD3", "GINS2", "CYP26B1", "TPR", "DYNLL1", "CEP57", "TCF7L2", "STMN1", "SPIRE1",…
147	MEMBRANE-BOUNDED VESICLE%GO%GO:0031988	9.36421e-09	1.87727e-07	0.74774	0.304817	2.37559	216	c("GRIA3", "SERPINE2", "SNCA", "MME", "PROS1", "SYTL2", "EDIL3", "DPYSL3", "SGIP1", "CPE", "CRHBP", "MYOC", "LEFTY2", "AMPH", "TGFB2", "SH3GL2", "TGFB3", "RASSF9", "DPP4", "RAB23", "BRSK1", "COL1A2", "APOA1", "PCSK5", "CA4", "COPZ2", "VEGFC", "TYRP1", "MYO5B", "SCG5", "SSPN", "CXCR4", "CAMK2B", "RAB26", "LAMA4", "VAMP1", "DLG4", "GSN", "VPS41", "SYTL1", "MYRIP", "GRIA1", "BAIAP2L2", "SORT1", "ANP…
148	NEGATIVE REGULATION OF NITROGEN COMPOUND METABOLIC PROCESS%GO%GO:0051172	9.36421e-09	1.87727e-07	0.74774	0.270831	2.21553	327	c("TNFRSF4", "SFRP1", "BMP4", "MDFIC", "TCEAL7", "RUNX2", "LEF1", "DRD4", "CRYM", "HDAC9", "APLP1", "FOXS1", "TGFB3", "ARID5A", "PRMT2", "ZEB1", "PER2", "SOX15", "SOX8", "CAPN3", "ANKRD1", "FOXC2", "CBX7", "PRICKLE1", "NAB1", "MAP2K5", "NR2F1", "SOX9", "SOX7", "ZNF425", "ING4", "MDM4", "BTRC", "HMGB2", "CRY2", "TRIM33", "PLK3", "MPHOSPH8", "KLF12", "SMARCA2", "TPR", "GATA6", "DDIT3", "DNMT3B", "T…
149	ANATOMICAL STRUCTURE FORMATION INVOLVED IN MORPHOGENESIS%GO%GO:0048646	9.92049e-09	1.97544e-07	0.74774	0.336912	2.49804	160	c("PROM1", "SOX4", "THY1", "BMP4", "CC2D2A", "MYOZ1", "LEF1", "TGFB2", "FOXS1", "MYH11", "SCG2", "ESM1", "TTC8", "PLXDC1", "SOX8", "MCAM", "CAPN3", "INTU", "ANKRD1", "FOXC2", "PRICKLE1", "SOX9", "SOX7", "GPR124", "FOXI2", "TNNI3", "ATPIF1", "JAM3", "APOD", "EPHB3", "RAMP2", "TTC26", "DZIP1", "BBS10", "SMO", "ROBO1", "BBS1", "LRRC6", "BBS4", "SPAG16", "TMEM107", "BMPR2", "CEP290", "STIL", "FZD6", …
150	MYOFIBRIL%GO%GO:0030016	1.11623e-08	2.2079e-07	0.74774	0.484173	2.8735	56	c("TNNT1", "TNNT3", "MYL1", "KCNE1", "PAK1", "SCN3B", "MYL7", "TPM3", "SORBS2", "CAPN3", "ANKRD1", "SVIL", "TNNI3", "NEXN", "NEB", "CSRP3", "SYNM", "ACTN2", "DST", "CAV3", "OBSCN", "MYOM1", "MYPN", "CACNA1D", "TNNI1", "SYNE2", "GCOM1", "KY", "TNNC2", "LDB3", "VCL", "DMD", "HABP4", "TWF2", "RYR2", "CTNNB1", "SRI", "OBSL1", "MYOZ2", "SLC8A1", "PGM5", "DNAJB6", "CASQ2", "NEBL", "PDE4DIP", "TNNC1", "…
151	ORGAN MORPHOGENESIS%GO%GO:0009887	1.2267e-08	2.40663e-07	0.74774	0.335585	2.48719	158	c("FRZB", "COMP", "HTR2B", "PROM1", "FREM1", "SOX4", "THY1", "COL9A1", "BMP4", "CPE", "ENAM", "EVC", "TGFB2", "APLP1", "FOXS1", "TGFB3", "LFNG", "COL13A1", "RAB23", "COL1A2", "CRIP1", "SOX8", "PKD2", "ANKRD1", "FOXC2", "EVL", "TMEM176B", "LRP5", "WNT2B", "SOX9", "SEMA6A", "WNT9A", "FOXI2", "TNNI3", "INHBA", "IRX5", "CYP26B1", "SMO", "GATA6", "TUFT1", "BBS4", "PKD1", "CEP290", "STIL", "FZD6", "PTP…
152	PROTEINACEOUS EXTRACELLULAR MATRIX%GO%GO:0005578	1.23292e-08	2.40663e-07	0.74774	0.425546	2.7671	78	c("THBS4", "POSTN", "SNCA", "COL14A1", "COL16A1", "ECM2", "MFAP4", "LUM", "SFRP1", "COL9A1", "AGRN", "ENAM", "MMP28", "APLP1", "COL9A2", "LTBP4", "COL13A1", "COL8A1", "COL1A2", "FLRT2", "MATN2", "LEPREL1", "LAMA2", "COL7A1", "COL8A2", "KAL1", "LAMA4", "LAMC3", "COL3A1", "ADAMTS13", "THBS3", "EFEMP2", "MMP23B")
153	STRUCTURAL MOLECULE ACTIVITY%GO%GO:0005198	1.26437e-08	2.43774e-07	0.74774	0.327989	2.4397	163	c("COMP", "COL14A1", "LUM", "COL9A1", "MYL1", "AGRN", "ENAM", "MYOC", "MAP1A", "BFSP1", "COL9A2", "MYH11", "COL13A1", "COL1A2", "SORBS2", "MAP4", "FBLN2", "RPS4Y1", "LAMA2", "CAPN3", "COL8A2", "KAL1", "LAMA4", "MAP2", "MYL5", "SPTBN1", "LAMC3", "SHANK1", "WNT9A", "BICD1", "COL3A1", "MYOM2", "ANK1", "SPTAN1", "TUFT1", "NEXN", "ADD3", "EFEMP2", "LLGL1", "NEB", "CSRP3", "COL19A1", "BAZ1B", "JAG1", "…
154	POSITIVE REGULATION OF PHOSPHATE METABOLIC PROCESS%GO%GO:0045937	1.27351e-08	2.43774e-07	0.74774	0.311016	2.40349	208	c("THBS4", "HTR2B", "FZD2", "PLCE1", "KIT", "SNCA", "CCND1", "EDNRA", "JAK2", "BMP4", "MDFIC", "APOE", "DRD4", "PAK1", "TGFB2", "CHRNA3", "NTRK2", "TGFB3", "CCND2", "TPD52L1", "PKD2", "KDELR3", "CXCR4", "CLIP3", "PELI2", "MAP2K5", "SOX9", "TNIK", "FGF13", "FZD7", "GFPT1", "INHBA", "GRB10", "IGF1", "RAMP2", "EDN3", "FAM129A", "BMP6", "KIDINS220", "PILRB", "PTHLH", "P2RY1", "DDIT3", "NRP1", "GHR", …
155	POSITIVE REGULATION OF PHOSPHORUS METABOLIC PROCESS%GO%GO:0010562	1.27351e-08	2.43774e-07	0.74774	0.311016	2.40349	208	c("THBS4", "HTR2B", "FZD2", "PLCE1", "KIT", "SNCA", "CCND1", "EDNRA", "JAK2", "BMP4", "MDFIC", "APOE", "DRD4", "PAK1", "TGFB2", "CHRNA3", "NTRK2", "TGFB3", "CCND2", "TPD52L1", "PKD2", "KDELR3", "CXCR4", "CLIP3", "PELI2", "MAP2K5", "SOX9", "TNIK", "FGF13", "FZD7", "GFPT1", "INHBA", "GRB10", "IGF1", "RAMP2", "EDN3", "FAM129A", "BMP6", "KIDINS220", "PILRB", "PTHLH", "P2RY1", "DDIT3", "NRP1", "GHR", …
156	NEGATIVE REGULATION OF RNA METABOLIC PROCESS%GO%GO:0051253	1.31098e-08	2.49339e-07	0.74774	0.274714	2.22427	296	c("TNFRSF4", "SFRP1", "BMP4", "MDFIC", "TCEAL7", "RUNX2", "LEF1", "CRYM", "HDAC9", "FOXS1", "ARID5A", "PRMT2", "ZEB1", "PER2", "SOX15", "SOX8", "CAPN3", "FOXC2", "CBX7", "PRICKLE1", "NAB1", "MAP2K5", "NR2F1", "SOX9", "SOX7", "ZNF425", "ING4", "MDM4", "BTRC", "HMGB2", "CRY2", "TRIM33", "PLK3", "MPHOSPH8", "KLF12", "SMARCA2", "TPR", "GATA6", "DDIT3", "DNMT3B", "TCF7L2", "ZNF254", "DACT1", "KANK2", …
157	CENTRAL NERVOUS SYSTEM DEVELOPMENT%GO%GO:0007417	1.32022e-08	2.49496e-07	0.74774	0.356059	2.56447	135	c("SFRP4", "FRZB", "FZD2", "SOX4", "MBP", "SFRP1", "BMP4", "SERPINI1", "LEF1", "CNTN4", "NTRK2", "SH3GL2", "ADAM22", "DIXDC1", "SOX8", "NES", "PKD2", "PTPN11", "WDR62", "FZD1", "RNF103", "HESX1", "MAP2", "ALDH5A1", "WNT2B", "FGF13", "FZD7", "GPR124", "APOD", "EPHB3", "PCDH18", "MDGA1", "SMO", "TCF7L2", "ROBO1", "ARNT2", "BBS4", "PKD1", "CEP290", "STIL", "FZD6", "PLCB1", "SFRP2", "SHROOM2", "ZNF28…
158	REGULATION OF NUCLEOSIDE METABOLIC PROCESS%GO%GO:0009118	1.39353e-08	2.61684e-07	0.74774	0.407963	2.70509	86	c("EPHA3", "THY1", "SFRP1", "TNNT3", "RGS4", "AGRN", "RGS11", "NTRK2", "RGS5", "RABGAP1L", "NET1", "SIPA1L1", "DOCK1", "ALDH1A1", "RGS17", "ALS2CR12", "TNNI3", "EPHB3", "RGS6", "RALBP1", "RABGAP1", "ALS2", "NTF3", "RAPGEF6", "LLGL1", "CHN2", "PLCB1", "FGD5", "TSC1", "RGN", "RASAL2", "TAX1BP3", "GABARAPL2", "PPARGC1A", "SYNGAP1", "ARHGEF6", "SNX13", "TBC1D15", "ELMOD2", "EPHA5", "RGS3", "PLXNB2", …
159	ION TRANSPORT%GO%GO:0006811	1.41482e-08	2.64011e-07	0.74774	0.28777	2.29542	255	c("CA3", "KCNA5", "HTR2B", "SNCA", "SLC26A4", "SCN2B", "SLC1A7", "KCNT2", "KCNMB1", "DRD4", "KCNE1", "CRYM", "KCNMA1", "ATP1B4", "CHRNA3", "SLC16A4", "SLC27A6", "GLRB", "GABRB1", "KCNS3", "ABCC8", "ACE", "SCN3B", "SCN4B", "ATP6V1G2", "CDH23", "KCNAB1", "ATP1B2", "FYN", "CA4", "KCNA4", "SLC40A1", "PKD2", "KCNC4", "SLC9A5", "UCP2", "KCNK6", "SLC30A1", "RYR3", "KCNMB4", "CACNA2D1", "SLC16A7", "SLC44…
160	PROTEIN LOCALIZATION%GO%GO:0008104	1.44078e-08	2.67175e-07	0.74774	0.279769	2.2595	281	c("CENPA", "JAK2", "BMP4", "NDC80", "CPE", "AGRN", "NRXN2", "TGFB2", "IFIT1", "RASSF9", "SCG2", "SCN3B", "ATP6V1G2", "PCSK5", "MAP4", "COPZ2", "PKD2", "KIF13A", "RPS4Y1", "SCG5", "PACS1", "CAPN3", "DDX42", "S100A13", "PRICKLE1", "PDIA2", "RAB26", "CLIP3", "PPP1R10", "SPTBN1", "DLG4", "NUSAP1", "SHANK1", "RTP4", "FGF13", "BTN3A1", "AMOT", "BICD1", "RAMP2", "ANK1", "COG7", "TPR", "SMO", "P2RY1", "L…
161	INTRACELLULAR SIGNAL TRANSDUCTION%GO%GO:0035556	1.51866e-08	2.79867e-07	0.733762	0.258453	2.13943	367	c("HTR2B", "PLCE1", "SOX4", "SOCS2", "JAK2", "NDC80", "MDFIC", "ARHGAP24", "APOE", "STK38L", "PAK1", "RHOBTB1", "CHN1", "ARHGAP28", "GADD45A", "DDAH1", "SCG2", "ICK", "COL1A2", "BCL2", "MLLT11", "FYN", "PKD2", "NET1", "APBB2", "PIK3R1", "APBB3", "TIAM2", "ARHGEF3", "CXCR4", "ARHGAP1", "ARHGAP19", "RGL1", "MCF2", "MAPK12", "PLK2", "GAB2", "SOX9", "CRADD", "TNIK", "FGF13", "ING4", "TP53I3", "RASGRP…
162	REGULATION OF CELL MOTILITY%GO%GO:2000145	1.57688e-08	2.88802e-07	0.733762	0.339668	2.49918	151	c("THBS4", "SERPINE2", "SULF1", "THY1", "ENPP2", "IGFBP5", "SFRP1", "BMP4", "DPYSL3", "PODN", "APOE", "IGFBP3", "LEF1", "TGFB2", "HDAC9", "HBEGF", "FGF1", "ACE", "VEGFC", "KANK1", "SCARB1", "FOXC2", "MAP2K5", "TP53INP1", "SOX9", "JAM3", "APOD", "AMOT", "IGF1", "EDN3", "NRP1", "RNF20", "THBS3", "NTF3", "NEXN", "BBS4", "BMPR2", "PTGER4", "VTN", "PTPRM", "PLCB1", "SFRP2", "CCL5", "PRKD1", "JAG1", "F…
163	BIOLOGICAL ADHESION%GO%GO:0022610	1.65176e-08	3.0066e-07	0.733762	0.311365	2.3839	190	c("THBS4", "POSTN", "KIT", "ANTXR1", "COL14A1", "COL16A1", "ECM2", "THY1", "MFAP4", "ISLR", "JAM2", "SGCE", "ACE2", "LEF1", "ITGBL1", "CDH17", "CNTN4", "TRO", "COL13A1", "CDH23", "DDR1", "ASTN1", "ITGA8", "BCAM", "FERMT1", "DCHS1", "SSPN", "SCARB1", "PTPRD", "PKD1L1", "COL8A2", "CDH6", "ITGA10", "PODXL2", "SOX9", "MPZL2", "TNIP1", "EPHB3", "COL3A1", "FEZ1", "ADAMTS13", "CERCAM", "SEMA5A", "VCAM1"…
164	RESPONSE TO ENDOGENOUS STIMULUS%GO%GO:0009719	1.85613e-08	3.35801e-07	0.733762	0.284627	2.2675	253	c("SFRP4", "FMOD", "SNCA", "SOCS2", "IGFBP5", "SFRP1", "JAK2", "BMP4", "PDE1A", "GDF10", "ESR1", "CRHBP", "RUNX2", "LEFTY2", "DRD4", "TGFB2", "GDF15", "GNB3", "HDAC9", "APLP1", "CHRNA3", "FOXS1", "TGFB3", "FGF1", "FGF18", "ATP6V1G2", "COL1A2", "BCL2", "PDE1C", "PKD2", "PIK3R1", "ANKRD1", "FOXC2", "USP9Y", "RYR3", "PKD1L1", "PTPN11", "GNG11", "PPP1R15A", "SOX9", "LMO2", "HPGD", "SORT1", "GRB10", "…
165	CHEMICAL HOMEOSTASIS%GO%GO:0048878	1.90996e-08	3.43445e-07	0.733762	0.303239	2.35244	213	c("SFRP4", "KCNA5", "HTR2B", "PLCE1", "SNCA", "SOX4", "SLC26A4", "MBP", "ABCG2", "EDNRA", "SCN2B", "APOE", "DRD4", "KCNE1", "HFE2", "HEPH", "KCNMA1", "IFIT1", "CHRNA3", "CYBRD1", "SCN3B", "SCN4B", "ATP6V1G2", "APOA1", "CYSLTR1", "CDH23", "BCL2", "SLC40A1", "PKD2", "SLC30A1", "SCARB1", "CXCR4", "KCNMB4", "PDE6A", "DLG4", "EPHX2", "LRP5", "APOM", "PDK3", "SHANK1", "KCNMB2", "TNNI3", "CACNA1B", "P2R…
166	REGULATION OF CELL DIFFERENTIATION%GO%GO:0045595	2.01189e-08	3.59595e-07	0.733762	0.278038	2.24551	281	c("SFRP4", "FRZB", "PROM1", "KIT", "SERPINE2", "EPHA3", "THY1", "SFRP1", "BMP4", "DPYSL3", "BOC", "APOE", "AGRN", "IGFBP3", "TCF4", "LEF1", "TGFB2", "CHN1", "CNTN4", "HDAC9", "CHRNA3", "NTRK2", "TGFB3", "LTBP4", "ZEB1", "DIXDC1", "SOX8", "KANK1", "SIPA1L1", "CXCR4", "CAMK2B", "PTPRD", "SERPINF1", "PRICKLE1", "MYOCD", "MAPK12", "LRP5", "LRRC4C", "SOX9", "TNIK", "FGF13", "FZD7", "WNT9A", "INHBA", "…
167	DNA BINDING%GO%GO:0003677	2.03785e-08	3.62053e-07	0.733762	0.262174	2.15683	346	c("SOX4", "ESR1", "MEOX2", "TCF4", "HMGN2", "LEF1", "HIST1H2AC", "MYCN", "FOXS1", "AFF3", "GLI1", "LHFP", "ZEB1", "DBP", "RAD51AP1", "BCL2", "CRIP1", "SOX15", "PLAGL1", "SOX8", "HLF", "GATA5", "ANKRD1", "FOXC2", "PIF1", "MCM2", "MYOCD", "XPC", "HESX1", "NR2F1", "IRF6", "HR", "SOX9", "SOX7", "LMO2", "DDX60", "SSBP2", "FOXD2", "RARB", "FOXI2", "ZDHHC1", "HMGB2", "HIST1H2BC", "NR2C1", "CRY2", "HIST1…
168	VESICLE-MEDIATED TRANSPORT%GO%GO:0016192	2.14169e-08	3.78237e-07	0.733762	0.296619	2.32025	222	c("HTR2B", "KIT", "SNCA", "PROS1", "SYTL2", "APOE", "AP3M2", "CRHBP", "LEFTY2", "AMPH", "TGFB2", "SH3GL2", "TGFB3", "COLEC12", "APOA1", "SCRN1", "VEGFC", "KIF13A", "MYO5B", "DOCK1", "SCARB1", "LRMP", "S100A13", "LRP3", "CADPS", "RAB26", "KIAA1244", "SPTBN1", "RAB11FIP3", "DOPEY1", "VPS41", "SYTL1", "PDLIM7", "SORT1", "IGF1", "RAMP2", "DENND2A", "ANK1", "COG7", "PSD3", "LMTK2", "FBXO8", "GHR", "PL…
169	RESPONSE TO WOUNDING%GO%GO:0009611	2.3234e-08	4.07901e-07	0.733762	0.28094	2.2431	259	c("PDE5A", "KIT", "PROS1", "F2RL2", "MDK", "JAK2", "DPYSL3", "JAM2", "PDE1A", "DGKI", "CRHBP", "KCNMB1", "CX3CR1", "LEFTY2", "PLAT", "NOX4", "PAK1", "TGFB2", "KCNMA1", "HDAC9", "TGFB3", "WEE1", "SCG2", "COL1A2", "APOA1", "DDR1", "ATP1B2", "FYN", "VEGFC", "CDO1", "MAFK", "PIK3R1", "GATA5", "MCAM", "DOCK1", "SCARB1", "CXCR4", "KCNMB4", "PTPN11", "PDE6A", "CD47", "EPHX2", "FZD7", "KCNMB2", "JAM3", "…
170	ACTIN CYTOSKELETON ORGANIZATION%GO%GO:0030036	2.48941e-08	4.34476e-07	0.733762	0.407681	2.67921	82	c("KIT", "ANTXR1", "JAK2", "DPYSL3", "MYOZ1", "PAK1", "FSCN1", "MYH11", "SIPA1L1", "CAPN3", "ANKRD1", "EVL", "LIMA1", "TNIK", "GSN", "ATXN3", "AMOT", "RICTOR", "FBXO8", "DYNLL1", "SPIRE1", "LLGL1", "RND3", "MRAS", "CSRP3", "FGD5", "SHROOM2", "SHROOM1", "OBSCN", "SORBS1", "CDC42BPB", "PACSIN1", "MYPN", "MON2", "ARHGEF2", "NPHP1", "COBL", "PROX1", "ATP2C1", "RAP2A", "NPHS2", "JMY", "MICAL2", "ARRB1…
171	CELLULAR COMPONENT ASSEMBLY INVOLVED IN MORPHOGENESIS%GO%GO:0010927	2.54514e-08	4.41604e-07	0.733762	0.524525	2.86614	41	c("CC2D2A", "MYOZ1", "MYH11", "TTC8", "CAPN3", "INTU", "ANKRD1", "TTC26", "DZIP1", "BBS10", "BBS1", "LRRC6", "BBS4", "SPAG16", "TMEM107", "CEP290", "CSRP3", "OBSCN", "TTLL3", "GPC1", "MYPN", "TMEM67", "STK36", "MKS1", "PROX1", "BBS2", "CD9", "IFT172", "WDR35", "NEK1", "MEF2A")
172	NEGATIVE REGULATION OF TRANSCRIPTION, DNA-DEPENDENT%GO%GO:0045892	2.73927e-08	4.72523e-07	0.733762	0.275315	2.22593	289	c("TNFRSF4", "SFRP1", "BMP4", "MDFIC", "TCEAL7", "RUNX2", "LEF1", "CRYM", "HDAC9", "FOXS1", "ARID5A", "PRMT2", "ZEB1", "PER2", "SOX15", "SOX8", "CAPN3", "FOXC2", "CBX7", "PRICKLE1", "NAB1", "MAP2K5", "NR2F1", "SOX9", "SOX7", "ZNF425", "ING4", "MDM4", "BTRC", "HMGB2", "CRY2", "TRIM33", "PLK3", "MPHOSPH8", "KLF12", "SMARCA2", "TPR", "GATA6", "DDIT3", "DNMT3B", "TCF7L2", "ZNF254", "DACT1", "KANK2", …
173	REGULATION OF MUSCLE ORGAN DEVELOPMENT%GO%GO:0048634	2.812e-08	4.76468e-07	0.733762	0.573966	2.92465	32	c("BMP4", "BOC", "AGRN", "IGFBP3", "LEF1", "HDAC9", "SOX15", "SOX8", "MYOCD", "SOX9", "MKL2", "PLCB1", "EFNB2", "FGF2", "HDAC5", "HDAC4", "FGFR2", "TBX3", "MEF2C", "DDX17", "GPC1")
174	REGULATION OF MUSCLE TISSUE DEVELOPMENT%GO%GO:1901861	2.812e-08	4.76468e-07	0.733762	0.573966	2.92465	32	c("BMP4", "BOC", "AGRN", "IGFBP3", "LEF1", "HDAC9", "SOX15", "SOX8", "MYOCD", "SOX9", "MKL2", "PLCB1", "EFNB2", "FGF2", "HDAC5", "HDAC4", "FGFR2", "TBX3", "MEF2C", "DDX17", "GPC1")
175	REGULATION OF STRIATED MUSCLE TISSUE DEVELOPMENT%GO%GO:0016202	2.812e-08	4.76468e-07	0.733762	0.573966	2.92465	32	c("BMP4", "BOC", "AGRN", "IGFBP3", "LEF1", "HDAC9", "SOX15", "SOX8", "MYOCD", "SOX9", "MKL2", "PLCB1", "EFNB2", "FGF2", "HDAC5", "HDAC4", "FGFR2", "TBX3", "MEF2C", "DDX17", "GPC1")
176	DEVELOPMENT OF PRIMARY SEXUAL CHARACTERISTICS%GO%GO:0045137	2.82637e-08	4.76468e-07	0.733762	0.519928	2.85129	42	c("SFRP4", "FRZB", "FZD2", "KIT", "SFRP1", "SOX15", "SOX8", "FZD1", "WNT2B", "SOX9", "FZD7", "INHBA", "IRX5", "SMO", "MAMLD1", "GATA6", "LRRC6", "MSH2", "FZD6", "SFRP2", "LHCGR", "CBX2", "TBX3", "FZD3", "FGF9")
177	STRUCTURAL CONSTITUENT OF MUSCLE%GO%GO:0008307	3.04122e-08	5.09792e-07	0.719513	0.697452	2.87996	18	c("MYL1", "MYH11", "SORBS2", "CAPN3", "MYL5", "MYOM2", "NEXN", "NEB", "CSRP3", "SYNM", "ACTN2", "ASPH", "OBSCN", "MYOM1", "MYL6B", "MYL9", "DMD")
178	TRANSMEMBRANE RECEPTOR PROTEIN TYROSINE KINASE SIGNALING PATHWAY%GO%GO:0007169	3.15667e-08	5.2617e-07	0.719513	0.294425	2.30309	222	c("PLCE1", "KIT", "SULF1", "EPHA3", "SOCS2", "JAK2", "PDE1A", "CHN1", "HBEGF", "CHRNA3", "NTRK2", "SH3GL2", "FOXS1", "FGF1", "FGF18", "ATP6V1G2", "CRIM1", "DDR1", "PCSK5", "PDE1C", "VEGFC", "NET1", "PIK3R1", "TIAM2", "SIPA1L1", "FOXC2", "ARHGEF3", "SULF2", "PTPN11", "MCF2", "MAPK12", "MAP2K5", "GAB2", "SOX9", "SORT1", "EPHB3", "GRB10", "RICTOR", "GAB1", "PDE3B", "ARHGEF12", "KIDINS220", "PILRB", …
179	HOMEOSTATIC PROCESS%GO%GO:0042592	3.20884e-08	5.31879e-07	0.719513	0.277395	2.24157	283	c("SFRP4", "KCNA5", "HTR2B", "PLCE1", "KIT", "SNCA", "SOX4", "SLC26A4", "MBP", "ABCG2", "EDNRA", "SCN2B", "JAK2", "APOE", "DRD4", "KCNE1", "HFE2", "HEPH", "KCNMA1", "IFIT1", "CHRNA3", "ACADL", "CYBRD1", "SCN3B", "SCN4B", "ATP6V1G2", "APOA1", "CYSLTR1", "CDH23", "BCL2", "SLC40A1", "PKD2", "ZSCAN4", "CAPN3", "SLC30A1", "SCARB1", "CXCR4", "KCNMB4", "PDE6A", "DLG4", "EPHX2", "LRP5", "APOM", "SOX9", "…
180	EXTRACELLULAR MATRIX ORGANIZATION%REACTOME%REACT_118779.4	3.63445e-08	5.99078e-07	0.719513	0.418978	2.71303	76	c("TLL2", "COL14A1", "CTSK", "COL16A1", "COL10A1", "MFAP4", "COL9A1", "TIMP2", "BMP4", "LTBP3", "COL21A1", "TGFB2", "COL9A2", "TGFB3", "LTBP4", "COL13A1", "COL8A1", "COL24A1", "COL1A2", "FBLN2", "LEPREL1", "ITGA8", "PCOLCE2", "COL7A1", "COL8A2", "LEPREL2", "COL3A1", "COL22A1", "COL4A5", "EFEMP2", "VTN", "COL19A1", "MMP15")
181	CATION BINDING%GO%GO:0043169	3.9393e-08	6.4574e-07	0.719513	0.277933	2.22527	265	c("THBS4", "COMP", "HTR2B", "QPCT", "PDE5A", "SNCA", "MME", "ENPP2", "APOE", "STK38L", "AGRN", "ACE2", "IGFBP3", "DRD4", "CHRNA3", "GLRB", "LTBP4", "ACE", "ICK", "BRSK1", "SOD3", "S100A6", "MYL7", "MASP1", "APOBEC3G", "CRIP1", "PKD2", "DNASE1L3", "SNRK", "ZFP37", "CAPN3", "PIF1", "S100A13", "APOBEC3F", "HKR1", "ANXA4", "ZNF91", "MAPK12", "EPHX2", "MSRB3", "TSSK6", "GSN", "MYRIP", "MDM4", "PRTFDC1…
182	REGULATION OF PROTEIN MODIFICATION PROCESS%GO%GO:0031399	4.20017e-08	6.8472e-07	0.719513	0.264265	2.16181	327	c("THBS4", "HTR2B", "PLCE1", "KIT", "SNCA", "SOX4", "THY1", "CCND1", "SFRP1", "JAK2", "BMP4", "UCHL1", "MDFIC", "RGS4", "APOE", "STK38L", "IGFBP3", "DRD4", "PAK1", "TGFB2", "HERC5", "CHRNA3", "TGFB3", "GADD45A", "CCND2", "TPD52L1", "PKD2", "KDELR3", "CAPN3", "CXCR4", "PRICKLE1", "CLIP3", "MYOCD", "PELI2", "MAP2K5", "LRP5", "SOX9", "TNIK", "CNKSR3", "FGF13", "GFPT1", "INHBA", "BTRC", "IGF1", "EDN3…
183	EPITHELIUM DEVELOPMENT%GO%GO:0060429	4.39676e-08	7.12852e-07	0.719513	0.383454	2.60921	98	c("SFRP4", "FRZB", "FZD2", "PROM1", "SOX4", "JAK2", "BMP4", "LEF1", "PAK1", "FOXS1", "FGF1", "DDR1", "SOX8", "PKD2", "GATA5", "FOXC2", "PRICKLE1", "FZD1", "DACT2", "LRP5", "IRF6", "SOX9", "FZD7", "FOXD2", "SMO", "GATA6", "BBS4", "PKD1", "BMPR2", "STIL", "FZD6", "SFRP2", "JAG1", "FGF2", "NPHP3", "ID2", "FGFR2", "FZD3", "DVL2", "MEF2C", "DVL3", "COBL", "MESP1", "PROX1", "TXNIP", "NFIB", "NPHS2", "V…
184	REGULATION OF NUCLEOTIDE CATABOLIC PROCESS%GO%GO:0030811	4.61465e-08	7.44112e-07	0.719513	0.398062	2.63943	86	c("EPHA3", "THY1", "SFRP1", "TNNT3", "RGS4", "AGRN", "RGS11", "NTRK2", "RGS5", "RABGAP1L", "NET1", "SIPA1L1", "DOCK1", "ALDH1A1", "RGS17", "ALS2CR12", "TNNI3", "EPHB3", "RGS6", "RALBP1", "RABGAP1", "ALS2", "NTF3", "RAPGEF6", "LLGL1", "CHN2", "PLCB1", "FGD5", "TSC1", "RGN", "RASAL2", "TAX1BP3", "GABARAPL2", "SYNGAP1", "ARHGEF6", "SNX13", "TBC1D15", "ELMOD2", "EPHA5", "RGS3", "PLXNB2", "ARRB1", "US…
185	ENZYME REGULATOR ACTIVITY%GO%GO:0030234	4.72193e-08	7.57295e-07	0.719513	0.283786	2.24259	243	c("HTR2B", "PLCE1", "SERPINE2", "SNCA", "PROS1", "THY1", "PTN", "FARP1", "ESR1", "RGS4", "APOE", "SERPINI1", "IGFBP3", "LEF1", "RGS11", "GUCA1C", "AZIN1", "RGS5", "TPD52L1", "APOA1", "IQGAP2", "RABGAP1L", "RECK", "NET1", "PIK3R1", "SCG5", "TIAM2", "CAPN3", "RENBP", "DOCK1", "ALDH1A1", "PCOLCE2", "ARHGAP1", "SERPINF1", "ANXA4", "KIAA1244", "RGL1", "RGS17", "FGF13", "ATPIF1", "ANP32E", "RASGRP1", "…
186	POSITIVE REGULATION OF CELLULAR COMPONENT ORGANIZATION%GO%GO:0051130	4.79807e-08	7.65369e-07	0.719513	0.318704	2.39461	174	c("SFRP4", "SNCA", "EPHA3", "SFRP1", "DPYSL3", "SGIP1", "HRK", "AGRN", "BDNF", "LEF1", "PAK1", "TGFB2", "NTRK2", "TGFB3", "TNFSF10", "DIXDC1", "MLLT11", "NES", "PIK3R1", "HAS3", "CAMK2B", "PTPRD", "CLIP3", "LRP5", "NUSAP1", "FRMPD4", "EPHB3", "BAMBI", "AMOT", "IGF1", "BICD1", "EDN3", "TPR", "DNMT3B", "TCF7L2", "ROBO1", "NTF3", "BBS4", "BCL2L11", "VTN", "PRKD1", "TSC1", "KIF5B", "ISLR2", "AR", "CA…
187	POSITIVE REGULATION OF PROTEIN METABOLIC PROCESS%GO%GO:0051247	4.93063e-08	7.82309e-07	0.719513	0.272428	2.20258	289	c("THBS4", "HTR2B", "PLCE1", "KIT", "SNCA", "SOX4", "CCND1", "JAK2", "BMP4", "MDFIC", "APOE", "DRD4", "PAK1", "TGFB2", "CHRNA3", "TGFB3", "CCND2", "TPD52L1", "PKD2", "KDELR3", "ASB9", "CAPN3", "CXCR4", "PRICKLE1", "CLIP3", "PELI2", "MAP2K5", "PERP", "SOX9", "SAMD4A", "TNIK", "FGF13", "GFPT1", "INHBA", "BTRC", "OSBPL7", "IGF1", "EDN3", "PLK3", "FAM129A", "BMP6", "KIDINS220", "PILRB", "P2RY1", "DDI…
188	CELL CYCLE ARREST%GO%GO:0007050	5.0589e-08	7.98391e-07	0.719513	0.51342	2.8156	42	c("TGFB2", "PLAGL1", "PKD2", "APBB2", "MAPK12", "TP53INP1", "IRF6", "PPP1R15A", "ING4", "INHBA", "TCF7L2", "CDKN2B", "PKD1", "KIF20B", "MFN2", "ATM", "PRKAA2", "TSC1", "PPP2R3B", "HBP1", "CDKN1B", "PRKAB2", "APC", "CDKN2C", "JMY", "GAS6", "NBN", "MAGI2", "KHDRBS1", "STK11")
189	AXON GUIDANCE%GO%GO:0007411	5.12298e-08	8.04226e-07	0.719513	0.349384	2.50477	130	c("ST8SIA2", "COL9A1", "DPYSL3", "AGRN", "ENAH", "PAK1", "HFE2", "CHN1", "CNTN4", "COL9A2", "SH3GL2", "MYH11", "SCN3B", "COL1A2", "ST8SIA4", "MYH10", "FYN", "UNC5B", "DOCK1", "PTPN11", "EVL", "KAL1", "SPTBN1", "MYO10", "DLG4", "LGI1", "SEMA6A", "FOXD2", "EPHB3", "COL3A1", "ARHGEF12", "ANK1", "FEZ1", "SMO", "SEMA5A", "SPTAN1", "NRP1", "SIAH2", "NTN4", "ROBO1", "COL4A5", "SEMA6D", "DPYSL4", "PTPRM"…
190	NEURON PROJECTION%GO%GO:0043005	5.25981e-08	8.21362e-07	0.719513	0.36906	2.58143	112	c("SFRP4", "FRZB", "FZD2", "SNCA", "MME", "THY1", "DPYSL3", "FARP1", "APOE", "CRHBP", "PAK1", "TGFB2", "CNTN4", "CHRNA3", "DIXDC1", "APBB2", "SIPA1L1", "FZD1", "SPTBN1", "DLG4", "PLK2", "SHANK1", "FRMPD4", "FGF13", "FZD7", "SEMA6A", "GRIA1", "APOD", "NCDN", "P2RY1", "SARM1", "ALS2", "LLGL1", "FZD6", "ADCY2", "ACTN2", "DST", "NLGN4X", "FZD3", "CDK5", "BSN", "SLC38A7", "PACSIN1", "LDLRAP1", "MAPT",…
191	GENE EXPRESSION%GO%GO:0010467	5.50559e-08	8.5524e-07	0.719513	0.23402	1.99223	490	c("DIO2", "ESR1", "POLR1E", "RUNX2", "TCF4", "LEF1", "NPPA", "PLAT", "IVNS1ABP", "CREB5", "PCSK5", "PLAGL1", "RPS4Y1", "HLF", "SCG5", "TCEA2", "RORA", "NR2F1", "ZNF444", "LMO2", "RBMS2", "RARB", "TNIP1", "SYF2", "BICD1", "NR2C1", "TRIM33", "TRIM29", "ADAMTS13", "PSIP1", "GATA6", "KLF5", "PPIL3", "DDIT3", "NR3C1", "POLR3B", "ANP32A", "GABPA", "ZSCAN1", "CDKN2B", "MED30", "PPIG", "TCFL5", "ZSCAN18"…
192	REGULATION OF RESPONSE TO STRESS%GO%GO:0080134	5.61045e-08	8.6699e-07	0.719513	0.295114	2.29996	216	c("SFRP4", "SERPINE2", "PROS1", "CFH", "JAK2", "MDFIC", "IER3", "APOE", "ACE2", "PLAT", "PAK1", "TGFB2", "HERC5", "IFIT1", "HBEGF", "TPD52L1", "COLEC12", "APOA1", "MASP1", "APOBEC3G", "DIXDC1", "FYN", "SOX15", "KANK1", "MID1", "PACS1", "CAPN3", "ANKRD1", "FOXC2", "APOBEC3F", "IL33", "PTPN11", "EDA2R", "PELI2", "TNIK", "DDX60", "EYA1", "FZD7", "TNIP1", "APOD", "HLA-DRB1", "CD247", "ULK1", "MAP4K4"…
193	REGULATION OF CELL DEATH%GO%GO:0010941	5.71532e-08	8.78619e-07	0.719513	0.253199	2.09052	361	c("SFRP4", "FRZB", "COMP", "HTR2B", "SNCA", "SOX4", "SOCS2", "SFRP1", "JAK2", "BMP4", "HRK", "APOE", "IGFBP3", "LEF1", "TGFB2", "KCNMA1", "IFIT2", "NTRK2", "TGFB3", "PRMT2", "SCG2", "TPD52L1", "BEX2", "BCL2", "TNFSF10", "MLLT11", "PLAGL1", "SOX8", "UNC5B", "NES", "NET1", "CAPN3", "ANKRD1", "ANXA4", "CLIP3", "NUPR1", "MAP2K5", "PLK2", "SOX9", "CRADD", "SOX7", "ING4", "KIAA0141", "GZMA", "CXCR7", "…
194	GLYCOSAMINOGLYCAN BINDING%GO%GO:0005539	5.82544e-08	8.90932e-07	0.719513	0.543288	2.86361	36	c("THBS4", "COMP", "POSTN", "SERPINE2", "CFH", "MDK", "SFRP1", "DPYSL3", "APOE", "AGRN", "HBEGF", "FGF1", "LTBP4", "COL13A1", "CHODL", "PCOLCE2", "PODXL2")
195	SARCOMERE%GO%GO:0030017	5.89422e-08	8.96828e-07	0.719513	0.481268	2.76274	49	c("TNNT1", "TNNT3", "MYL1", "KCNE1", "PAK1", "SCN3B", "MYL7", "TPM3", "SORBS2", "CAPN3", "ANKRD1", "TNNI3", "NEXN", "NEB", "CSRP3", "ACTN2", "DST", "CAV3", "OBSCN", "MYOM1", "MYPN", "CACNA1D", "TNNI1", "SYNE2", "GCOM1", "KY", "TNNC2", "LDB3", "HABP4", "RYR2", "CTNNB1", "SRI", "OBSL1", "MYOZ2", "SLC8A1", "PGM5", "DNAJB6", "CASQ2", "NEBL", "TNNC1", "TRIM32")
196	CELLULAR NITROGEN COMPOUND BIOSYNTHETIC PROCESS%GO%GO:0044271	6.13478e-08	9.24789e-07	0.704976	0.251388	2.08139	366	c("HTR2B", "ESR1", "POLR1E", "RUNX2", "TCF4", "LEF1", "NPPA", "IVNS1ABP", "CREB5", "NMNAT2", "PCSK5", "PLAGL1", "RPS4Y1", "HLF", "TCEA2", "NPPB", "LTC4S", "RORA", "NR2F1", "ZNF444", "LMO2", "RARB", "AK5", "ATPIF1", "GFPT1", "RAMP2", "PRTFDC1", "NR2C1", "TRIM33", "TRIM29", "ODC1", "GATA6", "KLF5", "DDIT3", "NR3C1", "POLR3B", "GABPA", "DCK", "ZSCAN1", "CDKN2B", "TK2", "MED30", "BDH2", "TCFL5", "ZSC…
197	SYNAPTIC TRANSMISSION%GO%GO:0007268	6.14091e-08	9.24789e-07	0.704976	0.306149	2.33507	187	c("KCNA5", "GRIA3", "SNCA", "MBP", "SCN2B", "KCNN3", "SLC6A1", "APOE", "AGRN", "AP3M2", "CRHBP", "GRM1", "BDNF", "KCNMB1", "DRD4", "AMPH", "KCNMA1", "GNB3", "CHRNA3", "GLRB", "GABRB1", "KCNS3", "ABCC8", "BRSK1", "KCNAB1", "RAPSN", "KCNA4", "KCNC4", "KCNK6", "CAMK2B", "KCNMB4", "SLC5A7", "KCNIP1", "VAMP1", "DLG4", "ALDH5A1", "SHANK1", "FRMPD4", "KCNMB2", "GRIA1", "CACNA1B", "EPHB3", "ATXN3", "SLC6…
198	GONAD DEVELOPMENT%GO%GO:0008406	6.1715e-08	9.24789e-07	0.704976	0.519685	2.77929	39	c("SFRP4", "FRZB", "FZD2", "KIT", "SFRP1", "SOX15", "SOX8", "FZD1", "WNT2B", "SOX9", "FZD7", "INHBA", "IRX5", "SMO", "MAMLD1", "GATA6", "LRRC6", "MSH2", "FZD6", "SFRP2", "LHCGR", "FZD3", "FGF9")
199	REGULATION OF CELLULAR COMPONENT MOVEMENT%GO%GO:0051270	6.27097e-08	9.34973e-07	0.704976	0.313525	2.34403	170	c("THBS4", "KCNA5", "SERPINE2", "SULF1", "THY1", "ENPP2", "IGFBP5", "SFRP1", "SCN2B", "BMP4", "DPYSL3", "PODN", "APOE", "IGFBP3", "LEF1", "TGFB2", "HDAC9", "HBEGF", "FGF1", "ACE", "SCN3B", "SCN4B", "VEGFC", "KANK1", "SCARB1", "FOXC2", "MAP2K5", "TP53INP1", "SOX9", "JAM3", "APOD", "AMOT", "IGF1", "EDN3", "NRP1", "RNF20", "THBS3", "NTF3", "NEXN", "BBS4", "BMPR2", "PTGER4", "VTN", "PTPRM", "PLCB1", …
200	REGULATION OF SECRETION%GO%GO:0051046	6.64721e-08	9.86113e-07	0.704976	0.362381	2.52809	110	c("KCNA5", "HTR2B", "SNCA", "SOX4", "TNFRSF4", "SFRP1", "SNCAIP", "CRHBP", "DRD4", "TGFB2", "CHRNA3", "TGFB3", "CACNA2D2", "KCNS3", "ABCC8", "APOA1", "RSAD2", "SCG5", "SLC30A1", "ANKRD1", "KCNMB4", "IL33", "NPPB", "RAB26", "LRP5", "GAB2", "MARCKS", "SCAMP5", "MYRIP", "INHBA", "HLA-DRB1", "EDN3", "BMP6", "TCF7L2", "PLA2R1", "CADM1", "PTGER4", "PLCB1", "NLRP1", "GDF9", "ITPR1", "SIRT4", "GCK", "CAC…
201	REGULATION OF ESTABLISHMENT OF PROTEIN LOCALIZATION%GO%GO:0070201	6.85297e-08	1.01158e-06	0.704976	0.370677	2.57215	107	c("HTR2B", "TMEM30B", "SOX4", "TNFRSF4", "BMP4", "MDFIC", "DRD4", "TGFB2", "XPO4", "TGFB3", "RAB23", "APOA1", "RSAD2", "KANK1", "PKD2", "DACT3", "PIK3R1", "ANKRD1", "IL33", "CLIP3", "FZD7", "SCAMP5", "APOD", "BAMBI", "IGF1", "HLA-DRB1", "BMP6", "PTPN14", "TPR", "TCF7L2", "CADM1", "DACT1", "DYRK2", "PKD1", "PTGER4", "NLRP1", "WWP2", "KIF5B", "MYO1C", "AR", "ASPH", "SORBS1", "RBPMS", "SIRT1", "LDLR…
202	REGULATION OF GTPASE ACTIVITY%GO%GO:0043087	6.97295e-08	1.0242e-06	0.704976	0.420098	2.71305	75	c("EPHA3", "THY1", "SFRP1", "RGS4", "AGRN", "RGS11", "NTRK2", "RGS5", "RABGAP1L", "NET1", "SIPA1L1", "DOCK1", "ALDH1A1", "RGS17", "ALS2CR12", "EPHB3", "RGS6", "RALBP1", "RABGAP1", "ALS2", "NTF3", "RAPGEF6", "LLGL1", "CHN2", "PLCB1", "FGD5", "TSC1", "RASAL2", "TAX1BP3", "SYNGAP1", "ARHGEF6", "SNX13", "TBC1D15", "ELMOD2", "EPHA5", "RGS3", "PLXNB2", "ARRB1", "USP6NL", "FGD6", "LRRK2", "RASGRP3", "RA…
203	CELL ADHESION%GO%GO:0007155	7.09274e-08	1.03666e-06	0.704976	0.305187	2.32819	188	c("THBS4", "POSTN", "KIT", "ANTXR1", "COL14A1", "COL16A1", "ECM2", "THY1", "MFAP4", "ISLR", "JAM2", "SGCE", "LEF1", "ITGBL1", "CDH17", "CNTN4", "TRO", "COL13A1", "CDH23", "DDR1", "ASTN1", "ITGA8", "BCAM", "FERMT1", "DCHS1", "SSPN", "PTPRD", "PKD1L1", "COL8A2", "CDH6", "ITGA10", "PODXL2", "SOX9", "MPZL2", "TNIP1", "EPHB3", "COL3A1", "FEZ1", "ADAMTS13", "CERCAM", "SEMA5A", "VCAM1", "AMIGO2", "THBS3…
204	REGULATION OF PURINE NUCLEOTIDE CATABOLIC PROCESS%GO%GO:0033121	7.34486e-08	1.06825e-06	0.704976	0.40427	2.67584	85	c("EPHA3", "THY1", "SFRP1", "TNNT3", "RGS4", "AGRN", "RGS11", "NTRK2", "RGS5", "RABGAP1L", "NET1", "SIPA1L1", "DOCK1", "ALDH1A1", "RGS17", "ALS2CR12", "TNNI3", "EPHB3", "RGS6", "RALBP1", "RABGAP1", "ALS2", "NTF3", "RAPGEF6", "LLGL1", "CHN2", "PLCB1", "FGD5", "TSC1", "RGN", "RASAL2", "TAX1BP3", "GABARAPL2", "SYNGAP1", "ARHGEF6", "SNX13", "TBC1D15", "ELMOD2", "EPHA5", "RGS3", "PLXNB2", "ARRB1", "US…
205	PHOSPHOLIPID BINDING%GO%GO:0005543	7.41301e-08	1.0729e-06	0.704976	0.412525	2.68243	78	c("THY1", "SYTL2", "PLEKHA4", "SGIP1", "APOE", "APOA1", "PAFAH2", "PIK3R1", "SCARB1", "ANXA4", "MYO10", "GAB2", "APOM", "FRMPD4", "SDPR", "BAIAP2L2", "COL4A3BP", "PLA2G4C", "FCHO2", "SH3YL1", "PLCB1", "SNX16", "SNX1", "PIGK", "F10", "MPPE1", "PLA2G15", "WIPI1", "PACSIN1", "LDLRAP1", "ITPR1", "SNX13", "TRIM72", "APOC1", "PLEKHA5", "OSBPL1A", "GAS6", "EEA1", "MARK1", "SESTD1", "TWF2", "ZFYVE1", "AK…
206	REGULATION OF GTP CATABOLIC PROCESS%GO%GO:0033124	7.52123e-08	1.08328e-06	0.704976	0.412248	2.66945	76	c("EPHA3", "THY1", "SFRP1", "RGS4", "AGRN", "RGS11", "NTRK2", "RGS5", "RABGAP1L", "NET1", "SIPA1L1", "DOCK1", "ALDH1A1", "RGS17", "ALS2CR12", "EPHB3", "RGS6", "RALBP1", "RABGAP1", "ALS2", "NTF3", "RAPGEF6", "LLGL1", "CHN2", "PLCB1", "FGD5", "TSC1", "RASAL2", "TAX1BP3", "SYNGAP1", "ARHGEF6", "SNX13", "TBC1D15", "ELMOD2", "EPHA5", "RGS3", "PLXNB2", "ARRB1", "USP6NL", "FGD6", "LRRK2", "RASGRP3", "RA…
207	MUSCLE SYSTEM PROCESS%GO%GO:0003012	7.72969e-08	1.10792e-06	0.704976	0.418629	2.70357	75	c("TNNT1", "HTR2B", "SULF1", "EDNRA", "TNNT3", "SCN2B", "MYL1", "KCNE1", "KCNMA1", "SNTB1", "MYH11", "SCN3B", "SCN4B", "MYL7", "TPM3", "SSPN", "SULF2", "SLMAP", "TNNI3", "IGF1", "EDN3", "CALD1", "LMOD1", "NEB", "GAMT", "CSRP3", "HDAC4", "ACTN2", "ASPH", "SORBS1", "FXYD1", "SCN4A", "HCN2", "TRIM72", "SGCA", "TNNI1", "TNNC2", "VCL", "MYL6B", "ROCK1", "SCN7A", "MYL9", "DMD", "GJA1")
208	SEQUENCE-SPECIFIC DNA BINDING TRANSCRIPTION FACTOR ACTIVITY%GO%GO:0003700	8.75642e-08	1.24905e-06	0.704976	0.286451	2.24585	227	c("AEBP1", "SOX4", "ESR1", "TCF4", "LEF1", "FOXS1", "CREB5", "DBP", "SOX15", "PLAGL1", "GATA5", "ZFP37", "FOXC2", "ZNF135", "MYOCD", "ZNF91", "RORA", "NR2F1", "ZNF444", "IRF6", "ZNF83", "ZNF277", "HR", "SOX9", "SOX7", "LMO2", "FOXD2", "FOXI2", "HMGB2", "TRIM29", "SOX6", "KLF12", "RFX5", "GATA6", "GABPA", "TCF7L2", "ARNT2", "ZSCAN1", "PURA", "TCFL5", "ZNF175", "MSRB2", "ZSCAN18", "THRA", "PRDM1", …
209	POSITIVE REGULATION OF DEVELOPMENTAL PROCESS%GO%GO:0051094	8.88793e-08	1.26079e-06	0.704976	0.312235	2.35926	180	c("SFRP4", "FRZB", "PROM1", "SERPINE2", "SFRP1", "BMP4", "BOC", "AGRN", "BDNF", "IGFBP3", "TCF4", "LEF1", "TGFB2", "HDAC9", "NTRK2", "TGFB3", "FGF1", "ZEB1", "DIXDC1", "SOX15", "SOX8", "CAPN3", "FOXC2", "CXCR4", "CAMK2B", "PTPRD", "SERPINF1", "MYOCD", "MAPK12", "LRP5", "WNT2B", "SOX9", "FOXD2", "INHBA", "EPHB3", "BAMBI", "HMGB2", "IGF1", "MKL2", "RAMP2", "BMP6", "SOX6", "SMO", "GATA6", "VWC2", "T…
210	PROTEIN DOMAIN SPECIFIC BINDING%GO%GO:0019904	8.94168e-08	1.26079e-06	0.704976	0.349349	2.47972	121	c("SFRP4", "FRZB", "FZD2", "SFRP1", "JAK2", "DPYSL3", "SGIP1", "LEF1", "DRD4", "ENAH", "BCL2", "PKD2", "WBP1", "EVL", "MYOCD", "FZD1", "SHANK1", "CXXC4", "CRADD", "FZD7", "TNNI3", "GRIA1", "SDC2", "SMO", "ARHGEF4", "TCF7L2", "ROBO1", "CADM1", "CNTROB", "PKD1", "KIF20B", "THRA", "FZD6", "SFRP2", "NLRP1", "LIN7B", "ACTN2", "ZNF521", "NR0B2", "DAPK3", "FZD3", "ERC1", "SIRT1", "ZXDA", "MAPT", "MYPN",…
211	NEGATIVE REGULATION OF MOLECULAR FUNCTION%GO%GO:0044092	8.96616e-08	1.26079e-06	0.704976	0.288748	2.27771	237	c("SFRP4", "SERPINE2", "SNCA", "PROS1", "THY1", "SYTL2", "TNFRSF4", "SFRP1", "PIK3IP1", "JAK2", "BMP4", "UCHL1", "FARP1", "ESR1", "RGS4", "APOE", "SERPINI1", "STK38L", "MYO1D", "TCEAL7", "CRHBP", "LEF1", "DRD4", "TGFB2", "IFIT2", "IFIT1", "FOXS1", "AZIN1", "PRMT2", "RECK", "NES", "PKD2", "PIF1", "SERPINF1", "MYOCD", "KIAA1244", "MAP2K5", "LRP5", "GZMA", "TNNI3", "ATPIF1", "SORT1", "BTRC", "BICD1"…
212	REGULATION OF MAPK CASCADE%GO%GO:0043408	9.25914e-08	1.29584e-06	0.704976	0.334918	2.4219	140	c("SFRP4", "HTR2B", "PLCE1", "KIT", "BMP4", "UCHL1", "MDFIC", "RGS4", "APOE", "STK38L", "DRD4", "PAK1", "TGFB2", "NTRK2", "TPD52L1", "DIXDC1", "MID1", "CXCR4", "EDA2R", "PELI2", "MAP2K5", "TNIK", "CNKSR3", "FZD7", "TNIP1", "IGF1", "EDN3", "KIDINS220", "P2RY1", "MAP4K4", "GHR", "NTF3", "DACT1", "DUSP6", "PLCB1", "ADORA2B", "FGF2", "TP73", "DUSP16", "FGFR2", "MAPK8IP1", "CAV3", "DVL2", "MAP3K1", "Z…
213	NEGATIVE REGULATION OF CELL PROLIFERATION%GO%GO:0008285	9.44222e-08	1.31526e-06	0.704976	0.334618	2.44451	145	c("SFRP4", "FRZB", "OGN", "SOX4", "SULF1", "IGFBP5", "SFRP1", "JAK2", "BMP4", "PODN", "ALDH1A2", "APOE", "IGFBP3", "NOX4", "PAK1", "TGFB2", "TGFB3", "SCG2", "GPNMB", "LEPREL1", "PKD2", "MYOCD", "TP53INP1", "IRF6", "LEPREL2", "SOX9", "SOX7", "ING4", "WNT9A", "ATPIF1", "MDM4", "APOD", "INHBA", "HLA-DRB1", "GNRH1", "PTPN14", "PTHLH", "EIF2AK2", "ROBO1", "CDKN2B", "GAS8", "KANK2", "MFN2", "ATM", "PTP…
214	NUCLEIC ACID BINDING TRANSCRIPTION FACTOR ACTIVITY%GO%GO:0001071	1.10655e-07	1.53418e-06	0.704976	0.284169	2.22994	228	c("AEBP1", "SOX4", "ESR1", "TCF4", "LEF1", "FOXS1", "CREB5", "DBP", "SOX15", "PLAGL1", "GATA5", "ZFP37", "FOXC2", "ZNF135", "MYOCD", "ZNF91", "RORA", "NR2F1", "ZNF444", "IRF6", "ZNF83", "ZNF277", "HR", "SOX9", "SOX7", "LMO2", "FOXD2", "FOXI2", "HMGB2", "TRIM29", "SOX6", "KLF12", "RFX5", "GATA6", "GABPA", "TCF7L2", "ARNT2", "ZSCAN1", "PURA", "TCFL5", "ZNF175", "MSRB2", "ZSCAN18", "THRA", "PRDM1", …
215	REGULATION OF CELL MIGRATION%GO%GO:0030334	1.1568e-07	1.59638e-06	0.704976	0.334278	2.41608	138	c("THBS4", "SERPINE2", "SULF1", "THY1", "ENPP2", "IGFBP5", "SFRP1", "BMP4", "DPYSL3", "PODN", "APOE", "IGFBP3", "LEF1", "TGFB2", "HDAC9", "HBEGF", "FGF1", "ACE", "VEGFC", "KANK1", "SCARB1", "FOXC2", "MAP2K5", "TP53INP1", "SOX9", "JAM3", "APOD", "AMOT", "IGF1", "EDN3", "NRP1", "RNF20", "THBS3", "NTF3", "NEXN", "BMPR2", "PTGER4", "VTN", "PTPRM", "PLCB1", "SFRP2", "CCL5", "PRKD1", "JAG1", "FGF2", "H…
216	PROTEIN LOCALIZATION TO MEMBRANE%GO%GO:0072657	1.18848e-07	1.6325e-06	0.704976	0.604429	2.85446	26	c("CPE", "AGRN", "NRXN2", "SCN3B", "PACS1", "CAPN3", "SPTBN1", "DLG4", "FGF13", "RAMP2", "ANK1", "SMO", "P2RY1", "FCHO2", "CAV3", "PACSIN1", "NLGN1", "EHD3", "GAS6", "MAGI2", "SCP2")
217	REGULATION OF PROGRAMMED CELL DEATH%GO%GO:0043067	1.25409e-07	1.7147e-06	0.690132	0.252754	2.0844	353	c("SFRP4", "FRZB", "COMP", "HTR2B", "SNCA", "SOX4", "SOCS2", "SFRP1", "JAK2", "BMP4", "HRK", "APOE", "IGFBP3", "LEF1", "TGFB2", "KCNMA1", "IFIT2", "NTRK2", "TGFB3", "PRMT2", "SCG2", "TPD52L1", "BEX2", "BCL2", "TNFSF10", "MLLT11", "PLAGL1", "SOX8", "UNC5B", "NES", "NET1", "CAPN3", "ANKRD1", "ANXA4", "CLIP3", "NUPR1", "MAP2K5", "PLK2", "SOX9", "CRADD", "SOX7", "ING4", "KIAA0141", "GZMA", "CXCR7", "…
218	SECRETION%GO%GO:0046903	1.3133e-07	1.78231e-06	0.690132	0.354402	2.48478	113	c("KIT", "PROS1", "SYTL2", "SLC6A1", "CRHBP", "LEFTY2", "DRD4", "TGFB2", "TGFB3", "LTBP4", "ACE", "SCG2", "BRSK1", "APOA1", "PCSK5", "SCRN1", "VEGFC", "S100A13", "CADPS", "NPPB", "RAB26", "SLC5A7", "VAMP1", "ALDH5A1", "SYTL1", "BTN3A1", "INHBA", "IGF1", "EDN3", "ANK1", "SLC6A12", "CAMK2G", "GUCA1B", "CCL5", "ACTN2", "CLU", "TBX3", "ABAT", "CDK5", "SLC17A7", "VIP", "TPD52", "CD36", "NECAB3", "APLN…
219	ORGANIC CYCLIC COMPOUND BIOSYNTHETIC PROCESS%GO%GO:1901362	1.31732e-07	1.78231e-06	0.690132	0.248385	2.05663	378	c("HTR2B", "SNCA", "ESR1", "POLR1E", "TM7SF2", "RUNX2", "TCF4", "LEF1", "NPPA", "TGFB2", "IVNS1ABP", "CREB5", "NMNAT2", "PLAGL1", "RPS4Y1", "HLF", "TCEA2", "NPPB", "CYP11A1", "RORA", "NR2F1", "ZNF444", "LMO2", "RARB", "AK5", "ATPIF1", "GFPT1", "RAMP2", "PRTFDC1", "NR2C1", "TRIM33", "TRIM29", "CYP46A1", "GATA6", "KLF5", "DDIT3", "NR3C1", "POLR3B", "GABPA", "DCK", "ZSCAN1", "CDKN2B", "TK2", "MED30"…
220	COLLAGEN BIOSYNTHESIS AND MODIFYING ENZYMES%REACTOME%REACT_121139.2	1.32157e-07	1.78231e-06	0.690132	0.514485	2.72926	38	c("TLL2", "COL14A1", "COL16A1", "COL10A1", "COL9A1", "COL21A1", "COL9A2", "COL13A1", "COL8A1", "COL24A1", "COL1A2", "LEPREL1", "PCOLCE2", "COL7A1", "COL8A2", "LEPREL2", "COL3A1", "COL22A1", "COL4A5", "COL19A1")
221	POSITIVE REGULATION OF PHOSPHORYLATION%GO%GO:0042327	1.34108e-07	1.80044e-06	0.690132	0.302527	2.30067	185	c("THBS4", "HTR2B", "PLCE1", "KIT", "SNCA", "CCND1", "JAK2", "BMP4", "MDFIC", "DRD4", "PAK1", "TGFB2", "CHRNA3", "TGFB3", "CCND2", "TPD52L1", "PKD2", "KDELR3", "CXCR4", "CLIP3", "PELI2", "MAP2K5", "SOX9", "TNIK", "FGF13", "FZD7", "GFPT1", "INHBA", "GRB10", "IGF1", "EDN3", "FAM129A", "BMP6", "KIDINS220", "PILRB", "P2RY1", "DDIT3", "NRP1", "GHR", "ALS2", "THBS3", "NTF3", "SEC31A", "PKD1", "BMPR2", …
222	TRANSMEMBRANE SIGNALING RECEPTOR ACTIVITY%GO%GO:0004888	1.38055e-07	1.84509e-06	0.690132	0.289379	2.25405	217	c("SFRP4", "FRZB", "GRIA3", "HTR2B", "FZD2", "KIT", "NPR3", "ANTXR1", "EPHA3", "SFRP1", "EDNRA", "GRM1", "CX3CR1", "PTPRR", "DRD4", "CHRNA3", "NTRK2", "LEPR", "LTBP4", "LPAR4", "ELOVL4", "CRIM1", "DDR1", "BCAM", "PTPRN2", "CXCR4", "PTPRD", "LPHN3", "EDA2R", "FZD1", "P2RY14", "DLG4", "LRP5", "XPR1", "HPGD", "FZD7", "CXCR7", "GRIA1", "SORT1", "TNFRSF25", "EPHB3", "HLA-DRB1", "CCR4", "KLRF1", "SMO",…
223	ORGANIC ACID METABOLIC PROCESS%GO%GO:0006082	1.57024e-07	2.0892e-06	0.690132	0.262609	2.12626	296	c("DIO2", "FMOD", "SLC16A9", "GATM", "OGN", "SULF1", "LUM", "ABCG2", "OMD", "ALDH1A2", "AGRN", "GSTM5", "NOX4", "CHST6", "DDAH1", "SLC27A6", "ACADL", "ASPA", "ELOVL4", "CYP2J2", "CHSY3", "PRELP", "GPC6", "B3GNT2", "EXT1", "CDO1", "RENBP", "CSAD", "SULF2", "LTC4S", "ALDH5A1", "PDK3", "HPGD", "ALDH4A1", "IGF1", "GSTA4", "CPT2", "ST3GAL3", "SDC2", "CYP46A1", "FMO2", "DECR2", "CYP26B1", "ACOT4", "CSP…
224	METAL ION BINDING%GO%GO:0046872	1.73886e-07	2.2874e-06	0.690132	0.274059	2.17628	249	c("THBS4", "COMP", "QPCT", "PDE5A", "SNCA", "MME", "ENPP2", "APOE", "STK38L", "AGRN", "ACE2", "IGFBP3", "LTBP4", "ACE", "ICK", "BRSK1", "SOD3", "S100A6", "MYL7", "MASP1", "APOBEC3G", "CRIP1", "PKD2", "DNASE1L3", "SNRK", "ZFP37", "CAPN3", "PIF1", "S100A13", "APOBEC3F", "HKR1", "ANXA4", "ZNF91", "MAPK12", "EPHX2", "MSRB3", "TSSK6", "GSN", "MYRIP", "MDM4", "PRTFDC1", "TRIM33", "DPF3", "ADAMTS13", "S…
225	REGULATION OF INTRACELLULAR PROTEIN KINASE CASCADE%GO%GO:0010627	1.74059e-07	2.2874e-06	0.690132	0.294672	2.28088	211	c("SFRP4", "HTR2B", "PLCE1", "KIT", "SOCS2", "JAK2", "BMP4", "UCHL1", "ESR1", "MDFIC", "RGS4", "APOE", "STK38L", "DRD4", "PAK1", "TGFB2", "HBEGF", "NTRK2", "FGF1", "TPD52L1", "TNFSF10", "DIXDC1", "MID1", "CAPN3", "CXCR4", "S100A13", "EDA2R", "PELI2", "MAP2K5", "PLK2", "TNIK", "CNKSR3", "FZD7", "TNIP1", "IGF1", "EDN3", "RICTOR", "KIDINS220", "P2RY1", "MAP4K4", "GHR", "TCF7L2", "NTF3", "DACT1", "DU…
226	ORGANONITROGEN COMPOUND BIOSYNTHETIC PROCESS%GO%GO:1901566	1.74234e-07	2.2874e-06	0.690132	0.302162	2.29669	184	c("FMOD", "ST8SIA2", "GATM", "HTR2B", "SNCA", "OGN", "LUM", "OMD", "SLC44A5", "AGRN", "ST8SIA5", "NPPA", "TGFB2", "CHST6", "CHSY3", "PRELP", "APOA1", "GPC6", "ST8SIA4", "NMNAT2", "PCSK5", "B3GNT2", "EXT1", "CDO1", "HAS3", "NPPB", "LTC4S", "SLC44A1", "ADC", "AK5", "ATPIF1", "RAMP2", "PRTFDC1", "COL4A3BP", "ST3GAL3", "SDC2", "ODC1", "CSPG5", "DCK", "CHST14", "TK2", "BDH2", "GLCE", "GAMT", "ADCY2", …
227	AROMATIC COMPOUND BIOSYNTHETIC PROCESS%GO%GO:0019438	1.86532e-07	2.43806e-06	0.690132	0.251613	2.0685	340	c("HTR2B", "SNCA", "ESR1", "POLR1E", "RUNX2", "TCF4", "LEF1", "NPPA", "TGFB2", "IVNS1ABP", "CREB5", "NMNAT2", "PLAGL1", "RPS4Y1", "HLF", "TCEA2", "NPPB", "RORA", "NR2F1", "ZNF444", "LMO2", "RARB", "AK5", "ATPIF1", "GFPT1", "RAMP2", "PRTFDC1", "NR2C1", "TRIM33", "TRIM29", "GATA6", "KLF5", "DDIT3", "NR3C1", "POLR3B", "GABPA", "DCK", "ZSCAN1", "CDKN2B", "TK2", "MED30", "TCFL5", "ZSCAN18", "BAZ2B", "…
228	EXTRACELLULAR MATRIX ORGANIZATION%GO%GO:0030198	1.921e-07	2.48892e-06	0.690132	0.424357	2.64163	66	c("SNCA", "COL14A1", "SULF1", "COL16A1", "COL10A1", "LUM", "COL9A1", "TIMP2", "COL21A1", "TGFB2", "COL9A2", "FOXS1", "MYH11", "COL13A1", "COL8A1", "COL24A1", "COL1A2", "LEPREL1", "FOXC2", "COL7A1", "SULF2", "COL8A2", "LEPREL2", "COL3A1", "RAMP2", "COL22A1", "COL4A5")
229	EXTRACELLULAR STRUCTURE ORGANIZATION%GO%GO:0043062	1.921e-07	2.48892e-06	0.690132	0.424357	2.64163	66	c("SNCA", "COL14A1", "SULF1", "COL16A1", "COL10A1", "LUM", "COL9A1", "TIMP2", "COL21A1", "TGFB2", "COL9A2", "FOXS1", "MYH11", "COL13A1", "COL8A1", "COL24A1", "COL1A2", "LEPREL1", "FOXC2", "COL7A1", "SULF2", "COL8A2", "LEPREL2", "COL3A1", "RAMP2", "COL22A1", "COL4A5")
230	CELLULAR COMPONENT BIOGENESIS%GO%GO:0044085	1.9707e-07	2.5422e-06	0.690132	0.239969	1.99927	398	c("FMOD", "KIT", "THY1", "CENPA", "JAK2", "DPYSL3", "FARP1", "CC2D2A", "APOE", "TCF4", "NRXN2", "HIST1H2AC", "FSCN1", "CHRNA3", "MYH11", "RAB23", "COLEC12", "APOA1", "TTC8", "KIF13A", "CAPN3", "INTU", "RYR3", "PTPRD", "CDH6", "CLIP3", "LIMA1", "SPTBN1", "DLG4", "ALDH5A1", "APOM", "SOX9", "TP53INP2", "SHANK1", "FGF13", "GSN", "ATPIF1", "MDM4", "AMOT", "HMGB2", "BICD1", "HLA-DRB1", "RAMP2", "TTC26"…
231	RNA METABOLIC PROCESS%GO%GO:0016070	2.05501e-07	2.63948e-06	0.690132	0.23545	1.98869	451	c("ESR1", "POLR1E", "RUNX2", "TCF4", "LEF1", "NPPA", "IVNS1ABP", "CREB5", "APOBEC3G", "PLAGL1", "RPS4Y1", "HLF", "TCEA2", "APOBEC3F", "RORA", "NR2F1", "PIWIL4", "ZNF444", "LMO2", "RBMS2", "RARB", "SYF2", "MAEL", "BICD1", "NR2C1", "TRIM33", "TRIM29", "PSIP1", "GATA6", "KLF5", "PPIL3", "DDIT3", "NR3C1", "POLR3B", "ANP32A", "GABPA", "ZSCAN1", "CDKN2B", "MED30", "PPIG", "TCFL5", "ZSCAN18", "BAZ2B", "…
232	HEART DEVELOPMENT%GO%GO:0007507	2.06487e-07	2.64072e-06	0.690132	0.365011	2.507	103	c("HTR2B", "PLCE1", "SOX4", "BMP4", "CPE", "TGFB2", "HDAC9", "FOXS1", "MYH11", "PCSK5", "CRIP1", "PKD2", "ANKRD1", "FOXC2", "PTPN11", "MYOCD", "SOX9", "DAND5", "TNNI3", "COL3A1", "RAMP2", "SMO", "GATA6", "BBS4", "PKD1", "STIL", "CSRP3", "ALPK3", "SFRP2", "CBY1", "BAZ1B", "JAG1", "SHOX2", "NPHP3", "FGFR2", "DVL2", "MEF2C", "DVL3", "RBM20", "BMPR1A", "MESP1", "PROX1", "SMAD7", "FOXP1", "BCOR", "NAC…
233	VASCULATURE DEVELOPMENT%GO%GO:0001944	2.1034e-07	2.67845e-06	0.690132	0.364084	2.51334	105	c("SFRP4", "FRZB", "FZD2", "SOX4", "THY1", "SFRP1", "BMP4", "LEF1", "TGFB2", "FOXS1", "SCG2", "ESM1", "COL1A2", "PLXDC1", "PKD2", "MCAM", "FOXC2", "FZD1", "LRP5", "HPGD", "FZD7", "GPR124", "TNNI3", "ATPIF1", "JAM3", "APOD", "EPHB3", "RAMP2", "PTPN14", "SMO", "GATA6", "TCF7L2", "ROBO1", "PKD1", "BMPR2", "FZD6", "SFRP2", "EFNB2", "JAG1", "FGF2", "FGFR2", "FZD3", "MEF2C", "E2F8", "SIRT1")
234	REGULATION OF NEURON DIFFERENTIATION%GO%GO:0045664	2.18739e-07	2.76831e-06	0.690132	0.392578	2.59126	84	c("EPHA3", "THY1", "DPYSL3", "APOE", "TCF4", "CHN1", "CNTN4", "CHRNA3", "NTRK2", "ZEB1", "DIXDC1", "KANK1", "SIPA1L1", "CAMK2B", "PTPRD", "LRRC4C", "SOX9", "TNIK", "FGF13", "EPHB3", "SDC2", "SARM1", "VWC2", "ROBO1", "PRKD1", "ISLR2", "RTN4R", "ID2", "MEF2C", "CDK5", "CDK5RAP2", "PACSIN1", "MAPT", "CBFA2T2", "NLGN1", "COBL", "ITM2C", "PROX1", "HES5", "LINGO1", "RAP2A", "LRRK2", "REST", "DMD", "FRM…
235	POSITIVE REGULATION OF CELL PROLIFERATION%GO%GO:0008284	2.19263e-07	2.76831e-06	0.690132	0.314347	2.32583	157	c("THBS4", "HTR2B", "SOX4", "PTN", "TNFRSF4", "SFRP1", "BMP4", "LEF1", "TGFB2", "CTF1", "NTRK2", "GLI1", "FGF1", "DPP4", "SCG2", "S100A6", "BCL2", "SOX15", "SOX8", "VEGFC", "NES", "CD47", "LRP5", "GAB2", "SOX9", "FZD7", "BAMBI", "HMGB2", "IGF1", "BMP6", "TRPM4", "SMO", "VCAM1", "NRP1", "THBS3", "NTF3", "ICOSLG", "BMPR2", "SFRP2", "CCL5", "PRKD1", "FGF2", "HDAC4", "NAP1L1", "FGFR1OP", "PDGFC", "AR…
236	HETEROCYCLE BIOSYNTHETIC PROCESS%GO%GO:0018130	2.39348e-07	3.0091e-06	0.674963	0.248386	2.04235	341	c("HTR2B", "ESR1", "POLR1E", "RUNX2", "TCF4", "LEF1", "NPPA", "IVNS1ABP", "CREB5", "NMNAT2", "PLAGL1", "RPS4Y1", "HLF", "TCEA2", "NPPB", "RORA", "NR2F1", "ZNF444", "LMO2", "RARB", "AK5", "ATPIF1", "GFPT1", "RAMP2", "PRTFDC1", "NR2C1", "TRIM33", "TRIM29", "GATA6", "KLF5", "DDIT3", "NR3C1", "POLR3B", "GABPA", "DCK", "ZSCAN1", "CDKN2B", "TK2", "MED30", "TCFL5", "ZSCAN18", "BAZ2B", "BMPR2", "SUPT3H",…
237	POSITIVE REGULATION OF CELLULAR PROTEIN METABOLIC PROCESS%GO%GO:0032270	2.47821e-07	3.10246e-06	0.674963	0.268968	2.15556	266	c("THBS4", "HTR2B", "PLCE1", "KIT", "SNCA", "SOX4", "CCND1", "JAK2", "BMP4", "MDFIC", "APOE", "DRD4", "PAK1", "TGFB2", "CHRNA3", "TGFB3", "CCND2", "TPD52L1", "PKD2", "KDELR3", "CAPN3", "CXCR4", "PRICKLE1", "CLIP3", "PELI2", "MAP2K5", "PERP", "SOX9", "SAMD4A", "TNIK", "FGF13", "GFPT1", "INHBA", "BTRC", "IGF1", "EDN3", "PLK3", "FAM129A", "BMP6", "KIDINS220", "PILRB", "P2RY1", "DDIT3", "NRP1", "GHR"…
238	REGULATION OF APOPTOTIC PROCESS%GO%GO:0042981	2.52057e-07	3.14224e-06	0.674963	0.250819	2.06529	349	c("SFRP4", "FRZB", "COMP", "HTR2B", "SNCA", "SOX4", "SOCS2", "SFRP1", "JAK2", "BMP4", "HRK", "APOE", "IGFBP3", "LEF1", "TGFB2", "KCNMA1", "IFIT2", "NTRK2", "TGFB3", "PRMT2", "SCG2", "TPD52L1", "BEX2", "BCL2", "TNFSF10", "MLLT11", "PLAGL1", "SOX8", "UNC5B", "NES", "NET1", "CAPN3", "ANKRD1", "ANXA4", "CLIP3", "NUPR1", "MAP2K5", "PLK2", "SOX9", "CRADD", "SOX7", "ING4", "KIAA0141", "GZMA", "CXCR7", "…
239	REGULATION OF MUSCLE CELL DIFFERENTIATION%GO%GO:0051147	2.53964e-07	3.15276e-06	0.674963	0.503864	2.69468	39	c("BMP4", "BOC", "AGRN", "IGFBP3", "HDAC9", "SOX8", "MYOCD", "MAPK12", "SOX9", "PLCB1", "EFNB2", "HDAC5", "HDAC4", "FGFR2", "TBX3", "CAV3", "MEF2C", "DDX17", "GPC1", "MESP1", "PROX1", "HDAC3", "NACA", "HIF1AN", "MEF2A", "FOXO4", "CTNNB1", "RBM24")
240	REGULATION OF WNT RECEPTOR SIGNALING PATHWAY%GO%GO:0030111	2.75046e-07	3.40026e-06	0.674963	0.385302	2.55483	86	c("SFRP4", "FRZB", "SOX4", "SULF1", "SFRP1", "MDFIC", "DKK2", "LEF1", "GLI1", "DIXDC1", "KANK1", "DACT3", "SULF2", "PRICKLE1", "FZD1", "LRP5", "WNT2B", "SOX9", "CXXC4", "SOX7", "BAMBI", "GRB10", "TRPM4", "DDIT3", "SIAH2", "TCF7L2", "DACT1", "RNF146", "FZD6", "SFRP2", "CBY1", "MACF1", "NPHP3", "DAPK3", "FGFR2", "TAX1BP3", "MDFI", "MED12", "PPP2R3A", "APC", "MESP1", "NKD1", "DKK3", "HHEX", "TNKS", …
241	REGULATION OF RAS PROTEIN SIGNAL TRANSDUCTION%GO%GO:0046578	2.81369e-07	3.46399e-06	0.674963	0.426714	2.6086	61	c("PLCE1", "EPHA3", "SFRP1", "APOE", "AGRN", "NTRK2", "APOA1", "RABGAP1L", "KANK1", "NET1", "SIPA1L1", "ALDH1A1", "EPHB3", "IGF1", "RALBP1", "ALS2", "NTF3", "LLGL1", "MFN2", "FGD5", "TSC1", "RASAL2", "TAX1BP3", "SYNGAP1", "ARHGEF2", "TBC1D15", "F2R", "EPHA5", "PLXNB2", "ARRB1", "USP6NL", "FGD6", "SQSTM1", "RASGRP3", "RAB3GAP1", "ARHGAP29", "SRGAP2", "TBC1D7")
242	Wnt signaling pathway%KEGG%hsa04310	2.83137e-07	3.4698e-06	0.674963	0.417258	2.61146	67	c("SFRP4", "FZD2", "CCND1", "SFRP1", "DKK2", "LEF1", "CCND2", "PRICKLE2", "CAMK2B", "PRICKLE1", "FZD1", "LRP5", "WNT2B", "CXXC4", "FZD7", "WNT9A", "BTRC", "TCF7L2", "CAMK2G", "PPP2R1B", "TBL1XR1", "FZD6", "PLCB1", "SFRP2", "PLCB4", "FZD3", "DVL2", "FBXW11", "CAMK2A", "DVL3", "WIF1", "EP300", "MAPK10", "APC", "CSNK2A2", "CAMK2D", "ROCK1", "NKD1", "PRKCA", "MAP3K7", "RBX1")
243	MULTICELLULAR ORGANISMAL SIGNALING%GO%GO:0035637	2.85946e-07	3.4698e-06	0.674963	0.284922	2.21933	217	c("KCNA5", "GRIA3", "SNCA", "MBP", "SCN2B", "KCNN3", "SLC6A1", "APOE", "AGRN", "AP3M2", "CRHBP", "GRM1", "BDNF", "KCNMB1", "DRD4", "AMPH", "KCNMA1", "GNB3", "CHRNA3", "GLRB", "GABRB1", "KCNS3", "ABCC8", "SCN3B", "SCN4B", "BRSK1", "KCNAB1", "RAPSN", "KCNA4", "KCNC4", "KCNK6", "CXCR4", "CAMK2B", "KCNMB4", "SLC5A7", "KCNIP1", "VAMP1", "DLG4", "ALDH5A1", "SHANK1", "FRMPD4", "KCNMB2", "GRIA1", "CACNA1…
244	REGULATION OF KINASE ACTIVITY%GO%GO:0043549	2.86519e-07	3.4698e-06	0.674963	0.294234	2.25584	194	c("HTR2B", "PLCE1", "KIT", "SNCA", "THY1", "CCND1", "PIK3IP1", "JAK2", "BMP4", "UCHL1", "MDFIC", "RGS4", "APOE", "STK38L", "DRD4", "PAK1", "TGFB2", "HERC5", "CHRNA3", "GADD45A", "CCND2", "TPD52L1", "PKD2", "PIK3R1", "KDELR3", "CXCR4", "MYOCD", "MAP2K5", "LRP5", "TNIK", "FGF13", "GFPT1", "EDN3", "KIDINS220", "PILRB", "DDIT3", "SOCS4", "GHR", "ALS2", "NTF3", "CDKN2B", "SEC31A", "PKD1", "DUSP6", "AD…
245	REGULATION OF PROTEIN KINASE ACTIVITY%GO%GO:0045859	2.86519e-07	3.4698e-06	0.674963	0.298896	2.27186	184	c("HTR2B", "PLCE1", "KIT", "SNCA", "THY1", "CCND1", "JAK2", "BMP4", "UCHL1", "MDFIC", "RGS4", "APOE", "STK38L", "DRD4", "PAK1", "TGFB2", "HERC5", "CHRNA3", "GADD45A", "CCND2", "TPD52L1", "PKD2", "KDELR3", "CXCR4", "MYOCD", "MAP2K5", "LRP5", "TNIK", "FGF13", "GFPT1", "EDN3", "KIDINS220", "PILRB", "DDIT3", "SOCS4", "GHR", "ALS2", "NTF3", "CDKN2B", "SEC31A", "PKD1", "DUSP6", "ADCY2", "ADORA2B", "FGF…
246	REGULATION OF SKELETAL MUSCLE TISSUE DEVELOPMENT%GO%GO:0048641	2.89461e-07	3.49119e-06	0.674963	0.614422	2.73516	22	c("BMP4", "BOC", "AGRN", "IGFBP3", "HDAC9", "SOX8", "MYOCD", "SOX9", "PLCB1", "HDAC5", "HDAC4", "TBX3", "MEF2C", "DDX17", "GPC1", "HDAC3", "NACA", "HIF1AN", "RBM24")
247	MUSCLE ORGAN DEVELOPMENT%GO%GO:0007517	3.18915e-07	3.82642e-06	0.674963	0.419508	2.64834	69	c("AEBP1", "MYL1", "SGCE", "EVC", "CTF1", "HBEGF", "FOXS1", "MSTN", "CHODL", "LAMA2", "CAPN3", "ANKRD1", "FOXC2", "SVIL", "MKX", "SGCG", "MAPK12", "TNNI3", "SORT1", "IGF1", "SOX6", "MRAS", "NEB", "CSRP3", "FHL1", "FGFR2", "CAV3", "MEF2C", "TRIM72", "SGCA", "TCF12", "PROX1", "F2R", "SMAD7", "MYL6B", "FOXP1", "PKP2", "LRRK2", "DMD", "MEF2A", "RYR2", "FOXP2", "MEF2D")
248	CELLULAR PROTEIN LOCALIZATION%GO%GO:0034613	3.19835e-07	3.82642e-06	0.674963	0.278904	2.18655	225	c("CENPA", "JAK2", "BMP4", "NDC80", "CPE", "AGRN", "NRXN2", "TGFB2", "IFIT1", "RASSF9", "SCN3B", "COPZ2", "PKD2", "KIF13A", "RPS4Y1", "SCG5", "PACS1", "CAPN3", "PRICKLE1", "PDIA2", "RAB26", "PPP1R10", "SPTBN1", "DLG4", "SHANK1", "RTP4", "FGF13", "AMOT", "BICD1", "RAMP2", "ANK1", "COG7", "TPR", "SMO", "P2RY1", "PEX7", "CEP57", "FCHO2", "BBS1", "BBS4", "PKD1", "MFN2", "CSRP3", "TRAK1", "PEX1", "VPS…
249	POSITIVE REGULATION OF GTPASE ACTIVITY%GO%GO:0043547	4.11019e-07	4.89756e-06	0.674963	0.444543	2.63831	56	c("THY1", "SFRP1", "RGS4", "AGRN", "RGS11", "RGS5", "RABGAP1L", "NET1", "SIPA1L1", "DOCK1", "ALDH1A1", "RGS17", "RGS6", "RALBP1", "RABGAP1", "ALS2", "NTF3", "LLGL1", "CHN2", "PLCB1", "TSC1", "RASAL2", "TAX1BP3", "SYNGAP1", "ARHGEF6", "SNX13", "ELMOD2", "RGS3", "ARRB1", "USP6NL", "LRRK2", "RASGRP3", "RAB3GAP1", "ARHGAP29", "SRGAP2", "TBC1D7")
250	MUSCLE CELL DIFFERENTIATION%GO%GO:0042692	4.49334e-07	5.3327e-06	0.674963	0.447685	2.60223	51	c("BMP4", "BOC", "MYOZ1", "LEF1", "MYH11", "SOX15", "CAPN3", "ANKRD1", "MYOCD", "MAPK12", "SORT1", "IGF1", "RAMP2", "SMO", "GATA6", "FBXO40", "TCF7L2", "CSRP3", "CBY1", "JAG1", "IFRD1", "CAV3", "MEF2C", "OBSCN", "MYPN", "MESP1", "PROX1", "F2R", "FOXP1", "LRRK2", "MEF2A", "GATA4", "CTNNB1", "OBSL1", "SLC8A1", "VEGFA")
251	GOLGI APPARATUS%GO%GO:0005794	4.55518e-07	5.38368e-06	0.674963	0.250352	2.03915	315	c("FMOD", "ST8SIA2", "KCNA5", "OGN", "PROS1", "SULF1", "SYTL2", "LUM", "OMD", "MDFIC", "CPE", "PDGFD", "AGRN", "CRHBP", "PAK1", "CHST6", "SH3GL2", "RASSF9", "KCNS3", "CHSY3", "PRELP", "GPC6", "ST8SIA4", "NMNAT2", "RABGAP1L", "PCSK5", "B3GNT2", "CA4", "COPZ2", "LEPREL1", "EXT1", "RAB26", "EPHX2", "PERP", "DOPEY1", "MGAT3", "SDPR", "SCAMP5", "VPS41", "SORT1", "HLA-DRB5", "HLA-DRB1", "COL4A3BP", "PL…
252	EXTRACELLULAR MATRIX PART%GO%GO:0044420	4.57259e-07	5.38368e-06	0.674963	0.481467	2.70207	45	c("THBS4", "SNCA", "COL14A1", "COL16A1", "MFAP4", "LUM", "COL9A1", "AGRN", "APLP1", "COL9A2", "COL13A1", "COL8A1", "COL1A2", "LEPREL1", "LAMA2", "COL7A1", "COL8A2", "LAMA4", "COL3A1", "THBS3", "EFEMP2", "COL19A1", "DST")
253	MITOCHONDRION%GO%GO:0005739	4.64032e-07	5.44183e-06	0.674963	0.233288	1.96051	423	c("GATM", "SOX4", "PPP2R2B", "SPATA18", "HRK", "BFSP1", "ACADL", "SOD3", "BCL2", "APOBEC3G", "RSAD2", "UACA", "FRMD6", "UCP2", "CYP11A1", "FAM110B", "ALDH5A1", "CA5B", "TRAK2", "PDK3", "MSRB3", "KIAA0141", "ATPIF1", "ALDH4A1", "CPT2", "CASQ1", "CBR4", "PTCD2", "CPT1B", "NR3C1", "SARM1", "KIAA1683", "OMA1", "ACSS1", "SLC25A27", "TK2", "BDH2", "BCL2L11", "SLC25A30", "IVD", "MSRB2", "KANK2", "NNT", …
254	OXOACID METABOLIC PROCESS%GO%GO:0043436	4.72546e-07	5.50372e-06	0.674963	0.257231	2.08025	292	c("DIO2", "FMOD", "GATM", "OGN", "SULF1", "LUM", "OMD", "ALDH1A2", "AGRN", "GSTM5", "NOX4", "CHST6", "DDAH1", "SLC27A6", "ACADL", "ASPA", "ELOVL4", "CYP2J2", "CHSY3", "PRELP", "GPC6", "B3GNT2", "EXT1", "CDO1", "RENBP", "CSAD", "SULF2", "LTC4S", "ALDH5A1", "PDK3", "HPGD", "ALDH4A1", "IGF1", "GSTA4", "CPT2", "ST3GAL3", "SDC2", "CYP46A1", "DECR2", "CYP26B1", "ACOT4", "CSPG5", "GSTO2", "SULT1C4", "HE…
255	REGULATION OF TRANSFERASE ACTIVITY%GO%GO:0051338	4.73019e-07	5.50372e-06	0.674963	0.284934	2.19377	202	c("HTR2B", "PLCE1", "KIT", "SNCA", "THY1", "CCND1", "PIK3IP1", "JAK2", "BMP4", "UCHL1", "MDFIC", "RGS4", "APOE", "STK38L", "DRD4", "PAK1", "TGFB2", "HERC5", "CHRNA3", "GADD45A", "CCND2", "TPD52L1", "PKD2", "PIK3R1", "KDELR3", "CXCR4", "PIF1", "MYOCD", "MAP2K5", "LRP5", "TNIK", "FGF13", "GFPT1", "EDN3", "KIDINS220", "PILRB", "DDIT3", "SOCS4", "GHR", "ALS2", "NTF3", "CDKN2B", "SEC31A", "PKD1", "DUS…
256	Metabolic pathways%KEGG%hsa01100	4.81061e-07	5.56484e-06	0.659444	0.223831	1.90019	473	c("GATM", "PLCE1", "EXTL1", "OGDHL", "ALDH1A2", "POLR1E", "TM7SF2", "DGKI", "ST8SIA5", "ACADL", "CYP2J2", "CHSY3", "ATP6V1G2", "PAFAH2", "INPP4B", "NMNAT2", "B3GNT2", "EXT1", "CDO1", "TYRP1", "ALDH1A1", "CSAD", "NT5C2", "AMT", "CBR3", "HYI", "LTC4S", "CYP11A1", "ST6GALNAC1", "EPHX2", "ALDH5A1", "AGPAT4", "ST6GAL2", "PIK3C2B", "MGAT3", "ASAH1", "ADC", "AK5", "GFPT1", "ALDH4A1", "LIPT1", "ENO2", "N…
257	CYTOPLASMIC MEMBRANE-BOUNDED VESICLE%GO%GO:0016023	4.82024e-07	5.56484e-06	0.659444	0.287773	2.2049	193	c("GRIA3", "SERPINE2", "SNCA", "MME", "PROS1", "SYTL2", "DPYSL3", "SGIP1", "CPE", "CRHBP", "LEFTY2", "AMPH", "TGFB2", "SH3GL2", "TGFB3", "RASSF9", "DPP4", "RAB23", "BRSK1", "APOA1", "PCSK5", "CA4", "COPZ2", "VEGFC", "TYRP1", "MYO5B", "SCG5", "SSPN", "CXCR4", "CAMK2B", "RAB26", "VAMP1", "DLG4", "VPS41", "SYTL1", "MYRIP", "GRIA1", "SORT1", "ANP32E", "HLA-DRB5", "AMOT", "IGF1", "HLA-DRB1", "CSPG5", …
258	INTEGRIN BINDING%GO%GO:0005178	4.9935e-07	5.74252e-06	0.659444	0.560785	2.72419	28	c("THBS4", "COL16A1", "ECM2", "THY1", "EDIL3", "LTBP4", "ADAM22", "JAM3", "IGF1", "COL3A1", "ADAMTS13", "VCAM1", "THBS3", "VTN", "SFRP2", "ACTN2", "DST")
259	MACROMOLECULE CATABOLIC PROCESS%GO%GO:0009057	5.06603e-07	5.80344e-06	0.659444	0.263122	2.11132	267	c("FMOD", "OGN", "LUM", "SFRP1", "SPATA18", "OMD", "AGRN", "ACE2", "HERC5", "ACE", "TPD52L1", "PRELP", "ENC1", "GPC6", "HECW2", "UBE2H", "RPS4Y1", "XPC", "HERC6", "FBXL14", "RNF103", "RNF217", "GZMA", "BTRC", "ATXN3", "HMGB2", "SDC2", "CSPG5", "DDIT3", "HECTD2", "FBXO8", "RNF20", "HEXB", "OMA1", "SIAH2", "FBXO4", "IDS", "FBXO31", "TBL1XR1", "RNF146", "RNASEH2B", "ATM", "CRBN", "EXOSC7", "FGF2", "…
260	RESPONSE TO ABIOTIC STIMULUS%GO%GO:0009628	5.25205e-07	5.9934e-06	0.659444	0.299856	2.26296	178	c("HTR2B", "KIT", "MME", "CCND1", "SFRP1", "TGFB2", "KCNMA1", "SCARA3", "TGFB3", "GADD45A", "FGF1", "DPP4", "ELOVL4", "PLEKHB1", "BRSK1", "BCL2", "CRIP1", "PKD2", "NET1", "CAPN3", "ANKRD1", "CXCR4", "PKD1L1", "PDIA2", "MYOCD", "WTIP", "SOX9", "PDK3", "CRADD", "DNAH1", "EYA1", "MDM4", "COL3A1", "CRY2", "PLK3", "PSIP1", "TPR", "GATA6", "ARNT2", "ICOSLG", "MSH2", "PKD1", "PTGER4", "ATM", "CSRP3", "P…
261	BONE DEVELOPMENT%GO%GO:0060348	5.50022e-07	6.25255e-06	0.659444	0.585219	2.68504	24	c("FREM1", "SULF1", "BMP4", "EVC", "COL13A1", "RAB23", "SULF2", "LRP5", "SOX9", "IGF1", "CYP26B1", "PTGER4", "FGFR2", "MEF2C", "FGFR3", "DDR2")
262	CELLULAR COMPONENT ASSEMBLY%GO%GO:0022607	6.00259e-07	6.79759e-06	0.659444	0.239605	1.98469	379	c("FMOD", "KIT", "THY1", "CENPA", "JAK2", "DPYSL3", "FARP1", "CC2D2A", "APOE", "TCF4", "NRXN2", "HIST1H2AC", "FSCN1", "CHRNA3", "MYH11", "RAB23", "COLEC12", "APOA1", "TTC8", "KIF13A", "CAPN3", "INTU", "RYR3", "PTPRD", "CDH6", "LIMA1", "SPTBN1", "DLG4", "ALDH5A1", "APOM", "SOX9", "TP53INP2", "SHANK1", "FGF13", "GSN", "ATPIF1", "MDM4", "AMOT", "HMGB2", "BICD1", "HLA-DRB1", "RAMP2", "TTC26", "HIST1H…
263	REGULATION OF CELL MORPHOGENESIS%GO%GO:0022604	6.30515e-07	7.11307e-06	0.659444	0.358798	2.42984	95	c("KIT", "EPHA3", "THY1", "SFRP1", "APOE", "LEF1", "TGFB2", "CHN1", "CHRNA3", "NTRK2", "TGFB3", "DIXDC1", "FMNL3", "KANK1", "SIPA1L1", "CAMK2B", "ZNF135", "PTPRD", "WTIP", "MYO10", "LRRC4C", "TNIK", "FGF13", "EPHB3", "BAMBI", "SDC2", "SARM1", "TCF7L2", "ROBO1", "BBS4", "SFRP2", "FGD5", "ISLR2", "RTN4R", "ZMYM4", "CDK5", "MAPT", "PHIP", "LINGO1", "RAP2A", "SMAD7", "SH3D19", "PLXNB2", "FGD6", "LRRK…
264	REGULATION OF SEQUENCE-SPECIFIC DNA BINDING TRANSCRIPTION FACTOR ACTIVITY%GO%GO:0051090	6.49972e-07	7.3048e-06	0.659444	0.336509	2.37558	119	c("SFRP4", "FZD2", "KIT", "TNFRSF4", "ESR1", "TCEAL7", "FOXS1", "PRMT2", "BEX1", "CAPN3", "FOXC2", "MYOCD", "EDA2R", "FZD1", "MAP2K5", "FOXD2", "FOXI2", "BTRC", "SMO", "DDIT3", "TCF7L2", "FZD6", "PRKD1", "WWP2", "HDAC5", "HDAC4", "NR0B2", "CLU", "AR", "ID2", "DVL2", "CAMK2A", "UBB", "ERC1", "COMMD6", "PPARGC1A", "SIRT1", "DDR2", "EP300", "ARHGEF2", "STK36", "MAPK10", "PROX1", "CREBZF", "PSMD10", …
265	REGULATION OF STRIATED MUSCLE CELL DIFFERENTIATION%GO%GO:0051153	6.55234e-07	7.33615e-06	0.659444	0.544675	2.70892	30	c("BMP4", "BOC", "AGRN", "IGFBP3", "HDAC9", "SOX8", "MYOCD", "SOX9", "PLCB1", "EFNB2", "HDAC5", "HDAC4", "TBX3", "CAV3", "MEF2C", "DDX17", "GPC1", "MESP1", "PROX1", "HDAC3", "NACA", "HIF1AN", "RBM24")
266	PROTEIN BINDING TRANSCRIPTION FACTOR ACTIVITY%GO%GO:0000988	6.6971e-07	7.47004e-06	0.659444	0.285039	2.18395	193	c("SOX4", "PRRX1", "TCF4", "CRYM", "HDAC9", "PRMT2", "DYRK1B", "ZEB1", "PER2", "ANKRD1", "MYOCD", "NR2F1", "HSF4", "LMO2", "ING4", "SP4", "MKL2", "CRY2", "PSMC3IP", "PTPN14", "KLF12", "SMARCA2", "PSIP1", "DDIT3", "RNF20", "SIAH2", "DNMT3B", "GABPA", "SUB1", "ZSCAN1", "MED30", "ID4", "TBL1XR1", "SUPT3H", "ELK3", "SMARCC2", "NAB2", "FGF2", "ZHX1", "NR0B2", "JAZF1", "TAF1", "DDX17", "ZNF85", "SS18",…
267	CELLULAR MACROMOLECULE LOCALIZATION%GO%GO:0070727	6.854e-07	7.61081e-06	0.659444	0.276305	2.16519	226	c("CENPA", "JAK2", "BMP4", "NDC80", "CPE", "AGRN", "NRXN2", "TGFB2", "IFIT1", "RASSF9", "SCN3B", "COPZ2", "PKD2", "KIF13A", "RPS4Y1", "SCG5", "PACS1", "CAPN3", "PRICKLE1", "PDIA2", "RAB26", "PPP1R10", "SPTBN1", "DLG4", "SHANK1", "RTP4", "FGF13", "AMOT", "BICD1", "RAMP2", "ANK1", "COG7", "TPR", "SMO", "P2RY1", "PEX7", "CEP57", "FCHO2", "BBS1", "BBS4", "PKD1", "MFN2", "CSRP3", "TRAK1", "PEX1", "VPS…
268	POSITIVE REGULATION OF PROTEIN PHOSPHORYLATION%GO%GO:0001934	6.87461e-07	7.61081e-06	0.659444	0.298783	2.25487	178	c("THBS4", "HTR2B", "PLCE1", "KIT", "SNCA", "CCND1", "JAK2", "BMP4", "MDFIC", "DRD4", "PAK1", "TGFB2", "CHRNA3", "TGFB3", "CCND2", "TPD52L1", "PKD2", "KDELR3", "CXCR4", "CLIP3", "PELI2", "MAP2K5", "SOX9", "TNIK", "FGF13", "GFPT1", "INHBA", "IGF1", "EDN3", "FAM129A", "BMP6", "KIDINS220", "PILRB", "P2RY1", "DDIT3", "NRP1", "GHR", "ALS2", "THBS3", "NTF3", "SEC31A", "PKD1", "BMPR2", "VTN", "SFRP2", "…
269	MAPK signaling pathway%KEGG%hsa04010	7.29154e-07	8.04237e-06	0.659444	0.375438	2.50567	89	c("HSPA2", "BDNF", "PTPRR", "PAK1", "TGFB2", "NTRK2", "TGFB3", "GADD45A", "FGF1", "CACNA2D2", "FGF18", "RRAS2", "CACNA2D1", "MAPK12", "MAP2K5", "FGF13", "RASGRP1", "CACNA1B", "HSPA1L", "DDIT3", "MAP4K4", "STMN1", "NTF3", "DUSP6", "MRAS", "FGF2", "RRAS", "DUSP16", "FGFR2", "MAPK8IP1", "MEF2C", "MAP3K1", "FGFR3", "FGF9", "MAP3K12", "SOS2", "MAPT", "DUSP8", "CACNA1D", "PPM1B", "MAPK10", "ARRB1", "RA…
270	METABOLISM OF LIPIDS AND LIPOPROTEINS%REACTOME%REACT_22258.2	7.45e-07	8.18672e-06	0.659444	0.278021	2.16558	217	c("APOE", "SLC44A5", "TM7SF2", "ARSJ", "ACADL", "ELOVL4", "CYP2J2", "APOA1", "INPP4B", "PIK3R1", "TIAM2", "ANKRD1", "LTC4S", "CYP11A1", "RGL1", "SLC44A1", "RORA", "EPHX2", "AGPAT4", "HPGD", "PIK3C2B", "ASAH1", "ARSD", "CPT2", "MBOAT2", "CYP46A1", "CPT1B", "HEXB", "PLA2G4C", "MED30", "AGPAT9", "CYP2U1", "TBL1XR1", "PIP4K2B", "ABCB4", "COQ5", "MTMR4", "OXCT1", "PRKAA2", "ARSG", "PRKD1", "LCAT", "SR…
271	CELLULAR RESPONSE TO ENDOGENOUS STIMULUS%GO%GO:0071495	7.79836e-07	8.5379e-06	0.659444	0.281122	2.18457	214	c("FMOD", "SNCA", "SOCS2", "IGFBP5", "SFRP1", "JAK2", "BMP4", "PDE1A", "GDF10", "CRHBP", "RUNX2", "LEFTY2", "TGFB2", "GDF15", "GNB3", "HDAC9", "APLP1", "FOXS1", "TGFB3", "FGF1", "FGF18", "ATP6V1G2", "COL1A2", "PDE1C", "PIK3R1", "ANKRD1", "FOXC2", "USP9Y", "RYR3", "PTPN11", "GNG11", "PPP1R15A", "SOX9", "LMO2", "HPGD", "GRB10", "COL3A1", "UBR1", "RICTOR", "GAB1", "TRIM33", "PDE3B", "SOX6", "GHR", "…
272	WOUND HEALING%GO%GO:0042060	8.0621e-07	8.79421e-06	0.659444	0.283215	2.1803	200	c("PDE5A", "PROS1", "F2RL2", "JAK2", "JAM2", "PDE1A", "DGKI", "KCNMB1", "LEFTY2", "PLAT", "PAK1", "TGFB2", "KCNMA1", "TGFB3", "WEE1", "COL1A2", "APOA1", "DDR1", "ATP1B2", "FYN", "VEGFC", "MAFK", "PIK3R1", "GATA5", "MCAM", "DOCK1", "SCARB1", "KCNMB4", "PTPN11", "PDE6A", "CD47", "FZD7", "KCNMB2", "JAM3", "APOD", "RASGRP1", "IGF1", "COL3A1", "KIF3C", "CABLES1", "PDE3B", "GUCY1A3", "ADAMTS13", "GATA6…
273	TRANSCRIPTION, DNA-DEPENDENT%GO%GO:0006351	8.21627e-07	8.92956e-06	0.659444	0.270877	2.14083	242	c("ESR1", "POLR1E", "RUNX2", "TCF4", "LEF1", "NPPA", "IVNS1ABP", "CREB5", "PLAGL1", "HLF", "TCEA2", "RORA", "NR2F1", "ZNF444", "LMO2", "RARB", "NR2C1", "TRIM33", "TRIM29", "GATA6", "KLF5", "DDIT3", "NR3C1", "POLR3B", "GABPA", "ZSCAN1", "CDKN2B", "MED30", "TCFL5", "ZSCAN18", "BAZ2B", "BMPR2", "SUPT3H", "THRA", "BAZ1B", "UBTF", "ZNF287", "ZNF641", "NR0B2", "AR", "GTF2F2", "ETV1", "DVL2", "MEF2C", "…
274	TRANSMISSION OF NERVE IMPULSE%GO%GO:0019226	8.31804e-07	9.00716e-06	0.659444	0.290624	2.23489	201	c("KCNA5", "GRIA3", "SNCA", "MBP", "SCN2B", "KCNN3", "SLC6A1", "APOE", "AGRN", "AP3M2", "CRHBP", "GRM1", "BDNF", "KCNMB1", "DRD4", "AMPH", "KCNMA1", "GNB3", "CHRNA3", "GLRB", "GABRB1", "KCNS3", "ABCC8", "BRSK1", "KCNAB1", "RAPSN", "KCNA4", "KCNC4", "KCNK6", "CXCR4", "CAMK2B", "KCNMB4", "SLC5A7", "KCNIP1", "VAMP1", "DLG4", "ALDH5A1", "SHANK1", "FRMPD4", "KCNMB2", "GRIA1", "CACNA1B", "EPHB3", "ATXN…
275	NEURONAL SYSTEM%REACTOME%REACT_13685.3	8.76457e-07	9.45617e-06	0.659444	0.338993	2.36493	110	c("KCNA5", "GRIA3", "KCNN3", "SLC1A7", "SLC6A1", "KCNMB1", "KCNMA1", "GNB3", "CHRNA3", "CACNA2D2", "GABRB1", "KCNS3", "ABCC8", "KCNA4", "KCNC4", "KCNK6", "CAMK2B", "KCNMB4", "SLC5A7", "GNG11", "VAMP1", "DLG4", "ALDH5A1", "KCNMB2", "GRIA1", "CACNA1B", "SLC6A12", "EPB41L1", "CAMK2G", "GNAI1", "ARHGEF9", "GNG2", "PLCB1", "ADCY2", "GRIK4", "KCNK17", "ACTN2", "RRAS", "ABAT", "STX16", "KCNS1", "CAMK2A"…
276	NEGATIVE REGULATION OF CELL CYCLE%GO%GO:0045786	8.80308e-07	9.46331e-06	0.659444	0.380614	2.48751	80	c("BMP4", "TGFB2", "PLAGL1", "PKD2", "APBB2", "PTPN3", "MYOCD", "MAPK12", "TP53INP1", "IRF6", "PPP1R15A", "DBC1", "HPGD", "ING4", "INHBA", "TPR", "TCF7L2", "CDKN2B", "PKD1", "KIF20B", "MFN2", "ATM", "BUB1", "PRKAA2", "TSC1", "FHL1", "PPP2R3B", "HBP1", "ANAPC10", "MAD2L1", "UBE2D1", "CDKN1B", "MYO16", "PRKAB2", "APC", "CDKN2C", "TERF1", "HDAC3", "JMY", "GAS6", "NBN", "MAGI2", "KHDRBS1", "STK11", "…
277	CYTOPLASMIC VESICLE%GO%GO:0031410	9.16451e-07	9.81628e-06	0.659444	0.287437	2.21752	206	c("GRIA3", "SERPINE2", "SNCA", "MME", "PROS1", "SYTL2", "DPYSL3", "SGIP1", "CPE", "CRHBP", "LEFTY2", "AMPH", "TGFB2", "SH3GL2", "TGFB3", "RASSF9", "DPP4", "RAB23", "BRSK1", "APOA1", "PCSK5", "CA4", "COPZ2", "VEGFC", "TYRP1", "MYO5B", "SCG5", "SSPN", "CXCR4", "CAMK2B", "RAB26", "VAMP1", "DLG4", "CXXC4", "VPS41", "SYTL1", "MYRIP", "GRIA1", "SORT1", "ANP32E", "HLA-DRB5", "AMOT", "IGF1", "BICD1", "HL…
278	ORGANIC SUBSTANCE TRANSPORT%GO%GO:0071702	9.32648e-07	9.95233e-06	0.659444	0.245764	2.02075	342	c("CA3", "SNCA", "ABCG2", "EDNRA", "JAK2", "SLC1A7", "APOE", "DRD4", "CRYM", "TGFB2", "IFIT1", "RASSF9", "SLC16A4", "SLC27A6", "LTBP4", "ACE", "SCG2", "ATP6V1G2", "APOA1", "PCSK5", "CA4", "COPZ2", "KIF13A", "RPS4Y1", "SCG5", "PACS1", "SCARB1", "S100A13", "PRICKLE1", "RAB26", "CLIP3", "SLC16A7", "PPP1R10", "SLC44A1", "SPTBN1", "CA5B", "APOM", "RTP4", "SLC4A8", "SLC16A5", "APOD", "BTN3A1", "INHBA",…
279	NEGATIVE REGULATION OF CELL DEATH%GO%GO:0060548	9.3733e-07	9.95233e-06	0.659444	0.303376	2.25649	165	c("COMP", "HTR2B", "SNCA", "SOX4", "SOCS2", "SFRP1", "BMP4", "APOE", "LEF1", "NTRK2", "TGFB3", "SCG2", "BCL2", "SOX8", "NES", "CAPN3", "ANXA4", "MAP2K5", "PLK2", "SOX9", "CXCR7", "SORT1", "IGF1", "RAMP2", "PLK3", "SMO", "GATA6", "AMIGO2", "SIAH2", "TCF7L2", "NRBP2", "MSH2", "KANK2", "STIL", "SFRP2", "PRKAA2", "CCL5", "FIGNL1", "PRKD1", "FGF2", "ERCC5", "CLU", "TP73", "AR", "FGFR2", "TBX3", "MEF2C…
280	POSITIVE REGULATION OF PROGRAMMED CELL DEATH%GO%GO:0043068	9.39216e-07	9.95233e-06	0.659444	0.322478	2.30429	127	c("SFRP4", "FRZB", "SOX4", "SFRP1", "JAK2", "BMP4", "HRK", "APOE", "IGFBP3", "LEF1", "TGFB2", "KCNMA1", "IFIT2", "TGFB3", "PRMT2", "TPD52L1", "TNFSF10", "MLLT11", "PLAGL1", "NET1", "ANKRD1", "CLIP3", "NUPR1", "CRADD", "ING4", "GZMA", "INHBA", "TNFRSF25", "NME3", "BCL2L11", "DUSP6", "ATM", "SFRP2", "CCL5", "NLRP1", "CLU", "DAPK3", "BNIPL", "MEF2C", "CDK5", "KLF11", "FAM162A", "CDKN1B", "SIRT1", "T…
281	MULTI-MULTICELLULAR ORGANISM PROCESS%GO%GO:0044706	9.68727e-07	1.02285e-05	0.643552	0.618552	2.70595	21	c("SFRP4", "COL16A1", "CRHBP", "PTGFR", "NPPA", "TRO", "BCL2", "PCSK5", "HPGD", "RLN2", "PTHLH", "PLA2G4C", "CLIC5")
282	INTRACELLULAR TRANSPORT%GO%GO:0046907	1.0011e-06	1.05328e-05	0.643552	0.249012	2.03551	324	c("HTR2B", "KIF1A", "JAK2", "APOE", "AP3M2", "TGFB2", "IFIT1", "SH3GL2", "RASSF9", "BCL2", "COPZ2", "PKD2", "KIF13A", "RPS4Y1", "SCG5", "PACS1", "PRICKLE1", "FYCO1", "RAB26", "PPP1R10", "SPTBN1", "MYO10", "RAB11FIP3", "DOPEY1", "RTP4", "VPS41", "SORT1", "BICD1", "COL4A3BP", "CPT2", "DENND2A", "ANK1", "COG7", "TPR", "CPT1B", "LMTK2", "CSPG5", "PEX7", "CHMP5", "CEP57", "ANP32A", "SPIRE1", "BBS1", "…
283	GROWTH%GO%GO:0040007	1.01572e-06	1.06489e-05	0.643552	0.443951	2.54074	48	c("BMP4", "EVC", "TGFB2", "FOXS1", "PRMT2", "FGF1", "FOXC2", "NUPR1", "SOX9", "ST6GAL2", "FOXD2", "APOD", "IGF1", "ENOX2", "SMO", "STIL", "AR", "FGFR2", "CAV3", "CDK5", "FGFR3", "DDR2", "COBL", "ERBB2IP", "MESP1", "APP", "NLGN3", "NACA", "MAGI2", "ARIH2")
284	ORGANIC HYDROXY COMPOUND METABOLIC PROCESS%GO%GO:1901615	1.03416e-06	1.0804e-05	0.643552	0.391545	2.54074	77	c("DIO2", "SNCA", "ENPP2", "SNCAIP", "APOE", "SLC44A5", "TM7SF2", "DRD4", "TGFB2", "ACADL", "APOA1", "ALDH1A1", "CYP11A1", "SLC44A1", "IGF1", "MBOAT2", "CYP46A1", "PLA2G4C", "ACSS1", "FGF2", "LCAT", "NR0B2", "SMPD3", "GK2", "SLC27A1", "ALDH3A2", "LDLRAP1", "NUDT3", "DPM1", "ACADM", "OSBPL1A", "GPLD1", "SCP2", "CHKB", "HAND2", "SLC44A2", "SAMD8", "IDI2", "COQ3", "TG", "NPC1L1", "CNBP", "ENPP6", "F…
285	OLFACTORY SIGNALING PATHWAY%REACTOME%REACT_15488.3	1.04457e-06	1.08746e-05	0.643552	-0.410778	-3.20917	35	c("OR8D2", "OR2D2", "OR51I1", "OR2T29", "OR4X2", "OR5AP2", "OR7A17", "OR6A2", "GNAL", "OR2A2", "OR7G2", "OR6C76", "OR10H3", "OR6N2", "OR2B2", "OR1D2", "OR2L3", "OR2AG1", "OR6C4", "OR2H1", "OR14I1", "OR2A5", "OR10G7")
286	PROTEIN DIMERIZATION ACTIVITY%GO%GO:0046983	1.08666e-06	1.12731e-05	0.643552	0.269523	2.12582	238	c("FAP", "KIT", "ABCG2", "APOE", "TCF4", "CRYM", "TGFB2", "NTRK2", "PRMT2", "DPP4", "TPD52L1", "S100A6", "BCL2", "MASP1", "APOBEC3G", "PKD2", "EXT1", "TYRP1", "S100A13", "RAB11FIP3", "EPHX2", "ALDH5A1", "HPGD", "GZMA", "ATPIF1", "TP53I3", "CD247", "GSTA4", "PRTFDC1", "KLHL7", "BMP6", "TPR", "PEX7", "HEXB", "GHR", "ALS2", "CEP57", "FBXO4", "NDP", "GABPA", "DCK", "ARNT2", "CADM1", "MSH2", "ATM", "P…
287	DENDRITE%GO%GO:0030425	1.12342e-06	1.15821e-05	0.643552	0.40976	2.50452	62	c("MME", "FARP1", "APOE", "CRHBP", "PAK1", "CHRNA3", "SIPA1L1", "DLG4", "PLK2", "SHANK1", "FRMPD4", "FGF13", "GRIA1", "APOD", "NCDN", "P2RY1", "SARM1", "ALS2", "ADCY2", "ACTN2", "NLGN4X", "FZD3", "CDK5", "BSN", "NLGN1", "COBL", "MAGEE1", "SYNPO", "APP", "EPHA5", "GIPC1", "MAGI2", "LRRK2", "SRGAP2", "CTNNB1", "PDLIM5", "OPA1", "NF1", "ZFYVE27", "ACHE", "RGS14", "CACNG8", "DNM3", "CDK5R1", "TP63", …
288	NEGATIVE REGULATION OF PROGRAMMED CELL DEATH%GO%GO:0043069	1.12425e-06	1.15821e-05	0.643552	0.299728	2.22476	161	c("COMP", "HTR2B", "SNCA", "SOX4", "SOCS2", "SFRP1", "BMP4", "APOE", "LEF1", "NTRK2", "TGFB3", "SCG2", "BCL2", "SOX8", "NES", "CAPN3", "ANXA4", "MAP2K5", "PLK2", "SOX9", "CXCR7", "SORT1", "IGF1", "RAMP2", "PLK3", "SMO", "GATA6", "AMIGO2", "SIAH2", "TCF7L2", "NRBP2", "MSH2", "KANK2", "STIL", "SFRP2", "PRKAA2", "CCL5", "FIGNL1", "ERCC5", "CLU", "TP73", "AR", "FGFR2", "TBX3", "MEF2C", "MAD2L1", "PPA…
289	REGULATION OF PROTEIN TRANSPORT%GO%GO:0051223	1.14842e-06	1.17902e-05	0.643552	0.356054	2.41823	96	c("HTR2B", "TMEM30B", "SOX4", "TNFRSF4", "BMP4", "MDFIC", "DRD4", "TGFB2", "XPO4", "TGFB3", "RAB23", "APOA1", "RSAD2", "KANK1", "PKD2", "DACT3", "ANKRD1", "IL33", "FZD7", "SCAMP5", "APOD", "BAMBI", "IGF1", "HLA-DRB1", "BMP6", "PTPN14", "TPR", "TCF7L2", "CADM1", "DACT1", "DYRK2", "PKD1", "PTGER4", "NLRP1", "WWP2", "MYO1C", "ASPH", "RBPMS", "SIRT1", "BMPR1A", "MDFI", "P2RX7", "F2R", "PSMD10", "GAS6…
290	ENDOMEMBRANE SYSTEM%GO%GO:0012505	1.17222e-06	1.1993e-05	0.643552	0.238551	1.97469	367	c("ST8SIA2", "GRIA3", "SNCA", "PROS1", "SGIP1", "PDGFD", "TM7SF2", "GSTM5", "ORMDL3", "PAK1", "CHST6", "ATP1B4", "SH3GL2", "RASSF9", "CCND2", "FMO3", "ELOVL4", "CYP2J2", "CHSY3", "S100A6", "BCL2", "ST8SIA4", "NMNAT2", "RSAD2", "B3GNT2", "CA4", "SCRN1", "COPZ2", "PKD2", "EXT1", "TYRP1", "MYO5B", "KDELR3", "CAMK2B", "RYR3", "PRICKLE1", "RAB26", "LTC4S", "VAMP1", "DLG4", "DOPEY1", "AGPAT4", "MGAT3",…
291	NUCLEOBASE-CONTAINING COMPOUND BIOSYNTHETIC PROCESS%GO%GO:0034654	1.18933e-06	1.21263e-05	0.643552	0.247354	2.02185	323	c("HTR2B", "ESR1", "POLR1E", "RUNX2", "TCF4", "LEF1", "NPPA", "IVNS1ABP", "CREB5", "NMNAT2", "PLAGL1", "RPS4Y1", "HLF", "TCEA2", "NPPB", "RORA", "NR2F1", "ZNF444", "LMO2", "RARB", "AK5", "GFPT1", "RAMP2", "PRTFDC1", "NR2C1", "TRIM33", "TRIM29", "GATA6", "KLF5", "DDIT3", "NR3C1", "POLR3B", "GABPA", "DCK", "ZSCAN1", "CDKN2B", "TK2", "MED30", "TCFL5", "ZSCAN18", "BAZ2B", "BMPR2", "SUPT3H", "THRA", "…
292	SECRETION BY CELL%GO%GO:0032940	1.22604e-06	1.24578e-05	0.643552	0.344743	2.36468	101	c("KIT", "PROS1", "SYTL2", "SLC6A1", "CRHBP", "LEFTY2", "TGFB2", "TGFB3", "LTBP4", "SCG2", "BRSK1", "APOA1", "PCSK5", "SCRN1", "VEGFC", "S100A13", "CADPS", "RAB26", "SLC5A7", "VAMP1", "ALDH5A1", "SYTL1", "BTN3A1", "INHBA", "IGF1", "EDN3", "ANK1", "SLC6A12", "CAMK2G", "CCL5", "ACTN2", "CLU", "TBX3", "ABAT", "CDK5", "SLC17A7", "CD36", "NECAB3", "NLGN1", "APP", "LTBP2", "VCL", "CD9", "SLC6A13", "STX…
293	PHOSPHOLIPID METABOLIC PROCESS%GO%GO:0006644	1.29167e-06	1.30798e-05	0.643552	0.341803	2.39078	112	c("HTR2B", "PLCE1", "ENPP2", "SLC44A5", "ARSJ", "APOA1", "INPP4B", "PIK3R1", "SLC44A1", "ALDH5A1", "AGPAT4", "PIK3C2B", "ASAH1", "ARSD", "COL4A3BP", "MBOAT2", "HEXB", "PLA2G4C", "AGPAT9", "PIP4K2B", "ATM", "PLCB1", "MTMR4", "ARSG", "PRKD1", "FGF2", "THEM5", "LCAT", "HEXA", "PGAP1", "PIGK", "SMPD3", "MPPE1", "PIGM", "SLC27A1", "PIGZ", "ARSI", "PIGP", "STS", "DPM3", "LPL", "DPM1", "PIK3R2", "SYNJ2"…
294	PROTEIN COMPLEX BINDING%GO%GO:0032403	1.3251e-06	1.33727e-05	0.643552	0.373161	2.45235	82	c("THBS4", "COL16A1", "ECM2", "THY1", "EDIL3", "LTBP4", "ADAM22", "NES", "PIK3R1", "PTPN11", "JAM3", "GRB10", "IGF1", "COL3A1", "ADAMTS13", "TPR", "VCAM1", "ULK1", "THBS3", "GNAI1", "MSH2", "ATM", "VTN", "SMYD2", "SFRP2", "PEX1", "SYNM", "PMS1", "ACTN2", "DST", "CAV3", "SORBS1", "PEX6", "LDLRAP1", "LCA5", "ERBB2IP", "PHIP", "SMAD7", "PCNA", "PKP2", "ADAM2", "IGF1R", "IGF2", "ERCC6")
295	POSITIVE REGULATION OF PROTEIN MODIFICATION PROCESS%GO%GO:0031401	1.34335e-06	1.35109e-05	0.643552	0.269075	2.11654	234	c("THBS4", "HTR2B", "PLCE1", "KIT", "SNCA", "SOX4", "CCND1", "JAK2", "BMP4", "MDFIC", "DRD4", "PAK1", "TGFB2", "CHRNA3", "TGFB3", "CCND2", "TPD52L1", "PKD2", "KDELR3", "CXCR4", "PRICKLE1", "CLIP3", "PELI2", "MAP2K5", "SOX9", "TNIK", "FGF13", "GFPT1", "INHBA", "BTRC", "IGF1", "EDN3", "FAM129A", "BMP6", "KIDINS220", "PILRB", "P2RY1", "DDIT3", "NRP1", "GHR", "ALS2", "DNMT3B", "FBXO4", "THBS3", "NTF3…
296	KERATAN SULFATE KERATIN METABOLISM%REACTOME%REACT_121288.2	1.36911e-06	1.36773e-05	0.643552	0.679186	2.63526	15	c("FMOD", "OGN", "LUM", "OMD", "CHST6", "PRELP", "B3GNT2", "ST3GAL3", "HEXB", "ST3GAL6", "HEXA")
297	KERATAN SULFATE METABOLIC PROCESS%GO%GO:0042339	1.36911e-06	1.36773e-05	0.643552	0.679186	2.63526	15	c("FMOD", "OGN", "LUM", "OMD", "CHST6", "PRELP", "B3GNT2", "ST3GAL3", "HEXB", "ST3GAL6", "HEXA")
298	ENZYME BINDING%GO%GO:0019899	1.58292e-06	1.57601e-05	0.643552	0.242802	2.00418	359	c("DIO2", "FAP", "KCNA5", "PLCE1", "SYTL2", "CCND1", "PIK3IP1", "JAK2", "ESR1", "SNCAIP", "STK38L", "PTPRR", "PPP1R16B", "GNB3", "HDAC9", "CCND2", "DPP4", "APOA1", "BCL2", "DIXDC1", "RABGAP1L", "PKD2", "DACT3", "PIK3R1", "MID1", "MYO5B", "PTPN3", "ANKRD1", "CXCR4", "DACT2", "RAB11FIP3", "SOX9", "CRADD", "TNIP1", "TNNI3", "ATPIF1", "MDM4", "SORT1", "ATXN3", "BICD1", "CRY2", "PDE3B", "ANK1", "SLC22…
299	Melanogenesis%KEGG%hsa04916	1.67775e-06	1.66485e-05	0.643552	0.476533	2.6039	41	c("FZD2", "KIT", "LEF1", "TYRP1", "CAMK2B", "FZD1", "WNT2B", "FZD7", "WNT9A", "TCF7L2", "CAMK2G", "GNAI1", "CREB3L4", "FZD6", "PLCB1", "ADCY2", "PLCB4", "FZD3", "DVL2", "ASIP", "CAMK2A", "DVL3", "EP300", "KITLG", "CAMK2D")
300	NEGATIVE REGULATION OF APOPTOTIC PROCESS%GO%GO:0043066	1.72845e-06	1.70944e-05	0.643552	0.300964	2.2268	157	c("COMP", "HTR2B", "SNCA", "SOX4", "SOCS2", "SFRP1", "BMP4", "APOE", "LEF1", "NTRK2", "TGFB3", "SCG2", "BCL2", "SOX8", "NES", "CAPN3", "ANXA4", "MAP2K5", "PLK2", "SOX9", "CXCR7", "SORT1", "IGF1", "RAMP2", "PLK3", "SMO", "GATA6", "SIAH2", "TCF7L2", "NRBP2", "MSH2", "STIL", "SFRP2", "PRKAA2", "CCL5", "FIGNL1", "ERCC5", "CLU", "TP73", "AR", "FGFR2", "TBX3", "MEF2C", "MAD2L1", "PPARGC1A", "SIRT1", "I…
301	CELLULAR CHEMICAL HOMEOSTASIS%GO%GO:0055082	1.8475e-06	1.8211e-05	0.643552	0.294818	2.19296	163	c("KCNA5", "HTR2B", "PLCE1", "SOX4", "MBP", "ABCG2", "EDNRA", "SCN2B", "DRD4", "KCNE1", "HEPH", "KCNMA1", "CHRNA3", "CYBRD1", "SCN3B", "SCN4B", "ATP6V1G2", "CYSLTR1", "CDH23", "BCL2", "SLC40A1", "PKD2", "SLC30A1", "CXCR4", "KCNMB4", "PDE6A", "DLG4", "EPHX2", "PDK3", "SHANK1", "KCNMB2", "TNNI3", "CACNA1B", "P2RY1", "ATP7B", "CSRP3", "CCL5", "PDE6B", "FGF2", "WWP2", "KIF5B", "RGN", "ACTN2", "NLGN4X…
302	NEGATIVE REGULATION OF CELLULAR COMPONENT ORGANIZATION%GO%GO:0051129	1.86432e-06	1.83161e-05	0.643552	0.332072	2.32822	113	c("FAP", "SNCA", "PLEKHH2", "THY1", "SFRP1", "BMP4", "DPYSL3", "DPP4", "APOA1", "KANK1", "CLIP3", "LIMA1", "FGF13", "GSN", "SCAMP5", "APOD", "IGF1", "TPR", "OMA1", "DNMT3B", "PTGER4", "THRA", "ATM", "BUB1", "SFRP2", "PRKD1", "RTN4R", "CLU", "AR", "CAV3", "PACSIN3", "ANAPC10", "SETMAR", "MAD2L1", "CDK5RAP2", "CLASP1", "UBE2D1", "BRCA1", "CBFA2T2", "ARHGEF2", "TMEM67", "PHF1", "APOC1", "ITM2C", "AP…
303	RNA BIOSYNTHETIC PROCESS%GO%GO:0032774	1.87451e-06	1.83553e-05	0.643552	0.255492	2.03991	259	c("ESR1", "POLR1E", "RUNX2", "TCF4", "LEF1", "NPPA", "IVNS1ABP", "CREB5", "PLAGL1", "RPS4Y1", "HLF", "TCEA2", "RORA", "NR2F1", "ZNF444", "LMO2", "RARB", "NR2C1", "TRIM33", "TRIM29", "GATA6", "KLF5", "DDIT3", "NR3C1", "POLR3B", "GABPA", "ZSCAN1", "CDKN2B", "MED30", "TCFL5", "ZSCAN18", "BAZ2B", "BMPR2", "SUPT3H", "THRA", "BAZ1B", "UBTF", "ZNF287", "ZNF641", "NR0B2", "AR", "GTF2F2", "ETV1", "DVL2", …
304	BRAIN DEVELOPMENT%GO%GO:0007420	2.06151e-06	2.012e-05	0.627257	0.360137	2.41186	90	c("SFRP4", "FRZB", "FZD2", "SFRP1", "BMP4", "LEF1", "CNTN4", "NTRK2", "DIXDC1", "NES", "PTPN11", "WDR62", "FZD1", "HESX1", "WNT2B", "FGF13", "FZD7", "APOD", "EPHB3", "PCDH18", "MDGA1", "SMO", "TCF7L2", "ROBO1", "BBS4", "CEP290", "STIL", "FZD6", "PLCB1", "SFRP2", "SHROOM2", "NLGN4X", "FGFR2", "FZD3", "DVL2", "CDK5RAP2", "MYO16", "PROX1", "HES5", "NFIB", "EPHA7", "BBS2", "EPHA5", "SIX3", "PLXNB2", …
305	POSITIVE REGULATION OF APOPTOTIC PROCESS%GO%GO:0043065	2.09342e-06	2.03593e-05	0.627257	0.320375	2.29123	126	c("SFRP4", "FRZB", "SOX4", "SFRP1", "JAK2", "BMP4", "HRK", "APOE", "IGFBP3", "LEF1", "TGFB2", "KCNMA1", "IFIT2", "TGFB3", "PRMT2", "TPD52L1", "TNFSF10", "MLLT11", "PLAGL1", "NET1", "ANKRD1", "CLIP3", "NUPR1", "CRADD", "ING4", "GZMA", "INHBA", "TNFRSF25", "NME3", "BCL2L11", "DUSP6", "ATM", "SFRP2", "CCL5", "NLRP1", "CLU", "DAPK3", "BNIPL", "MEF2C", "CDK5", "KLF11", "FAM162A", "CDKN1B", "SIRT1", "T…
306	POSITIVE REGULATION OF MULTICELLULAR ORGANISMAL PROCESS%GO%GO:0051240	2.09975e-06	2.03593e-05	0.627257	0.320168	2.27777	123	c("HTR2B", "SULF1", "JAK2", "BMP4", "SGIP1", "TGFB2", "FOXS1", "TGFB3", "SCN3B", "RSAD2", "SOX8", "SULF2", "IL33", "NPPB", "MYOCD", "DLG4", "EPHX2", "PLK2", "LGI1", "WNT2B", "SOX9", "FOXD2", "INHBA", "IGF1", "EDN3", "BMP6", "SMO", "DDIT3", "GHR", "POLR3B", "OMA1", "BMPR2", "PLCB1", "FGF2", "NLRP1", "NLGN4X", "FGFR2", "MEF2C", "PTGER3", "PPARGC1A", "BMPR1A", "AFAP1L2", "NLGN1", "P2RX7", "MESP1", "…
307	POSITIVE REGULATION OF CELL DEATH%GO%GO:0010942	2.19943e-06	2.12564e-05	0.627257	0.317669	2.27937	131	c("SFRP4", "FRZB", "SOX4", "SFRP1", "JAK2", "BMP4", "HRK", "APOE", "IGFBP3", "LEF1", "TGFB2", "KCNMA1", "IFIT2", "TGFB3", "PRMT2", "TPD52L1", "TNFSF10", "MLLT11", "PLAGL1", "NET1", "ANKRD1", "CLIP3", "NUPR1", "CRADD", "ING4", "GZMA", "INHBA", "TNFRSF25", "NME3", "BCL2L11", "DUSP6", "ATM", "SFRP2", "CCL5", "NLRP1", "CLU", "DAPK3", "BNIPL", "MEF2C", "CDK5", "KLF11", "HBA2", "FAM162A", "CDKN1B", "SI…
308	CARBOHYDRATE DERIVATIVE METABOLIC PROCESS%GO%GO:1901135	2.21844e-06	2.13705e-05	0.627257	0.241991	1.97759	322	c("FMOD", "ST8SIA2", "HTR2B", "PDE5A", "OGN", "SULF1", "LUM", "OMD", "AGRN", "ST8SIA5", "ARSJ", "NPPA", "KCNE1", "CHST6", "GNB3", "TSPAN8", "RAB23", "CHSY3", "PRELP", "GPC6", "ST8SIA4", "APOBEC3G", "B3GNT2", "EXT1", "HAS3", "RENBP", "SULF2", "APOBEC3F", "NPPB", "PDE6A", "ST6GALNAC1", "GNG11", "ALDH5A1", "MGAT3", "ASAH1", "AK5", "TNIP1", "GFPT1", "IGF1", "RAMP2", "PRTFDC1", "ARSD", "PDE3B", "COG7"…
309	GTPASE REGULATOR ACTIVITY%GO%GO:0030695	2.24991e-06	2.15618e-05	0.627257	0.341246	2.37415	108	c("HTR2B", "PLCE1", "THY1", "FARP1", "RGS4", "RGS11", "RGS5", "IQGAP2", "RABGAP1L", "NET1", "TIAM2", "DOCK1", "ALDH1A1", "ARHGAP1", "KIAA1244", "RGL1", "RGS17", "RASGRP1", "RGS6", "DENND2A", "RALBP1", "PSD3", "FBXO8", "RABGAP1", "ALS2", "ARHGEF4", "HERC1", "RAPGEF6", "LLGL1", "KALRN", "PLCB1", "FGD5", "RCBTB2", "RIN2", "RALGPS1", "RASAL2", "SOS2", "SYNGAP1", "ARHGEF6", "MON2", "ARHGEF2", "FNIP1",…
310	IMMUNE SYSTEM PROCESS%GO%GO:0002376	2.25284e-06	2.15618e-05	0.627257	0.219413	1.84383	430	c("KIT", "SNCA", "PROS1", "CFH", "SOX4", "CTSK", "MBP", "THY1", "TNFRSF4", "SFRP1", "JAK2", "BMP4", "JAM2", "LEF1", "ENAH", "PAK1", "TGFB2", "IFIT2", "HERC5", "HDAC9", "IFIT1", "SH3GL2", "DPP4", "ACE", "SCG2", "COLEC12", "ZEB1", "COL1A2", "RNASEL", "BCL2", "MASP1", "APOBEC3G", "RSAD2", "ATP1B2", "FYN", "CRIP1", "SNRK", "PIK3R1", "CXCR4", "CAMK2B", "S100A13", "APOBEC3F", "XAF1", "PTPN11", "CD47", …
311	NUCLEOSIDE-TRIPHOSPHATASE REGULATOR ACTIVITY%GO%GO:0060589	2.38702e-06	2.27726e-05	0.627257	0.335322	2.34276	111	c("HTR2B", "PLCE1", "THY1", "FARP1", "RGS4", "RGS11", "RGS5", "IQGAP2", "RABGAP1L", "NET1", "TIAM2", "DOCK1", "ALDH1A1", "ARHGAP1", "KIAA1244", "RGL1", "RGS17", "ATPIF1", "RASGRP1", "RGS6", "DENND2A", "RALBP1", "PSD3", "FBXO8", "RABGAP1", "ALS2", "ARHGEF4", "HERC1", "RAPGEF6", "LLGL1", "KALRN", "PLCB1", "FGD5", "RCBTB2", "RIN2", "RALGPS1", "RASAL2", "SOS2", "SYNGAP1", "ARHGEF6", "MON2", "ARHGEF2"…
312	CHORDATE EMBRYONIC DEVELOPMENT%GO%GO:0043009	2.45153e-06	2.32387e-05	0.627257	0.405213	2.5142	65	c("SOX4", "SULF1", "ALDH1A2", "LEF1", "PTPRR", "FOXS1", "TGFB3", "PCSK5", "SOX8", "PKD2", "FOXC2", "SULF2", "PRICKLE1", "WNT9A", "IRX5", "SMO", "ARNT2", "BBS4", "PKD1", "STIL", "FZD6", "FUT8", "FGFR2", "FZD3", "DVL2", "KIAA1217", "E2F8", "COBL", "PPP2R3A", "PROX1", "HES5", "TFEB", "ZP3", "PLXNB2", "ESRRB", "HAND2", "COL2A1", "POU5F1", "CTNNB1", "COL1A1", "VEGFA", "GATA3", "TWIST1")
313	EMBRYO DEVELOPMENT ENDING IN BIRTH OR EGG HATCHING%GO%GO:0009792	2.45153e-06	2.32387e-05	0.627257	0.405213	2.5142	65	c("SOX4", "SULF1", "ALDH1A2", "LEF1", "PTPRR", "FOXS1", "TGFB3", "PCSK5", "SOX8", "PKD2", "FOXC2", "SULF2", "PRICKLE1", "WNT9A", "IRX5", "SMO", "ARNT2", "BBS4", "PKD1", "STIL", "FZD6", "FUT8", "FGFR2", "FZD3", "DVL2", "KIAA1217", "E2F8", "COBL", "PPP2R3A", "PROX1", "HES5", "TFEB", "ZP3", "PLXNB2", "ESRRB", "HAND2", "COL2A1", "POU5F1", "CTNNB1", "COL1A1", "VEGFA", "GATA3", "TWIST1")
314	MUSCLE CONTRACTION%REACTOME%REACT_17044.3	2.49397e-06	2.35656e-05	0.627257	0.599803	2.62393	21	c("TNNT1", "TNNT3", "MYL1", "MYH11", "TPM3", "TNNI3", "CALD1", "LMOD1", "NEB", "ACTN2", "SORBS1", "TNNI1", "TNNC2", "VCL", "MYL6B", "MYL9", "DMD")
315	AMINOGLYCAN METABOLIC PROCESS%GO%GO:0006022	2.50818e-06	2.36247e-05	0.627257	0.404862	2.46293	60	c("FMOD", "OGN", "LUM", "OMD", "AGRN", "CHST6", "CHSY3", "PRELP", "GPC6", "B3GNT2", "EXT1", "HAS3", "ST3GAL3", "SDC2", "GAL3ST3", "CSPG5", "HEXB", "IDS", "CHST14", "GLCE", "FGF2", "B3GNT8", "HS2ST1", "ST3GAL6", "HEXA", "FUCA1", "GPC1", "IDUA", "HSPG2")
316	PATTERN SPECIFICATION PROCESS%GO%GO:0007389	2.52997e-06	2.37545e-05	0.627257	0.369929	2.41493	79	c("SFRP1", "BMP4", "LEF1", "FOXS1", "TTC8", "PCSK5", "PKD2", "MID1", "FOXC2", "PKD1L1", "LRP5", "WNT2B", "CXXC4", "DAND5", "WNT9A", "FOXD2", "FOXI2", "CYP26B1", "SMO", "DDIT3", "LRRC6", "BBS4", "BMPR2", "DUSP6", "STIL", "SFRP2", "NPHP3", "FGFR2", "TBX3", "DVL2", "MEF2C", "MDFI", "COBL", "PPP2R3A", "MESP1", "FOXP1", "HHEX", "BCOR", "SMAD5", "HAND2", "NBL1", "GATA4", "FOXP2", "FOXO4", "CTNNB1")
317	REGULATION OF ANGIOGENESIS%GO%GO:0045765	2.7171e-06	2.5431e-05	0.627257	0.421723	2.48824	54	c("THBS4", "SULF1", "SFRP1", "THBS2", "HDAC9", "FGF1", "FOXC2", "SERPINF1", "NPPB", "MAP2K5", "GPR124", "AMOT", "RAMP2", "PDE3B", "GATA6", "THBS3", "PTPRM", "SFRP2", "PRKD1", "FGF2", "HDAC5", "RRAS", "TSPAN12", "TNFSF12", "ROCK1", "SP100", "HHEX", "KRIT1", "PRKCA", "GATA4", "FOXO4", "CTNNB1", "AGGF1", "VEGFA", "NF1", "TWIST1", "VEGFB")
318	REGULATION OF CELL CYCLE PROCESS%GO%GO:0010564	2.97941e-06	2.7637e-05	0.627257	0.330453	2.32061	114	c("SOX4", "SFRP1", "BMP4", "LEF1", "PRMT2", "SOX15", "PKD2", "APBB2", "PLK2", "LRP5", "NUSAP1", "SOX9", "CRADD", "IGF1", "EDN3", "PPP1R1C", "TPR", "GATA6", "STAG2", "DACT1", "MSH2", "PKD1", "KANK2", "KIF20B", "ATM", "PLCB1", "BUB1", "FHL1", "DAPK3", "ID2", "ANAPC10", "SETMAR", "CDK5", "UBB", "MAD2L1", "CDK5RAP2", "E2F8", "UBE2D1", "BRCA1", "CDKN1B", "MYO16", "KIF23", "TMEM67", "PHIP", "DYNC1LI1",…
319	TRANSCRIPTION FACTOR BINDING TRANSCRIPTION FACTOR ACTIVITY%GO%GO:0000989	2.98107e-06	2.7637e-05	0.627257	0.283877	2.1683	189	c("SOX4", "PRRX1", "TCF4", "CRYM", "HDAC9", "PRMT2", "DYRK1B", "ZEB1", "ANKRD1", "MYOCD", "NR2F1", "HSF4", "LMO2", "ING4", "SP4", "MKL2", "PSMC3IP", "PTPN14", "KLF12", "SMARCA2", "PSIP1", "DDIT3", "RNF20", "SIAH2", "DNMT3B", "GABPA", "SUB1", "ZSCAN1", "MED30", "ID4", "TBL1XR1", "SUPT3H", "ELK3", "SMARCC2", "NAB2", "FGF2", "ZHX1", "NR0B2", "JAZF1", "TAF1", "DDX17", "ZNF85", "SS18", "E2F8", "NFE2L1…
320	CELL MOTILITY%GO%GO:0048870	2.99004e-06	2.7637e-05	0.627257	0.294915	2.19356	165	c("THBS4", "FAP", "HTR2B", "KIT", "PROS1", "EPHA3", "JAM2", "LEF1", "TGFB2", "FSCN1", "NTRK2", "DPP4", "SCG2", "COL1A2", "GPC6", "DDR1", "ATP1B2", "FYN", "ASTN1", "SOX8", "FMNL3", "VEGFC", "PIK3R1", "FERMT1", "CXCR4", "PTPN11", "CD47", "PODXL2", "DNAH1", "FGF13", "FOXD2", "GPR124", "JAM3", "EPHB3", "BAMBI", "HMGB2", "EDN3", "TRPM4", "MDGA1", "SMO", "S100A2", "VCAM1", "NRP1", "THBS3", "ROBO1", "LR…
321	LOCALIZATION OF CELL%GO%GO:0051674	2.99004e-06	2.7637e-05	0.627257	0.294915	2.19356	165	c("THBS4", "FAP", "HTR2B", "KIT", "PROS1", "EPHA3", "JAM2", "LEF1", "TGFB2", "FSCN1", "NTRK2", "DPP4", "SCG2", "COL1A2", "GPC6", "DDR1", "ATP1B2", "FYN", "ASTN1", "SOX8", "FMNL3", "VEGFC", "PIK3R1", "FERMT1", "CXCR4", "PTPN11", "CD47", "PODXL2", "DNAH1", "FGF13", "FOXD2", "GPR124", "JAM3", "EPHB3", "BAMBI", "HMGB2", "EDN3", "TRPM4", "MDGA1", "SMO", "S100A2", "VCAM1", "NRP1", "THBS3", "ROBO1", "LR…
322	POSITIVE REGULATION OF ION TRANSPORT%GO%GO:0043270	3.03329e-06	2.79496e-05	0.627257	0.524789	2.61002	30	c("SNCA", "THY1", "DRD4", "KCNE1", "SCN3B", "SCN4B", "CAPN3", "CNKSR3", "PLA2R1", "CCL5", "KIF5B", "FHL1", "ACTN2", "ASPH", "CACNA1D", "P2RX7", "F2R", "ZP3", "PKP2", "TRPC1", "STIM2")
323	PHOSPHOTRANSFERASE ACTIVITY, ALCOHOL GROUP AS ACCEPTOR%GO%GO:0016773	3.08137e-06	2.83047e-05	0.627257	0.272906	2.11181	209	c("KIT", "EPHA3", "JAK2", "STK38L", "PAK1", "TGFB2", "NTRK2", "LTBP4", "WEE1", "DYRK1B", "ICK", "BRSK1", "CRIM1", "DDR1", "FYN", "SNRK", "NT5C2", "MAPK12", "MAP2K5", "PLK2", "SOX9", "PDK3", "TNIK", "TSSK6", "PIK3C2B", "EPHB3", "COL4A3BP", "PLK3", "LMTK2", "ULK1", "EIF2AK2", "NRP1", "MAP4K4", "NRBP2", "CLK4", "DYRK2", "BMPR2", "SRPK3", "AKAP13", "PIP4K2B", "ATM", "NUAK1", "BUB1", "PRKAA2", "CCL5",…
324	REGULATION OF BLOOD PRESSURE%GO%GO:0008217	3.15246e-06	2.88684e-05	0.627257	0.512983	2.61391	32	c("NPR3", "ACE2", "NPPA", "GNB3", "DDAH1", "ACE", "COL1A2", "PCSK5", "RENBP", "NPPB", "EPHX2", "LRP5", "TNNI3", "RAMP2", "EDN3", "ACSM3", "BMPR2", "ID2")
325	TRANSFERASE ACTIVITY, TRANSFERRING PHOSPHORUS-CONTAINING GROUPS%GO%GO:0016772	3.21587e-06	2.93584e-05	0.627257	0.255328	2.04098	263	c("KIT", "EPHA3", "JAK2", "STK38L", "PAK1", "TGFB2", "NTRK2", "LTBP4", "WEE1", "DYRK1B", "ICK", "BRSK1", "CRIM1", "NMNAT2", "DDR1", "FYN", "SNRK", "NT5C2", "MAPK12", "MAP2K5", "PLK2", "SOX9", "PDK3", "TNIK", "TSSK6", "PIK3C2B", "AK5", "EPHB3", "COL4A3BP", "PLK3", "LMTK2", "ULK1", "EIF2AK2", "NRP1", "MAP4K4", "DCK", "NRBP2", "CLK4", "DYRK2", "BMPR2", "SRPK3", "AKAP13", "PIP4K2B", "ATM", "NUAK1", "…
326	Tight junction%KEGG%hsa04530	3.22769e-06	2.9376e-05	0.627257	0.420246	2.49411	56	c("PPP2R2B", "JAM2", "MYH11", "MYL7", "MYH10", "RRAS2", "MYL5", "JAM3", "MYH7B", "TJP1", "TJAP1", "SPTAN1", "EPB41L1", "GNAI1", "CLDN9", "PPP2R1B", "LLGL1", "MRAS", "CLDN11", "IGSF5", "MPDZ", "ACTN2", "CTNNA3", "RRAS", "MAGI1", "SYMPK", "TJP2", "CLDN1", "CSNK2A2", "MYL9", "MAGI2", "INADL", "PRKCA", "AKT1", "CTNNB1")
327	CELLULAR HOMEOSTASIS%GO%GO:0019725	3.36352e-06	3.05186e-05	0.627257	0.285025	2.14853	176	c("KCNA5", "HTR2B", "PLCE1", "SOX4", "MBP", "ABCG2", "EDNRA", "SCN2B", "DRD4", "KCNE1", "HEPH", "KCNMA1", "CHRNA3", "CYBRD1", "SCN3B", "SCN4B", "ATP6V1G2", "CYSLTR1", "CDH23", "BCL2", "SLC40A1", "PKD2", "CAPN3", "SLC30A1", "CXCR4", "KCNMB4", "PDE6A", "DLG4", "EPHX2", "PDK3", "SHANK1", "KCNMB2", "TNNI3", "CACNA1B", "P2RY1", "DDIT3", "ATP7B", "CSRP3", "CCL5", "PDE6B", "FGF2", "WWP2", "KIF5B", "RGN"…
328	TRANSCRIPTION COFACTOR ACTIVITY%GO%GO:0003712	3.39462e-06	3.07068e-05	0.627257	0.282366	2.14357	182	c("SOX4", "PRRX1", "CRYM", "HDAC9", "PRMT2", "DYRK1B", "ZEB1", "ANKRD1", "NR2F1", "HSF4", "ING4", "SP4", "MKL2", "PSMC3IP", "PTPN14", "KLF12", "SMARCA2", "PSIP1", "DDIT3", "RNF20", "SIAH2", "DNMT3B", "GABPA", "SUB1", "ZSCAN1", "MED30", "ID4", "TBL1XR1", "SUPT3H", "ELK3", "SMARCC2", "NAB2", "FGF2", "ZHX1", "NR0B2", "JAZF1", "TAF1", "DDX17", "ZNF85", "SS18", "E2F8", "NFE2L1", "PIAS2", "BRCA1", "PPA…
329	CELL DEATH%GO%GO:0008219	3.97491e-06	3.5738e-05	0.610527	0.263578	2.08163	241	c("SNCA", "EPHA3", "SFRP1", "JAK2", "IER3", "LEF1", "TGFB2", "IFIT2", "GADD45A", "TPD52L1", "BCL2", "TNFSF10", "MLLT11", "PNMA2", "CRIP1", "UNC5B", "NET1", "TIAM2", "CAPN3", "ARHGEF3", "CXCR4", "PDIA2", "MCF2", "MAP2K5", "TP53INP1", "DBC1", "CRADD", "SOX7", "ING4", "GSN", "SEMA6A", "KIAA0141", "GZMA", "TP53I3", "MDM4", "SORT1", "TNFRSF25", "HMGB2", "PLK3", "ARHGEF12", "TJP1", "SPTAN1", "DDIT3", "…
330	DEATH%GO%GO:0016265	3.97491e-06	3.5738e-05	0.610527	0.263578	2.08163	241	c("SNCA", "EPHA3", "SFRP1", "JAK2", "IER3", "LEF1", "TGFB2", "IFIT2", "GADD45A", "TPD52L1", "BCL2", "TNFSF10", "MLLT11", "PNMA2", "CRIP1", "UNC5B", "NET1", "TIAM2", "CAPN3", "ARHGEF3", "CXCR4", "PDIA2", "MCF2", "MAP2K5", "TP53INP1", "DBC1", "CRADD", "SOX7", "ING4", "GSN", "SEMA6A", "KIAA0141", "GZMA", "TP53I3", "MDM4", "SORT1", "TNFRSF25", "HMGB2", "PLK3", "ARHGEF12", "TJP1", "SPTAN1", "DDIT3", "…
331	FATTY ACID, TRIACYLGLYCEROL, AND KETONE BODY METABOLISM%REACTOME%REACT_22279.2	4.08929e-06	3.65431e-05	0.610527	0.36657	2.39573	80	c("ACADL", "ELOVL4", "APOA1", "TIAM2", "ANKRD1", "RGL1", "RORA", "AGPAT4", "CPT2", "CPT1B", "MED30", "AGPAT9", "TBL1XR1", "ABCB4", "OXCT1", "PRKAA2", "SLC27A1", "HMGCL", "PPARGC1A", "CD36", "PRKAB2", "EP300", "MED12", "NCOA2", "NFYC", "ACADM", "SLC25A20", "PPARGC1B", "PCCB", "SIN3A", "HDAC3", "CLOCK", "CHD9", "GPAM", "AGPAT1", "MCEE", "AGPAT2", "MED6", "CDK8", "MED11", "FDFT1", "ABCA1", "MED13", …
332	CELLULAR MEMBRANE ORGANIZATION%GO%GO:0016044	4.1014e-06	3.65431e-05	0.610527	0.335174	2.3319	108	c("CPE", "AGRN", "NRXN2", "SH3GL2", "SCN3B", "BCL2", "PACS1", "CAPN3", "DOCK1", "LRMP", "CXCR4", "PTPRD", "SPTBN1", "DLG4", "FGF13", "BAIAP2L2", "RAMP2", "ANK1", "SMO", "P2RY1", "CHMP5", "FCHO2", "GJB2", "SEC31A", "MFN2", "SNAP23", "STAM", "KLHL12", "NLGN4X", "CAV3", "UBB", "PACSIN1", "TRIM72", "NLGN1", "SH3D19", "VPS37D", "NLGN3", "CD9", "ARRB1", "CHCHD6", "EHD3", "GAS6", "ADAM2", "MAGI2", "EEA1…
333	MEMBRANE ORGANIZATION%GO%GO:0061024	4.1014e-06	3.65431e-05	0.610527	0.335174	2.3319	108	c("CPE", "AGRN", "NRXN2", "SH3GL2", "SCN3B", "BCL2", "PACS1", "CAPN3", "DOCK1", "LRMP", "CXCR4", "PTPRD", "SPTBN1", "DLG4", "FGF13", "BAIAP2L2", "RAMP2", "ANK1", "SMO", "P2RY1", "CHMP5", "FCHO2", "GJB2", "SEC31A", "MFN2", "SNAP23", "STAM", "KLHL12", "NLGN4X", "CAV3", "UBB", "PACSIN1", "TRIM72", "NLGN1", "SH3D19", "VPS37D", "NLGN3", "CD9", "ARRB1", "CHCHD6", "EHD3", "GAS6", "ADAM2", "MAGI2", "EEA1…
334	GLYCOLIPID METABOLIC PROCESS%GO%GO:0006664	4.1474e-06	3.68423e-05	0.610527	0.46129	2.55216	43	c("ST8SIA2", "ST8SIA5", "ARSJ", "ST8SIA4", "ALDH5A1", "ASAH1", "ARSD", "HEXB", "ARSG", "ST3GAL6", "HEXA", "PGAP1", "PIGK", "SMPD3", "MPPE1", "PIGM", "ST6GALNAC4", "PIGZ", "ARSI", "PIGP", "STS", "DPM3", "ST6GALNAC6", "DPM1", "NEU3", "SUMF1", "GPLD1", "PIGV")
335	REGULATION OF CELL MORPHOGENESIS INVOLVED IN DIFFERENTIATION%GO%GO:0010769	4.33382e-06	3.83834e-05	0.610527	0.388624	2.43225	67	c("EPHA3", "THY1", "SFRP1", "APOE", "LEF1", "TGFB2", "CHN1", "CHRNA3", "NTRK2", "TGFB3", "DIXDC1", "KANK1", "SIPA1L1", "CAMK2B", "PTPRD", "LRRC4C", "TNIK", "FGF13", "EPHB3", "BAMBI", "SDC2", "SARM1", "TCF7L2", "ROBO1", "SFRP2", "ISLR2", "RTN4R", "CDK5", "MAPT", "LINGO1", "RAP2A", "SMAD7", "LRRK2", "TWF2", "CTNNB1", "PDLIM5", "CAPRIN1", "COL1A1", "TWIST1", "NGEF", "ACHE", "BCL11A", "ELL3", "CAPRIN…
336	REGULATION OF SKELETAL MUSCLE FIBER DEVELOPMENT%GO%GO:0048742	4.40352e-06	3.88846e-05	0.610527	0.600976	2.53206	19	c("BMP4", "BOC", "AGRN", "IGFBP3", "HDAC9", "SOX8", "SOX9", "PLCB1", "HDAC5", "HDAC4", "TBX3", "MEF2C", "HDAC3", "NACA", "HIF1AN", "RBM24")
337	Focal adhesion%KEGG%hsa04510	4.55434e-06	4.00971e-05	0.610527	0.33977	2.30098	95	c("THBS4", "COMP", "CCND1", "PDGFD", "THBS2", "PAK1", "CCND2", "COL1A2", "MYL7", "BCL2", "FYN", "VEGFC", "ITGA8", "PIK3R1", "LAMA2", "DOCK1", "LAMA4", "ITGA10", "MYL5", "LAMC3", "IGF1", "COL3A1", "THBS3", "COL4A5", "VTN", "ITGA9", "PDGFC", "ACTN2", "SHC4", "CAV3", "SOS2", "MAPK10", "PIK3R2", "VCL", "ROCK1", "MYL9", "ILK", "IGF1R", "RAP1A", "PIK3CG", "PPP1CB", "LAMA3", "COL2A1", "ITGB7", "PRKCA", …
338	LAMELLIPODIUM%GO%GO:0030027	4.59005e-06	4.02919e-05	0.610527	0.500281	2.58099	34	c("FAP", "ANTXR1", "PLEKHH2", "DPYSL3", "DPP4", "PKD2", "APBB2", "EVL", "PTPN13", "AMOT", "ALS2", "PTPRM", "FGD5", "TSC1", "ARHGEF6", "APC", "SYNE2", "FGD6", "PDXP", "ABI2", "SRGAP2", "PKN2", "TWF2", "CTNNB1", "SCYL3")
339	REGULATION OF ORGANELLE ORGANIZATION%GO%GO:0033043	4.68021e-06	4.09622e-05	0.610527	0.283352	2.14628	181	c("SNCA", "PLEKHH2", "EPHA3", "SFRP1", "BMP4", "HRK", "PAK1", "TNFSF10", "MLLT11", "NES", "KANK1", "PIF1", "CLIP3", "MYOCD", "LIMA1", "PLK2", "LRP5", "NUSAP1", "FGF13", "GSN", "AMOT", "IGF1", "EDN3", "RICTOR", "TPR", "OMA1", "DNMT3B", "NTF3", "NEXN", "BCL2L11", "KIF20B", "NEB", "PTGER4", "ATM", "BUB1", "PRKD1", "TSC1", "TLK1", "DAPK3", "CAV3", "ANAPC10", "SETMAR", "CDK5", "ALMS1", "MAD2L1", "CDK5…
340	MALE SEX DIFFERENTIATION%GO%GO:0046661	4.72355e-06	4.12199e-05	0.610527	0.569268	2.53415	22	c("KIT", "SOX15", "SOX8", "WNT2B", "SOX9", "INHBA", "MAMLD1", "GATA6", "AMHR2", "LRRC6", "MSH2", "LHCGR", "TBX3", "FGF9", "KITLG", "CSDE1", "GATA4", "CTNNB1")
341	CARBOHYDRATE DERIVATIVE BIOSYNTHETIC PROCESS%GO%GO:1901137	5.03698e-06	4.29265e-05	0.610527	0.279058	2.08953	171	c("FMOD", "ST8SIA2", "HTR2B", "OGN", "LUM", "OMD", "AGRN", "ST8SIA5", "NPPA", "KCNE1", "CHST6", "TSPAN8", "CHSY3", "PRELP", "GPC6", "ST8SIA4", "B3GNT2", "EXT1", "HAS3", "NPPB", "ST6GALNAC1", "MGAT3", "AK5", "TNIP1", "GFPT1", "IGF1", "RAMP2", "PRTFDC1", "COG7", "ST3GAL3", "SDC2", "GAL3ST3", "CSPG5", "DCK", "CHST14", "TK2", "SEC31A", "GLCE", "GALNT11", "TRAK1", "ADCY2", "DUT", "B3GNT8", "FUT8", "CE…
342	GLYCOSAMINOGLYCAN METABOLISM%REACTOME%REACT_121315.2	5.12166e-06	4.29265e-05	0.610527	0.419143	2.43633	51	c("FMOD", "OGN", "LUM", "OMD", "AGRN", "CHST6", "CHSY3", "PRELP", "GPC6", "B3GNT2", "EXT1", "HAS3", "ST3GAL3", "SDC2", "CSPG5", "HEXB", "IDS", "CHST14", "GLCE", "HS2ST1", "ST3GAL6", "HEXA", "GPC1", "IDUA", "HSPG2")
343	MPS I - HURLER SYNDROME%REACTOME%REACT_147857.2	5.12166e-06	4.29265e-05	0.610527	0.419143	2.43633	51	c("FMOD", "OGN", "LUM", "OMD", "AGRN", "CHST6", "CHSY3", "PRELP", "GPC6", "B3GNT2", "EXT1", "HAS3", "ST3GAL3", "SDC2", "CSPG5", "HEXB", "IDS", "CHST14", "GLCE", "HS2ST1", "ST3GAL6", "HEXA", "GPC1", "IDUA", "HSPG2")
344	MPS II - HUNTER SYNDROME%REACTOME%REACT_147734.2	5.12166e-06	4.29265e-05	0.610527	0.419143	2.43633	51	c("FMOD", "OGN", "LUM", "OMD", "AGRN", "CHST6", "CHSY3", "PRELP", "GPC6", "B3GNT2", "EXT1", "HAS3", "ST3GAL3", "SDC2", "CSPG5", "HEXB", "IDS", "CHST14", "GLCE", "HS2ST1", "ST3GAL6", "HEXA", "GPC1", "IDUA", "HSPG2")
345	MPS IIIA - SANFILIPPO SYNDROME A%REACTOME%REACT_147753.2	5.12166e-06	4.29265e-05	0.610527	0.419143	2.43633	51	c("FMOD", "OGN", "LUM", "OMD", "AGRN", "CHST6", "CHSY3", "PRELP", "GPC6", "B3GNT2", "EXT1", "HAS3", "ST3GAL3", "SDC2", "CSPG5", "HEXB", "IDS", "CHST14", "GLCE", "HS2ST1", "ST3GAL6", "HEXA", "GPC1", "IDUA", "HSPG2")
346	MPS IIIB - SANFILIPPO SYNDROME B%REACTOME%REACT_147788.2	5.12166e-06	4.29265e-05	0.610527	0.419143	2.43633	51	c("FMOD", "OGN", "LUM", "OMD", "AGRN", "CHST6", "CHSY3", "PRELP", "GPC6", "B3GNT2", "EXT1", "HAS3", "ST3GAL3", "SDC2", "CSPG5", "HEXB", "IDS", "CHST14", "GLCE", "HS2ST1", "ST3GAL6", "HEXA", "GPC1", "IDUA", "HSPG2")
347	MPS IIIC - SANFILIPPO SYNDROME C%REACTOME%REACT_147860.2	5.12166e-06	4.29265e-05	0.610527	0.419143	2.43633	51	c("FMOD", "OGN", "LUM", "OMD", "AGRN", "CHST6", "CHSY3", "PRELP", "GPC6", "B3GNT2", "EXT1", "HAS3", "ST3GAL3", "SDC2", "CSPG5", "HEXB", "IDS", "CHST14", "GLCE", "HS2ST1", "ST3GAL6", "HEXA", "GPC1", "IDUA", "HSPG2")
348	MPS IIID - SANFILIPPO SYNDROME D%REACTOME%REACT_147749.2	5.12166e-06	4.29265e-05	0.610527	0.419143	2.43633	51	c("FMOD", "OGN", "LUM", "OMD", "AGRN", "CHST6", "CHSY3", "PRELP", "GPC6", "B3GNT2", "EXT1", "HAS3", "ST3GAL3", "SDC2", "CSPG5", "HEXB", "IDS", "CHST14", "GLCE", "HS2ST1", "ST3GAL6", "HEXA", "GPC1", "IDUA", "HSPG2")
349	MPS IV - MORQUIO SYNDROME A%REACTOME%REACT_147825.2	5.12166e-06	4.29265e-05	0.610527	0.419143	2.43633	51	c("FMOD", "OGN", "LUM", "OMD", "AGRN", "CHST6", "CHSY3", "PRELP", "GPC6", "B3GNT2", "EXT1", "HAS3", "ST3GAL3", "SDC2", "CSPG5", "HEXB", "IDS", "CHST14", "GLCE", "HS2ST1", "ST3GAL6", "HEXA", "GPC1", "IDUA", "HSPG2")
350	MPS IV - MORQUIO SYNDROME B%REACTOME%REACT_147798.2	5.12166e-06	4.29265e-05	0.610527	0.419143	2.43633	51	c("FMOD", "OGN", "LUM", "OMD", "AGRN", "CHST6", "CHSY3", "PRELP", "GPC6", "B3GNT2", "EXT1", "HAS3", "ST3GAL3", "SDC2", "CSPG5", "HEXB", "IDS", "CHST14", "GLCE", "HS2ST1", "ST3GAL6", "HEXA", "GPC1", "IDUA", "HSPG2")
351	MPS IX - NATOWICZ SYNDROME%REACTOME%REACT_147739.2	5.12166e-06	4.29265e-05	0.610527	0.419143	2.43633	51	c("FMOD", "OGN", "LUM", "OMD", "AGRN", "CHST6", "CHSY3", "PRELP", "GPC6", "B3GNT2", "EXT1", "HAS3", "ST3GAL3", "SDC2", "CSPG5", "HEXB", "IDS", "CHST14", "GLCE", "HS2ST1", "ST3GAL6", "HEXA", "GPC1", "IDUA", "HSPG2")
352	MPS VI - MAROTEAUX-LAMY SYNDROME%REACTOME%REACT_147719.2	5.12166e-06	4.29265e-05	0.610527	0.419143	2.43633	51	c("FMOD", "OGN", "LUM", "OMD", "AGRN", "CHST6", "CHSY3", "PRELP", "GPC6", "B3GNT2", "EXT1", "HAS3", "ST3GAL3", "SDC2", "CSPG5", "HEXB", "IDS", "CHST14", "GLCE", "HS2ST1", "ST3GAL6", "HEXA", "GPC1", "IDUA", "HSPG2")
353	MPS VII - SLY SYNDROME%REACTOME%REACT_147759.2	5.12166e-06	4.29265e-05	0.610527	0.419143	2.43633	51	c("FMOD", "OGN", "LUM", "OMD", "AGRN", "CHST6", "CHSY3", "PRELP", "GPC6", "B3GNT2", "EXT1", "HAS3", "ST3GAL3", "SDC2", "CSPG5", "HEXB", "IDS", "CHST14", "GLCE", "HS2ST1", "ST3GAL6", "HEXA", "GPC1", "IDUA", "HSPG2")
354	MUCOPOLYSACCHARIDOSES%REACTOME%REACT_147853.2	5.12166e-06	4.29265e-05	0.610527	0.419143	2.43633	51	c("FMOD", "OGN", "LUM", "OMD", "AGRN", "CHST6", "CHSY3", "PRELP", "GPC6", "B3GNT2", "EXT1", "HAS3", "ST3GAL3", "SDC2", "CSPG5", "HEXB", "IDS", "CHST14", "GLCE", "HS2ST1", "ST3GAL6", "HEXA", "GPC1", "IDUA", "HSPG2")
355	GLYCEROLIPID METABOLIC PROCESS%GO%GO:0046486	5.35289e-06	4.46595e-05	0.610527	0.352308	2.37369	93	c("HTR2B", "PLCE1", "ENPP2", "APOE", "SLC44A5", "ELOVL4", "APOA1", "INPP4B", "PIK3R1", "SLC44A1", "ALDH5A1", "AGPAT4", "PIK3C2B", "MBOAT2", "PLA2G4C", "AGPAT9", "PIP4K2B", "ATM", "PLCB1", "MTMR4", "FGF2", "THEM5", "LCAT", "PGAP1", "PIGK", "CAV3", "MPPE1", "PIGM", "SLC27A1", "PIGZ", "SIRT1", "PIGP", "DPM3", "LPL", "DPM1", "PIK3R2", "SYNJ2", "CDS2", "GPLD1", "MTMR14", "PIK3C3", "FABP4", "CHKB", "PI…
356	PROTEIN KINASE ACTIVITY%GO%GO:0004672	5.36818e-06	4.46595e-05	0.610527	0.273405	2.09327	190	c("KIT", "EPHA3", "JAK2", "STK38L", "PAK1", "TGFB2", "NTRK2", "LTBP4", "WEE1", "DYRK1B", "ICK", "BRSK1", "CRIM1", "DDR1", "FYN", "SNRK", "MAPK12", "MAP2K5", "PLK2", "SOX9", "PDK3", "TNIK", "TSSK6", "EPHB3", "COL4A3BP", "PLK3", "LMTK2", "ULK1", "EIF2AK2", "NRP1", "MAP4K4", "NRBP2", "CLK4", "DYRK2", "BMPR2", "SRPK3", "AKAP13", "ATM", "NUAK1", "BUB1", "PRKAA2", "CCL5", "PRKD1", "BAZ1B", "ZAP70", "TL…
357	CATION TRANSPORT%GO%GO:0006812	5.37895e-06	4.46595e-05	0.610527	0.291242	2.15386	155	c("KCNA5", "HTR2B", "SNCA", "SCN2B", "KCNT2", "KCNMB1", "KCNE1", "KCNMA1", "ATP1B4", "KCNS3", "ABCC8", "SCN3B", "SCN4B", "ATP6V1G2", "CDH23", "KCNAB1", "FYN", "KCNA4", "SLC40A1", "PKD2", "KCNC4", "UCP2", "KCNK6", "SLC30A1", "RYR3", "KCNMB4", "CACNA2D1", "SLC44A1", "KCNMB2", "RAMP2", "CPT2", "ATP5S", "SLC22A18", "CPT1B", "LMTK2", "ATP7B", "NNT", "PRKAA2", "CCL5", "SLC24A1", "FGF2", "KCNK17", "KCNS…
358	PHOSPHATIDYLINOSITOL BINDING%GO%GO:0035091	5.38864e-06	4.46595e-05	0.610527	0.442571	2.5158	47	c("THY1", "SYTL2", "PLEKHA4", "PIK3R1", "SCARB1", "MYO10", "GAB2", "FRMPD4", "COL4A3BP", "FCHO2", "SH3YL1", "PLCB1", "SNX16", "SNX1", "PIGK", "MPPE1", "WIPI1", "LDLRAP1", "ITPR1", "SNX13", "PLEKHA5", "EEA1", "MARK1", "SESTD1", "TWF2", "ZFYVE1", "AKT1", "ZFYVE26", "LANCL2", "WDFY1", "TIRAP", "MTM1", "PHF12", "WDR45")
359	REGULATION OF ION TRANSPORT%GO%GO:0043269	5.42935e-06	4.48715e-05	0.610527	0.35854	2.35817	83	c("SFRP4", "KCNA5", "SNCA", "THY1", "SCN2B", "CRHBP", "DRD4", "KCNE1", "CHRNA3", "SCN3B", "SCN4B", "BCL2", "PKD2", "CAPN3", "SLC30A1", "CAMK2B", "CACNA2D1", "DLG4", "SHANK1", "CNKSR3", "CRY2", "PLA2R1", "CAMK2G", "CCL5", "WWP2", "KIF5B", "FHL1", "ACTN2", "CAV3", "ASPH", "CACNA1D", "NLGN1", "P2RX7", "F2R", "NEDD4L", "CAMK2D", "NLGN3", "ZP3", "PKP2", "TRPC1", "DMD", "STIM2", "HOMER1", "AKT1", "RYR2…
360	CELLULAR MACROMOLECULE BIOSYNTHETIC PROCESS%GO%GO:0034645	5.56484e-06	4.58635e-05	0.610527	0.209388	1.78301	489	c("DIO2", "ST8SIA2", "ESR1", "POLR1E", "RUNX2", "TCF4", "LEF1", "NPPA", "KCNE1", "IVNS1ABP", "CREB5", "TSPAN8", "CHSY3", "ST8SIA4", "B3GNT2", "PLAGL1", "EXT1", "RPS4Y1", "HLF", "TCEA2", "MCM2", "CLIP3", "ST6GALNAC1", "RORA", "NR2F1", "ZNF444", "LMO2", "ING4", "MGAT3", "RARB", "TNIP1", "GFPT1", "INHBA", "IGF1", "NR2C1", "TRIM33", "TRIM29", "COG7", "ST3GAL3", "GAL3ST3", "GINS2", "GATA6", "KLF5", "C…
361	EMBRYONIC ORGAN DEVELOPMENT%GO%GO:0048568	5.67608e-06	4.66508e-05	0.610527	0.407647	2.46176	58	c("FRZB", "KIT", "LEF1", "TGFB2", "FOXS1", "PCSK5", "NES", "PKD2", "FOXC2", "LRP5", "SOX9", "WNT9A", "RARB", "FOXI2", "IRX5", "SMO", "PKD1", "CEP290", "STIL", "FZD6", "ID2", "FGFR2", "FZD3", "DVL2", "DVL3", "E2F8", "MLL", "COBL", "KITLG", "PROX1", "TFEB")
362	CHROMOSOME%GO%GO:0005694	5.78377e-06	4.74046e-05	0.610527	0.27877	2.11813	183	c("CENPA", "NDC80", "RUNX2", "HIST1H2AC", "MYCN", "CCND2", "ZSCAN4", "CBX7", "PIF1", "MCM2", "PPP1R10", "HMGB2", "HIST1H2BC", "NCAPD3", "MPHOSPH8", "HIST1H2BG", "SMARCA2", "PSIP1", "TPR", "RNF20", "DYNLL1", "GABPA", "TCF7L2", "STAG2", "MSH2", "PURA", "NCAPD2", "ATM", "PLCB1", "BUB1", "H1FX", "BAZ1B", "DCTN1", "HIST1H2AE", "HIST1H4H", "TP73", "AR", "MAD2L1", "CLASP1", "BRCA1", "SIRT1", "DSN1", "HI…
363	REGULATION OF GROWTH%GO%GO:0040008	6.23055e-06	5.09258e-05	0.610527	0.312916	2.24842	133	c("FRZB", "PLCE1", "SOCS2", "SFRP1", "BMP4", "SGIP1", "APOE", "AGRN", "LEF1", "TGFB2", "FOXS1", "LTBP4", "BCL2", "SOX15", "DACT3", "NET1", "APBB2", "CAPN3", "FOXC2", "NPPB", "N6AMT1", "LGI1", "FGF13", "ING4", "INHBA", "IGF1", "PPP1R1C", "SMARCA2", "GHR", "OMA1", "BMPR2", "DUSP6", "PLCB1", "SFRP2", "FGF2", "FHL1", "FGFR1OP", "ISLR2", "NLGN4X", "FGFR2", "BNIPL", "MEF2C", "FGFR3", "CISH", "CDKN1B", …
364	PROGRAMMED CELL DEATH%GO%GO:0012501	6.25611e-06	5.09942e-05	0.610527	0.256747	2.01719	231	c("SNCA", "EPHA3", "SFRP1", "JAK2", "IER3", "LEF1", "IFIT2", "GADD45A", "TPD52L1", "BCL2", "TNFSF10", "MLLT11", "PNMA2", "CRIP1", "UNC5B", "NET1", "TIAM2", "CAPN3", "ARHGEF3", "CXCR4", "PDIA2", "MCF2", "MAP2K5", "TP53INP1", "CRADD", "SOX7", "ING4", "GSN", "SEMA6A", "KIAA0141", "GZMA", "TP53I3", "MDM4", "SORT1", "TNFRSF25", "HMGB2", "PLK3", "ARHGEF12", "TJP1", "SPTAN1", "DDIT3", "DYNLL1", "SIAH2",…
365	CELL PROJECTION ASSEMBLY%GO%GO:0030031	6.46878e-06	5.25832e-05	0.610527	0.420259	2.40514	48	c("KIT", "CC2D2A", "TTC8", "INTU", "TTC26", "DZIP1", "BBS10", "ARHGEF4", "BBS1", "LRRC6", "BBS4", "SPAG16", "TMEM107", "CEP290", "FGD5", "ACTN2", "TTLL3", "ARHGEF6", "TMEM67", "STK36", "P2RX7", "MKS1", "VCL", "BBS2", "FGD6", "DMD", "IFT172", "SRGAP2", "WDR35", "NEK1")
366	PDZ DOMAIN BINDING%GO%GO:0030165	6.55767e-06	5.31601e-05	0.610527	0.563655	2.55063	23	c("SFRP4", "FRZB", "FZD2", "SFRP1", "FZD1", "CXXC4", "FZD7", "GRIA1", "SDC2", "SMO", "CADM1", "FZD6", "SFRP2", "FZD3", "PARK2", "SRR")
367	CELL MIGRATION%GO%GO:0016477	6.63489e-06	5.36396e-05	0.610527	0.297133	2.19145	153	c("THBS4", "FAP", "HTR2B", "KIT", "PROS1", "EPHA3", "JAM2", "LEF1", "TGFB2", "FSCN1", "NTRK2", "DPP4", "SCG2", "COL1A2", "GPC6", "DDR1", "ATP1B2", "FYN", "ASTN1", "SOX8", "FMNL3", "VEGFC", "PIK3R1", "FERMT1", "CXCR4", "PTPN11", "CD47", "PODXL2", "FGF13", "FOXD2", "GPR124", "JAM3", "EPHB3", "BAMBI", "HMGB2", "EDN3", "TRPM4", "MDGA1", "SMO", "S100A2", "VCAM1", "NRP1", "THBS3", "ROBO1", "EFNB2", "CC…
368	ION TRANSMEMBRANE TRANSPORTER ACTIVITY%GO%GO:0015075	6.84331e-06	5.51742e-05	0.610527	0.283248	2.13103	175	c("KCNA5", "GRIA3", "HTR2B", "SLC26A4", "SCN2B", "SLC1A7", "KCNT2", "KCNE1", "KCNMA1", "ATP1B4", "CHRNA3", "SLC16A4", "GLRB", "KCNS3", "ABCC8", "SCN3B", "SCN4B", "ATP1B2", "KCNA4", "SLC40A1", "PKD2", "KCNC4", "KCNK6", "RYR3", "PKD1L1", "KCNMB4", "SLC5A7", "CACNA2D1", "SLC16A7", "SLC44A1", "TPCN1", "SLC16A5", "KCNMB2", "GRIA1", "ATP5S", "SLC2A10", "TRPM4", "ATP7B", "PKD1", "NNT", "SLC13A4", "SLC24…
369	PROTEIN HOMODIMERIZATION ACTIVITY%GO%GO:0042803	7.16978e-06	5.76497e-05	0.610527	0.274049	2.10109	194	c("FAP", "KIT", "ABCG2", "APOE", "CRYM", "TGFB2", "NTRK2", "PRMT2", "DPP4", "TPD52L1", "S100A6", "BCL2", "MASP1", "APOBEC3G", "PKD2", "EXT1", "TYRP1", "S100A13", "RAB11FIP3", "EPHX2", "ALDH5A1", "HPGD", "GZMA", "ATPIF1", "TP53I3", "CD247", "GSTA4", "PRTFDC1", "KLHL7", "TPR", "PEX7", "HEXB", "GHR", "ALS2", "CEP57", "FBXO4", "NDP", "DCK", "CADM1", "MSH2", "PLCB1", "OXCT1", "CCL5", "ERCC5", "CECR1",…
370	HEPARIN BINDING%GO%GO:0008201	7.27766e-06	5.8359e-05	0.610527	0.548353	2.58964	26	c("THBS4", "COMP", "POSTN", "SERPINE2", "CFH", "MDK", "SFRP1", "APOE", "HBEGF", "FGF1", "COL13A1", "PCOLCE2")
371	ION HOMEOSTASIS%GO%GO:0050801	7.47064e-06	5.9745e-05	0.610527	0.275171	2.06043	171	c("SFRP4", "KCNA5", "HTR2B", "PLCE1", "SNCA", "SLC26A4", "MBP", "ABCG2", "EDNRA", "SCN2B", "DRD4", "KCNE1", "HFE2", "HEPH", "KCNMA1", "CHRNA3", "CYBRD1", "SCN3B", "SCN4B", "ATP6V1G2", "CYSLTR1", "CDH23", "BCL2", "SLC40A1", "PKD2", "SLC30A1", "CXCR4", "KCNMB4", "PDE6A", "DLG4", "EPHX2", "SHANK1", "KCNMB2", "TNNI3", "CACNA1B", "P2RY1", "ATP7B", "BDH2", "CSRP3", "PRKAA2", "CCL5", "PDE6B", "FGF2", "W…
372	POSITIVE REGULATION OF CELL DIFFERENTIATION%GO%GO:0045597	7.62559e-06	6.08202e-05	0.610527	0.304462	2.17556	127	c("SFRP4", "FRZB", "PROM1", "SERPINE2", "SFRP1", "BMP4", "BOC", "IGFBP3", "TCF4", "LEF1", "TGFB2", "NTRK2", "TGFB3", "ZEB1", "DIXDC1", "SOX8", "CXCR4", "PTPRD", "SERPINF1", "MYOCD", "MAPK12", "LRP5", "SOX9", "INHBA", "BAMBI", "HMGB2", "IGF1", "BMP6", "SOX6", "SMO", "VWC2", "TCF7L2", "ROBO1", "BMPR2", "PLCB1", "SFRP2", "EFNB2", "PRKD1", "FGF2", "ZAP70", "ISLR2", "MEF2C", "GPC1", "MAPT", "BMPR1A", …
373	BLOOD CIRCULATION%GO%GO:0008015	7.80621e-06	6.19279e-05	0.593325	0.369182	2.38423	75	c("HTR2B", "NPR3", "EDNRA", "SCN2B", "MEOX2", "ACE2", "NPPA", "KCNE1", "GNB3", "FOXS1", "DDAH1", "ACE", "SCN3B", "SCN4B", "COL1A2", "PCSK5", "RENBP", "FOXC2", "NPPB", "EPHX2", "LRP5", "TNNI3", "AMOT", "RAMP2", "EDN3", "GUCY1A3", "ACSM3", "BMPR2", "CSRP3", "ID2", "RCAN1", "TBC1D8", "F2R", "ERAP1", "GAS6", "DMD", "ADM", "FGFBP3", "RYR2", "CLNS1A", "SLC8A1", "NPR2", "VEGFA", "OLR1", "VEGFB", "GCLC",…
374	CIRCULATORY SYSTEM PROCESS%GO%GO:0003013	7.80621e-06	6.19279e-05	0.593325	0.369182	2.38423	75	c("HTR2B", "NPR3", "EDNRA", "SCN2B", "MEOX2", "ACE2", "NPPA", "KCNE1", "GNB3", "FOXS1", "DDAH1", "ACE", "SCN3B", "SCN4B", "COL1A2", "PCSK5", "RENBP", "FOXC2", "NPPB", "EPHX2", "LRP5", "TNNI3", "AMOT", "RAMP2", "EDN3", "GUCY1A3", "ACSM3", "BMPR2", "CSRP3", "ID2", "RCAN1", "TBC1D8", "F2R", "ERAP1", "GAS6", "DMD", "ADM", "FGFBP3", "RYR2", "CLNS1A", "SLC8A1", "NPR2", "VEGFA", "OLR1", "VEGFB", "GCLC",…
375	MAGNESIUM ION BINDING%GO%GO:0000287	7.85972e-06	6.21861e-05	0.593325	0.42484	2.39417	46	c("SNCA", "STK38L", "ICK", "BRSK1", "SNRK", "PIF1", "MAPK12", "EPHX2", "TSSK6", "PRTFDC1", "MSH2", "DYRK2", "FIGNL1", "GEM", "CDC42BPB", "HMGCL", "NUDT3", "PSPH", "STK36", "SRR", "LHPP", "STK11", "ATP10D", "MARK1", "NUDT16", "THG1L", "CDC42BPG", "OPA1", "HPGDS", "GCLC", "NUDT18", "NLK", "NUAK2")
376	CELLULAR RESPONSE TO STRESS%GO%GO:0033554	8.12801e-06	6.41378e-05	0.593325	0.23314	1.91797	346	c("SOX4", "CCND1", "SFRP1", "SPATA18", "MDFIC", "CRHBP", "GADD45A", "FGF1", "RAB23", "BRSK1", "SOD3", "RAD51AP1", "BCL2", "PKD2", "NET1", "KDELR3", "CAPN3", "PXDNL", "XPC", "MAPK12", "MAP2K5", "PPP1R15A", "PDK3", "TP53INP2", "CRADD", "TNIK", "EYA1", "ING4", "SCAMP5", "MDM4", "APOD", "GFPT1", "ATXN3", "HMGB2", "CRY2", "PLK3", "FAM129A", "TPR", "SMO", "GATA6", "DDIT3", "PLA2R1", "MSH2", "BCL2L11", …
377	CELL-CELL ADHESION%GO%GO:0016337	8.30218e-06	6.53384e-05	0.593325	0.344198	2.32813	94	c("THBS4", "KIT", "COL14A1", "THY1", "JAM2", "LEF1", "CNTN4", "TRO", "COL13A1", "CDH23", "ASTN1", "ITGA8", "DCHS1", "PTPRD", "PKD1L1", "COL8A2", "PODXL2", "SOX9", "MPZL2", "TNIP1", "CERCAM", "VCAM1", "AMIGO2", "THBS3", "ROBO1", "CADM1", "CLDN9", "PKD1", "PTPRM", "PLEKHA7", "COL19A1", "CCL5", "CLDN11", "CTNND2", "ZAP70", "CTNNA3", "NLGN1", "NPHP1", "CLDN1", "ATP2C1", "NLGN3", "VCL", "ROCK1", "PKP2…
378	TRANSCRIPTION FACTOR BINDING%GO%GO:0008134	8.43961e-06	6.62442e-05	0.593325	0.28982	2.14888	160	c("ENPP2", "MDFIC", "TCF4", "HDAC9", "FOXS1", "PRMT2", "NAAA", "BEX1", "APBB2", "ANKRD1", "FOXC2", "MYOCD", "DACT2", "LMO2", "FOXD2", "FOXI2", "PSIP1", "GATA6", "DDIT3", "JMJD1C", "TCF7L2", "ARNT2", "MED30", "PURA", "THRA", "BAZ1B", "WWP2", "HDAC5", "HDAC4", "PRDM5", "TP73", "AR", "TBX3", "ZNHIT3", "MEF2C", "TAF1", "COMMD6", "PPARGC1A", "SIRT1", "NFE2L2", "EP300", "MED12", "ARHGEF2", "STK36", "HE…
379	COLLAGEN FORMATION%REACTOME%REACT_120729.4	8.60825e-06	6.73896e-05	0.593325	0.44487	2.48675	44	c("TLL2", "COL14A1", "COL16A1", "COL10A1", "COL9A1", "COL21A1", "COL9A2", "COL13A1", "COL8A1", "COL24A1", "COL1A2", "LEPREL1", "PCOLCE2", "COL7A1", "COL8A2", "LEPREL2", "COL3A1", "COL22A1", "COL4A5", "COL19A1")
380	REGULATION OF TRANSMEMBRANE RECEPTOR PROTEIN SERINE/THREONINE KINASE SIGNALING PATHWAY%GO%GO:0090092	8.64703e-06	6.75151e-05	0.593325	0.403526	2.43688	58	c("SULF1", "BMP4", "TGFB3", "LTBP4", "ADAMTSL2", "FZD1", "DACT2", "PPP1R15A", "DAND5", "FOXD2", "INHBA", "BAMBI", "TRIM33", "BMP6", "VWC2", "CDKN2B", "HTRA3", "DACT1", "BMPR2", "MTMR4", "UBB", "RBPMS", "SIRT1", "BMPR1A", "BCL9", "HES5", "NEDD4L", "SMAD7", "GIPC1", "MAGI2", "PPP1CB", "ASPN", "STK11", "NBL1", "POU5F1")
381	NEGATIVE REGULATION OF CELL MIGRATION%GO%GO:0030336	8.75795e-06	6.79347e-05	0.593325	0.423522	2.38674	46	c("SULF1", "THY1", "IGFBP5", "SFRP1", "DPYSL3", "PODN", "APOE", "IGFBP3", "KANK1", "MAP2K5", "TP53INP1", "APOD", "RNF20", "PTGER4", "PTPRM", "PLCB1", "SFRP2", "FGF2", "HDAC5", "SMAD7", "VCL", "SP100", "PKP2", "MAGI2", "SRGAP2", "KRIT1", "NBL1")
382	EMBRYONIC MORPHOGENESIS%GO%GO:0048598	8.77268e-06	6.79347e-05	0.593325	0.353231	2.32325	83	c("FRZB", "HTR2B", "SOX4", "BMP4", "LEF1", "FOXS1", "AFF3", "SOX8", "PKD2", "FOXC2", "PRICKLE1", "LRP5", "SOX9", "SOX7", "WNT9A", "FOXI2", "IRX5", "CYP26B1", "SMO", "DACT1", "BBS4", "BMPR2", "CEP290", "STIL", "FZD6", "FGF2", "NPHP3", "ID2", "FGFR2", "TBX3", "FZD3", "DVL2", "MEF2C", "DVL3", "COBL", "MESP1", "PROX1", "PLXNB2", "HAND2", "COL2A1", "ZNF281", "POU5F1", "GATA4", "RYR2", "CTNNB1", "RTF1"…
383	I BAND%GO%GO:0031674	8.78798e-06	6.79347e-05	0.593325	0.470737	2.4812	36	c("KCNE1", "PAK1", "SCN3B", "SORBS2", "CAPN3", "ANKRD1", "NEXN", "NEB", "CSRP3", "ACTN2", "DST", "CAV3", "OBSCN", "MYPN", "CACNA1D", "SYNE2", "GCOM1", "KY", "LDB3", "RYR2", "CTNNB1", "SRI", "OBSL1", "MYOZ2", "SLC8A1", "PGM5", "DNAJB6", "CASQ2")
384	REGULATION OF METAL ION TRANSPORT%GO%GO:0010959	8.79236e-06	6.79347e-05	0.593325	0.388728	2.37638	61	c("KCNA5", "SNCA", "THY1", "SCN2B", "DRD4", "KCNE1", "SCN3B", "SCN4B", "BCL2", "PKD2", "CAPN3", "SLC30A1", "CAMK2B", "CACNA2D1", "CNKSR3", "CAMK2G", "CCL5", "WWP2", "KIF5B", "FHL1", "ACTN2", "CAV3", "ASPH", "CACNA1D", "P2RX7", "F2R", "NEDD4L", "CAMK2D", "ZP3", "PKP2", "TRPC1", "DMD", "STIM2", "HOMER1", "RYR2", "CTNNB1")
385	TRANSPORTER ACTIVITY%GO%GO:0005215	9.10057e-06	7.01335e-05	0.593325	0.247175	1.98336	267	c("KCNA5", "GRIA3", "HTR2B", "SLC26A4", "ABCG2", "SCN2B", "SLC1A7", "APOE", "KCNT2", "KCNE1", "KCNMA1", "ATP1B4", "CDH17", "CHRNA3", "RASSF9", "SLC16A4", "GLRB", "KCNS3", "ABCC8", "SCN3B", "SCN4B", "APOA1", "BCL2", "ATP1B2", "KCNA4", "SLC40A1", "PKD2", "KCNC4", "KCNK6", "SCARB1", "RYR3", "PKD1L1", "KCNMB4", "SLC5A7", "CACNA2D1", "SLC16A7", "SLC44A1", "LRP5", "APOM", "TPCN1", "SLC16A5", "KCNMB2", …
386	REGULATION OF INTRACELLULAR TRANSPORT%GO%GO:0032386	9.32412e-06	7.16701e-05	0.593325	0.343968	2.30701	91	c("TMEM30B", "SNCA", "SOX4", "THY1", "BMP4", "MDFIC", "XPO4", "TGFB3", "RAB23", "KANK1", "PKD2", "DACT3", "CAPN3", "FZD7", "APOD", "BAMBI", "IGF1", "PTPN14", "TPR", "TCF7L2", "DACT1", "DYRK2", "PKD1", "ABCA2", "MYO1C", "ASPH", "RBPMS", "SIRT1", "BMPR1A", "MDFI", "P2RX7", "F2R", "CAMK2D", "PSMD10", "RAB33B", "GAS6", "TRPC1", "DMD", "SLC25A5", "SCP2", "KHDRBS1", "POU5F1", "RBM22", "BBC3", "RYR2", "…
387	FEMALE PREGNANCY%GO%GO:0007565	9.52483e-06	7.30237e-05	0.593325	0.587013	2.47324	19	c("SFRP4", "COL16A1", "CRHBP", "NPPA", "TRO", "BCL2", "PCSK5", "HPGD", "RLN2", "PTHLH", "CLIC5")
388	POSITIVE REGULATION OF WNT RECEPTOR SIGNALING PATHWAY%GO%GO:0030177	9.65827e-06	7.38559e-05	0.593325	0.472225	2.46325	35	c("SFRP4", "SOX4", "SULF1", "SFRP1", "DKK2", "DIXDC1", "KANK1", "SULF2", "WNT2B", "BAMBI", "TRPM4", "DACT1", "RNF146", "SFRP2", "MACF1", "DAPK3", "FGFR2", "PPP2R3A", "NKD1", "HHEX", "TNKS", "ILK")
389	Basal cell carcinoma%KEGG%hsa05217	9.75298e-06	7.43884e-05	0.593325	0.518012	2.49156	27	c("FZD2", "BMP4", "LEF1", "GLI1", "FZD1", "WNT2B", "FZD7", "WNT9A", "SMO", "TCF7L2", "FZD6", "FZD3", "DVL2", "DVL3", "STK36", "PTCH2", "APC")
390	ORGANOPHOSPHATE METABOLIC PROCESS%GO%GO:0019637	9.79526e-06	7.45193e-05	0.593325	0.240336	1.93576	276	c("HTR2B", "PLCE1", "PDE5A", "ENPP2", "SLC44A5", "ARSJ", "NPPA", "GNB3", "RAB23", "APOA1", "INPP4B", "NMNAT2", "PIK3R1", "NT5C2", "NPPB", "PDE6A", "SLC44A1", "GNG11", "ALDH5A1", "AGPAT4", "PIK3C2B", "ASAH1", "AK5", "TP53I3", "GFPT1", "RAMP2", "PRTFDC1", "ARSD", "COL4A3BP", "PDE3B", "MBOAT2", "FMO2", "PTHLH", "RALBP1", "SULT1C4", "HEXB", "DCK", "PLA2G4C", "MSH2", "RND3", "PDE8B", "KIF20B", "AGPAT9…
391	CELL JUNCTION%GO%GO:0030054	9.88412e-06	7.50031e-05	0.593325	0.31336	2.23227	124	c("KCNA5", "POLR1E", "DSC1", "ENAH", "PAK1", "SCN4B", "BRSK1", "PKD2", "FERMT1", "EVL", "LIMA1", "EPHX2", "PERP", "AFAP1", "FGF13", "PDLIM7", "JAM3", "BAIAP2L2", "AMOT", "TJP1", "PSD3", "FBXO8", "CADM1", "CLDN9", "PTPRM", "PLEKHA7", "ABCB4", "CLDN11", "SHROOM2", "SYNM", "ACTN2", "DST", "CTNNA3", "PNMA1", "FGFR3", "CDK5RAP2", "SORBS1", "CDC42BPB", "BRCA1", "LPXN", "TJP2", "PDZD2", "NPHP1", "ERBB2I…
392	EGFR1%NETPATH%EGFR1	1.02223e-05	7.73712e-05	0.593325	0.270743	2.06243	186	c("PLCE1", "KIT", "SNCA", "ANTXR1", "JAK2", "PHLDB2", "PTPRR", "PAK1", "SH3GL2", "DYRK1B", "CRIM1", "BCL2", "FYN", "PIK3R1", "PLEKHA6", "DOCK1", "ANXA4", "PTPN11", "MCF2", "MAP2K5", "GAB2", "GSN", "PIK3C2B", "SDPR", "TNIP1", "EPHB3", "GRB10", "SHB", "RICTOR", "GAB1", "TRIM29", "CALD1", "AHNAK", "RALBP1", "DYNLL1", "SIAH2", "ARHGEF4", "EFNB2", "PRKAA2", "STAM", "PTPRA", "PRKD1", "KIAA1217", "MAP3K…
393	CATION TRANSMEMBRANE TRANSPORTER ACTIVITY%GO%GO:0008324	1.0284e-05	7.76402e-05	0.593325	0.305873	2.19473	131	c("KCNA5", "HTR2B", "SCN2B", "KCNT2", "KCNE1", "KCNMA1", "ATP1B4", "CHRNA3", "KCNS3", "ABCC8", "SCN3B", "SCN4B", "ATP1B2", "KCNA4", "SLC40A1", "PKD2", "KCNC4", "KCNK6", "RYR3", "PKD1L1", "KCNMB4", "SLC5A7", "CACNA2D1", "SLC44A1", "TPCN1", "KCNMB2", "ATP5S", "SLC2A10", "TRPM4", "ATP7B", "PKD1", "NNT", "SLC13A4", "SLC24A1", "SHROOM2", "KCNK17", "KCNS1", "ATP1A2", "SLC17A7", "SLC38A7", "ITPR1", "SCN…
394	REGULATION OF BODY FLUID LEVELS%GO%GO:0050878	1.03717e-05	7.81038e-05	0.593325	0.265949	2.04631	198	c("PDE5A", "NPR3", "PROS1", "F2RL2", "JAK2", "JAM2", "PDE1A", "DGKI", "KCNMB1", "LEFTY2", "PLAT", "TGFB2", "KCNMA1", "TGFB3", "WEE1", "COL1A2", "APOA1", "ATP1B2", "FYN", "VEGFC", "MAFK", "PIK3R1", "GATA5", "DOCK1", "KCNMB4", "PTPN11", "NPPB", "PDE6A", "CD47", "KCNMB2", "JAM3", "RASGRP1", "IGF1", "COL3A1", "KIF3C", "CABLES1", "PDE3B", "GUCY1A3", "ADAMTS13", "GATA6", "P2RY1", "JMJD1C", "GNAI1", "GP…
395	CELLULAR RESPONSE TO TRANSFORMING GROWTH FACTOR BETA STIMULUS%GO%GO:0071560	1.0442e-05	7.8236e-05	0.593325	0.411124	2.38972	51	c("FMOD", "SFRP1", "GDF10", "LEFTY2", "TGFB2", "GDF15", "TGFB3", "COL1A2", "ANKRD1", "USP9Y", "PPP1R15A", "SOX9", "HPGD", "COL3A1", "TRIM33", "SOX6", "CDKN2B", "MTMR4", "MEF2C", "UBB", "GDF9", "UBE2D1", "BMPR1A", "TFDP2", "NEDD4L", "LTBP2", "SMAD7", "SMAD5", "PPP1CB", "CLEC3B")
396	RESPONSE TO TRANSFORMING GROWTH FACTOR BETA STIMULUS%GO%GO:0071559	1.0442e-05	7.8236e-05	0.593325	0.411124	2.38972	51	c("FMOD", "SFRP1", "GDF10", "LEFTY2", "TGFB2", "GDF15", "TGFB3", "COL1A2", "ANKRD1", "USP9Y", "PPP1R15A", "SOX9", "HPGD", "COL3A1", "TRIM33", "SOX6", "CDKN2B", "MTMR4", "MEF2C", "UBB", "GDF9", "UBE2D1", "BMPR1A", "TFDP2", "NEDD4L", "LTBP2", "SMAD7", "SMAD5", "PPP1CB", "CLEC3B")
397	PROTEIN PHOSPHORYLATION%GO%GO:0006468	1.05004e-05	7.83e-05	0.593325	0.262177	2.03946	215	c("PLCE1", "KIT", "JAK2", "BMP4", "MDFIC", "STK38L", "IGFBP3", "DRD4", "PAK1", "TGFB2", "NTRK2", "DYRK1B", "ICK", "BRSK1", "RNASEL", "DDR1", "FYN", "SNRK", "CXCR4", "CAMK2B", "MAPK12", "MAP2K5", "PLK2", "PDK3", "TNIK", "TSSK6", "EPHB3", "COL4A3BP", "PLK3", "KIDINS220", "LMTK2", "ULK1", "EIF2AK2", "MAP4K4", "GHR", "CAMK2G", "NTF3", "NRBP2", "DYRK2", "PKD1", "SRPK3", "KALRN", "ATM", "PRKAA2", "CCL5…
398	UROGENITAL SYSTEM DEVELOPMENT%GO%GO:0001655	1.05033e-05	7.83e-05	0.593325	0.386278	2.38151	64	c("PLCE1", "PROM1", "MME", "SOX4", "SULF1", "BMP4", "FOXS1", "FGF1", "ACE", "PCSK5", "CRIP1", "SOX8", "PKD2", "FOXC2", "SULF2", "DACT2", "SOX9", "FOXD2", "EPHB3", "SMO", "PKD1", "CEP290", "FGF2", "NPHP3", "AR", "FGFR2", "MEF2C")
399	GOLGI VESICLE TRANSPORT%GO%GO:0048193	1.05363e-05	7.83486e-05	0.593325	0.40186	2.42682	58	c("SH3GL2", "KIF13A", "RAB26", "SPTBN1", "DOPEY1", "VPS41", "SORT1", "ANK1", "COG7", "BBS1", "LLGL1", "SEC31A", "SNAP23", "PRKD1", "GOLGA3", "MACF1", "SNX1", "KLHL12", "STX16", "MPPE1", "WIPI1", "GABARAPL2", "MON2", "SH3D19", "BBS2", "VPS13A", "STX7", "ARRB1", "OPTN", "PUM1", "RAB9B", "TRAPPC2", "GOPC", "VAMP2", "COG3", "GOLGA4", "COG1", "FTH1")
400	REGULATION OF CANONICAL WNT RECEPTOR SIGNALING PATHWAY%GO%GO:0060828	1.10944e-05	8.22926e-05	0.593325	0.39592	2.39995	59	c("SFRP4", "FRZB", "SOX4", "SFRP1", "DKK2", "LEF1", "GLI1", "DIXDC1", "PRICKLE1", "FZD1", "LRP5", "WNT2B", "SOX9", "SOX7", "BAMBI", "TRPM4", "DDIT3", "SIAH2", "TCF7L2", "RNF146", "FZD6", "SFRP2", "NPHP3", "DAPK3", "FGFR2", "PPP2R3A", "APC", "MESP1", "NKD1", "DKK3", "TNKS", "ILK")
401	RESPONSE TO INORGANIC SUBSTANCE%GO%GO:0010035	1.1147e-05	8.24764e-05	0.593325	0.405629	2.40062	55	c("HTR2B", "SNCA", "CRHBP", "KCNMA1", "SOD3", "BCL2", "CRIP1", "PKD2", "NET1", "CAPN3", "RYR3", "KCNMB4", "PXDNL", "KCNIP1", "KCNMB2", "ATP7B", "SEC31A", "MEF2C", "ASPH", "D2HGDH", "HBA2", "CDKN1B", "SIRT1", "NFE2L2", "HAAO", "ZACN", "CAT", "NEDD4L", "GPLD1", "TRPC1", "HOMER1", "MEF2A", "RYR2")
402	WNT-PROTEIN BINDING%GO%GO:0017147	1.12883e-05	8.33145e-05	0.593325	0.642684	2.49363	15	c("SFRP4", "FRZB", "FZD2", "SFRP1", "FZD1", "LRP5", "FZD7", "SMO", "FZD6", "SFRP2", "FZD3")
403	RESPONSE TO DRUG%GO%GO:0042493	1.15383e-05	8.49479e-05	0.593325	0.48586	2.48638	33	c("HTR2B", "CCND1", "SFRP1", "ABCG2", "CRHBP", "TGFB2", "BCL2", "FZD1", "APOD", "INHBA", "SLC22A18", "GATA6", "PTPRM", "ABCB4", "ABCA2", "MEF2C", "GPLD1", "GAS6", "REST", "PPM1E", "SEMA3C", "GATA4", "CTNNB1")
404	KINASE ACTIVITY%GO%GO:0016301	1.16014e-05	8.52017e-05	0.593325	0.257634	2.02146	229	c("KIT", "EPHA3", "JAK2", "STK38L", "PAK1", "TGFB2", "NTRK2", "LTBP4", "WEE1", "DYRK1B", "ICK", "BRSK1", "CRIM1", "DDR1", "FYN", "SNRK", "NT5C2", "MAPK12", "MAP2K5", "PLK2", "SOX9", "PDK3", "TNIK", "TSSK6", "PIK3C2B", "AK5", "EPHB3", "COL4A3BP", "PLK3", "LMTK2", "ULK1", "EIF2AK2", "NRP1", "MAP4K4", "DCK", "NRBP2", "CLK4", "DYRK2", "BMPR2", "SRPK3", "AKAP13", "PIP4K2B", "ATM", "NUAK1", "BUB1", "PR…
405	Axon guidance%KEGG%hsa04360	1.17126e-05	8.5806e-05	0.593325	0.401346	2.38194	56	c("EPHA3", "PAK1", "SEMA5B", "FYN", "UNC5B", "CXCR4", "LRRC4C", "SEMA6A", "EPHB3", "ARHGEF12", "SEMA3G", "SEMA5A", "NRP1", "NTN4", "ROBO1", "GNAI1", "SEMA6D", "SEMA3D", "EFNB2", "SRGAP3", "CDK5", "SEMA3B", "EFNB3", "SEMA6C", "EPHA7", "CFL2", "ROCK1", "EPHA5", "RGS3", "PLXNB2", "SEMA4G", "SEMA3C", "SRGAP2")
406	BONE MORPHOGENESIS%GO%GO:0060349	1.19925e-05	8.76399e-05	0.593325	0.609516	2.45777	17	c("FREM1", "BMP4", "EVC", "COL13A1", "RAB23", "LRP5", "SOX9", "CYP26B1", "FGFR2", "MEF2C", "FGFR3", "DDR2")
407	AXON GUIDANCE%REACTOME%REACT_18266.1	1.21395e-05	8.84963e-05	0.593325	0.314419	2.21755	116	c("ST8SIA2", "COL9A1", "SCN2B", "JAK2", "DPYSL3", "AGRN", "ENAH", "PAK1", "HFE2", "COL9A2", "SH3GL2", "MYH11", "SCN3B", "ST8SIA4", "MYH10", "FYN", "UNC5B", "DOCK1", "PTPN11", "EVL", "SPTBN1", "MYO10", "DLG4", "SEMA6A", "ARHGEF12", "ANK1", "SEMA5A", "SPTAN1", "NRP1", "SIAH2", "NTN4", "ROBO1", "COL4A5", "SEMA6D", "DPYSL4", "PTPRA", "ITGA9", "RRAS", "SRGAP3", "CDK5", "GPC1", "CLASP1", "SOS2", "SCN3A…
408	TGF_BETA_RECEPTOR%NETPATH%TGF_BETA_RECEPTOR	1.23009e-05	8.94528e-05	0.593325	0.335262	2.2758	97	c("CCND1", "ESR1", "RUNX2", "TCF4", "LEF1", "STAMBPL1", "TGFB2", "XPO4", "TGFB3", "ZEB1", "PIK3R1", "CAMK2B", "SPTBN1", "PPP1R15A", "SOX9", "BTRC", "TRIM33", "SDC2", "CAMK2G", "ZEB2", "SNX1", "TP73", "AR", "ANAPC10", "MEF2C", "CAMK2A", "UBE2D1", "PIAS2", "BRCA1", "EP300", "ERBB2IP", "TFDP2", "NFYC", "PIK3R2", "NEDD4L", "CAMK2D", "SMAD7", "PIAS1", "ROCK1", "IRF2BP1", "GIPC1", "PJA1", "STK11", "TRA…
409	REGULATION OF CELLULAR COMPONENT BIOGENESIS%GO%GO:0044087	1.24705e-05	9.04648e-05	0.593325	0.318181	2.21974	110	c("SNCA", "EPHA3", "SFRP1", "DPYSL3", "SNCAIP", "HRK", "AGRN", "BDNF", "PPP1R16B", "PAK1", "TGFB3", "KANK1", "HAS3", "CLIP3", "MYO10", "GSN", "APOD", "EPHB3", "AMOT", "BBS10", "TPR", "BBS4", "BCL2L11", "PTGER4", "THRA", "TSC1", "MACF1", "CLU", "MYO1C", "CAV3", "TAF1", "ALMS1", "MAPT", "BMF", "NLGN1", "SYNPO", "APC", "PROX1", "PARK2", "TERF1", "NLGN3", "RAB33B", "ROCK1", "JMY", "PKP2", "REST", "PP…
410	ENZYME ACTIVATOR ACTIVITY%GO%GO:0008047	1.25982e-05	9.11679e-05	0.593325	0.333361	2.26411	96	c("HTR2B", "THY1", "RGS4", "APOE", "IGFBP3", "RGS11", "GUCA1C", "RGS5", "TPD52L1", "APOA1", "RABGAP1L", "DOCK1", "ALDH1A1", "PCOLCE2", "ARHGAP1", "RGS17", "FGF13", "RGS6", "RALBP1", "RABGAP1", "ALS2", "LLGL1", "PLCB1", "CCL5", "NLRP1", "MMP15", "RASAL2", "MMP24", "CDKN1B", "SYNGAP1", "AFAP1L2", "ARHGEF6", "APOC1", "TBC1D15", "TERF1", "ELMOD2", "RGS3", "ARRB1", "GAS6", "USP6NL", "LRRK2", "IGF2", "…
411	Regulation of actin cytoskeleton%KEGG%hsa04810	1.27145e-05	9.17749e-05	0.593325	0.34185	2.27638	87	c("PDGFD", "ENAH", "PAK1", "FGF1", "FGF18", "IQGAP2", "MYL7", "MYH10", "ITGA8", "PIK3R1", "TIAM2", "DOCK1", "RRAS2", "ITGA10", "MYL5", "PFN4", "FGF13", "GSN", "ARHGEF12", "ARHGEF4", "MRAS", "PIP4K2B", "ITGA9", "FGF2", "PDGFC", "ACTN2", "RRAS", "FGFR2", "FGFR3", "ITGAE", "FGF9", "SOS2", "ARHGEF6", "APC", "PIK3R2", "F2R", "CFL2", "VCL", "ROCK1", "MYL9", "ABI2", "PIK3CG", "PPP1CB", "ITGB7", "ITGB4",…
412	EPITHELIAL TUBE MORPHOGENESIS%GO%GO:0060562	1.27439e-05	9.17749e-05	0.593325	0.400892	2.36533	54	c("SOX4", "BMP4", "LEF1", "PAK1", "FOXS1", "FGF1", "SOX8", "PKD2", "FOXC2", "PRICKLE1", "LRP5", "SOX9", "FOXD2", "SMO", "BBS4", "PKD1", "STIL", "FZD6", "SFRP2", "FGF2", "NPHP3", "FGFR2", "FZD3", "DVL2", "MEF2C", "COBL", "MESP1", "PLXNB2", "HAND2", "GATA4", "RYR2", "CTNNB1", "SETDB2", "VEGFA", "GATA3")
413	ACTIN BINDING%GO%GO:0003779	1.27964e-05	9.19294e-05	0.593325	0.397905	2.384	57	c("ANTXR1", "PLEKHH2", "TNNT3", "KCNMA1", "FSCN1", "ACE", "IQGAP2", "MYH10", "SVIL", "CXCR4", "LIMA1", "MYO10", "MARCKS", "TNNI3", "NEXN", "SHROOM2", "MACF1", "SHROOM1", "SORBS1", "MYO16", "COBL", "SYNPO", "MYO6", "TNNI1", "SYNE2", "TNNC2", "VCL", "MICAL2", "GIPC1", "DMD", "LSP1", "TWF2", "PDLIM5", "CORO6", "SPTB")
414	CELL ACTIVATION%GO%GO:0001775	1.33353e-05	9.55697e-05	0.593325	0.292331	2.13968	148	c("KIT", "PROS1", "SOX4", "F2RL2", "TNFRSF4", "DGKI", "LEF1", "LEFTY2", "TGFB2", "HDAC9", "TGFB3", "DPP4", "COL1A2", "APOA1", "BCL2", "RSAD2", "FYN", "VEGFC", "PIK3R1", "S100A13", "BTN3A1", "RASGRP1", "IGF1", "COL3A1", "ADAMTS13", "P2RY1", "VCAM1", "CADM1", "GNAI1", "GP1BA", "ICOSLG", "MSH2", "PTGER4", "ATM", "GNG2", "PLCB1", "CCL5", "ZAP70", "HDAC5", "HDAC4", "ACTN2", "CLU", "MEF2C", "TOLLIP", "…
415	REGULATION OF PROTEIN SERINE/THREONINE KINASE ACTIVITY%GO%GO:0071900	1.35841e-05	9.71178e-05	0.593325	0.322594	2.25642	112	c("HTR2B", "PLCE1", "KIT", "SNCA", "CCND1", "BMP4", "UCHL1", "MDFIC", "RGS4", "APOE", "STK38L", "DRD4", "PAK1", "HERC5", "GADD45A", "CCND2", "TPD52L1", "PKD2", "CXCR4", "MYOCD", "MAP2K5", "LRP5", "EDN3", "GHR", "ALS2", "NTF3", "CDKN2B", "PKD1", "DUSP6", "ADORA2B", "FGF2", "TP73", "DUSP16", "CAV3", "DVL2", "UBB", "DVL3", "CDKN1B", "SIRT1", "DUSP8", "S1PR2", "MAPK10", "APC", "PROX1", "CDKN2C", "PSM…
416	REGULATION OF CELL PROJECTION ORGANIZATION%GO%GO:0031344	1.41786e-05	0.000101124	0.593325	0.351663	2.30785	81	c("EPHA3", "THY1", "DPYSL3", "APOE", "AGRN", "PPP1R16B", "CHN1", "CHRNA3", "NTRK2", "TGFB3", "DIXDC1", "KANK1", "SIPA1L1", "CAMK2B", "PTPRD", "MYO10", "LRRC4C", "TNIK", "FGF13", "EPHB3", "SDC2", "SARM1", "ROBO1", "BBS4", "PRKD1", "ISLR2", "RTN4R", "CDK5", "PACSIN1", "MAPT", "CBFA2T2", "NLGN1", "COBL", "ITM2C", "APC", "LINGO1", "RAP2A", "LRRK2", "DMD", "FRMD7", "TWF2", "GPM6A", "AKT1", "PDLIM5")
417	REGULATION OF NEURON PROJECTION DEVELOPMENT%GO%GO:0010975	1.46893e-05	0.000104357	0.593325	0.379383	2.36167	66	c("EPHA3", "THY1", "DPYSL3", "APOE", "CHN1", "CHRNA3", "NTRK2", "DIXDC1", "KANK1", "SIPA1L1", "CAMK2B", "PTPRD", "LRRC4C", "TNIK", "FGF13", "EPHB3", "SDC2", "SARM1", "ROBO1", "PRKD1", "ISLR2", "RTN4R", "CDK5", "PACSIN1", "MAPT", "CBFA2T2", "NLGN1", "COBL", "ITM2C", "LINGO1", "RAP2A", "LRRK2", "DMD", "FRMD7", "TWF2", "AKT1", "PDLIM5", "CAPRIN1", "NGEF", "ACHE", "BCL11A", "HDAC2", "CAPRIN2", "CDK5R…
418	WNT%IOB%WNT	1.47372e-05	0.000104357	0.593325	0.41188	2.4052	52	c("SFRP4", "FRZB", "FZD2", "CCND1", "SFRP1", "TCF4", "LEF1", "DIXDC1", "FZD1", "LRP5", "FZD7", "WNT9A", "BTRC", "ARHGEF4", "TCF7L2", "FZD6", "SFRP2", "RSPO3", "FZD3", "DVL2", "MAP3K1", "DVL3", "WIF1", "BCL9", "APC", "ARRB1", "ILK", "ROR1", "PRKCA", "MAP3K7", "AKT1", "CTNNB1", "SETDB1")
419	WNT%NETPATH%WNT	1.47372e-05	0.000104357	0.593325	0.41188	2.4052	52	c("SFRP4", "FRZB", "FZD2", "CCND1", "SFRP1", "TCF4", "LEF1", "DIXDC1", "FZD1", "LRP5", "FZD7", "WNT9A", "BTRC", "ARHGEF4", "TCF7L2", "FZD6", "SFRP2", "RSPO3", "FZD3", "DVL2", "MAP3K1", "DVL3", "WIF1", "BCL9", "APC", "ARRB1", "ILK", "ROR1", "PRKCA", "MAP3K7", "AKT1", "CTNNB1", "SETDB1")
420	POST-GOLGI VESICLE-MEDIATED TRANSPORT%GO%GO:0006892	1.48957e-05	0.000105228	0.593325	0.488392	2.48861	32	c("SH3GL2", "KIF13A", "RAB26", "SPTBN1", "DOPEY1", "SORT1", "BBS1", "LLGL1", "SNAP23", "MACF1", "WIPI1", "MON2", "SH3D19", "BBS2", "VPS13A", "STX7", "ARRB1", "OPTN", "PUM1", "RAB9B", "GOPC", "VAMP2", "GOLGA4", "FTH1")
421	APOPTOTIC PROCESS%GO%GO:0006915	1.49401e-05	0.00010529	0.593325	0.254095	1.99475	230	c("SNCA", "EPHA3", "SFRP1", "JAK2", "IER3", "LEF1", "IFIT2", "GADD45A", "TPD52L1", "BCL2", "TNFSF10", "MLLT11", "PNMA2", "CRIP1", "UNC5B", "NET1", "TIAM2", "CAPN3", "ARHGEF3", "CXCR4", "PDIA2", "MCF2", "MAP2K5", "CRADD", "SOX7", "ING4", "GSN", "SEMA6A", "KIAA0141", "GZMA", "TP53I3", "MDM4", "SORT1", "TNFRSF25", "HMGB2", "PLK3", "ARHGEF12", "TJP1", "SPTAN1", "DDIT3", "DYNLL1", "SIAH2", "ARHGEF4", …
422	PHOSPHORIC DIESTER HYDROLASE ACTIVITY%GO%GO:0008081	1.58434e-05	0.000111392	0.57561	0.489853	2.45156	31	c("HTR2B", "PLCE1", "PDE5A", "F2RL2", "ENPP2", "EDNRA", "PDE1A", "PDE1C", "PDE6A", "PDE3B", "PDE8B", "PLCB1", "CCL5", "PLCB4", "PDE6B", "MPPE1")
423	WNT_SIGNALING%MSIGDB_C2%WNT_SIGNALING	1.64876e-05	0.000115647	0.57561	0.4428	2.42832	42	c("SFRP4", "FRZB", "FZD2", "CCND1", "SFRP1", "LEF1", "CCND2", "DIXDC1", "FZD1", "LRP5", "WNT2B", "CXXC4", "FZD7", "WNT9A", "BTRC", "FZD6", "FZD3", "DVL2", "FBXW11", "WIF1", "BCL9", "EP300", "APC")
424	SINGLE-ORGANISM BIOSYNTHETIC PROCESS%GO%GO:0044711	1.65848e-05	0.000116055	0.57561	0.325053	2.22849	102	c("GATM", "SNCA", "SLC44A5", "TM7SF2", "TGFB2", "ELOVL4", "APOA1", "CDO1", "LTC4S", "SLC44A1", "CYP46A1", "DECR2", "CSPG5", "CHST14", "BDH2", "GAMT", "FGF2", "LCAT", "MGST3", "SLC27A1", "HMGCL", "MAT2B", "ACOX2", "PSPH", "HAAO", "UROS", "LPL", "CYP7B1", "LIAS", "ACADM", "SRR", "OAT", "GLS2", "SCP2", "CHKB", "HAND2", "ADM", "MLYCD", "SLC44A2", "SAMD8", "APIP", "IDI2", "COQ3", "GLUD1", "NPC1L1", "C…
425	SEQUENCE-SPECIFIC DNA BINDING RNA POLYMERASE II TRANSCRIPTION FACTOR ACTIVITY%GO%GO:0000981	1.67034e-05	0.000116336	0.57561	0.350369	2.31266	84	c("SOX4", "ESR1", "TCF4", "LEF1", "FOXS1", "DBP", "PLAGL1", "FOXC2", "MYOCD", "ZNF444", "SOX9", "LMO2", "FOXD2", "FOXI2", "GATA6", "GABPA", "ZSCAN1", "PURA", "ZSCAN18", "THRA", "ZNF287", "ZNF641", "AR", "MEF2C", "KLF11", "PTGER3", "NR1D2", "BRD8", "PROX1", "HES5", "NFIB", "FOXP1", "CLOCK", "ESRRB", "ZNF18", "PLAG1", "REST", "HAND2", "NFIX", "USF2", "ZNF446", "MEF2A", "POU5F1", "FOXP2", "MEF2D", "…
426	TGF_BETA_RECEPTOR%IOB%TGF_BETA_RECEPTOR	1.67034e-05	0.000116336	0.57561	0.343926	2.28047	86	c("CCND1", "ESR1", "RUNX2", "LEF1", "STAMBPL1", "TGFB2", "XPO4", "TGFB3", "ZEB1", "PIK3R1", "CAMK2B", "SPTBN1", "SOX9", "BTRC", "SDC2", "CAMK2G", "ZEB2", "SNX1", "TP73", "AR", "ANAPC10", "MEF2C", "CAMK2A", "UBE2D1", "PIAS2", "BRCA1", "EP300", "ERBB2IP", "TFDP2", "NFYC", "PIK3R2", "NEDD4L", "CAMK2D", "SMAD7", "PIAS1", "ROCK1", "IRF2BP1", "GIPC1", "PJA1", "STK11", "MAP3K7", "RBX1", "MEF2A", "FZR1",…
427	Neurotrophin signaling pathway%KEGG%hsa04722	1.70926e-05	0.000118768	0.57561	0.441546	2.42144	42	c("BDNF", "NTRK2", "BCL2", "PIK3R1", "CAMK2B", "PTPN11", "MAPK12", "MAP2K5", "SORT1", "GAB1", "KIDINS220", "CAMK2G", "NTF3", "TP73", "SHC4", "YWHAQ", "MAP3K1", "CAMK2A", "SOS2", "MAPK10", "PIK3R2", "CAMK2D", "RAP1A", "PIK3CG", "SH2B1", "TRAF6", "AKT1")
428	REGULATION OF TRANSMISSION OF NERVE IMPULSE%GO%GO:0051969	1.72378e-05	0.000119497	0.57561	0.4624	2.412	35	c("SNCA", "SNCAIP", "APOE", "DRD4", "CNTN4", "CHRNA3", "USP46", "SIPA1L1", "SLC30A1", "CAMK2B", "KCNMB4", "DLG4", "PLK2", "LGI1", "MEF2C", "CDK5", "SYNGAP1", "NLGN1", "HES5", "NLGN3", "GIPC1")
429	RESPONSE TO OXYGEN-CONTAINING COMPOUND%GO%GO:1901700	1.74533e-05	0.000120708	0.57561	0.257101	2.01113	222	c("SNCA", "SOX4", "EPHA3", "SOCS2", "IGFBP5", "SFRP1", "JAK2", "ESR1", "APOE", "CRHBP", "DRD4", "TGFB2", "KCNMA1", "GNB3", "HDAC9", "APLP1", "FOXS1", "TGFB3", "FGF1", "FGF18", "COLEC12", "ATP6V1G2", "SOD3", "PKD2", "NET1", "PIK3R1", "SCARB1", "ANKRD1", "FOXC2", "RYR3", "PXDNL", "PTPN11", "GNG11", "SOX9", "PDK3", "FZD7", "WNT9A", "APOD", "SORT1", "GRB10", "HMGB2", "OSBPL7", "UBR1", "GAB1", "PLK3",…
430	TRANSCRIPTION FROM RNA POLYMERASE II PROMOTER%GO%GO:0006366	1.77858e-05	0.000122722	0.57561	0.261819	2.01306	199	c("ESR1", "RUNX2", "TCF4", "LEF1", "NPPA", "CREB5", "PLAGL1", "HLF", "RORA", "NR2F1", "ZNF444", "LMO2", "RARB", "NR2C1", "TRIM33", "TRIM29", "GATA6", "KLF5", "DDIT3", "NR3C1", "GABPA", "ZSCAN1", "CDKN2B", "MED30", "TCFL5", "ZSCAN18", "BMPR2", "THRA", "ZNF287", "ZNF641", "NR0B2", "AR", "GTF2F2", "ETV1", "DVL2", "MEF2C", "UBB", "TAF1", "KLF11", "SRRM1", "NFE2L1", "UBE2D1", "NR1D2", "SNAPC5", "PPARG…
431	POSITIVE REGULATION OF PROTEIN KINASE ACTIVITY%GO%GO:0045860	1.78934e-05	0.000123178	0.57561	0.306951	2.18662	124	c("HTR2B", "PLCE1", "KIT", "SNCA", "CCND1", "JAK2", "BMP4", "MDFIC", "DRD4", "PAK1", "TGFB2", "CHRNA3", "CCND2", "TPD52L1", "PKD2", "KDELR3", "CXCR4", "MAP2K5", "TNIK", "FGF13", "GFPT1", "EDN3", "KIDINS220", "PILRB", "DDIT3", "GHR", "ALS2", "NTF3", "SEC31A", "PKD1", "ADCY2", "ADORA2B", "FGF2", "DOK7", "DCTN1", "DVL2", "MAP3K1", "UBB", "DVL3", "WIPI1", "SIRT1", "DDR2", "AFAP1L2", "S1PR2", "MAPK10"…
432	LIPID BIOSYNTHETIC PROCESS%GO%GO:0008610	1.81022e-05	0.000124327	0.57561	0.285961	2.09244	147	c("ST8SIA2", "HTR2B", "PLCE1", "SLC44A5", "TM7SF2", "ST8SIA5", "ELOVL4", "APOA1", "INPP4B", "ST8SIA4", "PIK3R1", "CYP11A1", "SLC44A1", "AGPAT4", "PIK3C2B", "COL4A3BP", "MBOAT2", "CYP46A1", "DECR2", "PEX7", "PLA2G4C", "AGPAT9", "PIP4K2B", "ATM", "MTMR4", "PRKAA2", "HSD17B8", "PRKD1", "FGF2", "LCAT", "SRD5A1", "PGAP1", "PIGK", "MPPE1", "PIGM", "SLC27A1", "PIGZ", "PIGP", "DPM3", "ACOX2", "LPL", "CYP…
433	MUSCLE TISSUE DEVELOPMENT%GO%GO:0060537	1.83863e-05	0.000125987	0.57561	0.406114	2.34004	50	c("BMP4", "TGFB2", "FOXS1", "MYH11", "PKD2", "ANKRD1", "FOXC2", "SVIL", "MYOCD", "TNNI3", "SORT1", "IGF1", "SRPK3", "CSRP3", "CBY1", "FGFR2", "MEF2C", "MESP1", "PROX1", "F2R", "SMAD7", "MYL6B", "FOXP1", "PKP2", "LRRK2", "MEF2A", "GATA4", "RYR2", "FOXP2", "OBSL1", "SLC8A1", "VEGFA", "NF1", "ZFPM2", "NEBL", "TNNC1", "MYLK", "WT1")
434	RESPONSE TO CALCIUM ION%GO%GO:0051592	1.84289e-05	0.000125988	0.57561	0.548718	2.44267	22	c("HTR2B", "CRHBP", "KCNMA1", "CAPN3", "RYR3", "KCNMB4", "KCNIP1", "KCNMB2", "SEC31A", "MEF2C", "ASPH", "D2HGDH", "GPLD1", "TRPC1", "HOMER1", "MEF2A", "RYR2")
435	ACTIN FILAMENT-BASED MOVEMENT%GO%GO:0030048	1.85797e-05	0.000126726	0.57561	0.57001	2.43568	20	c("TNNT1", "TNNT3", "MYL1", "MYL7", "TPM3", "MYH10", "TNNI3", "NEB", "ACTN2", "MYO6", "TNNI1", "SYNE2", "TNNC2", "MYL6B", "DMD")
436	DEVELOPMENT OF PRIMARY MALE SEXUAL CHARACTERISTICS%GO%GO:0046546	1.89318e-05	0.000128832	0.57561	0.562497	2.46073	21	c("KIT", "SOX15", "SOX8", "WNT2B", "SOX9", "INHBA", "MAMLD1", "GATA6", "LRRC6", "MSH2", "LHCGR", "TBX3", "FGF9", "KITLG", "CSDE1", "GATA4", "CTNNB1")
437	REGULATION OF NEUROLOGICAL SYSTEM PROCESS%GO%GO:0031644	1.98566e-05	0.000134816	0.57561	0.457812	2.42645	37	c("SNCA", "SNCAIP", "APOE", "DRD4", "CNTN4", "CHRNA3", "USP46", "SIPA1L1", "SLC30A1", "CAMK2B", "KCNMB4", "DLG4", "PLK2", "LGI1", "MEF2C", "CDK5", "SYNGAP1", "NLGN1", "HES5", "F2R", "NLGN3", "GIPC1")
438	NEGATIVE REGULATION OF CATALYTIC ACTIVITY%GO%GO:0043086	2.05867e-05	0.00013864	0.57561	0.267781	2.01936	177	c("SERPINE2", "SNCA", "PROS1", "THY1", "SYTL2", "SFRP1", "PIK3IP1", "BMP4", "UCHL1", "FARP1", "RGS4", "APOE", "SERPINI1", "STK38L", "MYO1D", "LEF1", "DRD4", "TGFB2", "IFIT1", "AZIN1", "RECK", "NES", "PIF1", "SERPINF1", "MYOCD", "KIAA1244", "MAP2K5", "LRP5", "GZMA", "TNNI3", "ATPIF1", "SORT1", "BICD1", "LMTK3", "CRY2", "SOCS4", "SIAH2", "PLA2R1", "DUSP6", "SPINT2", "VTN", "ZCCHC9", "FGFR1OP", "TP7…
439	COLLAGEN BINDING%GO%GO:0005518	2.06354e-05	0.00013864	0.57561	0.59754	2.40948	17	c("COMP", "ANTXR1", "COL14A1", "LUM", "PODN", "PAK1", "DDR1", "PCOLCE2", "ITGA10")
440	SENSORY ORGAN DEVELOPMENT%GO%GO:0007423	2.06685e-05	0.00013864	0.57561	0.35822	2.30305	74	c("FRZB", "PROM1", "THY1", "TGFB2", "FOXS1", "DIXDC1", "SOX8", "NES", "FOXC2", "PTPN11", "LRP5", "WNT2B", "SOX9", "WNT9A", "FOXI2", "INHBA", "SMO", "BBS4", "BMPR2", "CEP290", "FZD6", "PTPRM", "SHROOM2", "FGFR2", "FZD3", "TSPAN12", "DVL2", "DVL3", "NPHP1", "PPP2R3A", "PROX1", "HES5", "NKD1", "CHRDL1", "RAB3GAP1", "GPM6A", "FOXP2", "CTNNB1", "PAX6", "ATP6V1B1", "SMARCD3", "VEGFA", "NF1", "GATA3", "…
441	Pathways in cancer%KEGG%hsa05200	2.06695e-05	0.00013864	0.57561	0.291543	2.1072	138	c("FZD2", "KIT", "CCND1", "BMP4", "LEF1", "TGFB2", "TGFB3", "GLI1", "FGF1", "FGF18", "BCL2", "TPM3", "VEGFC", "PIK3R1", "LAMA2", "FZD1", "LAMA4", "WNT2B", "LAMC3", "FGF13", "FZD7", "WNT9A", "RARB", "IGF1", "TPR", "SMO", "RALBP1", "TCF7L2", "ARNT2", "COL4A5", "CDKN2B", "MSH2", "FZD6", "FGF2", "CTNNA3", "DAPK3", "AR", "FGFR2", "FZD3", "DVL2", "SKP2", "DVL3", "FGFR3", "FGF9", "RUNX1T1", "PIAS2", "CD…
442	REGULATION OF EPITHELIAL CELL PROLIFERATION%GO%GO:0050678	2.06788e-05	0.00013864	0.57561	0.378155	2.31135	62	c("THBS4", "HTR2B", "SULF1", "SFRP1", "BMP4", "APOE", "TGFB2", "SCG2", "SOX9", "FZD7", "ATPIF1", "HMGB2", "IGF1", "BMP6", "SMO", "NRP1", "THBS3", "ROBO1", "CDKN2B", "BMPR2", "PTPRM", "SFRP2", "PRKD1", "FGF2", "FGFR2", "TNFSF12", "PROX1", "NFIB", "FOXP1", "KRIT1", "PRKCA", "FBXW7", "FOXP2", "CTNNB1", "AGGF1", "VEGFA", "NF1", "GATA3", "VEGFB")
443	Z DISC%GO%GO:0030018	2.07003e-05	0.00013864	0.57561	0.477544	2.44382	33	c("KCNE1", "PAK1", "SCN3B", "SORBS2", "CAPN3", "NEXN", "NEB", "CSRP3", "ACTN2", "DST", "CAV3", "OBSCN", "MYPN", "CACNA1D", "SYNE2", "KY", "LDB3", "RYR2", "CTNNB1", "SRI", "OBSL1", "MYOZ2", "SLC8A1", "PGM5", "DNAJB6", "CASQ2", "NEBL")
444	DEVELOPMENTAL GROWTH%GO%GO:0048589	2.08297e-05	0.00013919	0.57561	0.510027	2.47762	28	c("BMP4", "EVC", "PRMT2", "FGF1", "SOX9", "FOXD2", "APOD", "IGF1", "SMO", "FGFR2", "CDK5", "FGFR3", "DDR2", "COBL", "MESP1", "APP", "NLGN3", "NACA", "MAGI2", "ARIH2")
445	MORPHOGENESIS OF AN EPITHELIUM%GO%GO:0002009	2.08845e-05	0.00013919	0.57561	0.378643	2.31473	61	c("SOX4", "BMP4", "LEF1", "PAK1", "FOXS1", "FGF1", "DDR1", "SOX8", "PKD2", "FOXC2", "PRICKLE1", "LRP5", "SOX9", "FOXD2", "SMO", "BBS4", "PKD1", "STIL", "FZD6", "SFRP2", "FGF2", "NPHP3", "FGFR2", "FZD3", "DVL2", "MEF2C", "DVL3", "COBL", "MESP1", "VCL", "PLXNB2", "HAND2", "GATA4", "RYR2", "CTNNB1", "SETDB2", "VEGFA", "GATA3")
446	NEURAL TUBE DEVELOPMENT%GO%GO:0021915	2.0923e-05	0.00013919	0.57561	0.568171	2.42783	20	c("SOX4", "ALDH1A2", "PKD2", "PRICKLE1", "SMO", "BBS4", "PKD1", "STIL", "FZD6", "FZD3", "DVL2", "COBL", "PROX1", "HES5", "PLXNB2")
447	SMALL GTPASE MEDIATED SIGNAL TRANSDUCTION%GO%GO:0007264	2.13153e-05	0.000141482	0.57561	0.336377	2.25274	90	c("PLCE1", "ARHGAP24", "RHOBTB1", "CHN1", "ARHGAP28", "COL1A2", "NET1", "TIAM2", "ARHGEF3", "ARHGAP1", "ARHGAP19", "RGL1", "MCF2", "MAPK12", "PLK2", "RASGRP1", "IGF1", "ARHGEF12", "RALBP1", "SIAH2", "ARHGEF4", "RAPGEF6", "CHN2", "MRAS", "KALRN", "AKAP13", "ARHGEF9", "FGF2", "RIN2", "RRAS", "SRGAP3", "OBSCN", "TAX1BP3", "SOS2", "ARHGEF6", "RHOT2", "ARHGEF2", "ARHGDIG", "RAP2A", "PIK3R2", "ROCK1", …
448	TISSUE MORPHOGENESIS%GO%GO:0048729	2.18428e-05	0.00014466	0.57561	0.349709	2.3147	85	c("SOX4", "BMP4", "LEF1", "PAK1", "TGFB2", "FOXS1", "FGF1", "COL1A2", "DDR1", "SOX8", "PKD2", "ANKRD1", "FOXC2", "PRICKLE1", "LRP5", "SOX9", "FOXD2", "TNNI3", "SMO", "BBS4", "PKD1", "BMPR2", "STIL", "FZD6", "SFRP2", "FGF2", "NPHP3", "FGFR2", "TBX3", "FZD3", "DVL2", "MEF2C", "DVL3", "BMPR1A", "COBL", "MESP1", "PROX1", "SMAD7", "VCL", "PLXNB2", "PKP2", "HAND2", "GATA4", "RYR2", "CTNNB1", "SETDB2", …
449	HEMOSTASIS%GO%GO:0007599	2.19432e-05	0.000145001	0.57561	0.264986	2.01857	186	c("PDE5A", "PROS1", "F2RL2", "JAK2", "JAM2", "PDE1A", "DGKI", "KCNMB1", "LEFTY2", "PLAT", "TGFB2", "KCNMA1", "TGFB3", "WEE1", "COL1A2", "APOA1", "ATP1B2", "FYN", "VEGFC", "MAFK", "PIK3R1", "GATA5", "DOCK1", "KCNMB4", "PTPN11", "PDE6A", "CD47", "KCNMB2", "JAM3", "RASGRP1", "IGF1", "COL3A1", "KIF3C", "CABLES1", "PDE3B", "GUCY1A3", "ADAMTS13", "GATA6", "P2RY1", "JMJD1C", "GNAI1", "GP1BA", "MFN2", "G…
450	BLOOD COAGULATION%GO%GO:0007596	2.22449e-05	0.000146343	0.57561	0.268505	2.04014	183	c("PDE5A", "PROS1", "F2RL2", "JAK2", "JAM2", "PDE1A", "DGKI", "KCNMB1", "LEFTY2", "PLAT", "TGFB2", "KCNMA1", "TGFB3", "WEE1", "COL1A2", "APOA1", "ATP1B2", "FYN", "VEGFC", "MAFK", "PIK3R1", "GATA5", "DOCK1", "KCNMB4", "PTPN11", "PDE6A", "CD47", "KCNMB2", "JAM3", "RASGRP1", "IGF1", "COL3A1", "KIF3C", "CABLES1", "PDE3B", "GUCY1A3", "ADAMTS13", "GATA6", "P2RY1", "JMJD1C", "GNAI1", "GP1BA", "MFN2", "G…
451	COAGULATION%GO%GO:0050817	2.22449e-05	0.000146343	0.57561	0.268505	2.04014	183	c("PDE5A", "PROS1", "F2RL2", "JAK2", "JAM2", "PDE1A", "DGKI", "KCNMB1", "LEFTY2", "PLAT", "TGFB2", "KCNMA1", "TGFB3", "WEE1", "COL1A2", "APOA1", "ATP1B2", "FYN", "VEGFC", "MAFK", "PIK3R1", "GATA5", "DOCK1", "KCNMB4", "PTPN11", "PDE6A", "CD47", "KCNMB2", "JAM3", "RASGRP1", "IGF1", "COL3A1", "KIF3C", "CABLES1", "PDE3B", "GUCY1A3", "ADAMTS13", "GATA6", "P2RY1", "JMJD1C", "GNAI1", "GP1BA", "MFN2", "G…
452	CELLULAR PROCESS INVOLVED IN REPRODUCTION%GO%GO:0048610	2.29849e-05	0.000150876	0.57561	0.335744	2.23572	87	c("HSPA2", "SOX8", "RPS4Y1", "REC8", "OSGIN2", "PIWIL4", "SOX9", "TSSK6", "MAEL", "DPY19L2", "INHBA", "DZIP1", "CYP26B1", "CEP57", "SPIRE1", "LRRC6", "BBS4", "MSH2", "ATM", "PLCB1", "PMS1", "FGFR2", "RPL31", "NPHP1", "RAD54L", "KIAA0430", "RPS23", "ZP3", "BBS2", "CD9", "RAD21", "NPM2", "GAS6", "RAD54B", "ADAM2", "STAG3", "USF2", "SMC3", "RPL3L", "PKDREJ", "CTNNB1", "NANOS3", "DMC1", "PRMT7", "PMS…
453	ENDOPLASMIC RETICULUM LUMEN%GO%GO:0005788	2.38303e-05	0.00015608	0.57561	0.390793	2.39651	63	c("COL14A1", "COL16A1", "COL10A1", "COL9A1", "PDGFD", "COL21A1", "ARSJ", "COL9A2", "COL13A1", "COL8A1", "COL24A1", "COL1A2", "APOA1", "LEPREL1", "COL7A1", "COL8A2", "LEPREL2", "COL3A1", "ARSD", "COL22A1", "COL4A5", "COL19A1", "ARSG", "PDGFC", "ASPH", "F10", "ARSI", "STS", "COL23A1", "FOXRED2", "ERAP1", "SUMF1", "GAS6", "COL2A1", "FMO1", "COL4A6", "COL1A1", "COL12A1", "CASQ2", "ARSB", "ACHE", "GLT…
454	TUBE DEVELOPMENT%GO%GO:0035295	2.45024e-05	0.000160129	0.57561	0.367393	2.33919	71	c("SOX4", "BMP4", "LEF1", "PAK1", "FOXS1", "TGFB3", "FGF1", "PCSK5", "SOX8", "PKD2", "FOXC2", "PRICKLE1", "FZD1", "LRP5", "SOX9", "FOXD2", "SMO", "BBS4", "PKD1", "BMPR2", "STIL", "FZD6", "SFRP2", "FGF2", "NPHP3", "FGFR2", "FZD3", "DVL2", "MEF2C", "COBL", "MESP1", "PROX1", "NFIB", "PLXNB2", "HAND2", "GATA4", "RYR2", "FOXP2", "CTNNB1", "SETDB2", "VEGFA", "ATP7A", "GATA3", "SDCCAG8")
455	REGULATION OF SYNAPTIC TRANSMISSION%GO%GO:0050804	2.46645e-05	0.000160834	0.57561	0.480166	2.44669	32	c("SNCA", "SNCAIP", "APOE", "DRD4", "CNTN4", "CHRNA3", "USP46", "SIPA1L1", "SLC30A1", "CAMK2B", "KCNMB4", "DLG4", "PLK2", "LGI1", "MEF2C", "CDK5", "SYNGAP1", "NLGN1", "NLGN3", "GIPC1")
456	INORGANIC CATION TRANSMEMBRANE TRANSPORTER ACTIVITY%GO%GO:0022890	2.4756e-05	0.000161077	0.57561	0.311922	2.17927	111	c("KCNA5", "HTR2B", "SCN2B", "KCNT2", "KCNE1", "KCNMA1", "ATP1B4", "KCNS3", "ABCC8", "SCN3B", "SCN4B", "ATP1B2", "KCNA4", "SLC40A1", "PKD2", "KCNC4", "KCNK6", "RYR3", "PKD1L1", "KCNMB4", "SLC5A7", "CACNA2D1", "TPCN1", "KCNMB2", "ATP5S", "ATP7B", "PKD1", "NNT", "SLC13A4", "SLC24A1", "SHROOM2", "KCNK17", "KCNS1", "ATP1A2", "SLC17A7", "ITPR1", "SCN3A", "LOXHD1", "CACNA1D", "CYB5A", "ATP2C1", "ZDHHC1…
457	PHOSPHORIC ESTER HYDROLASE ACTIVITY%GO%GO:0042578	2.50389e-05	0.000162532	0.57561	0.309241	2.16815	113	c("HTR2B", "PLCE1", "PDE5A", "F2RL2", "ENPP2", "EDNRA", "PDE1A", "PTPRR", "DUSP26", "CILP", "PDE1C", "PTPRN2", "PTPN3", "PTPRD", "NT5C2", "PTPN11", "PDE6A", "EPHX2", "PTPN13", "EYA1", "PDE3B", "DUSP28", "PTPN14", "CAMK2G", "PDE8B", "DUSP6", "PTPRM", "PLCB1", "DUSP27", "MTMR4", "CCL5", "PLCB4", "PTPRA", "PDE6B", "PPP2R3B", "DUSP16", "PGAP1", "MPPE1", "PPP1R3C", "DUSP8", "PSPH", "PPM1B", "NT5C1A", …
458	CHOLESTEROL HOMEOSTASIS%GO%GO:0042632	2.51439e-05	0.000162532	0.57561	0.594204	2.39603	17	c("APOE", "APOA1", "SCARB1", "EPHX2", "LRP5", "APOM", "ACSM3", "LCAT", "ABCA2", "CAV3", "SIRT1", "LDLRAP1")
459	STEROL HOMEOSTASIS%GO%GO:0055092	2.51439e-05	0.000162532	0.57561	0.594204	2.39603	17	c("APOE", "APOA1", "SCARB1", "EPHX2", "LRP5", "APOM", "ACSM3", "LCAT", "ABCA2", "CAV3", "SIRT1", "LDLRAP1")
460	OSSIFICATION%GO%GO:0001503	2.55079e-05	0.000164526	0.57561	0.43623	2.41352	43	c("SFRP1", "BMP4", "ENAM", "RUNX2", "LEF1", "FOXS1", "TGFB3", "GLI1", "COL13A1", "SOX8", "EXT1", "FOXC2", "FZD1", "LRP5", "IGF1", "SMO", "TUFT1", "FIGNL1", "FGFR2", "MEF2C", "FGFR3")
461	REGULATION OF RAS GTPASE ACTIVITY%GO%GO:0032318	2.57264e-05	0.000165575	0.57561	0.409815	2.3095	46	c("EPHA3", "SFRP1", "AGRN", "NTRK2", "RABGAP1L", "NET1", "SIPA1L1", "ALDH1A1", "EPHB3", "RALBP1", "ALS2", "NTF3", "LLGL1", "FGD5", "TSC1", "RASAL2", "TAX1BP3", "SYNGAP1", "TBC1D15", "EPHA5", "PLXNB2", "USP6NL", "FGD6", "RASGRP3", "RAB3GAP1", "ARHGAP29", "SRGAP2", "TBC1D7")
462	CARBOXYLIC ACID METABOLIC PROCESS%GO%GO:0019752	2.61099e-05	0.00016768	0.57561	0.251034	1.98256	241	c("DIO2", "GATM", "ALDH1A2", "GSTM5", "NOX4", "DDAH1", "SLC27A6", "ACADL", "ASPA", "ELOVL4", "CYP2J2", "CDO1", "RENBP", "CSAD", "LTC4S", "ALDH5A1", "PDK3", "HPGD", "ALDH4A1", "IGF1", "GSTA4", "CPT2", "CYP46A1", "DECR2", "CYP26B1", "ACOT4", "CSPG5", "GSTO2", "GHR", "HGD", "PLA2G4C", "CHST14", "BDH2", "IVD", "GAMT", "RARS2", "BCKDHA", "ABAT", "PTGR2", "MGST3", "PLA2G15", "D2HGDH", "L2HGDH", "SLC27A…
463	RESPONSE TO METAL ION%GO%GO:0010038	2.62636e-05	0.000168302	0.57561	0.441372	2.36047	39	c("HTR2B", "SNCA", "CRHBP", "KCNMA1", "BCL2", "CRIP1", "CAPN3", "RYR3", "KCNMB4", "KCNIP1", "KCNMB2", "ATP7B", "SEC31A", "MEF2C", "ASPH", "D2HGDH", "CDKN1B", "HAAO", "ZACN", "NEDD4L", "GPLD1", "TRPC1", "HOMER1", "MEF2A", "RYR2")
464	MACROMOLECULAR COMPLEX SUBUNIT ORGANIZATION%GO%GO:0043933	2.63892e-05	0.000168743	0.57561	0.226562	1.84992	319	c("FMOD", "CENPA", "JAK2", "DPYSL3", "NDC80", "APOE", "TCF4", "HIST1H2AC", "FSCN1", "CHRNA3", "MYH11", "COLEC12", "APOA1", "MAP4", "KIF13A", "RPS4Y1", "CAPN3", "SCARB1", "RYR3", "EVL", "LIMA1", "DLG4", "PLK2", "ALDH5A1", "APOM", "SOX9", "SHANK1", "FGF13", "GSN", "ATPIF1", "MDM4", "HMGB2", "BICD1", "HLA-DRB1", "HIST1H2BC", "HIST1H2BG", "CBR4", "BBS10", "PSIP1", "TPR", "PILRB", "STMN1", "SPIRE1", "…
465	TRANSCRIPTION REGULATORY REGION DNA BINDING%GO%GO:0044212	2.67364e-05	0.000170596	0.57561	0.310837	2.17169	111	c("SOX4", "ESR1", "TCF4", "LEF1", "GLI1", "ZEB1", "DBP", "SOX8", "GATA5", "FOXC2", "MYOCD", "SOX9", "SOX7", "LMO2", "HMGB2", "SMARCA2", "GATA6", "GABPA", "TCF7L2", "TBL1XR1", "THRA", "ELK3", "HDAC5", "HDAC4", "PRDM5", "TP73", "AR", "MEF2C", "TAF1", "KLF11", "CDK5RAP2", "E2F8", "BRCA1", "MLL", "EP300", "TCF12", "MESP1", "PROX1", "SMAD7", "TFEB", "HHEX", "BCOR", "CLOCK", "ARRB1", "BRD7", "ESRRB", "…
466	REGULATION OF LIPID METABOLIC PROCESS%GO%GO:0019216	2.75776e-05	0.000175585	0.57561	0.362086	2.32164	73	c("KIT", "PIK3IP1", "APOE", "ACADL", "FGF1", "APOA1", "PIK3R1", "SCARB1", "EPHX2", "PDK3", "APOD", "CPT2", "PDE3B", "BMP6", "CPT1B", "BBS4", "PRKAA2", "FGF2", "FGFR3", "SORBS1", "SLC27A1", "BRCA1", "PPARGC1A", "SIRT1", "LDLRAP1", "PRKAB2", "APOC1", "PROX1", "SLC25A20", "ZP3", "DKK3", "GPLD1", "REST", "SCP2", "STK11", "MLYCD", "SAMD8", "FBXW7", "AKT1", "EDF1", "PNPLA2", "RBL2", "TWIST1", "RBL1", "…
467	NEGATIVE REGULATION OF DEVELOPMENTAL PROCESS%GO%GO:0051093	2.76721e-05	0.000175809	0.57561	0.286155	2.0773	141	c("THBS4", "FRZB", "KIT", "SULF1", "THY1", "SFRP1", "BMP4", "THBS2", "CNTN4", "SOX15", "SOX8", "KANK1", "SERPINF1", "PRICKLE1", "NPPB", "MYOCD", "MAP2K5", "LRP5", "SOX9", "FGF13", "FZD7", "WNT9A", "INHBA", "AMOT", "IGF1", "PDE3B", "PTHLH", "DDIT3", "OMA1", "THBS3", "PTPRM", "SFRP2", "JAG1", "HDAC5", "HDAC4", "RTN4R", "HIST1H4H", "NPHP3", "ID2", "TBX3", "FGFR3", "SIRT1", "HIST1H4E", "ZKSCAN3", "ME…
468	LEADING EDGE MEMBRANE%GO%GO:0031256	2.78893e-05	0.000176811	0.57561	0.499688	2.40343	27	c("SFRP4", "FRZB", "FZD2", "ANTXR1", "KANK1", "FZD1", "SPTBN1", "FZD7", "IFIT5", "SH3YL1", "FZD6", "MACF1", "FZD3", "PACSIN1", "ARHGEF2", "APC", "SYNE2")
469	MICROTUBULE ORGANIZING CENTER%GO%GO:0005815	2.81209e-05	0.000177899	0.57561	0.265196	2.01677	185	c("EVC", "HSD17B14", "BRSK1", "TTC8", "PKD2", "KIF13A", "CKAP2", "TCEA2", "DYNC1LI2", "RAB11FIP3", "PLK2", "DYNC2LI1", "LRRCC1", "AK5", "DZIP1", "PLK3", "NIN", "CETN3", "FBXO40", "RABGAP1", "DYNLL1", "ALS2", "CEP68", "CEP57", "GNAI1", "CNTROB", "BBS4", "KIF20B", "CEP290", "STIL", "PLEKHA7", "KIAA0753", "DCTN1", "FGFR1OP", "CEP350", "ABCA2", "ODF2L", "FBXW11", "CDKL2", "ALMS1", "PIBF1", "CDK5RAP2"…
470	GLYCOSAMINOGLYCAN METABOLIC PROCESS%GO%GO:0030203	2.81867e-05	0.000177936	0.57561	0.388958	2.3489	58	c("FMOD", "OGN", "LUM", "OMD", "AGRN", "CHST6", "CHSY3", "PRELP", "GPC6", "B3GNT2", "EXT1", "HAS3", "ST3GAL3", "SDC2", "CSPG5", "HEXB", "IDS", "CHST14", "GLCE", "FGF2", "HS2ST1", "ST3GAL6", "HEXA", "FUCA1", "GPC1", "IDUA", "HSPG2")
471	TRANSMEMBRANE TRANSPORT%GO%GO:0055085	2.83439e-05	0.000178549	0.57561	0.248261	1.94816	228	c("KCNA5", "HTR2B", "SLC26A4", "SLC30A2", "ABCG2", "SCN2B", "SLC1A7", "SLC6A1", "SLC44A5", "KCNT2", "KCNE1", "HEPH", "KCNMA1", "SLC27A6", "GLRB", "GABRB1", "ABCC8", "CYBRD1", "SCN3B", "SCN4B", "ATP6V1G2", "APOA1", "ATP1B2", "SLC47A1", "SLC40A1", "PKD2", "SLC9A5", "MYO5B", "SLC30A1", "SCARB1", "RYR3", "SLC5A7", "SLC16A7", "SLC44A1", "SLC4A8", "CPT2", "SLC2A10", "SLC35A1", "SLC22A18", "TPR", "SLC6A…
472	POSITIVE REGULATION OF KINASE ACTIVITY%GO%GO:0033674	2.91674e-05	0.000183347	0.57561	0.302938	2.16611	129	c("HTR2B", "PLCE1", "KIT", "SNCA", "CCND1", "JAK2", "BMP4", "MDFIC", "DRD4", "PAK1", "TGFB2", "CHRNA3", "CCND2", "TPD52L1", "PKD2", "KDELR3", "CXCR4", "MAP2K5", "TNIK", "FGF13", "GFPT1", "EDN3", "KIDINS220", "PILRB", "DDIT3", "GHR", "ALS2", "NTF3", "SEC31A", "PKD1", "ADCY2", "ADORA2B", "FGF2", "DOK7", "DCTN1", "DVL2", "MAP3K1", "UBB", "DVL3", "FGFR3", "WIPI1", "SIRT1", "DDR2", "AFAP1L2", "S1PR2",…
473	SKELETAL SYSTEM MORPHOGENESIS%GO%GO:0048705	2.96471e-05	0.000185968	0.57561	0.484211	2.40821	30	c("FREM1", "BMP4", "EVC", "FOXS1", "COL13A1", "RAB23", "FOXC2", "LRP5", "SOX9", "WNT9A", "IRX5", "CYP26B1", "SMO", "FGFR2", "MEF2C", "FGFR3", "DDR2")
474	CELLULAR MACROMOLECULE CATABOLIC PROCESS%GO%GO:0044265	3.05889e-05	0.000191471	0.557332	0.252303	1.97511	223	c("SFRP1", "SPATA18", "HERC5", "TPD52L1", "ENC1", "HECW2", "UBE2H", "RPS4Y1", "XPC", "HERC6", "FBXL14", "RNF103", "RNF217", "GZMA", "BTRC", "ATXN3", "HMGB2", "DDIT3", "HECTD2", "FBXO8", "RNF20", "OMA1", "SIAH2", "FBXO4", "FBXO31", "TBL1XR1", "RNF146", "RNASEH2B", "ATM", "CRBN", "EXOSC7", "WWP2", "ERCC5", "ANAPC10", "SETMAR", "FBXW11", "UBB", "SKP2", "MAD2L1", "DCP2", "GPC1", "RPL31", "FBXO21", "U…
475	ION CHANNEL BINDING%GO%GO:0044325	3.06571e-05	0.000191494	0.557332	0.495512	2.43768	29	c("ABCC8", "SCN3B", "SCN4B", "PKD2", "PACS1", "FGF13", "PKD1", "FHL1", "ACTN2", "ID2", "CAV3", "ASPH", "PKP2", "TRPC1", "LRRK2", "HOMER1", "RYR2", "CTNNB1", "TRAPPC2", "GOPC", "SRI", "SLC8A1")
476	REGULATION OF MUSCLE SYSTEM PROCESS%GO%GO:0090257	3.1412e-05	0.000195797	0.557332	0.400512	2.33882	52	c("TNNT1", "KCNA5", "PLCE1", "TNNT3", "SCN2B", "CHRNA3", "SCN3B", "SCN4B", "TPM3", "CAMK2B", "MYOCD", "MYL5", "IGF1", "CAMK2G", "HDAC4", "DAPK3", "CAV3", "ASPH", "ATP1A2", "TNNI1", "F2R", "CAMK2D", "TNNC2", "SMAD7", "MYL9", "PKP2", "DMD", "PIK3CG", "GJA1", "PRKCA", "RYR2", "SRI", "SLC8A1", "CASQ2", "PLN", "DSC2", "TNNC1", "GSTM2")
477	NEGATIVE REGULATION OF WNT RECEPTOR SIGNALING PATHWAY%GO%GO:0030178	3.26086e-05	0.000202598	0.557332	0.400374	2.33801	52	c("SFRP4", "FRZB", "SFRP1", "DKK2", "LEF1", "GLI1", "DACT3", "PRICKLE1", "FZD1", "SOX9", "CXXC4", "GRB10", "DDIT3", "SIAH2", "TCF7L2", "DACT1", "FZD6", "SFRP2", "CBY1", "NPHP3", "TAX1BP3", "MDFI", "MED12", "PPP2R3A", "APC", "MESP1", "NKD1", "DKK3")
478	DEVELOPMENTAL GROWTH INVOLVED IN MORPHOGENESIS%GO%GO:0060560	3.26397e-05	0.000202598	0.557332	0.557859	2.38376	20	c("BMP4", "EVC", "FGF1", "SOX9", "FOXD2", "SMO", "FGFR2", "CDK5", "FGFR3", "DDR2", "COBL", "MESP1", "APP", "NLGN3", "MAGI2")
479	REGULATION OF DEVELOPMENTAL GROWTH%GO%GO:0048638	3.38107e-05	0.000209429	0.557332	0.493111	2.42587	29	c("BMP4", "APOE", "AGRN", "SOX15", "CAPN3", "FGF13", "DUSP6", "PLCB1", "FGF2", "ISLR2", "FGFR2", "MEF2C", "FGFR3", "MAPT", "PPP2R3A", "PROX1", "ZP3", "NKD1", "NACA", "TWF2")
480	CELL DIVISION%GO%GO:0051301	3.39136e-05	0.000209628	0.557332	0.401129	2.29566	48	c("LEF1", "TGFB2", "MYH10", "MAP4", "KLHL13", "KIF13A", "CKAP2", "SPTBN1", "RAB11FIP3", "NUSAP1", "FGF13", "PLK3", "SPIRE1", "GNAI1", "CNTROB", "BBS4", "DAPK3", "FGFR2", "PRC1", "CLASP1", "KIF23", "APC", "PIK3C3", "NEK7", "KLHL22", "ZFYVE26", "BECN1", "KLHL21", "CHMP1A", "ARHGEF11", "RASA1", "RGS14", "STAMBP", "ARL3", "AURKC")
481	CELLULAR ION HOMEOSTASIS%GO%GO:0006873	3.69472e-05	0.000227905	0.557332	0.282798	2.08573	153	c("KCNA5", "HTR2B", "PLCE1", "MBP", "ABCG2", "EDNRA", "SCN2B", "DRD4", "KCNE1", "HEPH", "KCNMA1", "CHRNA3", "CYBRD1", "SCN3B", "SCN4B", "ATP6V1G2", "CYSLTR1", "CDH23", "BCL2", "SLC40A1", "PKD2", "SLC30A1", "CXCR4", "KCNMB4", "PDE6A", "DLG4", "EPHX2", "SHANK1", "KCNMB2", "TNNI3", "CACNA1B", "P2RY1", "ATP7B", "CSRP3", "CCL5", "PDE6B", "FGF2", "WWP2", "KIF5B", "RGN", "ACTN2", "NLGN4X", "CAV3", "GPC1…
482	GLYCEROLIPID BIOSYNTHETIC PROCESS%GO%GO:0045017	3.74743e-05	0.000230427	0.557332	0.349184	2.24496	74	c("HTR2B", "PLCE1", "SLC44A5", "ELOVL4", "APOA1", "INPP4B", "PIK3R1", "SLC44A1", "AGPAT4", "PIK3C2B", "MBOAT2", "PLA2G4C", "AGPAT9", "PIP4K2B", "ATM", "MTMR4", "FGF2", "LCAT", "PGAP1", "PIGK", "MPPE1", "PIGM", "SLC27A1", "PIGZ", "PIGP", "DPM3", "DPM1", "PIK3R2", "SYNJ2", "CDS2", "MTMR14", "PIK3C3", "CHKB", "PIK3CG", "GPAM", "PIGV", "AGPAT1", "MTMR3", "SLC44A2", "AGPAT2", "MTM1", "PNPLA2", "PHOSPH…
483	RESPONSE TO NITROGEN COMPOUND%GO%GO:1901698	3.75113e-05	0.000230427	0.557332	0.281745	2.06248	146	c("SNCA", "SOCS2", "IGFBP5", "SFRP1", "JAK2", "CRHBP", "DRD4", "GNB3", "HDAC9", "APLP1", "IFIT1", "CHRNA3", "FOXS1", "FGF1", "FGF18", "ATP6V1G2", "BCL2", "PIK3R1", "FOXC2", "RYR3", "PTPN11", "GNG11", "SOX9", "SORT1", "GRB10", "UBR1", "GAB1", "PDE3B", "GHR", "GNAI1", "GNG2", "PRKAA2", "ADCY2", "TSC1", "FGF2", "NLRP1", "HDAC5", "FGFR2", "ABAT", "MEF2C", "ASPH", "FGFR3", "CISH", "SORBS1", "FGF9", "B…
484	REGULATION OF HOMEOSTATIC PROCESS%GO%GO:0032844	3.7743e-05	0.000231371	0.557332	0.338228	2.22457	83	c("KCNA5", "HTR2B", "SNCA", "THY1", "SLC30A2", "SCN2B", "SGIP1", "SCN3B", "SCN4B", "BCL2", "MLLT11", "PKD2", "CAPN3", "PIF1", "NPPB", "LRP5", "INHBA", "HMGB2", "HLA-DRB1", "PRKAA2", "FGF2", "FHL1", "CAV3", "ASPH", "PTGER3", "ACOX1", "PPARGC1A", "ITPR1", "CACNA1D", "P2RX7", "HES5", "F2R", "TERF1", "CAMK2D", "SMAD7", "EPHA5", "TNKS", "GPLD1", "TRPC1", "DMD", "TERF2IP", "IBTK", "BBC3", "RYR2")
485	TRANSMEMBRANE TRANSPORTER ACTIVITY%GO%GO:0022857	3.84849e-05	0.000235183	0.557332	0.253468	1.96138	210	c("KCNA5", "GRIA3", "HTR2B", "SLC26A4", "ABCG2", "SCN2B", "SLC1A7", "KCNT2", "KCNE1", "KCNMA1", "ATP1B4", "CHRNA3", "SLC16A4", "GLRB", "KCNS3", "ABCC8", "SCN3B", "SCN4B", "BCL2", "ATP1B2", "KCNA4", "SLC40A1", "PKD2", "KCNC4", "KCNK6", "RYR3", "PKD1L1", "KCNMB4", "SLC5A7", "CACNA2D1", "SLC16A7", "SLC44A1", "TPCN1", "SLC16A5", "KCNMB2", "GRIA1", "ATP5S", "SLC2A10", "SLC35A1", "TRPM4", "SLC22A18", "…
486	HEMOSTASIS%REACTOME%REACT_604.4	3.85234e-05	0.000235183	0.557332	0.257179	1.96904	190	c("PDE5A", "PROS1", "F2RL2", "JAK2", "JAM2", "PDE1A", "DGKI", "KCNMB1", "LEFTY2", "PLAT", "TGFB2", "KCNMA1", "GNB3", "TGFB3", "WEE1", "APOA1", "ATP1B2", "FYN", "VEGFC", "MAFK", "PIK3R1", "GATA5", "DOCK1", "KCNMB4", "PTPN11", "PDE6A", "CD47", "GNG11", "KCNMB2", "JAM3", "RASGRP1", "IGF1", "KIF3C", "CABLES1", "PDE3B", "GUCY1A3", "GATA6", "P2RY1", "JMJD1C", "GNAI1", "GP1BA", "PPP2R1B", "MFN2", "GNG2"…
487	REGULATION OF CELLULAR RESPONSE TO GROWTH FACTOR STIMULUS%GO%GO:0090287	3.96616e-05	0.000241635	0.557332	0.387332	2.29233	55	c("SULF1", "LTBP4", "ADAMTSL2", "SULF2", "PPP1R15A", "DAND5", "BAMBI", "GRB10", "TRIM33", "CDKN2B", "HTRA3", "DUSP6", "VTN", "MTMR4", "MYO1C", "FGFR2", "CAV3", "UBB", "GPC1", "SIRT1", "BCL9", "NEDD4L", "SMAD7", "HHEX", "GIPC1", "DMD", "PPP1CB", "ASPN", "STK11", "FGFBP3", "CTNNB1", "SMAD6", "UBC", "VEGFA", "GATA3", "VEGFB", "LTBP1", "SLIT2", "PIN1", "DAB2IP")
488	DEVELOPMENTAL BIOLOGY%REACTOME%REACT_111045.1	3.97676e-05	0.000241784	0.557332	0.268936	2.02335	175	c("ST8SIA2", "COL9A1", "SCN2B", "JAK2", "DPYSL3", "AGRN", "TCF4", "LEFTY2", "ENAH", "PAK1", "HFE2", "COL9A2", "SH3GL2", "MYH11", "SCN3B", "ST8SIA4", "MYH10", "FYN", "UNC5B", "DOCK1", "PTPN11", "EVL", "MAPK12", "SPTBN1", "MYO10", "DLG4", "SEMA6A", "ARHGEF12", "ANK1", "KLF5", "SEMA5A", "SPTAN1", "NRP1", "SIAH2", "NTN4", "ROBO1", "COL4A5", "SEMA6D", "MED30", "TBL1XR1", "DPYSL4", "PTPRA", "ITGA9", "R…
489	MORPHOGENESIS OF A BRANCHING STRUCTURE%GO%GO:0001763	4.00402e-05	0.000242943	0.557332	0.472302	2.36373	31	c("BMP4", "LEF1", "PAK1", "FOXS1", "FGF1", "COL13A1", "SOX8", "PKD2", "FOXC2", "LRP5", "SOX9", "FOXD2", "PKD1", "SFRP2", "FGF2", "FGFR2")
490	SUBSTRATE-SPECIFIC TRANSPORTER ACTIVITY%GO%GO:0022892	4.12527e-05	0.000249789	0.557332	0.250607	1.9531	216	c("KCNA5", "GRIA3", "HTR2B", "SLC26A4", "SCN2B", "SLC1A7", "APOE", "KCNT2", "KCNE1", "KCNMA1", "ATP1B4", "CHRNA3", "SLC16A4", "GLRB", "KCNS3", "ABCC8", "SCN3B", "SCN4B", "APOA1", "ATP1B2", "KCNA4", "SLC40A1", "PKD2", "KCNC4", "KCNK6", "RYR3", "PKD1L1", "KCNMB4", "SLC5A7", "CACNA2D1", "SLC16A7", "SLC44A1", "APOM", "TPCN1", "SLC16A5", "KCNMB2", "GRIA1", "APOD", "RAMP2", "COL4A3BP", "ATP5S", "SLC2A1…
491	REGULATION OF CYTOSKELETON ORGANIZATION%GO%GO:0051493	4.16059e-05	0.000251415	0.557332	0.331216	2.20557	87	c("SNCA", "PLEKHH2", "EPHA3", "SFRP1", "PAK1", "NES", "KANK1", "CLIP3", "LIMA1", "PLK2", "FGF13", "GSN", "AMOT", "RICTOR", "TPR", "NTF3", "NEXN", "NEB", "PTGER4", "TSC1", "DAPK3", "CAV3", "CDK5", "ALMS1", "CDK5RAP2", "CLASP1", "BRCA1", "MAPT", "ARHGEF2", "TMEM67", "SYNPO", "P2RX7", "APC", "PROX1", "PARK2", "TERF1", "ROCK1", "EPHA5", "JMY", "PDXP", "PPM1E", "TAOK1", "FHOD1", "TWF2", "SENP6")
492	POTASSIUM ION TRANSPORT%GO%GO:0006813	4.19318e-05	0.000252869	0.557332	0.471399	2.35921	31	c("KCNA5", "KCNT2", "KCNMB1", "KCNE1", "KCNMA1", "KCNS3", "ABCC8", "KCNAB1", "KCNA4", "KCNC4", "KCNK6", "KCNMB4", "KCNMB2", "KCNK17", "KCNS1", "ATP1A2")
493	BLOOD VESSEL DEVELOPMENT%GO%GO:0001568	4.2885e-05	0.000258093	0.557332	0.328616	2.21407	93	c("SOX4", "THY1", "BMP4", "LEF1", "TGFB2", "FOXS1", "SCG2", "ESM1", "COL1A2", "PLXDC1", "PKD2", "MCAM", "FOXC2", "LRP5", "HPGD", "GPR124", "TNNI3", "ATPIF1", "JAM3", "APOD", "EPHB3", "RAMP2", "SMO", "GATA6", "TCF7L2", "ROBO1", "PKD1", "BMPR2", "FZD6", "SFRP2", "EFNB2", "JAG1", "FGF2", "FGFR2", "MEF2C", "E2F8", "SIRT1")
494	CANONICAL WNT RECEPTOR SIGNALING PATHWAY%GO%GO:0060070	4.32418e-05	0.000259713	0.557332	0.491658	2.3648	27	c("FZD2", "SOX4", "SFRP1", "LEF1", "FZD1", "LRP5", "FZD7", "WNT9A", "SMO", "NDP", "TCF7L2", "TBL1XR1", "FZD3", "DVL2", "DVL3")
495	EGFR1%IOB%EGFR1	4.36285e-05	0.000261506	0.557332	0.266528	2.01216	179	c("PLCE1", "KIT", "SNCA", "ANTXR1", "JAK2", "PHLDB2", "PTPRR", "PAK1", "SH3GL2", "DYRK1B", "CRIM1", "BCL2", "FYN", "PIK3R1", "PLEKHA6", "DOCK1", "ANXA4", "PTPN11", "MCF2", "MAP2K5", "GAB2", "GSN", "PIK3C2B", "SDPR", "TNIP1", "EPHB3", "GRB10", "SHB", "GAB1", "TRIM29", "CALD1", "AHNAK", "RALBP1", "DYNLL1", "SIAH2", "ARHGEF4", "EFNB2", "PRKAA2", "STAM", "PTPRA", "PRKD1", "KIAA1217", "MAP3K1", "TOLLI…
496	METAL ION TRANSMEMBRANE TRANSPORTER ACTIVITY%GO%GO:0046873	4.38565e-05	0.000262146	0.557332	0.321701	2.18901	98	c("KCNA5", "HTR2B", "SCN2B", "KCNT2", "KCNE1", "KCNMA1", "KCNS3", "ABCC8", "SCN3B", "SCN4B", "ATP1B2", "KCNA4", "SLC40A1", "PKD2", "KCNC4", "KCNK6", "RYR3", "PKD1L1", "KCNMB4", "SLC5A7", "CACNA2D1", "TPCN1", "KCNMB2", "ATP7B", "PKD1", "SLC13A4", "SLC24A1", "SHROOM2", "KCNK17", "KCNS1", "ATP1A2", "SLC17A7", "ITPR1", "SCN3A", "LOXHD1", "CACNA1D", "ATP2C1", "ZDHHC17", "ZP3", "GAS6", "SLC4A4", "TRPC1…
497	WNT RECEPTOR SIGNALING PATHWAY%GO%GO:0016055	4.39119e-05	0.000262146	0.557332	0.438167	2.3244	38	c("FZD2", "SOX4", "SFRP1", "LEF1", "DIXDC1", "FZD1", "LRP5", "WNT2B", "FZD7", "WNT9A", "SMO", "NDP", "TCF7L2", "TBL1XR1", "FZD6", "KLHL12", "FZD3", "DVL2", "DVL3", "PPP2R3A", "APC")
498	SIGNALING BY NGF%REACTOME%REACT_11061.7	4.46387e-05	0.00026595	0.557332	0.310628	2.16335	109	c("KIT", "JAK2", "PDE1A", "HBEGF", "NTRK2", "SH3GL2", "FGF1", "FGF18", "PCSK5", "FYN", "PDE1C", "NET1", "PIK3R1", "TIAM2", "ARHGEF3", "PTPN11", "MCF2", "MAPK12", "MAP2K5", "RICTOR", "GAB1", "ARHGEF12", "KIDINS220", "ARHGEF4", "PPP2R1B", "BCL2L11", "DUSP6", "KALRN", "AKAP13", "ARHGEF9", "ADCY2", "FGF2", "NRG2", "MEF2C", "UBB", "OBSCN", "FGF9", "CDKN1B", "SOS2", "ITPR1", "ARHGEF6", "TNRC6A", "ARHGE…
499	EXTRACELLULAR MATRIX STRUCTURAL CONSTITUENT%GO%GO:0005201	4.84649e-05	0.000287983	0.557332	0.43128	2.30649	39	c("COMP", "COL14A1", "LUM", "COL9A1", "ENAM", "COL9A2", "COL13A1", "COL1A2", "FBLN2", "COL8A2", "KAL1", "LAMA4", "WNT9A", "COL3A1", "TUFT1", "EFEMP2", "COL19A1")
500	AMINOGLYCAN BIOSYNTHETIC PROCESS%GO%GO:0006023	4.86832e-05	0.000287983	0.557332	0.402192	2.26654	46	c("FMOD", "OGN", "LUM", "OMD", "AGRN", "CHST6", "CHSY3", "PRELP", "GPC6", "B3GNT2", "EXT1", "HAS3", "ST3GAL3", "SDC2", "CSPG5", "CHST14", "GLCE", "B3GNT8", "HS2ST1", "ST3GAL6", "GPC1", "HSPG2")
501	SYNAPSE%GO%GO:0045202	4.88159e-05	0.000287983	0.557332	0.367311	2.28652	66	c("SERPINE2", "MME", "SNCAIP", "AGRN", "AMPH", "CHRNA3", "BRSK1", "APBB2", "SIPA1L1", "DLG4", "SHANK1", "GRIA1", "P2RY1", "SARM1", "TMEM163", "NLGN4X", "FGFR2", "FZD3", "CAV3", "CDK5", "ERC1", "SLC17A7", "PACSIN1", "NLGN1", "MAGEE1", "APP", "F2R", "NLGN3", "GIPC1", "MAGI2", "TPRG1L", "SRGAP2", "SVOP", "TG", "CTNNB1", "PDLIM5", "TRPV1", "ERC2", "ACHE", "RGS14", "AAK1", "CACNG8", "DNM3", "CDK5R1", …
502	Leukocyte transendothelial migration%KEGG%hsa04670	4.88947e-05	0.000287983	0.557332	0.43492	2.30718	38	c("THY1", "JAM2", "MYL7", "PIK3R1", "CXCR4", "PTPN11", "MYL5", "MAPK12", "JAM3", "VCAM1", "GNAI1", "CLDN9", "CLDN11", "ACTN2", "CTNNA3", "CLDN1", "PIK3R2", "VCL", "ROCK1", "MYL9", "RAP1A", "PIK3CG", "PRKCA", "CTNNB1")
503	NEGATIVE REGULATION OF CELL MOTILITY%GO%GO:2000146	4.89193e-05	0.000287983	0.557332	0.397697	2.27602	48	c("SULF1", "THY1", "IGFBP5", "SFRP1", "DPYSL3", "PODN", "APOE", "IGFBP3", "KANK1", "MAP2K5", "TP53INP1", "APOD", "RNF20", "PTGER4", "PTPRM", "PLCB1", "SFRP2", "FGF2", "HDAC5", "SMAD7", "VCL", "SP100", "PKP2", "MAGI2", "SRGAP2", "KRIT1", "NBL1")
504	NEGATIVE REGULATION OF CELLULAR COMPONENT MOVEMENT%GO%GO:0051271	4.89193e-05	0.000287983	0.557332	0.397697	2.27602	48	c("SULF1", "THY1", "IGFBP5", "SFRP1", "DPYSL3", "PODN", "APOE", "IGFBP3", "KANK1", "MAP2K5", "TP53INP1", "APOD", "RNF20", "PTGER4", "PTPRM", "PLCB1", "SFRP2", "FGF2", "HDAC5", "SMAD7", "VCL", "SP100", "PKP2", "MAGI2", "SRGAP2", "KRIT1", "NBL1")
505	PROTEIN MODIFICATION BY SMALL PROTEIN CONJUGATION OR REMOVAL%GO%GO:0070647	4.92086e-05	0.000289112	0.557332	0.261043	1.98344	183	c("UCHL1", "HERC5", "USP46", "ENC1", "BCL2", "MYLIP", "HECW2", "UBE2H", "KLHL13", "ASB9", "USP9Y", "HERC6", "FBXL14", "RNF103", "RNF217", "EYA1", "BTRC", "ATXN3", "UBE2Q2", "KLHL7", "TRIM33", "TRPM4", "LMO7", "HECTD2", "RNF20", "FBXO4", "SUPT3H", "RNF146", "WDR48", "CRBN", "USP11", "WWP2", "KLHL12", "FANCL", "ANAPC10", "FBXW11", "UBB", "FBXO21", "UBE2D1", "PIAS2", "BRCA1", "SIRT1", "NFE2L2", "NSM…
506	CILIUM ASSEMBLY%GO%GO:0042384	5.20915e-05	0.000304843	0.557332	0.49265	2.39321	28	c("CC2D2A", "TTC8", "INTU", "TTC26", "DZIP1", "BBS10", "BBS1", "LRRC6", "BBS4", "SPAG16", "TMEM107", "CEP290", "TTLL3", "TMEM67", "STK36", "MKS1", "BBS2", "IFT172", "WDR35", "NEK1")
507	CILIUM ORGANIZATION%GO%GO:0044782	5.20915e-05	0.000304843	0.557332	0.49265	2.39321	28	c("CC2D2A", "TTC8", "INTU", "TTC26", "DZIP1", "BBS10", "BBS1", "LRRC6", "BBS4", "SPAG16", "TMEM107", "CEP290", "TTLL3", "TMEM67", "STK36", "MKS1", "BBS2", "IFT172", "WDR35", "NEK1")
508	REGULATION OF VASCULATURE DEVELOPMENT%GO%GO:1901342	5.31849e-05	0.000310629	0.557332	0.380033	2.33053	63	c("THBS4", "SULF1", "SFRP1", "BMP4", "THBS2", "HDAC9", "FGF1", "FOXC2", "SERPINF1", "NPPB", "MYOCD", "MAP2K5", "GPR124", "AMOT", "RAMP2", "PDE3B", "GATA6", "THBS3", "PTPRM", "SFRP2", "PRKD1", "FGF2", "HDAC5", "RRAS", "TSPAN12", "TNFSF12", "ROCK1", "SP100", "HHEX", "KRIT1", "HIF1AN", "PRKCA", "GATA4", "FOXO4", "CTNNB1", "AGGF1", "VEGFA", "NF1", "TWIST1", "VEGFB")
509	MALE GONAD DEVELOPMENT%GO%GO:0008584	5.34582e-05	0.000311612	0.557332	0.559826	2.35869	19	c("KIT", "SOX15", "SOX8", "WNT2B", "SOX9", "INHBA", "MAMLD1", "GATA6", "LRRC6", "MSH2", "LHCGR", "FGF9", "KITLG", "CSDE1", "GATA4")
510	CELL BODY%GO%GO:0044297	5.41175e-05	0.000314083	0.557332	0.46281	2.36842	33	c("DPYSL3", "SNCAIP", "APOE", "CRHBP", "TGFB2", "CHRNA3", "DIXDC1", "EFHC1", "GRIA1", "APOD", "SMO", "NCDN", "P2RY1", "FZD3", "CDK5", "SLC38A7", "COBL", "SRR", "EPHA5", "LRRK2", "FRMD7")
511	HYDROLASE ACTIVITY, ACTING ON ESTER BONDS%GO%GO:0016788	5.42157e-05	0.000314083	0.557332	0.255725	1.97621	208	c("HTR2B", "PLCE1", "PDE5A", "F2RL2", "SULF1", "ENPP2", "EDNRA", "UCHL1", "PDE1A", "ARSJ", "PTPRR", "DUSP26", "LYPLAL1", "USP46", "CILP", "RNASEL", "PDE1C", "DNASE1L3", "PTPRN2", "PTPN3", "PTPRD", "NT5C2", "SULF2", "PTPN11", "PDE6A", "EPHX2", "PTPN13", "EYA1", "ATXN3", "ARSD", "PDE3B", "DUSP28", "PTPN14", "ACOT4", "PLA2G4C", "CAMK2G", "IDS", "PDE8B", "DUSP6", "PTPRM", "PLCB1", "DUSP27", "MTMR4", …
512	REGULATORY REGION DNA BINDING%GO%GO:0000975	5.43055e-05	0.000314083	0.557332	0.305665	2.13801	112	c("SOX4", "ESR1", "TCF4", "LEF1", "GLI1", "ZEB1", "DBP", "SOX8", "GATA5", "FOXC2", "MYOCD", "SOX9", "SOX7", "LMO2", "HMGB2", "SMARCA2", "GATA6", "GABPA", "TCF7L2", "TBL1XR1", "THRA", "ELK3", "HDAC5", "HDAC4", "PRDM5", "TP73", "AR", "MEF2C", "TAF1", "KLF11", "CDK5RAP2", "E2F8", "BRCA1", "MLL", "EP300", "TCF12", "MESP1", "PROX1", "SMAD7", "TFEB", "HHEX", "BCOR", "CLOCK", "ARRB1", "BRD7", "ESRRB", "…
513	REGULATORY REGION NUCLEIC ACID BINDING%GO%GO:0001067	5.43055e-05	0.000314083	0.557332	0.305665	2.13801	112	c("SOX4", "ESR1", "TCF4", "LEF1", "GLI1", "ZEB1", "DBP", "SOX8", "GATA5", "FOXC2", "MYOCD", "SOX9", "SOX7", "LMO2", "HMGB2", "SMARCA2", "GATA6", "GABPA", "TCF7L2", "TBL1XR1", "THRA", "ELK3", "HDAC5", "HDAC4", "PRDM5", "TP73", "AR", "MEF2C", "TAF1", "KLF11", "CDK5RAP2", "E2F8", "BRCA1", "MLL", "EP300", "TCF12", "MESP1", "PROX1", "SMAD7", "TFEB", "HHEX", "BCOR", "CLOCK", "ARRB1", "BRD7", "ESRRB", "…
514	KIDNEY DEVELOPMENT%GO%GO:0001822	5.61821e-05	0.000324304	0.557332	0.389264	2.24295	50	c("PLCE1", "PROM1", "MME", "SOX4", "SULF1", "BMP4", "FOXS1", "FGF1", "ACE", "PCSK5", "SOX8", "PKD2", "FOXC2", "SULF2", "DACT2", "SOX9", "SMO", "PKD1", "CEP290", "NPHP3", "MEF2C")
515	SINGLE ORGANISM REPRODUCTIVE PROCESS%GO%GO:0044702	5.65801e-05	0.000325967	0.557332	0.303194	2.11829	111	c("SFRP4", "KIT", "SFRP1", "TGFB2", "TGFB3", "TRO", "PCSK5", "SOX8", "REC8", "OSGIN2", "USP9Y", "DNALI1", "PIWIL4", "SOX9", "SHANK1", "TSSK6", "HPGD", "ADC", "MAEL", "DPY19L2", "INHBA", "DZIP1", "CYP26B1", "SMO", "DYNLL1", "CEP57", "BBS4", "TCFL5", "PLCB1", "ADAM21", "MYCBPAP", "NLGN4X", "PNMA1", "RPL39L", "TDRD6", "GDF9", "BCL2L2", "SPAG4", "NPHP1", "APP", "KIAA0430", "ZP3", "CCNI", "BBS2", "CD9…
516	DNA METABOLIC PROCESS%GO%GO:0006259	5.69678e-05	0.000327565	0.557332	0.234766	1.86648	250	c("CENPA", "SFRP1", "HIST1H2AC", "GADD45A", "TPD52L1", "RAD51AP1", "APOBEC3G", "DNASE1L3", "ZSCAN4", "REC8", "MCM2", "APOBEC3F", "XPC", "PIWIL4", "NUSAP1", "RECQL", "SOX9", "TSSK6", "EYA1", "ING4", "MAEL", "ATXN3", "HMGB2", "IGF1", "HIST1H2BC", "CRY2", "NCAPD3", "HIST1H2BG", "GINS2", "DNMT3B", "FBXO4", "TCF7L2", "MSH2", "PURA", "NCAPD2", "ATM", "H1FX", "BAZ1B", "MCM4", "DUT", "ERCC5", "PMS1", "HI…
517	SUBSTRATE-SPECIFIC TRANSMEMBRANE TRANSPORTER ACTIVITY%GO%GO:0022891	5.82121e-05	0.000334072	0.557332	0.26027	1.98799	189	c("KCNA5", "GRIA3", "HTR2B", "SLC26A4", "SCN2B", "SLC1A7", "KCNT2", "KCNE1", "KCNMA1", "ATP1B4", "CHRNA3", "SLC16A4", "GLRB", "KCNS3", "ABCC8", "SCN3B", "SCN4B", "ATP1B2", "KCNA4", "SLC40A1", "PKD2", "KCNC4", "KCNK6", "RYR3", "PKD1L1", "KCNMB4", "SLC5A7", "CACNA2D1", "SLC16A7", "SLC44A1", "TPCN1", "SLC16A5", "KCNMB2", "GRIA1", "ATP5S", "SLC2A10", "SLC35A1", "TRPM4", "ATP7B", "PKD1", "NNT", "SLC13…
518	SIGNALING BY GPCR%REACTOME%REACT_14797.3	5.92239e-05	0.000339222	0.557332	0.236519	1.8866	255	c("HTR2B", "FZD2", "PENK", "F2RL2", "EDNRA", "JAK2", "PDE1A", "RGS4", "DGKI", "PTGFR", "GRM1", "CX3CR1", "DRD4", "GNB3", "RGS11", "HBEGF", "OR51E1", "LPAR4", "APLNR", "CYSLTR1", "PDE1C", "NET1", "PIK3R1", "TIAM2", "ARHGEF3", "CXCR4", "PTPN11", "FZD1", "RGS17", "MCF2", "GNG11", "P2RY14", "WNT2B", "FZD7", "WNT9A", "CXCR7", "RASGRP1", "RGS6", "RAMP2", "EDN3", "PDE3B", "ARHGEF12", "GNRH1", "RLN2", "C…
519	TUBE MORPHOGENESIS%GO%GO:0035239	5.98124e-05	0.000341934	0.557332	0.383007	2.2731	56	c("SOX4", "BMP4", "LEF1", "PAK1", "FOXS1", "FGF1", "SOX8", "PKD2", "FOXC2", "PRICKLE1", "LRP5", "SOX9", "FOXD2", "SMO", "BBS4", "PKD1", "STIL", "FZD6", "SFRP2", "FGF2", "NPHP3", "FGFR2", "FZD3", "DVL2", "MEF2C", "COBL", "MESP1", "PLXNB2", "HAND2", "GATA4", "RYR2", "CTNNB1", "SETDB2", "VEGFA", "GATA3", "SDCCAG8")
520	SMALL MOLECULE BIOSYNTHETIC PROCESS%GO%GO:0044283	6.13946e-05	0.000350303	0.538434	0.318631	2.18267	100	c("GATM", "SNCA", "SLC44A5", "TM7SF2", "TGFB2", "ELOVL4", "APOA1", "CDO1", "LTC4S", "SLC44A1", "CYP46A1", "DECR2", "CSPG5", "CHST14", "GAMT", "FGF2", "LCAT", "MGST3", "SLC27A1", "HMGCL", "MAT2B", "ACOX2", "PSPH", "HAAO", "UROS", "LPL", "CYP7B1", "LIAS", "ACADM", "SRR", "OAT", "GLS2", "SCP2", "CHKB", "HAND2", "ADM", "MLYCD", "SLC44A2", "SAMD8", "APIP", "IDI2", "COQ3", "GLUD1", "NPC1L1", "CNBP", "B…
521	CHROMOSOMAL PART%GO%GO:0044427	6.17886e-05	0.000351554	0.538434	0.271716	2.0219	164	c("CENPA", "NDC80", "RUNX2", "HIST1H2AC", "MYCN", "CCND2", "ZSCAN4", "CBX7", "PIF1", "MCM2", "PPP1R10", "HIST1H2BC", "NCAPD3", "MPHOSPH8", "HIST1H2BG", "SMARCA2", "PSIP1", "TPR", "RNF20", "DYNLL1", "GABPA", "TCF7L2", "STAG2", "PURA", "NCAPD2", "ATM", "PLCB1", "BUB1", "H1FX", "BAZ1B", "DCTN1", "HIST1H2AE", "HIST1H4H", "TP73", "AR", "MAD2L1", "CLASP1", "SIRT1", "DSN1", "HIST1H4E", "NUP37", "SUGT1",…
522	RESPONSE TO ORGANIC NITROGEN%GO%GO:0010243	6.18507e-05	0.000351554	0.538434	0.285287	2.07371	142	c("SNCA", "SOCS2", "IGFBP5", "SFRP1", "JAK2", "CRHBP", "DRD4", "GNB3", "HDAC9", "APLP1", "CHRNA3", "FOXS1", "FGF1", "FGF18", "ATP6V1G2", "BCL2", "PIK3R1", "FOXC2", "RYR3", "PTPN11", "GNG11", "SOX9", "SORT1", "GRB10", "UBR1", "GAB1", "PDE3B", "GHR", "GNAI1", "GNG2", "PRKAA2", "ADCY2", "TSC1", "FGF2", "NLRP1", "HDAC5", "FGFR2", "ABAT", "MEF2C", "ASPH", "FGFR3", "CISH", "SORBS1", "FGF9", "BRCA1", "S…
523	REGULATION OF ION HOMEOSTASIS%GO%GO:2000021	6.43368e-05	0.000364985	0.538434	0.384559	2.2353	51	c("KCNA5", "HTR2B", "SNCA", "THY1", "SLC30A2", "SCN2B", "SCN3B", "SCN4B", "BCL2", "MLLT11", "PKD2", "CAPN3", "NPPB", "FGF2", "FHL1", "CAV3", "ASPH", "ITPR1", "CACNA1D", "P2RX7", "HES5", "F2R", "CAMK2D", "SMAD7", "TRPC1", "DMD", "IBTK", "BBC3", "RYR2", "SRI", "SLC8A1")
524	NEGATIVE REGULATION OF LOCOMOTION%GO%GO:0040013	6.55393e-05	0.000371098	0.538434	0.384119	2.23275	51	c("SULF1", "THY1", "IGFBP5", "SFRP1", "DPYSL3", "PODN", "APOE", "IGFBP3", "KANK1", "MAP2K5", "TP53INP1", "APOD", "RNF20", "ROBO1", "PTGER4", "PTPRM", "PLCB1", "SFRP2", "FGF2", "HDAC5", "SMAD7", "VCL", "SP100", "PKP2", "MAGI2", "SRGAP2", "KRIT1", "NBL1")
525	RENAL SYSTEM DEVELOPMENT%GO%GO:0072001	6.68761e-05	0.000377945	0.538434	0.364794	2.21918	60	c("PLCE1", "PROM1", "MME", "SOX4", "SULF1", "BMP4", "FOXS1", "FGF1", "ACE", "PCSK5", "SOX8", "PKD2", "FOXC2", "SULF2", "DACT2", "SOX9", "FOXD2", "SMO", "PKD1", "CEP290", "FGF2", "NPHP3", "FGFR2", "MEF2C")
526	SULFUR COMPOUND BINDING%GO%GO:1901681	6.81202e-05	0.000384245	0.538434	0.433678	2.35101	40	c("THBS4", "COMP", "POSTN", "SERPINE2", "CFH", "MDK", "SFRP1", "DPYSL3", "APOE", "AGRN", "HBEGF", "FGF1", "COL13A1", "PCOLCE2")
527	NEGATIVE REGULATION OF PROTEIN METABOLIC PROCESS%GO%GO:0051248	6.96546e-05	0.000392154	0.538434	0.270001	2.00582	162	c("SERPINE2", "SNCA", "SOX4", "THY1", "IGFBP5", "SFRP1", "BMP4", "UCHL1", "RGS4", "APOE", "STK38L", "IGFBP3", "PLAT", "ENC1", "MASP1", "CAPN3", "PTPN3", "EIF4EBP3", "MYOCD", "MAP2K5", "LRP5", "APOM", "SAMD4A", "CNKSR3", "MDM4", "APOD", "INHBA", "FAM129A", "TPR", "SOCS4", "DNMT3B", "NTF3", "DUSP6", "SFRP2", "TSC1", "ZNF540", "FGFR1OP", "DAPK3", "TP73", "DUSP16", "CAV3", "ANAPC10", "UBB", "MAD2L1",…
528	GLYCEROPHOSPHOLIPID METABOLIC PROCESS%GO%GO:0006650	7.02122e-05	0.000394545	0.538434	0.337759	2.20744	80	c("HTR2B", "ENPP2", "SLC44A5", "APOA1", "INPP4B", "PIK3R1", "SLC44A1", "ALDH5A1", "AGPAT4", "PIK3C2B", "MBOAT2", "PLA2G4C", "AGPAT9", "PIP4K2B", "ATM", "PLCB1", "MTMR4", "FGF2", "THEM5", "LCAT", "PGAP1", "PIGK", "MPPE1", "PIGM", "SLC27A1", "PIGZ", "PIGP", "DPM3", "DPM1", "PIK3R2", "SYNJ2", "CDS2", "GPLD1", "MTMR14", "PIK3C3", "CHKB", "PIK3CG", "GPAM", "PIGV", "AGPAT1", "MTMR3", "SLC44A2", "AGPAT2…
529	CELL SURFACE%GO%GO:0009986	7.25015e-05	0.000406639	0.538434	0.30289	2.13135	115	c("SFRP4", "PROM1", "SERPINE2", "SULF1", "HSPA2", "THY1", "TNFRSF4", "SFRP1", "ACE2", "PTPRR", "PLAT", "HBEGF", "DPP4", "ACE", "CA4", "BCAM", "CD6", "MCAM", "CXCR4", "SULF2", "FZD1", "GRIA1", "ATPIF1", "SORT1", "AMOT", "HLA-DRB1", "RAMP2", "ENOX2", "ADAMTS13", "VCAM1", "GHR", "PLA2R1", "ROBO1", "GP1BA", "CEP290", "ISLR2", "RTN4R", "NLGN4X", "FGFR2", "F10", "IL2RB", "CD36", "NLGN1", "APP", "NCAM1"…
530	LYSOSOMAL LUMEN%GO%GO:0043202	7.33979e-05	0.000410116	0.538434	0.436995	2.27948	35	c("FMOD", "OGN", "CTSK", "LUM", "OMD", "AGRN", "PRELP", "GPC6", "ASAH1", "CTSF", "SDC2", "CSPG5", "HEXB", "IDS", "HEXA", "GPC1", "IDUA", "HSPG2")
531	VACUOLAR LUMEN%GO%GO:0005775	7.33979e-05	0.000410116	0.538434	0.436995	2.27948	35	c("FMOD", "OGN", "CTSK", "LUM", "OMD", "AGRN", "PRELP", "GPC6", "ASAH1", "CTSF", "SDC2", "CSPG5", "HEXB", "IDS", "HEXA", "GPC1", "IDUA", "HSPG2")
532	POTASSIUM ION TRANSMEMBRANE TRANSPORTER ACTIVITY%GO%GO:0015079	7.38322e-05	0.000411767	0.538434	0.435316	2.2945	36	c("KCNA5", "KCNT2", "KCNE1", "KCNMA1", "KCNS3", "ABCC8", "ATP1B2", "KCNA4", "PKD2", "KCNC4", "KCNK6", "KCNMB4", "KCNMB2", "SLC24A1", "KCNK17", "KCNS1", "ATP1A2")
533	CILIUM MORPHOGENESIS%GO%GO:0060271	7.52384e-05	0.000418822	0.538434	0.437681	2.31976	37	c("CC2D2A", "TTC8", "INTU", "GSN", "TTC26", "DZIP1", "BBS10", "BBS1", "LRRC6", "BBS4", "SPAG16", "TMEM107", "CEP290", "NPHP3", "TTLL3", "IFT88", "TMEM67", "STK36", "MKS1", "TCTN1", "BBS2", "IFT172", "WDR35", "NEK1")
534	PROTEIN BINDING, BRIDGING%GO%GO:0030674	7.54811e-05	0.000419386	0.538434	0.396064	2.27362	49	c("COL14A1", "SOCS2", "CHN1", "COL1A2", "FLRT2", "SORBS2", "PIK3R1", "ARHGAP1", "COL8A2", "PTPN11", "GAB2", "CRADD", "SHB", "BICD1", "GAB1", "ANK1", "CHN2", "SH3BGR", "COL19A1", "STAM", "SORBS1", "SH3BGRL", "LDLRAP1")
535	GTPASE ACTIVATOR ACTIVITY%GO%GO:0005096	7.66887e-05	0.0004253	0.538434	0.384816	2.21732	50	c("HTR2B", "THY1", "RGS4", "RGS11", "RGS5", "RABGAP1L", "DOCK1", "ALDH1A1", "ARHGAP1", "RGS17", "RGS6", "RALBP1", "RABGAP1", "LLGL1", "PLCB1", "RASAL2", "SYNGAP1", "ARHGEF6", "TBC1D15", "ELMOD2", "RGS3", "ARRB1", "USP6NL", "LRRK2", "RASGRP3", "RAB3GAP1", "ARHGAP29", "SRGAP2")
536	GOLGI APPARATUS PART%GO%GO:0044431	7.75049e-05	0.000429024	0.538434	0.264938	1.96653	161	c("FMOD", "ST8SIA2", "OGN", "PROS1", "LUM", "OMD", "PDGFD", "AGRN", "CHST6", "SH3GL2", "RASSF9", "CHSY3", "PRELP", "GPC6", "ST8SIA4", "NMNAT2", "PCSK5", "B3GNT2", "COPZ2", "EXT1", "RAB26", "DOPEY1", "MGAT3", "SCAMP5", "VPS41", "HLA-DRB5", "HLA-DRB1", "PLK3", "SLC35A1", "COG7", "ST3GAL3", "SDC2", "CSPG5", "CHST14", "ATP7B", "LLGL1", "GALNT11", "ABCB4", "GOLGA3", "B3GNT8", "FUT8", "HS2ST1", "ST3GAL…
537	MITOTIC CELL CYCLE%GO%GO:0000278	7.87942e-05	0.000435349	0.538434	0.263961	1.96992	168	c("CCND1", "CENPA", "NDC80", "WEE1", "TPD52L1", "MAP4", "NES", "MCM2", "LIN9", "PLK2", "NUSAP1", "INHBA", "BTRC", "PLK3", "GINS2", "DYNLL1", "CEP57", "STMN1", "STAG2", "CDKN2B", "KIF20B", "CEP290", "PLCB1", "BUB1", "MCM4", "DCTN1", "PRDM5", "FGFR1OP", "PPP2R3B", "ID2", "ANAPC10", "TUBG2", "PRC1", "UBB", "TAF1", "SKP2", "ALMS1", "MAD2L1", "KLF11", "CDK5RAP2", "E2F8", "CLASP1", "UBE2D1", "CDKN1B", …
538	MEMBRANE LIPID METABOLIC PROCESS%GO%GO:0006643	7.94793e-05	0.000438318	0.538434	0.371968	2.25476	59	c("ST8SIA2", "ST8SIA5", "ARSJ", "ORMDL3", "ST8SIA4", "ALDH5A1", "ASAH1", "ARSD", "COL4A3BP", "HEXB", "ARSG", "PRKD1", "ST3GAL6", "HEXA", "PGAP1", "PIGK", "SMPD3", "MPPE1", "PIGM", "ST6GALNAC4", "PIGZ", "ARSI", "PIGP", "STS", "DPM3", "ST6GALNAC6", "DPM1", "NEU3", "SUMF1", "GPLD1", "PIGV", "SAMD8", "VAPB", "B3GNT5", "VAPA", "DEGS2")
539	MITOCHONDRIAL PART%GO%GO:0044429	8.06567e-05	0.000443986	0.538434	0.238074	1.90219	262	c("GATM", "PPP2R2B", "SPATA18", "ACADL", "BCL2", "RSAD2", "UCP2", "CYP11A1", "ALDH5A1", "CA5B", "PDK3", "ATPIF1", "ALDH4A1", "CPT2", "CASQ1", "CBR4", "CPT1B", "NR3C1", "OMA1", "ACSS1", "TK2", "BCL2L11", "IVD", "NNT", "MFN2", "OXCT1", "HSD17B8", "THEM5", "RARS2", "BCKDHA", "ABAT", "MRPL10", "NDUFA11", "D2HGDH", "L2HGDH", "GK2", "SLC25A11", "HMGCL", "SIRT4", "ACADSB", "BMF", "RHOT2", "ACAD11", "ALD…
540	REGULATION OF PROTEIN CATABOLIC PROCESS%GO%GO:0042176	8.11722e-05	0.000445996	0.538434	0.38529	2.24993	52	c("APOE", "ASB9", "PTPN3", "PRICKLE1", "MDM4", "OSBPL7", "PLK3", "DACT1", "CLU", "PACSIN3", "TAF1", "MAD2L1", "GABARAPL2", "VIP", "CDKN1B", "PPP2R3A", "APC", "NEDD4L", "PSMD10", "SMAD7", "SH3D19", "PIAS1", "NKD1", "COMMD1", "NELL1", "GPLD1", "GIPC1", "LRRK2", "NUB1", "FZR1", "FBXW7", "FHIT", "SUMO1", "C5ORF41", "TRIM32", "DAB2IP", "TRIB2", "C2ORF28", "TNF", "SMAD4", "TLK2", "USP5", "SUMO2")
541	MORPHOGENESIS OF A BRANCHING EPITHELIUM%GO%GO:0061138	8.31972e-05	0.000455436	0.538434	0.476947	2.34635	29	c("BMP4", "LEF1", "PAK1", "FOXS1", "FGF1", "SOX8", "PKD2", "FOXC2", "LRP5", "SOX9", "FOXD2", "PKD1", "SFRP2", "FGF2", "FGFR2")
542	ORGANIC HYDROXY COMPOUND TRANSPORT%GO%GO:0015850	8.31972e-05	0.000455436	0.538434	0.475413	2.3388	29	c("SNCA", "APOE", "APOA1", "SCARB1", "SLC44A1", "APOM", "CPT2", "CPT1B", "PRKAA2", "LCAT", "CLU", "PGAP1", "LDLRAP1", "CD36", "PRKAB2", "APOC1", "SLC25A20", "SLC44A2", "NPC1L1", "SLC16A8", "ABCA1", "VPS4B")
543	CELL CYCLE%REACTOME%REACT_115566.3	8.53394e-05	0.000466302	0.538434	0.255189	1.93965	184	c("HSPA2", "CCND1", "CENPA", "NDC80", "HIST1H2AC", "CCND2", "WEE1", "REC8", "MCM2", "LIN9", "BTRC", "HIST1H2BC", "HIST1H2BG", "GINS2", "DYNLL1", "CEP57", "STAG2", "CDKN2B", "PPP2R1B", "TK2", "CEP290", "NCAPD2", "ATM", "BUB1", "MCM4", "HIST1H2AE", "FGFR1OP", "PPP2R3B", "HIST1H4H", "ANAPC10", "TUBG2", "UBB", "SKP2", "ALMS1", "MAD2L1", "CDK5RAP2", "CLASP1", "UBE2D1", "BRCA1", "CDKN1B", "DSN1", "HIST…
544	CAMERA-TYPE EYE DEVELOPMENT%GO%GO:0043010	8.65307e-05	0.000471298	0.538434	0.428998	2.32564	40	c("PROM1", "THY1", "FOXS1", "DIXDC1", "SOX8", "NES", "FOXC2", "LRP5", "WNT2B", "SOX9", "WNT9A", "INHBA", "SMO", "BMPR2", "PTPRM", "SHROOM2", "TSPAN12", "NPHP1", "PROX1", "HES5", "RAB3GAP1", "GPM6A", "FOXP2", "PAX6", "SMARCD3", "VEGFA", "NF1", "TWIST1")
545	VALIDATED TARGETS OF C-MYC TRANSCRIPTIONAL REPRESSION%PATHWAY INTERACTION DATABASE NCI-NATURE CURATED DATA%VALIDATED TARGETS OF C-MYC TRANSCRIPTIONAL REPRESSION	8.67129e-05	0.000471298	0.538434	0.48404	2.35138	28	c("CCND1", "SFRP1", "GADD45A", "COL1A2", "BCL2", "DDIT3", "CDKN2B", "CCL5", "CLU", "ID2", "BRCA1", "CDKN1B", "TJP2", "EP300", "NFYC", "CSDE1", "HDAC3", "ITGB4", "TBP", "FTH1", "RBL1", "NFYA", "ALDH9A1", "LGALS1", "NFYB", "SMAD4")
546	NEGATIVE REGULATION OF CELLULAR PROTEIN METABOLIC PROCESS%GO%GO:0032269	8.67302e-05	0.000471298	0.538434	0.272714	1.9955	147	c("SERPINE2", "SNCA", "SOX4", "THY1", "IGFBP5", "SFRP1", "BMP4", "UCHL1", "RGS4", "APOE", "STK38L", "IGFBP3", "PLAT", "ENC1", "CAPN3", "PTPN3", "EIF4EBP3", "MYOCD", "LRP5", "SAMD4A", "CNKSR3", "FAM129A", "TPR", "SOCS4", "DNMT3B", "NTF3", "DUSP6", "SFRP2", "TSC1", "ZNF540", "FGFR1OP", "DAPK3", "TP73", "DUSP16", "CAV3", "ANAPC10", "UBB", "MAD2L1", "UBE2D1", "BRCA1", "SIRT1", "DUSP8", "TNRC6A", "PHF…
547	REGULATION OF REPRODUCTIVE PROCESS%GO%GO:2000241	8.71761e-05	0.000472854	0.538434	0.34958	2.21442	70	c("SULF1", "MDFIC", "LEF1", "IFIT1", "RNASEL", "APOBEC3G", "RSAD2", "APOBEC3F", "SOX9", "TNIP1", "INHBA", "MSH2", "PLCB1", "CCL5", "GTF2F2", "FGFR2", "GDF9", "APOBEC3C", "SUPT16H", "SUPT5H", "PPIH", "EP300", "RSF1", "POLR2G", "PROX1", "ZP3", "SP100", "NPM2", "REST", "ERCC2", "GTF2H1", "POLR2C", "VAPB", "CTNNB1", "POLR2A", "GTF2H3", "POLR2I", "PPID", "MNAT1", "NANOS2", "POLR2K", "TCEA1", "SUPT4H1"…
548	ALCOHOL METABOLIC PROCESS%GO%GO:0006066	8.88989e-05	0.00048132	0.538434	0.370627	2.24663	59	c("ENPP2", "APOE", "SLC44A5", "TM7SF2", "APOA1", "ALDH1A1", "CYP11A1", "SLC44A1", "IGF1", "MBOAT2", "CYP46A1", "PLA2G4C", "ACSS1", "FGF2", "LCAT", "NR0B2", "SMPD3", "GK2", "SLC27A1", "ALDH3A2", "LDLRAP1", "NUDT3", "DPM1", "OSBPL1A", "GPLD1", "SCP2", "CHKB", "SLC44A2", "SAMD8", "IDI2", "COQ3", "NPC1L1", "CNBP", "ENPP6", "FDFT1", "ABCA1")
549	DISEASE%REACTOME%REACT_116125.4	8.96811e-05	0.00048467	0.538434	0.227199	1.84783	306	c("FMOD", "KIT", "SNCA", "OGN", "LUM", "JAK2", "OMD", "PDE1A", "APOE", "AGRN", "HIST1H2AC", "NPPA", "CHST6", "HDAC9", "HBEGF", "SH3GL2", "FGF1", "FGF18", "CHSY3", "PRELP", "ATP6V1G2", "APOA1", "GPC6", "FYN", "B3GNT2", "PDE1C", "EXT1", "PIK3R1", "RPS4Y1", "HAS3", "PACS1", "CXCR4", "PTPN11", "VAMP1", "GAB2", "GSN", "BTRC", "HIST1H2BC", "RICTOR", "GAB1", "HIST1H2BG", "ST3GAL3", "SDC2", "PSIP1", "TPR…
550	NRAGE SIGNALS DEATH THROUGH JNK%REACTOME%REACT_13638.1	9.02565e-05	0.000486893	0.538434	0.513766	2.28708	22	c("NET1", "TIAM2", "ARHGEF3", "MCF2", "ARHGEF12", "ARHGEF4", "BCL2L11", "KALRN", "AKAP13", "ARHGEF9", "OBSCN", "SOS2", "ARHGEF6", "ARHGEF2")
551	REGULATION OF BINDING%GO%GO:0051098	9.1702e-05	0.000493793	0.538434	0.376722	2.22954	55	c("JAK2", "LEF1", "IFIT2", "IFIT1", "BCL2", "NES", "GZMA", "BAMBI", "HMGB2", "IGF1", "SMO", "NRP1", "TCF7L2", "PKD1", "VTN", "HDAC5", "HDAC4", "MEF2C", "LDLRAP1", "MDFI", "RSF1", "NFIB", "SIN3A", "ZNF675", "SP100", "TNKS", "HABP4", "HAND2", "TRAF6", "PRMT7", "TIRAP", "SUMO1", "EDF1", "GATA3", "TWIST1")
552	REGULATION OF PROTEIN BINDING%GO%GO:0043393	9.38807e-05	0.000504609	0.538434	0.496511	2.27804	24	c("LEF1", "IFIT2", "IFIT1", "BCL2", "NES", "BAMBI", "NRP1", "TCF7L2", "PKD1", "VTN", "HDAC5", "HDAC4", "MEF2C", "LDLRAP1")
553	REGULATION OF RESPONSE TO EXTERNAL STIMULUS%GO%GO:0032101	9.77185e-05	0.000524287	0.538434	0.304437	2.1125	107	c("THBS4", "SERPINE2", "PROS1", "CFH", "JAK2", "APOE", "ACE2", "PLAT", "SCG2", "APOA1", "MASP1", "SOX15", "VEGFC", "CAPN3", "CXCR4", "IL33", "GPR124", "TNIP1", "JAM3", "APOD", "HLA-DRB1", "EDN3", "ULK1", "THBS3", "ROBO1", "NTF3", "GP1BA", "NRBP2", "BBS4", "PTGER4", "VTN", "EFNB2", "CCL5", "PRKD1", "FGF2", "NLRP1")
554	PROTEIN LOCALIZATION TO PLASMA MEMBRANE%GO%GO:0072659	9.87695e-05	0.000528969	0.538434	0.563429	2.27193	17	c("SCN3B", "PACS1", "SPTBN1", "FGF13", "RAMP2", "ANK1", "P2RY1", "FCHO2", "CAV3", "PACSIN1", "EHD3", "GAS6", "SCP2")
555	SULFUR COMPOUND METABOLIC PROCESS%GO%GO:0006790	9.98722e-05	0.000533912	0.538434	0.316446	2.14807	97	c("FMOD", "OGN", "SULF1", "LUM", "OMD", "AGRN", "GSTM5", "NOX4", "CHST6", "CHSY3", "PRELP", "GPC6", "B3GNT2", "EXT1", "CDO1", "CSAD", "SULF2", "LTC4S", "ALDH5A1", "GSTA4", "ST3GAL3", "SDC2", "GAL3ST3", "CSPG5", "SULT1C4", "HEXB", "GHR", "IDS", "CHST14", "GLCE", "ARSG", "ST3GAL6", "HEXA", "MGST3", "GPC1", "CHST8", "MAT2B", "IDUA", "HSPG2")
556	REGULATION OF AUTOPHAGY%GO%GO:0010506	0.000100753	0.000537155	0.538434	0.454011	2.27219	31	c("HTR2B", "BCL2", "TP53INP1", "TP53INP2", "ULK1", "NRBP2", "PRKAA2", "DAPK3", "SIRT1", "SUPT5H", "MAPT", "ZKSCAN3", "USP13", "PARK2", "TFEB", "RAB33B", "LRRK2", "PAFAH1B2", "ULK2", "AKT1", "TBC1D14")
557	METAL ION TRANSPORT%GO%GO:0030001	0.000100841	0.000537155	0.538434	0.29907	2.11136	117	c("KCNA5", "HTR2B", "SCN2B", "KCNT2", "KCNMB1", "KCNE1", "KCNMA1", "KCNS3", "ABCC8", "SCN3B", "SCN4B", "ATP6V1G2", "CDH23", "KCNAB1", "FYN", "KCNA4", "SLC40A1", "PKD2", "KCNC4", "KCNK6", "SLC30A1", "RYR3", "KCNMB4", "CACNA2D1", "KCNMB2", "RAMP2", "LMTK2", "ATP7B", "CCL5", "SLC24A1", "FGF2", "KCNK17", "KCNS1", "ASPH", "ATP1A2", "SLC38A7", "ITPR1", "SCN3A", "SCN4A", "CACNA1D", "ATP2A3", "SCNN1B", "…
558	POSITIVE REGULATION OF TRANSFERASE ACTIVITY%GO%GO:0051347	0.000102809	0.000546654	0.538434	0.288349	2.07189	133	c("HTR2B", "PLCE1", "KIT", "SNCA", "CCND1", "JAK2", "BMP4", "MDFIC", "DRD4", "PAK1", "TGFB2", "CHRNA3", "CCND2", "TPD52L1", "PKD2", "KDELR3", "CXCR4", "MAP2K5", "TNIK", "FGF13", "GFPT1", "EDN3", "KIDINS220", "PILRB", "DDIT3", "GHR", "ALS2", "NTF3", "SEC31A", "PKD1", "ADCY2", "ADORA2B", "FGF2", "DOK7", "DCTN1", "DVL2", "MAP3K1", "UBB", "DVL3", "FGFR3", "WIPI1", "SIRT1", "DDR2", "AFAP1L2", "S1PR2",…
559	PROTEIN SERINE/THREONINE KINASE ACTIVITY%GO%GO:0004674	0.000103433	0.00054899	0.538434	0.294488	2.06471	113	c("STK38L", "PAK1", "TGFB2", "LTBP4", "ICK", "BRSK1", "SNRK", "MAPK12", "PLK2", "PDK3", "TNIK", "TSSK6", "PLK3", "LMTK2", "ULK1", "EIF2AK2", "MAP4K4", "CLK4", "DYRK2", "BMPR2", "SRPK3", "AKAP13", "ATM", "NUAK1", "PRKAA2", "PRKD1", "TLK1", "CLK1", "DAPK3", "MAP3K1", "CDK5", "TAF1", "CDC42BPB", "MAP3K12", "BMPR1A", "PRKAB2", "STK36", "MAPK10", "DYRK4", "VRK1", "ROCK1", "SLK", "ILK", "LRRK2", "SQSTM…
560	ANGIOGENESIS%GO%GO:0001525	0.000105604	0.00055951	0.538434	0.371926	2.24604	58	c("THY1", "BMP4", "LEF1", "TGFB2", "FOXS1", "SCG2", "ESM1", "PLXDC1", "MCAM", "FOXC2", "GPR124", "ATPIF1", "JAM3", "APOD", "EPHB3", "RAMP2", "ROBO1", "FZD6", "SFRP2", "EFNB2", "JAG1", "FGF2", "FGFR2", "E2F8", "SIRT1")
561	VALIDATED TRANSCRIPTIONAL TARGETS OF TAP63 ISOFORMS%PATHWAY INTERACTION DATABASE NCI-NATURE CURATED DATA%VALIDATED TRANSCRIPTIONAL TARGETS OF TAP63 ISOFORMS	0.000106762	0.000564642	0.538434	0.490565	2.28301	25	c("SPATA18", "IGFBP3", "GDF15", "GADD45A", "PERP", "TP53I3", "BTRC", "CABLES1", "S100A2", "JAG1", "DST", "HBP1", "YWHAQ", "EP300", "DHRS3", "ITGB4", "BBC3", "MFGE8", "SMARCD3")
562	POSITIVE REGULATION OF SECRETION%GO%GO:0051047	0.000110646	0.000584142	0.538434	0.373609	2.21732	56	c("HTR2B", "SOX4", "TNFRSF4", "TGFB2", "TGFB3", "ANKRD1", "IL33", "NPPB", "GAB2", "SCAMP5", "MYRIP", "INHBA", "HLA-DRB1", "EDN3", "BMP6", "TCF7L2", "PLA2R1", "CADM1", "PTGER4", "PLCB1", "NLRP1", "GCK", "NLGN1", "P2RX7", "F2R", "ZP3", "GPLD1", "CLEC9A", "GLUD1", "STXBP5", "GATA3", "C1QTNF3", "PPID", "TWIST1", "RAB27B")
563	NEGATIVE REGULATION OF SEQUENCE-SPECIFIC DNA BINDING TRANSCRIPTION FACTOR ACTIVITY%GO%GO:0043433	0.000112071	0.000590026	0.538434	0.405944	2.27822	45	c("SFRP4", "TNFRSF4", "ESR1", "TCEAL7", "FOXS1", "PRMT2", "MAP2K5", "BTRC", "DDIT3", "TCF7L2", "FZD6", "WWP2", "HDAC4", "NR0B2", "ID2", "COMMD6", "SIRT1", "PROX1", "PSMD10", "SMAD7", "ZNF675", "SP100", "COMMD1", "ARRB1", "GAS6")
564	CELL-MATRIX ADHESION%GO%GO:0007160	0.000112159	0.000590026	0.538434	0.460946	2.2925	30	c("ECM2", "THY1", "SGCE", "COL13A1", "DDR1", "ITGA8", "BCAM", "ITGA10", "COL3A1", "ADAMTS13", "THBS3", "PKD1", "VTN", "TSC1", "ACTN2", "SORBS1")
565	BLOOD VESSEL MORPHOGENESIS%GO%GO:0048514	0.000114665	0.000602144	0.538434	0.330833	2.15123	78	c("SOX4", "THY1", "BMP4", "LEF1", "TGFB2", "FOXS1", "SCG2", "ESM1", "PLXDC1", "PKD2", "MCAM", "FOXC2", "LRP5", "HPGD", "GPR124", "TNNI3", "ATPIF1", "JAM3", "APOD", "EPHB3", "RAMP2", "SMO", "ROBO1", "FZD6", "SFRP2", "EFNB2", "JAG1", "FGF2", "FGFR2", "E2F8", "SIRT1")
566	POSITIVE REGULATION OF INTRACELLULAR PROTEIN KINASE CASCADE%GO%GO:0010740	0.000115305	0.000604432	0.538434	0.279644	2.0141	135	c("HTR2B", "PLCE1", "KIT", "JAK2", "MDFIC", "DRD4", "PAK1", "TGFB2", "HBEGF", "NTRK2", "FGF1", "TPD52L1", "TNFSF10", "MID1", "CXCR4", "S100A13", "EDA2R", "PELI2", "MAP2K5", "PLK2", "FZD7", "IGF1", "EDN3", "P2RY1", "GHR", "TCF7L2", "NTF3", "PLCB1", "CCL5", "ADORA2B", "PRKD1", "FGF2", "FGFR2", "DVL2", "F10", "UBB", "DVL3", "FGFR3", "S1PR2", "NLGN1", "MAPK10", "TMED4", "CXXC5", "HES5", "ATP2C1", "F2…
567	REGULATION OF LIPID BIOSYNTHETIC PROCESS%GO%GO:0046890	0.000115927	0.000605681	0.538434	0.456266	2.32491	32	c("APOE", "ACADL", "FGF1", "SCARB1", "BMP6", "PRKAA2", "SORBS1", "SLC27A1", "BRCA1", "SIRT1", "PRKAB2", "APOC1", "PROX1", "ZP3", "DKK3", "GPLD1", "REST", "STK11", "SAMD8", "FBXW7", "AKT1")
568	SINGLE-ORGANISM CATABOLIC PROCESS%GO%GO:0044712	0.000116155	0.000605681	0.538434	0.316342	2.12173	91	c("ENPP2", "DDAH1", "ACADL", "ASPA", "CDO1", "RENBP", "CSAD", "ALDH5A1", "ALDH4A1", "CPT2", "CYP46A1", "CYP26B1", "ACOT4", "HGD", "BDH2", "IVD", "OXCT1", "BCKDHA", "ABAT", "SMPD3", "PLA2G15", "HMGCL", "ACOX1", "ACADSB", "NUDT3", "ACOX2", "ACAD11", "HAAO", "ALDH6A1", "AUH", "ACADM", "PCCB", "SCP2", "ABHD10", "PHYH", "HIBADH", "HIBCH", "AFMID", "GLUD1", "DBT", "MCEE", "AADAT", "ACSF3", "ACAD8", "PC…
569	SMALL MOLECULE CATABOLIC PROCESS%GO%GO:0044282	0.000116155	0.000605681	0.538434	0.316342	2.12173	91	c("ENPP2", "DDAH1", "ACADL", "ASPA", "CDO1", "RENBP", "CSAD", "ALDH5A1", "ALDH4A1", "CPT2", "CYP46A1", "CYP26B1", "ACOT4", "HGD", "BDH2", "IVD", "OXCT1", "BCKDHA", "ABAT", "SMPD3", "PLA2G15", "HMGCL", "ACOX1", "ACADSB", "NUDT3", "ACOX2", "ACAD11", "HAAO", "ALDH6A1", "AUH", "ACADM", "PCCB", "SCP2", "ABHD10", "PHYH", "HIBADH", "HIBCH", "AFMID", "GLUD1", "DBT", "MCEE", "AADAT", "ACSF3", "ACAD8", "PC…
570	POSITIVE REGULATION OF HOMEOSTATIC PROCESS%GO%GO:0032846	0.000116932	0.000608663	0.538434	0.551297	2.27644	18	c("SNCA", "THY1", "SGIP1", "MLLT11", "CAPN3", "ASPH", "PTGER3", "ACOX1", "PPARGC1A", "P2RX7", "F2R", "TNKS", "TRPC1")
571	STRIATED MUSCLE CELL DEVELOPMENT%GO%GO:0055002	0.000118753	0.000617056	0.538434	0.581626	2.30013	16	c("MYOZ1", "LEF1", "MYH11", "CAPN3", "ANKRD1", "CSRP3", "OBSCN", "MYPN", "PROX1", "F2R", "LRRK2", "MEF2A", "OBSL1", "VEGFA", "NEBL")
572	LIGASE ACTIVITY, FORMING CARBON-NITROGEN BONDS%GO%GO:0016879	0.000122524	0.000635539	0.518848	0.290164	2.04649	116	c("HERC5", "MYLIP", "HECW2", "UBE2H", "KLHL13", "HERC6", "FBXL14", "RNF103", "RNF217", "BTRC", "UBE2Q2", "TRIM33", "LMO7", "HECTD2", "RNF20", "FBXO4", "TRIM2", "RNF146", "MTHFD2L", "WWP2", "FANCL", "ANAPC10", "FBXW11", "ATPBD4", "TTLL3", "FBXO21", "UBE2D1", "PIAS2", "BRCA1", "BTD", "NSMCE1", "UBE2W", "TTC3", "TTLL1", "LIAS", "DDB2", "FBXO9", "PARK2", "NEDD4L", "MTHFD1", "RNF25", "PIAS1", "BCOR", …
573	PROTEIN AUTOPHOSPHORYLATION%GO%GO:0046777	0.000123372	0.000638822	0.518848	0.400275	2.23747	44	c("KIT", "JAK2", "PAK1", "NTRK2", "DDR1", "CAMK2B", "TNIK", "EPHB3", "LMTK2", "ULK1", "EIF2AK2", "ATM", "PRKD1", "DAPK3", "FGFR2", "TAF1", "FGFR3", "MAP3K12", "DDR2", "VRK1", "SLK", "IGF1R", "LRRK2", "ULK2", "STK11", "AKT1")
574	LIPID HOMEOSTASIS%GO%GO:0055088	0.000126536	0.000654064	0.518848	0.475418	2.3095	28	c("APOE", "APOA1", "SCARB1", "EPHX2", "LRP5", "APOM", "ACSM3", "PRKAA2", "LCAT", "ABCA2", "CAV3", "ACOX1", "SIRT1", "LDLRAP1", "LPL", "PKP2", "USF2", "FBXW7", "ACSM2A", "ABCA1", "C1QTNF3")
575	REGULATION OF MUSCLE CONTRACTION%GO%GO:0006937	0.00013028	0.000671535	0.518848	0.404127	2.26802	45	c("TNNT1", "KCNA5", "PLCE1", "TNNT3", "SCN2B", "CHRNA3", "SCN3B", "SCN4B", "TPM3", "MYOCD", "MYL5", "DAPK3", "CAV3", "ASPH", "ATP1A2", "TNNI1", "F2R", "CAMK2D", "TNNC2", "SMAD7", "MYL9", "PKP2", "DMD", "PIK3CG", "GJA1", "RYR2", "SRI", "SLC8A1", "CASQ2", "PLN", "DSC2", "TNNC1", "GSTM2")
576	PHOSPHORYLATION%GO%GO:0016310	0.000130369	0.000671535	0.518848	0.236479	1.87095	244	c("HTR2B", "PLCE1", "KIT", "JAK2", "BMP4", "MDFIC", "STK38L", "IGFBP3", "DRD4", "PAK1", "TGFB2", "NTRK2", "DYRK1B", "ICK", "BRSK1", "RNASEL", "DDR1", "FYN", "SNRK", "PIK3R1", "CXCR4", "CAMK2B", "MAPK12", "MAP2K5", "PLK2", "PDK3", "TNIK", "TSSK6", "EPHB3", "COL4A3BP", "PLK3", "KIDINS220", "LMTK2", "ULK1", "EIF2AK2", "MAP4K4", "GHR", "CAMK2G", "NTF3", "NRBP2", "DYRK2", "PKD1", "SRPK3", "KALRN", "AT…
577	NEGATIVE REGULATION OF CYTOSKELETON ORGANIZATION%GO%GO:0051494	0.000134997	0.000694172	0.518848	0.524164	2.29304	21	c("SNCA", "PLEKHH2", "KANK1", "CLIP3", "LIMA1", "FGF13", "GSN", "CAV3", "CDK5RAP2", "CLASP1", "BRCA1", "ARHGEF2", "APC", "PARK2")
578	SIGNALING ADAPTOR ACTIVITY%GO%GO:0035591	0.000135863	0.000697414	0.518848	0.46984	2.25986	27	c("SOCS2", "CHN1", "PIK3R1", "ARHGAP1", "PTPN11", "GAB2", "SHB", "GAB1", "CHN2", "SH3BGR", "STAM", "MAPK8IP1", "SORBS1", "SH3BGRL", "LDLRAP1")
579	AXON%GO%GO:0030424	0.00013803	0.000706635	0.518848	0.387478	2.18362	46	c("SNCA", "MME", "CRHBP", "PAK1", "TGFB2", "CNTN4", "DIXDC1", "SPTBN1", "FGF13", "SEMA6A", "NCDN", "LLGL1", "DST", "FZD3", "CDK5", "SLC38A7", "PACSIN1", "LDLRAP1", "MAPT", "COBL", "APP", "NFIB", "ACADM")
580	IL3%NETPATH%IL3	0.000138136	0.000706635	0.518848	0.472752	2.29655	28	c("SOCS2", "JAK2", "PAK1", "BCL2", "FYN", "PIK3R1", "PTPN11", "GAB2", "GAB1", "PILRB", "BCL2L11", "YWHAQ", "CISH", "PIK3R2", "VCL", "STAT5B", "ATF1", "PRKCA", "AKT1")
581	GLYCEROPHOSPHOLIPID BIOSYNTHETIC PROCESS%GO%GO:0046474	0.000139936	0.000714612	0.518848	0.343735	2.1774	70	c("HTR2B", "SLC44A5", "APOA1", "INPP4B", "PIK3R1", "SLC44A1", "AGPAT4", "PIK3C2B", "MBOAT2", "PLA2G4C", "AGPAT9", "PIP4K2B", "ATM", "MTMR4", "FGF2", "LCAT", "PGAP1", "PIGK", "MPPE1", "PIGM", "SLC27A1", "PIGZ", "PIGP", "DPM3", "DPM1", "PIK3R2", "SYNJ2", "CDS2", "MTMR14", "PIK3C3", "CHKB", "PIK3CG", "GPAM", "PIGV", "AGPAT1", "MTMR3", "SLC44A2", "AGPAT2", "MTM1", "PNPLA2", "PHOSPHO1", "PIK3CA", "ACH…
582	NEUROTROPHIN SIGNALING PATHWAY%GO%GO:0038179	0.000142571	0.000725572	0.518848	0.318611	2.11262	86	c("PDE1A", "NTRK2", "SH3GL2", "PCSK5", "PDE1C", "NET1", "PIK3R1", "TIAM2", "ARHGEF3", "MCF2", "MAPK12", "MAP2K5", "SORT1", "RICTOR", "ARHGEF12", "KIDINS220", "ARHGEF4", "BCL2L11", "DUSP6", "KALRN", "AKAP13", "ARHGEF9", "ADCY2", "RTN4R", "MEF2C", "UBB", "OBSCN", "CDKN1B", "SOS2", "ITPR1", "ARHGEF6", "ARHGEF2", "LINGO1", "PIK3R2", "HDAC3", "SQSTM1", "RAP1A", "ATF1", "PRKCA", "TRAF6", "AP2M1", "MEF2…
583	NEUROTROPHIN TRK RECEPTOR SIGNALING PATHWAY%GO%GO:0048011	0.000142571	0.000725572	0.518848	0.318611	2.11262	86	c("PDE1A", "NTRK2", "SH3GL2", "PCSK5", "PDE1C", "NET1", "PIK3R1", "TIAM2", "ARHGEF3", "MCF2", "MAPK12", "MAP2K5", "SORT1", "RICTOR", "ARHGEF12", "KIDINS220", "ARHGEF4", "BCL2L11", "DUSP6", "KALRN", "AKAP13", "ARHGEF9", "ADCY2", "RTN4R", "MEF2C", "UBB", "OBSCN", "CDKN1B", "SOS2", "ITPR1", "ARHGEF6", "ARHGEF2", "LINGO1", "PIK3R2", "HDAC3", "SQSTM1", "RAP1A", "ATF1", "PRKCA", "TRAF6", "AP2M1", "MEF2…
584	MUSCLE CELL DEVELOPMENT%GO%GO:0055001	0.00014569	0.000740174	0.518848	0.519002	2.27046	21	c("MYOZ1", "LEF1", "MYH11", "CAPN3", "ANKRD1", "RAMP2", "CSRP3", "CAV3", "OBSCN", "MYPN", "PROX1", "F2R", "LRRK2", "MEF2A", "OBSL1", "SLC8A1", "VEGFA")
585	CHANNEL REGULATOR ACTIVITY%GO%GO:0016247	0.000148802	0.000754692	0.518848	0.467417	2.24821	27	c("SCN2B", "DRD4", "KCNE1", "KCNS3", "SCN3B", "SCN4B", "KCNAB1", "SLC30A1", "FGF13", "KCNMB2", "TNNI3", "CAV3", "KCNS1", "NEDD4L", "PKP2", "GPLD1", "STIM2")
586	MOTOR ACTIVITY%GO%GO:0003774	0.000149876	0.000756813	0.518848	0.453116	2.30886	32	c("KIF1A", "MYL7", "MYH10", "KIF13A", "MYO5B", "DNALI1", "MYO10", "DNAH1", "KIF3C", "DYNC2H1", "BBS4", "KIF5B", "KIF7", "KIF15", "KIF1C", "DYNC1H1", "MYO6", "KLC1", "MYL6B")
587	CARBOXYLIC ACID CATABOLIC PROCESS%GO%GO:0046395	0.000149985	0.000756813	0.518848	0.324641	2.13052	81	c("DDAH1", "ACADL", "ASPA", "CDO1", "RENBP", "CSAD", "ALDH5A1", "ALDH4A1", "CPT2", "CYP26B1", "ACOT4", "HGD", "BDH2", "IVD", "BCKDHA", "ABAT", "PLA2G15", "HMGCL", "ACOX1", "ACADSB", "ACOX2", "ACAD11", "HAAO", "ALDH6A1", "AUH", "ACADM", "PCCB", "SCP2", "ABHD10", "PHYH", "HIBADH", "HIBCH", "AFMID", "GLUD1", "DBT", "MCEE", "AADAT", "ACSF3", "ACAD8", "PCBD1", "QDPR", "SUOX", "ACAT1", "CROT", "ALDH7A1…
588	ORGANIC ACID CATABOLIC PROCESS%GO%GO:0016054	0.000149985	0.000756813	0.518848	0.324641	2.13052	81	c("DDAH1", "ACADL", "ASPA", "CDO1", "RENBP", "CSAD", "ALDH5A1", "ALDH4A1", "CPT2", "CYP26B1", "ACOT4", "HGD", "BDH2", "IVD", "BCKDHA", "ABAT", "PLA2G15", "HMGCL", "ACOX1", "ACADSB", "ACOX2", "ACAD11", "HAAO", "ALDH6A1", "AUH", "ACADM", "PCCB", "SCP2", "ABHD10", "PHYH", "HIBADH", "HIBCH", "AFMID", "GLUD1", "DBT", "MCEE", "AADAT", "ACSF3", "ACAD8", "PCBD1", "QDPR", "SUOX", "ACAT1", "CROT", "ALDH7A1…
589	REGULATION OF ORGAN MORPHOGENESIS%GO%GO:2000027	0.000158134	0.000796579	0.518848	0.439987	2.26992	34	c("SULF1", "BMP4", "DIXDC1", "SOX8", "WNT2B", "SOX9", "SMO", "FGFR2", "DVL2", "DVL3", "MESP1", "NFIB", "FOXP1", "BCOR", "NACA", "MAGI2", "HAND2", "ASPN", "POU5F1", "FBXW7", "FOXP2", "CTNNB1", "VEGFA", "GATA3")
590	NEGATIVE REGULATION OF TRANSCRIPTION FROM RNA POLYMERASE II PROMOTER%GO%GO:0000122	0.000160484	0.000807045	0.518848	0.262868	1.95283	162	c("BMP4", "CRYM", "HDAC9", "ZEB1", "PER2", "SOX15", "FOXC2", "CBX7", "MAP2K5", "NR2F1", "MDM4", "CRY2", "TRIM33", "PLK3", "KLF12", "SMARCA2", "TPR", "GATA6", "DNMT3B", "TCF7L2", "ZNF254", "DACT1", "KANK2", "TBL1XR1", "THRA", "SMYD2", "WWP2", "HDAC5", "ZHX1", "HDAC4", "CBX2", "TP73", "FGFR2", "JAZF1", "MEF2C", "ZMYND11", "UBB", "KLF11", "E2F8", "UBE2D1", "SIRT1", "ZNF136", "SUPT5H", "MDFI", "EP300…
591	PHOSPHATIDYLINOSITOL METABOLIC PROCESS%GO%GO:0046488	0.00016211	0.000813843	0.518848	0.389701	2.21526	47	c("HTR2B", "INPP4B", "PIK3R1", "PIK3C2B", "PLA2G4C", "PIP4K2B", "ATM", "PLCB1", "MTMR4", "FGF2", "PGAP1", "PIGK", "MPPE1", "PIGM", "SLC27A1", "PIGZ", "PIGP", "DPM3", "DPM1", "PIK3R2", "SYNJ2", "GPLD1", "MTMR14", "PIK3C3", "PIK3CG", "PIGV", "MTMR3")
592	NEGATIVE REGULATION OF ORGANELLE ORGANIZATION%GO%GO:0010639	0.000164993	0.000826915	0.518848	0.365025	2.23849	63	c("SNCA", "PLEKHH2", "BMP4", "KANK1", "CLIP3", "LIMA1", "FGF13", "GSN", "IGF1", "TPR", "OMA1", "DNMT3B", "ATM", "BUB1", "CAV3", "ANAPC10", "SETMAR", "MAD2L1", "CDK5RAP2", "CLASP1", "UBE2D1", "BRCA1", "ARHGEF2", "TMEM67", "PHF1", "APC", "PARK2", "TERF1", "PSMD10", "SIN3A", "BCOR", "AICDA", "SLC25A5", "TERF2IP", "TWF2", "AKT1")
593	CELL PROLIFERATION%GO%GO:0008283	0.000167313	0.00083713	0.518848	0.26258	1.9419	155	c("PLCE1", "KIT", "NPR3", "SOX4", "TNFRSF4", "EDNRA", "BMP4", "LEF1", "TGFB2", "FSCN1", "CTF1", "FOXS1", "ACE", "ZEB1", "BCL2", "CRIP1", "NES", "FERMT1", "FOXC2", "SERPINF1", "LGI1", "WNT2B", "SOX9", "FGF13", "MDM4", "BTN3A1", "IGF1", "GAB1", "MAPRE2", "NDP", "TCF7L2", "CADM1", "STIL", "FZD6", "SFRP2", "NAB2", "FIGNL1", "PRKD1", "CLK1", "AR", "ID2", "FGFR2", "FZD3", "MEF2C", "CDK5", "ZMYND11", "S…
594	PERINUCLEAR REGION OF CYTOPLASM%GO%GO:0048471	0.000168326	0.00084078	0.518848	0.294057	2.07597	117	c("SNCA", "BDNF", "APLP1", "MAP6", "TPD52L1", "S100A6", "CA4", "CHODL", "S100A13", "MYRIP", "APOD", "SORT1", "HMGB2", "OSBPL7", "BICD1", "COL4A3BP", "LMTK2", "ANP32A", "THBS3", "ATP7B", "SEC31A", "INF2", "PTPRM", "KIF5B", "FGFR1OP", "CLU", "MAD2L1", "CDK5RAP2", "TPD52", "PACSIN1", "MYO16", "TNFSF12", "COBL", "MAGEE1", "MYO6", "ITM2C", "PARK2", "MOSPD1", "ZP3", "ZNF675", "EPHA5", "NELL1", "MTMR14"…
595	CARBOXYLIC ACID BINDING%GO%GO:0031406	0.000170338	0.000849401	0.518848	0.405884	2.24562	43	c("ST8SIA2", "SNCA", "SYTL2", "AGRN", "NOX4", "GLRB", "ST8SIA4", "LCN12", "SCARB1", "SDPR", "UBR1", "CYP26B1", "FCHO2", "ADH5", "PMP2", "TRIM72", "APOC1", "SRR", "GAS6", "SCP2", "FABP4", "MARK1", "SESTD1", "LANCL1", "HIF1AN", "GLUD1")
596	REGULATION OF CELL DIVISION%GO%GO:0051302	0.000173832	0.000865367	0.518848	0.542041	2.23822	18	c("HTR2B", "FGF1", "BBS4", "SFRP2", "FGFR2", "E2F8", "KIF23", "TXNIP", "CETN2", "BIRC6", "PDXP", "PKN2", "POU5F1", "PIN1", "AURKC", "KIAA1383", "PKP4")
597	CELLULAR RESPONSE TO ORGANIC NITROGEN%GO%GO:0071417	0.000179595	0.000892562	0.518848	0.283176	2.01725	124	c("SNCA", "SOCS2", "IGFBP5", "SFRP1", "JAK2", "CRHBP", "GNB3", "HDAC9", "APLP1", "FOXS1", "FGF1", "FGF18", "ATP6V1G2", "PIK3R1", "FOXC2", "RYR3", "PTPN11", "GNG11", "SOX9", "GRB10", "UBR1", "GAB1", "PDE3B", "GHR", "GNG2", "PRKAA2", "ADCY2", "TSC1", "FGF2", "HDAC5", "FGFR2", "MEF2C", "FGFR3", "CISH", "SORBS1", "FGF9", "BRCA1", "PRKAB2", "GCK", "PHIP", "PIK3R2", "STAT5B", "GPLD1", "IGF1R", "PDXP", …
598	STRIATED MUSCLE CELL DIFFERENTIATION%GO%GO:0051146	0.000180102	0.000893584	0.518848	0.451267	2.29943	32	c("MYOZ1", "LEF1", "MYH11", "CAPN3", "ANKRD1", "MYOCD", "SORT1", "IGF1", "CSRP3", "CBY1", "MEF2C", "OBSCN", "MYPN", "MESP1", "PROX1", "F2R", "FOXP1", "LRRK2", "MEF2A", "GATA4", "OBSL1", "SLC8A1", "VEGFA")
599	RHO GTPASE CYCLE%REACTOME%REACT_11051.1	0.000182482	0.000901125	0.518848	0.367935	2.13867	51	c("ARHGAP24", "RHOBTB1", "CHN1", "ARHGAP28", "NET1", "TIAM2", "ARHGEF3", "ARHGAP1", "ARHGAP19", "MCF2", "ARHGEF12", "RALBP1", "ARHGEF4", "CHN2", "KALRN", "AKAP13", "ARHGEF9", "SRGAP3", "OBSCN", "SOS2", "ARHGEF6", "RHOT2", "ARHGEF2", "ARHGDIG", "PIK3R2")
600	SIGNALING BY RHO GTPASES%REACTOME%REACT_11044.2	0.000182482	0.000901125	0.518848	0.367935	2.13867	51	c("ARHGAP24", "RHOBTB1", "CHN1", "ARHGAP28", "NET1", "TIAM2", "ARHGEF3", "ARHGAP1", "ARHGAP19", "MCF2", "ARHGEF12", "RALBP1", "ARHGEF4", "CHN2", "KALRN", "AKAP13", "ARHGEF9", "SRGAP3", "OBSCN", "SOS2", "ARHGEF6", "RHOT2", "ARHGEF2", "ARHGDIG", "PIK3R2")
601	ACTIN FILAMENT ORGANIZATION%GO%GO:0007015	0.000182533	0.000901125	0.518848	0.458783	2.25699	29	c("JAK2", "DPYSL3", "FSCN1", "EVL", "LIMA1", "GSN", "SPIRE1", "SHROOM2", "SHROOM1", "SORBS1", "ARHGEF2", "COBL", "PROX1", "JMY", "MICAL2", "ARRB1", "PDXP", "ABI2")
602	SYNAPSE PART%GO%GO:0044456	0.000186889	0.000921095	0.518848	0.38157	2.15033	46	c("MME", "SNCAIP", "AMPH", "CHRNA3", "BRSK1", "SIPA1L1", "DLG4", "SHANK1", "GRIA1", "P2RY1", "TMEM163", "FZD3", "CDK5", "ERC1", "SLC17A7", "NLGN1", "MAGEE1", "F2R", "GIPC1", "MAGI2", "TPRG1L", "SRGAP2", "SVOP", "PDLIM5", "TRPV1", "ERC2", "ACHE", "RGS14", "AAK1", "CACNG8", "DNM3", "CDK5R1", "CNIH2", "SRCIN1", "RIMS1", "CACNA1C", "SNAPIN", "MTMR2")
603	POSITIVE REGULATION OF CELL CYCLE PROCESS%GO%GO:0090068	0.000188142	0.000925734	0.518848	0.357576	2.16752	59	c("SOX4", "LEF1", "SOX15", "PKD2", "LRP5", "NUSAP1", "CRADD", "IGF1", "EDN3", "PPP1R1C", "TPR", "GATA6", "PKD1", "ATM", "PLCB1", "ID2", "UBB", "MAD2L1", "E2F8", "BRCA1", "CDKN1B", "KIF23", "PHIP", "DYNC1LI1", "PROX1", "TERF1", "PSMD10", "NPM2", "PSMB10", "IGF2", "PKN2", "NUDT16", "AKT1")
604	REGULATION OF DENDRITE MORPHOGENESIS%GO%GO:0048814	0.000190519	0.000935878	0.518848	0.540272	2.23092	18	c("CHRNA3", "SIPA1L1", "CAMK2B", "PTPRD", "TNIK", "SDC2", "SARM1", "CDK5", "RAP2A", "LRRK2", "PDLIM5", "CAPRIN1", "NGEF", "ACHE", "CAPRIN2", "CDK5R1", "SRCIN1", "RELN")
605	REGULATION OF DENDRITE DEVELOPMENT%GO%GO:0050773	0.000190884	0.000936118	0.518848	0.480078	2.23421	25	c("CHRNA3", "SIPA1L1", "CAMK2B", "PTPRD", "TNIK", "SDC2", "SARM1", "CDK5", "PACSIN1", "NLGN1", "COBL", "RAP2A", "LRRK2", "PDLIM5", "CAPRIN1", "NGEF", "ACHE", "BCL11A", "CAPRIN2", "CDK5R1", "DAB2IP", "SRCIN1", "RELN")
606	REGULATION OF IMMUNE EFFECTOR PROCESS%GO%GO:0002697	0.00019594	0.000959329	0.518848	0.36226	2.1374	54	c("PROS1", "CFH", "TNFRSF4", "TGFB2", "HERC5", "IFIT1", "TGFB3", "APOA1", "MASP1", "APOBEC3G", "RSAD2", "FYN", "PACS1", "APOBEC3F", "GAB2", "DDX60", "CD247", "TRPM4", "CADM1")
607	EYE DEVELOPMENT%GO%GO:0001654	0.000196356	0.000959782	0.518848	0.365404	2.16256	55	c("PROM1", "THY1", "TGFB2", "FOXS1", "DIXDC1", "SOX8", "NES", "FOXC2", "LRP5", "WNT2B", "SOX9", "WNT9A", "INHBA", "SMO", "BBS4", "BMPR2", "CEP290", "PTPRM", "SHROOM2", "TSPAN12", "NPHP1", "PPP2R3A", "PROX1", "HES5", "NKD1", "CHRDL1", "RAB3GAP1", "GPM6A", "FOXP2", "PAX6", "SMARCD3", "VEGFA", "NF1", "TWIST1")
608	REGULATION OF INTRACELLULAR PROTEIN TRANSPORT%GO%GO:0033157	0.000197608	0.000964315	0.518848	0.357083	2.16453	59	c("TMEM30B", "SOX4", "BMP4", "MDFIC", "XPO4", "TGFB3", "RAB23", "KANK1", "PKD2", "DACT3", "FZD7", "APOD", "BAMBI", "IGF1", "PTPN14", "TPR", "TCF7L2", "DACT1", "DYRK2", "PKD1", "MYO1C", "ASPH", "RBPMS", "SIRT1", "BMPR1A", "MDFI", "PSMD10", "GAS6", "POU5F1", "RBM22", "GOPC", "DMAP1", "DDX58", "NF1", "C1QTNF3", "GCC2", "UBR5", "MXI1", "KIAA0528", "DAB2IP", "TLR7")
609	EPITHELIAL CELL DIFFERENTIATION%GO%GO:0030855	0.000199749	0.000973159	0.518848	0.40374	2.23376	43	c("FZD2", "PROM1", "BMP4", "GATA5", "FZD1", "DACT2", "IRF6", "FZD7", "SMO", "GATA6", "BMPR2", "JAG1", "ID2", "FGFR2", "MEF2C", "MESP1", "PROX1", "TXNIP", "NFIB", "NPHS2", "MAGI2", "SPRR1B", "GATA4", "AKT1", "CTNNB1", "EDF1", "VEGFA", "GATA3")
610	POSITIVE REGULATION OF EPITHELIAL CELL PROLIFERATION%GO%GO:0050679	0.000200767	0.000976516	0.518848	0.411721	2.2019	39	c("THBS4", "HTR2B", "SFRP1", "BMP4", "SCG2", "SOX9", "FZD7", "HMGB2", "IGF1", "BMP6", "SMO", "NRP1", "THBS3", "BMPR2", "PRKD1", "FGF2", "FGFR2", "TNFSF12", "PROX1", "FOXP1", "PRKCA", "FOXP2", "CTNNB1", "AGGF1", "VEGFA", "VEGFB")
611	COLLAGEN%GO%GO:0005581	0.00020259	0.000983772	0.518848	0.495961	2.20782	22	c("COL14A1", "COL16A1", "LUM", "COL9A1", "COL9A2", "COL13A1", "COL8A1", "COL1A2", "COL7A1", "COL3A1", "COL19A1")
612	CELLULAR RESPONSE TO NITROGEN COMPOUND%GO%GO:1901699	0.000204349	0.000990694	0.518848	0.279165	1.99561	128	c("SNCA", "SOCS2", "IGFBP5", "SFRP1", "JAK2", "CRHBP", "GNB3", "HDAC9", "APLP1", "IFIT1", "FOXS1", "FGF1", "FGF18", "ATP6V1G2", "PIK3R1", "FOXC2", "RYR3", "PTPN11", "GNG11", "SOX9", "GRB10", "UBR1", "GAB1", "PDE3B", "GHR", "GNG2", "PRKAA2", "ADCY2", "TSC1", "FGF2", "HDAC5", "FGFR2", "MEF2C", "FGFR3", "CISH", "SORBS1", "FGF9", "BRCA1", "PRKAB2", "GCK", "PHIP", "PIK3R2", "STAT5B", "GPLD1", "IGF1R",…
613	ION CHANNEL ACTIVITY%GO%GO:0005216	0.000204953	0.000990917	0.518848	0.296958	2.01104	95	c("KCNA5", "GRIA3", "HTR2B", "SCN2B", "KCNT2", "KCNE1", "KCNMA1", "CHRNA3", "GLRB", "KCNS3", "SCN3B", "SCN4B", "KCNA4", "PKD2", "KCNC4", "KCNK6", "RYR3", "PKD1L1", "KCNMB4", "CACNA2D1", "TPCN1", "KCNMB2", "GRIA1", "TRPM4", "PKD1", "GRIK4", "SHROOM2", "KCNK17", "KCNS1", "ITPR1", "SCN3A", "LOXHD1", "CACNA1D", "HCN2", "P2RX7", "ZP3", "GAS6", "ANO1", "TRPC1", "REST", "STIM2")
614	REGULATION OF RHO PROTEIN SIGNAL TRANSDUCTION%GO%GO:0035023	0.000205063	0.000990917	0.518848	0.41352	2.19365	38	c("EPHA3", "SFRP1", "APOE", "AGRN", "NTRK2", "APOA1", "KANK1", "NET1", "EPHB3", "RALBP1", "ALS2", "FGD5", "TSC1", "TAX1BP3", "ARHGEF2", "F2R", "EPHA5", "PLXNB2", "ARRB1", "FGD6", "ARHGAP29", "SRGAP2", "TBC1D7")
615	REGULATION OF SMOOTH MUSCLE CELL PROLIFERATION%GO%GO:0048660	0.000206962	0.000998464	0.518848	0.545546	2.19982	17	c("OGN", "IGFBP5", "BMP4", "IGFBP3", "APOD", "IGF1", "TCF7L2", "MFN2", "CCL5", "ID2", "HES5")
616	ENVELOPE%GO%GO:0031975	0.000207662	0.000998596	0.518848	0.239621	1.86399	215	c("GATM", "PPP2R2B", "SPATA18", "PAK1", "ATP1B4", "CCND2", "S100A6", "BCL2", "RSAD2", "SCRN1", "UCP2", "PRICKLE1", "LTC4S", "ATPIF1", "CPT2", "SLC22A18", "TPR", "CPT1B", "OMA1", "BCL2L11", "NNT", "MFN2", "NUP188", "TMEM18", "MGST3", "NDUFA11", "MAD2L1", "L2HGDH", "GK2", "SLC25A11", "PTGER3", "WHSC1", "SIRT1", "DNAJC2", "BMF", "NUP37", "RHOT2", "ACAD11", "MRPL19", "NDUFB7", "CYB5A", "MYO6", "NDUFA…
617	ORGANELLE ENVELOPE%GO%GO:0031967	0.000207662	0.000998596	0.518848	0.239621	1.86399	215	c("GATM", "PPP2R2B", "SPATA18", "PAK1", "ATP1B4", "CCND2", "S100A6", "BCL2", "RSAD2", "SCRN1", "UCP2", "PRICKLE1", "LTC4S", "ATPIF1", "CPT2", "SLC22A18", "TPR", "CPT1B", "OMA1", "BCL2L11", "NNT", "MFN2", "NUP188", "TMEM18", "MGST3", "NDUFA11", "MAD2L1", "L2HGDH", "GK2", "SLC25A11", "PTGER3", "WHSC1", "SIRT1", "DNAJC2", "BMF", "NUP37", "RHOT2", "ACAD11", "MRPL19", "NDUFB7", "CYB5A", "MYO6", "NDUFA…
618	STRIATED MUSCLE TISSUE DEVELOPMENT%GO%GO:0014706	0.000208203	0.000999577	0.518848	0.39295	2.20529	45	c("TGFB2", "FOXS1", "MYH11", "ANKRD1", "FOXC2", "SVIL", "MYOCD", "TNNI3", "SORT1", "IGF1", "CSRP3", "CBY1", "FGFR2", "MEF2C", "MESP1", "PROX1", "F2R", "SMAD7", "MYL6B", "FOXP1", "PKP2", "LRRK2", "MEF2A", "GATA4", "RYR2", "FOXP2", "OBSL1", "SLC8A1", "VEGFA", "ZFPM2")
619	NEURONAL CELL BODY%GO%GO:0043025	0.000212689	0.0010182	0.518848	0.440031	2.20222	31	c("SNCAIP", "APOE", "CRHBP", "TGFB2", "CHRNA3", "DIXDC1", "EFHC1", "GRIA1", "APOD", "SMO", "NCDN", "FZD3", "CDK5", "SLC38A7", "COBL", "SRR", "EPHA5", "LRRK2", "FRMD7")
620	REGULATION OF PROTEOLYSIS%GO%GO:0030162	0.000212769	0.0010182	0.518848	0.360566	2.1274	54	c("SERPINE2", "APOE", "SERPINI1", "PLAT", "LTBP4", "CAPN3", "PTPN3", "SERPINF1", "PRICKLE1", "PERP", "BTRC", "PLK3", "CLU", "PACSIN3", "ASPH", "FBXW11", "TAF1", "MAD2L1", "PSMD10", "SMAD7", "SH3D19", "PIAS1", "COMMD1", "NELL1", "GPLD1", "GIPC1", "LRRK2", "NUB1", "FBXW7", "AKT1", "FHIT")
621	GLYCOSAMINOGLYCAN BIOSYNTHETIC PROCESS%GO%GO:0006024	0.000215508	0.00102965	0.518848	0.392497	2.20275	45	c("FMOD", "OGN", "LUM", "OMD", "AGRN", "CHST6", "CHSY3", "PRELP", "GPC6", "B3GNT2", "EXT1", "HAS3", "ST3GAL3", "SDC2", "CSPG5", "CHST14", "GLCE", "HS2ST1", "ST3GAL6", "GPC1", "HSPG2")
622	MICROTUBULE-BASED PROCESS%GO%GO:0007017	0.000220999	0.00105419	0.518848	0.283254	1.99776	116	c("CENPA", "KIF1A", "NDC80", "AP3M2", "TPPP3", "BRSK1", "MAP4", "PKD2", "KIF13A", "MID1", "FYCO1", "PLK2", "NUSAP1", "FGF13", "ATXN3", "BICD1", "KIF3C", "CETN3", "CEP68", "STMN1", "SPIRE1", "CNTROB", "LRRC6", "BBS4", "PEX1", "ARHGAP21", "KIF5B", "DST", "NPHP3", "PRC1", "TTLL3", "CDK5RAP2", "CROCC", "CLASP1", "MAPT", "KIF23", "KIF15", "RHOT2", "CEP72", "DYNC1H1", "APP", "TUBGCP5", "KLC1", "BBS2", …
623	POSITIVE REGULATION OF GROWTH%GO%GO:0045927	0.000222287	0.00105863	0.518848	0.399791	2.18456	41	c("SFRP1", "AGRN", "LEF1", "TGFB2", "FOXS1", "BCL2", "SOX15", "CAPN3", "N6AMT1", "LGI1", "PPP1R1C", "GHR", "PLCB1", "SFRP2", "FGFR1OP", "ISLR2", "NLGN4X", "MAPT", "PROX1", "PSMD10", "ZP3", "NACA", "TWF2", "AKT1", "NOL8")
624	TRANSMEMBRANE TRANSPORT OF SMALL MOLECULES%REACTOME%REACT_15518.2	0.000223549	0.00106293	0.518848	0.239909	1.85648	209	c("SLC26A4", "SLC30A2", "ABCG2", "SLC1A7", "SLC6A1", "SLC44A5", "HEPH", "GNB3", "SLC27A6", "GLRB", "GABRB1", "ABCC8", "CYBRD1", "ATP6V1G2", "APOA1", "ATP1B2", "SLC47A1", "SLC40A1", "SLC9A5", "MYO5B", "SLC30A1", "RYR3", "SLC5A7", "SLC16A7", "SLC44A1", "GNG11", "SLC4A8", "TPCN1", "SLC2A10", "SLC35A1", "SLC22A18", "TPR", "SLC6A12", "SLC24A3", "ATP7B", "SLC13A4", "ARHGEF9", "GNG2", "ADCY2", "SLC2A12"…
625	MEMBRANE DEPOLARIZATION%GO%GO:0051899	0.000225634	0.00107013	0.518848	0.495917	2.24411	23	c("SCN2B", "KCNE1", "CHRNA3", "SCN3B", "SCN4B", "DLG4", "SHANK1", "CACNA1B", "NLGN4X", "CAV3", "CACNA1D", "NLGN1", "P2RX7", "SMAD7", "NLGN3")
626	CELLULAR METAL ION HOMEOSTASIS%GO%GO:0006875	0.000225783	0.00107013	0.518848	0.323586	2.10411	78	c("HTR2B", "PLCE1", "ABCG2", "EDNRA", "DRD4", "HEPH", "KCNMA1", "CYBRD1", "ATP6V1G2", "CYSLTR1", "CDH23", "SLC40A1", "PKD2", "SLC30A1", "PDE6A", "EPHX2", "TNNI3", "P2RY1", "ATP7B", "CSRP3", "CCL5", "PDE6B", "FGF2", "RGN", "CAV3", "ITPR1", "SLC22A17", "ATP2C1", "F2R", "NEDD4L", "TRPC1", "STIM2", "ATP6V1E2", "IBTK", "VAPB", "BBC3", "RYR2", "CP", "ATP6V1B1", "SRI", "FTH1", "SLC8A1", "ATP6V1D", "CASQ…
627	SMALL MOLECULE BINDING%GO%GO:0036094	0.00022786	0.00107825	0.518848	0.239242	1.87441	224	c("PDE5A", "ALDH1A2", "STK38L", "NOX4", "CRYM", "ICK", "BRSK1", "APOA1", "MYH10", "SNRK", "SCG5", "PIF1", "RAB26", "CBR3", "PDK3", "TNIK", "TSSK6", "HPGD", "TP53I3", "APOD", "OSBPL7", "CBR4", "GAL3ST3", "HSPA4L", "LMTK2", "MAP4K4", "CAMK2G", "GNAI1", "NRBP2", "ATP7B", "MSH2", "BDH2", "DYRK2", "OSBP2", "NNT", "SRPK3", "PEX1", "GEM", "MCM4", "NLRP1", "ZAP70", "OSBPL2", "TLK1", "OSBPL10", "ABCA2", "…
628	POSITIVE REGULATION OF ORGANELLE ORGANIZATION%GO%GO:0010638	0.000228831	0.00108112	0.518848	0.3269	2.10169	74	c("SFRP1", "HRK", "PAK1", "TNFSF10", "MLLT11", "NES", "LRP5", "NUSAP1", "AMOT", "IGF1", "EDN3", "TPR", "DNMT3B", "NTF3", "BCL2L11", "CAV3", "CDK5", "FAM162A", "BRCA1", "PPARGC1A", "MAPT", "BMF", "PHF1", "SYNPO", "P2RX7", "PHIP", "MFF", "PROX1", "TERF1", "JMY", "TNKS", "ARRB1", "BRD7", "PDXP", "IGF2", "PPM1E", "FHOD1")
629	HEART MORPHOGENESIS%GO%GO:0003007	0.000231222	0.00109068	0.518848	0.35798	2.16182	58	c("HTR2B", "SOX4", "BMP4", "CPE", "TGFB2", "FOXS1", "PKD2", "ANKRD1", "FOXC2", "SOX9", "TNNI3", "SMO", "GATA6", "BBS4", "STIL", "SFRP2", "BAZ1B", "JAG1", "NPHP3", "FGFR2", "DVL2", "MEF2C", "DVL3", "BMPR1A", "MESP1", "PROX1", "SMAD7", "PKP2", "HAND2", "GATA4", "RYR2", "SETDB2", "VEGFA", "GATA3", "ZFPM2")
630	HORMONE BINDING%GO%GO:0042562	0.000232455	0.00109475	0.518848	0.525928	2.21587	19	c("NPR3", "CRHBP", "CRYM", "PIK3R1", "ALDH1A1", "INHBA", "AMHR2", "GHR", "THRA", "LHCGR", "AR")
631	REGIONALIZATION%GO%GO:0003002	0.000234235	0.00110139	0.518848	0.380988	2.18708	49	c("SFRP1", "BMP4", "LEF1", "FOXS1", "PCSK5", "FOXC2", "PKD1L1", "LRP5", "WNT2B", "CXXC4", "WNT9A", "CYP26B1", "SMO", "DDIT3", "BMPR2", "DUSP6", "FGFR2", "TBX3", "DVL2", "MEF2C", "MDFI", "COBL", "PPP2R3A", "MESP1", "HHEX", "NBL1", "GATA4", "CTNNB1", "SMAD6", "SETDB2")
632	SEMAPHORIN INTERACTIONS%REACTOME%REACT_19271.1	0.00023619	0.00110882	0.518848	0.494987	2.2399	23	c("DPYSL3", "PAK1", "MYH11", "MYH10", "FYN", "SEMA6A", "ARHGEF12", "SEMA5A", "NRP1", "SEMA6D", "DPYSL4", "RRAS", "CDK5", "ROCK1", "MYL9")
633	ESTABLISHMENT OF PROTEIN LOCALIZATION%GO%GO:0045184	0.00023972	0.00112362	0.518848	0.245491	1.86594	184	c("JAK2", "TGFB2", "IFIT1", "RASSF9", "SCG2", "ATP6V1G2", "PCSK5", "COPZ2", "KIF13A", "RPS4Y1", "SCG5", "PACS1", "S100A13", "PRICKLE1", "RAB26", "CLIP3", "PPP1R10", "SPTBN1", "DLG4", "RTP4", "BTN3A1", "RAMP2", "ANK1", "COG7", "TPR", "LMTK2", "PEX7", "CEP57", "BBS1", "PKD1", "CEP290", "MFN2", "LRP1B", "TRAK1", "PEX1", "VPS45", "TLK1", "SNX16", "MACF1", "SNX1", "MYO1C", "DUSP16", "RPL31", "PEX6", "…
634	CATION CHANNEL ACTIVITY%GO%GO:0005261	0.000242434	0.00113455	0.518848	0.329778	2.13993	77	c("KCNA5", "HTR2B", "SCN2B", "KCNT2", "KCNE1", "KCNMA1", "CHRNA3", "KCNS3", "SCN3B", "SCN4B", "KCNA4", "PKD2", "KCNC4", "KCNK6", "RYR3", "PKD1L1", "KCNMB4", "CACNA2D1", "TPCN1", "KCNMB2", "TRPM4", "PKD1", "SHROOM2", "KCNK17", "KCNS1", "ITPR1", "SCN3A", "LOXHD1", "CACNA1D", "HCN2", "P2RX7", "ZP3", "GAS6", "TRPC1", "REST", "STIM2")
635	DETECTION OF EXTERNAL STIMULUS%GO%GO:0009581	0.000243567	0.00113805	0.518848	0.542647	2.18814	17	c("KIT", "ELOVL4", "PLEKHB1", "PKD2", "PKD1L1", "HLA-DRB1", "PKD1", "CSRP3", "PDE6B", "LOXHD1", "ABCA4")
636	ENDOPLASMIC RETICULUM PART%GO%GO:0044432	0.000244042	0.00113848	0.518848	0.243758	1.88373	208	c("COL14A1", "PROS1", "COL16A1", "COL10A1", "COL9A1", "PDGFD", "COL21A1", "TM7SF2", "ARSJ", "GSTM5", "ORMDL3", "COL9A2", "FMO3", "COL13A1", "ELOVL4", "CYP2J2", "COL8A1", "COL24A1", "COL1A2", "APOA1", "RSAD2", "LEPREL1", "PKD2", "EXT1", "KDELR3", "COL7A1", "RYR3", "COL8A2", "LEPREL2", "AGPAT4", "HLA-DRB5", "OSBPL7", "HLA-DRB1", "COL3A1", "ARSD", "COL4A3BP", "MBOAT2", "CYP46A1", "FMO2", "CYP26B1", …
637	REGULATION OF SMOOTHENED SIGNALING PATHWAY%GO%GO:0008589	0.000249198	0.00116071	0.498493	0.541508	2.18354	17	c("SFRP1", "EVC", "GLI1", "INTU", "WNT9A", "BTRC", "SMO", "KIF7", "FGFR2", "STK36", "PTCH2")
638	POSITIVE REGULATION OF PROTEIN CATABOLIC PROCESS%GO%GO:0045732	0.000251748	0.00117075	0.498493	0.428724	2.21182	34	c("APOE", "ASB9", "PRICKLE1", "OSBPL7", "PLK3", "DACT1", "CLU", "PACSIN3", "TAF1", "VIP", "CDKN1B", "PPP2R3A", "APC", "PSMD10", "SMAD7", "SH3D19", "PIAS1", "NKD1", "GPLD1", "LRRK2", "NUB1", "FZR1", "SUMO1", "C5ORF41", "TRIM32", "DAB2IP", "TRIB2")
639	TRANSCRIPTION COACTIVATOR ACTIVITY%GO%GO:0003713	0.000260856	0.0012112	0.498493	0.286526	2.00414	112	c("SOX4", "PRRX1", "PRMT2", "DYRK1B", "ZEB1", "ANKRD1", "NR2F1", "ING4", "SP4", "MKL2", "PSMC3IP", "SMARCA2", "PSIP1", "RNF20", "GABPA", "SUB1", "ZSCAN1", "MED30", "SUPT3H", "SMARCC2", "FGF2", "TAF1", "DDX17", "SS18", "PIAS2", "BRCA1", "PPARGC1A", "RBPMS", "SMARCE1", "SETD3", "KLF7", "EP300", "MED12", "NCOA2", "MAML2", "SRA1", "NFYC", "NPAT", "PPARGC1B", "CREM", "PIAS1", "SP100", "JMY", "NACA", "…
640	PHOSPHOLIPID BIOSYNTHETIC PROCESS%GO%GO:0008654	0.000261533	0.00121245	0.498493	0.332546	2.13224	73	c("HTR2B", "SLC44A5", "APOA1", "INPP4B", "PIK3R1", "SLC44A1", "AGPAT4", "PIK3C2B", "MBOAT2", "PLA2G4C", "AGPAT9", "PIP4K2B", "ATM", "MTMR4", "FGF2", "LCAT", "PGAP1", "PIGK", "MPPE1", "PIGM", "SLC27A1", "PIGZ", "PIGP", "DPM3", "DPM1", "PIK3R2", "SYNJ2", "CDS2", "MTMR14", "PIK3C3", "CHKB", "PIK3CG", "GPAM", "PIGV", "AGPAT1", "MTMR3", "SLC44A2", "SAMD8", "AGPAT2", "MTM1", "PNPLA2", "PHOSPHO1", "PIK3…
641	NEGATIVE REGULATION OF HYDROLASE ACTIVITY%GO%GO:0051346	0.000264063	0.00122227	0.498493	0.317938	2.08653	81	c("SERPINE2", "SNCA", "PROS1", "SYTL2", "SFRP1", "FARP1", "SERPINI1", "MYO1D", "LEF1", "TGFB2", "IFIT1", "RECK", "SERPINF1", "KIAA1244", "MAP2K5", "GZMA", "TNNI3", "ATPIF1", "SORT1", "BICD1", "LMTK3", "CRY2", "SIAH2", "PLA2R1", "SPINT2", "VTN", "ZCCHC9", "ITIH4", "SIRT1", "CCDC8", "RBM26", "FNIP1", "APOC1", "KIAA0430", "GAS6", "LRRK2", "PZP", "ZFYVE1", "AKT1", "OXA1L", "MPHOSPH10")
642	REGULATION OF HORMONE SECRETION%GO%GO:0046883	0.000265886	0.0012275	0.498493	0.378744	2.17419	49	c("KCNA5", "SOX4", "SFRP1", "CRHBP", "CACNA2D2", "KCNS3", "ABCC8", "SCG5", "LRP5", "MARCKS", "MYRIP", "INHBA", "HLA-DRB1", "EDN3", "TCF7L2", "GDF9", "ITPR1", "SIRT4", "GCK", "CACNA1D", "EPHA5", "GPLD1", "REST", "SLC25A5", "RAP1A", "PRKCA", "GLUD1", "PRKAR1B", "VAMP2")
643	HYDROLASE ACTIVITY, ACTING ON ACID ANHYDRIDES%GO%GO:0016817	0.000266849	0.0012275	0.498493	0.237886	1.83717	207	c("ENPP2", "KIF1A", "ABCG2", "TNNT3", "GNB3", "RAB23", "CILP", "MYL7", "MYH10", "ATP1B2", "KIF13A", "MYO5B", "PIF1", "DNALI1", "GNG11", "MYO10", "RECQL", "DNAH1", "KIF3C", "SMARCA2", "RALBP1", "DYNC2H1", "GNAI1", "ATP7B", "BBS4", "MSH2", "RND3", "KIF20B", "ABCB4", "PEX1", "GEM", "MCM4", "RAB33A", "DUT", "KIF5B", "KIF7", "PMS1", "MACF1", "CLU", "ABCA2", "RRAS", "RAB28", "DDX17", "DCP2", "ATP1A2", …
644	HYDROLASE ACTIVITY, ACTING ON ACID ANHYDRIDES, IN PHOSPHORUS-CONTAINING ANHYDRIDES%GO%GO:0016818	0.000266849	0.0012275	0.498493	0.237886	1.83717	207	c("ENPP2", "KIF1A", "ABCG2", "TNNT3", "GNB3", "RAB23", "CILP", "MYL7", "MYH10", "ATP1B2", "KIF13A", "MYO5B", "PIF1", "DNALI1", "GNG11", "MYO10", "RECQL", "DNAH1", "KIF3C", "SMARCA2", "RALBP1", "DYNC2H1", "GNAI1", "ATP7B", "BBS4", "MSH2", "RND3", "KIF20B", "ABCB4", "PEX1", "GEM", "MCM4", "RAB33A", "DUT", "KIF5B", "KIF7", "PMS1", "MACF1", "CLU", "ABCA2", "RRAS", "RAB28", "DDX17", "DCP2", "ATP1A2", …
645	PYROPHOSPHATASE ACTIVITY%GO%GO:0016462	0.000266849	0.0012275	0.498493	0.237886	1.83717	207	c("ENPP2", "KIF1A", "ABCG2", "TNNT3", "GNB3", "RAB23", "CILP", "MYL7", "MYH10", "ATP1B2", "KIF13A", "MYO5B", "PIF1", "DNALI1", "GNG11", "MYO10", "RECQL", "DNAH1", "KIF3C", "SMARCA2", "RALBP1", "DYNC2H1", "GNAI1", "ATP7B", "BBS4", "MSH2", "RND3", "KIF20B", "ABCB4", "PEX1", "GEM", "MCM4", "RAB33A", "DUT", "KIF5B", "KIF7", "PMS1", "MACF1", "CLU", "ABCA2", "RRAS", "RAB28", "DDX17", "DCP2", "ATP1A2", …
646	NEGATIVE REGULATION OF PHOSPHATE METABOLIC PROCESS%GO%GO:0045936	0.000269012	0.00123363	0.498493	0.303677	2.03746	92	c("THY1", "SFRP1", "BMP4", "UCHL1", "RGS4", "APOE", "STK38L", "IGFBP3", "DRD4", "APLP1", "MYOCD", "LRP5", "CNKSR3", "INHBA", "FAM129A", "SOCS4", "DYNLL1", "NTF3", "CDKN2B", "DUSP6", "SFRP2", "FGFR1OP", "TP73", "DUSP16", "CAV3", "SLC27A1", "CDKN1B", "SIRT1", "GRM8", "DUSP8", "APOC1", "APC", "GABBR1", "CDKN2C", "PARK2", "SMAD7", "ZNF675", "RGS3", "IGF1R", "DMD", "PPM1E", "HEXIM2", "IBTK", "PRKCA", …
647	NEGATIVE REGULATION OF PHOSPHORUS METABOLIC PROCESS%GO%GO:0010563	0.000269012	0.00123363	0.498493	0.303677	2.03746	92	c("THY1", "SFRP1", "BMP4", "UCHL1", "RGS4", "APOE", "STK38L", "IGFBP3", "DRD4", "APLP1", "MYOCD", "LRP5", "CNKSR3", "INHBA", "FAM129A", "SOCS4", "DYNLL1", "NTF3", "CDKN2B", "DUSP6", "SFRP2", "FGFR1OP", "TP73", "DUSP16", "CAV3", "SLC27A1", "CDKN1B", "SIRT1", "GRM8", "DUSP8", "APOC1", "APC", "GABBR1", "CDKN2C", "PARK2", "SMAD7", "ZNF675", "RGS3", "IGF1R", "DMD", "PPM1E", "HEXIM2", "IBTK", "PRKCA", …
648	RESPONSE TO RADIATION%GO%GO:0009314	0.000270399	0.00123634	0.498493	0.331418	2.14605	76	c("MME", "CCND1", "SCARA3", "GADD45A", "ELOVL4", "PLEKHB1", "BRSK1", "BCL2", "CRIP1", "NET1", "EYA1", "COL3A1", "CRY2", "PLK3", "MSH2", "ATM", "PDE6B", "SLC24A1", "ERCC5", "TP73", "BRCA1", "SIRT1", "USP28", "ABCA4", "NPHP1", "FECH", "APP", "CAT", "DDB2", "CLOCK", "ERCC6", "ERCC2", "STK11", "RBM4B", "RAD9A", "FBXW7", "TMEM161A", "AKT1", "REV1", "XRRA1", "NF1", "PPID", "RPAIN", "RGS14", "UBE4B", "T…
649	POSITIVE REGULATION OF PROTEIN TRANSPORT%GO%GO:0051222	0.000270436	0.00123634	0.498493	0.345599	2.11236	62	c("HTR2B", "TMEM30B", "TNFRSF4", "BMP4", "TGFB2", "XPO4", "TGFB3", "KANK1", "ANKRD1", "IL33", "SCAMP5", "BAMBI", "IGF1", "BMP6", "TPR", "TCF7L2", "CADM1", "DACT1", "PTGER4", "NLRP1", "MYO1C", "ASPH", "RBPMS", "BMPR1A", "P2RX7", "F2R", "GAS6", "POU5F1", "CLEC9A", "RBM22", "DMAP1", "C5ORF41", "DDX58", "GATA3", "C1QTNF3", "PPID", "TWIST1", "ACHE", "UBR5", "KIAA0528", "PRKCZ", "TLR7", "C5", "TNF", "J…
650	CELL CORTEX%GO%GO:0005938	0.000271157	0.00123661	0.498493	0.41483	2.16386	35	c("SNCA", "PLEKHH2", "DIXDC1", "MYH10", "PKD2", "DLG4", "SPTAN1", "SPIRE1", "LLGL1", "TSC1", "SHROOM2", "FGFR2", "DVL2", "ASPH", "DVL3", "CLASP1", "COBL", "MYO6", "GCOM1", "GIPC1", "CTNNB1", "LANCL2")
651	REGULATION OF MITOCHONDRION ORGANIZATION%GO%GO:0010821	0.000271328	0.00123661	0.498493	0.502365	2.19768	21	c("HRK", "TNFSF10", "MLLT11", "IGF1", "OMA1", "BCL2L11", "FAM162A", "PPARGC1A", "BMF", "MFF", "PARK2", "PSMD10", "SLC25A5", "AKT1", "BBC3", "OPA1")
652	BINDING, BRIDGING%GO%GO:0060090	0.000273594	0.00124449	0.498493	0.360338	2.13257	55	c("COL14A1", "SOCS2", "CHN1", "COL1A2", "FLRT2", "SORBS2", "PIK3R1", "ARHGAP1", "COL8A2", "PTPN11", "GAB2", "CRADD", "SHB", "BICD1", "GAB1", "ANK1", "CHN2", "SH3BGR", "COL19A1", "STAM", "MAPK8IP1", "SORBS1", "SH3BGRL", "LDLRAP1", "GAS6", "ABI2", "KHDRBS1", "SPRR1B", "HOMER1", "TIRAP", "OBSL1", "ST13")
653	P75 NTR RECEPTOR-MEDIATED SIGNALLING%REACTOME%REACT_13776.1	0.000273896	0.00124449	0.498493	0.434613	2.1751	31	c("NET1", "TIAM2", "ARHGEF3", "MCF2", "ARHGEF12", "ARHGEF4", "BCL2L11", "KALRN", "AKAP13", "ARHGEF9", "UBB", "OBSCN", "SOS2", "ARHGEF6", "ARHGEF2", "LINGO1", "HDAC3", "SQSTM1", "TRAF6", "UBC", "NGEF", "ARHGEF11", "HDAC2", "ABR")
654	TGF-beta signaling pathway%KEGG%hsa04350	0.000275348	0.00124917	0.498493	0.371527	2.12625	48	c("THBS4", "COMP", "BMP4", "LEFTY2", "THBS2", "TGFB2", "TGFB3", "SMAD9", "INHBA", "BMP6", "INHBE", "AMHR2", "THBS3", "CDKN2B", "PPP2R1B", "ID4", "BMPR2", "ID2", "BMPR1A", "EP300", "SMAD7", "ROCK1", "SMAD5", "RBX1", "BMP8B", "SMAD6", "RBL2", "RPS6KB1", "RBL1", "PPP2R1A", "LTBP1", "PPP2CA", "FST", "ACVR2A", "GDF6", "TNF", "SMAD4")
655	BIOCARTA_ALK_PATHWAY%MSIGDB_C2%BIOCARTA_ALK_PATHWAY	0.000276701	0.00125339	0.498493	0.501366	2.19331	21	c("BMP4", "NPPA", "TGFB2", "TGFB3", "NPPB", "FZD1", "BMPR2", "MEF2C", "BMPR1A", "APC", "SMAD5", "MAP3K7", "GATA4", "CTNNB1", "SMAD6", "ATF2", "RFC1")
656	PROTEIN CATABOLIC PROCESS%GO%GO:0030163	0.000277637	0.00125572	0.498493	0.281657	2.02284	132	c("SPATA18", "ACE2", "HERC5", "ACE", "ENC1", "HECW2", "UBE2H", "HERC6", "FBXL14", "RNF103", "RNF217", "GZMA", "BTRC", "ATXN3", "DDIT3", "HECTD2", "FBXO8", "RNF20", "OMA1", "SIAH2", "FBXO4", "FBXO31", "TBL1XR1", "RNF146", "CRBN", "WWP2", "ANAPC10", "FBXW11", "UBB", "SKP2", "MAD2L1", "GPC1", "FBXO21", "UBE2D1", "SIRT1", "NFE2L2", "UBE2W", "FOXRED2", "TTC3", "TMEM67", "RAB12", "BNIP3L", "ATE1", "FBX…
657	NEGATIVE REGULATION OF CANONICAL WNT RECEPTOR SIGNALING PATHWAY%GO%GO:0090090	0.000278815	0.00125913	0.498493	0.413225	2.19014	37	c("SFRP4", "FRZB", "SFRP1", "DKK2", "LEF1", "GLI1", "PRICKLE1", "FZD1", "SOX9", "DDIT3", "SIAH2", "TCF7L2", "FZD6", "SFRP2", "NPHP3", "PPP2R3A", "APC", "MESP1", "NKD1", "DKK3")
658	TRANSPORT OF GLUCOSE AND OTHER SUGARS, BILE SALTS AND ORGANIC ACIDS, METAL IONS AND AMINE COMPOUNDS%REACTOME%REACT_19305.2	0.000288797	0.00130222	0.498493	0.394024	2.16083	42	c("SLC30A2", "SLC6A1", "SLC44A5", "HEPH", "SLC47A1", "SLC40A1", "SLC30A1", "SLC5A7", "SLC16A7", "SLC44A1", "SLC2A10", "SLC22A18", "SLC6A12", "SLC13A4", "SLC2A12", "SLC2A11", "SLC14A1", "SLC6A13", "SLC6A19", "SLC6A2", "SLC6A15", "SLC44A2", "CP", "SLC41A1", "SLC16A8", "SLC47A2")
659	MONOVALENT INORGANIC CATION TRANSMEMBRANE TRANSPORTER ACTIVITY%GO%GO:0015077	0.000290708	0.00130885	0.498493	0.332528	2.10641	70	c("KCNA5", "SCN2B", "KCNT2", "KCNE1", "KCNMA1", "ATP1B4", "KCNS3", "ABCC8", "SCN3B", "SCN4B", "ATP1B2", "KCNA4", "PKD2", "KCNC4", "KCNK6", "KCNMB4", "SLC5A7", "KCNMB2", "ATP5S", "NNT", "SLC13A4", "SLC24A1", "SHROOM2", "KCNK17", "KCNS1", "ATP1A2", "SLC17A7", "SCN3A", "CYB5A", "COX15", "SLC4A4", "REST", "SLC6A2")
660	ESTABLISHMENT OF ORGANELLE LOCALIZATION%GO%GO:0051656	0.000292405	0.00131449	0.498493	0.42577	2.19658	34	c("CENPA", "NDC80", "MAP4", "LRMP", "NUSAP1", "SPIRE1", "BBS4", "SEC31A", "ARHGAP21", "SNAP23", "SHROOM2", "KLHL12", "WIPI1", "CDK5RAP2", "CLASP1", "RHOT2", "NLGN1", "SYNE2", "BBS2")
661	REGULATION OF HORMONE LEVELS%GO%GO:0010817	0.00029324	0.00131625	0.498493	0.404603	2.16382	39	c("DIO2", "ALDH1A2", "ACE2", "CRYM", "LTBP4", "ACE", "PCSK5", "SOX8", "SCG5", "CYP11A1", "INHBA", "EDN3", "CYP26B1", "CAMK2G", "HSD17B8", "SRD5A1", "TBX3", "CHST8")
662	REGULATION OF APOPTOTIC SIGNALING PATHWAY%GO%GO:2001233	0.000297159	0.0013293	0.498493	0.435488	2.2286	33	c("JAK2", "HRK", "BCL2", "TNFSF10", "MLLT11", "UNC5B", "IGF1", "SIAH2", "PPP2R1B", "BCL2L11", "CLU", "ZMYND11", "FAM162A", "BMF", "TNFSF12", "MFF", "PARK2", "PSMD10", "SLC25A5", "AKT1", "BBC3", "OPA1")
663	AMINOGLYCAN CATABOLIC PROCESS%GO%GO:0006026	0.00029749	0.0013293	0.498493	0.4248	2.19157	34	c("FMOD", "OGN", "LUM", "OMD", "AGRN", "PRELP", "GPC6", "SDC2", "CSPG5", "HEXB", "IDS", "FGF2", "HEXA", "FUCA1", "GPC1", "IDUA", "HSPG2")
664	GLYCOSAMINOGLYCAN CATABOLIC PROCESS%GO%GO:0006027	0.00029749	0.0013293	0.498493	0.4248	2.19157	34	c("FMOD", "OGN", "LUM", "OMD", "AGRN", "PRELP", "GPC6", "SDC2", "CSPG5", "HEXB", "IDS", "FGF2", "HEXA", "FUCA1", "GPC1", "IDUA", "HSPG2")
665	TUBE FORMATION%GO%GO:0035148	0.000299071	0.00133435	0.498493	0.527284	2.17729	18	c("SOX4", "SOX8", "PRICKLE1", "SOX9", "BBS4", "STIL", "FZD6", "FZD3", "DVL2", "COBL", "PLXNB2", "CTNNB1", "VEGFA", "GATA3", "SDCCAG8", "DAB2IP", "DEAF1")
666	BETA-CATENIN BINDING%GO%GO:0008013	0.000299681	0.00133507	0.498493	0.470698	2.1596	24	c("ESR1", "LEF1", "KANK1", "DACT2", "TCF7L2", "DACT1", "TBL1XR1", "CBY1", "SHROOM2", "AR", "DVL3", "EP300", "APC", "SMAD7", "VCL", "DLG5", "PTPRT", "CALCOCO1", "CDH2", "CDH24", "CHD8")
667	POSITIVE REGULATION OF PROTEIN SERINE/THREONINE KINASE ACTIVITY%GO%GO:0071902	0.000301097	0.00133936	0.498493	0.343463	2.13106	65	c("HTR2B", "PLCE1", "KIT", "SNCA", "CCND1", "MDFIC", "DRD4", "PAK1", "CCND2", "TPD52L1", "PKD2", "CXCR4", "MAP2K5", "EDN3", "GHR", "ALS2", "NTF3", "PKD1", "ADORA2B", "FGF2", "DVL2", "UBB", "DVL3", "SIRT1", "S1PR2", "MAPK10", "PROX1", "PSMD10", "LRRK2", "IGF2", "PIK3CG", "TRAF6", "MAP3K7", "AKT1")
668	DEFENSE RESPONSE%GO%GO:0006952	0.000303037	0.00134597	0.498493	0.232056	1.81927	225	c("KIT", "SNCA", "PROS1", "CFH", "CTSK", "JAK2", "TFF3", "CRHBP", "CX3CR1", "DRD4", "NOX4", "IFIT2", "HERC5", "HDAC9", "IFIT1", "SCG2", "RAB23", "COLEC12", "RNASEL", "CYSLTR1", "BCL2", "MASP1", "APOBEC3G", "RSAD2", "CDO1", "CXCR4", "CAMK2B", "APOBEC3F", "XAF1", "PTPN11", "PELI2", "EPHX2", "IRF6", "TNIP1", "INHBA", "HLA-DRB5", "IFIT5", "HLA-DRB1", "VCAM1", "EIF2AK2", "PLA2G4C", "CAMK2G", "ICOSLG",…
669	CELL PROJECTION MEMBRANE%GO%GO:0031253	0.000303607	0.00134649	0.498493	0.392164	2.15063	42	c("SFRP4", "FRZB", "FZD2", "ANTXR1", "DPP4", "CA4", "KANK1", "FZD1", "SPTBN1", "FZD7", "IFIT5", "BBS4", "SH3YL1", "FZD6", "MACF1", "FZD3", "PACSIN1", "ARHGEF2", "TMEM67", "APC", "SYNE2")
670	POSITIVE REGULATION OF INTRACELLULAR TRANSPORT%GO%GO:0032388	0.000307877	0.00136339	0.498493	0.397334	2.19832	43	c("TMEM30B", "SNCA", "THY1", "BMP4", "XPO4", "TGFB3", "KANK1", "CAPN3", "BAMBI", "IGF1", "TPR", "TCF7L2", "DACT1", "MYO1C", "ASPH", "RBPMS", "BMPR1A", "P2RX7", "F2R", "GAS6", "TRPC1", "SCP2", "KHDRBS1", "POU5F1", "RBM22", "DMAP1", "C5ORF41", "DDX58")
671	REGULATION OF MEMBRANE POTENTIAL%GO%GO:0042391	0.000309936	0.00136981	0.498493	0.33519	2.13415	71	c("KCNA5", "MBP", "SCN2B", "DRD4", "KCNE1", "KCNMA1", "CHRNA3", "SCN3B", "SCN4B", "BCL2", "CXCR4", "KCNMB4", "DLG4", "SHANK1", "KCNMB2", "CACNA1B", "WWP2", "KIF5B", "ACTN2", "NLGN4X", "CAV3", "GPC1", "CACNA1D", "NLGN1", "P2RX7", "HES5", "NEDD4L", "SMAD7", "NLGN3", "CD9", "PKP2", "EHD3", "LRRK2", "DMD", "GJA1", "RYR2", "SRI", "NF1", "SBF2", "CASQ2", "PLN", "DSC2", "PRKCZ", "BNIP3", "PRDX3", "CACNB…
672	SH3/SH2 ADAPTOR ACTIVITY%GO%GO:0005070	0.00031025	0.00136981	0.498493	0.525697	2.17073	18	c("SOCS2", "CHN1", "ARHGAP1", "PTPN11", "SHB", "GAB1", "CHN2", "SH3BGR", "STAM", "SORBS1", "SH3BGRL")
673	BIOCARTA_BIOPEPTIDES_PATHWAY%MSIGDB_C2%BIOCARTA_BIOPEPTIDES_PATHWAY	0.00031371	0.00138156	0.498493	0.572293	2.22052	15	c("JAK2", "FYN", "CAMK2B", "CAMK2G", "GNAI1", "CAMK2A", "CDK5", "MAPT", "STAT4", "CAMK2D", "STAT5B", "PRKCA")
674	AXIS SPECIFICATION%GO%GO:0009798	0.000314309	0.00138156	0.498493	0.497103	2.17465	21	c("SFRP1", "TTC8", "PKD1L1", "LRP5", "WNT2B", "CXXC4", "WNT9A", "DDIT3", "STIL", "TBX3", "MDFI", "COBL", "BCOR", "CTNNB1", "SMAD6", "SETDB2")
675	INNER EAR DEVELOPMENT%GO%GO:0048839	0.000314309	0.00138156	0.498493	0.496463	2.17186	21	c("FRZB", "PTPN11", "SOX9", "FOXI2", "SMO", "CEP290", "FZD6", "FGFR2", "FZD3", "DVL2", "DVL3", "PROX1", "HES5")
676	POSITIVE REGULATION OF CANONICAL WNT RECEPTOR SIGNALING PATHWAY%GO%GO:0090263	0.000315593	0.00138515	0.498493	0.487448	2.20578	23	c("SFRP4", "SOX4", "SFRP1", "DKK2", "DIXDC1", "WNT2B", "BAMBI", "TRPM4", "RNF146", "SFRP2", "DAPK3", "FGFR2", "PPP2R3A", "TNKS", "ILK")
677	ACID-AMINO ACID LIGASE ACTIVITY%GO%GO:0016881	0.000316258	0.00138602	0.498493	0.28826	2.00757	109	c("HERC5", "MYLIP", "HECW2", "UBE2H", "KLHL13", "HERC6", "FBXL14", "RNF103", "RNF217", "BTRC", "UBE2Q2", "TRIM33", "LMO7", "HECTD2", "RNF20", "FBXO4", "TRIM2", "RNF146", "WWP2", "FANCL", "ANAPC10", "FBXW11", "ATPBD4", "TTLL3", "FBXO21", "UBE2D1", "PIAS2", "BRCA1", "NSMCE1", "UBE2W", "TTC3", "TTLL1", "DDB2", "FBXO9", "PARK2", "NEDD4L", "RNF25", "PIAS1", "BCOR", "PPCS", "BIRC6", "KLHL20", "UBE2T", …
678	INTRACELLULAR RECEPTOR MEDIATED SIGNALING PATHWAY%GO%GO:0030522	0.000321335	0.00140619	0.498493	0.356309	2.11465	56	c("ESR1", "BCL2", "RORA", "NR2F1", "PDK3", "CRY2", "MED30", "NLRP1", "AR", "UBB", "PTGER3", "PIAS2", "BRCA1", "NR1D2", "PPARGC1A", "SUGT1", "MED12", "DDX54", "P2RX7", "APP", "TXNIP", "PPARGC1B", "PIAS1", "SP100", "ESRRB", "TRAF6", "MAP3K7", "CTNNB1", "RNF14", "MED13", "DDX58", "UBC", "RORC", "UBR5", "RHOXF1", "CDK7", "MED4", "MLL5", "PPARA", "CALCOCO1", "NR6A1")
679	CELLULAR RESPONSE TO OXYGEN-CONTAINING COMPOUND%GO%GO:1901701	0.00032223	0.00140804	0.498493	0.251781	1.90015	178	c("SNCA", "SOX4", "EPHA3", "SOCS2", "IGFBP5", "SFRP1", "JAK2", "CRHBP", "GNB3", "HDAC9", "APLP1", "FOXS1", "FGF1", "FGF18", "COLEC12", "ATP6V1G2", "SOD3", "PKD2", "NET1", "PIK3R1", "SCARB1", "ANKRD1", "FOXC2", "RYR3", "PXDNL", "PTPN11", "GNG11", "SOX9", "PDK3", "FZD7", "WNT9A", "GRB10", "HMGB2", "OSBPL7", "UBR1", "GAB1", "PDE3B", "SMO", "GHR", "GNG2", "PRKAA2", "ADCY2", "CCL5", "TSC1", "FGF2", "H…
680	GLYCOPROTEIN METABOLIC PROCESS%GO%GO:0009100	0.000325491	0.0014202	0.498493	0.287714	2.00377	109	c("ST8SIA2", "SULF1", "AGRN", "KCNE1", "TSPAN8", "CHSY3", "GPC6", "ST8SIA4", "B3GNT2", "EXT1", "SULF2", "ST6GALNAC1", "MGAT3", "TNIP1", "GFPT1", "IGF1", "COG7", "ST3GAL3", "SDC2", "GAL3ST3", "ADAMTS13", "CSPG5", "HEXB", "IDS", "CHST14", "SEC31A", "GLCE", "GALNT11", "TRAK1", "B3GNT8", "FUT8", "HEXA", "GPC1", "ST6GALNAC4", "CHST8", "SIRT1", "DPM3", "SIRT4", "IDUA", "HSPG2", "MGAT4B", "PMM1", "ST6GA…
681	POSITIVE REGULATION OF CATABOLIC PROCESS%GO%GO:0009896	0.000327529	0.00142699	0.498493	0.338517	2.05933	60	c("APOE", "ASB9", "PRICKLE1", "TP53INP1", "TP53INP2", "OSBPL7", "IGF1", "PLK3", "ULK1", "DACT1", "PRKAA2", "CLU", "PACSIN3", "TAF1", "VIP", "CDKN1B", "SIRT1", "SUPT5H", "PPP2R3A", "APC", "PSMD10", "SMAD7", "TFEB", "SH3D19", "PIAS1", "NKD1", "GPLD1", "LRRK2", "PAFAH1B2", "NUB1", "FZR1", "SUMO1", "PNPLA2", "C5ORF41", "TWIST1", "TNRC6B", "TRIM32", "DAB2IP", "SCOC", "TRIB2", "PPARA", "CNOT7", "ARHGEF…
682	VACUOLE%GO%GO:0005773	0.000328777	0.00143033	0.498493	0.274473	1.94824	121	c("FMOD", "OGN", "CTSK", "LUM", "OMD", "AGRN", "CRHBP", "KCNE1", "TSPAN8", "RAB23", "PRELP", "GPC6", "FYCO1", "TP53INP1", "TP53INP2", "TPCN1", "ASAH1", "VPS41", "HLA-DRB5", "OSBPL7", "HLA-DRB1", "RAMP2", "CTSF", "SDC2", "ULK1", "CSPG5", "HEXB", "IDS", "SNAP23", "ARSG", "HEXA", "ABCA2", "PLA2G15", "WIPI1", "GPC1", "GABARAPL2", "SLC29A3", "STS", "IDUA", "HSPG2", "TMEM9", "HOOK2", "ITM2C", "RAB12", …
683	METAL ION HOMEOSTASIS%GO%GO:0055065	0.000329493	0.00143134	0.498493	0.309131	2.03155	82	c("HTR2B", "PLCE1", "SNCA", "ABCG2", "EDNRA", "DRD4", "HEPH", "KCNMA1", "CYBRD1", "ATP6V1G2", "CYSLTR1", "CDH23", "SLC40A1", "PKD2", "SLC30A1", "PDE6A", "EPHX2", "TNNI3", "P2RY1", "ATP7B", "CSRP3", "CCL5", "PDE6B", "FGF2", "RGN", "CAV3", "ITPR1", "SLC22A17", "ATP2C1", "F2R", "NEDD4L", "TRPC1", "STIM2", "ATP6V1E2", "IBTK", "VAPB", "BBC3", "RYR2", "CP", "ATP6V1B1", "SRI", "FTH1", "SLC8A1", "ATP6V1D…
684	DIGESTIVE SYSTEM DEVELOPMENT%GO%GO:0055123	0.000348666	0.00151021	0.498493	0.483907	2.28529	26	c("KIT", "TGFB2", "GLI1", "PCSK5", "GATA5", "RARB", "EPHB3", "SMO", "GATA6", "DACT1", "PKD1", "NPHP3", "ID2", "FGFR2")
685	DIGESTIVE TRACT DEVELOPMENT%GO%GO:0048565	0.000348666	0.00151021	0.498493	0.483907	2.28529	26	c("KIT", "TGFB2", "GLI1", "PCSK5", "GATA5", "RARB", "EPHB3", "SMO", "GATA6", "DACT1", "PKD1", "NPHP3", "ID2", "FGFR2")
686	MULTI-ORGANISM REPRODUCTIVE PROCESS%GO%GO:0044703	0.000349239	0.00151049	0.498493	0.342932	2.11427	64	c("SFRP4", "COL16A1", "CRHBP", "PTGFR", "ACE2", "NPPA", "IFIT1", "TRO", "BCL2", "PCSK5", "RPS4Y1", "HPGD", "RLN2", "PTHLH", "EIF2AK2", "PLA2G4C", "CLIC5", "WWP2", "UBB", "RPL31", "SUPT5H", "APP", "RPS23", "VPS37D", "GAS6", "PZP", "THOC1", "USF2", "RPL3L", "VAPB", "NFIA", "ITGAV", "NMT2", "THOC2", "DYNLT1", "UBC", "PPID", "TSG101")
687	BRANCHED-CHAIN AMINO ACID METABOLIC PROCESS%GO%GO:0009081	0.000353277	0.00152415	0.498493	0.570289	2.21274	15	c("GHR", "IVD", "BCKDHA", "HMGCL", "ACADSB", "ALDH6A1", "AUH", "STAT5B", "HIBADH", "HIBCH", "DBT", "ACAD8", "ACAT1", "DLD")
688	ORGANIC HYDROXY COMPOUND BIOSYNTHETIC PROCESS%GO%GO:1901617	0.000353427	0.00152415	0.498493	0.421578	2.17495	34	c("SNCA", "SLC44A5", "TM7SF2", "TGFB2", "APOA1", "SLC44A1", "FGF2", "LCAT", "SLC27A1", "ACADM", "SCP2", "CHKB", "HAND2", "SLC44A2", "SAMD8", "IDI2", "NPC1L1", "CNBP", "FDFT1", "GATA3", "DCT", "TMLHE", "PHOSPHO1", "ACHE", "GGPS1", "ALDH9A1")
689	NEGATIVE REGULATION OF ANGIOGENESIS%GO%GO:0016525	0.000359278	0.00154714	0.498493	0.482936	2.14983	22	c("THBS4", "SULF1", "THBS2", "SERPINF1", "NPPB", "MAP2K5", "AMOT", "PDE3B", "THBS3", "PTPRM", "HDAC5", "ROCK1", "HHEX", "KRIT1", "FOXO4")
690	REGULATION OF DNA BINDING%GO%GO:0051101	0.000369639	0.00158945	0.498493	0.482699	2.27958	26	c("JAK2", "LEF1", "GZMA", "HMGB2", "IGF1", "SMO", "MDFI", "RSF1", "NFIB", "SIN3A", "ZNF675", "SP100", "TNKS", "HABP4", "HAND2", "TRAF6", "SUMO1", "EDF1", "GATA3", "TWIST1")
691	REGULATION OF ENDOTHELIAL CELL PROLIFERATION%GO%GO:0001936	0.000372109	0.00159775	0.498493	0.4348	2.21553	32	c("THBS4", "HTR2B", "SULF1", "BMP4", "APOE", "SCG2", "ATPIF1", "HMGB2", "NRP1", "THBS3", "BMPR2", "PTPRM", "PRKD1", "FGF2", "TNFSF12", "PROX1", "KRIT1", "PRKCA", "AGGF1", "VEGFA", "NF1", "VEGFB")
692	PROTEOGLYCAN METABOLIC PROCESS%GO%GO:0006029	0.000373441	0.00159794	0.498493	0.401291	2.14612	39	c("SULF1", "AGRN", "CHSY3", "GPC6", "EXT1", "SULF2", "IGF1", "SDC2", "GAL3ST3", "CSPG5", "HEXB", "IDS", "CHST14", "GLCE", "HEXA", "GPC1", "CHST8", "IDUA", "HSPG2")
693	GROWTH FACTOR BINDING%GO%GO:0019838	0.000373768	0.00159794	0.498493	0.419664	2.16508	34	c("IGFBP5", "IGFBP3", "NTRK2", "TGFB3", "LTBP4", "COL1A2", "S100A13", "SORT1", "COL3A1", "NRP1", "GHR", "CEP57", "FGFR2", "FGFR3", "GPC1", "IL2RB", "CD36", "IGF1R", "COL2A1", "FGFBP3", "ITGAV", "COL1A1")
694	INTEGRINS IN ANGIOGENESIS%PATHWAY INTERACTION DATABASE NCI-NATURE CURATED DATA%INTEGRINS IN ANGIOGENESIS	0.000373768	0.00159794	0.498493	0.420106	2.16736	34	c("EDIL3", "COL1A2", "PIK3R1", "COL7A1", "PTPN11", "GPR124", "COL3A1", "COL4A5", "VTN", "FGF2", "CDKN1B", "VCL", "ROCK1", "ILK", "IGF1R", "COL2A1", "AKT1", "MFGE8", "ITGAV", "COL4A6", "COL1A1", "VEGFA", "RPS6KB1", "PIK3CA")
695	NEGATIVE REGULATION OF CELL CYCLE PROCESS%GO%GO:0010948	0.000374487	0.00159871	0.498493	0.354945	2.10655	56	c("SOX4", "BMP4", "PRMT2", "PKD2", "APBB2", "CRADD", "TPR", "STAG2", "DACT1", "MSH2", "KANK2", "ATM", "BUB1", "FHL1", "ANAPC10", "SETMAR", "UBB", "MAD2L1", "CDK5RAP2", "UBE2D1", "BRCA1", "CDKN1B", "MYO16", "TMEM67", "APC", "TERF1", "PSMD10", "PSMB10", "BRD7", "SMC3", "FBXW7")
696	AMINO ACID AND DERIVATIVE METABOLISM%REACTOME%REACT_13.4	0.000377355	0.00160864	0.498493	0.341561	2.12623	66	c("DIO2", "GATM", "AZIN1", "CDO1", "CSAD", "ADC", "ALDH4A1", "ODC1", "HGD", "IVD", "GAMT", "BCKDHA", "MAT2B", "ACADSB", "PSPH", "HAAO", "ALDH6A1", "AUH", "PSMD10", "OAT", "MTR", "GLS2", "PSMB10", "HIBADH", "APIP", "HIBCH", "AFMID", "GLUD1", "DBT", "AADAT", "ACAD8", "PCBD1", "QDPR", "NAGS", "SUOX", "ACAT1", "ALDH7A1", "GCLC", "TMLHE", "DLD", "GOT2", "DLST", "ASMT", "ALDH9A1", "MRPL12")
697	CELLULAR PROTEIN CATABOLIC PROCESS%GO%GO:0044257	0.000378214	0.00160999	0.498493	0.270249	1.93274	126	c("SPATA18", "HERC5", "ENC1", "HECW2", "UBE2H", "HERC6", "FBXL14", "RNF103", "RNF217", "GZMA", "BTRC", "ATXN3", "DDIT3", "HECTD2", "FBXO8", "RNF20", "OMA1", "SIAH2", "FBXO4", "FBXO31", "TBL1XR1", "RNF146", "CRBN", "WWP2", "ANAPC10", "FBXW11", "UBB", "SKP2", "MAD2L1", "FBXO21", "UBE2D1", "SIRT1", "NFE2L2", "UBE2W", "FOXRED2", "TTC3", "TMEM67", "RAB12", "BNIP3L", "ATE1", "FBXO9", "PARK2", "NEDD4L",…
698	POSITIVE REGULATION OF CELL DEVELOPMENT%GO%GO:0010720	0.000382592	0.00162629	0.498493	0.387935	2.12744	42	c("SERPINE2", "BMP4", "LEF1", "TGFB2", "NTRK2", "TGFB3", "DIXDC1", "SOX8", "CXCR4", "PTPRD", "SERPINF1", "BAMBI", "SMO", "TCF7L2", "ROBO1", "ISLR2", "MAPT", "TWF2", "CTNNB1", "CAPRIN1", "COL1A1", "SMARCD3", "VEGFA", "TWIST1", "BCL11A", "RGS14", "CAPRIN2", "TRIM32", "SLIT2")
699	PROTEIN UBIQUITINATION%GO%GO:0016567	0.000383183	0.00162647	0.498493	0.261923	1.89311	138	c("HERC5", "ENC1", "BCL2", "MYLIP", "HECW2", "UBE2H", "KLHL13", "ASB9", "HERC6", "FBXL14", "RNF103", "RNF217", "BTRC", "UBE2Q2", "KLHL7", "TRIM33", "LMO7", "HECTD2", "RNF20", "FBXO4", "RNF146", "CRBN", "WWP2", "KLHL12", "FANCL", "ANAPC10", "FBXW11", "UBB", "FBXO21", "UBE2D1", "BRCA1", "SIRT1", "NFE2L2", "NSMCE1", "UBE2W", "TTC3", "DDB2", "FBXO9", "PARK2", "NEDD4L", "PSMD10", "RNF25", "BCOR", "TNK…
700	GLAND DEVELOPMENT%GO%GO:0048732	0.000388479	0.00164659	0.498493	0.406887	2.14465	36	c("SFRP4", "FRZB", "MDK", "JAK2", "LEF1", "TGFB2", "TGFB3", "CRIP1", "LRP5", "IRF6", "SOX9", "SMO", "AR", "ID2", "FGFR2", "TBX3")
701	SEXUAL REPRODUCTION%GO%GO:0019953	0.000389054	0.00164668	0.498493	0.305892	2.03694	87	c("KIT", "SOX8", "REC8", "OSGIN2", "USP9Y", "DNALI1", "PIWIL4", "SOX9", "TSSK6", "HPGD", "ADC", "MAEL", "DPY19L2", "DZIP1", "CYP26B1", "SMO", "DYNLL1", "CEP57", "BBS4", "TCFL5", "PLCB1", "ADAM21", "MYCBPAP", "PNMA1", "RPL39L", "TDRD6", "GDF9", "BCL2L2", "SPAG4", "NPHP1", "KIAA0430", "ZP3", "CCNI", "BBS2", "CD9", "NPM2", "ADAM2", "HERC4", "PKDREJ", "CTNNB1", "NANOS3", "DMC1", "PRMT7", "ADAM20", "N…
702	MOLECULES ASSOCIATED WITH ELASTIC FIBRES%REACTOME%REACT_150331.2	0.000389801	0.00164749	0.498493	0.515561	2.17219	19	c("MFAP4", "BMP4", "LTBP3", "TGFB2", "TGFB3", "LTBP4", "FBLN2", "ITGA8", "EFEMP2", "VTN")
703	ORGANELLE LOCALIZATION%GO%GO:0051640	0.000391054	0.00165028	0.498493	0.36257	2.11725	52	c("CENPA", "NDC80", "MAP4", "KIF13A", "LRMP", "FYCO1", "NUSAP1", "NIN", "SPIRE1", "BBS4", "SEC31A", "MFN2", "PEX1", "ARHGAP21", "SNAP23", "SHROOM2", "KIF5B", "KLHL12", "WIPI1", "CDK5RAP2", "CLASP1", "RHOT2", "NLGN1", "SYNE2", "BBS2", "LRRK2", "MEF2A", "NDE1", "MTM1", "DYNLT1", "KIFAP3", "VPS33A")
704	CENTROSOME%GO%GO:0005813	0.000391573	0.00165028	0.498493	0.249314	1.86397	170	c("HSD17B14", "BRSK1", "TTC8", "KIF13A", "CKAP2", "TCEA2", "DYNC1LI2", "RAB11FIP3", "PLK2", "LRRCC1", "AK5", "DZIP1", "PLK3", "NIN", "CETN3", "FBXO40", "RABGAP1", "DYNLL1", "ALS2", "CEP68", "CEP57", "GNAI1", "CNTROB", "BBS4", "KIF20B", "CEP290", "STIL", "PLEKHA7", "KIAA0753", "DCTN1", "FGFR1OP", "CEP350", "ODF2L", "FBXW11", "CDKL2", "ALMS1", "PIBF1", "CDK5RAP2", "SORBS1", "CROCC", "CLASP1", "PCGF…
705	CELL DEATH SIGNALLING VIA NRAGE, NRIF AND NADE%REACTOME%REACT_13720.1	0.000392694	0.00165094	0.498493	0.445057	2.14066	27	c("NET1", "TIAM2", "ARHGEF3", "MCF2", "ARHGEF12", "ARHGEF4", "BCL2L11", "KALRN", "AKAP13", "ARHGEF9", "UBB", "OBSCN", "SOS2", "ARHGEF6", "ARHGEF2", "SQSTM1", "TRAF6", "UBC", "NGEF", "ARHGEF11")
706	LEUKOCYTE PROLIFERATION%GO%GO:0070661	0.000392843	0.00165094	0.498493	0.56649	2.198	15	c("KIT", "NPR3", "TNFRSF4", "LEF1", "ACE", "BCL2", "BTN3A1", "CADM1", "MEF2C")
707	SIGNALING BY PDGF%REACTOME%REACT_16888.4	0.000403734	0.00169431	0.498493	0.331085	2.07213	67	c("THBS4", "KIT", "COL9A1", "JAK2", "PDE1A", "PDGFD", "THBS2", "PLAT", "HBEGF", "COL9A2", "FGF1", "FGF18", "FYN", "PDE1C", "PIK3R1", "PTPN11", "RICTOR", "GAB1", "THBS3", "COL4A5", "ADCY2", "FGF2", "NRG2", "FGF9", "CDKN1B", "ITPR1", "TNRC6A")
708	INNER EAR MORPHOGENESIS%GO%GO:0042472	0.000406775	0.00170435	0.498493	0.556389	2.20033	16	c("FRZB", "SOX9", "FOXI2", "SMO", "CEP290", "FZD6", "FGFR2", "FZD3", "DVL2", "DVL3", "PROX1")
709	PHOSPHATIDYLINOSITOL BIOSYNTHETIC PROCESS%GO%GO:0006661	0.000407276	0.00170435	0.498493	0.385638	2.11484	42	c("HTR2B", "INPP4B", "PIK3R1", "PIK3C2B", "PIP4K2B", "ATM", "MTMR4", "FGF2", "PGAP1", "PIGK", "MPPE1", "PIGM", "SLC27A1", "PIGZ", "PIGP", "DPM3", "DPM1", "PIK3R2", "SYNJ2", "MTMR14", "PIK3C3", "PIK3CG", "PIGV", "MTMR3")
710	CATION CHANNEL COMPLEX%GO%GO:0034703	0.000414452	0.00173194	0.498493	0.403512	2.13865	37	c("KCNA5", "HSPA2", "SCN2B", "KCNT2", "KCNE1", "KCNMA1", "ABCC8", "SCN3B", "SCN4B", "KCNK6", "KCNMB4", "CACNA2D1", "KCNMB2", "KCNS1", "ASPH", "SCN3A", "CACNA1D", "HCN2")
711	PLASMA MEMBRANE ORGANIZATION%GO%GO:0007009	0.000421672	0.00175964	0.498493	0.480928	2.17628	23	c("SCN3B", "PACS1", "CXCR4", "SPTBN1", "FGF13", "RAMP2", "ANK1", "P2RY1", "FCHO2", "CAV3", "PACSIN1", "TRIM72", "EHD3", "GAS6", "SCP2")
712	TRANSCRIPTION COREPRESSOR ACTIVITY%GO%GO:0003714	0.000427787	0.00178264	0.498493	0.323991	2.05233	70	c("CRYM", "HDAC9", "ZEB1", "ANKRD1", "HSF4", "KLF12", "DDIT3", "SIAH2", "DNMT3B", "ID4", "TBL1XR1", "ELK3", "NAB2", "ZHX1", "NR0B2", "JAZF1", "ZNF85", "E2F8", "SIRT1", "ZNF136", "CBFA2T2", "SAP18", "DDX54", "PROX1", "NFIB", "NPAT", "PIAS1", "HDAC3", "SP100", "BCOR", "BRD7", "ZNF281", "MNT", "FEV", "TLE1", "HOXC6", "SSX1", "PHF12", "ZFPM2", "MXI1", "PBXIP1", "LDB1", "ZHX2", "PFDN5", "E2F1", "EID1"…
713	BRANCHING MORPHOGENESIS OF AN EPITHELIAL TUBE%GO%GO:0048754	0.000429102	0.00178562	0.498493	0.443197	2.13171	27	c("BMP4", "LEF1", "PAK1", "FOXS1", "FGF1", "PKD2", "FOXC2", "LRP5", "FOXD2", "PKD1", "SFRP2", "FGF2", "FGFR2")
714	ECM-receptor interaction%KEGG%hsa04512	0.000429916	0.0017865	0.498493	0.360401	2.10459	52	c("THBS4", "COMP", "AGRN", "THBS2", "SV2A", "COL1A2", "ITGA8", "LAMA2", "CD47", "LAMA4", "ITGA10", "LAMC3", "COL3A1", "SDC2", "THBS3", "COL4A5", "GP1BA", "VTN", "ITGA9", "SV2B", "CD36", "HSPG2", "LAMA3", "COL2A1", "ITGB7", "ITGB4", "ITGAV", "LAMB2", "COL4A6", "COL1A1")
715	RESPONSE TO LIGHT STIMULUS%GO%GO:0009416	0.000431557	0.00179081	0.498493	0.353113	2.07761	53	c("MME", "CCND1", "SCARA3", "ELOVL4", "PLEKHB1", "BRSK1", "CRIP1", "CRY2", "MSH2", "PDE6B", "SLC24A1", "ERCC5", "TP73", "USP28", "ABCA4", "NPHP1", "FECH", "APP", "CAT", "DDB2", "CLOCK", "ERCC6", "ERCC2", "RBM4B", "FBXW7", "TMEM161A", "AKT1", "REV1", "NF1", "PPID", "RPAIN", "RGS14", "UBE4B", "TRIM32", "TP63", "ERCC4", "ERCC3", "HYAL1", "UBE2A", "FBXL3", "ERCC8")
716	TRANSFORMING GROWTH FACTOR BETA RECEPTOR SIGNALING PATHWAY%GO%GO:0007179	0.000439454	0.00182103	0.498493	0.380198	2.12524	44	c("FMOD", "GDF10", "LEFTY2", "TGFB2", "GDF15", "TGFB3", "COL1A2", "USP9Y", "PPP1R15A", "HPGD", "COL3A1", "TRIM33", "CDKN2B", "MTMR4", "UBB", "GDF9", "UBE2D1", "BMPR1A", "TFDP2", "NEDD4L", "LTBP2", "SMAD7", "SMAD5", "PPP1CB")
717	CALCIUM ION BINDING%GO%GO:0005509	0.00044531	0.00184273	0.498493	0.323617	2.07498	73	c("THBS4", "COMP", "SNCA", "ENPP2", "AGRN", "LTBP4", "S100A6", "MYL7", "MASP1", "PKD2", "DNASE1L3", "CAPN3", "S100A13", "ANXA4", "GSN", "ADAMTS13", "S100A2", "THBS3", "JAG1", "RGN", "MACF1", "ASPH", "TPD52", "PSPH", "ATP2C1", "SRR", "CETN2", "STIM2", "RASGRP3", "ASPN", "CLEC3B", "MAN1B1", "PRF1", "FKBP9", "NELL2", "SRI", "HPGDS", "FAT2", "CASQ2", "CABYR", "AMY2A", "KIAA0528", "TNNC1", "PCDHB7", "…
718	RESPONSE TO DECREASED OXYGEN LEVELS%GO%GO:0036293	0.000449347	0.00185426	0.498493	0.360114	2.10291	52	c("SFRP1", "TGFB2", "KCNMA1", "TGFB3", "DPP4", "CXCR4", "PDIA2", "MYOCD", "WTIP", "PDK3", "MDM4", "PLK3", "GATA6", "ARNT2", "UBB", "FAM162A", "UBE2D1", "SIRT1", "ITPR1", "EP300", "NARFL", "FUNDC1", "HIF1AN", "RBX1", "BBC3", "RYR2", "CA9", "LONP1", "UBC", "VEGFA", "NF1", "TWIST1")
719	RESPONSE TO HYPOXIA%GO%GO:0001666	0.000449347	0.00185426	0.498493	0.360114	2.10291	52	c("SFRP1", "TGFB2", "KCNMA1", "TGFB3", "DPP4", "CXCR4", "PDIA2", "MYOCD", "WTIP", "PDK3", "MDM4", "PLK3", "GATA6", "ARNT2", "UBB", "FAM162A", "UBE2D1", "SIRT1", "ITPR1", "EP300", "NARFL", "FUNDC1", "HIF1AN", "RBX1", "BBC3", "RYR2", "CA9", "LONP1", "UBC", "VEGFA", "NF1", "TWIST1")
720	RESPONSE TO OXYGEN LEVELS%GO%GO:0070482	0.000450844	0.00185785	0.498493	0.351098	2.06576	53	c("SFRP1", "TGFB2", "KCNMA1", "TGFB3", "DPP4", "CXCR4", "PDIA2", "MYOCD", "WTIP", "PDK3", "MDM4", "PLK3", "GATA6", "ARNT2", "UBB", "FAM162A", "UBE2D1", "SIRT1", "ITPR1", "EP300", "NARFL", "FUNDC1", "HIF1AN", "RBX1", "BBC3", "RYR2", "CA9", "LONP1", "UBC", "VEGFA", "NF1", "TWIST1")
721	ION CHANNEL COMPLEX%GO%GO:0034702	0.000461578	0.00189945	0.498493	0.382887	2.0922	41	c("KCNA5", "HSPA2", "SCN2B", "KCNT2", "KCNE1", "KCNMA1", "CHRNA3", "ABCC8", "SCN3B", "SCN4B", "KCNK6", "KCNMB4", "CACNA2D1", "KCNMB2", "KCNS1", "ASPH", "SCN3A", "CACNA1D", "HCN2")
722	VOLTAGE-GATED CATION CHANNEL ACTIVITY%GO%GO:0022843	0.000466515	0.00191711	0.498493	0.382266	2.0888	41	c("KCNA5", "SCN2B", "KCNT2", "KCNE1", "KCNMA1", "KCNS3", "SCN3B", "SCN4B", "KCNA4", "PKD2", "KCNC4", "KCNK6", "CACNA2D1")
723	HEMATOPOIETIC OR LYMPHOID ORGAN DEVELOPMENT%GO%GO:0048534	0.000469221	0.00192556	0.498493	0.301397	2.01848	90	c("KIT", "SOX4", "SFRP1", "JAK2", "BMP4", "LEF1", "TGFB2", "HDAC9", "ACE", "RSAD2", "SNRK", "LRP5", "GAB2", "WNT2B", "ATPIF1", "INHBA", "EPHB3", "VCAM1", "CDKN2B", "MSH2", "PTGER4", "ATM", "SFRP2", "JAG1", "ZAP70", "HDAC5", "ZNF160", "HDAC4", "FGFR2", "MEF2C", "TPD52", "MLL", "FNIP1", "KITLG", "FOXP1", "HHEX", "GAS6", "AICDA", "HAND2", "ARIH2", "CTNNB1", "TIRAP", "VEGFA", "ATP7A", "MLF1", "VPS33A…
724	PROTEIN TRANSPORT%GO%GO:0015031	0.00048229	0.00197383	0.498493	0.240169	1.81114	177	c("JAK2", "TGFB2", "IFIT1", "RASSF9", "SCG2", "ATP6V1G2", "PCSK5", "COPZ2", "KIF13A", "RPS4Y1", "SCG5", "PACS1", "S100A13", "PRICKLE1", "RAB26", "CLIP3", "PPP1R10", "SPTBN1", "RTP4", "BTN3A1", "RAMP2", "ANK1", "COG7", "TPR", "LMTK2", "PEX7", "CEP57", "BBS1", "PKD1", "CEP290", "MFN2", "LRP1B", "TRAK1", "PEX1", "VPS45", "TLK1", "SNX16", "MACF1", "SNX1", "MYO1C", "DUSP16", "RPL31", "PEX6", "CD36", "…
725	IMMUNE SYSTEM DEVELOPMENT%GO%GO:0002520	0.000483273	0.00197383	0.498493	0.294503	2.00019	96	c("KIT", "SOX4", "SFRP1", "JAK2", "BMP4", "LEF1", "TGFB2", "HDAC9", "ACE", "RSAD2", "SNRK", "LRP5", "GAB2", "WNT2B", "ATPIF1", "INHBA", "EPHB3", "HMGB2", "VCAM1", "CDKN2B", "MSH2", "PTGER4", "ATM", "SFRP2", "JAG1", "ZAP70", "HDAC5", "ZNF160", "HDAC4", "FGFR2", "MEF2C", "TPD52", "MLL", "FNIP1", "KITLG", "FOXP1", "POLL", "HHEX", "GAS6", "AICDA", "HAND2", "ARIH2", "CTNNB1", "TIRAP", "PMS2", "VEGFA",…
726	REGULATION OF STRESS-ACTIVATED MAPK CASCADE%GO%GO:0032872	0.000483644	0.00197383	0.498493	0.36395	2.05103	46	c("SFRP4", "MDFIC", "PAK1", "TGFB2", "TPD52L1", "DIXDC1", "MID1", "EDA2R", "TNIK", "FZD7", "MAP4K4", "DACT1", "PLCB1", "TP73", "MAPK8IP1", "DVL2", "ZMYND11", "DVL3", "RAP2A", "ZNF675", "HDAC3", "IGF1R", "TAOK1", "TRAF6", "MAP3K7")
727	REGULATION OF STRESS-ACTIVATED PROTEIN KINASE SIGNALING CASCADE%GO%GO:0070302	0.000483644	0.00197383	0.498493	0.36395	2.05103	46	c("SFRP4", "MDFIC", "PAK1", "TGFB2", "TPD52L1", "DIXDC1", "MID1", "EDA2R", "TNIK", "FZD7", "MAP4K4", "DACT1", "PLCB1", "TP73", "MAPK8IP1", "DVL2", "ZMYND11", "DVL3", "RAP2A", "ZNF675", "HDAC3", "IGF1R", "TAOK1", "TRAF6", "MAP3K7")
728	INTRACELLULAR PROTEIN KINASE CASCADE%GO%GO:0007243	0.000487172	0.00198549	0.498493	0.283027	1.97113	109	c("HTR2B", "SOCS2", "JAK2", "MDFIC", "STK38L", "PAK1", "SCG2", "ICK", "FYN", "PKD2", "SOX9", "TNIK", "FGF13", "PLK3", "TPR", "MAP4K4", "GHR", "PKD1", "DUSP6", "PTGER4", "CCL5", "ADORA2B", "PRKD1", "ZAP70", "DAPK3", "MEF2C", "IRAK1BP1", "UBB", "ERC1", "FGFR3", "CISH", "MAP3K12", "ARHGEF6", "TIAF1", "STAT4", "MAPK10", "F2R", "ZP3", "STAT5B", "ZNF675", "PIAS1", "GAS6", "LRRK2", "RASGRP3", "AKAP11", …
729	REGULATION OF NUCLEAR BETA CATENIN SIGNALING AND TARGET GENE TRANSCRIPTION%PATHWAY INTERACTION DATABASE NCI-NATURE CURATED DATA%REGULATION OF NUCLEAR BETA CATENIN SIGNALING AND TARGET GENE TRANSCRIPTION	0.00048873	0.00198911	0.477271	0.398521	2.1313	39	c("CCND1", "MDFIC", "TCF4", "LEF1", "CCND2", "TNIK", "BTRC", "TCF7L2", "TBL1XR1", "CBY1", "AR", "HBP1", "ID2", "YWHAQ", "DVL3", "BCL9", "EP300", "MED12", "NCOA2", "APC")
730	CHROMOSOME ORGANIZATION%GO%GO:0051276	0.000490493	0.00199282	0.477271	0.237231	1.8272	204	c("CENPA", "JAK2", "NDC80", "HMGN2", "LEF1", "HIST1H2AC", "HDAC9", "PRMT2", "SOX15", "ZSCAN4", "REC8", "CHD6", "XPC", "NUSAP1", "SOX9", "TSSK6", "EYA1", "ING4", "HMGB2", "HIST1H2BC", "NCAPD3", "HIST1H2BG", "SMARCA2", "RNF20", "FBXO4", "TCF7L2", "STAG2", "MSH2", "SUPT3H", "NCAPD2", "SMARCC2", "H1FX", "BAZ1B", "HDAC5", "HIST1H2AE", "HDAC4", "PRDM5", "EP400", "HIST1H4H", "CBX2", "TAF1", "MAP3K12", "…
731	CARBOHYDRATE METABOLIC PROCESS%GO%GO:0005975	0.000490984	0.00199282	0.477271	0.239702	1.84331	201	c("FMOD", "ST8SIA2", "OGN", "LUM", "OMD", "AGRN", "ST8SIA5", "KCNE1", "CHST6", "TSPAN8", "ABCC8", "CHSY3", "PRELP", "GPC6", "ST8SIA4", "B3GNT2", "EXT1", "HAS3", "ST6GALNAC1", "LRP5", "ALDH5A1", "ST6GAL2", "MGAT3", "APOD", "GFPT1", "ENO2", "SLC35A1", "COG7", "ST3GAL3", "SDC2", "GAL3ST3", "TPR", "CSPG5", "GSTO2", "HEXB", "OMA1", "IDS", "CHST14", "SEC31A", "GLCE", "GALNT11", "TRAK1", "NUP188", "B3GN…
732	CELL-SUBSTRATE ADHESION%GO%GO:0031589	0.000496135	0.00200951	0.477271	0.382903	2.09985	42	c("ANTXR1", "ECM2", "THY1", "SGCE", "COL13A1", "DDR1", "ITGA8", "BCAM", "ITGA10", "EPHB3", "COL3A1", "ADAMTS13", "THBS3", "PKD1", "VTN", "TSC1", "ACTN2", "SORBS1", "BRCA1")
733	NEGATIVE REGULATION OF PROTEIN MODIFICATION PROCESS%GO%GO:0031400	0.000496451	0.00200951	0.477271	0.275915	1.9345	113	c("SNCA", "SOX4", "THY1", "SFRP1", "BMP4", "UCHL1", "RGS4", "APOE", "STK38L", "IGFBP3", "CAPN3", "MYOCD", "LRP5", "CNKSR3", "FAM129A", "SOCS4", "DNMT3B", "NTF3", "DUSP6", "SFRP2", "FGFR1OP", "TP73", "DUSP16", "CAV3", "ANAPC10", "UBB", "MAD2L1", "UBE2D1", "BRCA1", "SIRT1", "DUSP8", "PHF1", "APC", "PARK2", "PSMD10", "SIN3A", "SMAD7", "ZNF675", "BCOR", "RGS3", "ARRB1", "PSMB10", "IGF1R", "DMD", "HHA…
734	REGULATION OF CALCIUM ION TRANSPORT%GO%GO:0051924	0.000499989	0.00201974	0.477271	0.387793	2.14553	43	c("SNCA", "THY1", "DRD4", "BCL2", "PKD2", "CAPN3", "SLC30A1", "CAMK2B", "CACNA2D1", "CAMK2G", "CCL5", "CAV3", "ASPH", "CACNA1D", "P2RX7", "F2R", "CAMK2D", "ZP3", "TRPC1", "DMD", "STIM2", "HOMER1", "RYR2", "CTNNB1", "SRI", "SLC8A1", "CASQ2", "PLN", "GSTM2", "MYLK", "CCL4")
735	POSITIVE REGULATION OF RAS GTPASE ACTIVITY%GO%GO:0032320	0.00050034	0.00201974	0.477271	0.425615	2.17808	33	c("SFRP1", "AGRN", "RABGAP1L", "NET1", "SIPA1L1", "ALDH1A1", "RALBP1", "ALS2", "NTF3", "LLGL1", "TSC1", "RASAL2", "TAX1BP3", "SYNGAP1", "USP6NL", "RASGRP3", "RAB3GAP1", "ARHGAP29", "SRGAP2", "TBC1D7", "NF1", "RASA1", "SYDE2", "PIN1", "DAB2IP", "PKP4")
736	MICROTUBULE CYTOSKELETON ORGANIZATION%GO%GO:0000226	0.000502555	0.00202592	0.477271	0.303337	1.99348	82	c("CENPA", "NDC80", "TPPP3", "BRSK1", "MAP4", "PKD2", "MID1", "PLK2", "NUSAP1", "FGF13", "ATXN3", "BICD1", "CETN3", "CEP68", "STMN1", "SPIRE1", "CNTROB", "BBS4", "DST", "PRC1", "TTLL3", "CDK5RAP2", "CROCC", "CLASP1", "MAPT", "KIF23", "CEP72", "DYNC1H1", "TUBGCP5", "BBS2", "HDAC3", "CETN2", "TUBE1", "TNKS", "NEK7", "SRGAP2", "SMC3", "CTNNB1", "NDE1", "DYNLT1", "PPP1R12A", "RNF19A", "GCC2", "FBXW5"…
737	REGULATION OF JNK CASCADE%GO%GO:0046328	0.00050325	0.00202597	0.477271	0.391136	2.12038	40	c("SFRP4", "MDFIC", "PAK1", "TPD52L1", "DIXDC1", "EDA2R", "TNIK", "FZD7", "MAP4K4", "DACT1", "PLCB1", "TP73", "MAPK8IP1", "DVL2", "ZMYND11", "DVL3", "RAP2A", "ZNF675", "HDAC3", "IGF1R", "TAOK1", "TRAF6", "MAP3K7")
738	COFACTOR METABOLIC PROCESS%GO%GO:0051186	0.000510931	0.00205411	0.477271	0.338044	2.08413	64	c("ELOVL4", "NMNAT2", "ATPIF1", "TP53I3", "FMO2", "ACOT4", "ACSS1", "BDH2", "THEM5", "NMNAT3", "CRYZL1", "NFE2L1", "MAT2B", "ACOT1", "UROS", "FECH", "PANK1", "LIAS", "SLC25A16", "MTHFD1", "NUDT12", "PPOX", "PPCS", "COX15", "MLYCD", "DHFRL1", "FMO1", "COQ3", "MCEE", "ACSM2A", "NAPRT1", "MOCS2", "SLC25A38", "DHFR", "NMNAT1", "ACOT8", "DGAT2", "PDHB", "ACSL6", "GPHN", "UROD", "DLAT", "AASDHPPT", "PP…
739	GUANYL-NUCLEOTIDE EXCHANGE FACTOR ACTIVITY%GO%GO:0005085	0.00051959	0.00208408	0.477271	0.346761	2.04595	54	c("PLCE1", "FARP1", "NET1", "TIAM2", "KIAA1244", "RGL1", "RASGRP1", "DENND2A", "PSD3", "FBXO8", "ALS2", "ARHGEF4", "HERC1", "RAPGEF6", "KALRN", "FGD5", "RCBTB2", "RIN2", "RALGPS1", "SOS2", "ARHGEF6", "MON2", "ARHGEF2", "FNIP1", "KCTD7", "FGD6", "RASGRP3", "PSD")
740	LIPID TRANSPORT%GO%GO:0006869	0.00051979	0.00208408	0.477271	0.386655	2.13923	43	c("APOE", "DRD4", "SLC27A6", "ACE", "APOA1", "SCARB1", "APOM", "APOD", "INHBA", "COL4A3BP", "CPT2", "CPT1B", "PRKAA2", "LCAT", "CLU", "SLC27A1", "LDLRAP1", "CD36", "PRKAB2", "APOC1", "SLC25A20", "SCP2", "ATP10D", "NPC1L1", "ATP11B", "ABCA1", "ATP9A", "VPS4B")
741	CELLULAR AMINO ACID METABOLIC PROCESS%GO%GO:0006520	0.000539028	0.00215473	0.477271	0.264985	1.8951	126	c("DIO2", "GATM", "GSTM5", "NOX4", "DDAH1", "ASPA", "CDO1", "CSAD", "LTC4S", "ALDH5A1", "ALDH4A1", "GSTA4", "GHR", "HGD", "IVD", "GAMT", "RARS2", "BCKDHA", "ABAT", "MGST3", "SLC27A1", "HMGCL", "MAT2B", "ACADSB", "PSPH", "HAAO", "ALDH6A1", "AUH", "PANK1", "SRR", "SLC25A16", "MTHFD1", "OAT", "STAT5B", "MTR", "PPCS", "GLS2", "YOD1", "TARS2", "HIBADH", "DHFRL1", "APIP", "HIBCH", "AFMID", "GLUD1", "HA…
742	REGULATION OF MITOTIC CELL CYCLE%GO%GO:0007346	0.000539575	0.00215473	0.477271	0.292131	1.98409	96	c("SOX4", "BMP4", "PRMT2", "PKD2", "APBB2", "PTPN3", "LRP5", "NUSAP1", "CRADD", "IGF1", "EDN3", "PPP1R1C", "TPR", "DACT1", "PKD1", "KANK2", "KIF20B", "ATM", "BUB1", "FHL1", "DAPK3", "ID2", "ANAPC10", "UBB", "MAD2L1", "UBE2D1", "CDKN1B", "SIRT1", "MYO16", "AFAP1L2", "PHIP", "DYNC1LI1", "APC", "APP", "PROX1", "TERF1", "PSMD10", "NPM2", "PSMB10", "BRD7", "PDXP", "IGF2", "NEK7", "DYNLT3", "PKN2", "PR…
743	PROTEIN TYROSINE KINASE ACTIVITY%GO%GO:0004713	0.000539591	0.00215473	0.477271	0.383749	2.12316	43	c("KIT", "EPHA3", "JAK2", "NTRK2", "WEE1", "CRIM1", "DDR1", "FYN", "EPHB3", "NRP1", "DYRK2", "BAZ1B", "ZAP70", "CLK1", "FGFR1OP", "FGFR2", "FGFR3", "EFNB3", "DDR2", "EPHA7", "EPHA5", "IGF1R")
744	TRANSMEMBRANE RECEPTOR PROTEIN SERINE/THREONINE KINASE SIGNALING PATHWAY%GO%GO:0007178	0.000541838	0.0021608	0.477271	0.348064	2.13448	63	c("FMOD", "BMP4", "GDF10", "RUNX2", "LEF1", "LEFTY2", "TGFB2", "GDF15", "TGFB3", "COL1A2", "SMAD9", "USP9Y", "PPP1R15A", "HPGD", "COL3A1", "TRIM33", "BMP6", "CDKN2B", "BMPR2", "MTMR4", "UBB", "GDF9", "UBE2D1", "BMPR1A", "TFDP2", "NEDD4L", "LTBP2", "SMAD7", "SMAD5", "CHRDL1", "MAGI2", "PPP1CB")
745	POTASSIUM CHANNELS%REACTOME%REACT_75908.1	0.000544993	0.00217046	0.477271	0.404388	2.10939	35	c("KCNA5", "KCNN3", "KCNMB1", "KCNMA1", "GNB3", "KCNS3", "ABCC8", "KCNA4", "KCNC4", "KCNK6", "KCNMB4", "KCNMB2", "GNG2", "KCNK17", "KCNS1", "HCN2", "GABBR1", "KCNJ2")
746	SUBSTRATE-SPECIFIC CHANNEL ACTIVITY%GO%GO:0022838	0.000548959	0.00218332	0.477271	0.291907	1.98257	96	c("KCNA5", "GRIA3", "HTR2B", "SCN2B", "KCNT2", "KCNE1", "KCNMA1", "CHRNA3", "GLRB", "KCNS3", "SCN3B", "SCN4B", "KCNA4", "PKD2", "KCNC4", "KCNK6", "RYR3", "PKD1L1", "KCNMB4", "CACNA2D1", "TPCN1", "KCNMB2", "GRIA1", "TRPM4", "PKD1", "GRIK4", "SHROOM2", "KCNK17", "KCNS1", "ITPR1", "SCN3A", "LOXHD1", "CACNA1D", "HCN2", "P2RX7", "ZP3", "GAS6", "ANO1", "TRPC1", "REST", "STIM2")
747	NEGATIVE REGULATION OF DNA BINDING%GO%GO:0043392	0.000558262	0.00221735	0.477271	0.548386	2.16868	16	c("JAK2", "LEF1", "GZMA", "SMO", "MDFI", "RSF1", "NFIB", "SIN3A", "ZNF675", "SP100", "TNKS", "HABP4")
748	MICROTUBULE ASSOCIATED COMPLEX%GO%GO:0005875	0.000569227	0.00225788	0.477271	0.395129	2.11316	39	c("MAP1A", "MAP4", "MID1", "DNALI1", "DYNC1LI2", "MAP2", "DYNC2LI1", "DNAH1", "KIF3C", "TPR", "RABGAP1", "DYNLL1", "KIF5B", "CLIP2", "MAPT", "KIF23", "KIF15", "DYNC1H1", "DYNC1LI1", "STAU1", "KLC1")
749	CYTOKINESIS%GO%GO:0000910	0.000579302	0.00229478	0.477271	0.398488	2.10038	36	c("MYH10", "KLHL13", "KIF13A", "CKAP2", "SPTBN1", "RAB11FIP3", "NUSAP1", "PLK3", "SPIRE1", "CNTROB", "BBS4", "DAPK3", "PRC1", "KIF23", "APC", "PIK3C3", "NEK7", "ZFYVE26", "BECN1", "KLHL21", "CHMP1A", "ARHGEF11", "RASA1", "STAMBP", "ARL3", "AURKC")
750	RESPONSE TO DNA DAMAGE STIMULUS%GO%GO:0006974	0.000582172	0.00230307	0.477271	0.231354	1.78672	207	c("SOX4", "CCND1", "SPATA18", "GADD45A", "BRSK1", "RAD51AP1", "BCL2", "XPC", "MAPK12", "PPP1R15A", "CRADD", "EYA1", "ING4", "ATXN3", "HMGB2", "CRY2", "PLK3", "DDIT3", "MSH2", "DYRK2", "FBXO31", "ATM", "BAZ1B", "ERCC5", "PMS1", "TP73", "FANCL", "SETMAR", "UBB", "TAF1", "BRCA1", "CDKN1B", "SIRT1", "USP28", "EP300", "PHF1", "RAD54L", "MYO6", "XPA", "APC", "POLR2G", "DDB2", "PSMD10", "REV3L", "RAD21"…
751	REGULATION OF RELEASE OF CYTOCHROME C FROM MITOCHONDRIA%GO%GO:0090199	0.000592036	0.00233898	0.477271	0.546062	2.15949	16	c("HRK", "TNFSF10", "MLLT11", "IGF1", "BCL2L11", "FAM162A", "BMF", "MFF", "PARK2", "PSMD10", "AKT1", "BBC3", "OPA1")
752	CELLULAR MODIFIED AMINO ACID METABOLIC PROCESS%GO%GO:0006575	0.000595777	0.00234699	0.477271	0.366233	2.08185	47	c("DIO2", "GATM", "GSTM5", "NOX4", "DDAH1", "LTC4S", "ALDH5A1", "ALDH4A1", "GSTA4", "GHR", "GAMT", "MGST3", "SLC27A1", "MAT2B", "PANK1", "SLC25A16", "MTHFD1", "STAT5B", "PPCS", "DHFRL1", "TG", "MGST2", "AADAT", "SERINC1", "GCLC", "DHFR", "GOT2", "HAGH", "GSTM2", "PCYOX1", "DDAH2", "MUT", "AASDHPPT", "PPCDC", "EGLN3", "GGT7", "MTHFS")
753	EMBRYONIC EPITHELIAL TUBE FORMATION%GO%GO:0001838	0.000596438	0.00234699	0.477271	0.554488	2.15143	15	c("SOX4", "SOX8", "PRICKLE1", "SOX9", "BBS4", "STIL", "FZD6", "FZD3", "DVL2", "COBL", "PLXNB2", "CTNNB1", "GATA3")
754	EPITHELIAL TUBE FORMATION%GO%GO:0072175	0.000596438	0.00234699	0.477271	0.554488	2.15143	15	c("SOX4", "SOX8", "PRICKLE1", "SOX9", "BBS4", "STIL", "FZD6", "FZD3", "DVL2", "COBL", "PLXNB2", "CTNNB1", "GATA3")
755	NEGATIVE REGULATION OF TRANSPORT%GO%GO:0051051	0.000600797	0.00235258	0.477271	0.315333	2.0462	77	c("SFRP4", "SNCA", "SOX4", "SFRP1", "MDFIC", "CRHBP", "DRD4", "RAB23", "APOA1", "RSAD2", "PKD2", "DACT3", "SLC30A1", "SCAMP5", "APOD", "INHBA", "GRB10", "TPR", "PLA2R1", "DYRK2", "PKD1", "PTGER4", "PRKD1", "WWP2", "ACTN2", "CAV3", "PACSIN3", "SIRT4", "MDFI", "APOC1", "F2R", "PSMD10", "GAS6", "REST", "AKT1", "ITGAV", "SERGEF", "GOPC", "SRI", "NF1", "C1QTNF3", "CASQ2", "CD74", "PLN", "MXI1", "GSTM2…
756	REGULATION OF CELLULAR RESPONSE TO STRESS%GO%GO:0080135	0.000600955	0.00235258	0.477271	0.29097	1.99318	100	c("SFRP4", "MDFIC", "IER3", "PAK1", "TGFB2", "TPD52L1", "DIXDC1", "MID1", "ANKRD1", "EDA2R", "TNIK", "EYA1", "FZD7", "ULK1", "MAP4K4", "PLA2R1", "NRBP2", "DACT1", "ATM", "NUAK1", "SMYD2", "PLCB1", "TP73", "MAPK8IP1", "DVL2", "SETMAR", "ZMYND11", "DVL3", "BRCA1", "SIRT1", "SUPT5H", "ZKSCAN3", "NSMCE1", "RAP2A", "PSMD10", "ZNF675", "RAB33B", "HDAC3", "IGF1R", "PAFAH1B2", "TERF2IP", "TAOK1", "TRAF6"…
757	MEIOTIC SYNAPSIS%REACTOME%REACT_75792.1	0.0006011	0.00235258	0.477271	0.437188	2.10281	27	c("HSPA2", "HIST1H2AC", "REC8", "HIST1H2BC", "HIST1H2BG", "STAG2", "HIST1H2AE", "HIST1H4H", "BRCA1", "HIST1H4E", "SYNE2", "TERF1", "HIST1H2BD", "RAD21", "STAG3", "TERF2IP", "SMC3", "HIST2H2BE")
758	GATED CHANNEL ACTIVITY%GO%GO:0022836	0.000602039	0.00235258	0.477271	0.313235	2.01384	74	c("KCNA5", "GRIA3", "SCN2B", "KCNT2", "KCNE1", "KCNMA1", "CHRNA3", "GLRB", "KCNS3", "SCN3B", "SCN4B", "KCNA4", "PKD2", "KCNC4", "KCNK6", "RYR3", "KCNMB4", "CACNA2D1", "TPCN1", "KCNMB2", "GRIA1")
759	ION GATED CHANNEL ACTIVITY%GO%GO:0022839	0.000602039	0.00235258	0.477271	0.313235	2.01384	74	c("KCNA5", "GRIA3", "SCN2B", "KCNT2", "KCNE1", "KCNMA1", "CHRNA3", "GLRB", "KCNS3", "SCN3B", "SCN4B", "KCNA4", "PKD2", "KCNC4", "KCNK6", "RYR3", "KCNMB4", "CACNA2D1", "TPCN1", "KCNMB2", "GRIA1")
760	COENZYME METABOLIC PROCESS%GO%GO:0006732	0.000603033	0.00235258	0.477271	0.350426	2.01917	50	c("ELOVL4", "NMNAT2", "TP53I3", "FMO2", "ACOT4", "ACSS1", "THEM5", "NMNAT3", "MAT2B", "ACOT1", "PANK1", "LIAS", "SLC25A16", "MTHFD1", "NUDT12", "PPCS", "MLYCD", "DHFRL1", "FMO1", "COQ3", "MCEE", "ACSM2A", "NAPRT1", "MOCS2", "DHFR", "NMNAT1", "ACOT8", "DGAT2", "PDHB", "ACSL6", "GPHN", "DLAT", "AASDHPPT", "PPCDC", "MTHFS", "OXSM", "COQ2", "RPE", "ACSL1", "SUCLG2")
761	REGULATION OF DEFENSE RESPONSE%GO%GO:0031347	0.000603408	0.00235258	0.477271	0.290072	1.9738	98	c("PROS1", "CFH", "JAK2", "APOE", "ACE2", "HERC5", "IFIT1", "COLEC12", "APOA1", "MASP1", "APOBEC3G", "FYN", "PACS1", "APOBEC3F", "IL33", "PTPN11", "PELI2", "DDX60", "TNIP1", "APOD", "HLA-DRB1", "CD247", "POLR3B", "CADM1", "DUSP6", "PTGER4", "CCL5", "NLRP1", "MEF2C", "MAP3K1", "UBB", "PTGER3", "MAPK10", "SIN3A", "ELMOD2", "ZP3", "PIAS1", "ERAP1", "KLKB1", "ATF1", "POLR3F", "TRAF6", "MAP3K7", "AP2M…
762	G ALPHA (12 13) SIGNALLING EVENTS%REACTOME%REACT_18407.5	0.000607462	0.00236527	0.477271	0.42328	2.16613	33	c("GNB3", "NET1", "PIK3R1", "TIAM2", "ARHGEF3", "MCF2", "GNG11", "ARHGEF12", "ARHGEF4", "KALRN", "AKAP13", "ARHGEF9", "GNG2", "OBSCN", "SOS2", "ARHGEF6", "ARHGEF2", "PIK3R2", "ROCK1")
763	REGULATION OF G-PROTEIN COUPLED RECEPTOR PROTEIN SIGNALING PATHWAY%GO%GO:0008277	0.000622196	0.00241947	0.477271	0.446783	2.07926	25	c("HTR2B", "PLCE1", "SNCA", "RGS4", "RGS11", "RGS5", "RGS6", "BICD1", "PLCB1", "GRK4", "CCL5", "RGS3", "ARRB1", "LRRK2", "ADM", "GNG7")
764	LIGASE ACTIVITY%GO%GO:0016874	0.000623206	0.00242022	0.477271	0.254325	1.83895	139	c("HERC5", "SLC27A6", "MYLIP", "HECW2", "UBE2H", "KLHL13", "HERC6", "FBXL14", "RNF103", "RNF217", "BTRC", "UBE2Q2", "TRIM33", "LMO7", "HECTD2", "RNF20", "FBXO4", "ACSS1", "TRIM2", "RNF146", "MTHFD2L", "WWP2", "FANCL", "ANAPC10", "FBXW11", "ATPBD4", "TTLL3", "FBXO21", "UBE2D1", "PIAS2", "BRCA1", "BTD", "NSMCE1", "UBE2W", "TTC3", "TTLL1", "LIAS", "DDB2", "FBXO9", "PARK2", "NEDD4L", "MTHFD1", "RNF25…
765	PROTEIN COMPLEX SUBUNIT ORGANIZATION%GO%GO:0071822	0.000627384	0.00243327	0.477271	0.222836	1.75758	238	c("FMOD", "CENPA", "JAK2", "DPYSL3", "NDC80", "FSCN1", "CHRNA3", "MYH11", "COLEC12", "MAP4", "KIF13A", "RPS4Y1", "CAPN3", "RYR3", "EVL", "LIMA1", "DLG4", "PLK2", "ALDH5A1", "SOX9", "SHANK1", "FGF13", "GSN", "ATPIF1", "MDM4", "HLA-DRB1", "CBR4", "BBS10", "TPR", "PILRB", "STMN1", "SPIRE1", "FCHO2", "LRRC6", "LLGL1", "SH3BGR", "CCL5", "SHROOM2", "ACTN2", "AR", "SHROOM1", "PRC1", "HBA2", "RPL31", "SO…
766	POSITIVE REGULATION OF REPRODUCTIVE PROCESS%GO%GO:2000243	0.000646402	0.00250375	0.477271	0.373352	2.08697	44	c("MDFIC", "LEF1", "IFIT1", "SOX9", "INHBA", "PLCB1", "CCL5", "GTF2F2", "SUPT16H", "SUPT5H", "PPIH", "EP300", "RSF1", "POLR2G", "ZP3", "NPM2", "ERCC2", "GTF2H1", "POLR2C", "VAPB", "CTNNB1", "POLR2A", "GTF2H3", "POLR2I", "PPID", "MNAT1", "POLR2K", "TCEA1", "SUPT4H1", "CDK7", "POLR2L", "WT1", "ERCC3", "TFAP4")
767	SEQUENCE-SPECIFIC DNA BINDING%GO%GO:0043565	0.000654197	0.00253064	0.477271	0.28075	1.94335	106	c("SOX4", "ESR1", "MEOX2", "TCF4", "LEF1", "DBP", "BCL2", "CRIP1", "SOX8", "FOXC2", "PIF1", "MYOCD", "NR2F1", "SOX9", "LMO2", "GABPA", "TCF7L2", "PURA", "ELK3", "HDAC4", "PRDM5", "TBX3", "MEF2C", "TAF1", "THAP9", "MLL", "ZKSCAN3", "TERF1", "HHEX", "CLOCK", "ESRRB", "REST", "TERF2IP", "HAND2", "ZNF148", "USF2", "OBFC1", "HLX", "ZNF281", "MEF2A", "POU5F1", "GATA4", "FOXP2", "MEF2D", "FOXO4", "PAX6"…
768	FOXO FAMILY SIGNALING%PATHWAY INTERACTION DATABASE NCI-NATURE CURATED DATA%FOXO FAMILY SIGNALING	0.000655623	0.00253286	0.477271	0.471956	2.13568	23	c("GADD45A", "MST1", "FBXO32", "BCL2L11", "ZFAND5", "YWHAQ", "SKP2", "CDKN1B", "SIRT1", "EP300", "MAPK10", "CAT", "AKT1", "FOXO4", "CTNNB1", "G6PC", "RBL2")
769	PLATELET HOMEOSTASIS%REACTOME%REACT_23876.2	0.000675915	0.00260785	0.477271	0.390976	2.07406	38	c("PDE5A", "PDE1A", "KCNMB1", "KCNMA1", "GNB3", "KCNMB4", "PTPN11", "PDE6A", "GNG11", "KCNMB2", "PDE3B", "GUCY1A3", "PPP2R1B", "GNG2", "PDE6B", "ATP2B1")
770	APICAL PART OF CELL%GO%GO:0045177	0.000678198	0.00261326	0.477271	0.376192	2.08135	43	c("FZD2", "SLC26A4", "THY1", "KCNMA1", "DPP4", "CA4", "FZD1", "DYNC2LI1", "FZD7", "IFIT5", "TJP1", "SLC22A18", "VCAM1", "FZD6", "ABCB4", "SHROOM2", "FZD3", "DVL2")
771	HEMOPOIESIS%GO%GO:0030097	0.000688305	0.00264877	0.477271	0.306709	2.02447	84	c("KIT", "SOX4", "SFRP1", "JAK2", "BMP4", "LEF1", "TGFB2", "HDAC9", "ACE", "RSAD2", "SNRK", "GAB2", "WNT2B", "ATPIF1", "INHBA", "VCAM1", "CDKN2B", "MSH2", "PTGER4", "ATM", "SFRP2", "JAG1", "ZAP70", "HDAC5", "ZNF160", "HDAC4", "FGFR2", "MEF2C", "TPD52", "MLL", "FNIP1", "KITLG", "FOXP1", "HHEX", "GAS6", "AICDA", "ARIH2", "CTNNB1", "TIRAP", "VEGFA", "ATP7A", "MLF1", "VPS33A", "SLC25A38", "BCL11A", "…
772	PEPTIDE BINDING%GO%GO:0042277	0.000691642	0.00265816	0.477271	0.39368	2.08655	37	c("NPR3", "MME", "APOE", "CRHBP", "TGFB2", "APOA1", "PCSK5", "CRIP1", "APBB2", "PIK3R1", "INHBA", "HLA-DRB1", "PEX7", "GHR", "PPIG", "LDLRAP1", "PPIH", "ITM2C", "IGF1R", "BRAP", "LANCL1")
773	REGULATION OF VIRAL REPRODUCTION%GO%GO:0050792	0.000694401	0.00266532	0.477271	0.340604	2.00962	54	c("MDFIC", "LEF1", "IFIT1", "RNASEL", "APOBEC3G", "RSAD2", "APOBEC3F", "TNIP1", "CCL5", "GTF2F2", "APOBEC3C", "SUPT16H", "SUPT5H", "PPIH", "EP300", "RSF1", "POLR2G", "PROX1", "SP100", "REST", "ERCC2", "GTF2H1", "POLR2C", "VAPB", "POLR2A", "GTF2H3", "POLR2I", "PPID", "MNAT1", "POLR2K", "TCEA1", "SUPT4H1", "OAS1", "CDK7", "CCL4", "POLR2L", "OAS3", "ERCC3", "TFAP4", "TNF")
774	REGULATION OF LIPID METABOLISM BY PEROXISOME PROLIFERATOR-ACTIVATED RECEPTOR ALPHA (PPARALPHA)%REACTOME%REACT_19241.2	0.00069893	0.00267923	0.477271	0.336657	2.01703	57	c("APOA1", "TIAM2", "ANKRD1", "RGL1", "RORA", "CPT2", "MED30", "TBL1XR1", "ABCB4", "SLC27A1", "PPARGC1A", "CD36", "EP300", "MED12", "NCOA2", "NFYC", "ACADM", "PPARGC1B", "SIN3A", "HDAC3", "CLOCK", "CHD9", "MED6", "CDK8", "MED11", "FDFT1", "ABCA1", "MED13", "SMARCD3", "MED21", "CCNC", "NFYA", "MED4", "PEX11A", "SREBF2", "PPARA", "NFYB", "CTGF", "MED23", "MED15", "NCOR1", "YAP1", "ACSL1", "FHL2", "…
775	NEGATIVE REGULATION OF MAPK CASCADE%GO%GO:0043409	0.000702551	0.00268964	0.477271	0.383473	2.07884	40	c("SFRP4", "BMP4", "UCHL1", "RGS4", "APOE", "STK38L", "CNKSR3", "TNIP1", "DACT1", "DUSP6", "TP73", "DUSP16", "CAV3", "ZMYND11", "DUSP8", "P2RX7", "PSMD10", "ZNF675", "HDAC3", "RGS3", "IGF1R", "NF1", "RGS14", "PPP2R1A", "MBIP", "PIN1", "DAB2IP", "DUSP3", "PPP2CA")
776	REGULATION OF ACTIN CYTOSKELETON ORGANIZATION%GO%GO:0032956	0.000707862	0.00270648	0.477271	0.347985	2.02271	51	c("PLEKHH2", "EPHA3", "SFRP1", "PAK1", "KANK1", "LIMA1", "GSN", "AMOT", "RICTOR", "NTF3", "NEB", "PTGER4", "TSC1", "DAPK3", "CAV3", "CDK5", "ALMS1", "SYNPO", "PROX1", "PARK2", "ROCK1", "EPHA5", "JMY", "PDXP", "PPM1E", "FHOD1", "TWF2")
777	PROTEIN KINASE BINDING%GO%GO:0019901	0.000709873	0.00271067	0.477271	0.272153	1.9112	114	c("KCNA5", "CCND1", "JAK2", "STK38L", "PTPRR", "HDAC9", "CCND2", "DIXDC1", "DACT3", "DACT2", "SOX9", "TNIP1", "TNNI3", "PDE3B", "TPR", "GATA6", "GHR", "TCF7L2", "CDKN2B", "DACT1", "LLGL1", "MSH2", "PKD1", "DOK7", "HDAC5", "FGFR1OP", "TP73", "MAPK8IP1", "MAP3K1", "PRC1", "CDK5RAP2", "MAP3K12", "SIRT1", "PFKFB2", "APC", "CDKN2C", "PARK2", "GYS1", "PKP2", "ILK", "SQSTM1", "PPP1CB", "TWF2", "IBTK", "…
778	IFN-GAMMA PATHWAY%PATHWAY INTERACTION DATABASE NCI-NATURE CURATED DATA%IFN-GAMMA PATHWAY	0.000713446	0.00272082	0.477271	0.502843	2.07636	18	c("JAK2", "PIK3R1", "CAMK2B", "PTPN11", "CAMK2G", "MAP3K1", "CAMK2A", "EP300", "CAMK2D", "SMAD7", "PIAS1", "RAP1A", "AKT1")
779	MYOSIN COMPLEX%GO%GO:0016459	0.000721403	0.00274763	0.477271	0.550902	2.13752	15	c("MYL1", "MYL7", "MYH10", "MYL5", "MYO1C", "SHROOM1", "MYOM1", "BMF", "MYO6", "MYL6B", "MYL9")
780	SMALL GTPASE REGULATOR ACTIVITY%GO%GO:0005083	0.000729059	0.00277323	0.477271	0.324467	2.0132	65	c("HTR2B", "THY1", "FARP1", "RABGAP1L", "ALDH1A1", "ARHGAP1", "KIAA1244", "RGL1", "DENND2A", "RALBP1", "PSD3", "FBXO8", "ALS2", "ARHGEF4", "HERC1", "LLGL1", "RCBTB2", "RIN2", "RASAL2", "SYNGAP1", "ARHGEF6", "MON2", "ARHGEF2", "KCTD7", "TBC1D15", "USP6NL", "RASGRP3", "PSD", "RAB3GAP1", "ARHGAP29", "SRGAP2", "KRIT1", "SERGEF", "NF1", "SBF2", "RASGEF1B", "ARHGEF11", "RASA1", "SYDE2")
781	PROTEIN MODIFICATION BY SMALL PROTEIN CONJUGATION%GO%GO:0032446	0.000731785	0.00278003	0.477271	0.256401	1.88204	150	c("HERC5", "ENC1", "BCL2", "MYLIP", "HECW2", "UBE2H", "KLHL13", "ASB9", "HERC6", "FBXL14", "RNF103", "RNF217", "EYA1", "BTRC", "UBE2Q2", "KLHL7", "TRIM33", "TRPM4", "LMO7", "HECTD2", "RNF20", "FBXO4", "RNF146", "CRBN", "WWP2", "KLHL12", "FANCL", "ANAPC10", "FBXW11", "UBB", "FBXO21", "UBE2D1", "PIAS2", "BRCA1", "SIRT1", "NFE2L2", "NSMCE1", "UBE2W", "TTC3", "DDB2", "FBXO9", "PARK2", "NEDD4L", "PSMD…
782	NEUROTROPHIC FACTOR-MEDIATED TRK RECEPTOR SIGNALING%PATHWAY INTERACTION DATABASE NCI-NATURE CURATED DATA%NEUROTROPHIC FACTOR-MEDIATED TRK RECEPTOR SIGNALING	0.000740906	0.00281108	0.477271	0.45405	2.08322	24	c("CCND1", "BDNF", "NTRK2", "PIK3R1", "DOCK1", "PTPN11", "GAB2", "GAB1", "NTF3", "FRS3", "FAIM", "NEDD4L", "GIPC1", "SQSTM1", "RAP1A", "DYNLT1", "RASA1", "PIK3CA")
783	LEPTIN%NETPATH%LEPTIN	0.00074912	0.00283862	0.477271	0.373659	2.04177	41	c("SOCS2", "JAK2", "ESR1", "RUNX2", "LEPR", "FYN", "PIK3R1", "PTPN11", "SP3", "PRKAA2", "CDK5", "CISH", "MAPT", "PRKAB2", "EP300", "PIK3R2", "CFL2", "STAT5B", "IGF1R", "KHDRBS1", "ATF1", "SH2B1", "AKT1")
784	LIPID LOCALIZATION%GO%GO:0010876	0.000754956	0.00285709	0.477271	0.356817	2.01083	46	c("APOE", "DRD4", "SLC27A6", "ACE", "APOA1", "SCARB1", "APOM", "APOD", "INHBA", "COL4A3BP", "CPT2", "CPT1B", "PRKAA2", "LCAT", "CLU", "SLC27A1", "LDLRAP1", "CD36", "PRKAB2", "APOC1", "SLC25A20", "SCP2", "ATP10D", "NPC1L1", "ATP11B", "ABCA1", "ATP9A", "VPS4B", "GOT2", "DGAT2")
785	REGULATION OF MAP KINASE ACTIVITY%GO%GO:0043405	0.000763212	0.00288465	0.477271	0.309064	1.98702	74	c("HTR2B", "PLCE1", "KIT", "BMP4", "UCHL1", "MDFIC", "RGS4", "APOE", "STK38L", "DRD4", "PAK1", "TPD52L1", "CXCR4", "MAP2K5", "EDN3", "GHR", "NTF3", "DUSP6", "ADORA2B", "FGF2", "TP73", "DUSP16", "CAV3", "DVL2", "UBB", "DVL3", "DUSP8", "S1PR2", "MAPK10", "ZNF675", "RGS3", "LRRK2", "PIK3CG", "TRAF6", "MAP3K7", "UBC", "VEGFA", "NF1", "RGS14", "PPP2R1A", "MBIP", "DAB2IP", "DUSP3", "TRIB2", "PPP2CA", "…
786	NEPHRON DEVELOPMENT%GO%GO:0072006	0.000764895	0.00288733	0.477271	0.468377	2.08503	22	c("PLCE1", "PROM1", "SULF1", "BMP4", "SOX8", "PKD2", "SULF2", "SOX9", "SMO", "PKD1", "MEF2C")
787	REGULATION OF TRANSMEMBRANE TRANSPORT%GO%GO:0034762	0.000772096	0.00291081	0.477271	0.339626	2.00386	54	c("KCNA5", "SCN2B", "CRHBP", "DRD4", "KCNE1", "SCN3B", "SCN4B", "BCL2", "PKD2", "SLC30A1", "DLG4", "SHANK1", "WWP2", "FHL1", "ACTN2", "CAV3", "ASPH", "CACNA1D", "NLGN1", "NEDD4L", "CAMK2D", "NLGN3", "ZP3", "DMD", "STIM2", "HOMER1", "AKT1", "RYR2", "CTNNB1")
788	IMMUNE SYSTEM%REACTOME%REACT_6900.7	0.000773924	0.002914	0.477271	0.193727	1.61742	404	c("KIT", "PROS1", "CFH", "CTSK", "SOCS2", "JAK2", "PDE1A", "ENAH", "PAK1", "IFIT2", "HERC5", "IFIT1", "HBEGF", "SH3GL2", "CTSO", "FGF1", "FGF18", "RNASEL", "BCL2", "MASP1", "UBE2H", "FYN", "PDE1C", "WSB1", "KLHL13", "PIK3R1", "ASB9", "DOCK1", "CAMK2B", "XAF1", "PTPN11", "EVL", "DYNC1LI2", "PELI2", "MAPK12", "MYO10", "IRF6", "GAB2", "GBP4", "DYNC2LI1", "MKRN1", "BTRC", "RASGRP1", "HLA-DRB5", "HLA-…
789	CARDIOCYTE DIFFERENTIATION%GO%GO:0035051	0.000778813	0.00292526	0.477271	0.430471	2.0705	27	c("TGFB2", "MYOCD", "SMO", "GATA6", "CSRP3", "CBY1", "JAG1", "MEF2C", "MESP1", "PROX1", "FOXP1", "REST", "HAND2", "MEF2A", "POU5F1", "GATA4", "OBSL1", "SLC8A1", "VEGFA")
790	REGULATION OF INSULIN SECRETION%GO%GO:0050796	0.000778886	0.00292526	0.477271	0.373026	2.03831	41	c("KCNA5", "SOX4", "SFRP1", "CACNA2D2", "KCNS3", "ABCC8", "LRP5", "MARCKS", "MYRIP", "HLA-DRB1", "TCF7L2", "ITPR1", "SIRT4", "GCK", "CACNA1D", "EPHA5", "GPLD1", "REST", "SLC25A5", "RAP1A", "PRKCA", "GLUD1", "PRKAR1B", "VAMP2")
791	LEUKOCYTE MIGRATION%GO%GO:0050900	0.000783222	0.00293725	0.477271	0.324189	1.97217	60	c("KIT", "PROS1", "JAM2", "TGFB2", "SCG2", "COL1A2", "ATP1B2", "FYN", "PIK3R1", "CXCR4", "PTPN11", "CD47", "PODXL2", "JAM3", "EDN3", "TRPM4", "VCAM1", "CCL5", "ZAP70", "BSG", "PIK3R2", "SIRPG", "ROCK1", "GAS6", "PIK3CG", "ITGAV", "SLC7A6", "SLC16A8", "COL1A1", "VEGFA", "GATA3", "OLR1", "LYST", "PIK3CA")
792	NUCLEOSIDE-TRIPHOSPHATASE ACTIVITY%GO%GO:0017111	0.00078465	0.00293725	0.477271	0.235061	1.79544	189	c("KIF1A", "ABCG2", "TNNT3", "GNB3", "RAB23", "MYL7", "MYH10", "ATP1B2", "KIF13A", "MYO5B", "PIF1", "DNALI1", "GNG11", "MYO10", "RECQL", "DNAH1", "KIF3C", "SMARCA2", "RALBP1", "DYNC2H1", "GNAI1", "ATP7B", "BBS4", "MSH2", "RND3", "KIF20B", "ABCB4", "PEX1", "GEM", "MCM4", "RAB33A", "KIF5B", "KIF7", "PMS1", "MACF1", "CLU", "ABCA2", "RRAS", "RAB28", "DDX17", "ATP1A2", "RAB30", "PEX6", "KIF15", "RSF1"…
793	REGULATION OF STEROID METABOLIC PROCESS%GO%GO:0019218	0.000785048	0.00293725	0.477271	0.496861	2.12311	20	c("APOE", "ACADL", "FGF1", "APOA1", "EPHX2", "BMP6", "SIRT1", "LDLRAP1", "APOC1", "PROX1", "DKK3", "REST", "SCP2")
794	POTASSIUM CHANNEL ACTIVITY%GO%GO:0005267	0.000787154	0.00293772	0.477271	0.418195	2.07988	30	c("KCNA5", "KCNT2", "KCNE1", "KCNMA1", "KCNS3", "KCNA4", "PKD2", "KCNC4", "KCNK6", "KCNMB4", "KCNMB2")
795	RAS PROTEIN SIGNAL TRANSDUCTION%GO%GO:0007265	0.000787154	0.00293772	0.477271	0.418652	2.08215	30	c("PLCE1", "COL1A2", "ARHGEF3", "ARHGAP1", "MAPK12", "PLK2", "RASGRP1", "IGF1", "RAPGEF6", "MRAS", "FGF2", "RRAS", "TAX1BP3", "ARHGDIG", "RAP2A", "ROCK1", "ARHGAP29", "BRAP", "CCNA2", "NF1", "ARHGEF11")
796	ION TRANSMEMBRANE TRANSPORT%GO%GO:0034220	0.000798657	0.00297691	0.477271	0.314002	2.03327	76	c("KCNA5", "HTR2B", "SCN2B", "KCNT2", "KCNE1", "KCNMA1", "GLRB", "GABRB1", "ABCC8", "SCN3B", "SCN4B", "ATP1B2", "SLC40A1", "PKD2", "SLC30A1", "RYR3", "CPT2", "CPT1B", "ATP7B", "ARHGEF9", "PRKAA2", "ATP2B1", "CAV3", "ASPH", "ATP1A2", "CD36", "PRKAB2", "GABRA4", "CACNA1D", "ATP2A3", "ATP2C1", "SLC25A20", "ZP3", "GAS6", "GJA1", "ATP10D", "ITGAV", "SLC16A8", "ATP11B", "SLC8A1", "ATP7A", "ATP5L")
797	CYCLIC NUCLEOTIDE METABOLIC PROCESS%GO%GO:0009187	0.000806291	0.00300159	0.477271	0.538998	2.13155	16	c("HTR2B", "PDE5A", "NPPA", "NPPB", "RAMP2", "PDE3B", "PTHLH", "PDE8B", "ADCY2")
798	CHROMATIN%GO%GO:0000785	0.000821086	0.00305284	0.477271	0.296522	1.9759	88	c("RUNX2", "HIST1H2AC", "MYCN", "CCND2", "CBX7", "MCM2", "PPP1R10", "HIST1H2BC", "NCAPD3", "MPHOSPH8", "HIST1H2BG", "SMARCA2", "PSIP1", "RNF20", "GABPA", "TCF7L2", "STAG2", "PLCB1", "H1FX", "HIST1H2AE", "HIST1H4H", "TP73", "AR", "SIRT1", "HIST1H4E", "TTC37", "PCGF2", "NFRKB", "SIN3A", "CENPC1", "NPM2", "ARRB1", "HAND2", "SMC3", "MEF2A", "HIST2H2BE", "PAX6", "TBP", "MCM7", "SMARCD3", "GATA3", "PHF…
799	REGULATION OF PEPTIDE HORMONE SECRETION%GO%GO:0090276	0.000836607	0.00310456	0.477271	0.372745	2.06227	43	c("KCNA5", "SOX4", "SFRP1", "CRHBP", "CACNA2D2", "KCNS3", "ABCC8", "LRP5", "MARCKS", "MYRIP", "HLA-DRB1", "TCF7L2", "ITPR1", "SIRT4", "GCK", "CACNA1D", "EPHA5", "GPLD1", "REST", "SLC25A5", "RAP1A", "PRKCA", "GLUD1", "PRKAR1B", "VAMP2")
800	GLYCOSPHINGOLIPID METABOLIC PROCESS%GO%GO:0006687	0.000837768	0.00310456	0.477271	0.462245	2.18298	26	c("ST8SIA2", "ST8SIA5", "ARSJ", "ST8SIA4", "ALDH5A1", "ASAH1", "ARSD", "HEXB", "ARSG", "HEXA", "SMPD3", "ARSI", "STS", "ST6GALNAC6", "NEU3", "SUMF1")
801	POSITIVE REGULATION OF MAPK CASCADE%GO%GO:0043410	0.000838138	0.00310456	0.477271	0.305896	2.0247	85	c("HTR2B", "PLCE1", "KIT", "MDFIC", "DRD4", "PAK1", "TGFB2", "NTRK2", "TPD52L1", "MID1", "CXCR4", "EDA2R", "PELI2", "MAP2K5", "FZD7", "IGF1", "EDN3", "P2RY1", "GHR", "NTF3", "PLCB1", "ADORA2B", "FGF2", "FGFR2", "DVL2", "UBB", "DVL3", "FGFR3", "S1PR2", "MAPK10", "F2R", "ARRB1", "GAS6", "LRRK2", "IGF2", "TAOK1", "PIK3CG", "PRKCA", "TRAF6", "MAP3K7", "FBXW7", "CTNNB1")
802	TRANS-GOLGI NETWORK%GO%GO:0005802	0.000847993	0.00313715	0.477271	0.33895	1.99428	53	c("CA4", "KIF13A", "CLIP3", "KIAA1244", "SCAMP5", "HLA-DRB5", "BICD1", "HLA-DRB1", "PSD3", "FBXO8", "ATP7B", "LLGL1", "CBY1", "PRKD1", "CLTCL1", "WIPI1", "RAB30", "FAM109A", "MON2", "ATP2C1", "BIRC6", "PSD", "OPTN", "DPY30", "GOLGA4", "ATP9A", "ATP7A", "GCC2", "HLA-DPB1", "HLA-DRA", "CD74", "ARL1", "RAB31", "RAB6A", "SCOC", "CLASP2")
803	B CELL ACTIVATION%GO%GO:0042113	0.00085005	0.00314084	0.477271	0.437453	2.12507	28	c("KIT", "LEF1", "HDAC9", "BCL2", "VCAM1", "MSH2", "ATM", "ZAP70", "HDAC5", "HDAC4", "MEF2C", "TPD52", "FNIP1", "FOXP1", "HHEX", "AICDA")
804	NUCLEOSIDE PHOSPHATE BINDING%GO%GO:1901265	0.000858067	0.00315832	0.477271	0.230675	1.77583	200	c("PDE5A", "STK38L", "NOX4", "CRYM", "ICK", "BRSK1", "MYH10", "SNRK", "SCG5", "PIF1", "RAB26", "CBR3", "PDK3", "TNIK", "TSSK6", "HPGD", "TP53I3", "CBR4", "GAL3ST3", "HSPA4L", "LMTK2", "MAP4K4", "CAMK2G", "GNAI1", "NRBP2", "ATP7B", "MSH2", "BDH2", "DYRK2", "NNT", "SRPK3", "PEX1", "GEM", "MCM4", "NLRP1", "ZAP70", "TLK1", "ABCA2", "DAPK3", "RRAS", "RAB28", "MAP3K1", "CRYZL1", "CDC42BPB", "PEX6", "AC…
805	NUCLEOTIDE BINDING%GO%GO:0000166	0.000858067	0.00315832	0.477271	0.230675	1.77583	200	c("PDE5A", "STK38L", "NOX4", "CRYM", "ICK", "BRSK1", "MYH10", "SNRK", "SCG5", "PIF1", "RAB26", "CBR3", "PDK3", "TNIK", "TSSK6", "HPGD", "TP53I3", "CBR4", "GAL3ST3", "HSPA4L", "LMTK2", "MAP4K4", "CAMK2G", "GNAI1", "NRBP2", "ATP7B", "MSH2", "BDH2", "DYRK2", "NNT", "SRPK3", "PEX1", "GEM", "MCM4", "NLRP1", "ZAP70", "TLK1", "ABCA2", "DAPK3", "RRAS", "RAB28", "MAP3K1", "CRYZL1", "CDC42BPB", "PEX6", "AC…
806	SIGNALING EVENTS MEDIATED BY VEGFR1 AND VEGFR2%PATHWAY INTERACTION DATABASE NCI-NATURE CURATED DATA%SIGNALING EVENTS MEDIATED BY VEGFR1 AND VEGFR2	0.00085849	0.00315832	0.477271	0.471577	2.06299	21	c("FYN", "PIK3R1", "PTPN11", "GRB10", "SHB", "GAB1", "VTN", "FBXW11", "VCL", "ROCK1", "PRKCA", "AKT1", "CTNNB1", "ITGAV", "VEGFA", "PIK3CA", "AKAP1")
807	CELLULAR CALCIUM ION HOMEOSTASIS%GO%GO:0006874	0.000859501	0.00315832	0.477271	0.337565	1.9917	54	c("HTR2B", "PLCE1", "EDNRA", "DRD4", "CYSLTR1", "CDH23", "PKD2", "SLC30A1", "PDE6A", "EPHX2", "TNNI3", "P2RY1", "ATP7B", "CSRP3", "CCL5", "PDE6B", "FGF2", "RGN", "CAV3", "ITPR1", "ATP2C1", "F2R", "TRPC1", "STIM2", "IBTK", "VAPB", "BBC3", "RYR2")
808	TUBULIN BINDING%GO%GO:0015631	0.000860102	0.00315832	0.477271	0.322102	1.95947	60	c("SNCA", "SGIP1", "TPPP3", "BRSK1", "DIXDC1", "CLIP3", "FGF13", "AGBL5", "TPR", "RABGAP1", "STMN1", "BBS4", "BCL2L11", "CEP290", "KIF5B", "MACF1", "DST", "CDK5RAP2", "GABARAPL2", "CLASP1", "BRCA1", "MAPT", "KIF23", "ARHGEF2", "APC", "TUBGCP5", "TERF1", "LRRK2", "POLB")
809	ENDOCYTIC VESICLE%GO%GO:0030139	0.000888932	0.00326015	0.477271	0.321663	1.9568	60	c("GRIA3", "SGIP1", "SH3GL2", "DPP4", "RAB23", "APOA1", "TYRP1", "CAMK2B", "VAMP1", "DLG4", "GRIA1", "HLA-DRB5", "AMOT", "HLA-DRB1", "CAMK2G", "CAMK2A", "UBB", "LDLRAP1", "CD36", "MYO6", "CAMK2D", "NLGN3", "SRGAP2", "RABEP1", "AP2M1", "RAB9B", "ITGAV", "VAMP2", "TIRAP", "ABCA1", "UBC", "HLA-DPB1", "HLA-DRA", "CD74", "CACNG8", "RAB31", "DAB2IP", "TLR7", "RAB43", "NOS3", "HLA-DPA1", "ATP6V0E1")
810	EMBRYONIC ORGAN MORPHOGENESIS%GO%GO:0048562	0.00089332	0.0032722	0.477271	0.415749	2.12759	33	c("FRZB", "FOXS1", "FOXC2", "LRP5", "SOX9", "WNT9A", "FOXI2", "IRX5", "SMO", "CEP290", "FZD6", "ID2", "FGFR2", "FZD3", "DVL2", "DVL3")
811	BASEMENT MEMBRANE%GO%GO:0005604	0.000903965	0.00330711	0.477271	0.466488	2.07661	22	c("THBS4", "AGRN", "APLP1", "LEPREL1", "LAMA2", "COL8A2", "LAMA4", "THBS3", "EFEMP2", "DST", "ERBB2IP", "LAMA3", "SMC3", "LAMB2", "COL4A6")
812	NEGATIVE REGULATION OF PHOSPHORYLATION%GO%GO:0042326	0.000909263	0.00332239	0.477271	0.304355	1.98912	80	c("THY1", "SFRP1", "BMP4", "UCHL1", "RGS4", "APOE", "STK38L", "IGFBP3", "MYOCD", "LRP5", "CNKSR3", "INHBA", "FAM129A", "SOCS4", "DYNLL1", "NTF3", "CDKN2B", "DUSP6", "SFRP2", "FGFR1OP", "TP73", "DUSP16", "CAV3", "CDKN1B", "SIRT1", "DUSP8", "APC", "CDKN2C", "PARK2", "SMAD7", "ZNF675", "RGS3", "IGF1R", "DMD", "PPM1E", "HEXIM2", "IBTK", "AKT1", "SMAD6", "NF1", "TWIST1", "RGS14", "PPP2R1A", "MBIP", "S…
813	ENDOPEPTIDASE ACTIVITY%GO%GO:0004175	0.000912896	0.00333156	0.477271	0.350003	2.04387	52	c("FAP", "MME", "CTSK", "SFRP1", "UCHL1", "ACE2", "PLAT", "MMP28", "CTSO", "ACE", "MASP1", "PCSK5", "CAPN3", "GZMA", "CTSF", "OMA1", "HTRA3", "MMP23B", "USP11")
814	GENERATION OF A SIGNAL INVOLVED IN CELL-CELL SIGNALING%GO%GO:0003001	0.000921895	0.00335615	0.477271	0.395974	2.06551	35	c("SLC6A1", "LTBP4", "BRSK1", "SLC5A7", "VAMP1", "ALDH5A1", "INHBA", "EDN3", "SLC6A12", "CAMK2G", "TBX3", "ABAT", "CDK5", "SLC17A7", "NLGN1", "SLC6A13", "STX7", "GLS2", "GIPC1")
815	SIGNAL RELEASE%GO%GO:0023061	0.000921895	0.00335615	0.477271	0.395974	2.06551	35	c("SLC6A1", "LTBP4", "BRSK1", "SLC5A7", "VAMP1", "ALDH5A1", "INHBA", "EDN3", "SLC6A12", "CAMK2G", "TBX3", "ABAT", "CDK5", "SLC17A7", "NLGN1", "SLC6A13", "STX7", "GLS2", "GIPC1")
816	PEPTIDASE ACTIVITY, ACTING ON L-AMINO ACID PEPTIDES%GO%GO:0070011	0.000923296	0.00335713	0.477271	0.275128	1.90443	106	c("AEBP1", "FAP", "MME", "CTSK", "SFRP1", "HTRA1", "UCHL1", "CPE", "ACE2", "PLAT", "MMP28", "CTSO", "DPP4", "ACE", "USP46", "MASP1", "PCSK5", "CAPN3", "USP9Y", "TNIP1", "GZMA", "AGBL5", "ATXN3", "CTSF", "ADAMTS13", "OMA1", "HTRA3", "MMP23B", "USP11", "ADAM21", "F10", "METAP2", "NAALAD2", "USP13", "USP28", "AGBL3", "PAPPA2", "ERAP1", "ADAM2", "YOD1", "ATG4C", "UFSP2", "GZMH", "SENP6", "NUDT16", "T…
817	CELL CYCLE PHASE TRANSITION%GO%GO:0044770	0.000941855	0.00341482	0.477271	0.275817	1.90401	105	c("CCND1", "WEE1", "TPD52L1", "NES", "MCM2", "PLK2", "INHBA", "PLK3", "DYNLL1", "CEP57", "STAG2", "CDKN2B", "CEP290", "PLCB1", "MCM4", "DCTN1", "FGFR1OP", "PPP2R3B", "ID2", "ANAPC10", "TUBG2", "UBB", "TAF1", "SKP2", "ALMS1", "CDK5RAP2", "CLASP1", "CDKN1B", "CEP72", "DYNC1H1", "ODF2", "CEP70", "NPAT", "TUBGCP5", "CDKN2C", "TERF1", "PSMD10", "RAD21", "CETN2", "PCNA", "NUMA1", "PSMB10", "FBXL7", "KH…
818	MITOTIC CELL CYCLE PHASE TRANSITION%GO%GO:0044772	0.000941855	0.00341482	0.477271	0.275817	1.90401	105	c("CCND1", "WEE1", "TPD52L1", "NES", "MCM2", "PLK2", "INHBA", "PLK3", "DYNLL1", "CEP57", "STAG2", "CDKN2B", "CEP290", "PLCB1", "MCM4", "DCTN1", "FGFR1OP", "PPP2R3B", "ID2", "ANAPC10", "TUBG2", "UBB", "TAF1", "SKP2", "ALMS1", "CDK5RAP2", "CLASP1", "CDKN1B", "CEP72", "DYNC1H1", "ODF2", "CEP70", "NPAT", "TUBGCP5", "CDKN2C", "TERF1", "PSMD10", "RAD21", "CETN2", "PCNA", "NUMA1", "PSMB10", "FBXL7", "KH…
819	CYTOPLASMIC VESICLE PART%GO%GO:0044433	0.000942809	0.00341482	0.477271	0.270637	1.88806	110	c("GRIA3", "SNCA", "PROS1", "SGIP1", "LEFTY2", "TGFB2", "SH3GL2", "TGFB3", "RASSF9", "CA4", "COPZ2", "VEGFC", "TYRP1", "MYO5B", "CAMK2B", "RAB26", "VAMP1", "DLG4", "GRIA1", "HLA-DRB5", "IGF1", "HLA-DRB1", "CSPG5", "SPIRE1", "CAMK2G", "SEC31A", "TMEM163", "ACTN2", "CLU", "CAMK2A", "UBB", "SLC17A7", "LDLRAP1", "ITPR1", "CD36", "TRIM72", "TMEM67", "APP", "CAMK2D", "ZDHHC17", "ZP3", "CD9", "AFTPH", "…
820	SMALL CONJUGATING PROTEIN LIGASE ACTIVITY%GO%GO:0019787	0.000943765	0.00341482	0.477271	0.280538	1.92682	103	c("HERC5", "MYLIP", "HECW2", "UBE2H", "KLHL13", "HERC6", "FBXL14", "RNF103", "RNF217", "BTRC", "UBE2Q2", "TRIM33", "LMO7", "HECTD2", "RNF20", "FBXO4", "TRIM2", "RNF146", "WWP2", "FANCL", "ANAPC10", "FBXW11", "FBXO21", "UBE2D1", "PIAS2", "BRCA1", "NSMCE1", "UBE2W", "TTC3", "DDB2", "FBXO9", "PARK2", "NEDD4L", "RNF25", "PIAS1", "BCOR", "BIRC6", "KLHL20", "UBE2T", "DZIP3", "FBXO3", "BRAP", "FBXL7", "…
821	PROTEOLYSIS%GO%GO:0006508	0.00095088	0.00343637	0.477271	0.238255	1.78012	167	c("MME", "PROS1", "HTRA1", "MMP28", "HERC5", "ENC1", "HECW2", "UBE2H", "CAPN3", "FBXL2", "HERC6", "FBXL14", "RNF103", "RNF217", "GZMA", "BTRC", "ATXN3", "ADAMTS13", "DDIT3", "HECTD2", "FBXO8", "RNF20", "OMA1", "FBXO4", "HTRA3", "MMP23B", "FBXO31", "TBL1XR1", "RNF146", "CRBN", "WWP2", "ANAPC10", "F10", "FBXW11", "UBB", "SKP2", "MAD2L1", "FBXO21", "UBE2D1", "SIRT1", "NAALAD2", "NFE2L2", "UBE2W", "F…
822	GPCR LIGAND BINDING%REACTOME%REACT_21340.3	0.000973244	0.00351291	0.477271	0.258758	1.86096	134	c("HTR2B", "FZD2", "PENK", "F2RL2", "EDNRA", "PTGFR", "GRM1", "CX3CR1", "DRD4", "GNB3", "LPAR4", "APLNR", "CYSLTR1", "CXCR4", "FZD1", "GNG11", "P2RY14", "WNT2B", "FZD7", "WNT9A", "CXCR7", "RAMP2", "EDN3", "GNRH1", "RLN2", "CCR4", "S1PR5", "SMO", "PTHLH", "P2RY1", "PTGER4", "FZD6", "GNG2", "HRH2", "CCL5", "ADORA2B", "LHCGR", "PRLH", "FZD3", "CCBP2", "PTGER3", "GRM8", "HTR6", "APLN", "S1PR2", "PTCH…
823	CALCIUM ION HOMEOSTASIS%GO%GO:0055074	0.000978499	0.00352457	0.45506	0.329294	1.97292	57	c("HTR2B", "PLCE1", "SNCA", "EDNRA", "DRD4", "CYSLTR1", "CDH23", "PKD2", "SLC30A1", "PDE6A", "EPHX2", "TNNI3", "P2RY1", "ATP7B", "CSRP3", "CCL5", "PDE6B", "FGF2", "RGN", "CAV3", "ITPR1", "ATP2C1", "F2R", "TRPC1", "STIM2", "IBTK", "VAPB", "BBC3", "RYR2", "ATP6V1B1", "SLC8A1", "CASQ2", "PLN", "FIS1", "CCDC90A")
824	OSTEOBLAST DIFFERENTIATION%GO%GO:0001649	0.000978848	0.00352457	0.45506	0.464891	2.06951	22	c("SFRP1", "BMP4", "RUNX2", "LEF1", "GLI1", "SOX8", "FZD1", "LRP5", "SMO", "FIGNL1", "MEF2C")
825	SULFUR COMPOUND CATABOLIC PROCESS%GO%GO:0044273	0.000983806	0.00353813	0.45506	0.433933	2.01945	25	c("FMOD", "OGN", "LUM", "OMD", "PRELP", "CDO1", "CSAD", "CSPG5", "HEXB", "IDS", "HEXA", "GPC1", "IDUA")
826	RESPONSE TO HORMONE STIMULUS%GO%GO:0009725	0.000990785	0.00355539	0.45506	0.255278	1.86489	145	c("SFRP4", "SOCS2", "SFRP1", "JAK2", "BMP4", "ESR1", "CRHBP", "TGFB2", "GNB3", "HDAC9", "FOXS1", "TGFB3", "FGF1", "FGF18", "ATP6V1G2", "PIK3R1", "FOXC2", "PTPN11", "GNG11", "LMO2", "SORT1", "GRB10", "GAB1", "PDE3B", "GHR", "GNAI1", "BBS4", "THRA", "GNG2", "PRKAA2", "ADCY2", "TSC1", "FGF2", "HDAC5", "LHCGR", "ABCA2", "FGFR2", "SLC25A36", "MEF2C", "FGFR3", "CISH", "SORBS1", "FGF9", "BRCA1", "SIRT1"…
827	RNA POLYMERASE I, RNA POLYMERASE III, AND MITOCHONDRIAL TRANSCRIPTION%REACTOME%REACT_21352.3	0.000991004	0.00355539	0.45506	0.348427	2.03467	52	c("HIST1H2AC", "HIST1H2BC", "HIST1H2BG", "POLR3B", "UBTF", "HIST1H2AE", "HIST1H4H", "SNAPC5", "HIST1H4E", "GTF3C1", "RRN3", "EHMT2", "NFIB", "POLR3GL", "HIST1H2BD", "ERCC6", "HIST1H3D", "ERCC2", "GTF2H1", "NFIX", "POLR3F", "HIST2H2BE", "NFIA", "TBP", "GTF2H3", "TTF1", "MNAT1", "POLR2K", "HIST1H2BN", "TFAM", "CDK7", "CBX3", "BRF2", "SNAPC3", "HIST1H2BL", "POLR2L")
828	POSITIVE REGULATION OF CELL CYCLE%GO%GO:0045787	0.00100244	0.00359066	0.45506	0.386304	2.03616	36	c("CCND1", "TGFB2", "CCND2", "SOX15", "PKD2", "LRP5", "NUSAP1", "IGF1", "EDN3", "PKD1", "FGFR2", "TBX3", "PHIP", "APP", "PROX1", "TERF1", "PSMD10", "IGF2", "PKN2", "PRKCA", "AKT1")
829	MACROMOLECULAR COMPLEX ASSEMBLY%GO%GO:0065003	0.00100325	0.00359066	0.45506	0.219542	1.73694	244	c("FMOD", "CENPA", "JAK2", "DPYSL3", "APOE", "TCF4", "HIST1H2AC", "CHRNA3", "MYH11", "COLEC12", "APOA1", "KIF13A", "CAPN3", "RYR3", "DLG4", "ALDH5A1", "APOM", "SOX9", "SHANK1", "FGF13", "GSN", "ATPIF1", "MDM4", "HMGB2", "BICD1", "HLA-DRB1", "HIST1H2BC", "HIST1H2BG", "CBR4", "BBS10", "PSIP1", "TPR", "PILRB", "FCHO2", "LRRC6", "LLGL1", "SH3BGR", "CCL5", "H1FX", "HIST1H2AE", "ACTN2", "HIST1H4H", "AR…
830	GOLGI MEMBRANE%GO%GO:0000139	0.00101852	0.00364089	0.45506	0.28215	1.93435	102	c("ST8SIA2", "PROS1", "PDGFD", "CHST6", "SH3GL2", "RASSF9", "CHSY3", "ST8SIA4", "NMNAT2", "B3GNT2", "COPZ2", "EXT1", "RAB26", "DOPEY1", "MGAT3", "SCAMP5", "HLA-DRB5", "HLA-DRB1", "SLC35A1", "ST3GAL3", "CSPG5", "CHST14", "ATP7B", "GALNT11", "ABCB4", "GOLGA3", "B3GNT8", "FUT8", "HS2ST1", "ST3GAL6", "PDGFC", "WIPI1", "ST6GALNAC4", "GABARAPL2", "LDLRAP1", "MGAT4B", "BSG", "ATP2C1", "NCAM1", "ZDHHC17"…
831	POSITIVE REGULATION OF SEQUENCE-SPECIFIC DNA BINDING TRANSCRIPTION FACTOR ACTIVITY%GO%GO:0051091	0.0010312	0.00368181	0.45506	0.335451	2.05713	63	c("FZD2", "KIT", "ESR1", "BEX1", "CAPN3", "MYOCD", "EDA2R", "FZD1", "SMO", "PRKD1", "HDAC5", "HDAC4", "CLU", "AR", "DVL2", "CAMK2A", "UBB", "ERC1", "PPARGC1A", "DDR2", "EP300", "ARHGEF2", "STK36", "RNF25", "SP100", "EPHA5", "JMY", "TERF2IP", "TRAF6", "MAP3K7", "NEUROG2", "AKT1", "TIRAP", "RHEBL1", "DDX58", "UBC", "VEGFA")
832	COFACTOR BIOSYNTHETIC PROCESS%GO%GO:0051188	0.00103741	0.0036995	0.45506	0.39976	2.06239	34	c("ELOVL4", "NMNAT2", "ATPIF1", "ACSS1", "BDH2", "NMNAT3", "NFE2L1", "MAT2B", "UROS", "FECH", "PANK1", "LIAS", "SLC25A16", "PPOX", "PPCS", "COX15", "MLYCD", "COQ3", "MOCS2", "SLC25A38", "NMNAT1", "PDHB", "ACSL6", "GPHN", "UROD", "DLAT", "PPCDC")
833	FOREBRAIN DEVELOPMENT%GO%GO:0030900	0.00104697	0.00372914	0.45506	0.366966	2.01244	42	c("BMP4", "LEF1", "NTRK2", "DIXDC1", "WDR62", "WNT2B", "FGF13", "EPHB3", "SMO", "ROBO1", "BBS4", "STIL", "PLCB1", "FGFR2", "PROX1", "HES5", "NFIB", "BBS2", "EPHA5", "LRRK2", "RAB3GAP1", "SRGAP2", "FOXP2", "NDE1", "ATP7A", "NF1", "PCM1", "SLIT2", "DAB2IP")
834	NUCLEOPLASM PART%GO%GO:0044451	0.00105848	0.00376559	0.45506	0.213662	1.69869	250	c("STK38L", "TCF4", "LEF1", "HDAC9", "FOXS1", "IVNS1ABP", "PRMT2", "BEX1", "FOXC2", "TCEA2", "LMO2", "MGA", "ING4", "FOXD2", "FOXI2", "TCF7L2", "SUB1", "MED30", "TBL1XR1", "SUPT3H", "SMARCC2", "PLCB1", "ZNF224", "ERCC5", "HDAC5", "HDAC4", "EP400", "TP73", "FANCL", "JAZF1", "MEF2C", "TAF1", "PIAS2", "PPARGC1A", "ZMYM2", "SIRT1", "SUPT5H", "MLL", "SMARCE1", "SAP18", "PPIH", "EZH1", "GTF3C1", "MED12…
835	OXIDOREDUCTASE ACTIVITY%GO%GO:0016491	0.0010606	0.00376861	0.45506	0.227942	1.74519	190	c("DIO2", "SNCA", "ALDH1A2", "NOX4", "ACADL", "FMO3", "HSD17B14", "CYBRD1", "CYP2J2", "SOD3", "LEPREL1", "CDO1", "ALDH1A1", "FMO4", "PXDNL", "CBR3", "LTC4S", "CYP11A1", "ALDH5A1", "MSRB3", "HPGD", "TP53I3", "ALDH4A1", "ENOX2", "CBR4", "CYP46A1", "FMO2", "DECR2", "CYP26B1", "GSTO2", "HGD", "BDH2", "IVD", "MSRB2", "NNT", "MTHFD2L", "HSD17B8", "SRD5A1", "ADH5", "BCKDHA", "PTGR2", "MGST3", "D2HGDH", …
836	ORGANOPHOSPHATE BIOSYNTHETIC PROCESS%GO%GO:0090407	0.00106916	0.00379449	0.45506	0.26077	1.84612	120	c("HTR2B", "SLC44A5", "NPPA", "APOA1", "INPP4B", "NMNAT2", "PIK3R1", "NPPB", "SLC44A1", "AGPAT4", "PIK3C2B", "AK5", "GFPT1", "RAMP2", "PRTFDC1", "MBOAT2", "DCK", "PLA2G4C", "AGPAT9", "PIP4K2B", "ATM", "MTMR4", "ADCY2", "FGF2", "LCAT", "NMNAT3", "PGAP1", "PIGK", "MPPE1", "PIGM", "SLC27A1", "PIGZ", "PIGP", "DPM3", "PMM1", "DPM1", "PIK3R2", "SYNJ2", "CDS2", "MTMR14", "SCP2", "PIK3C3", "CHKB", "PIK3C…
837	CARDIAC MUSCLE TISSUE DEVELOPMENT%GO%GO:0048738	0.00107489	0.00381029	0.45506	0.390759	2.0383	35	c("TGFB2", "FOXS1", "MYH11", "ANKRD1", "FOXC2", "MYOCD", "TNNI3", "CSRP3", "CBY1", "FGFR2", "MEF2C", "MESP1", "PROX1", "SMAD7", "FOXP1", "PKP2", "MEF2A", "GATA4", "RYR2", "OBSL1", "SLC8A1", "VEGFA", "ZFPM2", "NEBL", "TNNC1", "WT1")
838	ACTIN FILAMENT BINDING%GO%GO:0051015	0.00108204	0.00382647	0.45506	0.446588	2.04899	24	c("ANTXR1", "FSCN1", "MYH10", "SVIL", "LIMA1", "MYO10", "MARCKS", "NEXN", "SHROOM2", "MACF1", "SHROOM1", "MYO16", "MYO6")
839	REGULATION OF EMBRYONIC DEVELOPMENT%GO%GO:0045995	0.00108204	0.00382647	0.45506	0.45764	2.0709	23	c("SULF1", "APOA1", "MAP2K5", "WNT2B", "FZD7", "DUSP6", "PLCB1", "SFRP2", "NPHP3", "DVL2", "DVL3", "PPP2R3A", "MESP1", "NKD1")
840	CYCLIN D ASSOCIATED EVENTS IN G1%REACTOME%REACT_821.2	0.00109247	0.00384961	0.45506	0.488114	2.08573	20	c("CCND1", "CCND2", "CDKN2B", "PPP2R1B", "PPP2R3B", "UBB", "SKP2", "CDKN1B", "TFDP2", "CDKN2C", "RBL2", "UBC", "MNAT1", "RBL1", "PPP2R1A", "CDK7", "PPP2CA", "E2F1")
841	G1 PHASE%REACTOME%REACT_1590.1	0.00109247	0.00384961	0.45506	0.488114	2.08573	20	c("CCND1", "CCND2", "CDKN2B", "PPP2R1B", "PPP2R3B", "UBB", "SKP2", "CDKN1B", "TFDP2", "CDKN2C", "RBL2", "UBC", "MNAT1", "RBL1", "PPP2R1A", "CDK7", "PPP2CA", "E2F1")
842	GLYCOLIPID BIOSYNTHETIC PROCESS%GO%GO:0009247	0.00109247	0.00384961	0.45506	0.488122	2.08577	20	c("ST8SIA2", "ST8SIA5", "ST8SIA4", "PGAP1", "PIGK", "MPPE1", "PIGM", "PIGZ", "PIGP", "DPM3", "ST6GALNAC6", "DPM1", "PIGV", "B3GNT5")
843	SLC-MEDIATED TRANSMEMBRANE TRANSPORT%REACTOME%REACT_19118.1	0.00109772	0.00386351	0.45506	0.280018	1.91127	99	c("SLC26A4", "SLC30A2", "SLC1A7", "SLC6A1", "SLC44A5", "HEPH", "SLC27A6", "SLC47A1", "SLC40A1", "SLC9A5", "SLC30A1", "SLC5A7", "SLC16A7", "SLC44A1", "SLC4A8", "SLC2A10", "SLC35A1", "SLC22A18", "TPR", "SLC6A12", "SLC24A3", "SLC13A4", "SLC2A12", "SLC24A1", "NUP188", "SLC2A11", "SLC27A1", "SLC29A3", "SLC17A7", "NUP37", "SLC9A4", "GCK", "SLC14A1", "NUPL2", "SLC6A13", "SLC6A19", "SLC4A4", "SLC6A2", "S…
844	BIOCARTA_PAR1_PATHWAY%MSIGDB_C2%BIOCARTA_PAR1_PATHWAY	0.00111776	0.00392938	0.45506	0.465475	2.0363	21	c("PIK3R1", "ARHGEF3", "ARHGEF12", "ARHGEF4", "GNAI1", "ARHGEF9", "PLCB1", "ARHGEF6", "ARHGEF2", "F2R", "ROCK1", "PIK3CG", "PRKCA", "MAP3K7", "ARHGEF11", "PIK3CA")
845	NEURAL CREST CELL DIFFERENTIATION%GO%GO:0014033	0.00112204	0.00393975	0.45506	0.525959	2.07999	16	c("HTR2B", "LEF1", "FOXS1", "SOX8", "FOXC2", "FOXD2", "SMO", "JAG1", "MEF2C")
846	ENDOSOMAL TRANSPORT%GO%GO:0016197	0.00112758	0.00395451	0.45506	0.334363	2.05046	63	c("RASSF9", "KIF13A", "RAB11FIP3", "DOPEY1", "SORT1", "DENND2A", "LMTK2", "CHMP5", "TRAK1", "STAM", "SNX16", "SNX1", "STX16", "UBB", "ALMS1", "WIPI1", "FAM109A", "MON2", "HOOK2", "RAB12", "VPS37D", "VPS13A", "EHD3", "VPS35", "SQSTM1", "EEA1", "PIK3C3", "RAB9B", "BET1L", "DPY30", "MTM1", "VPS36", "ABCA1", "UBC", "LYST", "VPS4B", "TSG101", "GCC2", "CHMP4C", "CHMP2A", "ARL1")
847	MULTICELLULAR ORGANISM REPRODUCTION%GO%GO:0032504	0.00113757	0.00398484	0.45506	0.285199	1.92906	94	c("SFRP4", "KIT", "SFRP1", "TGFB2", "TGFB3", "SOX8", "REC8", "OSGIN2", "USP9Y", "PIWIL4", "SOX9", "TSSK6", "HPGD", "ADC", "MAEL", "DPY19L2", "INHBA", "DZIP1", "CYP26B1", "SMO", "DYNLL1", "CEP57", "BBS4", "TCFL5", "MYCBPAP", "PNMA1", "RPL39L", "TDRD6", "GDF9", "BCL2L2", "SPAG4", "APLN", "NPHP1", "KIAA0430", "ZP3", "CCNI", "BBS2", "CD9", "NPM2", "ADAM2", "HERC4", "CTNNB1", "NANOS3", "DMC1", "PRMT7"…
848	ORGANONITROGEN COMPOUND CATABOLIC PROCESS%GO%GO:1901565	0.00115282	0.00403351	0.45506	0.225754	1.73703	198	c("FMOD", "PDE5A", "OGN", "ENPP2", "LUM", "OMD", "AGRN", "GNB3", "DDAH1", "ASPA", "ACE", "RAB23", "PRELP", "GPC6", "APOBEC3G", "CDO1", "CSAD", "NT5C2", "APOBEC3F", "GNG11", "ALDH5A1", "ALDH4A1", "PRTFDC1", "PDE3B", "SDC2", "ADAMTS13", "RALBP1", "CSPG5", "HEXB", "HGD", "IDS", "MSH2", "RND3", "IVD", "KIF20B", "EIF2S3", "FGF2", "RAB33A", "CECR1", "PMS1", "HEXA", "MACF1", "FUCA1", "ABCA2", "ADAL", "B…
849	G-PROTEIN COUPLED RECEPTOR SIGNALING PATHWAY%GO%GO:0007186	0.00115513	0.00403684	0.45506	0.244354	1.81529	162	c("HTR2B", "FZD2", "PLCE1", "ENPP2", "EDNRA", "CPE", "APOE", "AGRN", "PTGFR", "GRM1", "CX3CR1", "DRD4", "GABRE", "GNB3", "APLP1", "GLRB", "LPAR4", "APLNR", "APOA1", "CXCR4", "LPHN3", "NXPH4", "FZD1", "P2RY14", "DLG4", "XPR1", "HPGD", "FZD7", "GPR124", "SORT1", "ARHGEF12", "GPR22", "PTHLH", "P2RY1", "GNAI1", "GP1BA", "SORCS2", "PTGER4", "FZD6", "GNG2", "HRH2", "PLCB1", "ADCY2", "ADORA2B")
850	MORPHOGENESIS OF EMBRYONIC EPITHELIUM%GO%GO:0016331	0.00116296	0.00405943	0.45506	0.487425	2.0127	18	c("SOX4", "SOX8", "PRICKLE1", "SOX9", "BBS4", "STIL", "FZD6", "FGFR2", "FZD3", "DVL2", "COBL", "PLXNB2", "CTNNB1", "GATA3")
851	CELL-CELL JUNCTION%GO%GO:0005911	0.00116469	0.00406067	0.45506	0.297545	1.9424	79	c("KCNA5", "DSC1", "PAK1", "SCN4B", "PKD2", "FGF13", "JAM3", "BAIAP2L2", "AMOT", "TJP1", "CADM1", "CLDN9", "PTPRM", "PLEKHA7", "ABCB4", "CLDN11", "SHROOM2", "CTNNA3", "SORBS1", "CDC42BPB", "TJP2", "PDZD2", "NPHP1", "CLDN1", "APC", "NPHS2", "SMAD7", "VCL", "PKP2", "MAGI2", "INADL", "GJA1", "KRIT1", "PKN2", "PNN", "CTNNB1", "VAPA", "OBSL1", "SLC8A1", "PGM5", "FAT2", "DDX58", "SDCCAG8", "DSC2", "PKP…
852	Hypertrophic cardiomyopathy (HCM)%KEGG%hsa05410	0.00117465	0.0040906	0.45506	0.38098	2.02103	38	c("TGFB2", "TGFB3", "CACNA2D2", "ACE", "TPM3", "ITGA8", "LAMA2", "CACNA2D1", "SGCG", "ITGA10", "TNNI3", "IGF1", "PRKAA2", "ITGA9", "PRKAB2", "CACNA1D", "SGCA", "DMD", "ITGB7", "ITGB4", "RYR2", "ITGAV", "SLC8A1", "CACNG8", "TNNC1", "SGCB", "CACNB4", "DES", "TNF", "CACNA1C")
853	NEGATIVE REGULATION OF CELL CYCLE PHASE TRANSITION%GO%GO:1901988	0.00118718	0.00412456	0.45506	0.380957	2.01911	37	c("SOX4", "PRMT2", "PKD2", "CRADD", "TPR", "DACT1", "KANK2", "ATM", "BUB1", "FHL1", "ANAPC10", "UBB", "MAD2L1", "UBE2D1", "CDKN1B", "APC", "TERF1", "PSMD10", "PSMB10", "BRD7")
854	NEGATIVE REGULATION OF MITOTIC CELL CYCLE PHASE TRANSITION%GO%GO:1901991	0.00118718	0.00412456	0.45506	0.380957	2.01911	37	c("SOX4", "PRMT2", "PKD2", "CRADD", "TPR", "DACT1", "KANK2", "ATM", "BUB1", "FHL1", "ANAPC10", "UBB", "MAD2L1", "UBE2D1", "CDKN1B", "APC", "TERF1", "PSMD10", "PSMB10", "BRD7")
855	ADHERENS JUNCTION%GO%GO:0005912	0.00120651	0.0041868	0.45506	0.363305	1.99237	42	c("ENAH", "EVL", "LIMA1", "EPHX2", "AFAP1", "PDLIM7", "PTPRM", "PLEKHA7", "SHROOM2", "SYNM", "ACTN2", "CTNNA3", "PNMA1", "FGFR3", "SORBS1", "BRCA1", "LPXN", "APC", "SYNE2", "SMAD7", "VCL", "PKP2")
856	REGULATION OF AXONOGENESIS%GO%GO:0050770	0.00120814	0.00418755	0.45506	0.419343	2.01698	27	c("THY1", "APOE", "CHN1", "NTRK2", "DIXDC1", "SIPA1L1", "LRRC4C", "FGF13", "EPHB3", "ROBO1", "ISLR2", "RTN4R", "MAPT", "LINGO1")
857	UBIQUITIN-PROTEIN LIGASE ACTIVITY%GO%GO:0004842	0.00121526	0.00420731	0.45506	0.281343	1.90979	97	c("HERC5", "MYLIP", "HECW2", "UBE2H", "KLHL13", "HERC6", "FBXL14", "RNF103", "RNF217", "BTRC", "UBE2Q2", "TRIM33", "LMO7", "HECTD2", "RNF20", "FBXO4", "TRIM2", "RNF146", "WWP2", "FANCL", "ANAPC10", "FBXW11", "FBXO21", "UBE2D1", "BRCA1", "NSMCE1", "UBE2W", "TTC3", "DDB2", "FBXO9", "PARK2", "NEDD4L", "RNF25", "BCOR", "BIRC6", "KLHL20", "UBE2T", "DZIP3", "FBXO3", "BRAP", "FBXL7", "ARIH2", "TRAF6", "…
858	PROTEOLYSIS INVOLVED IN CELLULAR PROTEIN CATABOLIC PROCESS%GO%GO:0051603	0.001239	0.00428452	0.45506	0.261975	1.84856	118	c("HERC5", "ENC1", "HECW2", "UBE2H", "HERC6", "FBXL14", "RNF103", "RNF217", "GZMA", "BTRC", "ATXN3", "DDIT3", "HECTD2", "FBXO8", "RNF20", "OMA1", "FBXO4", "FBXO31", "TBL1XR1", "RNF146", "CRBN", "WWP2", "ANAPC10", "FBXW11", "UBB", "SKP2", "MAD2L1", "FBXO21", "UBE2D1", "SIRT1", "NFE2L2", "UBE2W", "FOXRED2", "TTC3", "TMEM67", "ATE1", "FBXO9", "PARK2", "NEDD4L", "PSMD10", "YME1L1", "ARRB1", "PSMB10",…
859	MESENCHYMAL CELL DIFFERENTIATION%GO%GO:0048762	0.00125016	0.00431807	0.45506	0.417828	2.00969	27	c("HTR2B", "LEF1", "TGFB2", "FOXS1", "SOX8", "FOXC2", "SOX9", "FOXD2", "SMO", "JAG1", "FGFR2", "MEF2C")
860	SPECIFICATION OF SYMMETRY%GO%GO:0009799	0.00125344	0.00432438	0.45506	0.453387	2.05165	23	c("BMP4", "PKD2", "PKD1L1", "DAND5", "SMO", "LRRC6", "BBS4", "STIL", "NPHP3", "MEF2C", "MESP1", "HAND2", "NBL1", "GATA4", "CTNNB1", "SETDB2")
861	SIGNALING BY NOTCH%REACTOME%REACT_299.5	0.00127524	0.00439445	0.45506	0.359723	2.01882	45	c("CCND1", "HDAC9", "LFNG", "ST3GAL3", "MAMLD1", "TBL1XR1", "JAG1", "HDAC5", "HDAC4", "ST3GAL6", "UBB", "EP300", "TNRC6A", "ATP2A3", "HES5", "MAML2", "TFDP2", "HDAC3", "ARRB1", "DTX4", "RBX1", "TLE4", "CDK8", "MAML3", "TLE1", "MIB1", "UBC", "TNRC6B", "CCNC", "HDAC2", "RAB6A", "ADAM10", "E2F1")
862	REGULATION OF MULTI-ORGANISM PROCESS%GO%GO:0043900	0.00131214	0.00451639	0.45506	0.288212	1.89408	82	c("MDFIC", "LEF1", "HERC5", "IFIT1", "RNASEL", "APOBEC3G", "RSAD2", "FYN", "PACS1", "APOBEC3F", "DDX60", "TNIP1", "CD247", "CCL5", "GTF2F2", "APOBEC3C", "SUPT16H", "SUPT5H", "PPIH", "EP300", "RSF1", "P2RX7", "POLR2G", "PROX1", "SIN3A", "ELMOD2", "SP100", "REST", "ERCC2", "GTF2H1", "PRKCA", "AP2M1", "POLR2C", "VAPB", "POLR2A", "ITGAV", "GTF2H3", "TIRAP", "POLR2I", "DDX58", "PPID", "MNAT1", "PCBP2"…
863	REGULATION OF ACTIN FILAMENT-BASED PROCESS%GO%GO:0032970	0.00132573	0.0045546	0.45506	0.31318	1.96007	67	c("KCNA5", "PLEKHH2", "EPHA3", "SFRP1", "SCN2B", "PAK1", "SCN3B", "SCN4B", "KANK1", "LIMA1", "GSN", "AMOT", "RICTOR", "NTF3", "NEB", "PTGER4", "TSC1", "DAPK3", "CAV3", "CDK5", "ALMS1", "SYNPO", "PROX1", "PARK2", "ROCK1", "EPHA5", "JMY", "PKP2", "PDXP", "PPM1E", "GJA1", "FHOD1", "TWF2")
864	Lysosome%KEGG%hsa04142	0.00132631	0.0045546	0.45506	0.380467	2.0054	36	c("CTSK", "AP3M2", "CTSO", "ASAH1", "SORT1", "CTSF", "HEXB", "IDS", "ARSG", "HEXA", "FUCA1", "ABCA2", "CLTCL1", "MANBA", "PLA2G15", "IDUA", "DNASE2", "SUMF1", "AGA", "AP4B1", "NAGPA", "ARSB", "GNPTAB", "MFSD8", "CLN5", "AP4S1", "HYAL1", "ATP6V1H", "AP3S2", "GALC")
865	REGULATION OF PEPTIDE SECRETION%GO%GO:0002791	0.00133886	0.00458706	0.45506	0.358599	2.00451	44	c("KCNA5", "SOX4", "SFRP1", "CRHBP", "CACNA2D2", "KCNS3", "ABCC8", "LRP5", "MARCKS", "MYRIP", "HLA-DRB1", "TCF7L2", "ITPR1", "SIRT4", "GCK", "CACNA1D", "EPHA5", "GPLD1", "REST", "SLC25A5", "RAP1A", "PRKCA", "GLUD1", "PRKAR1B", "VAMP2")
866	REGULATION OF PEPTIDE TRANSPORT%GO%GO:0090087	0.00133886	0.00458706	0.45506	0.358599	2.00451	44	c("KCNA5", "SOX4", "SFRP1", "CRHBP", "CACNA2D2", "KCNS3", "ABCC8", "LRP5", "MARCKS", "MYRIP", "HLA-DRB1", "TCF7L2", "ITPR1", "SIRT4", "GCK", "CACNA1D", "EPHA5", "GPLD1", "REST", "SLC25A5", "RAP1A", "PRKCA", "GLUD1", "PRKAR1B", "VAMP2")
867	RNA PROCESSING%GO%GO:0006396	0.0013413	0.00459011	0.45506	0.238396	1.77317	165	c("IVNS1ABP", "RBMS2", "SYF2", "BICD1", "PSIP1", "PPIL3", "PPIG", "ZCRB1", "EXOSC7", "GTF2F2", "DDX17", "SRRM1", "SYMPK", "PPARGC1A", "RBPMS", "SUPT5H", "SNRPN", "SNURF", "PPIH", "INTS2", "DDX54", "RBM5", "PAPOLG", "PAPD4", "RP9", "POLR2G", "APP", "CRNKL1", "SLU7", "GEMIN8", "RNMT", "CNOT3", "SKIV2L2", "SNUPN", "RBM39", "PPWD1", "UPF3B", "ISY1", "RNPC3", "CSTF3", "PRPF31", "ATXN1", "PAN3", "KHDRB…
868	EPIDERMIS DEVELOPMENT%GO%GO:0008544	0.00134997	0.00461448	0.45506	0.335209	1.93149	50	c("TGFB2", "GLI1", "COL1A2", "COL7A1", "EDA2R", "CRABP2", "DACT2", "SOX9", "FOXI2", "INHBA", "COL3A1", "PTHLH", "PKD1", "JAG1", "FGFR2", "ALDH3A2", "BTD", "STS", "KRT17", "TXNIP", "ATP2C1", "LAMA3", "SPRR1B", "ERCC2", "APCDD1", "CTNNB1", "COL1A1", "ATP7A", "DCT")
869	PPARA ACTIVATES GENE EXPRESSION%REACTOME%REACT_116145.1	0.00135662	0.00463187	0.45506	0.333555	1.97961	56	c("APOA1", "TIAM2", "ANKRD1", "RGL1", "RORA", "CPT2", "MED30", "TBL1XR1", "ABCB4", "SLC27A1", "PPARGC1A", "CD36", "EP300", "MED12", "NCOA2", "NFYC", "ACADM", "PPARGC1B", "HDAC3", "CLOCK", "CHD9", "MED6", "CDK8", "MED11", "FDFT1", "ABCA1", "MED13", "SMARCD3", "MED21", "CCNC", "NFYA", "MED4", "PEX11A", "SREBF2", "PPARA", "NFYB", "CTGF", "MED23", "MED15", "NCOR1", "YAP1", "ACSL1", "FHL2", "MED24", "…
870	ErbB signaling pathway%KEGG%hsa04012	0.00140092	0.00477761	0.45506	0.405237	2.06489	32	c("PAK1", "HBEGF", "PIK3R1", "CAMK2B", "GAB1", "CAMK2G", "NRG2", "SHC4", "CAMK2A", "CDKN1B", "SOS2", "MAPK10", "PIK3R2", "CAMK2D", "STAT5B", "PIK3CG", "PRKCA", "AKT1", "NRG3", "PAK6", "RPS6KB1", "PIK3CA")
871	FATTY ACID METABOLIC PROCESS%GO%GO:0006631	0.00140493	0.00478581	0.45506	0.30619	1.92319	68	c("SLC27A6", "ACADL", "ELOVL4", "CYP2J2", "LTC4S", "ALDH5A1", "HPGD", "CPT2", "DECR2", "ACOT4", "GHR", "PLA2G4C", "BDH2", "PTGR2", "PLA2G15", "ACOX1", "PPARGC1A", "ACOT1", "ACOX2", "ACAD11", "LPL", "LIAS", "ACADM", "PCCB", "STAT5B", "SCP2", "PHYH", "AASDH", "MLYCD", "MCEE", "MGST2", "ACSF3", "HPGDS", "CROT", "SLC27A5", "ACOT11", "HACL1", "CD74", "ACOT8", "AMACR", "ACSL6", "MUT", "CYP4V2", "ECHS1"…
872	DENDRITIC SPINE%GO%GO:0043197	0.00140847	0.00478688	0.45506	0.45077	2.12879	26	c("CHRNA3", "SIPA1L1", "DLG4", "SHANK1", "FRMPD4", "GRIA1", "P2RY1", "ACTN2", "CDK5", "NLGN1", "SYNPO", "APP", "GIPC1", "MAGI2", "SRGAP2", "PDLIM5", "RGS14", "CACNG8", "DNM3", "CDK5R1", "CNIH2", "SRCIN1", "CACNA1C", "MTMR2")
873	NEURON SPINE%GO%GO:0044309	0.00140847	0.00478688	0.45506	0.45077	2.12879	26	c("CHRNA3", "SIPA1L1", "DLG4", "SHANK1", "FRMPD4", "GRIA1", "P2RY1", "ACTN2", "CDK5", "NLGN1", "SYNPO", "APP", "GIPC1", "MAGI2", "SRGAP2", "PDLIM5", "RGS14", "CACNG8", "DNM3", "CDK5R1", "CNIH2", "SRCIN1", "CACNA1C", "MTMR2")
874	CHANNEL ACTIVITY%GO%GO:0015267	0.00142965	0.00484774	0.45506	0.274897	1.88808	103	c("KCNA5", "GRIA3", "HTR2B", "SCN2B", "KCNT2", "KCNE1", "KCNMA1", "CHRNA3", "GLRB", "KCNS3", "SCN3B", "SCN4B", "BCL2", "KCNA4", "PKD2", "KCNC4", "KCNK6", "RYR3", "PKD1L1", "KCNMB4", "CACNA2D1", "TPCN1", "KCNMB2", "GRIA1", "TRPM4", "PKD1", "GRIK4", "SHROOM2", "KCNK17", "KCNS1", "ITPR1", "SCN3A", "LOXHD1", "CACNA1D", "HCN2", "P2RX7", "ZP3", "GAS6", "ANO1", "TRPC1", "REST", "STIM2", "GJA1", "PRF1", …
875	PASSIVE TRANSMEMBRANE TRANSPORTER ACTIVITY%GO%GO:0022803	0.00142965	0.00484774	0.45506	0.274897	1.88808	103	c("KCNA5", "GRIA3", "HTR2B", "SCN2B", "KCNT2", "KCNE1", "KCNMA1", "CHRNA3", "GLRB", "KCNS3", "SCN3B", "SCN4B", "BCL2", "KCNA4", "PKD2", "KCNC4", "KCNK6", "RYR3", "PKD1L1", "KCNMB4", "CACNA2D1", "TPCN1", "KCNMB2", "GRIA1", "TRPM4", "PKD1", "GRIK4", "SHROOM2", "KCNK17", "KCNS1", "ITPR1", "SCN3A", "LOXHD1", "CACNA1D", "HCN2", "P2RX7", "ZP3", "GAS6", "ANO1", "TRPC1", "REST", "STIM2", "GJA1", "PRF1", …
876	CATION HOMEOSTASIS%GO%GO:0055080	0.00145424	0.00492549	0.45506	0.275332	1.87928	99	c("HTR2B", "PLCE1", "SNCA", "SLC26A4", "ABCG2", "EDNRA", "DRD4", "HFE2", "HEPH", "KCNMA1", "CYBRD1", "ATP6V1G2", "CYSLTR1", "CDH23", "SLC40A1", "PKD2", "SLC30A1", "PDE6A", "EPHX2", "TNNI3", "P2RY1", "ATP7B", "BDH2", "CSRP3", "CCL5", "PDE6B", "FGF2", "RGN", "CAV3", "ITPR1", "SLC22A17", "APP", "ATP2C1", "F2R", "NEDD4L", "COMMD1", "TRPC1", "STIM2", "ATP6V1E2", "IBTK", "VAPB", "BBC3", "RYR2", "CP", "…
877	NOTCH%NETPATH%NOTCH	0.001458	0.00493259	0.45506	0.403403	2.01891	31	c("JAK2", "NOV", "LEF1", "LFNG", "PIK3R1", "JAG1", "FHL1", "MEF2C", "SKP2", "EP300", "APP", "HES5", "MAML2", "PIK3R2", "SIN3A", "RBX1", "FBXW7", "AKT1", "MAML3")
878	G2/M TRANSITION OF MITOTIC CELL CYCLE%GO%GO:0000086	0.00146289	0.00494351	0.45506	0.323056	1.93555	57	c("WEE1", "TPD52L1", "NES", "PLK3", "DYNLL1", "CEP57", "CDKN2B", "CEP290", "PLCB1", "DCTN1", "FGFR1OP", "ANAPC10", "TUBG2", "TAF1", "ALMS1", "CDK5RAP2", "CLASP1", "CEP72", "DYNC1H1", "ODF2", "CEP70", "TUBGCP5", "TERF1", "CETN2", "NUMA1", "FBXL7", "KHDRBS1", "NEDD1", "NDE1", "AKAP9", "CCNA2", "MNAT1", "SDCCAG8", "CCNA1", "PPP2R1A", "CDK7", "PCM1", "CKAP5", "CEP63", "PLK4", "ANAPC4", "CENPJ", "OFD1…
879	AMINO ACID BINDING%GO%GO:0016597	0.0014677	0.00495413	0.45506	0.438841	2.01344	24	c("SYTL2", "NOX4", "GLRB", "SCARB1", "SDPR", "UBR1", "FCHO2", "TRIM72", "SRR", "GAS6", "MARK1", "SESTD1", "LANCL1", "GLUD1", "ANXA9", "GCLC", "GSTM2", "PIN1", "MUT", "NOS3", "UBR2")
880	REGULATION OF NUCLEOCYTOPLASMIC TRANSPORT%GO%GO:0046822	0.00147687	0.0049709	0.45506	0.329648	1.95094	55	c("SOX4", "BMP4", "MDFIC", "XPO4", "TGFB3", "RAB23", "KANK1", "PKD2", "DACT3", "FZD7", "APOD", "BAMBI", "IGF1", "PTPN14", "TPR", "TCF7L2", "DACT1", "DYRK2", "PKD1", "RBPMS", "SIRT1", "BMPR1A", "MDFI")
881	VOLTAGE-GATED CHANNEL ACTIVITY%GO%GO:0022832	0.0014777	0.0049709	0.45506	0.355325	1.9862	44	c("KCNA5", "SCN2B", "KCNT2", "KCNE1", "KCNMA1", "KCNS3", "SCN3B", "SCN4B", "KCNA4", "PKD2", "KCNC4", "KCNK6", "CACNA2D1")
882	VOLTAGE-GATED ION CHANNEL ACTIVITY%GO%GO:0005244	0.0014777	0.0049709	0.45506	0.355325	1.9862	44	c("KCNA5", "SCN2B", "KCNT2", "KCNE1", "KCNMA1", "KCNS3", "SCN3B", "SCN4B", "KCNA4", "PKD2", "KCNC4", "KCNK6", "CACNA2D1")
883	PURINE RIBONUCLEOSIDE BINDING%GO%GO:0032550	0.0014893	0.00499858	0.45506	0.234426	1.73744	158	c("STK38L", "ICK", "BRSK1", "MYH10", "SNRK", "SCG5", "PIF1", "RAB26", "PDK3", "TNIK", "TSSK6", "GAL3ST3", "HSPA4L", "LMTK2", "MAP4K4", "CAMK2G", "GNAI1", "ATP7B", "MSH2", "DYRK2", "SRPK3", "PEX1", "GEM", "MCM4", "NLRP1", "ZAP70", "TLK1", "ABCA2", "DAPK3", "RRAS", "RAB28", "MAP3K1", "CDC42BPB", "PEX6", "BMPR1A", "GCK", "STK36", "P2RX7", "MYO6", "DYRK4", "ATP2C1", "RAB12", "SRR", "CAMK2D", "ILK", "…
884	RIBONUCLEOSIDE BINDING%GO%GO:0032549	0.0014893	0.00499858	0.45506	0.234426	1.73744	158	c("STK38L", "ICK", "BRSK1", "MYH10", "SNRK", "SCG5", "PIF1", "RAB26", "PDK3", "TNIK", "TSSK6", "GAL3ST3", "HSPA4L", "LMTK2", "MAP4K4", "CAMK2G", "GNAI1", "ATP7B", "MSH2", "DYRK2", "SRPK3", "PEX1", "GEM", "MCM4", "NLRP1", "ZAP70", "TLK1", "ABCA2", "DAPK3", "RRAS", "RAB28", "MAP3K1", "CDC42BPB", "PEX6", "BMPR1A", "GCK", "STK36", "P2RX7", "MYO6", "DYRK4", "ATP2C1", "RAB12", "SRR", "CAMK2D", "ILK", "…
885	REGULATION OF CYCLIN-DEPENDENT PROTEIN SERINE/THREONINE KINASE ACTIVITY%GO%GO:0000079	0.00150229	0.00503647	0.45506	0.413089	1.9869	27	c("CCND1", "HERC5", "GADD45A", "CCND2", "PKD2", "MYOCD", "CDKN2B", "PKD1", "CDKN1B", "APC", "PROX1", "CDKN2C", "PSMD10", "GTF2H1", "HEXIM2", "AKT1", "MNAT1", "CDK5RAP3", "CDK7", "CDK5R1")
886	DNA-DEPENDENT TRANSCRIPTION, INITIATION%GO%GO:0006352	0.00151361	0.00506873	0.45506	0.280536	1.90891	98	c("ESR1", "RUNX2", "TCF4", "NPPA", "RORA", "NR2F1", "RARB", "NR2C1", "TRIM33", "NR3C1", "CDKN2B", "MED30", "SUPT3H", "THRA", "UBTF", "NR0B2", "AR", "GTF2F2", "UBB", "TAF1", "UBE2D1", "NR1D2", "SNAPC5", "PPARGC1A", "RSF1", "RRN3", "MED12", "POLR2G", "MAML2", "TFDP2", "NEDD4L", "SMAD7", "ESRRB", "ERCC2", "GTF2H1", "POLR2C", "NR3C2", "SMARCA5", "MED6", "POLR2A", "CDK8", "MAML3", "TBP", "GTF2H3", "ME…
887	IRS-RELATED EVENTS TRIGGERED BY IGF1R%REACTOME%REACT_150203.2	0.00152004	0.00508451	0.45506	0.40114	2.00758	31	c("JAK2", "FGF1", "FGF18", "PIK3R1", "PTPN11", "IGF1", "GAB1", "PDE3B", "PRKAA2", "TSC1", "FGF2", "FGF9", "PRKAB2", "PIK3R2", "IGF1R", "IGF2", "PIK3C3", "STK11")
888	NEGATIVE REGULATION OF TRANSMEMBRANE RECEPTOR PROTEIN SERINE/THREONINE KINASE SIGNALING PATHWAY%GO%GO:0090101	0.00154072	0.00514788	0.45506	0.400822	2.00599	31	c("ADAMTSL2", "FZD1", "DACT2", "PPP1R15A", "DAND5", "BAMBI", "TRIM33", "VWC2", "HTRA3", "MTMR4", "UBB", "SIRT1", "NEDD4L", "SMAD7", "MAGI2", "PPP1CB", "ASPN", "NBL1", "SMAD6", "UBC", "LTBP1", "PIN1", "FST", "USP15")
889	POSITIVE REGULATION OF IMMUNE SYSTEM PROCESS%GO%GO:0002684	0.00155103	0.00517649	0.45506	0.247029	1.78635	140	c("THBS4", "CFH", "THY1", "TNFRSF4", "ENAH", "PAK1", "TGFB2", "DPP4", "COLEC12", "BCL2", "MASP1", "RSAD2", "FYN", "VEGFC", "PIK3R1", "IL33", "PTPN11", "CD47", "PELI2", "GAB2", "DDX60", "TNIP1", "BTN3A1", "HLA-DRB5", "IGF1", "HLA-DRB1", "CD247", "EDN3", "RICTOR", "VCAM1", "POLR3B", "THBS3", "CADM1", "ICOSLG", "DUSP6", "CCL5", "ZAP70", "CLU", "MEF2C", "MAP3K1", "UBB", "SIRT1", "BTLA", "MAPK10", "PI…
890	NEGATIVE REGULATION OF EPITHELIAL CELL PROLIFERATION%GO%GO:0050680	0.00155341	0.00517861	0.45506	0.437253	2.00616	24	c("SULF1", "SFRP1", "APOE", "TGFB2", "SCG2", "SOX9", "ATPIF1", "ROBO1", "CDKN2B", "PTPRM", "SFRP2")
891	HYDROLASE ACTIVITY, ACTING ON CARBON-NITROGEN (BUT NOT PEPTIDE) BONDS%GO%GO:0016810	0.00157791	0.00524904	0.45506	0.448486	2.11801	26	c("HDAC9", "DDAH1", "ASPA", "APOBEC3G", "NAAA", "APOBEC3F", "ASAH1", "MTHFD2L", "CECR1", "HDAC5", "HDAC4", "ADAL", "SIRT1", "MTHFD1", "HDAC3", "AICDA", "AGA", "SIRT5")
892	MULTICELLULAR ORGANISMAL REPRODUCTIVE PROCESS%GO%GO:0048609	0.00157807	0.00524904	0.45506	0.278611	1.86928	92	c("SFRP4", "KIT", "SFRP1", "TGFB2", "TGFB3", "SOX8", "REC8", "OSGIN2", "USP9Y", "PIWIL4", "SOX9", "TSSK6", "HPGD", "ADC", "MAEL", "DPY19L2", "INHBA", "DZIP1", "CYP26B1", "SMO", "DYNLL1", "CEP57", "BBS4", "TCFL5", "MYCBPAP", "PNMA1", "RPL39L", "TDRD6", "GDF9", "BCL2L2", "SPAG4", "APLN", "NPHP1", "KIAA0430", "ZP3", "CCNI", "BBS2", "NPM2", "HERC4", "CTNNB1", "NANOS3", "DMC1", "PRMT7", "VEGFA", "NANO…
893	Neuroactive ligand-receptor interaction%KEGG%hsa04080	0.00160109	0.00531964	0.45506	0.277866	1.90342	100	c("GRIA3", "HTR2B", "F2RL2", "EDNRA", "PTGFR", "GRM1", "DRD4", "GABRE", "CHRNA3", "LEPR", "GLRB", "GABRB1", "LPAR4", "APLNR", "CYSLTR1", "P2RY14", "GZMA", "GRIA1", "S1PR5", "P2RY1", "NR3C1", "GHR", "GABRP", "PTGER4", "THRA", "HRH2", "ADORA2B", "GRIK4", "LHCGR", "GPR83", "PTGER3", "GRM8", "GABRA4", "HTR6", "S1PR2", "P2RX7", "GABBR1", "F2R")
894	PEPTIDYL-AMINO ACID MODIFICATION%GO%GO:0018193	0.0016188	0.00537246	0.45506	0.242881	1.78838	152	c("ST8SIA2", "QPCT", "KIT", "PROS1", "JAK2", "LEF1", "HDAC9", "PRMT2", "APOA1", "DDR1", "LEPREL1", "CLIP3", "MAPK12", "PDK3", "ING4", "MGAT3", "AGBL5", "GFPT1", "LMTK2", "GHR", "FKBP3", "SEC31A", "PKD1", "SUPT3H", "ATM", "SMYD2", "PRKD1", "ZAP70", "FUT8", "HDAC4", "EP400", "FGFR2", "F10", "CDK5", "TAF1", "METAP2", "FGFR3", "ATPBD4", "MAP3K12", "SIRT1", "MLL", "DPM3", "DDR2", "SETD3", "PPIH", "EP3…
895	PURINE RIBONUCLEOTIDE BINDING%GO%GO:0032555	0.00163402	0.00541691	0.45506	0.238375	1.76936	159	c("PDE5A", "STK38L", "ICK", "BRSK1", "MYH10", "SNRK", "SCG5", "PIF1", "RAB26", "PDK3", "TNIK", "TSSK6", "GAL3ST3", "HSPA4L", "LMTK2", "MAP4K4", "CAMK2G", "GNAI1", "ATP7B", "MSH2", "DYRK2", "SRPK3", "PEX1", "GEM", "MCM4", "NLRP1", "ZAP70", "TLK1", "ABCA2", "DAPK3", "RRAS", "RAB28", "MAP3K1", "CDC42BPB", "PEX6", "BMPR1A", "GCK", "STK36", "P2RX7", "MYO6", "DYRK4", "ATP2C1", "RAB12", "SRR", "CAMK2D",…
896	ALPHA6BETA4INTEGRIN%IOB%ALPHA6BETA4INTEGRIN	0.00164936	0.00546166	0.45506	0.410214	1.97307	27	c("PAK1", "FYN", "PIK3R1", "LAMA2", "PTPN11", "DST", "TP73", "AR", "YWHAQ", "ERBB2IP", "PIK3R2", "PIK3CG", "LAMA3", "PRKCA", "ITGB4", "AKT1", "LAMB2")
897	PLATELET ACTIVATION%GO%GO:0030168	0.00165707	0.00548107	0.45506	0.293394	1.9153	79	c("PROS1", "F2RL2", "DGKI", "LEFTY2", "TGFB2", "TGFB3", "COL1A2", "APOA1", "FYN", "VEGFC", "PIK3R1", "RASGRP1", "IGF1", "COL3A1", "ADAMTS13", "P2RY1", "GNAI1", "GP1BA", "GNG2", "ACTN2", "CLU", "ITPR1", "CD36", "APP", "TRPC7", "PIK3R2", "F2R", "MPL", "VCL", "CD9", "ARRB1", "GAS6", "RAP1A", "HABP4", "PIK3CG", "PRKCA", "AKT1")
898	CLATHRIN-COATED VESICLE%GO%GO:0030136	0.00166529	0.00550213	0.45506	0.328825	1.8947	50	c("MME", "SGIP1", "AMPH", "SH3GL2", "RASSF9", "BRSK1", "TYRP1", "SORT1", "HLA-DRB5", "HLA-DRB1", "FCHO2", "TMEM163", "DVL2", "CLTCL1", "SLC17A7", "LDLRAP1", "FAM109A", "MYO6", "AFTPH", "GIPC1", "TPRG1L", "AP2M1", "SVOP", "GOPC", "VAMP2", "ATP7A", "RAB27B", "HLA-DPB1", "HLA-DRA", "CD74", "AAK1")
899	NUCLEOBASE-CONTAINING SMALL MOLECULE METABOLIC PROCESS%GO%GO:0055086	0.00166927	0.00550722	0.45506	0.229975	1.74738	183	c("HTR2B", "PDE5A", "NPPA", "GNB3", "RAB23", "APOBEC3G", "NMNAT2", "NT5C2", "APOBEC3F", "NPPB", "PDE6A", "GNG11", "AK5", "TP53I3", "GFPT1", "RAMP2", "PRTFDC1", "PDE3B", "FMO2", "PTHLH", "RALBP1", "SULT1C4", "DCK", "MSH2", "TK2", "RND3", "PDE8B", "KIF20B", "ADCY2", "PDE6B", "EIF2S3", "FIGNL1", "RAB33A", "DUT", "CECR1", "PMS1", "MACF1", "ABCA2", "NMNAT3", "ADAL", "RAB28", "GLRX", "RAB30", "APOBEC3C…
900	mRNA surveillance pathway%KEGG%hsa03015	0.00167054	0.00550722	0.45506	0.376711	1.9856	36	c("PPP2R2B", "PABPC5", "PPP2R1B", "PPP2R3B", "SRRM1", "SYMPK", "SAP18", "PAPOLG", "PPP2R3A", "FIP1L1", "MSI1", "RNMT", "UPF3B", "CSTF3", "UPF2", "UPF3A", "PCF11", "PNN", "CASC3", "SMG6", "SMG5", "PPP2R1A", "ACIN1", "NUDT21", "PPP2CA", "PABPC4L", "NXF5", "PPP2R3C", "PABPC1L", "CSTF2T")
901	PURINE RIBONUCLEOSIDE TRIPHOSPHATE BINDING%GO%GO:0035639	0.0016743	0.00551349	0.45506	0.241635	1.7681	147	c("STK38L", "ICK", "BRSK1", "MYH10", "SNRK", "SCG5", "PIF1", "RAB26", "PDK3", "TNIK", "TSSK6", "HSPA4L", "LMTK2", "MAP4K4", "CAMK2G", "GNAI1", "ATP7B", "MSH2", "DYRK2", "SRPK3", "PEX1", "GEM", "MCM4", "NLRP1", "ZAP70", "TLK1", "ABCA2", "DAPK3", "RAB28", "MAP3K1", "CDC42BPB", "PEX6", "BMPR1A", "GCK", "STK36", "P2RX7", "DYRK4", "ATP2C1", "SRR", "CAMK2D", "ILK", "LRRK2", "ERCC6", "TAOK1", "STK11", "…
902	ALPHA6BETA4INTEGRIN%NETPATH%ALPHA6BETA4INTEGRIN	0.00168753	0.0055509	0.45506	0.422364	2.05177	28	c("PAK1", "FYN", "PIK3R1", "LAMA2", "PTPN11", "GAB1", "DST", "TP73", "AR", "YWHAQ", "ERBB2IP", "PIK3R2", "PIK3CG", "LAMA3", "PRKCA", "ITGB4", "AKT1", "LAMB2")
903	FATTY ACID TRANSPORT%GO%GO:0015908	0.00170109	0.00558931	0.45506	0.525654	2.03956	15	c("DRD4", "SLC27A6", "ACE", "CPT2", "CPT1B", "PRKAA2", "SLC27A1", "CD36", "PRKAB2", "SLC25A20")
904	TRANSITION METAL ION BINDING%GO%GO:0046914	0.00171475	0.00562793	0.45506	0.245816	1.7767	138	c("QPCT", "PDE5A", "SNCA", "MME", "ENPP2", "ACE2", "ACE", "SOD3", "APOBEC3G", "CRIP1", "ZFP37", "S100A13", "APOBEC3F", "HKR1", "ZNF91", "MSRB3", "MYRIP", "MDM4", "TRIM33", "DPF3", "ADAMTS13", "ATP7B", "MMP23B", "DYRK2", "MSRB2", "TRIM2", "TMEM163", "BAZ1B", "RGN", "CECR1", "HDAC4", "ADH5", "PTGR2", "MPPE1", "GPC1", "HMGCL", "ISCU", "ZMYM2", "MLL", "ZNF3", "HAAO", "ZACN", "ARHGEF2", "FECH", "SLU7"…
905	ZINC ION BINDING%GO%GO:0008270	0.00172516	0.00565585	0.45506	0.267636	1.85714	107	c("QPCT", "PDE5A", "SNCA", "MME", "ENPP2", "ACE2", "ACE", "SOD3", "APOBEC3G", "CRIP1", "ZFP37", "S100A13", "APOBEC3F", "HKR1", "ZNF91", "MSRB3", "MYRIP", "MDM4", "TRIM33", "DPF3", "ADAMTS13", "MMP23B", "MSRB2", "TRIM2", "TMEM163", "BAZ1B", "RGN", "CECR1", "HDAC4", "ADH5", "PTGR2", "ZMYM2", "MLL", "ZNF3", "ZACN", "ARHGEF2", "SLU7", "PAPPA2", "ZNF675", "ERAP1", "TNKS", "EEA1", "LANCL1", "HIF1AN", "…
906	REGULATION OF ION TRANSMEMBRANE TRANSPORT%GO%GO:0034765	0.00173669	0.00568737	0.45506	0.339842	1.98453	52	c("KCNA5", "SCN2B", "CRHBP", "DRD4", "KCNE1", "SCN3B", "SCN4B", "PKD2", "SLC30A1", "DLG4", "SHANK1", "WWP2", "FHL1", "ACTN2", "CAV3", "ASPH", "CACNA1D", "NLGN1", "NEDD4L", "CAMK2D", "NLGN3", "ZP3", "DMD", "STIM2", "HOMER1", "AKT1", "RYR2", "CTNNB1")
907	Glutamatergic synapse%KEGG%hsa04724	0.00174412	0.0057004	0.45506	0.327974	1.8898	50	c("GRIA3", "SLC1A7", "GRM1", "GNB3", "GNG11", "DLG4", "SHANK1", "GRIA1", "GNAI1", "SLC38A3", "GNG2", "PLCB1", "ADCY2", "PLCB4", "GRIK4", "SLC17A7", "ITPR1", "GRM8", "CACNA1D", "GLS2", "TRPC1", "HOMER1", "PRKCA", "DLGAP1", "GNG7", "SLC1A2")
908	Olfactory transduction%KEGG%hsa04740	0.00174451	0.0057004	0.45506	-0.24316	-2.17464	49	c("OR8D2", "OR2D2", "OR51I1", "OR2T29", "OR4X2", "OR5AP2", "OR7A17", "PRKACG", "OR6A2", "GNAL", "OR2A2", "OR7G2", "OR6C76", "OR10H3", "GUCA1A", "OR6N2", "OR2B2", "OR1D2", "OR2L3", "OR2AG1", "OR6C4", "OR2H1", "OR14I1", "OR2A5", "OR10G7", "OR2J3", "OR11H6")
909	MONOCARBOXYLIC ACID METABOLIC PROCESS%GO%GO:0032787	0.00176246	0.00574454	0.45506	0.263294	1.84899	114	c("ALDH1A2", "SLC27A6", "ACADL", "ELOVL4", "CYP2J2", "LTC4S", "ALDH5A1", "PDK3", "HPGD", "ALDH4A1", "IGF1", "CPT2", "CYP46A1", "DECR2", "CYP26B1", "ACOT4", "CSPG5", "GHR", "PLA2G4C", "CHST14", "BDH2", "ABAT", "PTGR2", "PLA2G15", "ACOX1", "PPARGC1A", "ACOT1", "ACOX2", "ACAD11", "LPL", "BSG", "CYP7B1", "LIAS", "ACADM", "SRR", "PCCB", "STAT5B", "SCP2", "PHYH", "AASDH", "MLYCD", "MCEE", "BGN", "MGST2…
910	DETECTION OF STIMULUS%GO%GO:0051606	0.0017628	0.00574454	0.45506	0.327656	1.92783	53	c("KIT", "SOX4", "TGFB3", "ELOVL4", "PLEKHB1", "PKD2", "SCARB1", "PKD1L1", "KCNMB4", "KCNIP1", "RTP4", "KCNMB2", "HLA-DRB1", "SMO", "CADM1", "PKD1", "CSRP3", "PDE6B", "ASPH", "GCK", "LOXHD1", "ABCA4", "OR51E2")
911	NEGATIVE REGULATION OF INTRACELLULAR PROTEIN KINASE CASCADE%GO%GO:0010741	0.00176383	0.00574454	0.45506	0.341711	1.96161	49	c("SFRP4", "BMP4", "UCHL1", "ESR1", "RGS4", "APOE", "STK38L", "CNKSR3", "TNIP1", "DACT1", "DUSP6", "TP73", "DUSP16", "CAV3", "ZMYND11", "SIRT1", "DUSP8", "P2RX7", "PSMD10", "ZNF675", "HDAC3", "RGS3", "IGF1R", "MAGI2", "TLE1", "NF1", "RGS14", "PPP2R1A", "MBIP", "PIN1", "DAB2IP", "DUSP3", "PPP2CA")
912	REGULATION OF IMMUNE SYSTEM PROCESS%GO%GO:0002682	0.00179479	0.00583899	0.45506	0.209007	1.66168	250	c("THBS4", "KIT", "PROS1", "CFH", "THY1", "TNFRSF4", "SFRP1", "JAK2", "BMP4", "LEF1", "ENAH", "PAK1", "TGFB2", "HERC5", "IFIT1", "TGFB3", "DPP4", "COLEC12", "APOA1", "BCL2", "MASP1", "APOBEC3G", "RSAD2", "FYN", "VEGFC", "PIK3R1", "PACS1", "APOBEC3F", "IL33", "PTPN11", "CD47", "PELI2", "GAB2", "SOX9", "DDX60", "TNIP1", "JAM3", "APOD", "BTN3A1", "INHBA", "HLA-DRB5", "HMGB2", "IGF1", "HLA-DRB1", "CD…
913	APPENDAGE DEVELOPMENT%GO%GO:0048736	0.00181052	0.00587725	0.45506	0.431972	1.98192	24	c("COMP", "SOX4", "BMP4", "LEF1", "AFF3", "PCSK5", "INTU", "LRP5", "CYP26B1", "FGFR2", "TBX3")
914	LIMB DEVELOPMENT%GO%GO:0060173	0.00181052	0.00587725	0.45506	0.431972	1.98192	24	c("COMP", "SOX4", "BMP4", "LEF1", "AFF3", "PCSK5", "INTU", "LRP5", "CYP26B1", "FGFR2", "TBX3")
915	CELLULAR CATION HOMEOSTASIS%GO%GO:0030003	0.00181631	0.00588959	0.45506	0.284731	1.89602	87	c("HTR2B", "PLCE1", "ABCG2", "EDNRA", "DRD4", "HEPH", "KCNMA1", "CYBRD1", "ATP6V1G2", "CYSLTR1", "CDH23", "SLC40A1", "PKD2", "SLC30A1", "PDE6A", "EPHX2", "TNNI3", "P2RY1", "ATP7B", "CSRP3", "CCL5", "PDE6B", "FGF2", "RGN", "CAV3", "ITPR1", "SLC22A17", "APP", "ATP2C1", "F2R", "NEDD4L", "TRPC1", "STIM2", "ATP6V1E2", "IBTK", "VAPB", "BBC3", "RYR2", "CP", "ATP6V1B1", "SRI", "FTH1", "SLC8A1", "ATP6V1D"…
916	TRANSMISSION ACROSS CHEMICAL SYNAPSES%REACTOME%REACT_13477.2	0.00186538	0.00604212	0.45506	0.293132	1.91577	80	c("GRIA3", "SLC1A7", "SLC6A1", "GNB3", "CHRNA3", "CACNA2D2", "GABRB1", "CAMK2B", "SLC5A7", "GNG11", "DLG4", "ALDH5A1", "GRIA1", "CACNA1B", "SLC6A12", "EPB41L1", "CAMK2G", "GNAI1", "ARHGEF9", "GNG2", "PLCB1", "ADCY2", "GRIK4", "ACTN2", "RRAS", "ABAT", "CAMK2A", "SLC17A7", "GABRA4", "MYO6", "GABBR1", "CAMK2D", "KCNJ2", "SLC6A13", "GLS2")
917	AMIDE BINDING%GO%GO:0033218	0.00187303	0.00606028	0.45506	0.372715	1.99329	39	c("NPR3", "MME", "APOE", "CRHBP", "TGFB2", "APOA1", "PCSK5", "CRIP1", "APBB2", "PIK3R1", "INHBA", "HLA-DRB1", "PEX7", "GHR", "PPIG")
918	CIRCADIAN CLOCK%REACTOME%REACT_24941.3	0.00188048	0.00607775	0.45506	0.407886	1.96187	27	c("DBP", "PER2", "RORA", "BTRC", "CRY2", "NR3C1", "TBL1XR1", "MEF2C", "UBB", "PPARGC1A", "EP300", "NCOA2", "HDAC3", "CLOCK", "CHD9", "MEF2D", "SMARCD3", "UBC", "ATF2")
919	MONOVALENT INORGANIC CATION TRANSPORT%GO%GO:0015672	0.0018828	0.00607863	0.45506	0.309182	1.96856	71	c("KCNA5", "SCN2B", "KCNT2", "KCNMB1", "KCNE1", "KCNMA1", "ATP1B4", "KCNS3", "ABCC8", "SCN3B", "SCN4B", "KCNAB1", "KCNA4", "PKD2", "KCNC4", "UCP2", "KCNK6", "KCNMB4", "KCNMB2", "ATP5S", "NNT", "KCNK17", "KCNS1", "ATP1A2", "SLC38A7", "SCN3A", "SCN4A", "SCNN1B", "NEDD4L", "KCNJ2", "SCN7A")
920	OLIGOSACCHARIDE METABOLIC PROCESS%GO%GO:0009311	0.00188556	0.00608094	0.45506	0.475469	1.96333	18	c("ST8SIA2", "ST8SIA4", "ST6GAL2", "GAL3ST3", "FUT8", "ST3GAL6", "IDUA", "MGAT4B", "ST6GALNAC6", "MAN1B1", "PGM1", "MAN1A2", "PGM5")
921	PURINE NUCLEOSIDE BINDING%GO%GO:0001883	0.00191115	0.00615677	0.45506	0.236679	1.75678	159	c("STK38L", "ICK", "BRSK1", "MYH10", "SNRK", "SCG5", "PIF1", "RAB26", "PDK3", "TNIK", "TSSK6", "GAL3ST3", "HSPA4L", "LMTK2", "MAP4K4", "CAMK2G", "GNAI1", "ATP7B", "MSH2", "DYRK2", "SRPK3", "PEX1", "GEM", "MCM4", "NLRP1", "ZAP70", "TLK1", "ABCA2", "DAPK3", "RRAS", "RAB28", "MAP3K1", "CDC42BPB", "PEX6", "BMPR1A", "GCK", "STK36", "P2RX7", "MYO6", "DYRK4", "ATP2C1", "RAB12", "SRR", "CAMK2D", "ILK", "…
922	POSITIVE REGULATION OF ENDOTHELIAL CELL PROLIFERATION%GO%GO:0001938	0.00193908	0.00623995	0.45506	0.440683	1.99416	23	c("THBS4", "HTR2B", "BMP4", "SCG2", "HMGB2", "NRP1", "THBS3", "BMPR2", "PRKD1", "FGF2", "TNFSF12", "PROX1", "PRKCA", "AGGF1", "VEGFA", "VEGFB")
923	MAMMARY GLAND DEVELOPMENT%GO%GO:0030879	0.001953	0.00627146	0.45506	0.469814	2.00754	20	c("SFRP4", "FRZB", "JAK2", "LEF1", "TGFB3", "LRP5", "IRF6", "ID2", "FGFR2", "TBX3", "APLN")
924	NEGATIVE REGULATION OF PROTEIN TRANSPORT%GO%GO:0051224	0.00195309	0.00627146	0.45506	0.397351	2.02471	32	c("SOX4", "MDFIC", "DRD4", "RAB23", "APOA1", "RSAD2", "PKD2", "DACT3", "APOD", "DYRK2", "PKD1", "PTGER4", "WWP2", "MDFI", "F2R", "PSMD10", "GAS6", "SERGEF", "GOPC", "NF1", "C1QTNF3")
925	CELLULAR AMINO ACID CATABOLIC PROCESS%GO%GO:0009063	0.00197357	0.00633034	0.431708	0.339578	1.91368	46	c("DDAH1", "ASPA", "CDO1", "CSAD", "ALDH5A1", "ALDH4A1", "HGD", "IVD", "BCKDHA", "ABAT", "HMGCL", "ACADSB", "HAAO", "ALDH6A1", "AUH", "HIBADH", "HIBCH", "AFMID", "GLUD1", "DBT", "AADAT", "ACAD8", "PCBD1", "QDPR", "SUOX", "ACAT1", "ALDH7A1", "DLD", "GOT2", "DLST", "MRPL12", "DDAH2", "NOS3")
926	STRUCTURAL CONSTITUENT OF CYTOSKELETON%GO%GO:0005200	0.00198193	0.0063503	0.431708	0.430033	1.97303	24	c("AGRN", "BFSP1", "SORBS2", "SPTBN1", "BICD1", "ANK1", "SPTAN1", "ADD3", "SYNM", "MAPT", "KRT17", "ERBB2IP", "TUBE1", "DMD")
927	REGULATION OF CELL CYCLE PHASE TRANSITION%GO%GO:1901987	0.00198698	0.00635195	0.431708	0.350417	1.96659	45	c("SOX4", "PRMT2", "PKD2", "CRADD", "PPP1R1C", "TPR", "DACT1", "PKD1", "KANK2", "ATM", "BUB1", "FHL1", "ID2", "ANAPC10", "UBB", "MAD2L1", "UBE2D1", "CDKN1B", "APC", "TERF1", "PSMD10", "PSMB10", "BRD7")
928	REGULATION OF MITOTIC CELL CYCLE PHASE TRANSITION%GO%GO:1901990	0.00198698	0.00635195	0.431708	0.350417	1.96659	45	c("SOX4", "PRMT2", "PKD2", "CRADD", "PPP1R1C", "TPR", "DACT1", "PKD1", "KANK2", "ATM", "BUB1", "FHL1", "ID2", "ANAPC10", "UBB", "MAD2L1", "UBE2D1", "CDKN1B", "APC", "TERF1", "PSMD10", "PSMB10", "BRD7")
929	VOLTAGE-GATED POTASSIUM CHANNEL ACTIVITY%GO%GO:0005249	0.00198887	0.00635195	0.431708	0.451236	2.00872	22	c("KCNA5", "KCNT2", "KCNE1", "KCNMA1", "KCNS3", "KCNA4", "KCNC4", "KCNK6")
930	RIBONUCLEOPROTEIN COMPLEX%GO%GO:0030529	0.00199336	0.00635465	0.431708	0.24155	1.74346	136	c("IVNS1ABP", "APOBEC3G", "RPS4Y1", "APOBEC3F", "WTIP", "PIWIL4", "SYF2", "MAEL", "APOD", "PPIL3", "ZCRB1", "RPL39L", "MRPL10", "TDRD6", "SRRM1", "HBA2", "DCP2", "RPL31", "BRCA1", "SNRPN", "SNURF", "PNRC2", "PPIH", "TNRC6A", "RBM5", "MRPS33", "STAU1", "CRNKL1", "SLU7", "SRA1", "RPS23", "MRPL40", "CNOT3", "SKIV2L2", "PPWD1", "EPM2A", "MRPS14", "ISY1", "RNPC3", "PRPF31", "SQSTM1", "MRPS25", "MRPL35…
931	RUFFLE%GO%GO:0001726	0.001994	0.00635465	0.431708	0.396989	2.02286	32	c("PAK1", "S100A6", "KANK1", "IFIT5", "AMOT", "ALS2", "SH3YL1", "FGD5", "MACF1", "BRCA1", "PACSIN1", "ARHGEF2", "COBL", "MYO6", "APC", "FGD6", "MTMR14", "PDXP", "TIRAP", "MTM1", "DDX58")
932	REGULATION OF PEPTIDASE ACTIVITY%GO%GO:0052547	0.00199832	0.0063616	0.431708	0.290016	1.89325	79	c("SERPINE2", "SNCA", "PROS1", "SFRP1", "JAK2", "SERPINI1", "LEF1", "TPD52L1", "TNFSF10", "RECK", "PCOLCE2", "SERPINF1", "MAP2K5", "PERP", "SOX7", "KIAA0141", "SIAH2", "ROBO1", "BCL2L11", "SPINT2", "VTN", "NLRP1", "ASPH", "ITIH4", "FAM162A", "CDKN1B", "SIRT1", "MOAP1", "FNIP1", "EPHA7", "F2R", "TERF1", "GAS6", "REST", "PZP")
933	DIRECT P53 EFFECTORS%PATHWAY INTERACTION DATABASE NCI-NATURE CURATED DATA%DIRECT P53 EFFECTORS	0.0020056	0.00637795	0.431708	0.317977	1.90511	57	c("IGFBP3", "GDF15", "GADD45A", "SCN3B", "BCL2", "TYRP1", "TP53INP1", "PERP", "TP53I3", "PLK3", "S100A2", "MAP4K4", "MSH2", "TNFRSF10C", "PRDM1", "TP73", "BCL2L2", "EP300", "APC", "BNIP3L", "NFYC", "DDB2", "JMY", "PCNA", "PPM1J", "SESN1", "BBC3", "AIFM2", "TRRAP", "PMS2", "SH2D1A", "PPP1R13B", "HDAC2", "MLH1", "NFYA", "TP63", "VCAN", "E2F1", "NFYB")
934	ANCHORING JUNCTION%GO%GO:0070161	0.00201323	0.00639536	0.431708	0.339176	1.91142	46	c("ENAH", "EVL", "LIMA1", "EPHX2", "AFAP1", "PDLIM7", "JAM3", "PTPRM", "PLEKHA7", "SHROOM2", "SYNM", "ACTN2", "CTNNA3", "PNMA1", "FGFR3", "SORBS1", "BRCA1", "LPXN", "APC", "SYNE2", "SMAD7", "VCL", "PKP2")
935	DENDRITIC SPINE HEAD%GO%GO:0044327	0.0020192	0.00639871	0.431708	0.467531	1.99779	20	c("CHRNA3", "SIPA1L1", "DLG4", "SHANK1", "GRIA1", "P2RY1", "CDK5", "NLGN1", "MAGI2", "SRGAP2", "PDLIM5", "RGS14", "CACNG8", "DNM3", "CDK5R1", "CNIH2", "SRCIN1", "CACNA1C", "MTMR2")
936	POSTSYNAPTIC DENSITY%GO%GO:0014069	0.0020192	0.00639871	0.431708	0.467531	1.99779	20	c("CHRNA3", "SIPA1L1", "DLG4", "SHANK1", "GRIA1", "P2RY1", "CDK5", "NLGN1", "MAGI2", "SRGAP2", "PDLIM5", "RGS14", "CACNG8", "DNM3", "CDK5R1", "CNIH2", "SRCIN1", "CACNA1C", "MTMR2")
937	REGULATION OF RAS FAMILY ACTIVATION%PATHWAY INTERACTION DATABASE NCI-NATURE CURATED DATA%REGULATION OF RAS FAMILY ACTIVATION	0.00202076	0.00639871	0.431708	0.519552	2.01588	15	c("PLCE1", "CAMK2B", "RASGRP1", "RRAS", "SOS2", "SYNGAP1", "KCTD7", "RASGRP3", "PRKCA", "NF1", "RASA1", "DAB2IP", "PRKCZ", "LGALS1")
938	ORGANELLE FISSION%GO%GO:0048285	0.00203012	0.0064215	0.431708	0.281837	1.85218	82	c("CENPA", "NDC80", "NUSAP1", "PEX11G", "NCAPD3", "STAG2", "NCAPD2", "BUB1", "DCTN1", "ANAPC10", "CLTCL1", "MAD2L1", "CLASP1", "ACOX1", "DSN1", "NUP37", "SUGT1", "KIF23", "KIF15", "MFF", "RAD21", "CENPC1", "CETN2", "NUMA1", "TAOK1", "FBXL7", "SMC3", "SMC4", "CHMP1A", "OPA1", "GDAP1", "NDE1", "SMC2", "SETDB2", "PPP1R12A", "NEK3", "USP16", "APITD1", "ACOT8", "FIS1", "PDS5B", "AURKC", "PEX11A", "KIF…
939	NCAM SIGNALING FOR NEURITE OUT-GROWTH%REACTOME%REACT_18334.1	0.00204164	0.00645062	0.431708	0.404285	1.98889	29	c("ST8SIA2", "COL9A1", "JAK2", "AGRN", "COL9A2", "ST8SIA4", "FYN", "PTPN11", "SPTBN1", "SPTAN1", "COL4A5", "PTPRA")
940	POSITIVE REGULATION OF MUSCLE CELL DIFFERENTIATION%GO%GO:0051149	0.00204367	0.00645062	0.431708	0.475923	2.00518	19	c("BMP4", "BOC", "IGFBP3", "MYOCD", "MAPK12", "PLCB1", "EFNB2", "MEF2C", "GPC1", "MESP1", "HIF1AN", "MEF2A", "CTNNB1")
941	REGULATION OF HEART CONTRACTION%GO%GO:0008016	0.00206421	0.00650727	0.431708	0.354098	1.93488	41	c("KCNA5", "SCN2B", "KCNE1", "TGFB2", "CYP2J2", "SCN3B", "SCN4B", "EDN3", "CSRP3", "CAV3", "ASPH", "CACNA1D", "CAMK2D", "SMAD7", "PKP2", "DMD", "PIK3CG", "GJA1", "MEF2A", "RYR2", "CHRM2", "S100A1", "SRI", "SLC8A1", "CASQ2", "PLN", "DSC2", "GSTM2")
[truncated: 2,026 more rows]

## Sheet: Massey
	pathway	pval	padj	log2err	ES	NES	size	leadingEdge
[truncated: 2,472 more rows]

## Sheet: Colley
	pathway	pval	padj	log2err	ES	NES	size	leadingEdge
[truncated: 2,200 more rows]

[truncated: 4 more sheets: Keener, Elo, PageRank, BiPageRank]
