# Supplementary material for: GeneCompete: an integrative tool of a novel union algorithm with various ranking techniques for multiple gene expression data
Source: PeerJ Comput Sci. 2023 Nov 15;9:e1686. doi: 10.7717/peerj-cs.1686 (PMC10703088; doi:10.7717/peerj-cs.1686)
Supplement: Supplemental Information 16 [file peerj-cs-09-1686-s016.xlsx]

## Sheet: Win-loss
	pathway	pval	padj	log2err	ES	NES	size	leadingEdge
1	ORGANIC SUBSTANCE TRANSPORT%GO%GO:0071702	7.67528e-34	2.53438e-30	1.51611	0.395742	2.87061	499	c("HK2", "SLCO4A1", "APOB", "SLC2A1", "SLC2A3", "SLC1A5", "HK3", "SYK", "SLC5A1", "CA14", "PDPN", "SLC11A1", "CD209", "BCL6", "PPARG", "STAT3", "SLC38A1", "CEL", "PLEK", "NKD2", "SLC36A4", "EDN1", "SLC1A3", "SLC36A1", "ABCG1", "SSR3", "AQP9", "SLC38A2", "TFRC", "SLC4A7", "SLC7A8", "TST", "SLC6A6", "SLC4A3", "RPS27", "MSR1", "SLC29A2", "RPN1", "TNPO1", "FOLR2", "SEC61A1", "SLC2A5", "SLCO2A1", "PDI…
2	REGULATION OF IMMUNE SYSTEM PROCESS%GO%GO:0002682	9.81635e-32	1.62068e-28	1.46752	0.411541	2.93894	393	c("FCN3", "CCL2", "C3", "SOCS3", "BIRC3", "CFD", "SYK", "DOCK2", "WAS", "MEIS1", "NCKAP1L", "CD38", "MAFB", "SLC11A1", "MAP3K8", "CD209", "C1R", "BCL6", "TYROBP", "CCR1", "PPARG", "MYC", "SAMSN1", "HCLS1", "TLR4", "PVR", "HMOX1", "C1QC", "PLSCR1", "TLR2", "BTK", "CD86", "MARCO", "SAMHD1", "HIF1A", "MOG", "IL6R", "CCL21", "IRAK1", "THBS1", "TGFBR2", "STXBP2", "PIK3R3", "SOCS1", "C1S", "NOD2", "HLA…
3	IMMUNE RESPONSE%GO%GO:0006955	4.31002e-29	4.1812e-26	1.40259	0.404998	2.88865	375	c("FCN3", "CCL2", "C3", "CTSC", "SOCS3", "IFI30", "CFD", "IL18R1", "SYK", "DOCK2", "WAS", "CTSB", "SLC11A1", "IRF8", "C1R", "ISG20", "CCR1", "PPARG", "IL1R1", "TLR4", "LCP1", "IL1RL1", "C1QC", "CYBB", "TGFBR3", "TFE3", "TLR2", "BTK", "AQP4", "CD86", "SAMHD1", "AQP9", "IL6R", "CYBA", "IRAK1", "THBS1", "STXBP2", "IFITM2", "PRKCD", "SOCS1", "C1S", "NOD2", "HLA-DRA", "CALCOCO2", "DDX3X", "IGSF6", "CT…
4	ESTABLISHMENT OF PROTEIN LOCALIZATION%GO%GO:0045184	5.06505e-29	4.1812e-26	1.39519	0.441331	3.07266	285	c("BCL6", "PPARG", "STAT3", "PLEK", "NKD2", "ABCG1", "SSR3", "TFRC", "RPS27", "RPN1", "TNPO1", "SEC61A1", "PDIA4", "TESC", "RAMP1", "SDCBP", "GGA1", "KPNA2", "UNC93B1", "BCL3", "SRPRB", "SPCS3", "NGFR", "RAB8B", "STEAP3", "CLTC", "CBLB", "SCAMP2", "RPLP0", "BID", "RPS19", "EIF5A", "DERL1", "AKR1C3", "RPN2", "ATP6V1A", "CD74", "RPL34", "RPGR", "S100A12", "TAP1", "RPL27A", "RPS5", "PDE2A", "RPL29",…
5	PROTEIN LOCALIZATION%GO%GO:0008104	8.66261e-29	5.72079e-26	1.39519	0.401003	2.86186	388	c("BMP7", "FGF7", "HEY2", "BCL6", "SRGN", "PPARG", "STAT3", "PLEK", "NKD2", "ABCG1", "SSR3", "TFRC", "RPS27", "RPN1", "EPB41L3", "TNPO1", "SEC61A1", "PTPRU", "FBN2", "PDIA4", "MYO5A", "TESC", "RAMP1", "AXIN2", "SDCBP", "GGA1", "KPNA2", "CD4", "UNC93B1", "BCL3", "IL10", "SRPRB", "SPCS3", "NGFR", "RAB8B", "STEAP3", "CLTC", "CBLB", "SCAMP2", "WNT5A", "RPLP0", "FERMT2", "BID", "RPS19", "EIF5A", "DERL…
6	POSITIVE REGULATION OF RESPONSE TO STIMULUS%GO%GO:0048584	1.66483e-28	9.1621e-26	1.38775	0.373931	2.70749	485	c("FCN3", "C3", "BMP7", "LMCD1", "FPR1", "PLA2G2A", "S100A9", "BIRC3", "CFD", "OSMR", "SYK", "WAS", "PDGFRA", "NCKAP1L", "CD38", "TGFA", "SLC11A1", "C1R", "S100A8", "ABRA", "CCR1", "MYC", "STAT3", "CSF1R", "HCLS1", "TLR4", "PVR", "HMOX1", "C1QC", "PLSCR1", "ACVRL1", "EDN1", "TLR2", "BTK", "MARCO", "MAP3K6", "HIF1A", "MOG", "AKR1C2", "IL6R", "CCL21", "IRAK1", "THBS1", "PRKCD", "ITGA5", "C1S", "NOD…
7	PROTEIN TRANSPORT%GO%GO:0015031	2.682e-28	1.26514e-25	1.38026	0.441815	3.07305	277	c("BCL6", "PPARG", "STAT3", "PLEK", "NKD2", "ABCG1", "SSR3", "TFRC", "RPS27", "RPN1", "TNPO1", "SEC61A1", "PDIA4", "TESC", "RAMP1", "SDCBP", "GGA1", "KPNA2", "UNC93B1", "BCL3", "SRPRB", "SPCS3", "NGFR", "RAB8B", "STEAP3", "CLTC", "CBLB", "SCAMP2", "RPLP0", "RPS19", "EIF5A", "DERL1", "AKR1C3", "RPN2", "ATP6V1A", "CD74", "RPL34", "RPGR", "S100A12", "TAP1", "RPL27A", "RPS5", "PDE2A", "RPL29", "RPL18…
8	MACROMOLECULE LOCALIZATION%GO%GO:0033036	4.57213e-28	1.88715e-25	1.37274	0.373285	2.69815	475	c("BMP7", "APOB", "FGF7", "HEY2", "BCL6", "SRGN", "PPARG", "STAT3", "CEL", "PLEK", "NKD2", "ABCG1", "SSR3", "TFRC", "TST", "RPS27", "MSR1", "RPN1", "EPB41L3", "TNPO1", "SEC61A1", "SLCO2A1", "PTPRU", "FBN2", "PDIA4", "MYO5A", "TESC", "RAMP1", "ATP11C", "AXIN2", "SDCBP", "GGA1", "KPNA2", "CD4", "UNC93B1", "BCL3", "IL10", "SRPRB", "SPCS3", "ACACB", "NGFR", "RAB8B", "STEAP3", "CLTC", "CBLB", "SCAMP2"…
9	DEFENSE RESPONSE%GO%GO:0006952	7.44395e-28	2.7311e-25	1.37274	0.395157	2.82375	398	c("FCN3", "CCL2", "C3", "SOCS3", "CCL11", "SERPINA3", "PLA2G2A", "IFI30", "S100A9", "CFD", "SYK", "WAS", "CTSB", "SLC11A1", "IRF8", "PTX3", "LILRB5", "C1R", "S100A8", "RNASE6", "ISG20", "TYROBP", "CCR1", "PPARG", "CSF1R", "TLR4", "HMOX1", "C1QC", "PLSCR1", "AOX1", "CYBB", "TLR2", "BTK", "AQP4", "SAMHD1", "C3AR1", "HIF1A", "IL6R", "CYBA", "CCL21", "IRAK1", "THBS1", "IFITM2", "PRKCD", "SOCS1", "C1S…
10	RESPONSE TO WOUNDING%GO%GO:0009611	8.62886e-27	2.84925e-24	1.34223	0.393166	2.80541	379	c("CCL2", "GRB14", "ATP2A2", "APOB", "CCL11", "FGF7", "SERPINA3", "ATP1B3", "ATP1B1", "S100A9", "CFD", "F13A1", "SYK", "FCER1G", "F5", "WAS", "PDGFRA", "FERMT3", "SLC11A1", "LYVE1", "PTX3", "S100A8", "SRGN", "CCR1", "LRP8", "TFPI", "CSF1R", "F8", "CD58", "APBB1IP", "PLEK", "HMOX1", "PLSCR1", "PLAU", "AOX1", "CYBB", "ACVRL1", "SERPINA1", "CD59", "C3AR1", "HIF1A", "IL6R", "CYBA", "CCL21", "THBS1", …
11	MULTI-ORGANISM PROCESS%GO%GO:0051704	1.29851e-26	3.89788e-24	1.3345	0.371567	2.66712	435	c("CORIN", "CCL2", "APOB", "CCL11", "PLA2G2A", "S100A9", "SYK", "DOCK2", "ENO1", "SLC11A1", "CD209", "S100A8", "ISG20", "TLR4", "PLSCR1", "CYBB", "TLR2", "XRCC4", "SAMHD1", "IL6R", "CYBA", "IRAK1", "IFITM2", "PRKCD", "RPS27", "SELE", "STAB1", "NOD2", "CALCOCO2", "DDX3X", "MAFF", "SERPINE1", "LY96", "DCLK1", "PRKRA", "PSME2", "IRF1", "FOSL1", "FGR", "CD4", "B2M", "PSMD8", "AXL", "SPP1", "BCL3", "C…
12	METABOLISM OF PROTEINS%REACTOME%REACT_17015.4	2.71086e-26	7.45939e-24	1.32672	0.398569	2.83792	370	c("CCL2", "GFPT2", "ATF3", "EIF4EBP1", "TSPYL2", "ANPEP", "TUBA1C", "ALG3", "SSR3", "RPS27", "ATF4", "RPN1", "EIF4G1", "SEC61A1", "MCFD2", "MYO5A", "CCT2", "EIF5", "CPA3", "ST3GAL1", "EDEM2", "ASNS", "TUBA1B", "GNPNAT1", "SRPRB", "B4GALT6", "SPCS3", "SPHK1", "MMP2", "EIF4A1", "RPLP0", "SLC25A13", "MGAT4A", "PIGA", "DNAJB9", "RPS19", "ADD1", "EIF5A", "PMM2", "RPN2", "EXOSC4", "ENPEP", "RPL34", "AL…
13	DISEASE%REACTOME%REACT_116125.4	1.14949e-25	2.91972e-23	1.31101	0.36795	2.6477	447	c("APOB", "FGF7", "DOCK2", "PDGFRA", "CHST7", "HEY2", "SLC11A1", "LYVE1", "RDH10", "HAS2", "LRP8", "MYC", "STAT3", "CDKN1A", "ADCY3", "CYBB", "CD86", "XRCC4", "HIF1A", "IL6R", "CYBA", "PRKAR2A", "PIK3R3", "PRKCD", "RPS27", "CD44", "IDH1", "TGFBI", "RDH5", "CHSY1", "ST3GAL1", "PSME2", "CD4", "B2M", "PSMD8", "LYZ", "B4GALT6", "HSPA1B", "CSPG4", "SH3KBP1", "RPLP0", "EPN1", "HYAL2", "RPS19", "HS3ST2"…
14	REGULATION OF PROTEIN MODIFICATION PROCESS%GO%GO:0031399	4.09398e-25	9.65594e-23	1.30309	0.366204	2.63813	453	c("CCL2", "C3", "BMP7", "BLM", "SOCS3", "FPR1", "FGF7", "ATF3", "NCKAP1L", "TSPYL2", "TGFA", "SLC11A1", "PIM1", "WNK3", "LRP8", "CDKN1A", "SAMSN1", "CSF1R", "HCLS1", "TLR4", "DDIT4", "ADCY3", "ACVRL1", "EDN1", "MAP3K6", "IL6R", "CCL21", "IRAK1", "THBS1", "PRKAR2A", "TGFBR2", "G6PD", "PRKCD", "ITGA5", "ATF4", "DUSP2", "SOCS1", "NOD2", "NGF", "CCNG1", "DAB2", "PPP2R5A", "SPI1", "DUSP1", "RAMP1", "A…
15	ENDOPLASMIC RETICULUM%GO%GO:0005783	9.00152e-25	1.98153e-22	1.2871	0.359711	2.59948	473	c("LPCAT3", "MGST1", "ATP2A2", "APOB", "SGPP2", "PLA2G2A", "PTDSS1", "ATP1A1", "PLP2", "CDS1", "CYP4B1", "SREBF1", "ALG3", "HMOX1", "EBP", "MPDU1", "RHBDF2", "POR", "SLC36A1", "TPST2", "P4HB", "PRKCD", "TBXAS1", "TMED5", "RPN1", "HLA-DRA", "SEC61A1", "SLC39A14", "ALOX5AP", "MAGT1", "ATP11C", "HM13", "FNDC4", "TMED3", "PTGIS", "EDEM2", "CD4", "B2M", "RETSAT", "UNC93B1", "LPCAT4", "RRBP1", "SRPRB",…
16	ION BINDING%GO%GO:0043167	1.14324e-24	2.35937e-22	1.2871	0.354663	2.56945	491	c("BLM", "APOB", "ADH1B", "TUBA3D", "S100A9", "KCNIP2", "HK3", "SPOCK1", "FGF12", "GNMT", "CBS", "PIM1", "MT1X", "WNK3", "S100A8", "PDE4D", "PPARG", "CEL", "PLEK", "LCP1", "PLSCR1", "CYBB", "ALOX5", "ACVRL1", "TGFBR3", "BTK", "SHMT1", "ABCG1", "MAP3K6", "ADA", "AKR1C2", "THBS1", "GALK1", "GNL3", "RPS27", "SELE", "FABP5", "ALOX5AP", "S100P", "TESC", "GCA", "NME1", "IDH1", "ABLIM3", "WNK1", "CD4", …
17	CELLULAR PROTEIN LOCALIZATION%GO%GO:0034613	1.87579e-24	3.64344e-22	1.27903	0.400767	2.81648	319	c("BMP7", "FGF7", "HEY2", "BCL6", "SRGN", "STAT3", "NKD2", "SSR3", "RPS27", "RPN1", "EPB41L3", "TNPO1", "SEC61A1", "PTPRU", "MYO5A", "TESC", "RAMP1", "AXIN2", "SDCBP", "GGA1", "KPNA2", "CD4", "UNC93B1", "BCL3", "IL10", "SRPRB", "SPCS3", "NGFR", "RAB8B", "CLTC", "CBLB", "WNT5A", "RPLP0", "FERMT2", "BID", "RPS19", "EIF5A", "DERL1", "MUSK", "AKR1C3", "CD63", "FBLN5", "RPN2", "CD74", "RPL34", "LMNA",…
18	INTRACELLULAR TRANSPORT%GO%GO:0046907	2.74394e-24	5.0336e-22	1.27903	0.360066	2.58456	435	c("ATP2A2", "HOOK1", "NUDT4", "CD209", "TUBA1C", "BCL6", "STAT3", "NKD2", "ABCG1", "SSR3", "HIF1A", "CCL21", "TST", "RPS27", "RPN1", "TNPO1", "VAMP8", "SEC61A1", "TESC", "SDCBP", "DCLK1", "GGA1", "BCL2L1", "KPNA2", "TUBA1B", "UNC93B1", "BCL3", "TUBB", "SRPRB", "PICALM", "SPCS3", "ACACB", "NGFR", "RAB8B", "CLTC", "CBLB", "SCAMP2", "RPLP0", "SLC25A13", "RPS19", "HTATIP2", "EIF5A", "DERL1", "AKR1C3"…
19	CELLULAR MACROMOLECULE LOCALIZATION%GO%GO:0070727	5.87366e-24	1.02078e-21	1.27091	0.398935	2.80584	320	c("BMP7", "FGF7", "HEY2", "BCL6", "SRGN", "STAT3", "NKD2", "SSR3", "RPS27", "RPN1", "EPB41L3", "TNPO1", "SEC61A1", "PTPRU", "MYO5A", "TESC", "RAMP1", "AXIN2", "SDCBP", "GGA1", "KPNA2", "CD4", "UNC93B1", "BCL3", "IL10", "SRPRB", "SPCS3", "NGFR", "RAB8B", "CLTC", "CBLB", "WNT5A", "RPLP0", "FERMT2", "BID", "RPS19", "EIF5A", "DERL1", "MUSK", "AKR1C3", "CD63", "FBLN5", "RPN2", "CD74", "RPL34", "LMNA",…
20	REGULATION OF PHOSPHATE METABOLIC PROCESS%GO%GO:0019220	1.01833e-23	1.68126e-21	1.26274	0.35007	2.53888	496	c("CCL2", "MYH6", "C3", "BMP7", "BLM", "SOCS3", "CCL11", "FPR1", "FGF7", "ATF3", "FGD2", "PDGFRA", "NCKAP1L", "TSPYL2", "TGFA", "SLC11A1", "PIM1", "WNK3", "LRP8", "CDKN1A", "SAMSN1", "CSF1R", "HCLS1", "TLR4", "PLEK", "DDIT4", "PLSCR1", "ADCY3", "ACVRL1", "EDN1", "MYL4", "MAP3K6", "IL6R", "CCL21", "IRAK1", "THBS1", "PRKAR2A", "TGFBR2", "PRKCD", "ITGA5", "ATF4", "DUSP2", "SOCS1", "GABBR2", "NOD2", …
21	EXTRACELLULAR REGION%GO%GO:0005576	1.14449e-23	1.79957e-21	1.26274	0.357902	2.57957	458	c("FCN3", "CD163", "AZGP1", "CCL2", "C3", "BMP7", "LMCD1", "QSOX1", "APOB", "CCL11", "FGF7", "SERPINA3", "PLA2G2A", "S100A9", "CFD", "SPOCK1", "F13A1", "F5", "FGF12", "ENO1", "TGFA", "TIMP4", "CTSB", "ANGPTL4", "ADAMTS9", "C1R", "S100A8", "SRGN", "TFPI", "CEL", "F8", "PLEK", "PVR", "HMOX1", "EMILIN1", "C1QC", "PLAU", "EFEMP1", "TGFBR3", "EDN1", "SERPINA1", "SMPDL3A", "TCN2", "IL6R", "TFRC", "P4HB…
22	INTEGRAL TO PLASMA MEMBRANE%GO%GO:0005887	1.86559e-23	2.80008e-21	1.25451	0.348006	2.52033	484	c("CORIN", "CD163", "ATP2A2", "S1PR3", "SLC1A5", "KCNIP2", "KCNK1", "OSMR", "MPP3", "ATP1A1", "PDGFRA", "SLC5A1", "NCKAP1L", "LRRC32", "ANPEP", "PDPN", "SLC11A1", "LYVE1", "TYROBP", "CCR1", "HAS2", "CSF1R", "IL1R1", "TLR4", "CD58", "EBP", "PLSCR1", "ADCY3", "CYBB", "IL17RA", "ACVRL1", "TGFBR3", "TLR2", "MARCO", "ABCG1", "C3AR1", "AQP9", "IL6R", "KCNJ8", "CYBA", "SCARA5", "TFRC", "IRAK1", "SLC7A8"…
23	POSITIVE REGULATION OF CATALYTIC ACTIVITY%GO%GO:0043085	2.04671e-23	2.93836e-21	1.25451	0.356869	2.57256	456	c("CCL2", "CCL11", "FPR1", "ATF3", "S100A9", "MID1IP1", "PDGFRA", "NCKAP1L", "TSPYL2", "TGFA", "SLC11A1", "PIM1", "S100A8", "PPARG", "LRP8", "MYC", "CSF1R", "TLR4", "PLEK", "PLSCR1", "ADCY3", "EDN1", "POR", "MYL4", "XRCC4", "MAP3K6", "HIF1A", "CCL21", "IRAK1", "THBS1", "PRKAR2A", "TGFBR2", "PRKCD", "ATF4", "SELE", "NOD2", "NGF", "DDX3X", "CXCL1", "AGTR1", "PREX1", "AXIN2", "TBC1D2", "GADD45B", "P…
24	REGULATION OF IMMUNE RESPONSE%GO%GO:0050776	2.77119e-23	3.8127e-21	1.24623	0.421046	2.91696	260	c("FCN3", "C3", "SOCS3", "BIRC3", "CFD", "SYK", "WAS", "NCKAP1L", "CD38", "SLC11A1", "C1R", "BCL6", "TYROBP", "PPARG", "SAMSN1", "TLR4", "PVR", "C1QC", "PLSCR1", "TLR2", "BTK", "CD86", "MARCO", "SAMHD1", "IRAK1", "STXBP2", "SOCS1", "C1S", "NOD2", "HLA-DRA", "C7", "HCST", "ICAM3", "LY96", "C1QA", "IRF1", "CD276", "C1QB", "FGR", "C5AR1", "CD4", "B2M", "UNC93B1", "IL10", "TYRO3", "TLR8", "RPS6KA2", …
25	INTRACELLULAR SIGNAL TRANSDUCTION%GO%GO:0035556	3.20588e-23	4.23433e-21	1.24623	0.345024	2.50126	493	c("CCL2", "SOCS3", "FPR1", "BIRC3", "EIF4EBP1", "FGD2", "PDGFRA", "FGF12", "NUDT4", "TGFA", "CD209", "WNK3", "TYROBP", "MYC", "STAT3", "CDKN1A", "CSF1R", "HCLS1", "TLR4", "PLEK", "RHOD", "HMOX1", "DDIT4", "TGFBR3", "EDN1", "TLR2", "BTK", "MAP3K6", "IRAK1", "PRKAR2A", "ATF4", "SOCS1", "TEAD2", "SELE", "NOD2", "NGF", "DDX3X", "CXCL1", "AGTR1", "PREX1", "LY96", "SDCBP", "CDK2", "RGS19", "PSME2", "TN…
26	EGFR1%NETPATH%EGFR1	1.29505e-22	1.64471e-20	1.2295	0.409843	2.85127	278	c("GRB14", "SOCS3", "LDHA", "EIF4EBP1", "ATP1A1", "ENO1", "MYC", "STAT3", "REPS2", "S100A10", "TNS1", "PLSCR1", "CD59", "NEDD9", "SLC38A2", "TFRC", "TGIF1", "TKT", "PIK3R3", "PRKCD", "SOCS1", "ANXA2", "ALDOA", "EIF4G1", "CALCOCO2", "DAB2", "DDX3X", "DUSP1", "SDCBP", "CDK2", "GIT2", "WNK1", "MVP", "AXL", "MARVELD2", "BCAR3", "RPS6KA2", "CLTC", "CBLB", "SH3KBP1", "GRB2", "RPLP0", "EPN1", "ITGA3", "…
27	POSITIVE REGULATION OF PROTEIN METABOLIC PROCESS%GO%GO:0051247	1.89703e-22	2.23714e-20	1.2295	0.362128	2.59229	414	c("CCL2", "C3", "BMP7", "FPR1", "FGF7", "ATF3", "NCKAP1L", "TSPYL2", "TGFA", "SLC11A1", "PIM1", "WNK3", "LRP8", "CSF1R", "HCLS1", "TLR4", "HMOX1", "NKD2", "ADCY3", "ACVRL1", "EDN1", "CD86", "MAP3K6", "IL6R", "CCL21", "IRAK1", "THBS1", "PRKAR2A", "TGFBR2", "PRKCD", "ITGA5", "ATF4", "NOD2", "NGF", "DAB2", "DDX3X", "AGTR1", "PPP2R5A", "RAMP1", "EBI3", "AXIN2", "CD44", "GADD45B", "PSME2", "CD276", "T…
28	REGULATION OF RESPONSE TO STRESS%GO%GO:0080134	1.89703e-22	2.23714e-20	1.2295	0.38526	2.72915	344	c("C3", "BMP7", "SOCS3", "PLA2G2A", "S100A9", "BIRC3", "OSMR", "SYK", "DOCK2", "PDGFRA", "S100A8", "PPARG", "MYC", "TLR4", "PLEK", "PVR", "PLSCR1", "PLAU", "EDN1", "TLR2", "BTK", "MARCO", "SAMHD1", "MAP3K6", "CCL21", "IRAK1", "THBS1", "PRKCD", "SOCS1", "SELE", "NOD2", "AGTR1", "SERPINE1", "LY96", "AXIN2", "CD44", "SDCBP", "PTGIS", "IRF1", "FGR", "CD4", "B2M", "LTBR", "TNFRSF1A", "UNC93B1", "CDK6"…
29	POSITIVE REGULATION OF CELLULAR PROTEIN METABOLIC PROCESS%GO%GO:0032270	2.33819e-22	2.66231e-20	1.22105	0.367069	2.61906	384	c("CCL2", "C3", "BMP7", "FPR1", "FGF7", "ATF3", "NCKAP1L", "TSPYL2", "TGFA", "SLC11A1", "PIM1", "WNK3", "LRP8", "CSF1R", "HCLS1", "TLR4", "NKD2", "ADCY3", "ACVRL1", "EDN1", "MAP3K6", "IL6R", "CCL21", "IRAK1", "THBS1", "PRKAR2A", "TGFBR2", "PRKCD", "ITGA5", "ATF4", "NOD2", "NGF", "DAB2", "DDX3X", "AGTR1", "PPP2R5A", "RAMP1", "AXIN2", "CD44", "GADD45B", "PSME2", "TNFRSF10A", "ASNS", "C5AR1", "CD4",…
30	POSITIVE REGULATION OF IMMUNE SYSTEM PROCESS%GO%GO:0002684	5.17237e-22	5.69306e-20	1.21254	0.4269	2.9375	240	c("FCN3", "CCL2", "C3", "CFD", "SYK", "WAS", "NCKAP1L", "CD38", "SLC11A1", "MAP3K8", "C1R", "CCR1", "TLR4", "PVR", "C1QC", "PLSCR1", "TLR2", "BTK", "CD86", "MARCO", "MOG", "IL6R", "CCL21", "IRAK1", "THBS1", "TGFBR2", "STXBP2", "PIK3R3", "C1S", "NOD2", "HLA-DRA", "C7", "SERPINE1", "LY96", "EBI3", "C1QA", "CD276", "C1QB", "FGR", "C5AR1", "CD4", "AXL", "UNC93B1", "TLR8", "RPS6KA2", "WNT5A", "GRB2", …
31	INTRINSIC TO PLASMA MEMBRANE%GO%GO:0031226	5.34971e-22	5.6983e-20	1.21254	0.34498	2.5024	499	c("CORIN", "CD163", "ATP2A2", "S1PR3", "SLC1A5", "KCNIP2", "KCNK1", "OSMR", "MPP3", "ATP1A1", "PDGFRA", "SLC5A1", "NCKAP1L", "GGT5", "LRRC32", "ANPEP", "PDPN", "SLC11A1", "LYVE1", "TYROBP", "CCR1", "HAS2", "CSF1R", "IL1R1", "TLR4", "CD58", "EBP", "PLSCR1", "ADCY3", "CYBB", "IL17RA", "ACVRL1", "TGFBR3", "TLR2", "CD59", "MARCO", "ABCG1", "C3AR1", "AQP9", "IL6R", "KCNJ8", "CYBA", "SCARA5", "TFRC", "…
32	INTRACELLULAR PROTEIN TRANSPORT%GO%GO:0006886	7.18802e-22	7.31125e-20	1.21254	0.436697	2.99278	225	c("BCL6", "STAT3", "NKD2", "SSR3", "RPS27", "RPN1", "TNPO1", "SEC61A1", "TESC", "SDCBP", "GGA1", "KPNA2", "UNC93B1", "BCL3", "SRPRB", "SPCS3", "NGFR", "RAB8B", "CLTC", "CBLB", "RPLP0", "RPS19", "EIF5A", "DERL1", "AKR1C3", "RPN2", "CD74", "RPL34", "RPGR", "TAP1", "RPL27A", "RPS5", "PDE2A", "RPL29", "RPL18", "RPS18", "SURF4", "SEC11C", "EHD1", "NCF1", "SPCS2", "YWHAH", "RPL24", "RPL13", "TMED9", "S…
33	ADAPTIVE IMMUNE SYSTEM%REACTOME%REACT_75774.4	7.30682e-22	7.31125e-20	1.21254	0.383654	2.70583	327	c("C3", "CTSC", "SOCS3", "FGF7", "IFI30", "SYK", "WAS", "PDGFRA", "CTSB", "MAP3K8", "LILRB5", "TYROBP", "CDKN1A", "PVR", "CYBB", "BTK", "CD86", "CYBA", "HLA-DMA", "PIK3R3", "SOCS1", "RNF144B", "HLA-DRA", "HLA-DMB", "SEC61A1", "CTSS", "PPP2R5A", "HCST", "ICAM3", "PSME2", "CD4", "B2M", "RNF41", "PSMD8", "ZBTB16", "CBLB", "RAP1GAP", "RNF19B", "ITGB2", "SH3KBP1", "UBE2F", "FCGR2B", "LILRB2", "IFITM1"…
34	EGFR1%IOB%EGFR1	9.32656e-22	9.05773e-20	1.20398	0.405844	2.81683	273	c("GRB14", "SOCS3", "LDHA", "EIF4EBP1", "ATP1A1", "ENO1", "MYC", "STAT3", "REPS2", "S100A10", "TNS1", "PLSCR1", "CD59", "NEDD9", "SLC38A2", "TFRC", "TGIF1", "TKT", "PIK3R3", "PRKCD", "SOCS1", "ANXA2", "ALDOA", "EIF4G1", "CALCOCO2", "DAB2", "DDX3X", "DUSP1", "SDCBP", "CDK2", "GIT2", "WNK1", "MVP", "AXL", "MARVELD2", "BCAR3", "RPS6KA2", "CLTC", "CBLB", "SH3KBP1", "GRB2", "RPLP0", "EPN1", "ITGA3", "…
35	REGULATION OF DEFENSE RESPONSE%GO%GO:0031347	1.51634e-21	1.43056e-19	1.20398	0.437805	2.97173	212	c("C3", "SOCS3", "PLA2G2A", "S100A9", "BIRC3", "OSMR", "DOCK2", "S100A8", "PPARG", "TLR4", "PVR", "PLSCR1", "TLR2", "BTK", "MARCO", "SAMHD1", "IRAK1", "PRKCD", "SOCS1", "SELE", "NOD2", "AGTR1", "SERPINE1", "LY96", "PTGIS", "IRF1", "FGR", "CD4", "B2M", "TNFRSF1A", "UNC93B1", "TYRO3", "TLR8", "RPS6KA2", "WNT5A", "IRAK3", "CLEC7A", "HYAL2", "IFNGR1", "RPS19", "CD55", "PIK3AP1", "C2", "JAK1", "PYCARD…
36	INNATE IMMUNE RESPONSE%GO%GO:0045087	2.16107e-21	1.98218e-19	1.19534	0.423945	2.91267	236	c("FCN3", "CCL2", "C3", "SOCS3", "IFI30", "CFD", "SYK", "CTSB", "SLC11A1", "IRF8", "C1R", "ISG20", "PPARG", "TLR4", "C1QC", "CYBB", "TLR2", "BTK", "AQP4", "CYBA", "IRAK1", "IFITM2", "PRKCD", "SOCS1", "C1S", "NOD2", "HLA-DRA", "CALCOCO2", "DDX3X", "CTSS", "C7", "LY96", "C1QA", "CD44", "IRF1", "C1QB", "BCL2L1", "CD4", "B2M", "UNC93B1", "TUBB", "TLR8", "RPS6KA2", "WNT5A", "AIF1", "IFI27", "CORO1A", …
37	VESICLE%GO%GO:0031982	2.90367e-21	2.59133e-19	1.19534	0.390549	2.73192	308	c("C3", "APOB", "CFD", "F13A1", "SYK", "F5", "ENO1", "TGFA", "SLC11A1", "SRGN", "F8", "EMILIN1", "NKD2", "CYBB", "SERPINA1", "CYBA", "TFRC", "THBS1", "STXBP2", "NOD2", "VAMP8", "HLA-DRA", "ANXA2", "ALDOA", "MCFD2", "MYO5A", "SERPINE1", "AXIN2", "TBC1D2", "CPA3", "TMED3", "SDCBP", "TGFBI", "GCHFR", "B2M", "MVP", "UNC93B1", "TUBB", "NOSTRIN", "SYT13", "PICALM", "RAB8B", "CLTC", "SLC11A2", "TIMP1", …
38	MEMBRANE-BOUNDED VESICLE%GO%GO:0031988	3.81555e-21	3.31551e-19	1.18665	0.400802	2.7896	281	c("C3", "APOB", "CFD", "F13A1", "SYK", "F5", "ENO1", "SLC11A1", "SRGN", "F8", "EMILIN1", "CYBB", "SERPINA1", "CYBA", "TFRC", "THBS1", "STXBP2", "VAMP8", "HLA-DRA", "ANXA2", "ALDOA", "MCFD2", "MYO5A", "SERPINE1", "AXIN2", "CPA3", "TMED3", "SDCBP", "TGFBI", "GCHFR", "B2M", "MVP", "UNC93B1", "TUBB", "NOSTRIN", "SYT13", "PICALM", "RAB8B", "CLTC", "TIMP1", "ECE2", "ACTG1", "CORO1A", "ANXA3", "HYAL2", …
39	REGULATION OF PHOSPHORYLATION%GO%GO:0042325	5.93248e-21	5.02284e-19	1.18665	0.365199	2.59708	366	c("CCL2", "C3", "BMP7", "BLM", "SOCS3", "FPR1", "FGF7", "ATF3", "PDGFRA", "NCKAP1L", "TSPYL2", "TGFA", "SLC11A1", "PIM1", "WNK3", "LRP8", "CDKN1A", "SAMSN1", "CSF1R", "HCLS1", "TLR4", "DDIT4", "ADCY3", "ACVRL1", "EDN1", "MAP3K6", "IL6R", "CCL21", "IRAK1", "THBS1", "PRKAR2A", "TGFBR2", "PRKCD", "ITGA5", "ATF4", "DUSP2", "SOCS1", "NOD2", "NGF", "CCNG1", "DAB2", "PPP2R5A", "DUSP1", "AXIN2", "CD44", …
40	INNATE IMMUNE SYSTEM%REACTOME%REACT_6802.4	1.65766e-20	1.3684e-18	1.16907	0.399013	2.76678	265	c("C3", "FGF7", "BIRC3", "CFD", "SYK", "WAS", "PDGFRA", "CTSB", "C1R", "TYROBP", "CDKN1A", "TLR4", "C1QC", "ADCY3", "TLR2", "BTK", "CD86", "IL6R", "IRAK1", "PRKAR2A", "PIK3R3", "PRKCD", "ITGAM", "C1S", "NOD2", "CTSS", "MYO5A", "C7", "LY86", "LY96", "C1QA", "IRF1", "C1QB", "FGR", "BCL2L1", "CD4", "B2M", "CASP4", "UNC93B1", "TLR8", "RPS6KA2", "ITGB2", "IRAK3", "ACTG1", "FCGR2A", "CD55", "C2", "PSTP…
41	REGULATION OF CELL PROLIFERATION%GO%GO:0042127	1.73521e-20	1.39748e-18	1.16907	0.353155	2.5232	394	c("AZGP1", "BMP7", "NAMPT", "CCL11", "S1PR3", "FGF7", "OSMR", "PDGFRA", "NCKAP1L", "VASH2", "CD38", "OSR1", "TGFA", "CD209", "HAS2", "PPARG", "MYC", "CDKN1A", "CSF1R", "HCLS1", "HMOX1", "ACVRL1", "TGFBR3", "EDN1", "CD86", "HIF1A", "AKR1C2", "IL6R", "THBS1", "TGFBR2", "GNL3", "TOB2", "NOD2", "PTPRU", "CXCL1", "AGTR1", "TESC", "EBI3", "AXIN2", "NME1", "SERTAD1", "CDK2", "ZNF703", "PID1", "PRKRA", "…
42	REGULATION OF BODY FLUID LEVELS%GO%GO:0050878	2.04579e-20	1.60838e-18	1.16907	0.399025	2.76609	264	c("GRB14", "ATP2A2", "APOB", "ATP1B3", "ATP1B1", "CFD", "F13A1", "SYK", "FCER1G", "F5", "WAS", "PDGFRA", "FERMT3", "SRGN", "HAS2", "LRP8", "TFPI", "CEL", "F8", "CD58", "APBB1IP", "PLEK", "PLSCR1", "PLAU", "SERPINA1", "CD59", "AQP4", "THBS1", "PRKAR2A", "SLC7A8", "PIK3R3", "PRKCD", "ITGAM", "DOCK11", "ITGA5", "ALDOA", "MAFF", "SERPINE1", "ITGA2", "CDK2", "IRF1", "WDR1", "FGR", "MERTK", "TYRO3", "G…
43	WOUND HEALING%GO%GO:0042060	3.91619e-20	3.00727e-18	1.16018	0.39633	2.75356	274	c("GRB14", "ATP2A2", "APOB", "ATP1B3", "ATP1B1", "CFD", "F13A1", "SYK", "FCER1G", "F5", "WAS", "PDGFRA", "FERMT3", "SLC11A1", "SRGN", "LRP8", "TFPI", "F8", "CD58", "APBB1IP", "PLEK", "HMOX1", "PLSCR1", "PLAU", "ACVRL1", "SERPINA1", "CD59", "HIF1A", "THBS1", "PRKAR2A", "SLC7A8", "PIK3R3", "PRKCD", "ITGAM", "DOCK11", "ITGA5", "ALDOA", "MAFF", "SERPINE1", "ITGA2", "CDK2", "IRF1", "WDR1", "FGR", "MER…
44	ANION BINDING%GO%GO:0043168	1.09401e-19	8.21007e-18	1.14219	0.387645	2.70159	288	c("BLM", "APOB", "TUBA3D", "S100A9", "HK3", "FGF12", "GNMT", "CBS", "PIM1", "WNK3", "S100A8", "PDE4D", "PPARG", "CEL", "PLEK", "CYBB", "ACVRL1", "TGFBR3", "BTK", "SHMT1", "ABCG1", "MAP3K6", "AKR1C2", "THBS1", "GALK1", "GNL3", "SELE", "FABP5", "ALOX5AP", "NME1", "WNK1", "RUNX3", "STK17B", "AXL", "CDK6", "PAPOLA", "PICALM", "RAB8B", "GNA15", "SPHK1", "P2RX5", "PMVK", "PDK4", "IRAK3", "FERMT2", "SNX…
45	POSITIVE REGULATION OF PROTEIN MODIFICATION PROCESS%GO%GO:0031401	1.31439e-19	9.64468e-18	1.14219	0.367307	2.59934	341	c("CCL2", "C3", "BMP7", "FPR1", "FGF7", "ATF3", "NCKAP1L", "TSPYL2", "TGFA", "SLC11A1", "PIM1", "WNK3", "LRP8", "CSF1R", "HCLS1", "TLR4", "ADCY3", "ACVRL1", "EDN1", "MAP3K6", "IL6R", "CCL21", "IRAK1", "THBS1", "PRKAR2A", "TGFBR2", "PRKCD", "ITGA5", "ATF4", "NOD2", "NGF", "DAB2", "PPP2R5A", "RAMP1", "AXIN2", "CD44", "GADD45B", "PSME2", "TNFRSF10A", "ASNS", "C5AR1", "CD4", "PSMD8", "TNFRSF1A", "SRP…
46	EXTRACELLULAR REGION PART%GO%GO:0044421	1.53476e-19	1.10169e-17	1.14219	0.382985	2.66708	286	c("C3", "BMP7", "LMCD1", "QSOX1", "APOB", "PLA2G2A", "SPOCK1", "FGF12", "ENO1", "TGFA", "CTSB", "ANGPTL4", "ADAMTS9", "SRGN", "TFPI", "CEL", "PVR", "HMOX1", "EMILIN1", "PLAU", "EFEMP1", "TGFBR3", "EDN1", "SERPINA1", "TCN2", "IL6R", "THBS1", "GPX3", "SELE", "ANXA2", "ALDOA", "FBN2", "SERPINE1", "C1QA", "SDCBP", "TGFBI", "PTGIS", "C1QB", "MERTK", "MVP", "AXL", "TNFRSF1A", "LYZ", "SPP1", "TUBB", "FG…
47	BLOOD COAGULATION%GO%GO:0007596	1.97737e-19	1.36027e-17	1.14219	0.403419	2.78297	249	c("GRB14", "ATP2A2", "APOB", "ATP1B3", "ATP1B1", "CFD", "F13A1", "SYK", "FCER1G", "F5", "WAS", "PDGFRA", "FERMT3", "SRGN", "LRP8", "TFPI", "F8", "CD58", "APBB1IP", "PLEK", "PLSCR1", "PLAU", "SERPINA1", "CD59", "THBS1", "PRKAR2A", "SLC7A8", "PIK3R3", "PRKCD", "ITGAM", "DOCK11", "ITGA5", "ALDOA", "MAFF", "SERPINE1", "ITGA2", "CDK2", "IRF1", "WDR1", "FGR", "MERTK", "TYRO3", "GNA15", "TIMP1", "ITGB2"…
48	COAGULATION%GO%GO:0050817	1.97737e-19	1.36027e-17	1.14219	0.403419	2.78297	249	c("GRB14", "ATP2A2", "APOB", "ATP1B3", "ATP1B1", "CFD", "F13A1", "SYK", "FCER1G", "F5", "WAS", "PDGFRA", "FERMT3", "SRGN", "LRP8", "TFPI", "F8", "CD58", "APBB1IP", "PLEK", "PLSCR1", "PLAU", "SERPINA1", "CD59", "THBS1", "PRKAR2A", "SLC7A8", "PIK3R3", "PRKCD", "ITGAM", "DOCK11", "ITGA5", "ALDOA", "MAFF", "SERPINE1", "ITGA2", "CDK2", "IRF1", "WDR1", "FGR", "MERTK", "TYRO3", "GNA15", "TIMP1", "ITGB2"…
49	CARBOHYDRATE DERIVATIVE METABOLIC PROCESS%GO%GO:1901135	2.32538e-19	1.56702e-17	1.13309	0.344649	2.46424	407	c("MYH6", "HK2", "LPCAT3", "GFPT2", "BLM", "PLA2G2A", "HK3", "PTDSS1", "NGLY1", "CHST7", "GNMT", "ADAMTS9", "LYVE1", "ALG3", "PDE4D", "NANS", "HAS2", "CHST9", "UAP1", "APOBEC2", "RHOD", "MPDU1", "PLSCR1", "ADA", "HIF1A", "AKR1C2", "G6PD", "TKT", "GNL3", "RPN1", "ALDOA", "MCFD2", "DDX3X", "PAPSS2", "GLA", "MAGT1", "EIF5", "CD44", "CHSY1", "ST3GAL1", "EDEM2", "TK1", "GNPNAT1", "LPCAT4", "B4GALT6", …
50	HEMOSTASIS%GO%GO:0007599	3.40199e-19	2.24667e-17	1.13309	0.400761	2.76632	250	c("GRB14", "ATP2A2", "APOB", "ATP1B3", "ATP1B1", "CFD", "F13A1", "SYK", "FCER1G", "F5", "WAS", "PDGFRA", "FERMT3", "SRGN", "LRP8", "TFPI", "F8", "CD58", "APBB1IP", "PLEK", "PLSCR1", "PLAU", "SERPINA1", "CD59", "THBS1", "PRKAR2A", "SLC7A8", "PIK3R3", "PRKCD", "ITGAM", "DOCK11", "ITGA5", "ALDOA", "MAFF", "SERPINE1", "ITGA2", "CDK2", "IRF1", "WDR1", "FGR", "MERTK", "TYRO3", "GNA15", "TIMP1", "ITGB2"…
51	REGULATION OF APOPTOTIC PROCESS%GO%GO:0042981	5.11884e-19	3.3142e-17	1.12391	0.327765	2.37423	487	c("CCL2", "BMP7", "SOCS3", "S100A9", "BIRC3", "FAIM2", "NCKAP1L", "CD38", "OSR1", "CTSB", "PIM1", "ANGPTL4", "TNFAIP8", "WNK3", "S100A8", "BCL6", "PPARG", "MYC", "CDKN1A", "HCLS1", "HMOX1", "GRK5", "DDIT4", "TLR2", "BTK", "IL6R", "CCL21", "THBS1", "PRKCD", "ITGA5", "ATF4", "DUSP2", "NOD2", "DCUN1D3", "GAS1", "DAB2", "DDX3X", "DUSP1", "SERPINE1", "CD44", "NME1", "PTGIS", "PSME2", "IRF1", "TNFRSF10…
52	ENZYME LINKED RECEPTOR PROTEIN SIGNALING PATHWAY%GO%GO:0007167	5.24601e-19	3.33122e-17	1.12391	0.369316	2.59752	320	c("BMP7", "NAMPT", "SOCS3", "FGF7", "EIF4EBP1", "FGD2", "PDGFRA", "FGF12", "MYC", "STAT3", "REPS2", "CSF1R", "DDIT4", "ADCY3", "EFEMP1", "ACVRL1", "TGFBR3", "TGIF1", "IRAK1", "PRKAR2A", "TGFBR2", "PRKCD", "E2F5", "SOCS1", "NGF", "EIF4G1", "PTPRU", "SERPINE1", "PTPRG", "PREX1", "CD4", "MVP", "FSTL1", "NGFR", "RPS6KA2", "CLTC", "PPP1CC", "PDK4", "SH3KBP1", "GRB2", "EPN1", "ANGPT2", "DGKD", "MUSK", …
53	REGULATION OF PROTEIN PHOSPHORYLATION%GO%GO:0001932	5.75471e-19	3.55778e-17	1.12391	0.362289	2.57301	352	c("CCL2", "C3", "BMP7", "BLM", "SOCS3", "FPR1", "FGF7", "ATF3", "NCKAP1L", "TSPYL2", "TGFA", "SLC11A1", "PIM1", "WNK3", "LRP8", "CDKN1A", "SAMSN1", "CSF1R", "HCLS1", "TLR4", "DDIT4", "ADCY3", "ACVRL1", "EDN1", "MAP3K6", "IL6R", "CCL21", "IRAK1", "THBS1", "PRKAR2A", "TGFBR2", "PRKCD", "ITGA5", "ATF4", "DUSP2", "SOCS1", "NOD2", "NGF", "CCNG1", "DAB2", "DUSP1", "AXIN2", "CD44", "GADD45B", "SERTAD1",…
54	REGULATION OF CELL DEATH%GO%GO:0010941	5.8183e-19	3.55778e-17	1.12391	0.328872	2.38556	499	c("CCL2", "BMP7", "SOCS3", "S100A9", "BIRC3", "FAIM2", "NCKAP1L", "CD38", "OSR1", "CTSB", "PIM1", "ANGPTL4", "TNFAIP8", "WNK3", "S100A8", "BCL6", "PPARG", "MYC", "CDKN1A", "HCLS1", "HMOX1", "GRK5", "DDIT4", "TLR2", "BTK", "IL6R", "CCL21", "THBS1", "PRKCD", "ITGA5", "ATF4", "DUSP2", "NOD2", "DCUN1D3", "GAS1", "DAB2", "DDX3X", "DUSP1", "SERPINE1", "AXIN2", "CD44", "NME1", "PTGIS", "PSME2", "IRF1", …
55	CELLULAR NITROGEN COMPOUND BIOSYNTHETIC PROCESS%GO%GO:0044271	7.60438e-19	4.5654e-17	1.12391	0.330018	2.37963	464	c("ARG2", "GFPT2", "AMD1", "CEBPD", "NQO1", "ZBTB7B", "PPARG", "MYC", "UAP1", "TSC22D1", "SHMT1", "ADA", "HIF1A", "ASS1", "TGIF1", "RPS27", "ATF4", "E2F5", "NR4A2", "TEAD2", "ALDOA", "ALOX5AP", "PAPSS2", "MAFF", "RORB", "SERPINE1", "NR4A3", "SAT1", "ESRRG", "GCHFR", "IRF1", "FOSL1", "ASNS", "C5AR1", "SNRPB", "RUNX3", "TK1", "GNPNAT1", "BCL3", "PAPOLA", "CNDP2", "SGMS2", "HSF2", "GCLM", "ETV7", "R…
56	REGULATION OF PROGRAMMED CELL DEATH%GO%GO:0043067	9.90482e-19	5.84031e-17	1.11466	0.328542	2.38047	488	c("CCL2", "BMP7", "SOCS3", "S100A9", "BIRC3", "FAIM2", "NCKAP1L", "CD38", "OSR1", "CTSB", "PIM1", "ANGPTL4", "TNFAIP8", "WNK3", "S100A8", "BCL6", "PPARG", "MYC", "CDKN1A", "HCLS1", "HMOX1", "GRK5", "DDIT4", "TLR2", "BTK", "IL6R", "CCL21", "THBS1", "PRKCD", "ITGA5", "ATF4", "DUSP2", "NOD2", "DCUN1D3", "GAS1", "DAB2", "DDX3X", "DUSP1", "SERPINE1", "CD44", "NME1", "PTGIS", "PSME2", "IRF1", "TNFRSF10…
57	MACROMOLECULAR COMPLEX SUBUNIT ORGANIZATION%GO%GO:0043933	2.11918e-18	1.22764e-16	1.10534	0.330739	2.38046	448	c("MGST1", "BLM", "APOB", "PLA2G2A", "MID1IP1", "WAS", "NCKAP1L", "GNMT", "FERMT3", "AASS", "REPS2", "HMOX1", "SHMT1", "ABCG1", "NEDD9", "SKAP2", "CYBA", "SCARA5", "IRAK1", "RPS27", "SMARCD2", "GPX3", "NOD2", "ALDOA", "ALOX5AP", "DDX3X", "TUBG1", "AGTR1", "PREX1", "CCT2", "SNRPB", "TK1", "TMEM70", "PICALM", "ACACB", "AIF1", "RPLP0", "DDX23", "PHACTR1", "FERMT2", "SOD2", "DGKD", "RPS19", "ADD1", "…
58	CYTOPLASMIC VESICLE%GO%GO:0031410	2.58154e-18	1.4697e-16	1.10534	0.382425	2.65274	269	c("APOB", "CFD", "F13A1", "SYK", "F5", "TGFA", "SLC11A1", "SRGN", "F8", "NKD2", "CYBB", "SERPINA1", "CYBA", "TFRC", "THBS1", "STXBP2", "VAMP8", "HLA-DRA", "ALDOA", "MCFD2", "MYO5A", "SERPINE1", "AXIN2", "TBC1D2", "CPA3", "TMED3", "GCHFR", "B2M", "UNC93B1", "NOSTRIN", "SYT13", "PICALM", "RAB8B", "CLTC", "SLC11A2", "TIMP1", "ECE2", "CORO1A", "ANXA3", "HYAL2", "ARHGDIB", "DGKD", "CRISPLD2", "FES", "…
59	VESICLE-MEDIATED TRANSPORT%GO%GO:0016192	3.1235e-18	1.7481e-16	1.10534	0.37904	2.63898	285	c("APOB", "HOOK1", "CFD", "F13A1", "SYK", "F5", "DOCK2", "TGM2", "SLC11A1", "SRGN", "CCR1", "LRP8", "F8", "PLEK", "NKD2", "SERPINA1", "SCARA5", "THBS1", "STXBP2", "MSR1", "STAB1", "VAMP8", "ALDOA", "MYO5A", "RAMP1", "SERPINE1", "WDR1", "FCGRT", "MERTK", "AXL", "PICALM", "TYRO3", "CLTC", "TIMP1", "SCAMP2", "GRB2", "AIF1", "CORO1C", "CLEC7A", "CORO1A", "ANXA3", "NCALD", "PSAP", "DNER", "CD63", "CAP…
60	MACROMOLECULE CATABOLIC PROCESS%GO%GO:0009057	5.75902e-18	3.16938e-16	1.09593	0.353226	2.49862	340	c("BLM", "NGLY1", "ADAMTS9", "LYVE1", "RNASE6", "ISG20", "RPS27", "RNF144B", "EIF4G1", "CD44", "CDK2", "PSME2", "HECTD1", "PSMD8", "TPRKB", "HSPA1B", "UHRF1", "CSPG4", "EIF4A1", "RPLP0", "HYAL2", "DNAJB9", "RPS19", "ZFP36", "PSMB8", "DERL1", "AURKA", "RNASE2", "UCHL3", "EXOSC4", "ENPEP", "RPL34", "UBE2D3", "TNKS1BP1", "RPL27A", "RPS5", "RPL29", "PYGL", "RPL18", "RPS18", "SLC9A1", "RPL24", "RPL13"…
61	PROTEIN COMPLEX SUBUNIT ORGANIZATION%GO%GO:0071822	1.11578e-17	6.03986e-16	1.08644	0.35056	2.4897	351	c("MGST1", "BLM", "MID1IP1", "WAS", "NCKAP1L", "GNMT", "FERMT3", "AASS", "REPS2", "HMOX1", "SHMT1", "NEDD9", "SKAP2", "CYBA", "SCARA5", "IRAK1", "RPS27", "GPX3", "NOD2", "ALDOA", "ALOX5AP", "TUBG1", "PREX1", "CCT2", "TK1", "TMEM70", "PICALM", "ACACB", "AIF1", "RPLP0", "PHACTR1", "FERMT2", "SOD2", "DGKD", "RPS19", "ADD1", "AURKA", "EPS8", "PAWR", "SH3GLB1", "AKR1C3", "CDC42EP2", "CD74", "BBS12", "…
62	CELLULAR COMPONENT MOVEMENT%GO%GO:0006928	1.24091e-17	6.60886e-16	1.08644	0.355441	2.51309	337	c("CCL2", "MYH6", "GRB14", "APOB", "CCL11", "FPR1", "ATP1B3", "ATP1B1", "S100A9", "SPOCK1", "SYK", "FCER1G", "PDGFRA", "NCKAP1L", "LYVE1", "S100A8", "CCR1", "STAT3", "CD58", "DDIT4", "ACVRL1", "TGFBR3", "EDN1", "MYL4", "HIF1A", "IL6R", "CCL21", "THBS1", "SLC7A8", "ITGAM", "ITGA5", "SPATA13", "SELE", "S100P", "FPR3", "MYO5A", "AGTR1", "SDCBP", "MERTK", "TUBB", "IL10", "SNAI2", "SPA17", "TYRO3", "M…
63	POSITIVE REGULATION OF IMMUNE RESPONSE%GO%GO:0050778	1.57775e-17	8.26941e-16	1.07687	0.445226	2.91099	157	c("FCN3", "C3", "CFD", "SYK", "WAS", "NCKAP1L", "CD38", "SLC11A1", "C1R", "TLR4", "PVR", "C1QC", "PLSCR1", "TLR2", "BTK", "MARCO", "IRAK1", "C1S", "NOD2", "HLA-DRA", "C7", "LY96", "C1QA", "C1QB", "C5AR1", "CD4", "UNC93B1", "TLR8", "RPS6KA2", "IRAK3", "CLEC7A", "RPS19", "PIK3AP1", "C2", "HLA-DPA1", "MALT1", "PYCARD", "MAP2K1", "TAP1", "IFI16", "RIPK2", "PTEN", "NFKBIA", "NFKBIB", "TRIM5", "ITCH", …
64	ENZYME BINDING%GO%GO:0019899	2.2845e-17	1.16053e-15	1.07687	0.328335	2.35383	424	c("MYH6", "APOB", "FGD2", "HEY2", "CBS", "PDE4D", "PPARG", "STAT3", "CDC42EP4", "HCLS1", "PLEK", "HMOX1", "GRK5", "NKD2", "PLSCR1", "ACVRL1", "SERPINA1", "HIF1A", "IL6R", "PRKAR2A", "PRKCD", "SOCS1", "SELE", "NOD2", "PPP2R5A", "SERPINE1", "PREX1", "AXIN2", "WNK1", "FGR", "BCL2L1", "KPNA2", "CD4", "LTBR", "ADAMTSL4", "MVP", "TPRKB", "HSPA1B", "NGFR", "CSPG4", "SPHK1", "RAP1GAP", "PPP1CC", "GCLM", …
65	HEMOSTASIS%REACTOME%REACT_604.4	2.2845e-17	1.16053e-15	1.07687	0.387932	2.673	245	c("GRB14", "ATP2A2", "APOB", "ATP1B3", "ATP1B1", "CFD", "F13A1", "SYK", "FCER1G", "F5", "DOCK2", "SRGN", "LRP8", "TFPI", "F8", "CD58", "APBB1IP", "PLEK", "PLAU", "SERPINA1", "THBS1", "PRKAR2A", "SLC7A8", "PIK3R3", "PRKCD", "ITGAM", "DOCK11", "ITGA5", "ALDOA", "MAFF", "PPP2R5A", "SERPINE1", "ITGA2", "CDK2", "IRF1", "WDR1", "FGR", "MERTK", "GNA15", "TIMP1", "ITGB2", "ITGA3", "ANGPT2", "DGKD", "PSAP…
66	TRANSLATION%REACTOME%REACT_1014.4	2.79868e-17	1.40019e-15	1.06721	0.484923	3.06225	122	c("EIF4EBP1", "SSR3", "RPS27", "RPN1", "EIF4G1", "SEC61A1", "EIF5", "SRPRB", "SPCS3", "EIF4A1", "RPLP0", "RPS19", "RPN2", "RPL34", "RPL27A", "RPS5", "RPL29", "RPL18", "RPS18", "SEC11C", "SPCS2", "RPL24", "RPL13", "ETF1", "SSR4", "RPS17", "RPS3", "RPL35", "SEC61B", "EIF3B", "RPS15A", "RPS2", "EIF1AX", "DDOST", "RPS28", "RPSA", "RPL41", "RPLP2", "RPL18A", "RPS10", "RPL12", "EIF3J", "RPS9", "RPL36A"…
67	ENDOPLASMIC RETICULUM PART%GO%GO:0044432	3.66774e-17	1.8076e-15	1.06721	0.353446	2.49347	330	c("LPCAT3", "MGST1", "ATP2A2", "APOB", "SGPP2", "PLA2G2A", "PTDSS1", "PLP2", "CDS1", "CYP4B1", "SREBF1", "ALG3", "HMOX1", "EBP", "MPDU1", "RHBDF2", "P4HB", "TBXAS1", "TMED5", "RPN1", "HLA-DRA", "SEC61A1", "MAGT1", "HM13", "PTGIS", "EDEM2", "CD4", "B2M", "RETSAT", "UNC93B1", "LPCAT4", "RRBP1", "SRPRB", "SPCS3", "TYRO3", "TLR8", "ACSL5", "SERPINH1", "PIGA", "DNAJB9", "COL5A3", "DERL1", "PLOD2", "OS…
68	REGULATION OF DEVELOPMENTAL PROCESS%GO%GO:0050793	4.50732e-17	2.1887e-15	1.06721	0.322261	2.32522	465	c("HOPX", "CCL2", "BMP7", "APOB", "CCL11", "FGF7", "PLA2G2A", "SPOCK1", "FGD2", "PDGFRA", "MEIS1", "NCKAP1L", "VASH2", "PARVB", "MAFB", "OSR1", "HEY2", "ANGPTL4", "SRGN", "CCR1", "PPARG", "LRP8", "MYC", "CSF1R", "CDC42EP4", "HCLS1", "TLR4", "HMOX1", "C1QC", "EFEMP1", "ACVRL1", "EDN1", "BTK", "CD86", "ABCG1", "HIF1A", "IL6R", "THBS1", "TGFBR2", "SMYD1", "MSR1", "STAB1", "EPB41L3", "NGF", "ALDOA", …
69	CYTOPLASMIC MEMBRANE-BOUNDED VESICLE%GO%GO:0016023	4.59156e-17	2.1973e-15	1.06721	0.38755	2.6735	249	c("APOB", "CFD", "F13A1", "SYK", "F5", "SLC11A1", "SRGN", "F8", "CYBB", "SERPINA1", "CYBA", "TFRC", "THBS1", "STXBP2", "VAMP8", "HLA-DRA", "ALDOA", "MCFD2", "MYO5A", "SERPINE1", "AXIN2", "CPA3", "TMED3", "GCHFR", "B2M", "UNC93B1", "NOSTRIN", "SYT13", "PICALM", "RAB8B", "CLTC", "TIMP1", "ECE2", "CORO1A", "ANXA3", "HYAL2", "ARHGDIB", "DGKD", "CRISPLD2", "NCALD", "LPAR1", "CD63", "CD74", "HLA-DPA1",…
70	CELL ACTIVATION%GO%GO:0001775	5.09704e-17	2.40435e-15	1.06721	0.392625	2.69911	235	c("CFD", "F13A1", "SYK", "FCER1G", "F5", "DOCK2", "PDGFRA", "FERMT3", "SLC11A1", "SRGN", "TLR4", "F8", "APBB1IP", "PLEK", "LCP1", "PLSCR1", "IL17RA", "EDN1", "BTK", "SERPINA1", "CD86", "ADA", "CCL21", "THBS1", "TGFBR2", "STXBP2", "PIK3R3", "PRKCD", "ALDOA", "SERPINE1", "PREX1", "LRRC8A", "CD276", "WDR1", "CD4", "IL10", "TYRO3", "GNA15", "TIMP1", "GRB2", "AIF1", "CLEC7A", "ANXA3", "HYAL2", "DGKD",…
71	Phagosome%KEGG%hsa04145	8.40788e-17	3.91026e-15	1.05746	0.506666	3.1173	102	c("C3", "TUBA3E", "TUBA3D", "CD209", "C1R", "TUBA1C", "TLR4", "CYBB", "TLR2", "MARCO", "CYBA", "TFRC", "HLA-DMA", "THBS1", "ITGAM", "ITGA5", "MSR1", "HLA-DRA", "HLA-DMB", "SEC61A1", "CTSS", "ITGA2", "TUBA1B", "TUBB", "ITGB2", "CLEC7A", "ACTG1", "CORO1A", "FCGR2A", "FCGR2B", "ATP6V1A", "HLA-DPA1", "TUBB2A", "TAP1", "NCF4", "ITGB1", "NCF1", "SEC61B", "TUBA1A", "FCAR", "HLA-DRB4", "TUBB6", "STX12", …
72	REGULATION OF TRANSPORT%GO%GO:0051049	9.73645e-17	4.46524e-15	1.05746	0.349901	2.46846	330	c("CORIN", "CCL2", "C3", "BMP7", "SLC2A1", "SYK", "DOCK2", "ATP1A1", "NCKAP1L", "NUDT4", "SLC11A1", "WNK3", "SRGN", "CCR1", "PPARG", "CSF1R", "HCLS1", "TLR4", "LCP1", "RHBDF2", "EDN1", "TLR2", "CCL21", "THBS1", "PRKAR2A", "STXBP2", "PRKCD", "SELE", "NOD2", "ANXA2", "GAS1", "DAB2", "AGTR1", "TESC", "SERPINE1", "AXIN2", "PID1", "FGR", "MERTK", "BCL3", "IL10", "SNAI2", "PICALM", "SPCS3", "NGFR", "ND…
73	ACTIVATION OF IMMUNE RESPONSE%GO%GO:0002253	1.04451e-16	4.7246e-15	1.05746	0.45617	2.92833	137	c("FCN3", "C3", "CFD", "SYK", "WAS", "NCKAP1L", "CD38", "C1R", "TLR4", "C1QC", "TLR2", "BTK", "MARCO", "IRAK1", "C1S", "NOD2", "HLA-DRA", "C7", "LY96", "C1QA", "C1QB", "C5AR1", "CD4", "UNC93B1", "RPS6KA2", "IRAK3", "CLEC7A", "PIK3AP1", "C2", "HLA-DPA1", "MALT1", "PYCARD", "MAP2K1", "IFI16", "RIPK2", "PTEN", "NFKBIA", "NFKBIB", "TRIM5", "ITCH", "LCP2", "HLA-DRB4", "CD14", "MNDA", "RPS6KA1", "RIPK1…
74	RECEPTOR ACTIVITY%GO%GO:0004872	1.12604e-16	5.02456e-15	1.04763	0.346825	2.4501	334	c("CD163", "S1PR3", "FPR1", "SLC1A5", "OSMR", "IL18R1", "PDGFRA", "ANPEP", "LYVE1", "IL15RA", "LILRB5", "CCR1", "PPARG", "LRP8", "STAT3", "CSF1R", "IL1R1", "TLR4", "PVR", "IL1RL1", "EBP", "IL17RA", "EFEMP1", "ACVRL1", "TGFBR3", "TLR2", "CD86", "MARCO", "C3AR1", "AKR1C2", "IL6R", "SCARA5", "TFRC", "TGFBR2", "OPN3", "SELE", "STAB1", "HLA-DRA", "GPR34", "DAB2", "PTPRU", "IGSF6", "AGTR1", "RAMP1", "P…
75	PROTEIN TARGETING%GO%GO:0006605	1.85481e-16	8.16611e-15	1.04763	0.429845	2.84898	172	c("BCL6", "STAT3", "NKD2", "SSR3", "RPS27", "RPN1", "TNPO1", "SEC61A1", "TESC", "SDCBP", "KPNA2", "BCL3", "SRPRB", "SPCS3", "RAB8B", "CBLB", "RPLP0", "RPS19", "AKR1C3", "RPN2", "RPL34", "RPL27A", "RPS5", "PDE2A", "RPL29", "RPL18", "RPS18", "SEC11C", "NCF1", "SPCS2", "RPL24", "RPL13", "SSR4", "RPS17", "RPS3", "NUP205", "RPL35", "RERE", "SEC61B", "KATNB1", "RPS15A", "IPO5", "RPS2", "DDOST", "TMED2"…
76	POSITIVE REGULATION OF SIGNALING%GO%GO:0023056	2.46739e-16	1.07202e-14	1.0377	0.341716	2.42402	348	c("C3", "BMP7", "LMCD1", "FPR1", "BIRC3", "PDGFRA", "TGFA", "ABRA", "CCR1", "STAT3", "CSF1R", "HCLS1", "TLR4", "HMOX1", "ACVRL1", "EDN1", "TLR2", "MAP3K6", "HIF1A", "MOG", "AKR1C2", "IL6R", "CCL21", "IRAK1", "THBS1", "ITGA5", "NOD2", "DAB2", "HCST", "LY86", "CD44", "SDCBP", "PTGIS", "LITAF", "FGR", "C5AR1", "LTBR", "AXL", "TNFRSF1A", "NDFIP2", "P2RX5", "EEF1E1", "WNT5A", "XBP1", "PLXNB1", "WWC1",…
77	PROTEIN TARGETING TO MEMBRANE%GO%GO:0006612	2.6823e-16	1.15026e-14	1.0377	0.497626	3.08134	107	c("NKD2", "SSR3", "RPS27", "RPN1", "TESC", "SDCBP", "SRPRB", "SPCS3", "RAB8B", "RPLP0", "RPS19", "RPN2", "RPL34", "RPL27A", "RPS5", "RPL29", "RPL18", "RPS18", "SEC11C", "NCF1", "SPCS2", "RPL24", "RPL13", "SSR4", "RPS17", "RPS3", "RPL35", "SEC61B", "RPS15A", "RPS2", "DDOST", "TMED2", "RPS28", "PARD3", "RPSA", "RPL41", "RPLP2", "RPL18A", "RPS10", "RPL12", "RPS9", "RPL36A", "SSR1", "RPS6", "RPL21", …
78	LOCOMOTION%GO%GO:0040011	3.18207e-16	1.34425e-14	1.0377	0.334899	2.39025	381	c("CCL2", "GRB14", "APOB", "CCL11", "FGF7", "ATP1B3", "ATP1B1", "S100A9", "SPOCK1", "SYK", "FCER1G", "PDGFRA", "PLP2", "NCKAP1L", "S100A8", "TYROBP", "CCR1", "CHL1", "CD58", "DDIT4", "PLAU", "ACVRL1", "TGFBR3", "EDN1", "IL6R", "CCL21", "THBS1", "SLC7A8", "ITGAM", "ITGA5", "SPATA13", "SELE", "S100P", "CXCL1", "AGTR1", "SDCBP", "ITGA2", "ABLIM3", "FOSL1", "C5AR1", "CD4", "MERTK", "IL10", "SNAI2", "…
79	TRANSMEMBRANE RECEPTOR PROTEIN TYROSINE KINASE SIGNALING PATHWAY%GO%GO:0007169	3.21611e-16	1.34425e-14	1.0377	0.379476	2.6194	250	c("NAMPT", "SOCS3", "FGF7", "EIF4EBP1", "FGD2", "PDGFRA", "FGF12", "STAT3", "REPS2", "CSF1R", "DDIT4", "ADCY3", "EFEMP1", "IRAK1", "PRKAR2A", "PRKCD", "SOCS1", "NGF", "EIF4G1", "PTPRG", "PREX1", "CD4", "MVP", "NGFR", "RPS6KA2", "CLTC", "PDK4", "SH3KBP1", "GRB2", "EPN1", "ANGPT2", "DGKD", "MUSK", "EPS8", "FGFRL1", "ATP6V1A", "MAP2K1", "TEK", "TRIO", "RIPK2", "MPZL1", "PPP2CB", "PTEN", "CAB39L", "B…
80	ANATOMICAL STRUCTURE MORPHOGENESIS%GO%GO:0009653	4.34354e-16	1.7928e-14	1.0377	0.313659	2.26167	464	c("HOPX", "CCL2", "MYH6", "BMP7", "S1PR3", "SYK", "KLHL3", "FAIM2", "PDGFRA", "OSR1", "HEY2", "PDPN", "LYVE1", "TYROBP", "MYC", "STAT3", "CHL1", "CSF1R", "HMOX1", "AGTPBP1", "ACVRL1", "TGFBR3", "PCNT", "HIF1A", "TCF21", "THBS1", "TGFBR2", "ITGA5", "DUSP2", "EPB41L3", "ANXA2", "FBN2", "RORB", "DUSP1", "RAMP1", "SERPINE1", "AXIN2", "SDCBP", "TGFBI", "ITGA2", "SAT1", "PID1", "RTN4RL1", "ABLIM3", "SN…
81	REGULATION OF HYDROLASE ACTIVITY%GO%GO:0051336	5.02755e-16	2.0495e-14	1.02767	0.338306	2.40562	359	c("CCL2", "MYH6", "CCL11", "SERPINA3", "ATF3", "S100A9", "BIRC3", "SPOCK1", "FGD2", "PDGFRA", "NCKAP1L", "TSPYL2", "ANGPTL4", "TNFAIP8", "S100A8", "PPARG", "MYC", "TFPI", "PLEK", "PLSCR1", "ADCY3", "SERPINA1", "MYL4", "CCL21", "THBS1", "PRKAR2A", "PRKCD", "ATF4", "SELE", "NGF", "DDX3X", "AGTR1", "SERPINE1", "PREX1", "AXIN2", "CD44", "TBC1D2", "RGS19", "TNFRSF10A", "WNK1", "ASNS", "C5AR1", "MTCH1"…
82	CELLULAR COMPONENT BIOGENESIS%GO%GO:0044085	5.09595e-16	2.05205e-14	1.02767	0.31306	2.2683	488	c("MGST1", "BLM", "APOB", "FGD2", "MID1IP1", "WAS", "NCKAP1L", "PARVB", "GNMT", "FERMT3", "AASS", "REPS2", "PVR", "HMOX1", "PCNT", "SHMT1", "NEDD9", "SKAP2", "CYBA", "SCARA5", "CCL21", "IRAK1", "GNL3", "GPX3", "SPATA13", "EPB41L3", "NOD2", "ALDOA", "ALOX5AP", "DDX3X", "PREX1", "CCT2", "SDCBP", "ZNF703", "SNRPB", "TK1", "TMEM70", "PICALM", "ACACB", "AIF1", "ACTG1", "CORO1A", "DDX23", "PHACTR1", "F…
83	REGULATION OF TRANSCRIPTION FROM RNA POLYMERASE II PROMOTER%GO%GO:0006357	6.39558e-16	2.54436e-14	1.02767	0.329956	2.35632	393	c("BMP7", "NAMPT", "OSR1", "HEY2", "ENO1", "SLC11A1", "IRF8", "SREBF1", "BCL6", "PPARG", "LRP8", "MYC", "STAT3", "HCLS1", "TLR4", "HMOX1", "PLSCR1", "ACVRL1", "TGFBR3", "TFE3", "EDN1", "TLR2", "HIF1A", "TCF21", "TGIF1", "ARNTL", "ATF4", "E2F5", "SMARCD2", "NRIP1", "DDX3X", "SPI1", "SERPINE1", "PID1", "LITAF", "FOSL1", "RUNX3", "TNFRSF1A", "FSTL1", "PER1", "SNAI2", "UHRF1", "HSF2", "NCOA7", "WNT5A…
84	RESPONSE TO CYTOKINE STIMULUS%GO%GO:0034097	8.0426e-16	3.16151e-14	1.02767	0.388252	2.64677	218	c("CCL2", "SOCS3", "IFI30", "OSMR", "PLP2", "SLC11A1", "IRF8", "IL15RA", "MT1X", "ISG20", "CCR1", "HAS2", "LRP8", "STAT3", "CSF1R", "IL1R1", "HCLS1", "PLSCR1", "AQP4", "HIF1A", "IL6R", "IRAK1", "IFITM2", "PRKCD", "SOCS1", "SELE", "HLA-DRA", "EIF4G1", "CALCOCO2", "EBI3", "CD44", "PTGIS", "PID1", "IRF1", "BCL2L1", "KPNA2", "B2M", "IL17RB", "AXL", "TNFRSF1A", "EIF4A1", "WNT5A", "AIF1", "IRAK3", "IFI…
85	HETEROCYCLE BIOSYNTHETIC PROCESS%GO%GO:0018130	8.59251e-16	3.33794e-14	1.02767	0.315912	2.26809	438	c("GFPT2", "CEBPD", "ZBTB7B", "PPARG", "MYC", "UAP1", "TSC22D1", "SHMT1", "ADA", "HIF1A", "TGIF1", "RPS27", "ATF4", "E2F5", "NR4A2", "TEAD2", "ALDOA", "PAPSS2", "MAFF", "RORB", "SERPINE1", "NR4A3", "ESRRG", "IRF1", "FOSL1", "C5AR1", "SNRPB", "RUNX3", "TK1", "GNPNAT1", "BCL3", "PAPOLA", "HSF2", "ETV7", "RPLP0", "SLC25A13", "MAF", "UGP2", "MSC", "RPS19", "BATF3", "PMM2", "PSAT1", "ABCB6", "PAICS", …
86	PROTEIN LOCALIZATION TO ORGANELLE%GO%GO:0033365	8.86746e-16	3.40469e-14	1.02767	0.404214	2.7126	191	c("BMP7", "BCL6", "SRGN", "STAT3", "SSR3", "RPS27", "RPN1", "TNPO1", "SEC61A1", "KPNA2", "BCL3", "SRPRB", "SPCS3", "RAB8B", "CBLB", "RPLP0", "RPS19", "AKR1C3", "RPN2", "RPL34", "LMNA", "RPL27A", "RPS5", "PDE2A", "RPL29", "ARL2BP", "RPL18", "RPS18", "SEC11C", "SPCS2", "RPL24", "RPL13", "SSR4", "RPS17", "RPS3", "NUP205", "RPL35", "RERE", "SEC61B", "RPS15A", "IPO5", "RPS2", "DDOST", "HSP90AA1", "RPS…
87	CYTOKINE SIGNALING IN IMMUNE SYSTEM%REACTOME%REACT_75790.2	1.02525e-15	3.89123e-14	1.01754	0.421782	2.78839	167	c("SOCS3", "IFI30", "SYK", "MAP3K8", "IRF8", "ISG20", "STAT3", "IL1R1", "IL6R", "IRAK1", "IFITM2", "PIK3R3", "PRKCD", "SOCS1", "NOD2", "HLA-DRA", "EIF4G1", "CD44", "IL1R2", "IRF1", "KPNA2", "B2M", "CSF2RA", "EIF4A1", "IRAK3", "IFI27", "IFNGR1", "MT2A", "IFITM1", "PSMB8", "GBP1", "HLA-DPA1", "JAK1", "IL2RA", "MAP2K1", "IFITM3", "RIPK2", "YES1", "GBP2", "NUP205", "HLA-DRB4", "HLA-E", "YWHAZ", "NUP3…
88	POSITIVE REGULATION OF CELL COMMUNICATION%GO%GO:0010647	1.14795e-15	4.30743e-14	1.01754	0.339212	2.40368	345	c("C3", "BMP7", "LMCD1", "FPR1", "BIRC3", "PDGFRA", "TGFA", "ABRA", "CCR1", "STAT3", "CSF1R", "HCLS1", "TLR4", "HMOX1", "ACVRL1", "EDN1", "TLR2", "MAP3K6", "HIF1A", "MOG", "AKR1C2", "IL6R", "CCL21", "IRAK1", "THBS1", "ITGA5", "NOD2", "DAB2", "HCST", "LY86", "CD44", "SDCBP", "PTGIS", "LITAF", "FGR", "C5AR1", "LTBR", "AXL", "TNFRSF1A", "NDFIP2", "P2RX5", "EEF1E1", "WNT5A", "XBP1", "PLXNB1", "WWC1",…
89	CELLULAR COMPONENT ASSEMBLY%GO%GO:0022607	1.23044e-15	4.56507e-14	1.01754	0.313593	2.25834	450	c("MGST1", "BLM", "APOB", "FGD2", "MID1IP1", "WAS", "NCKAP1L", "PARVB", "GNMT", "FERMT3", "AASS", "REPS2", "PVR", "HMOX1", "PCNT", "SHMT1", "NEDD9", "SKAP2", "CYBA", "SCARA5", "CCL21", "IRAK1", "GPX3", "SPATA13", "EPB41L3", "NOD2", "ALDOA", "ALOX5AP", "DDX3X", "PREX1", "CCT2", "SDCBP", "ZNF703", "SNRPB", "TK1", "TMEM70", "PICALM", "ACACB", "AIF1", "ACTG1", "CORO1A", "DDX23", "PHACTR1", "FERMT2", …
90	POSITIVE REGULATION OF SIGNAL TRANSDUCTION%GO%GO:0009967	1.31293e-15	4.81698e-14	1.01754	0.341164	2.41215	337	c("C3", "BMP7", "LMCD1", "FPR1", "BIRC3", "PDGFRA", "TGFA", "ABRA", "CCR1", "STAT3", "CSF1R", "HCLS1", "TLR4", "HMOX1", "ACVRL1", "EDN1", "TLR2", "MAP3K6", "HIF1A", "MOG", "AKR1C2", "IL6R", "CCL21", "IRAK1", "THBS1", "ITGA5", "NOD2", "DAB2", "HCST", "LY86", "CD44", "SDCBP", "PTGIS", "LITAF", "FGR", "C5AR1", "LTBR", "AXL", "TNFRSF1A", "NDFIP2", "P2RX5", "EEF1E1", "WNT5A", "XBP1", "PLXNB1", "WWC1",…
91	ENDOPLASMIC RETICULUM MEMBRANE%GO%GO:0005789	1.35417e-15	4.9137e-14	1.01754	0.364549	2.52781	265	c("LPCAT3", "MGST1", "ATP2A2", "APOB", "SGPP2", "PLA2G2A", "PTDSS1", "PLP2", "CDS1", "CYP4B1", "SREBF1", "ALG3", "HMOX1", "EBP", "MPDU1", "RHBDF2", "TBXAS1", "RPN1", "HLA-DRA", "SEC61A1", "MAGT1", "HM13", "PTGIS", "EDEM2", "CD4", "RETSAT", "UNC93B1", "LPCAT4", "RRBP1", "SRPRB", "SPCS3", "TYRO3", "TLR8", "ACSL5", "PIGA", "DNAJB9", "DERL1", "PLOD2", "ELOVL5", "RPN2", "CD74", "HLA-DPA1", "ALG8", "PL…
92	RESPONSE TO EXTERNAL STIMULUS%GO%GO:0009605	1.38167e-15	4.95898e-14	1.01754	0.341713	2.41719	339	c("CCL2", "CCL11", "FGF7", "S100A9", "SYK", "PDGFRA", "PLP2", "NCKAP1L", "CDS1", "GLRX2", "SREBF1", "S100A8", "TYROBP", "CCR1", "PPARG", "CDKN1A", "CHL1", "TLR4", "PLAU", "EDN1", "TLR2", "IL6R", "CCL21", "OPN3", "ITGA5", "NR4A2", "NOD2", "CXCL1", "AGTR1", "SDCBP", "ITGA2", "ABLIM3", "IRF1", "FOSL1", "TNFRSF10A", "ASNS", "C5AR1", "LTBR", "TNFRSF1A", "SPP1", "IL10", "PER1", "TLR8", "RPS6KA2", "CLTC…
93	REGULATION OF KINASE ACTIVITY%GO%GO:0043549	1.50594e-15	5.34689e-14	1.01754	0.358194	2.49745	292	c("CCL2", "BMP7", "BLM", "SOCS3", "FPR1", "ATF3", "PDGFRA", "NCKAP1L", "TSPYL2", "TGFA", "SLC11A1", "PIM1", "LRP8", "CDKN1A", "CSF1R", "TLR4", "ADCY3", "EDN1", "MAP3K6", "CCL21", "IRAK1", "THBS1", "PRKAR2A", "TGFBR2", "PRKCD", "ATF4", "DUSP2", "SOCS1", "NOD2", "NGF", "CCNG1", "PPP2R5A", "DUSP1", "GADD45B", "SERTAD1", "TNFRSF10A", "FGR", "ASNS", "C5AR1", "CD4", "MVP", "SRPRB", "DBNDD2", "WNT5A", "…
94	POSITIVE REGULATION OF PHOSPHORYLATION%GO%GO:0042327	1.61646e-15	5.655e-14	1.01754	0.367161	2.54365	260	c("CCL2", "C3", "BMP7", "FPR1", "FGF7", "ATF3", "NCKAP1L", "TSPYL2", "TGFA", "SLC11A1", "PIM1", "WNK3", "LRP8", "CSF1R", "HCLS1", "TLR4", "ADCY3", "ACVRL1", "EDN1", "MAP3K6", "IL6R", "CCL21", "IRAK1", "THBS1", "PRKAR2A", "TGFBR2", "ITGA5", "ATF4", "NOD2", "NGF", "DAB2", "AXIN2", "CD44", "SDCBP", "GADD45B", "TNFRSF10A", "ASNS", "C5AR1", "CD4", "TNFRSF1A", "SRPRB", "CSPG4", "WNT5A", "XBP1", "DNAJB9…
95	POSITIVE REGULATION OF PHOSPHATE METABOLIC PROCESS%GO%GO:0045937	1.64409e-15	5.655e-14	1.01754	0.354495	2.47271	293	c("CCL2", "C3", "BMP7", "FPR1", "FGF7", "ATF3", "NCKAP1L", "TSPYL2", "TGFA", "SLC11A1", "PIM1", "WNK3", "LRP8", "CSF1R", "HCLS1", "TLR4", "ADCY3", "ACVRL1", "EDN1", "MAP3K6", "IL6R", "CCL21", "IRAK1", "THBS1", "PRKAR2A", "TGFBR2", "PRKCD", "ITGA5", "ATF4", "NOD2", "NGF", "DAB2", "PPP2R5A", "RAMP1", "AXIN2", "CD44", "SDCBP", "GADD45B", "PID1", "TNFRSF10A", "ASNS", "C5AR1", "CD4", "TNFRSF1A", "SRPR…
96	POSITIVE REGULATION OF PHOSPHORUS METABOLIC PROCESS%GO%GO:0010562	1.64409e-15	5.655e-14	1.01754	0.354495	2.47271	293	c("CCL2", "C3", "BMP7", "FPR1", "FGF7", "ATF3", "NCKAP1L", "TSPYL2", "TGFA", "SLC11A1", "PIM1", "WNK3", "LRP8", "CSF1R", "HCLS1", "TLR4", "ADCY3", "ACVRL1", "EDN1", "MAP3K6", "IL6R", "CCL21", "IRAK1", "THBS1", "PRKAR2A", "TGFBR2", "PRKCD", "ITGA5", "ATF4", "NOD2", "NGF", "DAB2", "PPP2R5A", "RAMP1", "AXIN2", "CD44", "SDCBP", "GADD45B", "PID1", "TNFRSF10A", "ASNS", "C5AR1", "CD4", "TNFRSF1A", "SRPR…
97	REGULATION OF CELLULAR COMPONENT ORGANIZATION%GO%GO:0051128	1.72699e-15	5.87888e-14	1.01754	0.314614	2.26795	456	c("CCL2", "BMP7", "CCL11", "S100A9", "SPOCK1", "SYK", "FGD2", "MID1IP1", "DOCK2", "PDGFRA", "NCKAP1L", "TSPYL2", "PARVB", "CHPT1", "HEY2", "ENO1", "TGFA", "SLC11A1", "WNK3", "S100A8", "BCL6", "LRP8", "MYC", "CDKN1A", "CSF1R", "CDC42EP4", "HCLS1", "PLEK", "NKD2", "ACVRL1", "EDN1", "CCL21", "THBS1", "PRKCD", "SELE", "EPB41L3", "FAM107A", "NGF", "ANXA2", "DCUN1D3", "ALDOA", "DAB2", "DDX3X", "CLIC4",…
98	ORGANIC CYCLIC COMPOUND BIOSYNTHETIC PROCESS%GO%GO:1901362	1.78225e-15	6.00509e-14	1.00732	0.310418	2.24383	474	c("GFPT2", "CEBPD", "ZBTB7B", "PPARG", "MYC", "UAP1", "TSC22D1", "EBP", "SHMT1", "ADA", "HIF1A", "TGIF1", "G6PD", "RPS27", "ATF4", "E2F5", "NR4A2", "TEAD2", "ALDOA", "PAPSS2", "MAFF", "RORB", "SERPINE1", "NR4A3", "ESRRG", "IRF1", "FOSL1", "C5AR1", "SNRPB", "RUNX3", "TK1", "GNPNAT1", "BCL3", "PAPOLA", "HSF2", "PMVK", "ETV7", "RPLP0", "SLC25A13", "MAF", "UGP2", "MSC", "RPS19", "BATF3", "PMM2", "AKR…
99	AROMATIC COMPOUND BIOSYNTHETIC PROCESS%GO%GO:0019438	1.92041e-15	6.40523e-14	1.00732	0.313934	2.25322	431	c("GFPT2", "CEBPD", "ZBTB7B", "PPARG", "MYC", "UAP1", "TSC22D1", "SHMT1", "ADA", "HIF1A", "TGIF1", "RPS27", "ATF4", "E2F5", "NR4A2", "TEAD2", "ALDOA", "PAPSS2", "MAFF", "RORB", "SERPINE1", "NR4A3", "ESRRG", "IRF1", "FOSL1", "C5AR1", "SNRPB", "RUNX3", "TK1", "GNPNAT1", "BCL3", "PAPOLA", "HSF2", "ETV7", "RPLP0", "SLC25A13", "MAF", "UGP2", "MSC", "RPS19", "BATF3", "PMM2", "ABCB6", "PAICS", "RARA", "…
100	CELLULAR RESPONSE TO CYTOKINE STIMULUS%GO%GO:0071345	2.47303e-15	8.16595e-14	1.00732	0.401868	2.70206	194	c("CCL2", "SOCS3", "IFI30", "OSMR", "PLP2", "IRF8", "IL15RA", "MT1X", "ISG20", "CCR1", "HAS2", "LRP8", "STAT3", "CSF1R", "IL1R1", "HCLS1", "AQP4", "HIF1A", "IL6R", "IRAK1", "IFITM2", "PRKCD", "SOCS1", "HLA-DRA", "EIF4G1", "EBI3", "CD44", "PTGIS", "PID1", "IRF1", "KPNA2", "B2M", "IL17RB", "AXL", "TNFRSF1A", "EIF4A1", "WNT5A", "AIF1", "IRAK3", "IFI27", "HYAL2", "IFNGR1", "MT2A", "IFITM1", "PSMB8", …
101	ENZYME REGULATOR ACTIVITY%GO%GO:0030234	2.97121e-15	9.71381e-14	1.00732	0.351567	2.45369	295	c("SOCS3", "SERPINA3", "PPP1R1A", "SPOCK1", "FGD2", "DOCK2", "NCKAP1L", "TIMP4", "ANGPTL4", "TNFAIP8", "CDKN1A", "TFPI", "SERPINA1", "PRKAR2A", "TIMP3", "PRKCD", "SOCS1", "SPATA13", "CXCL1", "AGTR1", "TESC", "SERPINE1", "PREX1", "AXIN2", "TBC1D2", "PRKRA", "RGS19", "RGS18", "RGS10", "TIMP1", "RGS1", "SERPINH1", "CAST", "HYAL2", "SERPINB1", "CABP1", "PSAP", "NKX3-1", "CST3", "MAL", "MYBPC3", "ERRF…
102	VIRAL REPRODUCTION%GO%GO:0016032	3.85978e-15	1.24951e-13	0.996986	0.383837	2.62434	222	c("CCL2", "DOCK2", "CD209", "XRCC4", "RPS27", "CALCOCO2", "PSME2", "CD4", "B2M", "PSMD8", "RPLP0", "HYAL2", "RPS19", "PSMB8", "DERL1", "HIPK2", "RPL34", "TAP1", "RPL27A", "RPS5", "RPL29", "RPL18", "RPS18", "FURIN", "RPL24", "RPL13", "LRSAM1", "RPS17", "RPS3", "NUP205", "RPL35", "PSME4", "ITCH", "RPS15A", "AP1B1", "PSMA4", "RPS2", "PSME1", "RXRA", "RPS28", "PSMA6", "RPSA", "RPL41", "RPLP2", "RPL18…
103	POSITIVE REGULATION OF PROTEIN PHOSPHORYLATION%GO%GO:0001934	4.19299e-15	1.3442e-13	0.996986	0.367578	2.5457	258	c("CCL2", "C3", "BMP7", "FPR1", "FGF7", "ATF3", "NCKAP1L", "TSPYL2", "TGFA", "SLC11A1", "PIM1", "WNK3", "LRP8", "CSF1R", "HCLS1", "TLR4", "ADCY3", "ACVRL1", "EDN1", "MAP3K6", "IL6R", "CCL21", "IRAK1", "THBS1", "PRKAR2A", "TGFBR2", "ITGA5", "ATF4", "NOD2", "NGF", "DAB2", "AXIN2", "CD44", "GADD45B", "TNFRSF10A", "ASNS", "C5AR1", "CD4", "TNFRSF1A", "SRPRB", "CSPG4", "WNT5A", "XBP1", "DNAJB9", "ADD1"…
104	MULTI-ORGANISM CELLULAR PROCESS%GO%GO:0044764	5.1371e-15	1.63103e-13	0.996986	0.38511	2.63405	223	c("CCL2", "DOCK2", "CD209", "XRCC4", "RPS27", "CALCOCO2", "PSME2", "CD4", "B2M", "PSMD8", "RPLP0", "HYAL2", "RPS19", "PSMB8", "DERL1", "HIPK2", "RPL34", "TAP1", "RPL27A", "RPS5", "RPL29", "RPL18", "RPS18", "FURIN", "RPL24", "RPL13", "LRSAM1", "RPS17", "RPS3", "NUP205", "RPL35", "PSME4", "ITCH", "RPS15A", "AP1B1", "PSMA4", "RPS2", "PSME1", "RXRA", "RPS28", "PSMA6", "RPSA", "RPL41", "RPLP2", "RPL18…
105	NUCLEAR OUTER MEMBRANE-ENDOPLASMIC RETICULUM MEMBRANE NETWORK%GO%GO:0042175	5.58138e-15	1.75521e-13	0.996986	0.361342	2.50846	271	c("LPCAT3", "MGST1", "ATP2A2", "APOB", "SGPP2", "PLA2G2A", "PTDSS1", "PLP2", "CDS1", "CYP4B1", "SREBF1", "ALG3", "HMOX1", "EBP", "MPDU1", "RHBDF2", "TBXAS1", "RPN1", "HLA-DRA", "SEC61A1", "MAGT1", "HM13", "PTGIS", "EDEM2", "CD4", "RETSAT", "UNC93B1", "LPCAT4", "RRBP1", "SRPRB", "SPCS3", "TYRO3", "TLR8", "ACSL5", "PIGA", "DNAJB9", "EIF5A", "DERL1", "PLOD2", "ELOVL5", "RPN2", "CD74", "HLA-DPA1", "A…
106	OXOACID METABOLIC PROCESS%GO%GO:0043436	5.97177e-15	1.86026e-13	0.996986	0.345423	2.42069	312	c("LPCAT3", "SLC2A1", "PLA2G2A", "SLC2A3", "LDHA", "PTDSS1", "CHST7", "GGT5", "GLRX2", "GNMT", "CBS", "AASS", "BCAT1", "CHST9", "CEL", "PLSCR1", "ALOX5", "GPT2", "EDN1", "GLUL", "SHMT1", "AKR1C2", "P4HB", "SLC7A8", "TST", "G6PD", "SLC6A6", "TBXAS1", "ATF4", "ALOX5AP", "PAPSS2", "ABCC3", "GCAT", "IDH1", "PTGIS", "CHSY1", "ST3GAL1", "FABP6", "ASNS", "PPA2", "LPCAT4", "CKB", "FASN", "B4GALT6", "CSPG…
107	ORGANIC ACID METABOLIC PROCESS%GO%GO:0006082	6.19501e-15	1.89976e-13	0.996986	0.345701	2.42757	317	c("LPCAT3", "SLC2A1", "PLA2G2A", "SLC2A3", "LDHA", "PTDSS1", "CHST7", "GGT5", "GLRX2", "GNMT", "CBS", "AASS", "BCAT1", "CHST9", "CEL", "PLSCR1", "ALOX5", "GPT2", "EDN1", "GLUL", "SHMT1", "AKR1C2", "P4HB", "SLC7A8", "TST", "G6PD", "SLC6A6", "TBXAS1", "ATF4", "ALOX5AP", "PAPSS2", "ABCC3", "GCAT", "IDH1", "PTGIS", "CHSY1", "ST3GAL1", "FABP6", "ASNS", "PPA2", "LPCAT4", "CKB", "FASN", "B4GALT6", "CSPG…
108	REGULATION OF INNATE IMMUNE RESPONSE%GO%GO:0045088	6.21363e-15	1.89976e-13	0.996986	0.458856	2.90842	124	c("SOCS3", "BIRC3", "PPARG", "TLR4", "PVR", "PLSCR1", "TLR2", "BTK", "MARCO", "SAMHD1", "IRAK1", "SOCS1", "NOD2", "LY96", "IRF1", "FGR", "UNC93B1", "TYRO3", "TLR8", "RPS6KA2", "WNT5A", "IRAK3", "CLEC7A", "IFNGR1", "RPS19", "PIK3AP1", "JAK1", "PYCARD", "MAP2K1", "IFI16", "NR1H2", "RIPK2", "SERPING1", "NFKBIA", "NFKBIB", "TRIM5", "ITCH", "PARP9", "CD14", "RPS6KA1", "RIPK1", "MAPKAPK3", "IRAK4", "MY…
109	SMALL MOLECULE BINDING%GO%GO:0036094	6.64149e-15	2.01194e-13	0.996986	0.371344	2.55753	243	c("BLM", "TUBA3D", "HK3", "PIM1", "WNK3", "PDE4D", "CYBB", "SEC14L2", "ACVRL1", "BTK", "ABCG1", "MAP3K6", "TCN2", "G6PD", "GALK1", "GNL3", "NME1", "WNK1", "RUNX3", "STK17B", "CDK6", "PAPOLA", "UHRF1", "RAB8B", "GNA15", "SPHK1", "P2RX5", "PMVK", "PDK4", "IRAK3", "OSBPL3", "CD320", "DPYD", "ABCB6", "PNPLA8", "TAP1", "NME1-NME2", "FBP1", "OSBPL8", "NPC2", "PDE2A", "ABCD3", "RHOB", "PYGL", "ADAP2", "…
110	CELLULAR MACROMOLECULE CATABOLIC PROCESS%GO%GO:0044265	8.87387e-15	2.66378e-13	0.986546	0.349119	2.43681	298	c("BLM", "NGLY1", "ADAMTS9", "RNASE6", "ISG20", "RPS27", "RNF144B", "EIF4G1", "CDK2", "PSME2", "HECTD1", "PSMD8", "HSPA1B", "UHRF1", "EIF4A1", "RPLP0", "DNAJB9", "RPS19", "ZFP36", "PSMB8", "DERL1", "AURKA", "RNASE2", "UCHL3", "EXOSC4", "RPL34", "UBE2D3", "TNKS1BP1", "RPL27A", "RPS5", "RPL29", "RPL18", "RPS18", "RPL24", "RPL13", "ETF1", "RPS17", "RPS3", "RPL35", "PSME4", "SEC61B", "UBE2V2", "ITCH"…
111	NEGATIVE REGULATION OF MOLECULAR FUNCTION%GO%GO:0044092	8.98549e-15	2.67298e-13	0.986546	0.352059	2.45358	288	c("BMP7", "SOCS3", "SERPINA3", "SPOCK1", "NCKAP1L", "HEY2", "PIM1", "ANGPTL4", "TNFAIP8", "TFPI", "SERPINA1", "IRAK1", "THBS1", "PRKCD", "DUSP2", "SOCS1", "GABBR2", "DAB2", "DDX3X", "GLA", "PPP2R5A", "DUSP1", "SERPINE1", "CD44", "PTGIS", "PSME2", "WNK1", "PSMD8", "MVP", "NDFIP2", "DBNDD2", "UBN1", "IRAK3", "SERPINH1", "CAST", "HYAL2", "SERPINB1", "CABP1", "PSMB8", "NKX3-1", "CST3", "EGLN1", "ERRF…
112	PROTEIN TARGETING TO ER%GO%GO:0045047	1.16704e-14	3.41025e-13	0.986546	0.495199	2.99324	95	c("SSR3", "RPS27", "RPN1", "SEC61A1", "SRPRB", "SPCS3", "RPLP0", "RPS19", "RPN2", "RPL34", "RPL27A", "RPS5", "RPL29", "RPL18", "RPS18", "SEC11C", "SPCS2", "RPL24", "RPL13", "SSR4", "RPS17", "RPS3", "RPL35", "SEC61B", "RPS15A", "RPS2", "DDOST", "RPS28", "RPSA", "RPL41", "RPLP2", "RPL18A", "RPS10", "RPL12", "RPS9", "RPL36A", "SSR1", "RPS6", "RPL21", "TRAM1", "RPL28", "RPL26", "RPS12", "SRP72", "RPL…
113	SRP-DEPENDENT COTRANSLATIONAL PROTEIN TARGETING TO MEMBRANE%REACTOME%REACT_115902.1	1.16704e-14	3.41025e-13	0.986546	0.495199	2.99324	95	c("SSR3", "RPS27", "RPN1", "SEC61A1", "SRPRB", "SPCS3", "RPLP0", "RPS19", "RPN2", "RPL34", "RPL27A", "RPS5", "RPL29", "RPL18", "RPS18", "SEC11C", "SPCS2", "RPL24", "RPL13", "SSR4", "RPS17", "RPS3", "RPL35", "SEC61B", "RPS15A", "RPS2", "DDOST", "RPS28", "RPSA", "RPL41", "RPLP2", "RPL18A", "RPS10", "RPL12", "RPS9", "RPL36A", "SSR1", "RPS6", "RPL21", "TRAM1", "RPL28", "RPL26", "RPS12", "SRP72", "RPL…
114	REGULATION OF PROTEIN KINASE ACTIVITY%GO%GO:0045859	1.22269e-14	3.5415e-13	0.986546	0.352795	2.45507	283	c("CCL2", "BMP7", "BLM", "SOCS3", "FPR1", "ATF3", "NCKAP1L", "TSPYL2", "TGFA", "SLC11A1", "PIM1", "LRP8", "CDKN1A", "CSF1R", "TLR4", "ADCY3", "EDN1", "MAP3K6", "CCL21", "IRAK1", "THBS1", "PRKAR2A", "TGFBR2", "PRKCD", "ATF4", "DUSP2", "SOCS1", "NOD2", "NGF", "CCNG1", "DUSP1", "GADD45B", "SERTAD1", "TNFRSF10A", "FGR", "ASNS", "C5AR1", "CD4", "MVP", "SRPRB", "DBNDD2", "WNT5A", "XBP1", "IRAK3", "HYAL…
115	NUCLEOBASE-CONTAINING COMPOUND BIOSYNTHETIC PROCESS%GO%GO:0034654	1.24512e-14	3.57512e-13	0.986546	0.317028	2.26977	418	c("GFPT2", "CEBPD", "ZBTB7B", "PPARG", "MYC", "UAP1", "TSC22D1", "ADA", "HIF1A", "TGIF1", "RPS27", "ATF4", "E2F5", "NR4A2", "TEAD2", "ALDOA", "PAPSS2", "MAFF", "RORB", "SERPINE1", "NR4A3", "ESRRG", "IRF1", "FOSL1", "C5AR1", "SNRPB", "RUNX3", "TK1", "GNPNAT1", "BCL3", "PAPOLA", "HSF2", "ETV7", "RPLP0", "SLC25A13", "MAF", "UGP2", "MSC", "RPS19", "BATF3", "PMM2", "PAICS", "RARA", "RPL34", "UBE2D3", …
116	LIPID METABOLIC PROCESS%GO%GO:0006629	1.4919e-14	4.24676e-13	0.975995	0.319789	2.28196	387	c("LPCAT3", "APOB", "SGPP2", "PLA2G2A", "PTDSS1", "PRDX6", "GGT5", "CHPT1", "CDS1", "PLTP", "ANGPTL4", "SREBF1", "NANS", "RDH10", "PPARG", "LRP8", "CSF1R", "CEL", "ABHD5", "PLEK", "EBP", "PLSCR1", "ALOX5", "EDN1", "GPD1", "SLC44A3", "ABCG1", "AKR1C2", "P4HB", "G6PD", "PIK3R3", "FABP5", "GLIPR1", "ALOX5AP", "GLA", "ETNK2", "ABCC3", "PDSS1", "IDH1", "PTGIS", "TNFRSF21", "FABP6", "RETSAT", "LPCAT4",…
117	COTRANSLATIONAL PROTEIN TARGETING TO MEMBRANE%GO%GO:0006613	1.9375e-14	5.46805e-13	0.975995	0.492166	2.9749	95	c("SSR3", "RPS27", "RPN1", "SRPRB", "SPCS3", "RPLP0", "RPS19", "RPN2", "RPL34", "RPL27A", "RPS5", "RPL29", "RPL18", "RPS18", "SEC11C", "SPCS2", "RPL24", "RPL13", "SSR4", "RPS17", "RPS3", "RPL35", "SEC61B", "RPS15A", "RPS2", "DDOST", "RPS28", "RPSA", "RPL41", "RPLP2", "RPL18A", "RPS10", "RPL12", "RPS9", "RPL36A", "SSR1", "RPS6", "RPL21", "TRAM1", "RPL28", "RPL26", "RPS12", "SRP72", "RPL37A", "SSR2…
118	REGULATION OF RESPONSE TO EXTERNAL STIMULUS%GO%GO:0032101	2.05686e-14	5.75572e-13	0.975995	0.422288	2.75662	154	c("CCL2", "C3", "PLA2G2A", "S100A9", "BIRC3", "OSMR", "SYK", "PDGFRA", "NCKAP1L", "S100A8", "CCR1", "TLR4", "PLEK", "PLAU", "EDN1", "TLR2", "IL6R", "CCL21", "THBS1", "PRKCD", "SELE", "NOD2", "AGTR1", "SERPINE1", "PTGIS", "TNFRSF1A", "SNAI2", "TYRO3", "WNT5A", "AIF1", "HYAL2", "ANGPT2", "RPS19", "CD55", "PIK3AP1", "C2", "CD74", "PLAUR", "S100A12", "TEK", "PDE2A", "PTEN", "SERPING1", "MAPK13", "SBN…
119	CELLULAR RESPONSE TO GROWTH FACTOR STIMULUS%GO%GO:0071363	2.18735e-14	6.06945e-13	0.975995	0.377734	2.58261	222	c("CCL2", "FGF7", "FGD2", "PDGFRA", "FGF12", "HAS2", "MYC", "STAT3", "DDIT4", "ADCY3", "ACVRL1", "TGFBR3", "TGIF1", "IRAK1", "PRKAR2A", "TGFBR2", "PRKCD", "E2F5", "NGF", "GAS1", "SERPINE1", "PREX1", "CD44", "SNAI2", "NGFR", "RPS6KA2", "CLTC", "PPP1CC", "WNT5A", "GRB2", "HYAL2", "FGFRL1", "UBE2D3", "MAP2K1", "TRIO", "RIPK2", "PDE2A", "PPP2CB", "PPP1CA", "PTEN", "BAD", "ITSN1", "MAPK13", "FURIN", "…
120	MOLECULAR TRANSDUCER ACTIVITY%GO%GO:0060089	2.23222e-14	6.09157e-13	0.975995	0.326086	2.32182	370	c("S1PR3", "FPR1", "S100A9", "OSMR", "PDGFRA", "IL15RA", "LILRB5", "TYROBP", "CCR1", "PPARG", "LRP8", "STAT3", "CSF1R", "IL1R1", "TLR4", "IL1RL1", "HMOX1", "EBP", "IL17RA", "EFEMP1", "ACVRL1", "TGFBR3", "TLR2", "CD86", "MARCO", "C3AR1", "MAP3K6", "AKR1C2", "IL6R", "IRAK1", "TGFBR2", "OPN3", "SELE", "HLA-DRA", "GPR34", "GNAO1", "PTPRU", "IGSF6", "AGTR1", "RAMP1", "PTPRG", "LY96", "EBI3", "CD44", "…
121	SIGNAL TRANSDUCER ACTIVITY%GO%GO:0004871	2.23222e-14	6.09157e-13	0.975995	0.326086	2.32182	370	c("S1PR3", "FPR1", "S100A9", "OSMR", "PDGFRA", "IL15RA", "LILRB5", "TYROBP", "CCR1", "PPARG", "LRP8", "STAT3", "CSF1R", "IL1R1", "TLR4", "IL1RL1", "HMOX1", "EBP", "IL17RA", "EFEMP1", "ACVRL1", "TGFBR3", "TLR2", "CD86", "MARCO", "C3AR1", "MAP3K6", "AKR1C2", "IL6R", "IRAK1", "TGFBR2", "OPN3", "SELE", "HLA-DRA", "GPR34", "GNAO1", "PTPRU", "IGSF6", "AGTR1", "RAMP1", "PTPRG", "LY96", "EBI3", "CD44", "…
122	REGULATION OF TRANSFERASE ACTIVITY%GO%GO:0051338	2.36727e-14	6.40715e-13	0.975995	0.344807	2.40784	301	c("CCL2", "BMP7", "BLM", "SOCS3", "FPR1", "ATF3", "PDGFRA", "NCKAP1L", "TSPYL2", "TGFA", "SLC11A1", "PIM1", "LRP8", "CDKN1A", "CSF1R", "TLR4", "ADCY3", "EDN1", "MAP3K6", "CCL21", "IRAK1", "THBS1", "PRKAR2A", "TGFBR2", "PRKCD", "ATF4", "DUSP2", "SOCS1", "NOD2", "NGF", "CCNG1", "PPP2R5A", "DUSP1", "GADD45B", "SERTAD1", "TNFRSF10A", "FGR", "ASNS", "C5AR1", "CD4", "MVP", "SRPRB", "DBNDD2", "WNT5A", "…
123	PROTEIN LOCALIZATION TO ENDOPLASMIC RETICULUM%GO%GO:0070972	2.55529e-14	6.8598e-13	0.975995	0.478196	2.94213	102	c("SSR3", "RPS27", "RPN1", "SEC61A1", "SRPRB", "SPCS3", "RPLP0", "RPS19", "RPN2", "RPL34", "RPL27A", "RPS5", "RPL29", "RPL18", "RPS18", "SEC11C", "SPCS2", "RPL24", "RPL13", "SSR4", "RPS17", "RPS3", "RPL35", "SEC61B", "RPS15A", "RPS2", "DDOST", "RPS28", "RPSA", "RPL41", "RPLP2", "RPL18A", "RPS10", "RPL12", "RPS9", "RPL36A", "SSR1", "RPS6", "RPL21", "TRAM1", "RPL28", "RPL26", "RPS12", "SRP72", "RPL…
124	POSITIVE REGULATION OF DEFENSE RESPONSE%GO%GO:0031349	3.01661e-14	8.03293e-13	0.965328	0.464883	2.90145	114	c("PLA2G2A", "S100A9", "OSMR", "S100A8", "TLR4", "PVR", "PLSCR1", "TLR2", "BTK", "MARCO", "IRAK1", "NOD2", "AGTR1", "SERPINE1", "LY96", "TNFRSF1A", "UNC93B1", "TLR8", "RPS6KA2", "WNT5A", "IRAK3", "CLEC7A", "HYAL2", "RPS19", "PIK3AP1", "PYCARD", "MAP2K1", "S100A12", "IFI16", "RIPK2", "PDE2A", "MAPK13", "NFKBIA", "NFKBIB", "TRIM5", "ITCH", "CD14", "RPS6KA1", "RIPK1", "MAPKAPK3", "IRAK4", "MYD88", "…
125	RESPONSE TO GROWTH FACTOR STIMULUS%GO%GO:0070848	3.13379e-14	8.27823e-13	0.965328	0.380385	2.60685	225	c("CCL2", "FGF7", "FGD2", "PDGFRA", "FGF12", "HAS2", "MYC", "STAT3", "DDIT4", "ADCY3", "ACVRL1", "TGFBR3", "TGIF1", "IRAK1", "PRKAR2A", "TGFBR2", "PRKCD", "E2F5", "NGF", "GAS1", "SERPINE1", "PREX1", "CD44", "SNAI2", "NGFR", "RPS6KA2", "CLTC", "PPP1CC", "WNT5A", "GRB2", "HYAL2", "FGFRL1", "UBE2D3", "MAP2K1", "TRIO", "RIPK2", "PDE2A", "PPP2CB", "PPP1CA", "PTEN", "BAD", "ITSN1", "MAPK13", "FURIN", "…
126	ESTABLISHMENT OF PROTEIN LOCALIZATION TO ENDOPLASMIC RETICULUM%GO%GO:0072599	3.53334e-14	9.2596e-13	0.965328	0.490309	2.96912	96	c("SSR3", "RPS27", "RPN1", "SEC61A1", "SRPRB", "SPCS3", "RPLP0", "RPS19", "RPN2", "RPL34", "RPL27A", "RPS5", "RPL29", "RPL18", "RPS18", "SEC11C", "SPCS2", "RPL24", "RPL13", "SSR4", "RPS17", "RPS3", "RPL35", "SEC61B", "RPS15A", "RPS2", "DDOST", "RPS28", "RPSA", "RPL41", "RPLP2", "RPL18A", "RPS10", "RPL12", "RPS9", "RPL36A", "SSR1", "RPS6", "RPL21", "TRAM1", "RPL28", "RPL26", "RPS12", "SRP72", "RPL…
127	NEGATIVE REGULATION OF PROTEIN METABOLIC PROCESS%GO%GO:0051248	3.76505e-14	9.71266e-13	0.965328	0.373138	2.54373	218	c("BMP7", "SOCS3", "SAMSN1", "DDIT4", "EDN1", "THBS1", "TIMP3", "G6PD", "PRKCD", "DUSP2", "SOCS1", "GAS1", "DDX3X", "SPI1", "DUSP1", "SERPINE1", "PID1", "PSME2", "PSMD8", "MVP", "BCL3", "IL10", "TIMP1", "DBNDD2", "NF2", "IRAK3", "HYAL2", "ZFP36", "PSMB8", "CST3", "ERRFI1", "PYCARD", "GMFG", "PTEN", "RGS2", "SERPING1", "EDNRB", "FURIN", "DNAJC3", "CAV1", "GSTP1", "BTG2", "GMFB", "PSMA4", "ITGB3", …
128	RESPONSE TO OXYGEN-CONTAINING COMPOUND%GO%GO:1901700	3.76505e-14	9.71266e-13	0.965328	0.352368	2.44329	266	c("CCL2", "NAMPT", "MGST1", "SOCS3", "FGF7", "EIF4EBP1", "GLRX2", "SLC11A1", "PPARG", "STAT3", "TLR4", "HMOX1", "ADCY3", "TGFBR3", "TLR2", "AQP9", "AKR1C2", "CCL21", "IRAK1", "THBS1", "PRKAR2A", "TGFBR2", "GPX3", "SOCS1", "SELE", "NOD2", "EIF4G1", "MYO5A", "TESC", "SERPINE1", "LY96", "CDK2", "PID1", "AXL", "SPP1", "IL10", "PMVK", "PDK4", "WNT5A", "GRB2", "IRAK3", "CLEC7A", "HYAL2", "SOD2", "LILRB…
129	CELLULAR NITROGEN COMPOUND CATABOLIC PROCESS%GO%GO:0044270	4.12577e-14	1.05607e-12	0.965328	0.345848	2.40637	280	c("MYH6", "BLM", "PDE4D", "RNASE6", "ISG20", "APOBEC2", "RHOD", "HMOX1", "ADA", "TST", "GNL3", "RPS27", "EIF4G1", "DDX3X", "EIF5", "HSPA1B", "RAB8B", "MPST", "RAP1GAP", "EIF4A1", "RPLP0", "RPS19", "ZFP36", "ACLY", "RNASE2", "EFTUD2", "DPYD", "EXOSC4", "RPL34", "TNKS1BP1", "RPL27A", "GPX1", "RPS5", "PDE2A", "ABCD3", "RPL29", "RHOB", "RPL18", "RPS18", "ATL3", "GNL2", "NCF1", "MSH6", "RPL24", "RPL13…
130	ORGANOPHOSPHATE METABOLIC PROCESS%GO%GO:0019637	4.6673e-14	1.17644e-12	0.965328	0.325917	2.31753	359	c("MYH6", "HK2", "NAMPT", "LPCAT3", "GFPT2", "BLM", "SGPP2", "PLA2G2A", "HK3", "PTDSS1", "PRDX6", "NUDT4", "CHPT1", "CDS1", "PDE4D", "CSF1R", "UAP1", "ABHD5", "PLEK", "RHOD", "PLSCR1", "GPD1", "SLC44A3", "ADA", "G6PD", "TKT", "PIK3R3", "GNL3", "IMPA2", "ALDOA", "DDX3X", "PAPSS2", "GLA", "ETNK2", "EIF5", "IDH1", "TK1", "GNPNAT1", "LPCAT4", "RAB8B", "SPHK1", "SGMS2", "RAP1GAP", "SLC25A13", "UGP2", …
131	TRANSFERASE ACTIVITY, TRANSFERRING PHOSPHORUS-CONTAINING GROUPS%GO%GO:0016772	4.6673e-14	1.17644e-12	0.965328	0.336287	2.36333	319	c("CCL2", "HK2", "MARK3", "HK3", "SYK", "MPP3", "PDGFRA", "CHPT1", "CDS1", "TGFA", "PIM1", "MAP3K8", "WNK3", "NANS", "CDKN1A", "CSF1R", "UAP1", "GRK5", "EFEMP1", "ACVRL1", "TGFBR3", "BTK", "MAP3K6", "IRAK1", "TGFBR2", "PIK3R3", "PRKCD", "GALK1", "PAPSS2", "NME1", "CDK2", "DCLK1", "WNK1", "FGR", "STK17B", "TK1", "CDK6", "PAPOLA", "TYRO3", "SPHK1", "RPS6KA2", "SGMS2", "PMVK", "PDK4", "IRAK3", "UGP2…
132	METABOLISM OF RNA%REACTOME%REACT_21257.2	5.12042e-14	1.28088e-12	0.965328	0.398284	2.65279	178	c("PRKCD", "RPS27", "TNPO1", "EIF4G1", "PSME2", "SNRPB", "PSMD8", "HSPA1B", "EIF4A1", "RPLP0", "RPS19", "ZFP36", "PSMB8", "EXOSC4", "RPL34", "TNKS1BP1", "RPL27A", "RPS5", "RPL29", "RPL18", "RPS18", "RPL24", "RPL13", "ETF1", "RPS17", "RPS3", "NUP205", "RPL35", "SNRPG", "PSME4", "RPS15A", "PSMA4", "RPS2", "LSM6", "MAGOH", "PSME1", "RPS28", "PSMA6", "RPSA", "YWHAZ", "RPL41", "RPLP2", "RPL18A", "RPS1…
133	CELLULAR RESPONSE TO STRESS%GO%GO:0033554	5.48292e-14	1.36125e-12	0.965328	0.302193	2.17531	449	c("CCL2", "BMP7", "MGST1", "BLM", "ATF3", "FGF12", "TSPYL2", "GLRX2", "SREBF1", "BCL6", "HAS2", "MYC", "CDKN1A", "HMOX1", "DDIT4", "XRCC4", "MAP3K6", "HIF1A", "IRAK1", "THBS1", "G6PD", "PRKCD", "ATF4", "GPX3", "NOD2", "DDX3X", "PTGIS", "CDK2", "RTN4RL1", "PSME2", "ASNS", "PSMD8", "BCL3", "SRPRB", "RPS6KA2", "SLC11A2", "PDK4", "WNT5A", "XBP1", "GRB2", "DNAJB9", "SOD2", "ADD1", "PSMB8", "DERL1", "R…
134	CYTOPLASMIC TRANSPORT%GO%GO:0016482	5.66416e-14	1.39575e-12	0.965328	0.350966	2.43361	265	c("HOOK1", "BCL6", "STAT3", "SSR3", "CCL21", "RPS27", "RPN1", "TNPO1", "SEC61A1", "KPNA2", "BCL3", "SRPRB", "SPCS3", "RAB8B", "CBLB", "RPLP0", "RPS19", "HTATIP2", "EIF5A", "AKR1C3", "RPN2", "RPL34", "MALT1", "TAP1", "RPL27A", "RPS5", "PDE2A", "RPL29", "RHOB", "RPL18", "RPS18", "AKTIP", "SURF4", "ATL3", "SEC11C", "SPCS2", "RPL24", "SEC24D", "RPL13", "TMED9", "SSR4", "RPS17", "RPS3", "NUP205", "RPL…
135	ION TRANSPORT%GO%GO:0006811	6.02666e-14	1.47408e-12	0.954542	0.346312	2.41238	287	c("ATP2A2", "SLCO4A1", "ATP1B3", "ATP1B1", "SLC1A5", "KCNIP2", "KCNK1", "SYK", "KLHL3", "ATP1A1", "PLP2", "CA14", "PDPN", "SLC11A1", "SLC9A7", "CCR1", "PPARG", "SLC38A1", "SLC9A9", "SLC36A4", "SLC1A3", "HCN4", "SLC36A1", "AQP9", "SLC38A2", "KCNJ8", "SCARA5", "TFRC", "CCL21", "SLC4A7", "SLC7A8", "SLC39A8", "SLC6A6", "SLC4A3", "FOLR2", "SLCO2A1", "SLC39A14", "SLC31A2", "CLIC4", "ABCC3", "KCNH2", "R…
136	RIBONUCLEOTIDE BINDING%GO%GO:0032553	6.29854e-14	1.52925e-12	0.954542	0.397867	2.64578	177	c("BLM", "TUBA3D", "HK3", "PIM1", "WNK3", "PDE4D", "ACVRL1", "BTK", "ABCG1", "MAP3K6", "GALK1", "GNL3", "NME1", "WNK1", "RUNX3", "STK17B", "CDK6", "PAPOLA", "RAB8B", "GNA15", "SPHK1", "P2RX5", "PMVK", "PDK4", "IRAK3", "ABCB6", "PNPLA8", "TAP1", "NME1-NME2", "FBP1", "PDE2A", "ABCD3", "RHOB", "PYGL", "RAB8A", "GNL2", "NCF1", "MSH6", "PDE11A", "NEK6", "MYO1B", "UHMK1", "OXSR1", "HSP90AA1", "PDXK", "…
137	Protein processing in endoplasmic reticulum%KEGG%hsa04141	6.43416e-14	1.55077e-12	0.954542	0.463763	2.87568	110	c("NGLY1", "HSPA6", "SSR3", "P4HB", "ATF4", "RPN1", "SEC61A1", "PDIA4", "EDEM2", "RRBP1", "HSPA1B", "XBP1", "DERL1", "RPN2", "UBE2D3", "MAN1A1", "ATF6", "SEC24D", "SSR4", "CRYAB", "DNAJC3", "SEC61B", "SEL1L", "TXNDC5", "FBXO6", "SIL1", "CKAP4", "DDOST", "HSP90AA1", "HSP90B1", "BAK1", "DNAJB1", "UBE2J1", "SEC23B", "SSR1", "DNAJC1", "TRAM1", "CALR", "SSR2", "WFS1", "GANAB", "DNAJC5", "DAD1", "PDIA6…
138	NUCLEOSIDE PHOSPHATE BINDING%GO%GO:1901265	6.66104e-14	1.59382e-12	0.954542	0.377891	2.56166	209	c("BLM", "TUBA3D", "HK3", "PIM1", "WNK3", "PDE4D", "CYBB", "ACVRL1", "BTK", "ABCG1", "MAP3K6", "G6PD", "GALK1", "GNL3", "NME1", "WNK1", "RUNX3", "STK17B", "CDK6", "PAPOLA", "UHRF1", "RAB8B", "GNA15", "SPHK1", "P2RX5", "PMVK", "PDK4", "IRAK3", "DPYD", "ABCB6", "PNPLA8", "TAP1", "NME1-NME2", "FBP1", "PDE2A", "ABCD3", "RHOB", "PYGL", "RAB8A", "GNL2", "NCF1", "MSH6", "PDE11A", "NEK6", "MYO1B", "UHMK1…
139	PDGFR-BETA SIGNALING PATHWAY%PATHWAY INTERACTION DATABASE NCI-NATURE CURATED DATA%PDGFR-BETA SIGNALING PATHWAY	7.19321e-14	1.70878e-12	0.954542	0.51987	3.04944	79	c("SLA", "MYC", "STAT3", "PRKCD", "FGR", "SPHK1", "GRB2", "EPS8", "MAP2K1", "ACTA2", "PTEN", "ARPC1B", "YES1", "ARPC3", "IQGAP1", "YWHAH", "ARPC5", "TAGLN", "ACTR2", "ARPC4", "BAIAP2", "ITGB3", "ACTR3", "YWHAZ", "PDGFRB", "RAB5A", "MAP2K4", "LYN", "ARHGDIA", "HCK", "LRP1", "ELK1", "PTPN1", "RAP1B", "NCKAP1", "CSK", "SLC9A3R2", "NRAS", "ARPC2", "DOK1", "SIPA1", "JUN", "FOS", "SHC1", "PLA2G4A", "MA…
140	RECEPTOR BINDING%GO%GO:0005102	7.56729e-14	1.7848e-12	0.954542	0.314881	2.2499	396	c("CCL2", "C3", "NAMPT", "APOB", "CCL11", "S100A9", "SYK", "DOCK2", "PDGFRA", "FGF12", "FERMT3", "TGFA", "CHGB", "S100A8", "ADAMTS5", "PPARG", "IL1R1", "S100A10", "PLSCR1", "EFEMP1", "TGFBR3", "EDN1", "TCF21", "IL6R", "CCL21", "THBS1", "ARNTL", "TGFBR2", "ITGA5", "SOCS1", "NGF", "NRIP1", "GNAO1", "GLA", "CXCL1", "AGTR1", "RAMP1", "ICAM3", "SERPINE1", "SDCBP", "IDH1", "ADAM11", "TGFBI", "CD276", "…
141	POSITIVE REGULATION OF HYDROLASE ACTIVITY%GO%GO:0051345	7.65791e-14	1.79336e-12	0.954542	0.357558	2.46848	251	c("CCL2", "CCL11", "ATF3", "S100A9", "PDGFRA", "NCKAP1L", "TSPYL2", "S100A8", "PPARG", "MYC", "PLEK", "PLSCR1", "ADCY3", "MYL4", "CCL21", "PRKAR2A", "PRKCD", "ATF4", "SELE", "NGF", "DDX3X", "AGTR1", "PREX1", "AXIN2", "TBC1D2", "RGS19", "TNFRSF10A", "ASNS", "C5AR1", "MTCH1", "RGS10", "SRPRB", "UHRF1", "GNA15", "MYL3", "SLC11A2", "RAP1GAP", "RGS1", "XBP1", "IFI27", "PLXNB1", "DNAJB9", "ADD1", "LPAR…
142	SRP-DEPENDENT COTRANSLATIONAL PROTEIN TARGETING TO MEMBRANE%GO%GO:0006614	8.75095e-14	2.03491e-12	0.954542	0.49194	2.96674	94	c("SSR3", "RPS27", "RPN1", "SRPRB", "SPCS3", "RPLP0", "RPS19", "RPN2", "RPL34", "RPL27A", "RPS5", "RPL29", "RPL18", "RPS18", "SEC11C", "SPCS2", "RPL24", "RPL13", "SSR4", "RPS17", "RPS3", "RPL35", "SEC61B", "RPS15A", "RPS2", "DDOST", "RPS28", "RPSA", "RPL41", "RPLP2", "RPL18A", "RPS10", "RPL12", "RPS9", "RPL36A", "SSR1", "RPS6", "RPL21", "TRAM1", "RPL28", "RPL26", "RPS12", "SRP72", "RPL37A", "SSR2…
143	GOLGI APPARATUS%GO%GO:0005794	1.06557e-13	2.4605e-12	0.954542	0.320505	2.27868	361	c("QSOX1", "SLC1A5", "FGD2", "ATP1A1", "CHST7", "CHPT1", "ZDHHC9", "SLC9A7", "SRGN", "CHST9", "PLSCR1", "ABCG1", "NGF", "HLA-DRA", "SLC39A14", "GLA", "LARP6", "CD44", "TMED3", "CHSY1", "LITAF", "RGS19", "ST3GAL1", "GGA1", "FABP6", "B2M", "TNFRSF1A", "UNC93B1", "FASN", "B4GALT6", "CSPG4", "NDFIP2", "TLR8", "SGMS2", "SCAMP2", "HYAL2", "MGAT4A", "WWC1", "CABP1", "HS3ST2", "NCALD", "PSAP", "ABCB6", "…
144	REGULATION OF INTRACELLULAR PROTEIN KINASE CASCADE%GO%GO:0010627	1.12021e-13	2.56871e-12	0.954542	0.338823	2.36938	307	c("BMP7", "FPR1", "BIRC3", "SYK", "PDGFRA", "TGFA", "CCR1", "MYC", "CSF1R", "HCLS1", "TLR4", "HMOX1", "DDIT4", "EDN1", "TLR2", "MAP3K6", "AKR1C2", "IL6R", "CCL21", "IRAK1", "THBS1", "PRKCD", "DUSP2", "SOCS1", "NOD2", "NGF", "DUSP1", "CD44", "SDCBP", "GADD45B", "LITAF", "C5AR1", "LTBR", "RNF41", "TNFRSF1A", "BCL3", "IL10", "NDFIP2", "SPHK1", "NF2", "WNT5A", "IRAK3", "HYAL2", "WWC1", "LPAR1", "HIPK…
145	CYTOPLASMIC VESICLE PART%GO%GO:0044433	1.16012e-13	2.62641e-12	0.943632	0.443583	2.81857	126	c("APOB", "CFD", "F13A1", "F5", "SLC11A1", "SRGN", "F8", "CYBB", "SERPINA1", "CYBA", "THBS1", "VAMP8", "HLA-DRA", "ALDOA", "MCFD2", "SERPINE1", "TMED3", "B2M", "NOSTRIN", "PICALM", "CLTC", "TIMP1", "ECE2", "ANXA3", "NCALD", "CD63", "CD74", "HLA-DPA1", "GPR89B", "SERPING1", "SEC24D", "CAV1", "VWF", "FN1", "AP1B1", "HLA-DRB4", "TMED2", "ITGB3", "HLA-E", "LTF", "GPR89A", "ATP6V0A2", "ICA1", "HLA-DPB…
146	IMMUNE RESPONSE-REGULATING SIGNALING PATHWAY%GO%GO:0002764	1.16128e-13	2.62641e-12	0.943632	0.450098	2.847	123	c("SYK", "WAS", "NCKAP1L", "CD38", "TLR4", "TLR2", "BTK", "MARCO", "IRAK1", "NOD2", "HLA-DRA", "LY96", "FGR", "C5AR1", "CD4", "UNC93B1", "RPS6KA2", "IRAK3", "CLEC7A", "LILRB2", "PIK3AP1", "HLA-DPA1", "MALT1", "MAP2K1", "RIPK2", "PTEN", "NFKBIA", "NFKBIB", "TRIM5", "ITCH", "LCP2", "HLA-DRB4", "CD14", "MNDA", "RPS6KA1", "RIPK1", "CTSH", "PAK2", "MAPKAPK3", "HLA-DPB1", "IRAK4", "MYD88", "MAP2K4", "L…
147	NUCLEOTIDE BINDING%GO%GO:0000166	1.17486e-13	2.63903e-12	0.943632	0.376621	2.55208	208	c("BLM", "TUBA3D", "HK3", "PIM1", "WNK3", "PDE4D", "CYBB", "ACVRL1", "BTK", "ABCG1", "MAP3K6", "G6PD", "GALK1", "GNL3", "NME1", "WNK1", "RUNX3", "STK17B", "CDK6", "PAPOLA", "UHRF1", "RAB8B", "GNA15", "SPHK1", "P2RX5", "PMVK", "PDK4", "IRAK3", "DPYD", "ABCB6", "PNPLA8", "TAP1", "NME1-NME2", "FBP1", "PDE2A", "ABCD3", "RHOB", "PYGL", "RAB8A", "GNL2", "NCF1", "MSH6", "PDE11A", "NEK6", "MYO1B", "UHMK1…
148	ANTIGEN PROCESSING AND PRESENTATION OF PEPTIDE ANTIGEN%GO%GO:0048002	1.34551e-13	3.00194e-12	0.943632	0.470479	2.90356	106	c("IFI30", "SLC11A1", "CD209", "CYBB", "CYBA", "HLA-DMA", "HLA-DRA", "HLA-DMB", "SEC61A1", "CTSS", "PSME2", "B2M", "PSMD8", "CLTC", "PSMB8", "CD74", "HLA-DPA1", "TAP1", "LGMN", "NCF4", "NCF1", "SEC24D", "PSME4", "SEC61B", "AP1B1", "HLA-DRB4", "PSMA4", "HLA-E", "PSME1", "PSMA6", "HLA-DPB1", "AP2S1", "PSMB6", "KIF2A", "ERAP2", "CENPE", "CALR", "PSMD14", "PSMA3", "HLA-A", "PSMD2", "TAP2", "AP1G1", "…
149	TOLL-LIKE RECEPTORS CASCADES%REACTOME%REACT_6966.10	2.05027e-13	4.54362e-12	0.943632	0.498751	2.98258	88	c("BIRC3", "CTSB", "TLR4", "TLR2", "BTK", "IL6R", "IRAK1", "ITGAM", "NOD2", "CTSS", "LY86", "LY96", "UNC93B1", "TLR8", "RPS6KA2", "ITGB2", "IRAK3", "JAK1", "UBE2D3", "MAP2K1", "S100A12", "RIPK2", "LGMN", "PPP2CB", "NFKBIA", "NFKBIB", "CD14", "RPS6KA1", "RIPK1", "MAPKAPK3", "HSP90B1", "IRAK4", "MYD88", "RIPK3", "MAP2K4", "NFKB1", "ELK1", "DUSP7", "FADD", "CNPY3", "TLR5", "TICAM2", "TLR6", "CHUK", …
150	NUCLEOBASE-CONTAINING COMPOUND CATABOLIC PROCESS%GO%GO:0034655	2.25149e-13	4.95628e-12	0.943632	0.347055	2.40582	264	c("MYH6", "BLM", "PDE4D", "RNASE6", "ISG20", "APOBEC2", "RHOD", "ADA", "GNL3", "RPS27", "EIF4G1", "DDX3X", "EIF5", "HSPA1B", "RAB8B", "RAP1GAP", "EIF4A1", "RPLP0", "RPS19", "ZFP36", "ACLY", "RNASE2", "EFTUD2", "DPYD", "EXOSC4", "RPL34", "TNKS1BP1", "RPL27A", "GPX1", "RPS5", "PDE2A", "ABCD3", "RPL29", "RHOB", "RPL18", "RPS18", "ATL3", "GNL2", "NCF1", "MSH6", "RPL24", "RPL13", "ETF1", "RPS17", "RPS…
151	CYTOKINE-MEDIATED SIGNALING PATHWAY%GO%GO:0019221	2.43941e-13	5.33438e-12	0.932595	0.407877	2.67515	160	c("CCL2", "SOCS3", "IFI30", "OSMR", "PLP2", "IRF8", "IL15RA", "ISG20", "CCR1", "LRP8", "STAT3", "CSF1R", "IL1R1", "IL6R", "IRAK1", "IFITM2", "PRKCD", "SOCS1", "HLA-DRA", "EIF4G1", "EBI3", "CD44", "IRF1", "KPNA2", "B2M", "IL17RB", "TNFRSF1A", "EIF4A1", "IRAK3", "IFI27", "IFNGR1", "MT2A", "IFITM1", "PSMB8", "GBP1", "IL4R", "LIFR", "HLA-DPA1", "JAK1", "PYCARD", "IFITM3", "TXNDC17", "GBP2", "NUP205",…
152	ENDOSOME%GO%GO:0005768	2.54436e-13	5.52729e-12	0.932595	0.383878	2.57024	187	c("APOB", "FPR1", "CTSB", "SLC11A1", "SLC9A7", "TLR4", "SLC9A9", "ABCG1", "TFRC", "IRAK1", "VAMP8", "NGF", "HLA-DRA", "CTSS", "LY96", "CDK2", "CD4", "B2M", "UNC93B1", "NGFR", "STEAP3", "TLR8", "SLC11A2", "SCAMP2", "NF2", "GRB2", "SNX10", "DNER", "CD63", "MAL", "SYTL4", "MAP2K1", "SLC30A3", "RHOB", "CLIP1", "EHD1", "CLCN3", "VPS29", "CAV1", "USP10", "TMBIM1", "HLA-DRB4", "CD14", "HLA-E", "OCRL", "…
153	ORGAN DEVELOPMENT%GO%GO:0048513	2.58097e-13	5.57017e-12	0.932595	0.29642	2.12942	441	c("CCL2", "MYH6", "BMP7", "NAMPT", "ATP2A2", "FGF7", "ANKRD2", "SYK", "KLHL3", "FAIM2", "WAS", "PDGFRA", "FGF12", "NCKAP1L", "MAFB", "OSR1", "HEY2", "PDPN", "HAS2", "PPARG", "LRP8", "STAT3", "CSF1R", "HCLS1", "PLEK", "AGTPBP1", "DDIT4", "ACVRL1", "TGFBR3", "MYL4", "HIF1A", "TCF21", "IL6R", "TGFBR2", "ITGA11", "G6PD", "FABP5", "FBN2", "CLIC4", "RORB", "AGTR1", "AXIN2", "CD44", "LRRC8A", "ITGA2", "…
154	ANTIGEN PROCESSING AND PRESENTATION%GO%GO:0019882	2.85147e-13	6.114e-12	0.932595	0.466152	2.88913	108	c("IFI30", "SLC11A1", "CD209", "CYBB", "CYBA", "HLA-DMA", "HLA-DRA", "HLA-DMB", "SEC61A1", "CTSS", "PSME2", "B2M", "PSMD8", "CLTC", "PSMB8", "CD74", "HLA-DPA1", "TAP1", "LGMN", "NCF4", "NCF1", "SEC24D", "PSME4", "SEC61B", "AP1B1", "HLA-DRB4", "PSMA4", "HLA-E", "PSME1", "PSMA6", "CTSH", "HLA-DPB1", "AP2S1", "PSMB6", "KIF2A", "ERAP2", "CENPE", "CALR", "PSMD14", "PSMA3", "HLA-A", "PSMD2", "TAP2", "A…
155	ORGANIC CYCLIC COMPOUND CATABOLIC PROCESS%GO%GO:1901361	2.87384e-13	6.1222e-12	0.932595	0.336714	2.34755	291	c("MYH6", "BLM", "PDE4D", "RNASE6", "ISG20", "APOBEC2", "CEL", "RHOD", "HMOX1", "ADA", "GNL3", "RPS27", "EIF4G1", "DDX3X", "EIF5", "HSPA1B", "RAB8B", "RAP1GAP", "EIF4A1", "RPLP0", "HSD17B11", "RPS19", "ZFP36", "ACLY", "RNASE2", "EFTUD2", "DPYD", "EXOSC4", "RPL34", "TNKS1BP1", "RPL27A", "GPX1", "RPS5", "PDE2A", "ABCD3", "RPL29", "RHOB", "RPL18", "RPS18", "ATL3", "GNL2", "NCF1", "MSH6", "YWHAH", "R…
156	Osteoclast differentiation%KEGG%hsa04380	3.11528e-13	6.594e-12	0.932595	0.499811	2.97151	84	c("SOCS3", "SYK", "LILRB5", "TYROBP", "PPARG", "CSF1R", "IL1R1", "CYBB", "PPP3CC", "BTK", "CYBA", "TGFBR2", "PIK3R3", "SOCS1", "LILRB3", "SPI1", "FOSL1", "TNFRSF1A", "GRB2", "FCGR2A", "IFNGR1", "FCGR2B", "LILRB2", "LILRA2", "JAK1", "MAP2K1", "NCF4", "LILRB4", "MAPK13", "NCF1", "NFKBIA", "PIK3R5", "FOSL2", "LCP2", "CSF1", "ITGB3", "NFKB1", "TNFRSF11B", "ACP5", "CHUK", "JUN", "RELA", "LILRB1", "NCF…
157	GENE EXPRESSION%REACTOME%REACT_71.5	3.20332e-13	6.73717e-12	0.932595	0.295246	2.13922	488	c("EIF4EBP1", "PPARG", "MYC", "SSR3", "TGIF1", "PRKCD", "RPS27", "E2F5", "NR4A2", "RPN1", "TEAD2", "TNPO1", "EIF4G1", "SEC61A1", "RORB", "SERPINE1", "EIF5", "ZNF703", "ESRRG", "PRKRA", "PSME2", "SNRPB", "PSMD8", "PPA2", "PAPOLA", "SRPRB", "HSPA1B", "SPCS3", "EIF4A1", "ZNF682", "EEF1E1", "RPLP0", "DDX23", "RPS19", "ZFP36", "PSMB8", "EFTUD2", "RPN2", "EXOSC4", "RARA", "RPL34", "PRPF4", "UBE2D3", "E…
158	CARBOXYLIC ACID METABOLIC PROCESS%GO%GO:0019752	3.42297e-13	7.15358e-12	0.932595	0.342895	2.38501	277	c("LPCAT3", "SLC2A1", "PLA2G2A", "SLC2A3", "LDHA", "PTDSS1", "GGT5", "GLRX2", "GNMT", "CBS", "AASS", "BCAT1", "CEL", "PLSCR1", "ALOX5", "GPT2", "EDN1", "GLUL", "SHMT1", "AKR1C2", "P4HB", "SLC7A8", "TST", "G6PD", "SLC6A6", "TBXAS1", "ATF4", "ALOX5AP", "ABCC3", "GCAT", "IDH1", "PTGIS", "FABP6", "ASNS", "PPA2", "LPCAT4", "CKB", "FASN", "CSPG4", "CNDP2", "NPL", "ACSL5", "GCLM", "EEF1E1", "PDK4", "UGP…
159	EXTRACELLULAR SPACE%GO%GO:0005615	3.71585e-13	7.66858e-12	0.932595	0.368335	2.51931	223	c("BMP7", "LMCD1", "QSOX1", "APOB", "PLA2G2A", "SPOCK1", "FGF12", "TGFA", "CTSB", "ANGPTL4", "SRGN", "TFPI", "CEL", "PVR", "HMOX1", "PLAU", "EFEMP1", "TGFBR3", "EDN1", "SERPINA1", "TCN2", "IL6R", "THBS1", "GPX3", "SELE", "SERPINE1", "C1QA", "PTGIS", "C1QB", "MERTK", "AXL", "TNFRSF1A", "LYZ", "SPP1", "FGL2", "FSTL1", "IL10", "MMP2", "WNT5A", "FBLN1", "ANGPT2", "SERPINB1", "LILRB2", "C2", "PSAP", "…
160	POSITIVE REGULATION OF BIOSYNTHETIC PROCESS%GO%GO:0009891	3.71585e-13	7.66858e-12	0.932595	0.300523	2.16496	452	c("CCL2", "BMP7", "NAMPT", "BLM", "MID1IP1", "PDGFRA", "CD38", "OSR1", "HEY2", "SLC11A1", "SREBF1", "PPARG", "MYC", "STAT3", "HCLS1", "TLR4", "HMOX1", "PLSCR1", "SEC14L2", "ACVRL1", "TFE3", "EDN1", "TLR2", "CD86", "ABCG1", "HIF1A", "TCF21", "CCL21", "IRAK1", "THBS1", "ARNTL", "PRKCD", "ATF4", "E2F5", "NOD2", "NRIP1", "DAB2", "DDX3X", "RORB", "TESC", "SPI1", "RAMP1", "SERPINE1", "EBI3", "PID1", "E…
161	PURINE NUCLEOTIDE BINDING%GO%GO:0017076	3.78942e-13	7.72388e-12	0.932595	0.391743	2.60432	176	c("BLM", "TUBA3D", "HK3", "PIM1", "WNK3", "PDE4D", "ACVRL1", "BTK", "ABCG1", "MAP3K6", "GALK1", "GNL3", "NME1", "WNK1", "RUNX3", "STK17B", "CDK6", "PAPOLA", "RAB8B", "GNA15", "SPHK1", "P2RX5", "PMVK", "PDK4", "IRAK3", "ABCB6", "PNPLA8", "TAP1", "NME1-NME2", "FBP1", "PDE2A", "ABCD3", "RHOB", "PYGL", "RAB8A", "GNL2", "NCF1", "MSH6", "PDE11A", "NEK6", "MYO1B", "UHMK1", "OXSR1", "HSP90AA1", "PDXK", "…
162	RESPONSE TO OTHER ORGANISM%GO%GO:0051707	3.78942e-13	7.72388e-12	0.932595	0.394882	2.61449	170	c("CCL2", "APOB", "CCL11", "PLA2G2A", "S100A9", "SYK", "ENO1", "SLC11A1", "S100A8", "ISG20", "TLR4", "PLSCR1", "TLR2", "SAMHD1", "IL6R", "IRAK1", "IFITM2", "PRKCD", "SELE", "STAB1", "NOD2", "DDX3X", "SERPINE1", "LY96", "DCLK1", "PRKRA", "IRF1", "FOSL1", "FGR", "AXL", "BCL3", "CDK6", "IL10", "TLR8", "WNT5A", "IRAK3", "CLEC7A", "ANXA3", "HYAL2", "IFNGR1", "LILRB2", "IFITM1", "BATF3", "EXOSC4", "CXC…
163	POSITIVE REGULATION OF MACROMOLECULE BIOSYNTHETIC PROCESS%GO%GO:0010557	4.2309e-13	8.57081e-12	0.932595	0.306633	2.1957	413	c("CCL2", "BMP7", "NAMPT", "BLM", "PDGFRA", "CD38", "OSR1", "HEY2", "SLC11A1", "SREBF1", "PPARG", "MYC", "STAT3", "HCLS1", "TLR4", "HMOX1", "PLSCR1", "SEC14L2", "ACVRL1", "TFE3", "EDN1", "TLR2", "CD86", "HIF1A", "TCF21", "CCL21", "IRAK1", "THBS1", "ARNTL", "ATF4", "E2F5", "NOD2", "NRIP1", "DAB2", "DDX3X", "RORB", "TESC", "SPI1", "RAMP1", "SERPINE1", "EBI3", "PID1", "ESRRG", "IRF1", "CD276", "CD4"…
164	PURINE RIBONUCLEOTIDE BINDING%GO%GO:0032555	4.96669e-13	1e-11	0.921426	0.395504	2.62642	175	c("BLM", "TUBA3D", "HK3", "PIM1", "WNK3", "PDE4D", "ACVRL1", "BTK", "ABCG1", "MAP3K6", "GALK1", "GNL3", "NME1", "WNK1", "RUNX3", "STK17B", "CDK6", "PAPOLA", "RAB8B", "GNA15", "SPHK1", "P2RX5", "PMVK", "PDK4", "IRAK3", "ABCB6", "PNPLA8", "TAP1", "NME1-NME2", "FBP1", "PDE2A", "ABCD3", "RHOB", "PYGL", "RAB8A", "GNL2", "NCF1", "MSH6", "PDE11A", "NEK6", "MYO1B", "UHMK1", "OXSR1", "HSP90AA1", "PDXK", "…
165	PURINE NUCLEOSIDE BINDING%GO%GO:0001883	5.70248e-13	1.12752e-11	0.921426	0.392605	2.59942	170	c("BLM", "TUBA3D", "HK3", "PIM1", "WNK3", "ACVRL1", "BTK", "ABCG1", "MAP3K6", "GALK1", "GNL3", "NME1", "WNK1", "RUNX3", "STK17B", "CDK6", "PAPOLA", "RAB8B", "GNA15", "SPHK1", "P2RX5", "PMVK", "PDK4", "IRAK3", "ABCB6", "PNPLA8", "TAP1", "NME1-NME2", "FBP1", "ABCD3", "RHOB", "PYGL", "RAB8A", "GNL2", "NCF1", "MSH6", "NEK6", "MYO1B", "UHMK1", "OXSR1", "HSP90AA1", "PDXK", "RAB5A", "SRPK1", "ADSS", "DM…
166	PURINE RIBONUCLEOSIDE BINDING%GO%GO:0032550	5.70248e-13	1.12752e-11	0.921426	0.392605	2.59942	170	c("BLM", "TUBA3D", "HK3", "PIM1", "WNK3", "ACVRL1", "BTK", "ABCG1", "MAP3K6", "GALK1", "GNL3", "NME1", "WNK1", "RUNX3", "STK17B", "CDK6", "PAPOLA", "RAB8B", "GNA15", "SPHK1", "P2RX5", "PMVK", "PDK4", "IRAK3", "ABCB6", "PNPLA8", "TAP1", "NME1-NME2", "FBP1", "ABCD3", "RHOB", "PYGL", "RAB8A", "GNL2", "NCF1", "MSH6", "NEK6", "MYO1B", "UHMK1", "OXSR1", "HSP90AA1", "PDXK", "RAB5A", "SRPK1", "ADSS", "DM…
167	RIBONUCLEOSIDE BINDING%GO%GO:0032549	5.70248e-13	1.12752e-11	0.921426	0.392605	2.59942	170	c("BLM", "TUBA3D", "HK3", "PIM1", "WNK3", "ACVRL1", "BTK", "ABCG1", "MAP3K6", "GALK1", "GNL3", "NME1", "WNK1", "RUNX3", "STK17B", "CDK6", "PAPOLA", "RAB8B", "GNA15", "SPHK1", "P2RX5", "PMVK", "PDK4", "IRAK3", "ABCB6", "PNPLA8", "TAP1", "NME1-NME2", "FBP1", "ABCD3", "RHOB", "PYGL", "RAB8A", "GNL2", "NCF1", "MSH6", "NEK6", "MYO1B", "UHMK1", "OXSR1", "HSP90AA1", "PDXK", "RAB5A", "SRPK1", "ADSS", "DM…
168	NEGATIVE REGULATION OF CELLULAR PROTEIN METABOLIC PROCESS%GO%GO:0032269	6.51186e-13	1.27989e-11	0.921426	0.376418	2.52607	191	c("BMP7", "SOCS3", "SAMSN1", "DDIT4", "EDN1", "TIMP3", "G6PD", "PRKCD", "DUSP2", "SOCS1", "DDX3X", "SPI1", "DUSP1", "PID1", "PSME2", "PSMD8", "MVP", "IL10", "TIMP1", "DBNDD2", "NF2", "IRAK3", "HYAL2", "ZFP36", "PSMB8", "ERRFI1", "PYCARD", "GMFG", "PTEN", "RGS2", "EDNRB", "FURIN", "DNAJC3", "CAV1", "GSTP1", "BTG2", "GMFB", "PSMA4", "PSME1", "DUSP5", "PSMA6", "PAK2", "PSMB6", "LYN", "NFKB1", "DNAJC…
169	METABOLISM OF MRNA%REACTOME%REACT_20605.3	6.96725e-13	1.36129e-11	0.921426	0.411785	2.692	155	c("PRKCD", "RPS27", "TNPO1", "EIF4G1", "PSME2", "PSMD8", "HSPA1B", "EIF4A1", "RPLP0", "RPS19", "ZFP36", "PSMB8", "EXOSC4", "RPL34", "TNKS1BP1", "RPL27A", "RPS5", "RPL29", "RPL18", "RPS18", "RPL24", "RPL13", "ETF1", "RPS17", "RPS3", "RPL35", "PSME4", "RPS15A", "PSMA4", "RPS2", "LSM6", "MAGOH", "PSME1", "RPS28", "PSMA6", "RPSA", "YWHAZ", "RPL41", "RPLP2", "RPL18A", "RPS10", "RPL12", "PSMB6", "RPS9"…
170	IMMUNE RESPONSE-ACTIVATING SIGNAL TRANSDUCTION%GO%GO:0002757	7.13614e-13	1.38609e-11	0.921426	0.445608	2.78952	117	c("SYK", "WAS", "NCKAP1L", "CD38", "TLR4", "TLR2", "BTK", "MARCO", "IRAK1", "NOD2", "HLA-DRA", "LY96", "C5AR1", "CD4", "UNC93B1", "RPS6KA2", "IRAK3", "CLEC7A", "PIK3AP1", "HLA-DPA1", "MALT1", "MAP2K1", "RIPK2", "PTEN", "NFKBIA", "NFKBIB", "TRIM5", "ITCH", "LCP2", "HLA-DRB4", "CD14", "MNDA", "RPS6KA1", "RIPK1", "PAK2", "MAPKAPK3", "HLA-DPB1", "IRAK4", "MYD88", "MAP2K4", "LYN", "NFKB1", "HCK", "ELK…
171	Lysosome%KEGG%hsa04142	7.7009e-13	1.48704e-11	0.921426	0.518744	3.02101	74	c("CTSC", "CD68", "CTSB", "SLC11A1", "LAPTM5", "GLA", "CTSS", "LIPA", "GGA1", "CLTC", "SLC11A2", "MAN2B1", "PSAP", "CD63", "LGMN", "NPC2", "CTSG", "CTSZ", "NPC1", "AP1B1", "CTSH", "ATP6V0A2", "CD164", "SCARB2", "NAGA", "ATP6V0A1", "ACP5", "NAGLU", "TCIRG1", "GNS", "ATP6V0C", "GM2A", "AP1G1", "GGA2", "PPT1", "IGF2R", "MCOLN1", "GLB1", "M6PR", "CLTA", "CLTB", "AP3B1", "CTSA", "CLN3", "LAMP1", "ATP6…
172	CAP-DEPENDENT TRANSLATION INITIATION%REACTOME%REACT_2099.1	7.85043e-13	1.49839e-11	0.921426	0.471412	2.85469	96	c("EIF4EBP1", "RPS27", "EIF4G1", "EIF5", "EIF4A1", "RPLP0", "RPS19", "RPL34", "RPL27A", "RPS5", "RPL29", "RPL18", "RPS18", "RPL24", "RPL13", "RPS17", "RPS3", "RPL35", "EIF3B", "RPS15A", "RPS2", "EIF1AX", "RPS28", "RPSA", "RPL41", "RPLP2", "RPL18A", "RPS10", "RPL12", "EIF3J", "RPS9", "RPL36A", "RPS6", "RPL21", "RPL28", "RPL26", "RPS12", "RPL37A", "RPL38", "RPL10A", "EIF3I", "RPS15", "RPL17", "EIF2…
173	EUKARYOTIC TRANSLATION INITIATION%REACTOME%REACT_2159.5	7.85043e-13	1.49839e-11	0.921426	0.471412	2.85469	96	c("EIF4EBP1", "RPS27", "EIF4G1", "EIF5", "EIF4A1", "RPLP0", "RPS19", "RPL34", "RPL27A", "RPS5", "RPL29", "RPL18", "RPS18", "RPL24", "RPL13", "RPS17", "RPS3", "RPL35", "EIF3B", "RPS15A", "RPS2", "EIF1AX", "RPS28", "RPSA", "RPL41", "RPLP2", "RPL18A", "RPS10", "RPL12", "EIF3J", "RPS9", "RPL36A", "RPS6", "RPL21", "RPL28", "RPL26", "RPS12", "RPL37A", "RPL38", "RPL10A", "EIF3I", "RPS15", "RPL17", "EIF2…
174	POSITIVE REGULATION OF CELLULAR BIOSYNTHETIC PROCESS%GO%GO:0031328	7.91204e-13	1.50147e-11	0.921426	0.301656	2.16931	444	c("BMP7", "NAMPT", "BLM", "MID1IP1", "PDGFRA", "CD38", "OSR1", "HEY2", "SLC11A1", "SREBF1", "PPARG", "MYC", "STAT3", "HCLS1", "TLR4", "HMOX1", "PLSCR1", "SEC14L2", "ACVRL1", "TFE3", "EDN1", "TLR2", "CD86", "HIF1A", "TCF21", "CCL21", "IRAK1", "THBS1", "ARNTL", "PRKCD", "ATF4", "E2F5", "NRIP1", "DAB2", "DDX3X", "RORB", "TESC", "SPI1", "RAMP1", "SERPINE1", "EBI3", "PID1", "ESRRG", "IRF1", "CD276", "…
175	Tuberculosis%KEGG%hsa05152	8.10039e-13	1.52843e-11	0.921426	0.45936	2.83494	106	c("C3", "SYK", "FCER1G", "CD209", "TLR4", "PPP3CC", "TLR2", "HLA-DMA", "IRAK1", "ITGAM", "NOD2", "HLA-DRA", "HLA-DMB", "CTSS", "LTBR", "TNFRSF1A", "IL10", "SPHK1", "ITGB2", "CLEC7A", "CORO1A", "FCGR2A", "IFNGR1", "BID", "FCGR2B", "CD74", "HLA-DPA1", "JAK1", "MALT1", "RIPK2", "BAD", "IL10RA", "MAPK13", "CEBPG", "TLR1", "HLA-DRB4", "CD14", "ATP6V0A2", "RAB5A", "HLA-DPB1", "IRAK4", "MYD88", "NFKB1",…
176	ANTIGEN PROCESSING AND PRESENTATION OF EXOGENOUS ANTIGEN%GO%GO:0019884	8.37242e-13	1.56191e-11	0.921426	0.468798	2.8781	101	c("IFI30", "CYBB", "CYBA", "HLA-DMA", "HLA-DRA", "HLA-DMB", "SEC61A1", "CTSS", "PSME2", "B2M", "PSMD8", "CLTC", "PSMB8", "CD74", "HLA-DPA1", "TAP1", "LGMN", "NCF4", "NCF1", "SEC24D", "PSME4", "SEC61B", "AP1B1", "HLA-DRB4", "PSMA4", "HLA-E", "PSME1", "PSMA6", "HLA-DPB1", "AP2S1", "PSMB6", "KIF2A", "CENPE", "CALR", "PSMD14", "PSMA3", "HLA-A", "PSMD2", "TAP2", "AP1G1", "PSMA5", "PSMD12", "NCF2", "HL…
177	ANTIGEN PROCESSING AND PRESENTATION OF EXOGENOUS PEPTIDE ANTIGEN%GO%GO:0002478	8.37242e-13	1.56191e-11	0.921426	0.468798	2.8781	101	c("IFI30", "CYBB", "CYBA", "HLA-DMA", "HLA-DRA", "HLA-DMB", "SEC61A1", "CTSS", "PSME2", "B2M", "PSMD8", "CLTC", "PSMB8", "CD74", "HLA-DPA1", "TAP1", "LGMN", "NCF4", "NCF1", "SEC24D", "PSME4", "SEC61B", "AP1B1", "HLA-DRB4", "PSMA4", "HLA-E", "PSME1", "PSMA6", "HLA-DPB1", "AP2S1", "PSMB6", "KIF2A", "CENPE", "CALR", "PSMD14", "PSMA3", "HLA-A", "PSMD2", "TAP2", "AP1G1", "PSMA5", "PSMD12", "NCF2", "HL…
178	RESPONSE TO ENDOGENOUS STIMULUS%GO%GO:0009719	8.94723e-13	1.65976e-11	0.921426	0.330588	2.31068	304	c("CCL2", "BMP7", "NAMPT", "SOCS3", "FGF7", "EIF4EBP1", "FGF12", "CTSB", "HAS2", "PPARG", "MYC", "STAT3", "HCLS1", "HMOX1", "ADCY3", "ACVRL1", "TGFBR3", "ABCG1", "AQP9", "AKR1C2", "CCL21", "TGIF1", "THBS1", "PRKAR2A", "TGFBR2", "PRKCD", "E2F5", "SOCS1", "NOD2", "EIF4G1", "CTSS", "MYO5A", "SERPINE1", "CD44", "IL10", "SNAI2", "PPP1CC", "PDK4", "WNT5A", "GRB2", "IRAK3", "HYAL2", "GNG12", "NKX3-1", "…
179	POSITIVE REGULATION OF NITROGEN COMPOUND METABOLIC PROCESS%GO%GO:0051173	9.243e-13	1.70505e-11	0.91012	0.300697	2.15576	425	c("BMP7", "NAMPT", "BLM", "PDGFRA", "CD38", "OSR1", "HEY2", "SLC11A1", "SREBF1", "PPARG", "MYC", "STAT3", "HCLS1", "TLR4", "PLSCR1", "SEC14L2", "ACVRL1", "TFE3", "EDN1", "TLR2", "CD86", "HIF1A", "TCF21", "IRAK1", "ARNTL", "PRKCD", "ATF4", "E2F5", "NRIP1", "DAB2", "DDX3X", "RORB", "TESC", "SPI1", "RAMP1", "SERPINE1", "PID1", "ESRRG", "IRF1", "TNFRSF1A", "BCL3", "IL10", "ZBTB16", "PICALM", "UHRF1",…
180	NEGATIVE REGULATION OF CELL DEATH%GO%GO:0060548	9.39089e-13	1.72271e-11	0.91012	0.360591	2.4582	218	c("CCL2", "BMP7", "SOCS3", "BIRC3", "FAIM2", "NCKAP1L", "CD38", "OSR1", "PIM1", "ANGPTL4", "TNFAIP8", "WNK3", "BCL6", "MYC", "HCLS1", "HMOX1", "GRK5", "IL6R", "CCL21", "THBS1", "PRKCD", "ITGA5", "NOD2", "DAB2", "DDX3X", "SERPINE1", "CD44", "BCL2L1", "ASNS", "AXL", "BCL3", "IL10", "SNAI2", "HSPA1B", "TYRO3", "SPHK1", "PDK4", "WNT5A", "SOD2", "HTATIP2", "AVEN", "SH3GLB1", "CD74", "ANXA5", "SOX11", …
181	TRANSLATION%GO%GO:0006412	9.83454e-13	1.79413e-11	0.91012	0.389096	2.59235	180	c("EIF4EBP1", "SSR3", "RPS27", "RPN1", "EIF4G1", "EIF5", "PPA2", "RRBP1", "SRPRB", "SPCS3", "EIF4A1", "EEF1E1", "RPLP0", "RPS19", "RPN2", "RPL34", "SOX11", "MRPL36", "RPL27A", "RPS5", "RPL29", "PPA1", "RPL18", "RPS18", "SEC11C", "SPCS2", "RPL24", "RPS6KB2", "RPL13", "ETF1", "SSR4", "RPS17", "RPS3", "RPL35", "SEC61B", "EIF3B", "MRPS24", "FARSB", "RPS15A", "EEF2K", "EIF3M", "MRPL41", "RPS2", "EIF1A…
182	AROMATIC COMPOUND CATABOLIC PROCESS%GO%GO:0019439	1.10176e-12	1.99891e-11	0.91012	0.333857	2.32294	280	c("MYH6", "BLM", "PDE4D", "RNASE6", "ISG20", "APOBEC2", "RHOD", "HMOX1", "ADA", "GNL3", "RPS27", "EIF4G1", "DDX3X", "EIF5", "HSPA1B", "RAB8B", "RAP1GAP", "EIF4A1", "RPLP0", "RPS19", "ZFP36", "ACLY", "RNASE2", "EFTUD2", "DPYD", "EXOSC4", "RPL34", "TNKS1BP1", "RPL27A", "GPX1", "RPS5", "PDE2A", "ABCD3", "RPL29", "RHOB", "RPL18", "RPS18", "ATL3", "GNL2", "NCF1", "MSH6", "RPL24", "RPL13", "ETF1", "RPS…
183	NUCLEOSIDE BINDING%GO%GO:0001882	1.17571e-12	2.12141e-11	0.91012	0.386456	2.56442	173	c("BLM", "TUBA3D", "HK3", "PIM1", "WNK3", "ACVRL1", "BTK", "ABCG1", "MAP3K6", "GALK1", "GNL3", "NME1", "WNK1", "RUNX3", "STK17B", "CDK6", "PAPOLA", "RAB8B", "GNA15", "SPHK1", "P2RX5", "PMVK", "PDK4", "IRAK3", "ABCB6", "PNPLA8", "TAP1", "NME1-NME2", "FBP1", "ABCD3", "RHOB", "PYGL", "RAB8A", "GNL2", "NCF1", "MSH6", "NEK6", "MYO1B", "UHMK1", "OXSR1", "HSP90AA1", "PDXK", "RAB5A", "SRPK1", "ADSS", "DM…
184	CARBOHYDRATE METABOLIC PROCESS%GO%GO:0005975	1.23486e-12	2.21604e-11	0.91012	0.338835	2.35411	274	c("HK2", "GFPT2", "SLC2A1", "SLC2A3", "HK3", "LDHA", "CHST7", "SLC5A1", "ENO1", "LYVE1", "ALG3", "NANS", "CHST9", "UAP1", "MPDU1", "G6PD", "TKT", "GALK1", "ATF4", "IMPA2", "RPN1", "ALDOA", "SLC2A5", "MCFD2", "GLA", "MAGT1", "CD44", "CHSY1", "ST3GAL1", "EDEM2", "GNPNAT1", "B4GALT6", "CSPG4", "SLC25A13", "UGP2", "HYAL2", "MGAT4A", "PGD", "IDH2", "HS3ST2", "PMM2", "RPN2", "GPT", "ALG8", "PFKFB3", "M…
185	NEGATIVE REGULATION OF APOPTOTIC PROCESS%GO%GO:0043066	1.3088e-12	2.33604e-11	0.91012	0.361712	2.45334	211	c("CCL2", "BMP7", "SOCS3", "BIRC3", "FAIM2", "NCKAP1L", "CD38", "OSR1", "PIM1", "ANGPTL4", "TNFAIP8", "WNK3", "BCL6", "MYC", "HCLS1", "HMOX1", "GRK5", "IL6R", "CCL21", "THBS1", "PRKCD", "ITGA5", "NOD2", "DAB2", "DDX3X", "SERPINE1", "CD44", "BCL2L1", "ASNS", "AXL", "BCL3", "IL10", "SNAI2", "HSPA1B", "TYRO3", "SPHK1", "PDK4", "WNT5A", "SOD2", "HTATIP2", "AVEN", "SH3GLB1", "CD74", "ANXA5", "MALT1", …
186	POSITIVE REGULATION OF NUCLEOBASE-CONTAINING COMPOUND METABOLIC PROCESS%GO%GO:0045935	1.36796e-12	2.42849e-11	0.91012	0.29869	2.13808	415	c("BMP7", "NAMPT", "BLM", "PDGFRA", "CD38", "OSR1", "HEY2", "SLC11A1", "SREBF1", "PPARG", "MYC", "STAT3", "HCLS1", "TLR4", "PLSCR1", "SEC14L2", "ACVRL1", "TFE3", "TLR2", "CD86", "HIF1A", "TCF21", "IRAK1", "ARNTL", "ATF4", "E2F5", "NRIP1", "DAB2", "DDX3X", "RORB", "TESC", "SPI1", "RAMP1", "SERPINE1", "PID1", "ESRRG", "IRF1", "TNFRSF1A", "BCL3", "IL10", "ZBTB16", "PICALM", "UHRF1", "HSF2", "HNRNPAB…
187	CELLULAR RESPONSE TO OXYGEN-CONTAINING COMPOUND%GO%GO:1901701	1.50105e-12	2.65052e-11	0.91012	0.369029	2.48606	197	c("CCL2", "NAMPT", "MGST1", "SOCS3", "FGF7", "EIF4EBP1", "PPARG", "STAT3", "TLR4", "ADCY3", "TLR2", "AQP9", "AKR1C2", "IRAK1", "PRKAR2A", "GPX3", "SOCS1", "EIF4G1", "MYO5A", "TESC", "SERPINE1", "LY96", "CDK2", "PID1", "AXL", "IL10", "PDK4", "WNT5A", "GRB2", "CLEC7A", "SOD2", "LILRB2", "GNG12", "AKR1C3", "ATP6V1A", "RARA", "PYCARD", "MAP2K1", "GPX1", "PDE2A", "RHOB", "CAB39L", "TNFRSF1B", "GSTP1",…
188	RESPONSE TO BIOTIC STIMULUS%GO%GO:0009607	1.64967e-12	2.89745e-11	0.91012	0.385425	2.56232	176	c("CCL2", "APOB", "CCL11", "PLA2G2A", "S100A9", "SYK", "ENO1", "SLC11A1", "S100A8", "ISG20", "TLR4", "PLSCR1", "TLR2", "SAMHD1", "IL6R", "IRAK1", "IFITM2", "PRKCD", "SELE", "STAB1", "NOD2", "DDX3X", "SERPINE1", "LY96", "DCLK1", "PRKRA", "IRF1", "FOSL1", "FGR", "AXL", "BCL3", "CDK6", "IL10", "TLR8", "WNT5A", "IRAK3", "CLEC7A", "ANXA3", "HYAL2", "IFNGR1", "LILRB2", "IFITM1", "BATF3", "EXOSC4", "CXC…
189	HETEROCYCLE CATABOLIC PROCESS%GO%GO:0046700	1.79828e-12	3.14176e-11	0.91012	0.336612	2.3418	278	c("MYH6", "BLM", "PDE4D", "RNASE6", "ISG20", "APOBEC2", "RHOD", "HMOX1", "ADA", "GNL3", "RPS27", "EIF4G1", "DDX3X", "EIF5", "HSPA1B", "RAB8B", "RAP1GAP", "EIF4A1", "RPLP0", "RPS19", "ZFP36", "ACLY", "RNASE2", "EFTUD2", "DPYD", "EXOSC4", "RPL34", "TNKS1BP1", "RPL27A", "GPX1", "RPS5", "PDE2A", "ABCD3", "RPL29", "RHOB", "RPL18", "RPS18", "ATL3", "GNL2", "NCF1", "MSH6", "RPL24", "RPL13", "ETF1", "RPS…
190	POSITIVE REGULATION OF GENE EXPRESSION%GO%GO:0010628	1.88745e-12	3.26955e-11	0.898671	0.312848	2.22239	354	c("BMP7", "NAMPT", "BLM", "CD38", "OSR1", "HEY2", "SLC11A1", "SREBF1", "PPARG", "MYC", "STAT3", "HCLS1", "TLR4", "PLSCR1", "SEC14L2", "ACVRL1", "TFE3", "TLR2", "CD86", "HIF1A", "TCF21", "IRAK1", "ARNTL", "ATF4", "E2F5", "NGF", "NRIP1", "DAB2", "DDX3X", "RORB", "TESC", "SPI1", "SERPINE1", "PID1", "ESRRG", "IRF1", "TNFRSF1A", "BCL3", "IL10", "ZBTB16", "PICALM", "UHRF1", "HSF2", "HNRNPAB", "NCOA7", …
191	PURINE RIBONUCLEOSIDE TRIPHOSPHATE BINDING%GO%GO:0035639	1.89123e-12	3.26955e-11	0.898671	0.401494	2.62866	159	c("BLM", "TUBA3D", "HK3", "PIM1", "WNK3", "ACVRL1", "BTK", "ABCG1", "MAP3K6", "GALK1", "GNL3", "NME1", "WNK1", "RUNX3", "STK17B", "CDK6", "PAPOLA", "GNA15", "SPHK1", "P2RX5", "PMVK", "PDK4", "IRAK3", "ABCB6", "PNPLA8", "TAP1", "NME1-NME2", "ABCD3", "RHOB", "PYGL", "RAB8A", "GNL2", "NCF1", "MSH6", "NEK6", "MYO1B", "UHMK1", "OXSR1", "HSP90AA1", "PSMA6", "PDXK", "RAB5A", "SRPK1", "ADSS", "DMPK", "ST…
192	TRANSMEMBRANE TRANSPORT%GO%GO:0055085	2.12524e-12	3.64696e-11	0.898671	0.35018	2.41093	247	c("HK2", "ATP2A2", "SLCO4A1", "SLC2A1", "ATP1B3", "ATP1B1", "SLC2A3", "SLC1A5", "HK3", "ATP1A1", "SLC5A1", "PLP2", "SLC11A1", "SLC9A7", "SLC38A1", "HMOX1", "EBP", "ADCY3", "SLC9A9", "SLC1A3", "SLC36A1", "AQP4", "SLC44A3", "ABCG1", "AQP9", "SLC38A2", "SCARA5", "TFRC", "SLC4A7", "PRKAR2A", "SLC7A8", "SLC39A8", "SLC6A6", "SLC4A3", "SLC29A2", "SLC2A5", "SLCO2A1", "SLC39A14", "ABCC3", "KCNH2", "ATP11C…
193	ESTABLISHMENT OF PROTEIN LOCALIZATION TO ORGANELLE%GO%GO:0072594	2.13163e-12	3.64696e-11	0.898671	0.421756	2.69717	131	c("SSR3", "RPS27", "RPN1", "SEC61A1", "SRPRB", "SPCS3", "RAB8B", "RPLP0", "RPS19", "RPN2", "RPL34", "RPL27A", "RPS5", "PDE2A", "RPL29", "RPL18", "RPS18", "SEC11C", "SPCS2", "RPL24", "RPL13", "SSR4", "RPS17", "RPS3", "RPL35", "SEC61B", "RPS15A", "RPS2", "DDOST", "HSP90AA1", "RPS28", "RPSA", "RPL41", "RPLP2", "RPL18A", "RPS10", "SCARB2", "RPL12", "GRPEL1", "RPS9", "RPL36A", "SSR1", "RPS6", "RPL21",…
194	REGULATION OF MULTICELLULAR ORGANISMAL DEVELOPMENT%GO%GO:2000026	2.15496e-12	3.66788e-11	0.898671	0.320838	2.26211	328	c("BMP7", "FGF7", "SPOCK1", "MEIS1", "NCKAP1L", "VASH2", "MAFB", "OSR1", "HEY2", "ANGPTL4", "SRGN", "CCR1", "LRP8", "MYC", "HCLS1", "TLR4", "HMOX1", "C1QC", "EFEMP1", "ACVRL1", "BTK", "CD86", "HIF1A", "THBS1", "TGFBR2", "SMYD1", "STAB1", "NGF", "DAB2", "FBN2", "TESC", "SPI1", "SERPINE1", "AXIN2", "CD44", "PTGIS", "ZNF703", "IRF1", "AXL", "CDK6", "IL10", "SNAI2", "ZBTB16", "HSPA1B", "NGFR", "SPHK1…
195	SYSTEM PROCESS%GO%GO:0003008	2.39275e-12	4.05172e-11	0.898671	0.305244	2.18158	405	c("CORIN", "MYH6", "NPTX2", "ATP2A2", "SERPINA3", "KCNIP2", "KCNK1", "ANKRD2", "KLHL3", "NQO1", "MYOT", "RDH10", "HAS2", "PPARG", "SLC38A1", "TLR4", "CEL", "HMOX1", "AGTPBP1", "ADCY3", "EFEMP1", "ACVRL1", "EDN1", "GLUL", "SLC1A3", "HCN4", "AQP4", "MYL4", "C3AR1", "AQP9", "SLC38A2", "KCNJ8", "CYBA", "GABBR2", "EPB41L3", "ALDOA", "GNAO1", "AGTR1", "KCNH2", "MAGT1", "SDCBP", "GCHFR", "WDR1", "KCNK3"…
196	NEGATIVE REGULATION OF PROTEIN MODIFICATION PROCESS%GO%GO:0031400	2.51667e-12	4.23981e-11	0.898671	0.404187	2.63207	151	c("BMP7", "SOCS3", "SAMSN1", "DDIT4", "G6PD", "PRKCD", "DUSP2", "SOCS1", "SPI1", "DUSP1", "PID1", "PSME2", "PSMD8", "MVP", "DBNDD2", "NF2", "IRAK3", "HYAL2", "PSMB8", "ERRFI1", "PYCARD", "GMFG", "PTEN", "RGS2", "DNAJC3", "CAV1", "GSTP1", "GMFB", "PSMA4", "PSME1", "DUSP5", "PSMA6", "PAK2", "PSMB6", "LYN", "TINF2", "PSMD14", "PSMA3", "DUSP7", "SNX6", "ANAPC7", "ZGPAT", "PSMD2", "NXN", "MLXIPL", "MA…
197	KINASE ACTIVITY%GO%GO:0016301	2.60081e-12	4.35932e-11	0.898671	0.331173	2.30426	280	c("CCL2", "HK2", "MARK3", "HK3", "SYK", "MPP3", "PDGFRA", "TGFA", "PIM1", "MAP3K8", "WNK3", "CDKN1A", "CSF1R", "GRK5", "EFEMP1", "ACVRL1", "TGFBR3", "BTK", "MAP3K6", "IRAK1", "TGFBR2", "PIK3R3", "PRKCD", "GALK1", "NME1", "CDK2", "DCLK1", "WNK1", "FGR", "STK17B", "TK1", "CDK6", "TYRO3", "SPHK1", "RPS6KA2", "PMVK", "PDK4", "IRAK3", "DGKD", "FES", "MUSK", "AURKA", "HIPK2", "FGFRL1", "JAK1", "PFKFB3"…
198	REGULATION OF CELL CYCLE%GO%GO:0051726	2.86832e-12	4.78343e-11	0.898671	0.335503	2.33245	276	c("BMP7", "BLM", "EIF4EBP1", "TSPYL2", "TGFA", "PIM1", "BCL6", "MYC", "CDKN1A", "EDN1", "THBS1", "NGF", "CCNG1", "DCUN1D3", "GAS1", "DDX3X", "AXIN2", "SERTAD1", "CDK2", "ZNF703", "PID1", "PSME2", "IRF1", "ASNS", "RUNX3", "PSMD8", "CDK6", "NGFR", "SPHK1", "RPS6KA2", "AIF1", "PSMB8", "AURKA", "YY1AP1", "EPS8", "RBM38", "HIPK2", "NKX3-1", "USP2", "RARA", "MAP2K1", "CDC7", "PTEN", "RHOB", "CAB39L", "…
199	REGULATION OF CYTOKINE PRODUCTION%GO%GO:0001817	2.98721e-12	4.95667e-11	0.898671	0.385575	2.55287	170	c("C3", "NCKAP1L", "SLC11A1", "SRGN", "CSF1R", "TLR4", "HMOX1", "IL17RA", "TLR2", "BTK", "CD86", "HIF1A", "IL6R", "THBS1", "NOD2", "DDX3X", "SERPINE1", "EBI3", "IRF1", "CD276", "FGR", "CD4", "AXL", "BCL3", "IL10", "SNAI2", "TLR8", "WNT5A", "IRAK3", "HYAL2", "ZFP36", "LILRB2", "CD74", "RARA", "UBE2D3", "MALT1", "FZD5", "PYCARD", "IFI16", "RIPK2", "MAPK13", "FURIN", "NFKBIA", "CEBPG", "NFKBIB", "TL…
200	CELL DEVELOPMENT%GO%GO:0048468	3.31563e-12	5.4741e-11	0.898671	0.323346	2.27059	317	c("MYH6", "BMP7", "KCNIP2", "PDGFRA", "NCKAP1L", "OSR1", "HEY2", "PDE4D", "TYROBP", "PPARG", "CHL1", "TGFBR3", "HIF1A", "CCL21", "G6PD", "ITGA5", "EPB41L3", "RORB", "SDCBP", "ITGA2", "RTN4RL1", "ABLIM3", "WNK1", "RUNX3", "AXL", "MTCH1", "CDK6", "SNAI2", "TYRO3", "RPS6KA2", "CLTC", "HNRNPAB", "WNT5A", "GRB2", "ACTG1", "PLXNB1", "FERMT2", "FES", "MUSK", "COL4A4", "NTN1", "CAP1", "SOX11", "FZD5", "N…
201	CATION BINDING%GO%GO:0043169	3.37537e-12	5.54501e-11	0.898671	0.338987	2.34891	263	c("ADH1B", "S100A9", "KCNIP2", "SPOCK1", "GNMT", "PIM1", "MT1X", "S100A8", "LCP1", "PLSCR1", "ALOX5", "MAP3K6", "ADA", "THBS1", "RPS27", "S100P", "TESC", "GCA", "NME1", "IDH1", "ABLIM3", "CD4", "TK1", "MEGF9", "SCGN", "PAPOLA", "UHRF1", "SPHK1", "AIF1", "IRAK3", "SLC25A13", "MT2A", "SOD2", "IDH2", "GRIN2A", "DNER", "S100A12", "LRP4", "FBP1", "GRIN3A", "CLIP1", "FTL", "PYGL", "JMJD6", "ITSN1", "AP…
202	CELL MOTILITY%GO%GO:0048870	3.55459e-12	5.7819e-11	0.898671	0.350022	2.40479	236	c("CCL2", "GRB14", "APOB", "CCL11", "ATP1B3", "ATP1B1", "S100A9", "SPOCK1", "SYK", "FCER1G", "PDGFRA", "NCKAP1L", "S100A8", "CCR1", "CD58", "DDIT4", "ACVRL1", "TGFBR3", "EDN1", "IL6R", "CCL21", "THBS1", "SLC7A8", "ITGAM", "ITGA5", "SPATA13", "SELE", "S100P", "AGTR1", "SDCBP", "MERTK", "IL10", "SNAI2", "SPA17", "TYRO3", "ITGB2", "SH3KBP1", "GRB2", "PLXNB1", "CORO1A", "PHACTR1", "ITGA3", "ANGPT2", …
203	LOCALIZATION OF CELL%GO%GO:0051674	3.55459e-12	5.7819e-11	0.898671	0.350022	2.40479	236	c("CCL2", "GRB14", "APOB", "CCL11", "ATP1B3", "ATP1B1", "S100A9", "SPOCK1", "SYK", "FCER1G", "PDGFRA", "NCKAP1L", "S100A8", "CCR1", "CD58", "DDIT4", "ACVRL1", "TGFBR3", "EDN1", "IL6R", "CCL21", "THBS1", "SLC7A8", "ITGAM", "ITGA5", "SPATA13", "SELE", "S100P", "AGTR1", "SDCBP", "MERTK", "IL10", "SNAI2", "SPA17", "TYRO3", "ITGB2", "SH3KBP1", "GRB2", "PLXNB1", "CORO1A", "PHACTR1", "ITGA3", "ANGPT2", …
204	RNA BIOSYNTHETIC PROCESS%GO%GO:0032774	3.67407e-12	5.94695e-11	0.887075	0.312039	2.21252	347	c("CEBPD", "ZBTB7B", "PPARG", "MYC", "TSC22D1", "HIF1A", "TGIF1", "RPS27", "ATF4", "E2F5", "NR4A2", "TEAD2", "MAFF", "RORB", "SERPINE1", "NR4A3", "ESRRG", "IRF1", "FOSL1", "C5AR1", "SNRPB", "RUNX3", "BCL3", "PAPOLA", "HSF2", "ETV7", "RPLP0", "MAF", "MSC", "RPS19", "BATF3", "RARA", "RPL34", "UBE2D3", "ESRRA", "NR1H2", "RPL27A", "RPS5", "RPL29", "MED16", "RPL18", "RPS18", "TTF2", "NFKBIB", "RPL24",…
205	CELLULAR RESPONSE TO ENDOGENOUS STIMULUS%GO%GO:0071495	4.68964e-12	7.55376e-11	0.887075	0.339577	2.34674	255	c("CCL2", "BMP7", "NAMPT", "SOCS3", "FGF7", "EIF4EBP1", "FGF12", "CTSB", "HAS2", "PPARG", "MYC", "STAT3", "ADCY3", "ACVRL1", "TGFBR3", "AQP9", "AKR1C2", "TGIF1", "PRKAR2A", "TGFBR2", "PRKCD", "E2F5", "SOCS1", "EIF4G1", "CTSS", "MYO5A", "SERPINE1", "CD44", "SNAI2", "PPP1CC", "PDK4", "WNT5A", "GRB2", "HYAL2", "GNG12", "NKX3-1", "FGFRL1", "AKR1C3", "ATP6V1A", "RARA", "UBE2D3", "MAP2K1", "PDE2A", "PP…
206	POSITIVE REGULATION OF CELL PROLIFERATION%GO%GO:0008284	4.99333e-12	8.00387e-11	0.887075	0.363036	2.45356	205	c("NAMPT", "CCL11", "S1PR3", "FGF7", "OSMR", "PDGFRA", "NCKAP1L", "VASH2", "CD38", "OSR1", "TGFA", "HAS2", "MYC", "CDKN1A", "CSF1R", "HCLS1", "HMOX1", "EDN1", "CD86", "HIF1A", "AKR1C2", "IL6R", "TGFBR2", "NOD2", "EBI3", "NME1", "SERTAD1", "CDK2", "ZNF703", "PID1", "FOSL1", "CD276", "C5AR1", "CDK6", "SPHK1", "TIMP1", "WNT5A", "AIF1", "VIPR1", "LILRB2", "EIF5A", "NKX3-1", "AKR1C3", "CD74", "LIFR", …
207	NEUROGENESIS%GO%GO:0022008	5.526e-12	8.81491e-11	0.887075	0.326445	2.27961	301	c("CCL2", "BMP7", "KCNIP2", "SPOCK1", "FAIM2", "TYROBP", "LRP8", "STAT3", "CHL1", "AGTPBP1", "DDIT4", "ITGA5", "NR4A2", "EPB41L3", "NGF", "RORB", "SDCBP", "ITGA2", "RTN4RL1", "ABLIM3", "WNK1", "RUNX3", "MTCH1", "CDK6", "NGFR", "RPS6KA2", "CLTC", "NF2", "WNT5A", "GRB2", "ACTG1", "PLXNB1", "FES", "DNER", "COL4A4", "NTN1", "CAP1", "SOX11", "FZD5", "NKX2-5", "MAP2K1", "STIP1", "TRIO", "COL5A1", "PTEN…
208	NEGATIVE REGULATION OF PROGRAMMED CELL DEATH%GO%GO:0043069	5.88444e-12	9.34155e-11	0.887075	0.359912	2.44531	214	c("CCL2", "BMP7", "SOCS3", "BIRC3", "FAIM2", "NCKAP1L", "CD38", "OSR1", "PIM1", "ANGPTL4", "TNFAIP8", "WNK3", "BCL6", "MYC", "HCLS1", "HMOX1", "GRK5", "IL6R", "CCL21", "THBS1", "PRKCD", "ITGA5", "NOD2", "DAB2", "DDX3X", "SERPINE1", "CD44", "BCL2L1", "ASNS", "AXL", "BCL3", "IL10", "SNAI2", "HSPA1B", "TYRO3", "SPHK1", "PDK4", "WNT5A", "SOD2", "HTATIP2", "AVEN", "SH3GLB1", "CD74", "ANXA5", "MALT1", …
209	CELL MIGRATION%GO%GO:0016477	6.00392e-12	9.48562e-11	0.887075	0.353219	2.41312	221	c("CCL2", "GRB14", "APOB", "CCL11", "ATP1B3", "ATP1B1", "S100A9", "SPOCK1", "SYK", "FCER1G", "PDGFRA", "NCKAP1L", "S100A8", "CCR1", "CD58", "DDIT4", "ACVRL1", "TGFBR3", "EDN1", "IL6R", "CCL21", "THBS1", "SLC7A8", "ITGAM", "ITGA5", "SPATA13", "SELE", "S100P", "AGTR1", "SDCBP", "MERTK", "IL10", "SNAI2", "TYRO3", "ITGB2", "SH3KBP1", "GRB2", "PLXNB1", "CORO1A", "ITGA3", "ANGPT2", "WWC1", "RPS19", "EP…
210	POSITIVE REGULATION OF KINASE ACTIVITY%GO%GO:0033674	6.18373e-12	9.72318e-11	0.887075	0.360192	2.44075	208	c("CCL2", "FPR1", "ATF3", "PDGFRA", "NCKAP1L", "TSPYL2", "TGFA", "SLC11A1", "PIM1", "LRP8", "CSF1R", "TLR4", "ADCY3", "EDN1", "MAP3K6", "CCL21", "IRAK1", "THBS1", "PRKAR2A", "TGFBR2", "ATF4", "NOD2", "NGF", "GADD45B", "TNFRSF10A", "FGR", "ASNS", "C5AR1", "CD4", "SRPRB", "WNT5A", "XBP1", "DNAJB9", "ADD1", "NKX3-1", "MALT1", "LMNA", "MAP2K1", "JTB", "S100A12", "TEK", "HDGF", "RIPK2", "BAD", "IQGAP1…
211	NERVOUS SYSTEM DEVELOPMENT%GO%GO:0007399	6.3038e-12	9.865e-11	0.887075	0.297669	2.13583	428	c("LSAMP", "CCL2", "BMP7", "KCNIP2", "SPOCK1", "FAIM2", "FGF12", "TYROBP", "LRP8", "STAT3", "CHL1", "AGTPBP1", "DDIT4", "AQP4", "MOG", "TGFBR2", "ITGA5", "OLFM1", "NR4A2", "NINJ2", "EPB41L3", "NGF", "RORB", "CXCL1", "SDCBP", "ITGA2", "DCLK1", "RTN4RL1", "ABLIM3", "WNK1", "RUNX3", "MTCH1", "CDK6", "ZBTB16", "NGFR", "TYRO3", "RPS6KA2", "CLTC", "P2RX5", "NF2", "ECE2", "WNT5A", "GRB2", "ACTG1", "PLXN…
212	SIGNALING BY NGF%REACTOME%REACT_11061.7	6.55704e-12	1.02129e-10	0.887075	0.405649	2.61915	142	c("FGF7", "FGD2", "PDGFRA", "STAT3", "CDKN1A", "ADCY3", "CD86", "IL6R", "IRAK1", "PRKAR2A", "PIK3R3", "PRKCD", "NGF", "NGFR", "RPS6KA2", "JAK1", "MAP2K1", "TRIO", "RIPK2", "PPP2CB", "PTEN", "BAD", "ITSN1", "MAPK13", "FURIN", "NFKBIA", "RPS6KB2", "ITPR3", "RPS6KA1", "ARHGAP4", "MAPKAPK3", "PDGFRB", "MYD88", "AP2S1", "TIAM1", "NFKB1", "ARHGDIA", "FGD3", "ADCY1", "ELK1", "ECT2", "DUSP7", "NR4A1", "I…
213	INFLUENZA LIFE CYCLE%REACTOME%REACT_6145.4	6.69746e-12	1.03826e-10	0.887075	0.447075	2.75912	106	c("RPS27", "HSPA1B", "RPLP0", "RPS19", "RPL34", "RPL27A", "RPS5", "RPL29", "RPL18", "RPS18", "RPL24", "RPL13", "DNAJC3", "RPS17", "RPS3", "NUP205", "RPL35", "RPS15A", "IPO5", "RPS2", "HSP90AA1", "RPS28", "RPSA", "RPL41", "RPLP2", "RPL18A", "RPS10", "NUP35", "RPL12", "RPS9", "RPL36A", "RPS6", "RPL21", "RPL28", "CALR", "RPL26", "NUP93", "RPS12", "RPL37A", "RPL38", "RPL10A", "RPS15", "RPL17", "RPL36…
214	GENERATION OF NEURONS%GO%GO:0048699	7.62456e-12	1.17646e-10	0.875325	0.324778	2.26434	291	c("BMP7", "KCNIP2", "SPOCK1", "FAIM2", "TYROBP", "LRP8", "STAT3", "CHL1", "AGTPBP1", "DDIT4", "ITGA5", "NR4A2", "EPB41L3", "NGF", "RORB", "SDCBP", "ITGA2", "RTN4RL1", "ABLIM3", "WNK1", "RUNX3", "MTCH1", "CDK6", "NGFR", "RPS6KA2", "CLTC", "WNT5A", "GRB2", "ACTG1", "PLXNB1", "FES", "DNER", "COL4A4", "NTN1", "CAP1", "SOX11", "FZD5", "NKX2-5", "MAP2K1", "STIP1", "TRIO", "COL5A1", "PTEN", "RHOB", "ITG…
215	GTP HYDROLYSIS AND JOINING OF THE 60S RIBOSOMAL SUBUNIT%REACTOME%REACT_2085.2	7.81489e-12	1.20022e-10	0.875325	0.467539	2.80769	91	c("RPS27", "EIF4G1", "EIF5", "EIF4A1", "RPLP0", "RPS19", "RPL34", "RPL27A", "RPS5", "RPL29", "RPL18", "RPS18", "RPL24", "RPL13", "RPS17", "RPS3", "RPL35", "EIF3B", "RPS15A", "RPS2", "EIF1AX", "RPS28", "RPSA", "RPL41", "RPLP2", "RPL18A", "RPS10", "RPL12", "EIF3J", "RPS9", "RPL36A", "RPS6", "RPL21", "RPL28", "RPL26", "RPS12", "RPL37A", "RPL38", "RPL10A", "EIF3I", "RPS15", "RPL17", "RPL36", "RPL13A"…
216	CELL DEATH%GO%GO:0008219	9.18546e-12	1.39771e-10	0.875325	0.318178	2.24002	322	c("HK2", "S100A9", "FGD2", "CD38", "GLRX2", "TNFAIP8", "S100A8", "SRGN", "PPARG", "MYC", "CDKN1A", "HMOX1", "DDIT4", "PLSCR1", "PPP3CC", "BTK", "THBS1", "PRKCD", "ATF4", "NGF", "DDX3X", "LY86", "PREX1", "CD44", "PSME2", "TNFRSF10A", "BCL2L1", "PSMD8", "TNFRSF1A", "MTCH1", "BCL3", "ZBTB16", "NGFR", "SLC11A2", "ITGB2", "IFI27", "SOD2", "BID", "ADD1", "PSMB8", "HIPK2", "NKX3-1", "FZD5", "LMNA", "IL2…
217	DEATH%GO%GO:0016265	9.18546e-12	1.39771e-10	0.875325	0.318178	2.24002	322	c("HK2", "S100A9", "FGD2", "CD38", "GLRX2", "TNFAIP8", "S100A8", "SRGN", "PPARG", "MYC", "CDKN1A", "HMOX1", "DDIT4", "PLSCR1", "PPP3CC", "BTK", "THBS1", "PRKCD", "ATF4", "NGF", "DDX3X", "LY86", "PREX1", "CD44", "PSME2", "TNFRSF10A", "BCL2L1", "PSMD8", "TNFRSF1A", "MTCH1", "BCL3", "ZBTB16", "NGFR", "SLC11A2", "ITGB2", "IFI27", "SOD2", "BID", "ADD1", "PSMB8", "HIPK2", "NKX3-1", "FZD5", "LMNA", "IL2…
218	VIRAL REPRODUCTIVE PROCESS%GO%GO:0022415	9.34287e-12	1.41514e-10	0.875325	0.426311	2.68906	121	c("CCL2", "CD209", "RPS27", "CD4", "RPLP0", "HYAL2", "RPS19", "DERL1", "HIPK2", "RPL34", "TAP1", "RPL27A", "RPS5", "RPL29", "RPL18", "RPS18", "FURIN", "RPL24", "RPL13", "LRSAM1", "RPS17", "RPS3", "RPL35", "ITCH", "RPS15A", "RPS2", "RXRA", "RPS28", "RPSA", "RPL41", "RPLP2", "RPL18A", "RPS10", "RPL12", "RPS9", "RPL36A", "RPS6", "RPL21", "RPL28", "RPL26", "RPS12", "RPL37A", "DAG1", "RPL38", "RPL10A"…
219	MRNA METABOLIC PROCESS%GO%GO:0016071	9.90588e-12	1.49357e-10	0.875325	0.336361	2.32451	255	c("PPIL1", "CSDC2", "PRKCD", "RPS27", "TNPO1", "EIF4G1", "PSME2", "SNRPB", "PSMD8", "PAPOLA", "HSPA1B", "EIF4A1", "RPLP0", "DDX23", "RPS19", "ZFP36", "PSMB8", "EFTUD2", "EXOSC4", "RPL34", "PRPF4", "TNKS1BP1", "RPL27A", "RPS5", "RPL29", "RPL18", "RPS18", "HNRNPF", "RPL24", "RPL13", "ETF1", "RPS17", "RPS3", "RPL35", "SNRPG", "PSME4", "DHX9", "RPS15A", "PSMA4", "RPS2", "LSM6", "MAGOH", "PSME1", "RPS…
220	POSITIVE REGULATION OF TRANSCRIPTION, DNA-DEPENDENT%GO%GO:0045893	1.02661e-11	1.54085e-10	0.875325	0.315659	2.22559	328	c("BMP7", "NAMPT", "BLM", "CD38", "OSR1", "HEY2", "SLC11A1", "SREBF1", "PPARG", "MYC", "STAT3", "HCLS1", "TLR4", "PLSCR1", "SEC14L2", "ACVRL1", "TFE3", "TLR2", "CD86", "HIF1A", "TCF21", "IRAK1", "ARNTL", "ATF4", "E2F5", "NRIP1", "DAB2", "DDX3X", "RORB", "TESC", "SPI1", "SERPINE1", "PID1", "ESRRG", "IRF1", "TNFRSF1A", "BCL3", "IL10", "ZBTB16", "PICALM", "UHRF1", "HSF2", "HNRNPAB", "NCOA7", "WNT5A"…
221	NEGATIVE REGULATION OF CATALYTIC ACTIVITY%GO%GO:0043086	1.29112e-11	1.92908e-10	0.875325	0.351619	2.41156	229	c("BMP7", "SOCS3", "SERPINA3", "SPOCK1", "NCKAP1L", "ANGPTL4", "TNFAIP8", "TFPI", "SERPINA1", "THBS1", "PRKCD", "DUSP2", "SOCS1", "GABBR2", "DDX3X", "GLA", "PPP2R5A", "DUSP1", "SERPINE1", "CD44", "PSME2", "WNK1", "PSMD8", "MVP", "DBNDD2", "UBN1", "IRAK3", "SERPINH1", "CAST", "HYAL2", "SERPINB1", "CABP1", "PSMB8", "CST3", "ERRFI1", "PYCARD", "IFI16", "GPX1", "GMFG", "SERPINB8", "PTEN", "RGS2", "SE…
222	PROGRAMMED CELL DEATH%GO%GO:0012501	1.36352e-11	2.02808e-10	0.875325	0.319754	2.2367	308	c("HK2", "S100A9", "FGD2", "CD38", "GLRX2", "TNFAIP8", "S100A8", "SRGN", "PPARG", "MYC", "CDKN1A", "DDIT4", "PLSCR1", "PPP3CC", "BTK", "THBS1", "PRKCD", "ATF4", "NGF", "DDX3X", "LY86", "PREX1", "CD44", "PSME2", "TNFRSF10A", "BCL2L1", "PSMD8", "TNFRSF1A", "MTCH1", "BCL3", "ZBTB16", "NGFR", "SLC11A2", "ITGB2", "IFI27", "SOD2", "BID", "ADD1", "PSMB8", "HIPK2", "NKX3-1", "FZD5", "LMNA", "IL2RA", "PYC…
223	APOPTOTIC PROCESS%GO%GO:0006915	1.38765e-11	2.05471e-10	0.875325	0.319326	2.23187	305	c("HK2", "S100A9", "FGD2", "CD38", "GLRX2", "TNFAIP8", "S100A8", "SRGN", "PPARG", "MYC", "CDKN1A", "DDIT4", "PLSCR1", "PPP3CC", "BTK", "THBS1", "PRKCD", "ATF4", "NGF", "DDX3X", "LY86", "PREX1", "CD44", "PSME2", "TNFRSF10A", "BCL2L1", "PSMD8", "TNFRSF1A", "MTCH1", "BCL3", "ZBTB16", "NGFR", "SLC11A2", "ITGB2", "IFI27", "SOD2", "BID", "ADD1", "PSMB8", "HIPK2", "NKX3-1", "FZD5", "LMNA", "IL2RA", "PYC…
224	TRANSLATIONAL INITIATION%GO%GO:0006413	1.58864e-11	2.34183e-10	0.863415	0.435533	2.68222	103	c("EIF4EBP1", "RPS27", "EIF4G1", "EIF5", "EIF4A1", "RPLP0", "RPS19", "RPL34", "RPL27A", "RPS5", "RPL29", "RPL18", "RPS18", "RPL24", "RPL13", "RPS17", "RPS3", "RPL35", "EIF3B", "RPS15A", "EIF3M", "RPS2", "EIF1AX", "RPS28", "RPSA", "RPL41", "RPLP2", "RPL18A", "RPS10", "RPL12", "EIF3J", "RPS9", "RPL36A", "RPS6", "RPL21", "RPL28", "RPL26", "RPS12", "RPL37A", "RPL38", "RPL10A", "EIF3I", "RPS15", "RPL1…
225	Pathways in cancer%KEGG%hsa05200	1.70137e-11	2.49685e-10	0.863415	0.371536	2.47462	181	c("FGF7", "SLC2A1", "BIRC3", "PDGFRA", "FGF12", "TGFA", "PPARG", "MYC", "STAT3", "CDKN1A", "CSF1R", "HIF1A", "TGFBR2", "PIK3R3", "SPI1", "AXIN2", "ITGA2", "CDK2", "BCL2L1", "CDK6", "ZBTB16", "CSF2RA", "MMP2", "CBLB", "WNT5A", "GRB2", "ITGA3", "BID", "NKX3-1", "COL4A4", "EGLN1", "LAMC2", "RARA", "JAK1", "FZD5", "MAP2K1", "PTEN", "ITGB1", "BAD", "NFKBIA", "MSH6", "GSTP1", "MET", "PIK3R5", "FN1", "H…
226	PLATELET ACTIVATION%GO%GO:0030168	1.73069e-11	2.52864e-10	0.863415	0.419419	2.66328	125	c("CFD", "F13A1", "SYK", "FCER1G", "F5", "PDGFRA", "FERMT3", "SRGN", "F8", "APBB1IP", "PLEK", "PLSCR1", "SERPINA1", "THBS1", "PIK3R3", "PRKCD", "ALDOA", "SERPINE1", "WDR1", "TYRO3", "GNA15", "TIMP1", "GRB2", "DGKD", "PSAP", "CD63", "CAP1", "GNA13", "RHOB", "SERPING1", "PIK3R5", "ITPR3", "VWF", "LCP2", "FN1", "ITGB3", "YWHAZ", "CFL1", "RAPGEF3", "F2RL3", "LYN", "RAC2", "PTPN1", "RAP1B", "TUBA4A", …
227	ACTIVATION OF INNATE IMMUNE RESPONSE%GO%GO:0002218	1.76551e-11	2.56815e-10	0.863415	0.499463	2.90353	73	c("TLR4", "TLR2", "BTK", "MARCO", "IRAK1", "NOD2", "LY96", "UNC93B1", "RPS6KA2", "IRAK3", "CLEC7A", "PIK3AP1", "PYCARD", "MAP2K1", "IFI16", "RIPK2", "NFKBIA", "NFKBIB", "TRIM5", "ITCH", "CD14", "RPS6KA1", "RIPK1", "MAPKAPK3", "IRAK4", "MYD88", "MAP2K4", "NFKB1", "HCK", "ELK1", "DUSP7", "TLR5", "TICAM2", "TLR6", "TNIP2", "CHUK", "MAP2K3", "JUN", "PELI1", "RELA", "FOS", "MAP2K2", "MAPK7", "NLRC4", …
228	METAL ION BINDING%GO%GO:0046872	1.7979e-11	2.6038e-10	0.863415	0.341104	2.35045	246	c("ADH1B", "S100A9", "KCNIP2", "SPOCK1", "PIM1", "MT1X", "S100A8", "LCP1", "PLSCR1", "ALOX5", "MAP3K6", "ADA", "THBS1", "RPS27", "S100P", "TESC", "GCA", "NME1", "IDH1", "ABLIM3", "CD4", "TK1", "MEGF9", "SCGN", "PAPOLA", "UHRF1", "SPHK1", "AIF1", "IRAK3", "SLC25A13", "MT2A", "SOD2", "IDH2", "GRIN2A", "DNER", "S100A12", "LRP4", "FBP1", "CLIP1", "FTL", "JMJD6", "ITSN1", "APEX1", "ALKBH3", "IQGAP1", …
229	POSITIVE REGULATION OF INNATE IMMUNE RESPONSE%GO%GO:0045089	2.13078e-11	3.07242e-10	0.863415	0.4795	2.83949	83	c("TLR4", "PVR", "PLSCR1", "TLR2", "BTK", "MARCO", "IRAK1", "NOD2", "LY96", "UNC93B1", "TLR8", "RPS6KA2", "IRAK3", "CLEC7A", "RPS19", "PIK3AP1", "PYCARD", "MAP2K1", "IFI16", "RIPK2", "NFKBIA", "NFKBIB", "TRIM5", "ITCH", "CD14", "RPS6KA1", "RIPK1", "MAPKAPK3", "IRAK4", "MYD88", "MAP2K4", "NFKB1", "HCK", "ELK1", "DUSP7", "TLR5", "TICAM2", "TLR6", "TNIP2", "CHUK", "MAP2K3", "JUN", "PELI1", "RELA", "…
230	MULTI-ORGANISM REPRODUCTIVE PROCESS%GO%GO:0044703	2.38184e-11	3.41949e-10	0.863415	0.397083	2.56385	142	c("CORIN", "CCL2", "CD209", "RPS27", "MAFF", "CD4", "SPP1", "RPLP0", "HYAL2", "RPS19", "DERL1", "HIPK2", "RPL34", "TAP1", "RPL27A", "RPS5", "RPL29", "RPL18", "RPS18", "FURIN", "RPL24", "RPL13", "LRSAM1", "RPS17", "RPS3", "RPL35", "ITCH", "RPS15A", "RPS2", "RXRA", "RPS28", "RPSA", "RPL41", "RPLP2", "RPL18A", "RPS10", "STOX2", "RPL12", "RPS9", "RPL36A", "RPS6", "RPL21", "RPL28", "RPL26", "RPS12", "…
231	NEUROTROPHIN TRK RECEPTOR SIGNALING PATHWAY%GO%GO:0048011	2.45931e-11	3.51542e-10	0.863415	0.423721	2.68016	123	c("FGD2", "STAT3", "DDIT4", "ADCY3", "IRAK1", "PRKAR2A", "PRKCD", "NGF", "PREX1", "NGFR", "RPS6KA2", "CLTC", "GRB2", "MAP2K1", "TRIO", "RIPK2", "PTEN", "BAD", "ITSN1", "MAPK13", "FURIN", "NFKBIA", "RPS6KB2", "ITPR3", "RPS6KA1", "ARHGAP4", "MAPKAPK3", "MYD88", "AP2S1", "TIAM1", "NFKB1", "ARHGDIA", "FGD3", "ADCY1", "ELK1", "ECT2", "DUSP7", "NR4A1", "IRS2", "NRAS", "CHUK", "PRKCI", "RELA", "SHC1", "…
232	CELLULAR LIPID METABOLIC PROCESS%GO%GO:0044255	2.64349e-11	3.74627e-10	0.863415	0.32146	2.2448	301	c("LPCAT3", "SGPP2", "PLA2G2A", "PTDSS1", "PRDX6", "GGT5", "CHPT1", "CDS1", "ANGPTL4", "NANS", "RDH10", "CSF1R", "CEL", "ABHD5", "PLEK", "PLSCR1", "ALOX5", "EDN1", "GPD1", "SLC44A3", "AKR1C2", "PIK3R3", "GLIPR1", "ALOX5AP", "GLA", "ETNK2", "PDSS1", "IDH1", "PTGIS", "TNFRSF21", "RETSAT", "LPCAT4", "FASN", "ACACB", "SPHK1", "ACSL5", "SGMS2", "PPP1CC", "HMGCS2", "NPAS2", "PIGA", "DGKD", "PSAP", "TXN…
233	REGULATION OF CELL DIFFERENTIATION%GO%GO:0045595	2.64349e-11	3.74627e-10	0.863415	0.316881	2.2139	303	c("HOPX", "BMP7", "APOB", "PLA2G2A", "SPOCK1", "PDGFRA", "MEIS1", "NCKAP1L", "MAFB", "OSR1", "HEY2", "CCR1", "PPARG", "LRP8", "MYC", "HCLS1", "TLR4", "C1QC", "EFEMP1", "ACVRL1", "EDN1", "BTK", "CD86", "ABCG1", "HIF1A", "IL6R", "TGFBR2", "SMYD1", "MSR1", "NGF", "DAB2", "FBN2", "AGTR1", "TESC", "SPI1", "AXIN2", "ZNF703", "IRF1", "AXL", "CDK6", "SNAI2", "ZBTB16", "HSPA1B", "NGFR", "WNT5A", "RPS19", …
234	TOLL LIKE RECEPTOR 4 (TLR4) CASCADE%REACTOME%REACT_6894.8	2.67286e-11	3.77171e-10	0.863415	0.487928	2.86025	78	c("BIRC3", "TLR4", "TLR2", "BTK", "IL6R", "IRAK1", "ITGAM", "NOD2", "LY86", "LY96", "RPS6KA2", "ITGB2", "IRAK3", "JAK1", "UBE2D3", "MAP2K1", "S100A12", "RIPK2", "PPP2CB", "NFKBIA", "NFKBIB", "CD14", "RPS6KA1", "RIPK1", "MAPKAPK3", "IRAK4", "MYD88", "RIPK3", "MAP2K4", "NFKB1", "ELK1", "DUSP7", "FADD", "TICAM2", "TLR6", "CHUK", "MAP2K3", "JUN", "PELI1", "RELA", "SIGIRR", "FOS", "BIRC2", "MAP2K2", "…
235	BCR%NETPATH%BCR	2.70009e-11	3.79391e-10	0.863415	0.441812	2.71828	102	c("EIF4EBP1", "SYK", "WAS", "BCL6", "STAT3", "HCLS1", "BTK", "NEDD9", "PRKCD", "CDK2", "CDK6", "CBLB", "GRB2", "FCGR2B", "IFITM1", "PIK3AP1", "MALT1", "MAP2K1", "CMTM3", "NFKBIA", "MAPK4", "LCP2", "DAPP1", "RPS6KA1", "DOK3", "LYN", "CCND3", "NFKB1", "HCK", "CASP7", "ELK1", "RPS6", "INPP5D", "CSK", "PLEKHA1", "DOK1", "VASP", "CHUK", "JUN", "RELA", "SH3BP2", "FOS", "SHC1", "FOXO3", "FOSB", "MAP2K2"…
236	NEUROTROPHIN SIGNALING PATHWAY%GO%GO:0038179	2.74873e-11	3.8459e-10	0.863415	0.418483	2.65252	124	c("FGD2", "STAT3", "DDIT4", "ADCY3", "IRAK1", "PRKAR2A", "PRKCD", "NGF", "PREX1", "NGFR", "RPS6KA2", "CLTC", "GRB2", "MAP2K1", "TRIO", "RIPK2", "PTEN", "BAD", "ITSN1", "MAPK13", "FURIN", "NFKBIA", "RPS6KB2", "ITPR3", "RPS6KA1", "ARHGAP4", "MAPKAPK3", "MYD88", "AP2S1", "TIAM1", "NFKB1", "ARHGDIA", "FGD3", "ADCY1", "ELK1", "ECT2", "DUSP7", "NR4A1", "IRS2", "NRAS", "CHUK", "PRKCI", "RELA", "SHC1", "…
237	POSITIVE REGULATION OF DEVELOPMENTAL PROCESS%GO%GO:0051094	3.32253e-11	4.62912e-10	0.851339	0.343374	2.35265	226	c("BMP7", "APOB", "PLA2G2A", "NCKAP1L", "VASH2", "OSR1", "ANGPTL4", "CCR1", "PPARG", "LRP8", "MYC", "HCLS1", "ACVRL1", "BTK", "CD86", "HIF1A", "IL6R", "THBS1", "TGFBR2", "SMYD1", "MSR1", "NGF", "DAB2", "FBN2", "AGTR1", "TESC", "SERPINE1", "AXIN2", "PTGIS", "ZNF703", "AXL", "ZBTB16", "HSPA1B", "NGFR", "SPHK1", "WNT5A", "ANXA3", "LILRB2", "IFITM1", "FES", "HIPK2", "RARA", "SOX11", "LMNA", "NKX2-5",…
238	POSITIVE REGULATION OF TRANSFERASE ACTIVITY%GO%GO:0051347	3.51655e-11	4.87792e-10	0.851339	0.350871	2.38164	212	c("CCL2", "FPR1", "ATF3", "PDGFRA", "NCKAP1L", "TSPYL2", "TGFA", "SLC11A1", "PIM1", "LRP8", "CSF1R", "TLR4", "ADCY3", "EDN1", "MAP3K6", "CCL21", "IRAK1", "THBS1", "PRKAR2A", "TGFBR2", "ATF4", "NOD2", "NGF", "GADD45B", "TNFRSF10A", "FGR", "ASNS", "C5AR1", "CD4", "SRPRB", "WNT5A", "XBP1", "DNAJB9", "ADD1", "NKX3-1", "MALT1", "LMNA", "MAP2K1", "JTB", "S100A12", "TEK", "HDGF", "RIPK2", "BAD", "IQGAP1…
239	REGULATION OF CELL ACTIVATION%GO%GO:0050865	3.53066e-11	4.87792e-10	0.851339	0.415714	2.6252	122	c("CCL2", "SYK", "PDGFRA", "NCKAP1L", "CD38", "MAP3K8", "CD209", "SAMSN1", "TLR4", "PLEK", "PLSCR1", "BTK", "CD86", "CCL21", "THBS1", "TGFBR2", "STXBP2", "PIK3R3", "PRKCD", "NOD2", "HLA-DRA", "EBI3", "IRF1", "CD276", "FGR", "CD4", "AXL", "IL10", "WNT5A", "GRB2", "AIF1", "LILRB2", "FES", "CD74", "HLA-DPA1", "RARA", "SOX11", "MALT1", "PYCARD", "YES1", "CAV1", "HLA-DRB4", "MNDA", "CD274", "CLCF1", "…
240	NEGATIVE REGULATION OF RESPONSE TO STIMULUS%GO%GO:0048585	3.66206e-11	5.03838e-10	0.851339	0.320069	2.23509	301	c("CCL2", "BMP7", "PPARG", "MYC", "SAMSN1", "TLR4", "PLEK", "DDIT4", "NKD2", "ADA", "TCF21", "THBS1", "TGFBR2", "PRKCD", "DUSP2", "SOCS1", "DAB2", "DDX3X", "FBN2", "DUSP1", "SERPINE1", "AXIN2", "CD44", "PTGIS", "PID1", "BCL2L1", "TNFRSF1A", "CDK6", "IL10", "SNAI2", "TYRO3", "CLTC", "PPP1CC", "NF2", "WNT5A", "SH3KBP1", "GRB2", "AIF1", "IRAK3", "EPN1", "HYAL2", "ANGPT2", "RPS19", "HIPK2", "NKX3-1",…
241	TRANSPORTER ACTIVITY%GO%GO:0005215	3.85607e-11	5.2833e-10	0.851339	0.314816	2.20216	308	c("AZGP1", "ATP2A2", "APOB", "SLC2A1", "SLC1A5", "KCNIP2", "KCNK1", "ATP1A1", "SLC5A1", "PLP2", "PDPN", "SLC11A1", "SLC9A7", "SLC38A1", "EBP", "PLSCR1", "SLC1A3", "HCN4", "AQP4", "ABCG1", "AQP9", "KCNJ8", "SLC4A7", "SLC7A8", "SLC4A3", "SLCO2A1", "SLC39A14", "CLIC4", "ABCC3", "KCNH2", "RAMP1", "MAGT1", "KCNK3", "SLCO2B1", "SLC11A2", "HVCN1", "P2RX5", "SLC25A13", "ABCB6", "MAL", "GRIK2", "IPO7", "T…
242	3' -UTR-MEDIATED TRANSLATIONAL REGULATION%REACTOME%REACT_1762.2	4.1805e-11	5.68067e-10	0.851339	0.464717	2.78888	90	c("RPS27", "EIF4G1", "EIF4A1", "RPLP0", "RPS19", "RPL34", "RPL27A", "RPS5", "RPL29", "RPL18", "RPS18", "RPL24", "RPL13", "RPS17", "RPS3", "RPL35", "EIF3B", "RPS15A", "RPS2", "EIF1AX", "RPS28", "RPSA", "RPL41", "RPLP2", "RPL18A", "RPS10", "RPL12", "EIF3J", "RPS9", "RPL36A", "RPS6", "RPL21", "RPL28", "RPL26", "RPS12", "RPL37A", "RPL38", "RPL10A", "EIF3I", "RPS15", "RPL17", "RPL36", "RPL13A", "RPL4"…
243	L13A-MEDIATED TRANSLATIONAL SILENCING OF CERULOPLASMIN EXPRESSION%REACTOME%REACT_79.2	4.1805e-11	5.68067e-10	0.851339	0.464717	2.78888	90	c("RPS27", "EIF4G1", "EIF4A1", "RPLP0", "RPS19", "RPL34", "RPL27A", "RPS5", "RPL29", "RPL18", "RPS18", "RPL24", "RPL13", "RPS17", "RPS3", "RPL35", "EIF3B", "RPS15A", "RPS2", "EIF1AX", "RPS28", "RPSA", "RPL41", "RPLP2", "RPL18A", "RPS10", "RPL12", "EIF3J", "RPS9", "RPL36A", "RPS6", "RPL21", "RPL28", "RPL26", "RPS12", "RPL37A", "RPL38", "RPL10A", "EIF3I", "RPS15", "RPL17", "RPL36", "RPL13A", "RPL4"…
244	IDENTICAL PROTEIN BINDING%GO%GO:0042802	5.11812e-11	6.89797e-10	0.851339	0.309363	2.18558	335	c("SLC2A1", "ATF3", "HOOK1", "KCNIP2", "WAS", "PDGFRA", "CBS", "SLC11A1", "SLC9A7", "TYROBP", "CSF1R", "GPSM2", "PLEK", "HMOX1", "BTK", "GLUL", "SHMT1", "ABCG1", "IL6R", "IRAK1", "THBS1", "G6PD", "TKT", "SLC4A3", "IMPA2", "C1S", "ALDOA", "CALCOCO2", "GLA", "TESC", "PTPRG", "GCA", "HM13", "NME1", "IDH1", "PRKRA", "BCL2L1", "CD4", "LTBR", "MLX", "ZBTB16", "UHRF1", "RAP1GAP", "GRB2", "IRAK3", "ACTG1…
245	SUBSTRATE-SPECIFIC TRANSPORTER ACTIVITY%GO%GO:0022892	5.11812e-11	6.89797e-10	0.851339	0.332456	2.29983	256	c("AZGP1", "ATP2A2", "APOB", "SLC2A1", "SLC1A5", "KCNIP2", "KCNK1", "ATP1A1", "SLC5A1", "PLP2", "PDPN", "SLC11A1", "SLC9A7", "SLC38A1", "PLSCR1", "SLC1A3", "HCN4", "AQP4", "ABCG1", "AQP9", "KCNJ8", "SLC4A7", "SLC7A8", "SLC4A3", "SLCO2A1", "SLC39A14", "CLIC4", "ABCC3", "KCNH2", "RAMP1", "MAGT1", "KCNK3", "SLCO2B1", "SLC11A2", "HVCN1", "P2RX5", "SLC25A13", "GRIK2", "TAP1", "SLC1A1", "SLC36A2", "GPR…
246	PHOSPHOTRANSFERASE ACTIVITY, ALCOHOL GROUP AS ACCEPTOR%GO%GO:0016773	5.41057e-11	7.26249e-10	0.851339	0.329112	2.27442	255	c("CCL2", "HK2", "MARK3", "HK3", "SYK", "PDGFRA", "TGFA", "PIM1", "MAP3K8", "WNK3", "CDKN1A", "CSF1R", "GRK5", "EFEMP1", "ACVRL1", "TGFBR3", "BTK", "MAP3K6", "IRAK1", "TGFBR2", "PIK3R3", "PRKCD", "GALK1", "CDK2", "DCLK1", "WNK1", "FGR", "STK17B", "CDK6", "TYRO3", "SPHK1", "RPS6KA2", "PDK4", "IRAK3", "DGKD", "FES", "MUSK", "AURKA", "HIPK2", "FGFRL1", "JAK1", "PFKFB3", "MAP2K1", "TEK", "YES1", "MAP…
247	MAPK signaling pathway%KEGG%hsa04010	5.81213e-11	7.7699e-10	0.851339	0.392055	2.54408	147	c("CACNA2D3", "FGF7", "PLA2G2A", "PDGFRA", "FGF12", "MAP3K8", "MYC", "IL1R1", "HSPA6", "PPP3CC", "MAP3K6", "TGFBR2", "ATF4", "DUSP2", "NGF", "DUSP1", "IL1R2", "GADD45B", "TNFRSF1A", "CACNA2D4", "HSPA1B", "RPS6KA2", "GRB2", "GNG12", "ELK4", "MAP2K1", "MAPK13", "DAXX", "PLA2G5", "CD14", "DUSP5", "RPS6KA1", "PAK2", "MAPKAPK3", "PDGFRB", "MAP2K4", "FGF11", "RAC2", "NFKB1", "ELK1", "RAP1B", "MAPK8IP3"…
248	NEGATIVE REGULATION OF NITROGEN COMPOUND METABOLIC PROCESS%GO%GO:0051172	6.67788e-11	8.89128e-10	0.839089	0.311602	2.18907	318	c("BMP7", "BLM", "TSPYL2", "CD38", "OSR1", "HEY2", "ENO1", "IRF8", "BCL6", "PPARG", "LRP8", "MYC", "STAT3", "ACVRL1", "EDN1", "TCF21", "TGIF1", "GABBR2", "NRIP1", "DAB2", "GLA", "SPI1", "PTGIS", "ZNF703", "PID1", "IRF1", "RUNX3", "BCL3", "PER1", "SNAI2", "MLX", "ZBTB16", "UHRF1", "NF2", "WNT5A", "ZFP36", "PAWR", "NKX3-1", "USP2", "RARA", "ZNF593", "SOX11", "ELK4", "UBE2D3", "NKX2-5", "IFI16", "NR…
249	Complement and coagulation cascades%KEGG%hsa04610	6.86709e-11	9.10647e-10	0.839089	0.599969	2.99849	40	c("C3", "CFD", "F13A1", "F5", "C1R", "TFPI", "F8", "C1QC", "PLAU", "SERPINA1", "CD59", "C3AR1", "C1S", "C7", "SERPINE1", "C1QA", "C1QB", "C5AR1", "CD55", "C2", "PLAUR", "SERPING1", "VWF", "CFI", "C6", "CR1", "SERPINA5", "THBD", "A2M")
250	CYTOSOLIC RIBOSOME%GO%GO:0022626	7.04779e-11	9.28172e-10	0.839089	0.473054	2.77483	79	c("RPS27", "DDX3X", "RPLP0", "RPS19", "RPL34", "RPL27A", "RPS5", "RPL29", "RPL18", "RPS18", "RPL24", "RPL13", "RPS17", "RPS3", "RPL35", "RPS15A", "RPS2", "RPS28", "RPSA", "RPL41", "RPLP2", "RPL18A", "RPS10", "RPL12", "RPS9", "RPL36A", "RPS6", "RPL21", "RPL28", "RPL26", "RPS12", "RPL37A", "RPL38", "RPL10A", "FXR2", "RPS15", "RPL17", "RPL36", "RPL13A", "RPL4", "RPS16", "RPL27", "RPL11", "RPL39", "R…
251	STRUCTURAL MOLECULE ACTIVITY%GO%GO:0005198	7.07489e-11	9.28172e-10	0.839089	0.36324	2.44659	198	c("MYH6", "ANKRD2", "KLHL3", "MYOT", "TUBA1C", "LAD1", "MYL4", "EPB41L3", "TUBG1", "TUBA1B", "CD4", "TUBB", "CLTC", "MYL3", "RPLP0", "ACTG1", "FBLN1", "COL5A3", "RPS19", "EPB41L4B", "MAP1B", "COL4A4", "MAL", "MYBPC3", "RPL34", "LMNA", "RPL27A", "TFPI2", "RPS5", "MPZL1", "RPL29", "ARPC1B", "RPL18", "RPS18", "ITSN1", "ARPC3", "MYL6", "CDC42SE2", "RPL24", "RPL13", "ANXA1", "RPS17", "RPS3", "NUP205",…
252	ACTIVATED TLR4 SIGNALLING%REACTOME%REACT_6890.10	7.08357e-11	9.28172e-10	0.839089	0.497427	2.8665	71	c("BIRC3", "TLR4", "TLR2", "BTK", "IL6R", "IRAK1", "NOD2", "LY96", "RPS6KA2", "IRAK3", "JAK1", "UBE2D3", "MAP2K1", "S100A12", "RIPK2", "PPP2CB", "NFKBIA", "NFKBIB", "CD14", "RPS6KA1", "RIPK1", "MAPKAPK3", "IRAK4", "MYD88", "RIPK3", "MAP2K4", "NFKB1", "ELK1", "DUSP7", "FADD", "TICAM2", "TLR6", "CHUK", "MAP2K3", "JUN", "PELI1", "RELA", "SIGIRR", "FOS", "BIRC2", "MAP2K2", "IL6", "ECSIT", "MAPK7", "U…
253	SIGNALING RECEPTOR ACTIVITY%GO%GO:0038023	7.45777e-11	9.73342e-10	0.839089	0.326878	2.26449	261	c("S1PR3", "FPR1", "OSMR", "PDGFRA", "IL15RA", "LILRB5", "CCR1", "PPARG", "LRP8", "STAT3", "CSF1R", "IL1R1", "TLR4", "IL1RL1", "EBP", "IL17RA", "EFEMP1", "ACVRL1", "TGFBR3", "TLR2", "CD86", "MARCO", "C3AR1", "AKR1C2", "IL6R", "TGFBR2", "OPN3", "SELE", "HLA-DRA", "GPR34", "PTPRU", "IGSF6", "AGTR1", "RAMP1", "PTPRG", "LY96", "EBI3", "CD44", "IL1R2", "NR4A3", "TNFRSF10A", "C5AR1", "CD4", "IL17RB", "…
254	CARBOHYDRATE DERIVATIVE BIOSYNTHETIC PROCESS%GO%GO:1901137	7.75023e-11	1.00753e-09	0.839089	0.347301	2.35741	212	c("GFPT2", "PTDSS1", "CHST7", "ALG3", "NANS", "HAS2", "CHST9", "UAP1", "MPDU1", "PLSCR1", "ADA", "G6PD", "TKT", "RPN1", "ALDOA", "MCFD2", "PAPSS2", "MAGT1", "CHSY1", "ST3GAL1", "EDEM2", "TK1", "GNPNAT1", "B4GALT6", "CSPG4", "SLC25A13", "UGP2", "MGAT4A", "PIGA", "HS3ST2", "PMM2", "RPN2", "ALG8", "PLAUR", "MAN1A1", "PIGH", "PIGT", "UST", "DSE", "ALG5", "SEC24D", "ART4", "UGCG", "NPC1", "B4GALT3", "…
255	CHEMICAL HOMEOSTASIS%GO%GO:0048878	8.53011e-11	1.10457e-09	0.839089	0.331536	2.28237	242	c("HK2", "ATP2A2", "APOB", "CCL11", "S1PR3", "S100A9", "HK3", "PDGFRA", "SLC11A1", "ANGPTL4", "SLC9A7", "S100A8", "CCR1", "HAS2", "PPARG", "MYC", "STAT3", "HMOX1", "EDN1", "AQP4", "ABCG1", "C3AR1", "AQP9", "HIF1A", "SCARA5", "TFRC", "CCL21", "SLC7A8", "SLC4A3", "EPB41L3", "SLC39A14", "AGTR1", "PID1", "BCL2L1", "P2RY2", "NGFR", "STEAP3", "GNA15", "SLC11A2", "PDK4", "HYAL2", "MT2A", "SOD2", "CD55",…
256	VIRAL INFECTIOUS CYCLE%GO%GO:0019058	8.62489e-11	1.11248e-09	0.839089	0.441685	2.67467	96	c("CCL2", "CD209", "RPS27", "RPLP0", "RPS19", "RPL34", "RPL27A", "RPS5", "RPL29", "RPL18", "RPS18", "FURIN", "RPL24", "RPL13", "LRSAM1", "RPS17", "RPS3", "RPL35", "RPS15A", "RPS2", "RPS28", "RPSA", "RPL41", "RPLP2", "RPL18A", "RPS10", "RPL12", "RPS9", "RPL36A", "RPS6", "RPL21", "RPL28", "RPL26", "RPS12", "RPL37A", "RPL38", "RPL10A", "PPIA", "RPS15", "RPL17", "VPS37B", "RPL36", "RPL13A", "KPNB1", …
257	REGULATION OF LOCOMOTION%GO%GO:0040012	8.72509e-11	1.11668e-09	0.839089	0.360628	2.41186	186	c("CCL2", "CCL11", "FGF7", "PDGFRA", "NCKAP1L", "CCR1", "HAS2", "CSF1R", "HMOX1", "PLAU", "ACVRL1", "EDN1", "HIF1A", "IL6R", "CCL21", "THBS1", "IFITM2", "SPATA13", "PTPRU", "CLIC4", "SERPINE1", "ZNF703", "FGR", "RNF41", "CDK6", "SNAI2", "SPHK1", "TIMP1", "NF2", "WNT5A", "AIF1", "ANXA3", "HYAL2", "ANGPT2", "IFITM1", "FES", "CXCL16", "CD74", "LMNA", "PYCARD", "TEK", "IFITM3", "PTEN", "RARRES2", "CS…
258	TNFALPHA%NETPATH%TNFALPHA	8.72509e-11	1.11668e-09	0.839089	0.367401	2.44739	179	c("FKBP5", "BIRC3", "SYK", "MAP3K8", "GLUL", "CYBA", "PRKCD", "NFKBIZ", "DDX3X", "BCL2L1", "KPNA2", "TNFRSF1A", "BCL3", "PAPOLA", "HSPA1B", "GRB2", "BID", "USP2", "UBE2D3", "MAP2K1", "PYGL", "TNFRSF1B", "ALPL", "NFKBIA", "NFKBIB", "YWHAH", "CRYAB", "CAV1", "ITCH", "SMARCA4", "HSP90AA1", "RXRA", "RIPK1", "YWHAZ", "TXN", "CFL1", "CSNK2A1", "RIPK3", "MAP2K4", "PPP6C", "NFKB1", "CASP7", "AKAP8", "NSM…
259	CYTOPLASMIC VESICLE MEMBRANE%GO%GO:0030659	8.96484e-11	1.14293e-09	0.839089	0.44539	2.71567	98	c("APOB", "SLC11A1", "CYBB", "CYBA", "VAMP8", "HLA-DRA", "MCFD2", "TMED3", "B2M", "NOSTRIN", "PICALM", "CLTC", "ECE2", "ANXA3", "NCALD", "CD63", "CD74", "HLA-DPA1", "GPR89B", "SEC24D", "CAV1", "AP1B1", "HLA-DRB4", "TMED2", "ITGB3", "HLA-E", "GPR89A", "ATP6V0A2", "ICA1", "HLA-DPB1", "AP2S1", "ATP6V0A1", "HLA-A", "TCIRG1", "PICK1", "ATP6V0C", "AP1G1", "SERPINA5", "COPB2", "ABCC4", "HLA-B", "DNAJC5"…
260	INFLUENZA INFECTION%REACTOME%REACT_6167.4	9.74864e-11	1.23808e-09	0.839089	0.429774	2.66738	109	c("RPS27", "HSPA1B", "RPLP0", "RPS19", "RPL34", "RPL27A", "RPS5", "RPL29", "RPL18", "RPS18", "RPL24", "RPL13", "DNAJC3", "RPS17", "RPS3", "NUP205", "RPL35", "RPS15A", "IPO5", "RPS2", "HSP90AA1", "RPS28", "RPSA", "RPL41", "RPLP2", "RPL18A", "RPS10", "NUP35", "RPL12", "RPS9", "RPL36A", "RPS6", "RPL21", "RPL28", "CALR", "RPL26", "NUP93", "RPS12", "RPL37A", "RPL38", "RPL10A", "RPS15", "RPL17", "RPL36…
261	TRANSMEMBRANE TRANSPORT OF SMALL MOLECULES%REACTOME%REACT_15518.2	1.08746e-10	1.37578e-09	0.839089	0.343906	2.36142	231	c("HK2", "ATP2A2", "SLCO4A1", "SLC2A1", "ATP1B3", "ATP1B1", "SLC2A3", "SLC1A5", "HK3", "ATP1A1", "SLC5A1", "SLC11A1", "SLC9A7", "WNK3", "SLC38A1", "HMOX1", "ADCY3", "SLC9A9", "SLC1A3", "SLC36A1", "AQP4", "SLC44A3", "ABCG1", "AQP9", "SLC38A2", "TFRC", "SLC4A7", "PRKAR2A", "SLC7A8", "SLC39A8", "SLC6A6", "SLC4A3", "SLC29A2", "SLC2A5", "SLCO2A1", "SLC39A14", "TSC22D3", "ABCC3", "ATP11C", "SLC31A1", "…
262	PROTEIN KINASE ACTIVITY%GO%GO:0004672	1.12665e-10	1.41992e-09	0.839089	0.338274	2.30606	218	c("CCL2", "MARK3", "SYK", "PDGFRA", "TGFA", "PIM1", "MAP3K8", "WNK3", "CDKN1A", "CSF1R", "GRK5", "EFEMP1", "ACVRL1", "TGFBR3", "BTK", "MAP3K6", "IRAK1", "TGFBR2", "PRKCD", "CDK2", "DCLK1", "WNK1", "FGR", "STK17B", "CDK6", "TYRO3", "RPS6KA2", "PDK4", "IRAK3", "FES", "MUSK", "AURKA", "HIPK2", "FGFRL1", "JAK1", "MAP2K1", "TEK", "YES1", "MAPK13", "CSNK1A1", "CCL8", "RPS6KB2", "NEK6", "MET", "EEF2K", …
263	VESICLE MEMBRANE%GO%GO:0012506	1.16817e-10	1.46665e-09	0.826657	0.437923	2.68855	101	c("APOB", "SLC11A1", "CYBB", "CYBA", "VAMP8", "HLA-DRA", "MCFD2", "TMED3", "B2M", "NOSTRIN", "PICALM", "CLTC", "ECE2", "ANXA3", "NCALD", "CD63", "CD74", "HLA-DPA1", "GPR89B", "SEC24D", "CLCN3", "CAV1", "AP1B1", "HLA-DRB4", "TMED2", "ITGB3", "HLA-E", "GPR89A", "ATP6V0A2", "ICA1", "HLA-DPB1", "AP2S1", "ATP6V0A1", "HLA-A", "TCIRG1", "PICK1", "ATP6V0C", "AP1G1", "SERPINA5", "COPB2", "ABCC4", "HLA-B",…
264	REGULATION OF VESICLE-MEDIATED TRANSPORT%GO%GO:0060627	1.18477e-10	1.48186e-09	0.826657	0.49442	2.84917	71	c("CCL2", "SYK", "DOCK2", "NCKAP1L", "SLC11A1", "CCL21", "STXBP2", "SELE", "ANXA2", "GAS1", "DAB2", "SERPINE1", "FGR", "MERTK", "PICALM", "FES", "SYTL4", "PYCARD", "MAP2K1", "NR1H2", "LRSAM1", "ANXA1", "EXPH5", "CAMK1D", "RAB5A", "AP2S1", "GATA2", "LYN", "NR1H3", "ANGPT1", "HCK", "PTPN1", "CALR", "RAB27A", "RAB9A", "ACSL3", "CSK", "PPT1", "LILRB1", "ADIPOQ", "RALB", "MAP2K2", "DKK1", "SNX17", "ST…
265	FORMATION OF A POOL OF FREE 40S SUBUNITS%REACTOME%REACT_1797.1	1.43343e-10	1.78611e-09	0.826657	0.464757	2.75218	83	c("RPS27", "RPLP0", "RPS19", "RPL34", "RPL27A", "RPS5", "RPL29", "RPL18", "RPS18", "RPL24", "RPL13", "RPS17", "RPS3", "RPL35", "EIF3B", "RPS15A", "RPS2", "EIF1AX", "RPS28", "RPSA", "RPL41", "RPLP2", "RPL18A", "RPS10", "RPL12", "EIF3J", "RPS9", "RPL36A", "RPS6", "RPL21", "RPL28", "RPL26", "RPS12", "RPL37A", "RPL38", "RPL10A", "EIF3I", "RPS15", "RPL17", "RPL36", "RPL13A", "RPL4", "RPS16", "RPL27", …
266	INNATE IMMUNE RESPONSE-ACTIVATING SIGNAL TRANSDUCTION%GO%GO:0002758	1.50031e-10	1.86241e-09	0.826657	0.49272	2.83268	70	c("TLR4", "TLR2", "BTK", "MARCO", "IRAK1", "NOD2", "LY96", "UNC93B1", "RPS6KA2", "IRAK3", "CLEC7A", "PIK3AP1", "MAP2K1", "RIPK2", "NFKBIA", "NFKBIB", "TRIM5", "ITCH", "CD14", "RPS6KA1", "RIPK1", "MAPKAPK3", "IRAK4", "MYD88", "MAP2K4", "NFKB1", "HCK", "ELK1", "DUSP7", "TLR5", "TICAM2", "TLR6", "TNIP2", "CHUK", "MAP2K3", "JUN", "PELI1", "RELA", "FOS", "MAP2K2", "MAPK7", "UBA52", "IRAK2", "MAPK9", "…
267	ANTIGEN PROCESSING AND PRESENTATION OF PEPTIDE ANTIGEN VIA MHC CLASS I%GO%GO:0002474	1.59643e-10	1.97431e-09	0.826657	0.495231	2.81741	67	c("IFI30", "CYBB", "CYBA", "SEC61A1", "CTSS", "PSME2", "B2M", "PSMD8", "PSMB8", "TAP1", "NCF4", "NCF1", "SEC24D", "PSME4", "SEC61B", "PSMA4", "HLA-E", "PSME1", "PSMA6", "PSMB6", "ERAP2", "CALR", "PSMD14", "PSMA3", "HLA-A", "PSMD2", "TAP2", "PSMA5", "PSMD12", "NCF2", "HLA-B", "FCGR1A", "PSMD13", "PSME3", "FCGR1B", "PSMB3", "SEC61G", "SEC23A", "SEC24A", "BCAP31", "PSMB5", "UBA52", "PSMC3", "PSMB9",…
268	REPRODUCTION%GO%GO:0000003	1.63607e-10	2.01579e-09	0.826657	0.317227	2.20694	278	c("CORIN", "CCL2", "PDGFRA", "CD209", "STAT3", "TCF21", "RPS27", "TOB2", "MAFF", "TUBG1", "CDK2", "CD4", "SPP1", "TDRD9", "SPA17", "TYRO3", "WNT5A", "RPLP0", "HYAL2", "RPS19", "DERL1", "HIPK2", "NKX3-1", "AKR1C3", "RPL34", "FZD5", "TAP1", "RPL27A", "RPS5", "RPL29", "RPL18", "RPS18", "FURIN", "MSH6", "RPL24", "RPL13", "LRSAM1", "RPS17", "RPS3", "RPL35", "ITCH", "RPS15A", "SFRP5", "CSF1", "RPS2", "…
269	TCR%NETPATH%TCR	1.66064e-10	2.03846e-09	0.826657	0.373595	2.45788	164	c("SLA", "LDHA", "SYK", "DOCK2", "ATP1A1", "WAS", "MAP3K8", "CD86", "NEDD9", "ADA", "SKAP2", "TFRC", "G6PD", "PRKCD", "ANXA2", "DDX3X", "SDCBP", "GIT2", "WDR1", "CD4", "TUBB", "CLTC", "CBLB", "GRB2", "AHCY", "ARHGDIB", "PIK3AP1", "ACLY", "PSTPIP1", "MALT1", "MAP2K1", "RIPK2", "MPZL1", "DOK2", "NFKBIA", "NFKBIB", "ITCH", "TUBA1A", "LCP2", "EIF3M", "PARD3", "YWHAZ", "DNAJB1", "CD82", "LYN", "NFKB1"…
270	ORGANONITROGEN COMPOUND BIOSYNTHETIC PROCESS%GO%GO:1901566	1.71445e-10	2.09169e-09	0.826657	0.354903	2.38628	194	c("ARG2", "SGPP2", "AMD1", "PTDSS1", "CHST7", "CHPT1", "CDS1", "HAS2", "CHST9", "PLSCR1", "GPT2", "GLUL", "SHMT1", "SLC44A3", "ADA", "ASS1", "ALDOA", "ALOX5AP", "PAPSS2", "SAT1", "CHSY1", "ST3GAL1", "ASNS", "TK1", "B4GALT6", "CSPG4", "SPHK1", "CNDP2", "SGMS2", "GCLM", "SLC25A13", "HS3ST2", "EIF5A", "PSAT1", "ABCB6", "PAICS", "GPT", "MOCS1", "UST", "DSE", "FURIN", "PNMT", "MOCOS", "LPIN2", "PPAT",…
271	Pathogenic Escherichia coli infection%KEGG%hsa05130	1.71668e-10	2.09169e-09	0.826657	0.587716	2.96253	41	c("TUBA3E", "TUBA3D", "WAS", "TUBA1C", "HCLS1", "TLR4", "LY96", "TUBA1B", "TUBB", "ACTG1", "TUBB2A", "ARPC1B", "ITGB1", "ARPC3", "ARPC5", "ARPC4", "TUBA1A", "TUBB6", "TUBB2B", "CD14", "YWHAZ", "TUBA3C", "TUBA4A", "TUBB3", "TLR5", "ARPC5L", "ARPC2", "CDC42", "ACTB", "CTTN", "RHOA")
272	CELL CYCLE, MITOTIC%REACTOME%REACT_152.6	1.96916e-10	2.39051e-09	0.826657	0.36303	2.41869	180	c("MYC", "CDKN1A", "PCNT", "RPS27", "E2F5", "TUBG1", "PPP2R5A", "CDK2", "PSME2", "PSMD8", "TUBB", "CDK6", "PPP1CC", "PSMB8", "AURKA", "CDC7", "POLA2", "PPP2CB", "CLIP1", "AHCTF1", "RANGAP1", "SPC24", "RAB8A", "NEK6", "PSME4", "E2F4", "KIF20A", "TUBA1A", "PSMA4", "HSP90AA1", "PSME1", "PSMA6", "LMNB1", "CSNK2A1", "PSMB6", "KIF2A", "CCND3", "CENPE", "PSMD14", "PSMA3", "TUBA4A", "CDC25B", "SSNA1", "N…
273	SUBSTRATE-SPECIFIC TRANSMEMBRANE TRANSPORTER ACTIVITY%GO%GO:0022891	1.98876e-10	2.40545e-09	0.826657	0.335849	2.29151	220	c("AZGP1", "ATP2A2", "SLC2A1", "SLC1A5", "KCNIP2", "KCNK1", "ATP1A1", "SLC5A1", "PLP2", "PDPN", "SLC11A1", "SLC9A7", "SLC38A1", "SLC1A3", "HCN4", "AQP4", "ABCG1", "AQP9", "KCNJ8", "SLC4A7", "SLC7A8", "SLC4A3", "SLC39A14", "CLIC4", "ABCC3", "KCNH2", "MAGT1", "KCNK3", "SLCO2B1", "SLC11A2", "HVCN1", "P2RX5", "SLC25A13", "GRIK2", "TAP1", "SLC1A1", "SLC36A2", "GPR89B", "GRIN3A", "PDE2A", "KCNN2", "SLC…
274	CELL PROJECTION ORGANIZATION%GO%GO:0030030	2.1069e-10	2.52981e-09	0.826657	0.331068	2.27923	241	c("BMP7", "FGD2", "PARVB", "TYROBP", "CHL1", "CSF1R", "PLEK", "PCNT", "CCL21", "ITGA5", "SPATA13", "EPB41L3", "SDCBP", "ITGA2", "RTN4RL1", "ABLIM3", "RPS6KA2", "CLTC", "WNT5A", "GRB2", "AIF1", "ACTG1", "PLXNB1", "CORO1A", "FES", "COL4A4", "NTN1", "CAP1", "FZD5", "RPGR", "MAP2K1", "STIP1", "TRIO", "PARVA", "COL5A1", "PTEN", "RHOB", "ITGB1", "COL6A3", "RAB8A", "MYL6", "KCNQ3", "MET", "BTG2", "UHMK1…
275	NEGATIVE REGULATION OF NUCLEOBASE-CONTAINING COMPOUND METABOLIC PROCESS%GO%GO:0045934	2.1069e-10	2.52981e-09	0.826657	0.311122	2.18287	313	c("BMP7", "BLM", "TSPYL2", "CD38", "OSR1", "HEY2", "ENO1", "IRF8", "BCL6", "PPARG", "LRP8", "MYC", "STAT3", "ACVRL1", "EDN1", "TCF21", "TGIF1", "GABBR2", "NRIP1", "DAB2", "SPI1", "ZNF703", "PID1", "IRF1", "RUNX3", "BCL3", "PER1", "SNAI2", "MLX", "ZBTB16", "UHRF1", "NF2", "WNT5A", "ZFP36", "PAWR", "NKX3-1", "USP2", "RARA", "ZNF593", "SOX11", "ELK4", "UBE2D3", "NKX2-5", "IFI16", "NR1H2", "IFITM3", …
276	NEGATIVE REGULATION OF TRANSCRIPTION, DNA-DEPENDENT%GO%GO:0045892	2.22504e-10	2.66198e-09	0.826657	0.316525	2.19507	268	c("BMP7", "CD38", "OSR1", "HEY2", "ENO1", "IRF8", "BCL6", "PPARG", "LRP8", "MYC", "STAT3", "EDN1", "TCF21", "TGIF1", "NRIP1", "DAB2", "SPI1", "ZNF703", "IRF1", "RUNX3", "BCL3", "PER1", "SNAI2", "MLX", "ZBTB16", "UHRF1", "WNT5A", "ZFP36", "PAWR", "NKX3-1", "USP2", "RARA", "ZNF593", "SOX11", "ELK4", "UBE2D3", "NKX2-5", "IFI16", "NR1H2", "HDGF", "PDE2A", "EDNRB", "SBNO2", "ZNF189", "CAV1", "DAXX", "…
277	METABOLISM OF LIPIDS AND LIPOPROTEINS%REACTOME%REACT_22258.2	2.3038e-10	2.74626e-09	0.826657	0.318722	2.21437	274	c("LPCAT3", "APOB", "SGPP2", "PLA2G2A", "PTDSS1", "GGT5", "CHPT1", "CDS1", "ANGPTL4", "PPARG", "CEL", "ABHD5", "EBP", "ALOX5", "GPD1", "SLC44A3", "ABCG1", "P4HB", "ARNTL", "PIK3R3", "TBXAS1", "TEAD2", "GLIPR1", "ALOX5AP", "GLA", "ETNK2", "ABCC3", "PDSS1", "IDH1", "PTGIS", "TNFRSF21", "FABP6", "LPCAT4", "FASN", "ACACB", "SPHK1", "ACSL5", "SGMS2", "PPP1CC", "PMVK", "HMGCS2", "NPAS2", "PSAP", "TXNRD…
278	SIGNALING BY INTERLEUKINS%REACTOME%REACT_22232.2	2.46128e-10	2.92343e-09	0.814036	0.488832	2.81697	71	c("SOCS3", "SYK", "MAP3K8", "STAT3", "IL1R1", "IL6R", "IRAK1", "PIK3R3", "NOD2", "IL1R2", "CSF2RA", "IRAK3", "JAK1", "IL2RA", "MAP2K1", "RIPK2", "YES1", "YWHAZ", "IRAK4", "MYD88", "MAP2K4", "LYN", "NFKB1", "HCK", "INPP5D", "IL6ST", "NRAS", "TNIP2", "CHUK", "PELI1", "RELA", "SHC1", "MAP2K2", "IL6", "YWHAB", "IL2RG", "PTPN6", "SOS1", "KRAS", "IRAK2", "CRKL", "CASP1", "RAF1", "INPPL1", "NFKB2", "IL1…
279	POSITIVE REGULATION OF INTRACELLULAR PROTEIN KINASE CASCADE%GO%GO:0010740	2.5007e-10	2.95961e-09	0.814036	0.341861	2.32435	215	c("FPR1", "BIRC3", "PDGFRA", "TGFA", "CCR1", "CSF1R", "HCLS1", "TLR4", "HMOX1", "EDN1", "MAP3K6", "AKR1C2", "IL6R", "CCL21", "IRAK1", "THBS1", "NOD2", "CD44", "SDCBP", "LITAF", "C5AR1", "LTBR", "TNFRSF1A", "NDFIP2", "WNT5A", "WWC1", "LPAR1", "HIPK2", "AKR1C3", "CD74", "MALT1", "PYCARD", "MAP2K1", "S100A4", "S100A12", "TEK", "RIPK2", "GPR89B", "ARL2BP", "TRIM5", "NEK6", "PIK3R5", "DAXX", "ECM1", "…
280	REGULATION OF INFLAMMATORY RESPONSE%GO%GO:0050727	2.60812e-10	3.07572e-09	0.814036	0.463776	2.72041	79	c("C3", "PLA2G2A", "S100A9", "BIRC3", "OSMR", "S100A8", "TLR4", "TLR2", "PRKCD", "SELE", "NOD2", "AGTR1", "SERPINE1", "PTGIS", "TNFRSF1A", "TYRO3", "WNT5A", "HYAL2", "RPS19", "CD55", "PIK3AP1", "C2", "S100A12", "TEK", "PDE2A", "SERPING1", "MAPK13", "SBNO2", "GSTP1", "CFI", "PSMA6", "MYD88", "NR1H3", "HCK", "IL6ST", "FEM1A", "NLRP3", "AGT", "CR1", "RELA", "BIRC2", "CFP", "ADIPOQ", "A2M", "IL6", "P…
281	POSITIVE REGULATION OF RNA METABOLIC PROCESS%GO%GO:0051254	2.61884e-10	3.07737e-09	0.814036	0.296359	2.10672	363	c("BMP7", "NAMPT", "BLM", "CD38", "OSR1", "HEY2", "SLC11A1", "SREBF1", "PPARG", "MYC", "STAT3", "HCLS1", "TLR4", "PLSCR1", "SEC14L2", "ACVRL1", "TFE3", "TLR2", "CD86", "HIF1A", "TCF21", "IRAK1", "ARNTL", "ATF4", "E2F5", "NRIP1", "DAB2", "DDX3X", "RORB", "TESC", "SPI1", "SERPINE1", "PID1", "ESRRG", "IRF1", "TNFRSF1A", "BCL3", "IL10", "ZBTB16", "PICALM", "UHRF1", "HSF2", "HNRNPAB", "NCOA7", "WNT5A"…
282	MITOTIC CELL CYCLE%GO%GO:0000278	2.8945e-10	3.38064e-09	0.814036	0.337622	2.30086	217	c("BLM", "EIF4EBP1", "BCAT1", "CDKN1A", "PCNT", "RPS27", "E2F5", "TUBG1", "CDK2", "PSME2", "KPNA2", "PSMD8", "TUBB", "CDK6", "PPP1CC", "PSMB8", "AURKA", "EPS8", "CDC7", "POLA2", "PTEN", "CLIP1", "AHCTF1", "RANGAP1", "SPC24", "PSME4", "E2F4", "KIF20A", "TUBA1A", "PSMA4", "HSP90AA1", "PSME1", "PSMA6", "LSM10", "SEH1L", "PSMB6", "PPP6C", "KIF2A", "ACVR1B", "CENPE", "PSMD14", "PSMA3", "TUBA4A", "CDC2…
283	POSITIVE REGULATION OF TRANSCRIPTION FROM RNA POLYMERASE II PROMOTER%GO%GO:0045944	2.8974e-10	3.38064e-09	0.814036	0.345381	2.32914	202	c("NAMPT", "OSR1", "HEY2", "SLC11A1", "SREBF1", "PPARG", "MYC", "STAT3", "HCLS1", "TLR4", "PLSCR1", "ACVRL1", "TFE3", "TLR2", "HIF1A", "TCF21", "ARNTL", "ATF4", "E2F5", "NRIP1", "DDX3X", "SPI1", "SERPINE1", "PID1", "TNFRSF1A", "UHRF1", "HSF2", "NCOA7", "WNT5A", "HYAL2", "NPAS2", "HIPK2", "NKX3-1", "RARA", "SOX11", "FZD5", "NKX2-5", "ESRRA", "IFI16", "NR1H2", "RIPK2", "ELF4", "NFKBIA", "ATF6", "LP…
284	REGULATION OF CELL MIGRATION%GO%GO:0030334	3.0914e-10	3.5943e-09	0.814036	0.365577	2.41685	169	c("CCL2", "CCL11", "FGF7", "PDGFRA", "NCKAP1L", "CCR1", "HAS2", "CSF1R", "HMOX1", "PLAU", "ACVRL1", "EDN1", "HIF1A", "IL6R", "CCL21", "THBS1", "SPATA13", "PTPRU", "CLIC4", "SERPINE1", "ZNF703", "FGR", "RNF41", "SNAI2", "SPHK1", "TIMP1", "NF2", "WNT5A", "AIF1", "ANXA3", "HYAL2", "ANGPT2", "IFITM1", "CXCL16", "CD74", "LMNA", "PYCARD", "TEK", "PTEN", "RARRES2", "CSF1", "ITGB3", "CTSH", "CHRD", "CAMK…
285	POSITIVE REGULATION OF PROTEIN KINASE ACTIVITY%GO%GO:0045860	3.13391e-10	3.63094e-09	0.814036	0.35155	2.37013	201	c("CCL2", "FPR1", "ATF3", "NCKAP1L", "TSPYL2", "TGFA", "SLC11A1", "PIM1", "LRP8", "CSF1R", "TLR4", "ADCY3", "EDN1", "MAP3K6", "CCL21", "IRAK1", "THBS1", "PRKAR2A", "TGFBR2", "ATF4", "NOD2", "NGF", "GADD45B", "TNFRSF10A", "ASNS", "C5AR1", "CD4", "SRPRB", "WNT5A", "XBP1", "DNAJB9", "ADD1", "NKX3-1", "MALT1", "LMNA", "MAP2K1", "JTB", "S100A12", "HDGF", "RIPK2", "IQGAP1", "ATF6", "DNAJC3", "PIK3R5", …
286	REGULATION OF I-KAPPAB KINASE/NF-KAPPAB CASCADE%GO%GO:0043122	3.26524e-10	3.76986e-09	0.814036	0.42022	2.60808	109	c("BMP7", "BIRC3", "TLR4", "HMOX1", "TLR2", "CCL21", "IRAK1", "NOD2", "LITAF", "LTBR", "TNFRSF1A", "BCL3", "IL10", "NDFIP2", "SPHK1", "LPAR1", "MALT1", "PYCARD", "S100A4", "S100A12", "RIPK2", "GPR89B", "NFKBIA", "TRIM5", "NEK6", "GSTP1", "ECM1", "CANT1", "GPR89A", "ZC3HAV1", "RIPK1", "TRAF3IP2", "MYD88", "TRIM13", "EEF1D", "ECT2", "NLRP3", "FADD", "SLC20A1", "TICAM2", "TLR6", "TNIP2", "CHUK", "PE…
287	INFLUENZA VIRAL RNA TRANSCRIPTION AND REPLICATION%REACTOME%REACT_6152.2	3.35112e-10	3.85554e-09	0.814036	0.457823	2.72188	84	c("RPS27", "RPLP0", "RPS19", "RPL34", "RPL27A", "RPS5", "RPL29", "RPL18", "RPS18", "RPL24", "RPL13", "DNAJC3", "RPS17", "RPS3", "RPL35", "RPS15A", "IPO5", "RPS2", "HSP90AA1", "RPS28", "RPSA", "RPL41", "RPLP2", "RPL18A", "RPS10", "RPL12", "RPS9", "RPL36A", "RPS6", "RPL21", "RPL28", "RPL26", "RPS12", "RPL37A", "RPL38", "RPL10A", "RPS15", "RPL17", "RPL36", "RPL13A", "RPL4", "RPS16", "RPL27", "RPL11"…
288	ADENYL NUCLEOTIDE BINDING%GO%GO:0030554	3.57468e-10	4.08429e-09	0.814036	0.395911	2.53189	131	c("BLM", "HK3", "PIM1", "WNK3", "PDE4D", "ACVRL1", "BTK", "ABCG1", "MAP3K6", "GALK1", "NME1", "WNK1", "RUNX3", "STK17B", "CDK6", "PAPOLA", "SPHK1", "P2RX5", "PMVK", "PDK4", "IRAK3", "ABCB6", "PNPLA8", "TAP1", "NME1-NME2", "FBP1", "PDE2A", "ABCD3", "PYGL", "MSH6", "NEK6", "MYO1B", "UHMK1", "OXSR1", "HSP90AA1", "PDXK", "SRPK1", "DMPK", "STRADB", "ACVR1B", "CDC42BPA", "PHKG2", "APRT", "NME2", "MTHFD…
289	ADENYL RIBONUCLEOTIDE BINDING%GO%GO:0032559	3.57468e-10	4.08429e-09	0.814036	0.395911	2.53189	131	c("BLM", "HK3", "PIM1", "WNK3", "PDE4D", "ACVRL1", "BTK", "ABCG1", "MAP3K6", "GALK1", "NME1", "WNK1", "RUNX3", "STK17B", "CDK6", "PAPOLA", "SPHK1", "P2RX5", "PMVK", "PDK4", "IRAK3", "ABCB6", "PNPLA8", "TAP1", "NME1-NME2", "FBP1", "PDE2A", "ABCD3", "PYGL", "MSH6", "NEK6", "MYO1B", "UHMK1", "OXSR1", "HSP90AA1", "PDXK", "SRPK1", "DMPK", "STRADB", "ACVR1B", "CDC42BPA", "PHKG2", "APRT", "NME2", "MTHFD…
290	CHEMOTAXIS%GO%GO:0006935	3.68211e-10	4.17812e-09	0.814036	0.332405	2.2775	226	c("CCL2", "CCL11", "FGF7", "S100A9", "SYK", "PDGFRA", "PLP2", "NCKAP1L", "S100A8", "TYROBP", "CCR1", "CHL1", "PLAU", "EDN1", "IL6R", "CCL21", "ITGA5", "CXCL1", "AGTR1", "SDCBP", "ITGA2", "ABLIM3", "FOSL1", "C5AR1", "IL10", "RPS6KA2", "CLTC", "WNT5A", "ITGB2", "GRB2", "ACTG1", "PLXNB1", "CORO1A", "RPS19", "FES", "RNASE2", "COL4A4", "NTN1", "CAP1", "CXCL16", "PLAUR", "MAP2K1", "STIP1", "S100A12", "…
291	TAXIS%GO%GO:0042330	3.68211e-10	4.17812e-09	0.814036	0.332405	2.2775	226	c("CCL2", "CCL11", "FGF7", "S100A9", "SYK", "PDGFRA", "PLP2", "NCKAP1L", "S100A8", "TYROBP", "CCR1", "CHL1", "PLAU", "EDN1", "IL6R", "CCL21", "ITGA5", "CXCL1", "AGTR1", "SDCBP", "ITGA2", "ABLIM3", "FOSL1", "C5AR1", "IL10", "RPS6KA2", "CLTC", "WNT5A", "ITGB2", "GRB2", "ACTG1", "PLXNB1", "CORO1A", "RPS19", "FES", "RNASE2", "COL4A4", "NTN1", "CAP1", "CXCL16", "PLAUR", "MAP2K1", "STIP1", "S100A12", "…
292	MYD88:MAL CASCADE INITIATED ON PLASMA MEMBRANE%REACTOME%REACT_6788.8	3.82858e-10	4.28327e-09	0.814036	0.513924	2.83021	58	c("TLR4", "TLR2", "BTK", "IL6R", "IRAK1", "NOD2", "LY96", "RPS6KA2", "IRAK3", "JAK1", "MAP2K1", "S100A12", "RIPK2", "PPP2CB", "NFKBIA", "NFKBIB", "CD14", "RPS6KA1", "MAPKAPK3", "IRAK4", "MYD88", "MAP2K4", "NFKB1", "ELK1", "DUSP7", "TLR6", "CHUK", "MAP2K3", "JUN", "PELI1", "RELA", "SIGIRR", "FOS", "MAP2K2", "IL6", "ECSIT", "MAPK7", "UBA52", "IRAK2", "MAPK9", "NFKB2", "TMEM189-UBE2V1", "MAPKAPK2", …
293	TOLL LIKE RECEPTOR 2 (TLR2) CASCADE%REACTOME%REACT_7980.9	3.82858e-10	4.28327e-09	0.814036	0.513924	2.83021	58	c("TLR4", "TLR2", "BTK", "IL6R", "IRAK1", "NOD2", "LY96", "RPS6KA2", "IRAK3", "JAK1", "MAP2K1", "S100A12", "RIPK2", "PPP2CB", "NFKBIA", "NFKBIB", "CD14", "RPS6KA1", "MAPKAPK3", "IRAK4", "MYD88", "MAP2K4", "NFKB1", "ELK1", "DUSP7", "TLR6", "CHUK", "MAP2K3", "JUN", "PELI1", "RELA", "SIGIRR", "FOS", "MAP2K2", "IL6", "ECSIT", "MAPK7", "UBA52", "IRAK2", "MAPK9", "NFKB2", "TMEM189-UBE2V1", "MAPKAPK2", …
294	TOLL LIKE RECEPTOR TLR1:TLR2 CASCADE%REACTOME%REACT_8005.8	3.82858e-10	4.28327e-09	0.814036	0.513924	2.83021	58	c("TLR4", "TLR2", "BTK", "IL6R", "IRAK1", "NOD2", "LY96", "RPS6KA2", "IRAK3", "JAK1", "MAP2K1", "S100A12", "RIPK2", "PPP2CB", "NFKBIA", "NFKBIB", "CD14", "RPS6KA1", "MAPKAPK3", "IRAK4", "MYD88", "MAP2K4", "NFKB1", "ELK1", "DUSP7", "TLR6", "CHUK", "MAP2K3", "JUN", "PELI1", "RELA", "SIGIRR", "FOS", "MAP2K2", "IL6", "ECSIT", "MAPK7", "UBA52", "IRAK2", "MAPK9", "NFKB2", "TMEM189-UBE2V1", "MAPKAPK2", …
295	TOLL LIKE RECEPTOR TLR6:TLR2 CASCADE%REACTOME%REACT_8006.8	3.82858e-10	4.28327e-09	0.814036	0.513924	2.83021	58	c("TLR4", "TLR2", "BTK", "IL6R", "IRAK1", "NOD2", "LY96", "RPS6KA2", "IRAK3", "JAK1", "MAP2K1", "S100A12", "RIPK2", "PPP2CB", "NFKBIA", "NFKBIB", "CD14", "RPS6KA1", "MAPKAPK3", "IRAK4", "MYD88", "MAP2K4", "NFKB1", "ELK1", "DUSP7", "TLR6", "CHUK", "MAP2K3", "JUN", "PELI1", "RELA", "SIGIRR", "FOS", "MAP2K2", "IL6", "ECSIT", "MAPK7", "UBA52", "IRAK2", "MAPK9", "NFKB2", "TMEM189-UBE2V1", "MAPKAPK2", …
296	HOMEOSTATIC PROCESS%GO%GO:0042592	3.83963e-10	4.28327e-09	0.814036	0.303733	2.13287	317	c("CCL2", "HK2", "ATP2A2", "APOB", "CCL11", "S1PR3", "SERPINA3", "S100A9", "HK3", "PDGFRA", "NCKAP1L", "GLRX2", "SLC11A1", "ANGPTL4", "SLC9A7", "S100A8", "CCR1", "HAS2", "PPARG", "MYC", "STAT3", "HCLS1", "TLR4", "HMOX1", "TGFBR3", "EDN1", "AQP4", "ABCG1", "C3AR1", "AQP9", "HIF1A", "SCARA5", "TFRC", "CCL21", "SLC7A8", "G6PD", "SLC4A3", "EPB41L3", "ALDOA", "SLC39A14", "AGTR1", "PID1", "BCL2L1", "P2…
297	REPRODUCTIVE PROCESS%GO%GO:0022414	3.99715e-10	4.44397e-09	0.814036	0.31888	2.20839	259	c("CORIN", "CCL2", "PDGFRA", "CD209", "TCF21", "RPS27", "TOB2", "MAFF", "CD4", "SPP1", "TDRD9", "SPA17", "TYRO3", "WNT5A", "RPLP0", "HYAL2", "RPS19", "DERL1", "HIPK2", "NKX3-1", "AKR1C3", "RPL34", "FZD5", "TAP1", "RPL27A", "RPS5", "RPL29", "RPL18", "RPS18", "FURIN", "RPL24", "RPL13", "LRSAM1", "RPS17", "RPS3", "RPL35", "ITCH", "RPS15A", "SFRP5", "CSF1", "RPS2", "RXRA", "RPS28", "RPSA", "RPL41", "…
298	NEGATIVE REGULATION OF RNA METABOLIC PROCESS%GO%GO:0051253	4.31375e-10	4.76388e-09	0.814036	0.311295	2.16703	284	c("BMP7", "CD38", "OSR1", "HEY2", "ENO1", "IRF8", "BCL6", "PPARG", "LRP8", "MYC", "STAT3", "EDN1", "TCF21", "TGIF1", "NRIP1", "DAB2", "SPI1", "ZNF703", "IRF1", "RUNX3", "BCL3", "PER1", "SNAI2", "MLX", "ZBTB16", "UHRF1", "WNT5A", "ZFP36", "PAWR", "NKX3-1", "USP2", "RARA", "ZNF593", "SOX11", "ELK4", "UBE2D3", "NKX2-5", "IFI16", "NR1H2", "IFITM3", "HDGF", "PDE2A", "EDNRB", "SBNO2", "ZNF189", "CAV1",…
299	NEURON DIFFERENTIATION%GO%GO:0030182	4.31375e-10	4.76388e-09	0.814036	0.33763	2.31562	229	c("BMP7", "KCNIP2", "SPOCK1", "FAIM2", "TYROBP", "STAT3", "CHL1", "AGTPBP1", "DDIT4", "ITGA5", "NR4A2", "EPB41L3", "RORB", "SDCBP", "ITGA2", "RTN4RL1", "ABLIM3", "WNK1", "RUNX3", "MTCH1", "RPS6KA2", "CLTC", "WNT5A", "GRB2", "ACTG1", "PLXNB1", "FES", "COL4A4", "NTN1", "CAP1", "SOX11", "FZD5", "MAP2K1", "STIP1", "TRIO", "COL5A1", "PTEN", "RHOB", "ITGB1", "COL6A3", "RAB8A", "MYL6", "KCNQ3", "MET", "…
300	RIBOSOMAL SUBUNIT%GO%GO:0044391	4.48549e-10	4.93703e-09	0.814036	0.425875	2.60809	100	c("RPS27", "DDX3X", "RPLP0", "RPS19", "RPL34", "MRPL3", "MRPL36", "RPL27A", "RPS5", "RPL29", "RPL18", "RPS18", "RPL24", "RPL13", "RPS17", "RPS3", "RBM3", "RPL35", "MRPS24", "RPS15A", "MRPL41", "RPS2", "MRPS16", "RPS28", "RPSA", "RPL41", "RPLP2", "RPL18A", "RPS10", "RPL12", "RPS9", "RPL36A", "RPS6", "RPL21", "RPL28", "MRPL51", "RPL26", "RPS12", "MRPL23", "RPL37A", "RPL38", "RPL10A", "FXR2", "RPS15…
301	POSITIVE REGULATION OF I-KAPPAB KINASE/NF-KAPPAB CASCADE%GO%GO:0043123	4.74266e-10	5.19597e-09	0.801216	0.454894	2.70446	84	c("BIRC3", "HMOX1", "CCL21", "IRAK1", "NOD2", "LITAF", "LTBR", "TNFRSF1A", "NDFIP2", "LPAR1", "MALT1", "S100A4", "S100A12", "RIPK2", "GPR89B", "TRIM5", "NEK6", "ECM1", "CANT1", "GPR89A", "ZC3HAV1", "RIPK1", "TRAF3IP2", "MYD88", "TRIM13", "EEF1D", "ECT2", "FADD", "SLC20A1", "TICAM2", "TLR6", "TNIP2", "CHUK", "PELI1", "RELA", "APOL3", "BIRC2", "ADIPOQ", "MTDH", "SHISA5", "BST2", "RHOA", "TRADD", "U…
302	ENDOSOMAL PART%GO%GO:0044440	4.75222e-10	5.19597e-09	0.801216	0.439898	2.64441	92	c("APOB", "CTSB", "SLC11A1", "SLC9A7", "TLR4", "SLC9A9", "IRAK1", "HLA-DRA", "CTSS", "LY96", "B2M", "STEAP3", "TLR8", "SLC11A2", "SCAMP2", "SNX10", "CD63", "RHOB", "EHD1", "TMBIM1", "HLA-DRB4", "CD14", "HLA-E", "RIPK1", "ATP6V0A2", "RAB5A", "IRAK4", "MYD88", "SLC9A6", "RAB27A", "ATP6V0A1", "ECE1", "SNX6", "HLA-A", "RAP2C", "PLEKHF1", "TCIRG1", "TICAM2", "ATP6V0C", "VPS37B", "HLA-B", "ERBB2", "FCG…
303	ENDOSOME MEMBRANE%GO%GO:0010008	4.9868e-10	5.43446e-09	0.801216	0.442115	2.65006	89	c("APOB", "SLC11A1", "SLC9A7", "TLR4", "SLC9A9", "IRAK1", "HLA-DRA", "LY96", "B2M", "STEAP3", "TLR8", "SLC11A2", "SCAMP2", "SNX10", "CD63", "RHOB", "EHD1", "TMBIM1", "HLA-DRB4", "CD14", "HLA-E", "RIPK1", "ATP6V0A2", "RAB5A", "IRAK4", "MYD88", "SLC9A6", "RAB27A", "ATP6V0A1", "ECE1", "SNX6", "HLA-A", "RAP2C", "PLEKHF1", "TCIRG1", "TICAM2", "ATP6V0C", "VPS37B", "HLA-B", "ERBB2", "FCGR1A", "MCOLN1", …
304	MACROMOLECULAR COMPLEX ASSEMBLY%GO%GO:0065003	5.18439e-10	5.63121e-09	0.801216	0.308234	2.15104	300	c("MGST1", "BLM", "APOB", "MID1IP1", "WAS", "NCKAP1L", "GNMT", "FERMT3", "AASS", "REPS2", "HMOX1", "SHMT1", "SKAP2", "CYBA", "SCARA5", "IRAK1", "GPX3", "NOD2", "ALDOA", "ALOX5AP", "DDX3X", "PREX1", "CCT2", "SNRPB", "TK1", "TMEM70", "PICALM", "ACACB", "AIF1", "DDX23", "FERMT2", "SOD2", "DGKD", "RPS19", "SH3GLB1", "AKR1C3", "CD74", "BBS12", "MALT1", "CAPZA1", "TPPP", "TEK", "FBP1", "AHCTF1", "SLC9A…
305	CYTOSOLIC PART%GO%GO:0044445	5.28997e-10	5.72704e-09	0.801216	0.414318	2.55156	103	c("RPS27", "DDX3X", "RPLP0", "RPS19", "RPL34", "PYCARD", "RPL27A", "RPS5", "RPL29", "RPL18", "RPS18", "RPL24", "RPL13", "RPS17", "RPS3", "RPL35", "PIK3R5", "RPS15A", "STX12", "RPS2", "RPS28", "RPSA", "RPL41", "RPLP2", "RPL18A", "RPS10", "RPL12", "PFDN6", "RPS9", "RPL36A", "RPS6", "RPL21", "RPL28", "RPL26", "RPS12", "RPL37A", "RPL38", "RPL10A", "AHR", "FAM96B", "FXR2", "RPS15", "CHUK", "BLOC1S1", …
306	ENDOCYTIC VESICLE%GO%GO:0030139	5.45454e-10	5.88591e-09	0.801216	0.445981	2.65419	85	c("APOB", "SYK", "SLC11A1", "CYBB", "CYBA", "HLA-DRA", "B2M", "UNC93B1", "NOSTRIN", "PICALM", "RAB8B", "CLTC", "CORO1A", "ANXA3", "HYAL2", "LPAR1", "CD74", "HLA-DPA1", "RAB32", "NCF4", "RAB8A", "NCF1", "CAV1", "RAB34", "HLA-DRB4", "STX12", "HLA-E", "LTF", "ATP6V0A2", "HLA-DPB1", "AP2S1", "MTSS1", "RAB9A", "ATP6V0A1", "RAB38", "HLA-A", "TCIRG1", "PICK1", "ATP6V0C", "NCF2", "HLA-B", "IGF2R", "FCGR1…
307	ANTIGEN PROCESSING AND PRESENTATION OF EXOGENOUS PEPTIDE ANTIGEN VIA MHC CLASS I%GO%GO:0042590	5.49644e-10	5.91181e-09	0.801216	0.51088	2.81345	58	c("IFI30", "CYBB", "CYBA", "SEC61A1", "CTSS", "PSME2", "B2M", "PSMD8", "PSMB8", "TAP1", "NCF4", "NCF1", "PSME4", "SEC61B", "PSMA4", "HLA-E", "PSME1", "PSMA6", "PSMB6", "CALR", "PSMD14", "PSMA3", "HLA-A", "PSMD2", "TAP2", "PSMA5", "PSMD12", "NCF2", "HLA-B", "FCGR1A", "PSMD13", "PSME3", "FCGR1B", "PSMB3", "SEC61G", "PSMB5", "UBA52", "PSMC3", "PSMB9", "PSMB1", "PSMA7", "PSMD9", "PSMC4", "PSMD3", "PS…
308	REGULATION OF LEUKOCYTE ACTIVATION%GO%GO:0002694	5.53973e-10	5.93902e-09	0.801216	0.414403	2.57701	112	c("CCL2", "SYK", "NCKAP1L", "CD38", "MAP3K8", "CD209", "SAMSN1", "PLSCR1", "BTK", "CD86", "CCL21", "THBS1", "TGFBR2", "STXBP2", "PIK3R3", "NOD2", "HLA-DRA", "EBI3", "IRF1", "CD276", "FGR", "CD4", "AXL", "IL10", "WNT5A", "GRB2", "AIF1", "LILRB2", "FES", "CD74", "HLA-DPA1", "RARA", "SOX11", "MALT1", "PYCARD", "YES1", "CAV1", "HLA-DRB4", "MNDA", "CD274", "CLCF1", "PAK2", "HLA-DPB1", "LYN", "NR1H3", …
309	CELLULAR COMPONENT DISASSEMBLY%GO%GO:0022411	5.59131e-10	5.97492e-09	0.801216	0.381536	2.47338	146	c("PRKCD", "RPS27", "SMARCD2", "SNAI2", "MMP2", "TIMP1", "RPLP0", "RPS19", "ADD1", "RPL34", "LMNA", "RPL27A", "RPS5", "CTSG", "RPL29", "RPL18", "RPS18", "FURIN", "RPL24", "RPL13", "ETF1", "RPS17", "RPS3", "RPL35", "TPSAB1", "RPS15A", "SMARCA4", "RPS2", "RPS28", "RPSA", "RPL41", "RPLP2", "RPL18A", "RPS10", "PAK2", "RPL12", "LMNB1", "RPS9", "RPL36A", "CASP7", "RPS6", "RPL21", "RPL28", "RPL26", "MMP…
310	PLATELET ACTIVATION, SIGNALING AND AGGREGATION%REACTOME%REACT_798.4	5.76725e-10	6.14305e-09	0.801216	0.402562	2.53104	119	c("CFD", "F13A1", "SYK", "FCER1G", "F5", "SRGN", "F8", "APBB1IP", "PLEK", "SERPINA1", "THBS1", "PIK3R3", "PRKCD", "ALDOA", "SERPINE1", "WDR1", "GNA15", "TIMP1", "DGKD", "PSAP", "GNG12", "CD63", "CAP1", "GNA13", "RHOB", "SERPING1", "PIK3R5", "ITPR3", "VWF", "LCP2", "FN1", "ITGB3", "YWHAZ", "CFL1", "RAPGEF3", "F2RL3", "LYN", "RAC2", "PTPN1", "RAP1B", "TUBA4A", "DAGLB", "PRKCH", "DGKA", "CALU", "CSK…
311	NGF SIGNALLING VIA TRKA FROM THE PLASMA MEMBRANE%REACTOME%REACT_12056.5	6.12232e-10	6.50029e-09	0.801216	0.42698	2.58562	96	c("FGF7", "PDGFRA", "STAT3", "CDKN1A", "ADCY3", "CD86", "IL6R", "PRKAR2A", "PIK3R3", "PRKCD", "NGF", "RPS6KA2", "JAK1", "MAP2K1", "PPP2CB", "PTEN", "BAD", "MAPK13", "RPS6KB2", "ITPR3", "RPS6KA1", "MAPKAPK3", "PDGFRB", "AP2S1", "ADCY1", "ELK1", "DUSP7", "NR4A1", "IRS2", "NRAS", "CHUK", "SHC1", "CALM2", "ERBB2", "FOXO3", "RALB", "MAP2K2", "IL6", "RHOA", "ADCY7", "DNM2", "CLTA", "YWHAB", "MAPK7", "S…
312	LEUKOCYTE MIGRATION%GO%GO:0050900	6.25081e-10	6.61544e-09	0.801216	0.409396	2.55328	113	c("CCL2", "GRB14", "APOB", "CCL11", "ATP1B3", "ATP1B1", "S100A9", "SYK", "FCER1G", "NCKAP1L", "S100A8", "CCR1", "CD58", "EDN1", "IL6R", "CCL21", "SLC7A8", "ITGAM", "ITGA5", "SELE", "MERTK", "IL10", "ITGB2", "GRB2", "CORO1A", "ITGA3", "ANGPT2", "RPS19", "EPS8", "CXCL16", "S100A12", "TEK", "DOK2", "ITGB1", "SLC3A2", "EDNRB", "YES1", "CAV1", "FN1", "SLC7A7", "ITGB3", "SLC7A5", "SLC16A3", "LYN", "ANG…
313	CELLULAR MEMBRANE ORGANIZATION%GO%GO:0016044	6.30509e-10	6.65156e-09	0.801216	0.370661	2.42151	156	c("KCNIP2", "NKD2", "PLSCR1", "THBS1", "EPB41L3", "VAMP8", "MYO5A", "TESC", "RAMP1", "GCA", "ATP11C", "BCL2L1", "MTCH1", "PICALM", "CLTC", "AIF1", "FERMT2", "BID", "MUSK", "MAL", "COL5A1", "PTEN", "FTL", "BAD", "RAB8A", "SEC24D", "TMED9", "CAV1", "ATG7", "TXNDC5", "RAB34", "AP1B1", "CAV2", "TMED2", "PLSCR3", "HSP90AA1", "BAK1", "RAMP3", "AP2S1", "DMPK", "SERP1", "PACSIN2", "STOML2", "A4GALT", "PL…
314	CLASS I MHC MEDIATED ANTIGEN PROCESSING & PRESENTATION%REACTOME%REACT_75820.1	6.4637e-10	6.79718e-09	0.801216	0.374937	2.44032	150	c("SOCS3", "CYBB", "CYBA", "SOCS1", "RNF144B", "SEC61A1", "CTSS", "PSME2", "B2M", "RNF41", "PSMD8", "ZBTB16", "CBLB", "RNF19B", "UBE2F", "PSMB8", "UBE2D3", "TAP1", "NCF4", "TRIM37", "NCF1", "SEC24D", "LRSAM1", "PSME4", "SEC61B", "ATG7", "UBE2V2", "ITCH", "FBXO6", "PSMA4", "HLA-E", "PSME1", "PSMA6", "UBE3C", "UBE2L6", "PSMB6", "ERAP2", "UBE2J1", "RNF220", "CALR", "PSMD14", "PSMA3", "HLA-A", "UBE2Q…
315	CELL CYCLE%GO%GO:0007049	6.84654e-10	7.17691e-09	0.801216	0.288889	2.0539	361	c("BLM", "EIF4EBP1", "BCAT1", "MYC", "CDKN1A", "PCNT", "THBS1", "RPS27", "E2F5", "TUBG1", "CDK2", "PSME2", "IRF1", "BCL2L1", "KPNA2", "PSMD8", "TUBB", "TDRD9", "CDK6", "CLTC", "PPP1CC", "RAD9B", "PSMB8", "AURKA", "EPS8", "RBM38", "NKX3-1", "SOX11", "MAP2K1", "JTB", "CDC7", "POLA2", "PTEN", "RHOB", "CLIP1", "AHCTF1", "RANGAP1", "CAB39L", "SPC24", "MSH6", "NEK6", "PSME4", "E2F4", "KIF20A", "PA2G4",…
316	CELL SURFACE%GO%GO:0009986	7.24229e-10	7.56773e-09	0.801216	0.360643	2.38423	169	c("MPP3", "GGT5", "TGFA", "CCR1", "CSF1R", "TLR4", "PVR", "PLAU", "ACVRL1", "TGFBR3", "TLR2", "CD59", "AQP4", "ABCG1", "ADA", "P4HB", "THBS1", "TGFBR2", "NOD2", "CLIC4", "PDIA4", "HCST", "RAMP1", "HM13", "CD44", "ITGA2", "RTN4RL1", "CD276", "CD4", "AXL", "NGFR", "CSPG4", "SLC11A2", "HYAL2", "ITGA3", "CD33", "CD55", "LILRB2", "GRIN2A", "LPAR1", "CD63", "CD74", "ENPEP", "RARA", "FZD5", "PLAUR", "TE…
317	PATTERN RECOGNITION RECEPTOR SIGNALING PATHWAY%GO%GO:0002221	7.97911e-10	8.31136e-09	0.801216	0.490378	2.81092	69	c("TLR4", "TLR2", "BTK", "MARCO", "IRAK1", "NOD2", "LY96", "UNC93B1", "RPS6KA2", "IRAK3", "CLEC7A", "PIK3AP1", "MAP2K1", "RIPK2", "NFKBIA", "NFKBIB", "TRIM5", "ITCH", "CD14", "RPS6KA1", "RIPK1", "MAPKAPK3", "IRAK4", "MYD88", "MAP2K4", "NFKB1", "ELK1", "DUSP7", "TLR5", "TICAM2", "TLR6", "TNIP2", "CHUK", "MAP2K3", "JUN", "PELI1", "RELA", "FOS", "MAP2K2", "MAPK7", "UBA52", "IRAK2", "MAPK9", "NFKB2",…
318	EUKARYOTIC TRANSLATION TERMINATION%REACTOME%REACT_1986.3	8.2672e-10	8.55745e-09	0.801216	0.47117	2.75204	75	c("RPS27", "RPLP0", "RPS19", "RPL34", "RPL27A", "RPS5", "RPL29", "RPL18", "RPS18", "RPL24", "RPL13", "ETF1", "RPS17", "RPS3", "RPL35", "RPS15A", "RPS2", "RPS28", "RPSA", "RPL41", "RPLP2", "RPL18A", "RPS10", "RPL12", "RPS9", "RPL36A", "RPS6", "RPL21", "RPL28", "RPL26", "RPS12", "RPL37A", "RPL38", "RPL10A", "RPS15", "RPL17", "RPL36", "RPL13A", "RPL4", "RPS16", "RPL27", "RPL11", "RPL39", "RPS7", "RP…
319	TRANSLATIONAL TERMINATION%GO%GO:0006415	8.2672e-10	8.55745e-09	0.801216	0.47117	2.75204	75	c("RPS27", "RPLP0", "RPS19", "RPL34", "RPL27A", "RPS5", "RPL29", "RPL18", "RPS18", "RPL24", "RPL13", "ETF1", "RPS17", "RPS3", "RPL35", "RPS15A", "RPS2", "RPS28", "RPSA", "RPL41", "RPLP2", "RPL18A", "RPS10", "RPL12", "RPS9", "RPL36A", "RPS6", "RPL21", "RPL28", "RPL26", "RPS12", "RPL37A", "RPL38", "RPL10A", "RPS15", "RPL17", "RPL36", "RPL13A", "RPL4", "RPS16", "RPL27", "RPL11", "RPL39", "RPS7", "RP…
320	NUCLEOBASE-CONTAINING SMALL MOLECULE METABOLIC PROCESS%GO%GO:0055086	8.35195e-10	8.61628e-09	0.801216	0.332464	2.26571	217	c("MYH6", "NAMPT", "GFPT2", "BLM", "NUDT4", "GNMT", "PDE4D", "UAP1", "APOBEC2", "RHOD", "SHMT1", "ADA", "G6PD", "TKT", "GNL3", "ALDOA", "DDX3X", "PAPSS2", "EIF5", "NME1", "IDH1", "TK1", "GNPNAT1", "RAB8B", "RAP1GAP", "SLC25A13", "UGP2", "PGD", "TXNRD1", "ACLY", "PMM2", "EFTUD2", "DPYD", "PAICS", "NME1-NME2", "PGLS", "GPX1", "PDE2A", "ABCD3", "RHOB", "BAD", "ATL3", "GNL2", "NCF1", "MSH6", "PPAT", …
321	AMINO ACID AND DERIVATIVE METABOLISM%REACTOME%REACT_13.4	8.37705e-10	8.61628e-09	0.801216	0.421598	2.5819	100	c("ARG2", "AMD1", "NQO1", "CBS", "AASS", "BCAT1", "GLUL", "SHMT1", "ASS1", "TST", "SAT1", "PSME2", "ASNS", "PSMD8", "CKB", "CNDP2", "GCLM", "AHCY", "PSMB8", "PSAT1", "GPT", "CKM", "TPO", "HSD17B10", "PNMT", "PSME4", "OGDH", "PHGDH", "SLC25A15", "PSMA4", "MAT2A", "PSME1", "PSMA6", "KYNU", "MTRR", "PSMB6", "PSMD14", "PSMA3", "BCAT2", "PSMD2", "PSMA5", "PSMD12", "FAH", "PAOX", "OAZ1", "PSMD13", "CGA…
322	ATP BINDING%GO%GO:0005524	8.40231e-10	8.61628e-09	0.801216	0.401469	2.52542	120	c("BLM", "HK3", "PIM1", "WNK3", "ACVRL1", "BTK", "ABCG1", "MAP3K6", "GALK1", "NME1", "WNK1", "RUNX3", "STK17B", "CDK6", "PAPOLA", "SPHK1", "P2RX5", "PMVK", "PDK4", "IRAK3", "ABCB6", "PNPLA8", "TAP1", "NME1-NME2", "ABCD3", "PYGL", "MSH6", "NEK6", "MYO1B", "UHMK1", "OXSR1", "HSP90AA1", "PDXK", "SRPK1", "DMPK", "STRADB", "ACVR1B", "CDC42BPA", "PHKG2", "NME2", "MTHFD1L", "STK3", "TAP2", "PRKAG1", "TW…
323	TOLL-LIKE RECEPTOR SIGNALING PATHWAY%GO%GO:0002224	9.4576e-10	9.66842e-09	0.788187	0.496653	2.76509	62	c("TLR4", "TLR2", "BTK", "IRAK1", "NOD2", "LY96", "UNC93B1", "RPS6KA2", "IRAK3", "PIK3AP1", "MAP2K1", "RIPK2", "NFKBIA", "NFKBIB", "CD14", "RPS6KA1", "RIPK1", "MAPKAPK3", "IRAK4", "MYD88", "MAP2K4", "NFKB1", "ELK1", "DUSP7", "TLR5", "TICAM2", "TLR6", "TNIP2", "CHUK", "MAP2K3", "JUN", "PELI1", "RELA", "FOS", "MAP2K2", "MAPK7", "UBA52", "IRAK2", "MAPK9", "NFKB2", "TICAM1", "TMEM189-UBE2V1", "PRKCE"…
324	POSITIVE REGULATION OF CELL DIFFERENTIATION%GO%GO:0045597	9.80325e-10	9.99085e-09	0.788187	0.367483	2.40074	156	c("BMP7", "APOB", "PLA2G2A", "NCKAP1L", "CCR1", "PPARG", "HCLS1", "ACVRL1", "BTK", "CD86", "HIF1A", "IL6R", "TGFBR2", "SMYD1", "MSR1", "NGF", "DAB2", "FBN2", "AGTR1", "TESC", "AXIN2", "ZNF703", "AXL", "ZBTB16", "HSPA1B", "NGFR", "LILRB2", "IFITM1", "FES", "RARA", "SOX11", "NKX2-5", "NME1-NME2", "FNDC5", "BAD", "BCL9L", "DISC1", "CSF1", "BTG1", "CLCF1", "RPS6KA1", "WNT5B", "NOTCH1", "ACVR1B", "NFK…
325	PROTEIN DIMERIZATION ACTIVITY%GO%GO:0046983	1.01018e-09	1.02635e-08	0.788187	0.310363	2.15057	263	c("APOB", "PDGFRA", "CBS", "SLC11A1", "SLC9A7", "STAT3", "CSF1R", "PLEK", "HMOX1", "CYBB", "TLR2", "SHMT1", "ABCG1", "HIF1A", "TCF21", "IL6R", "CYBA", "IRAK1", "G6PD", "TKT", "SLC4A3", "IMPA2", "CALCOCO2", "GLA", "AGTR1", "TESC", "PDSS1", "GCA", "HM13", "SDCBP", "IDH1", "PRKRA", "CD4", "MLX", "ZBTB16", "RAP1GAP", "IRAK3", "CORO1A", "CADM3", "DGKD", "RPS19", "ADD1", "SH3GLB1", "DPYD", "RARA", "NKX…
326	SMALL MOLECULE BIOSYNTHETIC PROCESS%GO%GO:0044283	1.04513e-09	1.0586e-08	0.788187	0.377223	2.42154	137	c("PTDSS1", "GGT5", "CHPT1", "CDS1", "EBP", "PLSCR1", "ALOX5", "GPT2", "EDN1", "GLUL", "SHMT1", "SLC44A3", "G6PD", "ALOX5AP", "PDSS1", "PTGIS", "ASNS", "CSPG4", "CNDP2", "SGMS2", "GCLM", "PMVK", "HMGCS2", "UGP2", "EIF5A", "ELOVL5", "AKR1C3", "PSAT1", "CD74", "GPT", "PNPLA8", "NSDHL", "UST", "DSE", "PNMT", "LPIN2", "NDUFAB1", "PTGS1", "PHGDH", "DCN", "GGCT", "KYNU", "PTGDS", "UBIAD1", "PEMT", "EDN…
327	PROTEIN COMPLEX BIOGENESIS%GO%GO:0070271	1.08972e-09	1.10039e-08	0.788187	0.327543	2.24357	227	c("MGST1", "BLM", "MID1IP1", "WAS", "NCKAP1L", "GNMT", "FERMT3", "AASS", "REPS2", "HMOX1", "SHMT1", "SKAP2", "CYBA", "SCARA5", "IRAK1", "GPX3", "NOD2", "ALDOA", "ALOX5AP", "PREX1", "CCT2", "TK1", "TMEM70", "PICALM", "ACACB", "AIF1", "FERMT2", "SOD2", "DGKD", "RPS19", "SH3GLB1", "AKR1C3", "CD74", "BBS12", "MALT1", "CAPZA1", "TPPP", "TEK", "FBP1", "AHCTF1", "SLC9A1", "ATL3", "EHD1", "STOM", "TRIM5"…
328	Ribosome%KEGG%hsa03010	1.10183e-09	1.10922e-08	0.788187	0.460679	2.70052	78	c("RPS27", "RPLP0", "RPS19", "RPL34", "RPL27A", "RPS5", "RPL29", "RPL18", "RPS18", "RPL24", "RPL13", "RPS17", "RPS3", "RPL35", "RPS15A", "RPS2", "RPS28", "RPSA", "RPL41", "RPLP2", "RPL18A", "RPS10", "RPL12", "RPS9", "RPL36A", "RPS6", "RPL21", "RPL28", "RPL26", "RPS12", "RPL36AL", "RPL37A", "RPL38", "RPL10A", "RPS15", "RPL17", "RPL36", "RPL13A", "RPL4", "RPS16", "RPL27", "RPL22L1", "RPL11", "RPL39…
329	ANTIGEN PROCESSING AND PRESENTATION OF EXOGENOUS PEPTIDE ANTIGEN VIA MHC CLASS I, TAP-DEPENDENT%GO%GO:0002479	1.11993e-09	1.12402e-08	0.788187	0.505449	2.76045	56	c("CYBB", "CYBA", "SEC61A1", "PSME2", "B2M", "PSMD8", "PSMB8", "TAP1", "NCF4", "NCF1", "PSME4", "SEC61B", "PSMA4", "HLA-E", "PSME1", "PSMA6", "PSMB6", "CALR", "PSMD14", "PSMA3", "HLA-A", "PSMD2", "TAP2", "PSMA5", "PSMD12", "NCF2", "HLA-B", "FCGR1A", "PSMD13", "PSME3", "FCGR1B", "PSMB3", "SEC61G", "PSMB5", "UBA52", "PSMC3", "PSMB9", "PSMB1", "PSMA7", "PSMD9", "PSMC4", "PSMD3", "PSMC5", "TAPBP", "H…
330	VIRAL MRNA TRANSLATION%REACTOME%REACT_9491.1	1.13171e-09	1.1324e-08	0.788187	0.463066	2.71047	76	c("RPS27", "RPLP0", "RPS19", "RPL34", "RPL27A", "RPS5", "RPL29", "RPL18", "RPS18", "RPL24", "RPL13", "DNAJC3", "RPS17", "RPS3", "RPL35", "RPS15A", "RPS2", "RPS28", "RPSA", "RPL41", "RPLP2", "RPL18A", "RPS10", "RPL12", "RPS9", "RPL36A", "RPS6", "RPL21", "RPL28", "RPL26", "RPS12", "RPL37A", "RPL38", "RPL10A", "RPS15", "RPL17", "RPL36", "RPL13A", "RPL4", "RPS16", "RPL27", "RPL11", "RPL39", "RPS7", "…
331	CELLULAR AMINO ACID METABOLIC PROCESS%GO%GO:0006520	1.13972e-09	1.13697e-08	0.788187	0.373	2.43108	152	c("LPCAT3", "PLA2G2A", "PTDSS1", "GGT5", "GLRX2", "GNMT", "CBS", "AASS", "BCAT1", "PLSCR1", "GPT2", "GLUL", "SHMT1", "P4HB", "SLC7A8", "TST", "G6PD", "SLC6A6", "ATF4", "ALOX5AP", "GCAT", "ASNS", "PPA2", "LPCAT4", "CKB", "FASN", "CNDP2", "GCLM", "EEF1E1", "AHCY", "ASRGL1", "EIF5A", "EGLN1", "PSAT1", "GPT", "CKM", "TPO", "GPX1", "VNN2", "PPA1", "MTHFR", "HSD17B10", "ART4", "GSTP1", "MTHFD2", "OGDH"…
332	REGULATION OF CELLULAR COMPONENT MOVEMENT%GO%GO:0051270	1.16926e-09	1.16292e-08	0.788187	0.337176	2.27147	197	c("CCL2", "CCL11", "FGF7", "PDGFRA", "NCKAP1L", "PDPN", "CCR1", "HAS2", "CSF1R", "HMOX1", "PLAU", "ACVRL1", "TGFBR3", "EDN1", "HIF1A", "IL6R", "CCL21", "THBS1", "SPATA13", "PTPRU", "CLIC4", "SERPINE1", "ZNF703", "FGR", "RNF41", "CDK6", "SNAI2", "SPHK1", "TIMP1", "NF2", "WNT5A", "AIF1", "ANXA3", "HYAL2", "ANGPT2", "RPS19", "IFITM1", "FES", "MYBPC3", "CXCL16", "CD74", "LMNA", "PYCARD", "TEK", "PTEN…
333	TRANSMEMBRANE TRANSPORTER ACTIVITY%GO%GO:0022857	1.18517e-09	1.17286e-08	0.788187	0.32487	2.2309	233	c("AZGP1", "ATP2A2", "SLC2A1", "SLC1A5", "KCNIP2", "KCNK1", "ATP1A1", "SLC5A1", "PLP2", "PDPN", "SLC11A1", "SLC9A7", "SLC38A1", "EBP", "SLC1A3", "HCN4", "AQP4", "ABCG1", "AQP9", "KCNJ8", "SLC4A7", "SLC7A8", "SLC4A3", "SLC39A14", "CLIC4", "ABCC3", "KCNH2", "MAGT1", "KCNK3", "SLCO2B1", "SLC11A2", "HVCN1", "P2RX5", "SLC25A13", "ABCB6", "MAL", "GRIK2", "TAP1", "SLC1A1", "SLC36A2", "GPR89B", "GRIN3A",…
334	NEURON DEVELOPMENT%GO%GO:0048666	1.18636e-09	1.17286e-08	0.788187	0.33882	2.2849	202	c("BMP7", "KCNIP2", "TYROBP", "CHL1", "ITGA5", "EPB41L3", "RORB", "SDCBP", "ITGA2", "RTN4RL1", "ABLIM3", "WNK1", "RUNX3", "MTCH1", "RPS6KA2", "CLTC", "WNT5A", "GRB2", "ACTG1", "PLXNB1", "FES", "COL4A4", "NTN1", "CAP1", "FZD5", "MAP2K1", "STIP1", "TRIO", "COL5A1", "PTEN", "RHOB", "ITGB1", "COL6A3", "RAB8A", "MYL6", "KCNQ3", "MET", "BTG2", "UHMK1", "BAIAP2", "ITGB3", "HSP90AA1", "RPS6KA1", "PARD3",…
335	MEMBRANE ORGANIZATION%GO%GO:0061024	1.34694e-09	1.32764e-08	0.788187	0.368409	2.40968	158	c("KCNIP2", "NKD2", "PLSCR1", "THBS1", "EPB41L3", "VAMP8", "MYO5A", "TESC", "RAMP1", "GCA", "ATP11C", "BCL2L1", "MTCH1", "PICALM", "CLTC", "AIF1", "FERMT2", "HYAL2", "BID", "MUSK", "MAL", "COL5A1", "PTEN", "FTL", "BAD", "RAB8A", "SEC24D", "TMED9", "CAV1", "ATG7", "TXNDC5", "RAB34", "AP1B1", "CAV2", "TMED2", "PLSCR3", "HSP90AA1", "BAK1", "RAMP3", "AP2S1", "DMPK", "SERP1", "PACSIN2", "STOML2", "A4G…
336	CELLULAR COMPONENT MORPHOGENESIS%GO%GO:0032989	1.36016e-09	1.33668e-08	0.788187	0.309084	2.14321	265	c("MYH6", "BMP7", "PDGFRA", "HEY2", "PDPN", "TYROBP", "CHL1", "TGFBR3", "PCNT", "HIF1A", "ITGA5", "EPB41L3", "SDCBP", "ITGA2", "PID1", "RTN4RL1", "ABLIM3", "SNAI2", "TYRO3", "RPS6KA2", "CLTC", "HNRNPAB", "WNT5A", "GRB2", "ACTG1", "PLXNB1", "FERMT2", "FES", "COL4A4", "NTN1", "CAP1", "FZD5", "RPGR", "MAP2K1", "STIP1", "S100A4", "TEK", "TRIO", "PARVA", "COL5A1", "PTEN", "RHOB", "ITGB1", "COL6A3", "R…
337	VACUOLE%GO%GO:0005773	1.38021e-09	1.35236e-08	0.788187	0.386171	2.4756	134	c("CTSC", "IFI30", "HOOK1", "CTSB", "SLC11A1", "SRGN", "LAPTM5", "ADA", "HLA-DMA", "STXBP2", "HLA-DRA", "HLA-DMB", "GLA", "CTSS", "LITAF", "UNC93B1", "CSPG4", "TLR8", "SLC11A2", "HYAL2", "PSAP", "ABCB6", "CD74", "HLA-DPA1", "LGMN", "NPC2", "NCF4", "AKTIP", "SLC15A3", "NCF1", "TXNDC5", "TMBIM1", "NPC1", "AP1B1", "HLA-DRB4", "MAP1LC3A", "CTSH", "DCN", "CD164", "SCARB2", "HLA-DPB1", "RAMP3", "HCK", …
338	REGULATION OF CELL MOTILITY%GO%GO:2000145	1.40789e-09	1.3754e-08	0.788187	0.354146	2.35909	179	c("CCL2", "CCL11", "FGF7", "PDGFRA", "NCKAP1L", "CCR1", "HAS2", "CSF1R", "HMOX1", "PLAU", "ACVRL1", "EDN1", "HIF1A", "IL6R", "CCL21", "THBS1", "SPATA13", "PTPRU", "CLIC4", "SERPINE1", "ZNF703", "FGR", "RNF41", "CDK6", "SNAI2", "SPHK1", "TIMP1", "NF2", "WNT5A", "AIF1", "ANXA3", "HYAL2", "ANGPT2", "IFITM1", "FES", "CXCL16", "CD74", "LMNA", "PYCARD", "TEK", "PTEN", "RARRES2", "CSF1", "ITGB3", "CTSH"…
339	CELL PROLIFERATION%GO%GO:0008283	1.48891e-09	1.45026e-08	0.788187	0.344635	2.32351	201	c("FGF7", "OSMR", "SYK", "OSR1", "TGFA", "SLC11A1", "PIM1", "IL15RA", "BCAT1", "ISG20", "CSF1R", "HMOX1", "DDIT4", "ACVRL1", "TGFBR3", "GLUL", "RPS27", "SLC29A2", "DAB2", "CXCL1", "LY86", "TGFBI", "CD276", "IL10", "UHRF1", "NF2", "WNT5A", "FES", "EPS8", "NKX3-1", "CD74", "ENPEP", "SOX11", "IL2RA", "IFI16", "TEK", "HDGF", "PTEN", "ELF4", "BAD", "ALKBH3", "CDV3", "FURIN", "EMP1", "GSTP1", "MET", "I…
340	VIRAL GENOME EXPRESSION%GO%GO:0019080	1.56829e-09	1.51862e-08	0.788187	0.467997	2.72548	74	c("RPS27", "RPLP0", "RPS19", "RPL34", "RPL27A", "RPS5", "RPL29", "RPL18", "RPS18", "RPL24", "RPL13", "RPS17", "RPS3", "RPL35", "RPS15A", "RPS2", "RPS28", "RPSA", "RPL41", "RPLP2", "RPL18A", "RPS10", "RPL12", "RPS9", "RPL36A", "RPS6", "RPL21", "RPL28", "RPL26", "RPS12", "RPL37A", "RPL38", "RPL10A", "RPS15", "RPL17", "RPL36", "RPL13A", "RPL4", "RPS16", "RPL27", "RPL11", "RPL39", "RPS7", "RPL6", "UB…
341	VIRAL TRANSCRIPTION%GO%GO:0019083	1.56829e-09	1.51862e-08	0.788187	0.467997	2.72548	74	c("RPS27", "RPLP0", "RPS19", "RPL34", "RPL27A", "RPS5", "RPL29", "RPL18", "RPS18", "RPL24", "RPL13", "RPS17", "RPS3", "RPL35", "RPS15A", "RPS2", "RPS28", "RPSA", "RPL41", "RPLP2", "RPL18A", "RPS10", "RPL12", "RPS9", "RPL36A", "RPS6", "RPL21", "RPL28", "RPL26", "RPS12", "RPL37A", "RPL38", "RPL10A", "RPS15", "RPL17", "RPL36", "RPL13A", "RPL4", "RPS16", "RPL27", "RPL11", "RPL39", "RPS7", "RPL6", "UB…
342	RESPONSE TO BACTERIUM%GO%GO:0009617	1.65659e-09	1.59944e-08	0.788187	0.437146	2.60161	85	c("CCL2", "PLA2G2A", "S100A9", "SYK", "SLC11A1", "S100A8", "TLR4", "TLR2", "IL6R", "IRAK1", "PRKCD", "SELE", "STAB1", "NOD2", "SERPINE1", "LY96", "FGR", "AXL", "IL10", "WNT5A", "IRAK3", "ANXA3", "LILRB2", "CXCL2", "FZD5", "PYCARD", "S100A12", "TNFRSF1B", "TLR1", "GSTP1", "CD14", "BAIAP2", "MAPKAPK3", "LYN", "NR1H3", "HCK", "IRF5", "NLRP3", "HLA-A", "TLR6", "TNIP2", "LILRB1", "HLA-B", "CFP", "MTDH…
343	EUKARYOTIC TRANSLATION ELONGATION%REACTOME%REACT_1477.2	1.8266e-09	1.75844e-08	0.788187	0.45726	2.68047	78	c("RPS27", "RPLP0", "RPS19", "RPL34", "RPL27A", "RPS5", "RPL29", "RPL18", "RPS18", "RPL24", "RPL13", "RPS17", "RPS3", "RPL35", "RPS15A", "RPS2", "RPS28", "RPSA", "RPL41", "RPLP2", "RPL18A", "RPS10", "RPL12", "RPS9", "RPL36A", "EEF1D", "RPS6", "RPL21", "RPL28", "RPL26", "RPS12", "RPL37A", "RPL38", "RPL10A", "RPS15", "RPL17", "RPL36", "RPL13A", "RPL4", "RPS16", "RPL27", "RPL11", "RPL39", "RPS7", "E…
344	ORGANONITROGEN COMPOUND CATABOLIC PROCESS%GO%GO:1901565	1.84034e-09	1.76651e-08	0.788187	0.333982	2.2572	205	c("MYH6", "BLM", "CBS", "AASS", "LYVE1", "BCAT1", "PDE4D", "APOBEC2", "RHOD", "HMOX1", "GLUL", "SHMT1", "ADA", "TST", "GNL3", "DDX3X", "GLA", "EIF5", "CD44", "RAB8B", "CSPG4", "SPHK1", "MPST", "RAP1GAP", "ASRGL1", "HYAL2", "ACLY", "EFTUD2", "DPYD", "PNPLA8", "GPX1", "PDE2A", "ABCD3", "RHOB", "SLC9A1", "ATL3", "GNL2", "NCF1", "HSD17B10", "MSH6", "OGDH", "HSP90AA1", "RHOF", "CTSH", "DCN", "RAB5A", …
345	NEGATIVE REGULATION OF SIGNALING%GO%GO:0023057	2.03034e-09	1.94324e-08	0.774939	0.310884	2.15302	259	c("BMP7", "PPARG", "MYC", "TLR4", "PLEK", "DDIT4", "NKD2", "ADA", "TCF21", "THBS1", "TGFBR2", "PRKCD", "DUSP2", "SOCS1", "DAB2", "DDX3X", "FBN2", "DUSP1", "AXIN2", "CD44", "PID1", "BCL2L1", "MVP", "IL10", "SNAI2", "TYRO3", "CLTC", "PPP1CC", "NF2", "WNT5A", "SH3KBP1", "GRB2", "IRAK3", "EPN1", "HYAL2", "HIPK2", "NKX3-1", "ERRFI1", "CD74", "NKX2-5", "PYCARD", "LRP4", "NR1H2", "FBP1", "PPP1CA", "PTEN…
346	NONSENSE MEDIATED DECAY INDEPENDENT OF THE EXON JUNCTION COMPLEX%REACTOME%REACT_75768.1	2.1197e-09	2.0229e-08	0.774939	0.452968	2.65707	80	c("RPS27", "EIF4G1", "RPLP0", "RPS19", "RPL34", "RPL27A", "RPS5", "RPL29", "RPL18", "RPS18", "RPL24", "RPL13", "ETF1", "RPS17", "RPS3", "RPL35", "RPS15A", "RPS2", "RPS28", "RPSA", "RPL41", "RPLP2", "RPL18A", "RPS10", "RPL12", "RPS9", "RPL36A", "RPS6", "RPL21", "RPL28", "RPL26", "RPS12", "RPL37A", "RPL38", "RPL10A", "RPS15", "RPL17", "RPL36", "RPL13A", "RPL4", "RPS16", "RPL27", "RPL11", "RPL39", "…
347	NEGATIVE REGULATION OF CELL COMMUNICATION%GO%GO:0010648	2.12626e-09	2.02332e-08	0.774939	0.311712	2.1595	260	c("BMP7", "PPARG", "MYC", "TLR4", "PLEK", "DDIT4", "NKD2", "ADA", "TCF21", "THBS1", "TGFBR2", "PRKCD", "DUSP2", "SOCS1", "DAB2", "DDX3X", "FBN2", "DUSP1", "AXIN2", "CD44", "PID1", "BCL2L1", "IL10", "SNAI2", "TYRO3", "CLTC", "PPP1CC", "NF2", "WNT5A", "SH3KBP1", "GRB2", "IRAK3", "EPN1", "HYAL2", "HIPK2", "NKX3-1", "ERRFI1", "CD74", "NKX2-5", "PYCARD", "LRP4", "NR1H2", "FBP1", "PPP1CA", "PTEN", "RGS…
348	PROTEIN PHOSPHORYLATION%GO%GO:0006468	2.28613e-09	2.16919e-08	0.774939	0.315596	2.18468	257	c("CCL2", "CCL11", "FPR1", "SYK", "PDGFRA", "TGFA", "PIM1", "MAP3K8", "WNK3", "CSF1R", "TLR4", "GRK5", "EFEMP1", "ACVRL1", "TGFBR3", "TLR2", "BTK", "MAP3K6", "IRAK1", "THBS1", "TGFBR2", "PRKCD", "NOD2", "NGF", "CDK2", "DCLK1", "WNK1", "FGR", "C5AR1", "RUNX3", "MERTK", "STK17B", "CDK6", "TYRO3", "PDK4", "WNT5A", "IRAK3", "FES", "MUSK", "AURKA", "HIPK2", "RARA", "JAK1", "MAP2K1", "TEK", "PRDX4", "R…
349	SINGLE-ORGANISM CARBOHYDRATE METABOLIC PROCESS%GO%GO:0044723	2.3181e-09	2.19323e-08	0.774939	0.341755	2.2882	187	c("HK2", "GFPT2", "SLC2A1", "SLC2A3", "HK3", "LDHA", "ENO1", "ALG3", "NANS", "UAP1", "MPDU1", "G6PD", "TKT", "GALK1", "ATF4", "RPN1", "ALDOA", "MCFD2", "GLA", "MAGT1", "ST3GAL1", "EDEM2", "GNPNAT1", "B4GALT6", "SLC25A13", "UGP2", "MGAT4A", "PGD", "PMM2", "RPN2", "GPT", "ALG8", "PFKFB3", "MAN1A1", "PGLS", "FBP1", "PYGL", "ALG5", "SEC24D", "ART4", "AKR1A1", "NPC1", "B4GALT3", "DDOST", "PGAM2", "MAN…
350	MITOTIC M-M G1 PHASES%REACTOME%REACT_21300.3	2.42128e-09	2.2843e-08	0.774939	0.390106	2.47266	124	c("RPS27", "PPP2R5A", "CDK2", "PSME2", "PSMD8", "PPP1CC", "PSMB8", "CDC7", "POLA2", "PPP2CB", "CLIP1", "AHCTF1", "RANGAP1", "SPC24", "NEK6", "PSME4", "KIF20A", "PSMA4", "PSME1", "PSMA6", "LMNB1", "CSNK2A1", "PSMB6", "KIF2A", "CENPE", "PSMD14", "PSMA3", "NDEL1", "ANAPC7", "BLZF1", "PSMD2", "E2F3", "MCM8", "B9D2", "PSMA5", "PSMD12", "FBXO5", "NUDC", "GMNN", "PSMD13", "NEK9", "GORASP2", "ZW10", "ANA…
351	REGULATION OF CELLULAR CATABOLIC PROCESS%GO%GO:0031329	2.47797e-09	2.33113e-08	0.774939	0.341133	2.29024	192	c("MYH6", "CCL11", "FGD2", "NCKAP1L", "ABHD5", "NKD2", "PLSCR1", "MYL4", "HIF1A", "CCL21", "TIMP3", "PRKCD", "DAB2", "PREX1", "AXIN2", "TBC1D2", "RGS19", "BCL2L1", "IL10", "RGS10", "UHRF1", "MYL3", "RAP1GAP", "TIMP1", "RGS1", "PLXNB1", "ZFP36", "CST3", "MYBPC3", "ERRFI1", "CDC42EP2", "IFI16", "GPX1", "FBP1", "PTEN", "RGS2", "RANGAP1", "BAD", "ADAP2", "TNFRSF1B", "IQGAP1", "FURIN", "USP10", "ATG7"…
352	PEPTIDE CHAIN ELONGATION%REACTOME%REACT_1404.2	2.50045e-09	2.34559e-08	0.774939	0.460713	2.69096	75	c("RPS27", "RPLP0", "RPS19", "RPL34", "RPL27A", "RPS5", "RPL29", "RPL18", "RPS18", "RPL24", "RPL13", "RPS17", "RPS3", "RPL35", "RPS15A", "RPS2", "RPS28", "RPSA", "RPL41", "RPLP2", "RPL18A", "RPS10", "RPL12", "RPS9", "RPL36A", "RPS6", "RPL21", "RPL28", "RPL26", "RPS12", "RPL37A", "RPL38", "RPL10A", "RPS15", "RPL17", "RPL36", "RPL13A", "RPL4", "RPS16", "RPL27", "RPL11", "RPL39", "RPS7", "RPL6", "UB…
353	NUCLEOSIDE PHOSPHATE METABOLIC PROCESS%GO%GO:0006753	2.54192e-09	2.37773e-08	0.774939	0.33473	2.25192	195	c("MYH6", "NAMPT", "GFPT2", "BLM", "NUDT4", "PDE4D", "UAP1", "RHOD", "ADA", "G6PD", "TKT", "GNL3", "ALDOA", "DDX3X", "PAPSS2", "EIF5", "IDH1", "TK1", "GNPNAT1", "RAB8B", "RAP1GAP", "SLC25A13", "UGP2", "PGD", "ACLY", "PMM2", "EFTUD2", "PAICS", "NME1-NME2", "PGLS", "GPX1", "PDE2A", "ABCD3", "RHOB", "BAD", "ATL3", "GNL2", "NCF1", "MSH6", "PPAT", "IMPDH1", "HSP90AA1", "RHOF", "NUDT5", "GART", "NADK",…
354	RIBOSOME%GO%GO:0005840	2.65108e-09	2.47284e-08	0.774939	0.394559	2.47845	118	c("RPS27", "DDX3X", "RRBP1", "RPLP0", "RPS19", "RPL34", "MRPL3", "MRPL36", "RPL27A", "RPS5", "RPL29", "MRPS12", "RPL18", "RPS18", "APEX1", "RPL24", "RPL13", "RPS17", "RPS3", "RBM3", "RPL35", "MRPS24", "RPS15A", "HSPA14", "MRPL41", "RPS2", "MRPS16", "RPS28", "RPSA", "RPL41", "RPLP2", "RPL18A", "RPS10", "RPL12", "RPS9", "RPL36A", "RPS6", "SERP1", "RPL21", "RPL28", "MRPL51", "RPL26", "RPS12", "MRPL2…
355	REGULATION OF CELLULAR LOCALIZATION%GO%GO:0060341	2.66981e-09	2.4833e-08	0.774939	0.329472	2.2535	223	c("BMP7", "SLC2A1", "SYK", "NUDT4", "WNK3", "SRGN", "CSF1R", "HCLS1", "TLR4", "LCP1", "NKD2", "RHBDF2", "EDN1", "TLR2", "PRKAR2A", "STXBP2", "NOD2", "GAS1", "DAB2", "PPP2R5A", "AXIN2", "PID1", "FGR", "BCL2L1", "BCL3", "IL10", "SNAI2", "SPCS3", "SPHK1", "P2RX5", "WNT5A", "HYAL2", "CABP1", "FES", "NKX3-1", "MYBPC3", "SOX11", "SYTL4", "PYCARD", "MAP2K1", "PDE2A", "RANGAP1", "BAD", "GPM6B", "SEC11C",…
356	NEGATIVE REGULATION OF MACROMOLECULE BIOSYNTHETIC PROCESS%GO%GO:0010558	2.70178e-09	2.50598e-08	0.774939	0.288988	2.04152	334	c("BMP7", "BLM", "TSPYL2", "CD38", "OSR1", "HEY2", "ENO1", "IRF8", "BCL6", "PPARG", "LRP8", "MYC", "STAT3", "ACVRL1", "EDN1", "TCF21", "IL6R", "TGIF1", "NRIP1", "DAB2", "DDX3X", "SPI1", "ZNF703", "PID1", "IRF1", "RUNX3", "BCL3", "IL10", "PER1", "SNAI2", "MLX", "ZBTB16", "UHRF1", "NF2", "WNT5A", "ZFP36", "PAWR", "NKX3-1", "USP2", "RARA", "ZNF593", "SOX11", "ELK4", "UBE2D3", "NKX2-5", "IFI16", "NR1…
357	NEGATIVE REGULATION OF CELLULAR BIOSYNTHETIC PROCESS%GO%GO:0031327	2.76573e-09	2.55811e-08	0.774939	0.285283	2.02484	350	c("BMP7", "BLM", "TSPYL2", "CD38", "OSR1", "HEY2", "ENO1", "IRF8", "BCL6", "PPARG", "LRP8", "MYC", "STAT3", "PLEK", "ACVRL1", "EDN1", "TCF21", "TGIF1", "GABBR2", "NRIP1", "DAB2", "DDX3X", "GLA", "SPI1", "PTGIS", "ZNF703", "PID1", "IRF1", "RUNX3", "BCL3", "IL10", "PER1", "SNAI2", "MLX", "ZBTB16", "UHRF1", "NF2", "WNT5A", "ZFP36", "PAWR", "NKX3-1", "AKR1C3", "USP2", "RARA", "ZNF593", "SOX11", "ELK4…
358	TGF_BETA_RECEPTOR%NETPATH%TGF_BETA_RECEPTOR	2.8496e-09	2.62832e-08	0.774939	0.396058	2.47108	115	c("ATF3", "EIF4EBP1", "MYC", "CDKN1A", "ACVRL1", "TGFBR3", "TGIF1", "PRKAR2A", "TGFBR2", "E2F5", "DAB2", "AXIN2", "CD44", "NME1", "CDK2", "RUNX3", "CDK6", "PPP1CC", "GRB2", "UBE2D3", "MAP2K1", "ITGB1", "NFKBIA", "CAV1", "E2F4", "DAXX", "ITCH", "ITGB3", "PARD3", "STRAP", "NFKB1", "SNX6", "ANAPC7", "EIF3I", "CHUK", "MAP2K3", "JUN", "SKI", "ING2", "FOS", "KPNB1", "SHC1", "FOXO3", "ENG", "NCOA1", "FO…
359	CYTOSKELETON%GO%GO:0005856	2.89362e-09	2.66149e-08	0.774939	0.267986	1.93201	463	c("MYH6", "TUBA3E", "TUBA3D", "S100A9", "SPOCK1", "MID1IP1", "TSPYL2", "FERMT3", "MYOT", "S100A8", "TUBA1C", "ABRA", "CDC42EP4", "LAD1", "LCP1", "PCNT", "MYL4", "NEDD9", "PALLD", "PRKAR2A", "G6PD", "SLC4A3", "SELE", "PARVG", "ALDOA", "CLIC4", "TUBG1", "ZYX", "CCT2", "RPP25", "AXIN2", "SDCBP", "CDK2", "FGR", "BCL2L1", "TUBA1B", "MVP", "TUBB", "SRPRB", "CLTC", "MYL3", "NF2", "AIF1", "CORO1C", "ACTG…
360	RESPONSE TO UNFOLDED PROTEIN%GO%GO:0006986	2.95214e-09	2.70777e-08	0.774939	0.459406	2.68332	75	c("CCL2", "ATF3", "TSPYL2", "HSPA6", "ATF4", "ASNS", "SRPRB", "HSPA1B", "HSPB7", "HSPB3", "XBP1", "SERPINH1", "DNAJB9", "ADD1", "DERL1", "LMNA", "HDGF", "ATF6", "DNAJC3", "HSP90AA1", "HSP90B1", "DNAJB1", "SSR1", "KLHDC3", "SERP1", "PTPN1", "CALR", "RHBDD1", "WFS1", "TOR1B", "SHC1", "FKBP14", "PDIA6", "ACADVL", "CXXC1", "VCP", "EIF2S1", "HSPE1", "HSPA8", "DERL2", "HERPUD1", "HYOU1", "EDEM1", "HSPA…
361	TRANSCRIPTION FACTOR BINDING TRANSCRIPTION FACTOR ACTIVITY%GO%GO:0000989	3.02152e-09	2.76372e-08	0.774939	0.339961	2.27619	187	c("LMCD1", "ATF3", "ENO1", "PPARG", "TGIF1", "SMARCD2", "NRIP1", "HES6", "HSF2", "NCOA7", "WWC1", "MSC", "HTATIP2", "BATF3", "PAWR", "HIPK2", "RARA", "ZNF593", "SOX11", "ELK4", "CITED4", "HDGF", "ARL2BP", "MED16", "APEX1", "ATF6", "NFKBIB", "LPIN2", "BCL9L", "PQBP1", "SMARCA4", "NFE2L3", "BTG1", "RXRA", "ATXN7L3", "RIPK3", "NR1H3", "NOTCH1", "NCOA3", "YY1", "CITED2", "NMI", "ELF3", "KCNIP3", "HSB…
362	NEGATIVE REGULATION OF CELL PROLIFERATION%GO%GO:0008285	3.21336e-09	2.93108e-08	0.774939	0.333384	2.24287	195	c("AZGP1", "BMP7", "PPARG", "MYC", "CDKN1A", "HMOX1", "ACVRL1", "TGFBR3", "THBS1", "TOB2", "PTPRU", "CXCL1", "TESC", "AXIN2", "NME1", "PRKRA", "IRF1", "FABP6", "RNF41", "RUNX3", "CDK6", "IL10", "SNAI2", "HSPA1B", "RPS6KA2", "NF2", "EEF1E1", "WNT5A", "AIF1", "PLXNB1", "SOD2", "CD33", "LILRB2", "IFITM1", "PAWR", "RBM38", "NKX3-1", "SOX11", "EMP3", "MAP2K1", "S100A11", "PTEN", "CAV1", "GSTP1", "BTG2…
363	REGULATION OF LYMPHOCYTE ACTIVATION%GO%GO:0051249	3.26162e-09	2.96691e-08	0.774939	0.422114	2.57375	98	c("CCL2", "NCKAP1L", "CD38", "MAP3K8", "CD209", "SAMSN1", "BTK", "CD86", "CCL21", "TGFBR2", "PIK3R3", "NOD2", "HLA-DRA", "EBI3", "IRF1", "CD276", "CD4", "AXL", "IL10", "GRB2", "AIF1", "LILRB2", "CD74", "HLA-DPA1", "RARA", "SOX11", "MALT1", "PYCARD", "YES1", "CAV1", "HLA-DRB4", "MNDA", "CD274", "CLCF1", "PAK2", "HLA-DPB1", "LYN", "IL6ST", "IRS2", "CLPTM1", "CSK", "IGFBP2", "AHR", "TNIP2", "TNFRSF1…
364	ANTIGEN PROCESSING-CROSS PRESENTATION%REACTOME%REACT_111119.1	3.47094e-09	3.14864e-08	0.774939	0.495411	2.72826	58	c("CYBB", "CYBA", "SEC61A1", "CTSS", "PSME2", "B2M", "PSMD8", "PSMB8", "TAP1", "NCF4", "NCF1", "PSME4", "SEC61B", "PSMA4", "HLA-E", "PSME1", "PSMA6", "PSMB6", "CALR", "PSMD14", "PSMA3", "HLA-A", "PSMD2", "TAP2", "PSMA5", "PSMD12", "NCF2", "HLA-B", "FCGR1A", "PSMD13", "PSME3", "FCGR1B", "PSMB3", "SEC61G", "PSMB5", "UBA52", "PSMC3", "PSMB9", "PSMB1", "PSMA7", "PSMD9", "PSMC4", "PSMD3", "PSMC5", "TA…
365	TRANSMEMBRANE SIGNALING RECEPTOR ACTIVITY%GO%GO:0004888	3.50238e-09	3.16845e-08	0.774939	0.3227	2.21549	230	c("S1PR3", "FPR1", "OSMR", "PDGFRA", "IL15RA", "LILRB5", "CCR1", "PPARG", "LRP8", "CSF1R", "IL1R1", "TLR4", "IL1RL1", "EBP", "IL17RA", "EFEMP1", "ACVRL1", "TGFBR3", "MARCO", "C3AR1", "AKR1C2", "IL6R", "TGFBR2", "OPN3", "SELE", "HLA-DRA", "GPR34", "PTPRU", "IGSF6", "AGTR1", "RAMP1", "PTPRG", "EBI3", "CD44", "IL1R2", "TNFRSF10A", "C5AR1", "CD4", "IL17RB", "TNFRSF1A", "NGFR", "TYRO3", "P2RX5", "PLXN…
366	TOLL-LIKE RECEPTOR 2 SIGNALING PATHWAY%GO%GO:0034134	3.56269e-09	3.209e-08	0.774939	0.517793	2.74397	49	c("TLR4", "TLR2", "BTK", "IRAK1", "NOD2", "LY96", "RPS6KA2", "PIK3AP1", "MAP2K1", "RIPK2", "NFKBIA", "NFKBIB", "RPS6KA1", "MAPKAPK3", "IRAK4", "MYD88", "MAP2K4", "NFKB1", "ELK1", "DUSP7", "TLR6", "TNIP2", "CHUK", "MAP2K3", "JUN", "PELI1", "RELA", "FOS", "MAP2K2", "MAPK7", "UBA52", "IRAK2", "MAPK9", "NFKB2", "TMEM189-UBE2V1", "MAPKAPK2", "MAPK14", "IKBKB", "CREB1", "IKBKG")
367	NEGATIVE REGULATION OF GENE EXPRESSION%GO%GO:0010629	3.56664e-09	3.209e-08	0.774939	0.302739	2.1108	292	c("BMP7", "CD38", "OSR1", "HEY2", "ENO1", "IRF8", "BCL6", "CCR1", "PPARG", "LRP8", "MYC", "STAT3", "EDN1", "TCF21", "TGIF1", "NRIP1", "DAB2", "SPI1", "ZNF703", "PRKRA", "IRF1", "RUNX3", "BCL3", "PER1", "SNAI2", "MLX", "ZBTB16", "UHRF1", "NDFIP2", "WNT5A", "ZFP36", "PAWR", "NKX3-1", "USP2", "RARA", "ZNF593", "SOX11", "ELK4", "UBE2D3", "NKX2-5", "IFI16", "NR1H2", "HDGF", "PDE2A", "EDNRB", "SBNO2", …
368	SINGLE-ORGANISM BIOSYNTHETIC PROCESS%GO%GO:0044711	3.70627e-09	3.32557e-08	0.774939	0.373175	2.39801	138	c("PTDSS1", "GGT5", "CHPT1", "CDS1", "EBP", "PLSCR1", "ALOX5", "GPT2", "EDN1", "GLUL", "SHMT1", "SLC44A3", "G6PD", "ALOX5AP", "PDSS1", "PTGIS", "ASNS", "CSPG4", "CNDP2", "SGMS2", "GCLM", "PMVK", "HMGCS2", "UGP2", "EIF5A", "ELOVL5", "AKR1C3", "PSAT1", "CD74", "GPT", "PNPLA8", "NSDHL", "UST", "DSE", "PNMT", "LPIN2", "NDUFAB1", "PTGS1", "PHGDH", "DCN", "GGCT", "KYNU", "PTGDS", "UBIAD1", "PEMT", "EDN…
369	Leishmaniasis%KEGG%hsa05140	3.88759e-09	3.47881e-08	0.761461	0.505755	2.73653	54	c("C3", "TLR4", "TLR2", "CYBA", "HLA-DMA", "IRAK1", "ITGAM", "HLA-DRA", "HLA-DMB", "IL10", "ITGB2", "FCGR2A", "IFNGR1", "HLA-DPA1", "JAK1", "NCF4", "ITGB1", "MAPK13", "NCF1", "NFKBIA", "NFKBIB", "HLA-DRB4", "HLA-DPB1", "IRAK4", "MYD88", "NFKB1", "ELK1", "CR1", "JUN", "RELA", "NCF2", "FOS", "FCGR1A", "PTGS2", "PTPN6", "HLA-DRB3", "IL1B", "MARCKSL1", "IFNGR2", "MAPK14", "HLA-DOA")
370	Toxoplasmosis%KEGG%hsa05145	3.93115e-09	3.50829e-08	0.761461	0.453015	2.65559	78	c("PLA2G2A", "BIRC3", "STAT3", "TLR4", "HSPA6", "ALOX5", "TLR2", "HLA-DMA", "IRAK1", "PIK3R3", "SOCS1", "HLA-DRA", "HLA-DMB", "GNAO1", "LY96", "BCL2L1", "TNFRSF1A", "IL10", "HSPA1B", "IFNGR1", "LAMC2", "HLA-DPA1", "JAK1", "ITGB1", "BAD", "IL10RA", "MAPK13", "NFKBIA", "NFKBIB", "PIK3R5", "PLA2G5", "HLA-DRB4", "HLA-DPB1", "IRAK4", "MYD88", "LAMB3", "NFKB1", "CHUK", "MAP2K3", "RELA", "BIRC2", "PLA2G…
371	Apoptosis%KEGG%hsa04210	3.95404e-09	3.5192e-08	0.761461	0.505386	2.73453	54	c("BIRC3", "IL1R1", "PPP3CC", "IRAK1", "PRKAR2A", "PIK3R3", "NGF", "TNFRSF10A", "BCL2L1", "TNFRSF1A", "IRAK3", "BID", "BAD", "NFKBIA", "PIK3R5", "ENDOG", "RIPK1", "IRAK4", "MYD88", "NFKB1", "CASP7", "FADD", "CHUK", "RELA", "BIRC2", "TNFRSF10D", "TRADD", "CAPN1", "IRAK2", "PRKX", "IL1B", "CFLAR", "DFFB", "BAX", "TNFRSF10B", "CAPN2", "IL3RA", "NTRK1", "IKBKB", "PPP3CA", "IKBKG", "PPP3R1", "IL1RAP",…
372	PROTEIN BINDING TRANSCRIPTION FACTOR ACTIVITY%GO%GO:0000988	4.14914e-09	3.68292e-08	0.761461	0.341117	2.29757	198	c("LMCD1", "ATF3", "HEY2", "ENO1", "PPARG", "HIF1A", "TGIF1", "SMARCD2", "NRIP1", "HES6", "PER1", "HSF2", "NCOA7", "WWC1", "MSC", "HTATIP2", "BATF3", "PAWR", "HIPK2", "NKX3-1", "RARA", "ZNF593", "SOX11", "ELK4", "CITED4", "HDGF", "ARL2BP", "MED16", "APEX1", "ATF6", "NFKBIB", "LPIN2", "BCL9L", "PQBP1", "SMARCA4", "NFE2L3", "BTG1", "RXRA", "ATXN7L3", "RIPK3", "NR1H3", "NOTCH1", "NCOA3", "YY1", "CIT…
373	PROTEIN COMPLEX ASSEMBLY%GO%GO:0006461	4.27352e-09	3.78316e-08	0.761461	0.324629	2.22475	225	c("MGST1", "BLM", "MID1IP1", "WAS", "NCKAP1L", "GNMT", "FERMT3", "AASS", "REPS2", "HMOX1", "SHMT1", "SKAP2", "CYBA", "SCARA5", "IRAK1", "GPX3", "NOD2", "ALDOA", "ALOX5AP", "PREX1", "CCT2", "TK1", "TMEM70", "PICALM", "ACACB", "AIF1", "FERMT2", "SOD2", "DGKD", "RPS19", "SH3GLB1", "AKR1C3", "CD74", "BBS12", "MALT1", "CAPZA1", "TPPP", "TEK", "FBP1", "AHCTF1", "SLC9A1", "ATL3", "EHD1", "STOM", "TRIM5"…
374	DEVELOPMENTAL BIOLOGY%REACTOME%REACT_111045.1	4.59484e-09	4.05672e-08	0.761461	0.335531	2.25856	196	c("CEBPD", "ANGPTL4", "TYROBP", "PPARG", "CHL1", "IL6R", "ITGA5", "SDCBP", "ITGA2", "ABLIM3", "RPS6KA2", "PLXNB1", "FES", "COL4A4", "NTN1", "CAP1", "JAK1", "MAP2K1", "STIP1", "TRIO", "RHOB", "MED16", "ITGB1", "COL6A3", "MYL6", "FURIN", "KCNQ3", "SCN9A", "MET", "ITGB3", "HSP90AA1", "RXRA", "RPS6KA1", "MED20", "PAK2", "CFL1", "CSNK2A1", "AP2S1", "CCND3", "RAC2", "NOTCH1", "ACVR1B", "NFKB1", "NCOA3"…
375	CELL MORPHOGENESIS INVOLVED IN DIFFERENTIATION%GO%GO:0000904	4.79241e-09	4.21988e-08	0.761461	0.336844	2.27098	201	c("BMP7", "HEY2", "TYROBP", "CHL1", "TGFBR3", "HIF1A", "ITGA5", "SDCBP", "ITGA2", "RTN4RL1", "ABLIM3", "SNAI2", "TYRO3", "RPS6KA2", "CLTC", "HNRNPAB", "WNT5A", "GRB2", "ACTG1", "PLXNB1", "FERMT2", "FES", "COL4A4", "NTN1", "CAP1", "FZD5", "MAP2K1", "STIP1", "S100A4", "TEK", "TRIO", "PARVA", "COL5A1", "PTEN", "RHOB", "ITGB1", "COL6A3", "RAB8A", "MYL6", "KCNQ3", "MET", "FN1", "BAIAP2", "ITGB3", "HSP…
376	ANION TRANSPORT%GO%GO:0006820	5.2532e-09	4.61332e-08	0.761461	0.383765	2.43848	126	c("SLCO4A1", "SLC1A5", "CA14", "PDPN", "SLC11A1", "PPARG", "SLC38A1", "SLC36A4", "SLC1A3", "SLC36A1", "AQP9", "SLC38A2", "SLC4A7", "SLC7A8", "SLC6A6", "SLC4A3", "FOLR2", "SLCO2A1", "CLIC4", "ABCC3", "FABP6", "SLCO2B1", "SLC7A1", "ACACB", "SLC25A13", "AKR1C3", "SLCO3A1", "PNPLA8", "SLC1A1", "SLC36A2", "SLC3A2", "SLC25A15", "CLIC1", "CLIC3", "SLC7A7", "SLC25A26", "SLC7A5", "SH3BP4", "SLC38A5", "SLC…
377	TRANSLATIONAL ELONGATION%GO%GO:0006414	5.33906e-09	4.67628e-08	0.761461	0.436752	2.5966	84	c("RPS27", "RPLP0", "RPS19", "RPL34", "RPL27A", "RPS5", "RPL29", "RPL18", "RPS18", "RPL24", "RPL13", "RPS17", "RPS3", "RPL35", "RPS15A", "EEF2K", "RPS2", "RPS28", "RPSA", "RPL41", "RPLP2", "RPL18A", "RPS10", "RPL12", "RPS9", "RPL36A", "EEF1D", "RPS6", "RPL21", "RPL28", "RPL26", "RPS12", "VARS", "RPL37A", "RPL38", "RPL10A", "RPS15", "RPL17", "RPL36", "RPL13A", "RPL4", "RPS16", "RPL27", "RPL11", "R…
378	MACROMOLECULAR COMPLEX DISASSEMBLY%GO%GO:0032984	5.42561e-09	4.73951e-08	0.761461	0.417472	2.51765	94	c("RPS27", "SMARCD2", "RPLP0", "RPS19", "RPL34", "RPL27A", "RPS5", "RPL29", "RPL18", "RPS18", "RPL24", "RPL13", "ETF1", "RPS17", "RPS3", "RPL35", "RPS15A", "SMARCA4", "RPS2", "RPS28", "RPSA", "RPL41", "RPLP2", "RPL18A", "RPS10", "RPL12", "RPS9", "RPL36A", "RPS6", "RPL21", "RPL28", "RPL26", "RPS12", "RPL37A", "RPL38", "RPL10A", "RPS15", "RPL17", "RPL36", "RPL13A", "RPL4", "RPS16", "RPL27", "ARID1A…
379	POSITIVE REGULATION OF NF-KAPPAB TRANSCRIPTION FACTOR ACTIVITY%GO%GO:0051092	5.53531e-09	4.82259e-08	0.761461	0.486377	2.6978	60	c("S100A9", "S100A8", "TLR4", "TLR2", "BTK", "IL6R", "IRAK1", "NOD2", "SPHK1", "WNT5A", "IRAK3", "MALT1", "PYCARD", "S100A12", "RIPK2", "NFKBIA", "NFKBIB", "TRIM5", "PSMA6", "RIPK1", "RIPK3", "NFKB1", "NLRP3", "PRKCH", "AGT", "CHUK", "PRKCI", "RELA", "MTDH", "IL6", "NLRC4", "UBA52", "IRAK2", "RBCK1", "NFKB2", "EDA", "IL1B", "TMEM189-UBE2V1", "CFLAR", "ALK", "PRKCQ", "CD40", "NTRK1", "MTPN", "IKBK…
380	TOLL-LIKE RECEPTOR 4 SIGNALING PATHWAY%GO%GO:0034142	5.65263e-09	4.91183e-08	0.761461	0.497345	2.72649	57	c("TLR4", "TLR2", "BTK", "IRAK1", "NOD2", "LY96", "RPS6KA2", "PIK3AP1", "MAP2K1", "RIPK2", "NFKBIA", "NFKBIB", "CD14", "RPS6KA1", "RIPK1", "MAPKAPK3", "IRAK4", "MYD88", "MAP2K4", "NFKB1", "ELK1", "DUSP7", "TICAM2", "TLR6", "CHUK", "MAP2K3", "JUN", "PELI1", "RELA", "FOS", "MAP2K2", "MAPK7", "UBA52", "IRAK2", "MAPK9", "NFKB2", "TICAM1", "TMEM189-UBE2V1", "PRKCE", "MAPKAPK2", "MAPK14", "IKBKB", "CRE…
381	CARBOHYDRATE METABOLISM%REACTOME%REACT_474.7	5.90368e-09	5.11652e-08	0.761461	0.372946	2.38455	132	c("HK2", "SLC2A1", "SLC2A3", "HK3", "CHST7", "SLC5A1", "ENO1", "LYVE1", "HAS2", "G6PD", "TKT", "GALK1", "ALDOA", "SLC2A5", "CD44", "CHSY1", "ST3GAL1", "B4GALT6", "CSPG4", "SLC25A13", "UGP2", "HYAL2", "PGD", "HS3ST2", "PFKFB3", "PGLS", "FBP1", "PPP2CB", "UST", "PYGL", "DSE", "SLC9A1", "NUP205", "B4GALT3", "PGAM2", "DCN", "PGM2", "NUP35", "PHKG2", "MDH2", "NAGLU", "NUP93", "GBE1", "CHST3", "B4GALT1…
382	NEGATIVE REGULATION OF BIOSYNTHETIC PROCESS%GO%GO:0009890	5.94435e-09	5.13828e-08	0.761461	0.286786	2.0381	356	c("BMP7", "BLM", "TSPYL2", "CD38", "OSR1", "HEY2", "ENO1", "IRF8", "BCL6", "PPARG", "LRP8", "MYC", "STAT3", "PLEK", "ACVRL1", "EDN1", "TCF21", "IL6R", "TGIF1", "GABBR2", "NRIP1", "DAB2", "DDX3X", "GLA", "SPI1", "PTGIS", "ZNF703", "PID1", "IRF1", "RUNX3", "BCL3", "IL10", "PER1", "SNAI2", "MLX", "ZBTB16", "UHRF1", "NF2", "WNT5A", "ZFP36", "PAWR", "NKX3-1", "AKR1C3", "USP2", "RARA", "ZNF593", "SOX11…
383	MYD88-INDEPENDENT CASCADE%REACTOME%REACT_6809.8	6.04091e-09	5.18106e-08	0.761461	0.485477	2.70287	62	c("BIRC3", "TLR4", "IL6R", "IRAK1", "NOD2", "LY96", "RPS6KA2", "JAK1", "UBE2D3", "MAP2K1", "S100A12", "RIPK2", "PPP2CB", "NFKBIA", "NFKBIB", "CD14", "RPS6KA1", "RIPK1", "MAPKAPK3", "MYD88", "RIPK3", "MAP2K4", "NFKB1", "ELK1", "DUSP7", "FADD", "TICAM2", "CHUK", "MAP2K3", "JUN", "RELA", "FOS", "BIRC2", "MAP2K2", "IL6", "MAPK7", "UBA52", "IRAK2", "MAPK9", "NFKB2", "TICAM1", "TMEM189-UBE2V1", "MAPKAP…
384	TOLL LIKE RECEPTOR 3 (TLR3) CASCADE%REACTOME%REACT_6783.8	6.04091e-09	5.18106e-08	0.761461	0.485477	2.70287	62	c("BIRC3", "TLR4", "IL6R", "IRAK1", "NOD2", "LY96", "RPS6KA2", "JAK1", "UBE2D3", "MAP2K1", "S100A12", "RIPK2", "PPP2CB", "NFKBIA", "NFKBIB", "CD14", "RPS6KA1", "RIPK1", "MAPKAPK3", "MYD88", "RIPK3", "MAP2K4", "NFKB1", "ELK1", "DUSP7", "FADD", "TICAM2", "CHUK", "MAP2K3", "JUN", "RELA", "FOS", "BIRC2", "MAP2K2", "IL6", "MAPK7", "UBA52", "IRAK2", "MAPK9", "NFKB2", "TICAM1", "TMEM189-UBE2V1", "MAPKAP…
385	TRIF-MEDIATED TLR3 TLR4 SIGNALING%REACTOME%REACT_25281.4	6.04091e-09	5.18106e-08	0.761461	0.485477	2.70287	62	c("BIRC3", "TLR4", "IL6R", "IRAK1", "NOD2", "LY96", "RPS6KA2", "JAK1", "UBE2D3", "MAP2K1", "S100A12", "RIPK2", "PPP2CB", "NFKBIA", "NFKBIB", "CD14", "RPS6KA1", "RIPK1", "MAPKAPK3", "MYD88", "RIPK3", "MAP2K4", "NFKB1", "ELK1", "DUSP7", "FADD", "TICAM2", "CHUK", "MAP2K3", "JUN", "RELA", "FOS", "BIRC2", "MAP2K2", "IL6", "MAPK7", "UBA52", "IRAK2", "MAPK9", "NFKB2", "TICAM1", "TMEM189-UBE2V1", "MAPKAP…
386	POSITIVE REGULATION OF CELL ACTIVATION%GO%GO:0050867	6.12797e-09	5.24211e-08	0.761461	0.429894	2.57081	88	c("CCL2", "NCKAP1L", "CD38", "MAP3K8", "TLR4", "PLEK", "BTK", "CD86", "CCL21", "THBS1", "TGFBR2", "PIK3R3", "NOD2", "HLA-DRA", "EBI3", "CD276", "FGR", "CD4", "AXL", "WNT5A", "GRB2", "AIF1", "LILRB2", "CD74", "HLA-DPA1", "RARA", "MALT1", "PYCARD", "YES1", "CAV1", "HLA-DRB4", "CD274", "CLCF1", "RPS6KA1", "PAK2", "HLA-DPB1", "LYN", "IL6ST", "IRS2", "CSK", "IGFBP2", "TNIP2", "TNFRSF14", "CDC42", "LIL…
387	CELL CYCLE PHASE%GO%GO:0022403	6.47138e-09	5.52157e-08	0.761461	0.357108	2.33114	154	c("BLM", "EIF4EBP1", "BCAT1", "CDKN1A", "RPS27", "E2F5", "CDK2", "PSME2", "KPNA2", "PSMD8", "CDK6", "PPP1CC", "PSMB8", "EPS8", "CDC7", "POLA2", "CLIP1", "AHCTF1", "RANGAP1", "SPC24", "PSME4", "E2F4", "KIF20A", "PSMA4", "PSME1", "PSMA6", "LSM10", "SEH1L", "PSMB6", "PPP6C", "KIF2A", "ACVR1B", "CENPE", "PSMD14", "PSMA3", "GSPT1", "NDEL1", "PSMD2", "E2F3", "CDKN2D", "MCM8", "B9D2", "PSMA5", "CDKN1C",…
388	CELL MORPHOGENESIS%GO%GO:0000902	6.65187e-09	5.6464e-08	0.761461	0.312715	2.15726	249	c("BMP7", "HEY2", "PDPN", "TYROBP", "CHL1", "TGFBR3", "PCNT", "HIF1A", "ITGA5", "EPB41L3", "SDCBP", "ITGA2", "RTN4RL1", "ABLIM3", "SNAI2", "TYRO3", "RPS6KA2", "CLTC", "HNRNPAB", "WNT5A", "GRB2", "ACTG1", "PLXNB1", "FERMT2", "FES", "COL4A4", "NTN1", "CAP1", "FZD5", "RPGR", "MAP2K1", "STIP1", "S100A4", "TEK", "TRIO", "PARVA", "COL5A1", "PTEN", "RHOB", "ITGB1", "COL6A3", "RAB8A", "MYL6", "KCNQ3", "M…
389	RIBONUCLEOPROTEIN COMPLEX%GO%GO:0030529	6.65187e-09	5.6464e-08	0.761461	0.312621	2.15661	249	c("PPIL1", "RPS27", "DDX3X", "SNRPB", "TDRD9", "RRBP1", "HSPA1B", "HNRNPAB", "RPLP0", "CARHSP1", "DDX23", "RPS19", "ZFP36", "EFTUD2", "RPL34", "PRPF4", "MRPL3", "MRPL36", "RPL27A", "RPS5", "RPL29", "MRPS12", "RPL18", "RPS18", "APEX1", "HNRNPF", "TRIM5", "RPL24", "RPL13", "RPS17", "RPS3", "RBM3", "RPL35", "SNRPG", "DHX9", "PES1", "MRPS24", "RPS15A", "UHMK1", "PSMA4", "HSPA14", "MRPL41", "RPS2", "L…
390	CELL CYCLE PROCESS%GO%GO:0022402	6.78103e-09	5.74127e-08	0.761461	0.282654	2.00417	347	c("BLM", "EIF4EBP1", "BCAT1", "MYC", "CDKN1A", "PCNT", "THBS1", "RPS27", "E2F5", "TUBG1", "CDK2", "PSME2", "IRF1", "BCL2L1", "KPNA2", "PSMD8", "TUBB", "TDRD9", "CDK6", "CLTC", "PPP1CC", "RAD9B", "PSMB8", "AURKA", "EPS8", "RBM38", "NKX3-1", "SOX11", "MAP2K1", "JTB", "CDC7", "POLA2", "PTEN", "RHOB", "CLIP1", "AHCTF1", "RANGAP1", "CAB39L", "SPC24", "MSH6", "NEK6", "PSME4", "E2F4", "KIF20A", "PA2G4",…
391	MITOTIC G1-G1 S PHASES%REACTOME%REACT_21267.3	7.80998e-09	6.58235e-08	0.74774	0.478104	2.67292	63	c("MYC", "CDKN1A", "E2F5", "CDK2", "PSME2", "PSMD8", "CDK6", "PSMB8", "CDC7", "POLA2", "PPP2CB", "E2F4", "PSMA4", "PSME1", "PSMA6", "PSMB6", "CCND3", "PSMD14", "PSMA3", "PSMD2", "E2F3", "CDKN2D", "MCM8", "PSMA5", "PSMD12", "FBXO5", "PSMD13", "PSME3", "PSMB3", "CDT1", "POLE2", "MCM10", "PSMB5", "UBA52", "MAX", "PSMC3", "PSMB9", "PSMB1", "PSMA7", "PSMD9", "CKS1B", "TFDP1", "PSMC4", "PSMD3", "CCNE1"…
392	NEURON PROJECTION DEVELOPMENT%GO%GO:0031175	7.8143e-09	6.58235e-08	0.74774	0.336978	2.25369	186	c("BMP7", "TYROBP", "CHL1", "ITGA5", "EPB41L3", "SDCBP", "ITGA2", "RTN4RL1", "ABLIM3", "RPS6KA2", "CLTC", "WNT5A", "GRB2", "ACTG1", "PLXNB1", "FES", "COL4A4", "NTN1", "CAP1", "FZD5", "MAP2K1", "STIP1", "TRIO", "COL5A1", "PTEN", "RHOB", "ITGB1", "COL6A3", "RAB8A", "MYL6", "KCNQ3", "MET", "BTG2", "UHMK1", "BAIAP2", "ITGB3", "HSP90AA1", "RPS6KA1", "PARD3", "PAK2", "CFL1", "CSNK2A1", "AP2S1", "RAC2",…
393	TRANSCRIPTION COFACTOR ACTIVITY%GO%GO:0003712	8.58925e-09	7.21672e-08	0.74774	0.335097	2.23683	184	c("LMCD1", "ATF3", "ENO1", "PPARG", "TGIF1", "SMARCD2", "NRIP1", "HES6", "HSF2", "NCOA7", "WWC1", "MSC", "HTATIP2", "BATF3", "PAWR", "HIPK2", "RARA", "ZNF593", "SOX11", "ELK4", "CITED4", "HDGF", "ARL2BP", "MED16", "APEX1", "ATF6", "NFKBIB", "LPIN2", "BCL9L", "PQBP1", "SMARCA4", "NFE2L3", "BTG1", "RXRA", "ATXN7L3", "RIPK3", "NR1H3", "NCOA3", "YY1", "CITED2", "NMI", "ELF3", "KCNIP3", "HSBP1", "SAP3…
394	NEGATIVE REGULATION OF CELLULAR MACROMOLECULE BIOSYNTHETIC PROCESS%GO%GO:2000113	8.97673e-09	7.52314e-08	0.74774	0.294784	2.06824	313	c("BMP7", "BLM", "TSPYL2", "CD38", "OSR1", "HEY2", "ENO1", "IRF8", "BCL6", "PPARG", "LRP8", "MYC", "STAT3", "ACVRL1", "EDN1", "TCF21", "TGIF1", "NRIP1", "DAB2", "DDX3X", "SPI1", "ZNF703", "PID1", "IRF1", "RUNX3", "BCL3", "PER1", "SNAI2", "MLX", "ZBTB16", "UHRF1", "NF2", "WNT5A", "ZFP36", "PAWR", "NKX3-1", "USP2", "RARA", "ZNF593", "SOX11", "ELK4", "UBE2D3", "NKX2-5", "IFI16", "NR1H2", "HDGF", "PD…
395	CELL-CELL SIGNALING%GO%GO:0007267	9.88085e-09	8.25989e-08	0.74774	0.297494	2.07173	286	c("NAMPT", "NPTX2", "S100A9", "KCNIP2", "KCNK1", "SYK", "FGF12", "NQO1", "CCR1", "SLC38A1", "ADCY3", "EDN1", "GLUL", "SLC1A3", "HCN4", "CD86", "SLC38A2", "KCNJ8", "CCL21", "GABBR2", "STAB1", "ZYX", "KCNH2", "C1QA", "SDCBP", "GCHFR", "KCNK3", "MERTK", "TNFAIP6", "IL10", "RPS6KA2", "ECE2", "ITGB2", "SH3KBP1", "GRB2", "VIPR1", "CD33", "LILRB2", "GRIN2A", "NCALD", "MUSK", "GNG12", "PMP22", "GRIK2", "…
396	NEGATIVE REGULATION OF SIGNAL TRANSDUCTION%GO%GO:0009968	1.05266e-08	8.77752e-08	0.74774	0.305322	2.11001	255	c("BMP7", "PPARG", "MYC", "TLR4", "PLEK", "DDIT4", "NKD2", "ADA", "TCF21", "THBS1", "TGFBR2", "PRKCD", "DUSP2", "SOCS1", "DAB2", "DDX3X", "FBN2", "DUSP1", "AXIN2", "CD44", "PID1", "BCL2L1", "IL10", "SNAI2", "TYRO3", "CLTC", "PPP1CC", "NF2", "WNT5A", "SH3KBP1", "GRB2", "IRAK3", "EPN1", "HYAL2", "HIPK2", "NKX3-1", "ERRFI1", "CD74", "NKX2-5", "PYCARD", "LRP4", "NR1H2", "FBP1", "PPP1CA", "PTEN", "RGS…
397	RECEPTOR COMPLEX%GO%GO:0043235	1.05664e-08	8.78846e-08	0.74774	0.473702	2.64831	63	c("OSMR", "SYK", "CSF1R", "TLR4", "TLR2", "IL6R", "IRAK1", "TGFBR2", "DAB2", "RAMP1", "LY96", "IL13RA1", "SDCBP", "CD4", "ITGB2", "PLXNB1", "GRIN2A", "CD74", "GRIN3A", "ITGB1", "TLR1", "CSF1", "ITGB3", "RIPK1", "RAMP3", "IL6ST", "STOML2", "AHR", "CHUK", "DIABLO", "CHRNA5", "BIRC2", "ERBB2", "ENG", "IL6", "TRADD", "ERBB3", "HTRA2", "ITGAL", "MYH9", "CD40", "IKBKB", "ACVR1", "ITGA1", "RNF31", "OSM"…
398	REGULATION OF MRNA STABILITY BY PROTEINS THAT BIND AU-RICH ELEMENTS%REACTOME%REACT_24994.2	1.10953e-08	9.20522e-08	0.74774	0.491333	2.69353	57	c("PRKCD", "TNPO1", "EIF4G1", "PSME2", "PSMD8", "HSPA1B", "ZFP36", "PSMB8", "EXOSC4", "PSME4", "PSMA4", "PSME1", "PSMA6", "YWHAZ", "PSMB6", "PSMD14", "PSMA3", "PSMD2", "PSMA5", "PSMD12", "ZFP36L1", "PSMD13", "PSME3", "YWHAB", "HSPA8", "PSMB3", "PSMB5", "UBA52", "TNFSF13", "KHSRP", "PABPC1", "HSPA1A", "MAPKAPK2", "PSMC3", "PSMB9", "PSMB1", "PSMA7", "PSMD9", "EXOSC3", "MAPK14", "PSMC4", "PSMD3", "P…
399	RESPONSE TO TOPOLOGICALLY INCORRECT PROTEIN%GO%GO:0035966	1.14272e-08	9.45678e-08	0.74774	0.443873	2.602	78	c("CCL2", "ATF3", "TSPYL2", "HSPA6", "ATF4", "ASNS", "SRPRB", "HSPA1B", "HSPB7", "HSPB3", "XBP1", "SERPINH1", "DNAJB9", "ADD1", "DERL1", "LMNA", "HDGF", "ATF6", "DNAJC3", "HSP90AA1", "HSP90B1", "DNAJB1", "SSR1", "KLHDC3", "SERP1", "PTPN1", "CALR", "RHBDD1", "WFS1", "TOR1B", "SHC1", "FKBP14", "PDIA6", "ACADVL", "CXXC1", "VCP", "EIF2S1", "HSPE1", "HSPA8", "DERL2", "HERPUD1", "HYOU1", "EDEM1", "RNF5…
400	SIGNALING BY PDGF%REACTOME%REACT_16888.4	1.15229e-08	9.51212e-08	0.74774	0.430698	2.54313	82	c("FGF7", "PDGFRA", "STAT3", "CDKN1A", "ADCY3", "CD86", "IL6R", "THBS1", "PRKAR2A", "PIK3R3", "PRKCD", "SPP1", "COL4A4", "JAK1", "MAP2K1", "PTEN", "BAD", "COL6A3", "FURIN", "RPS6KB2", "ITPR3", "PDGFRB", "ADCY1", "NR4A1", "IRS2", "NRAS", "CHUK", "COL6A2", "CALM2", "ERBB2", "FOXO3", "MAP2K2", "IL6", "ADCY7", "YWHAB", "COL6A1", "SOS1", "KRAS", "COL4A3", "CRKL", "RAF1", "KLB", "BCAR1", "VAV1", "STAT5…
401	LYSOSOME%GO%GO:0005764	1.18895e-08	9.76596e-08	0.74774	0.383659	2.41339	120	c("CTSC", "IFI30", "CTSB", "SLC11A1", "SRGN", "LAPTM5", "ADA", "HLA-DMA", "STXBP2", "HLA-DRA", "HLA-DMB", "GLA", "CTSS", "LITAF", "UNC93B1", "CSPG4", "TLR8", "SLC11A2", "HYAL2", "PSAP", "CD74", "HLA-DPA1", "LGMN", "NPC2", "NCF4", "SLC15A3", "NCF1", "TXNDC5", "TMBIM1", "NPC1", "AP1B1", "HLA-DRB4", "CTSH", "DCN", "CD164", "SCARB2", "HLA-DPB1", "RAMP3", "HCK", "RNASET2", "RAB27A", "RAB9A", "NAGLU", …
402	LYTIC VACUOLE%GO%GO:0000323	1.18895e-08	9.76596e-08	0.74774	0.383659	2.41339	120	c("CTSC", "IFI30", "CTSB", "SLC11A1", "SRGN", "LAPTM5", "ADA", "HLA-DMA", "STXBP2", "HLA-DRA", "HLA-DMB", "GLA", "CTSS", "LITAF", "UNC93B1", "CSPG4", "TLR8", "SLC11A2", "HYAL2", "PSAP", "CD74", "HLA-DPA1", "LGMN", "NPC2", "NCF4", "SLC15A3", "NCF1", "TXNDC5", "TMBIM1", "NPC1", "AP1B1", "HLA-DRB4", "CTSH", "DCN", "CD164", "SCARB2", "HLA-DPB1", "RAMP3", "HCK", "RNASET2", "RAB27A", "RAB9A", "NAGLU", …
403	Focal adhesion%KEGG%hsa04510	1.2267e-08	1.0051e-07	0.74774	0.396943	2.46361	109	c("BIRC3", "PDGFRA", "PARVB", "THBS1", "ITGA11", "PIK3R3", "ITGA5", "PARVG", "ZYX", "ITGA2", "SPP1", "PPP1CC", "ITGA7", "GRB2", "ACTG1", "ITGA3", "COL5A3", "COL4A4", "LAMC2", "MAP2K1", "PARVA", "COL5A1", "PPP1CA", "PTEN", "ITGB1", "BAD", "COL6A3", "CAV1", "MET", "PIK3R5", "VWF", "FN1", "CAV2", "ITGB3", "TNC", "PAK2", "PDGFRB", "LAMB3", "CCND3", "RAC2", "ELK1", "FLT1", "RAP1B", "VASP", "JUN", "COL…
404	TOLL SIGNALING PATHWAY%GO%GO:0008063	1.23675e-08	1.01083e-07	0.74774	0.492872	2.67086	55	c("TLR4", "TLR2", "BTK", "IRAK1", "NOD2", "LY96", "RPS6KA2", "MAP2K1", "RIPK2", "NFKBIA", "NFKBIB", "CD14", "RPS6KA1", "RIPK1", "MAPKAPK3", "IRAK4", "MYD88", "MAP2K4", "NFKB1", "ELK1", "DUSP7", "TICAM2", "TLR6", "CHUK", "MAP2K3", "JUN", "PELI1", "RELA", "FOS", "MAP2K2", "MAPK7", "UBA52", "IRAK2", "MAPK9", "NFKB2", "TICAM1", "TMEM189-UBE2V1", "MAPKAPK2", "MAPK14", "IKBKB", "CREB1", "IRF7", "IKBKG"…
405	CELLULAR PROTEIN COMPLEX DISASSEMBLY%GO%GO:0043624	1.30853e-08	1.06423e-07	0.74774	0.429887	2.53834	82	c("RPS27", "RPLP0", "RPS19", "RPL34", "RPL27A", "RPS5", "RPL29", "RPL18", "RPS18", "RPL24", "RPL13", "ETF1", "RPS17", "RPS3", "RPL35", "RPS15A", "RPS2", "RPS28", "RPSA", "RPL41", "RPLP2", "RPL18A", "RPS10", "RPL12", "RPS9", "RPL36A", "RPS6", "RPL21", "RPL28", "RPL26", "RPS12", "RPL37A", "RPL38", "RPL10A", "RPS15", "RPL17", "RPL36", "RPL13A", "RPL4", "RPS16", "RPL27", "RPL11", "RPL39", "RPS7", "MI…
406	PROTEIN COMPLEX DISASSEMBLY%GO%GO:0043241	1.30853e-08	1.06423e-07	0.74774	0.429887	2.53834	82	c("RPS27", "RPLP0", "RPS19", "RPL34", "RPL27A", "RPS5", "RPL29", "RPL18", "RPS18", "RPL24", "RPL13", "ETF1", "RPS17", "RPS3", "RPL35", "RPS15A", "RPS2", "RPS28", "RPSA", "RPL41", "RPLP2", "RPL18A", "RPS10", "RPL12", "RPS9", "RPL36A", "RPS6", "RPL21", "RPL28", "RPL26", "RPS12", "RPL37A", "RPL38", "RPL10A", "RPS15", "RPL17", "RPL36", "RPL13A", "RPL4", "RPS16", "RPL27", "RPL11", "RPL39", "RPS7", "MI…
407	BETA1 INTEGRIN CELL SURFACE INTERACTIONS%PATHWAY INTERACTION DATABASE NCI-NATURE CURATED DATA%BETA1 INTEGRIN CELL SURFACE INTERACTIONS	1.33962e-08	1.08417e-07	0.74774	0.560246	2.76326	38	c("F13A1", "TGM2", "PLAU", "THBS1", "ITGA11", "ITGA5", "NID1", "TGFBI", "ITGA2", "SPP1", "CSPG4", "ITGA7", "ITGA3", "COL4A4", "LAMC2", "PLAUR", "COL5A1", "ITGB1", "COL6A3", "FBN1", "FN1", "CD14", "TNC", "LAMB3", "COL6A2", "COL1A1", "COL18A1", "COL6A1", "COL4A3")
408	B CELL ACTIVATION%REACTOME%REACT_118773.4	1.33962e-08	1.08417e-07	0.74774	0.404408	2.48279	101	c("FGF7", "SYK", "PDGFRA", "CDKN1A", "BTK", "CD86", "PIK3R3", "PSME2", "PSMD8", "CBLB", "SH3KBP1", "PIK3AP1", "PSMB8", "MALT1", "PTEN", "BAD", "NFKBIA", "NFKBIB", "RPS6KB2", "PSME4", "ITPR3", "PSMA4", "DAPP1", "PSME1", "PSMA6", "PDGFRB", "PSMB6", "LYN", "NFKB1", "PSMD14", "PSMA3", "NR4A1", "IRS2", "PSMD2", "NRAS", "CHUK", "PSMA5", "PSMD12", "RELA", "CALM2", "ERBB2", "FOXO3", "PSMD13", "PSME3", "S…
409	ION TRANSMEMBRANE TRANSPORTER ACTIVITY%GO%GO:0015075	1.41624e-08	1.14338e-07	0.74774	0.323232	2.17873	199	c("ATP2A2", "SLC1A5", "KCNIP2", "KCNK1", "ATP1A1", "SLC5A1", "PLP2", "PDPN", "SLC11A1", "SLC9A7", "SLC38A1", "SLC1A3", "HCN4", "AQP9", "KCNJ8", "SLC4A7", "SLC7A8", "SLC4A3", "SLC39A14", "CLIC4", "ABCC3", "KCNH2", "MAGT1", "KCNK3", "SLCO2B1", "SLC11A2", "HVCN1", "P2RX5", "SLC25A13", "GRIK2", "SLC1A1", "SLC36A2", "GPR89B", "GRIN3A", "PDE2A", "KCNN2", "SLC30A3", "SLC3A2", "SLC9A1", "CLCN3", "SLC39A1…
410	REGULATION OF ANATOMICAL STRUCTURE MORPHOGENESIS%GO%GO:0022603	1.44078e-08	1.16036e-07	0.74774	0.319834	2.17301	214	c("CCL2", "BMP7", "CCL11", "FGF7", "FGD2", "VASH2", "PARVB", "OSR1", "HEY2", "ANGPTL4", "LRP8", "MYC", "CSF1R", "CDC42EP4", "HMOX1", "EDN1", "HIF1A", "THBS1", "STAB1", "EPB41L3", "NGF", "ALDOA", "DAB2", "SERPINE1", "AXIN2", "CD44", "PTGIS", "ZNF703", "PID1", "FGR", "NGFR", "SPHK1", "WNT5A", "ITGB2", "SH3KBP1", "PLXNB1", "CORO1A", "ANXA3", "HTATIP2", "FES", "EPS8", "HIPK2", "CST3", "EGLN1", "CDC42…
411	Staphylococcus aureus infection%KEGG%hsa05150	1.45272e-08	1.16712e-07	0.74774	0.525908	2.71491	45	c("C3", "FPR1", "CFD", "C1R", "C1QC", "C3AR1", "HLA-DMA", "ITGAM", "C1S", "HLA-DRA", "HLA-DMB", "FPR3", "C1QA", "C1QB", "C5AR1", "IL10", "ITGB2", "FCGR2A", "FCGR2B", "C2", "HLA-DPA1", "FCAR", "HLA-DRB4", "CFI", "HLA-DPB1")
412	POSITIVE REGULATION OF LYMPHOCYTE ACTIVATION%GO%GO:0051251	1.45679e-08	1.16755e-07	0.74774	0.441428	2.58767	78	c("CCL2", "NCKAP1L", "CD38", "MAP3K8", "BTK", "CD86", "CCL21", "TGFBR2", "PIK3R3", "NOD2", "HLA-DRA", "EBI3", "CD276", "CD4", "AXL", "GRB2", "AIF1", "LILRB2", "CD74", "HLA-DPA1", "RARA", "MALT1", "PYCARD", "YES1", "CAV1", "HLA-DRB4", "CD274", "CLCF1", "PAK2", "HLA-DPB1", "LYN", "IL6ST", "IRS2", "CSK", "IGFBP2", "TNIP2", "TNFRSF14", "CDC42", "LILRB1", "IL6", "PTPN6", "HLA-DRB3", "MIF", "TNFSF13", …
413	TSLP%NETPATH%TSLP	1.50019e-08	1.19943e-07	0.733762	0.41013	2.50067	98	c("EIF4EBP1", "FCER1G", "DOCK2", "SEMA4B", "STAT3", "LCP1", "BTK", "SKAP2", "ADD1", "FES", "JAK1", "LMNA", "MAP2K1", "AHCTF1", "DOK2", "ICAM2", "YES1", "MPRIP", "CDV3", "NFKBIA", "DAPP1", "ITGB3", "PUF60", "HSP90AA1", "ZC3HAV1", "LMNB1", "LYN", "NFKB1", "HCK", "NCOA3", "RPS6", "TAGLN2", "CD84", "PPP1R11", "VASP", "SP110", "DOCK5", "RELA", "GPSM3", "RPL4", "SHC1", "CALM2", "FOXO3", "SRRM2", "MTDH"…
414	PEPTIDYL-AMINO ACID MODIFICATION%GO%GO:0018193	1.51866e-08	1.21126e-07	0.733762	0.322442	2.18579	209	c("FKBP5", "GFPT2", "PDGFRA", "ALG3", "CSF1R", "UAP1", "AGTPBP1", "EFEMP1", "P4HB", "TGFBR2", "PRKCD", "RPN1", "MCFD2", "SPI1", "EDEM2", "FGR", "GNPNAT1", "B4GALT6", "MGAT4A", "FES", "EIF5A", "HIPK2", "PMM2", "POLE4", "EGLN1", "RPN2", "ALG8", "MAN1A1", "TEK", "JMJD6", "MAPK13", "ALG5", "FURIN", "SEC24D", "NEK6", "DPH3", "PPIB", "B4GALT3", "UHMK1", "DDOST", "MAN2A2", "PAK2", "MAPKAPK3", "PDGFRB", …
415	REGULATION OF GROWTH%GO%GO:0040008	1.5753e-08	1.25341e-07	0.733762	0.369661	2.36977	134	c("S100A9", "SPOCK1", "TSPYL2", "CHPT1", "ENO1", "MT1X", "S100A8", "BCL6", "CDKN1A", "ACVRL1", "FAM107A", "DCUN1D3", "DDX3X", "AGTR1", "IL17RB", "HSPA1B", "SPHK1", "HYAL2", "MT2A", "MUSK", "FGFRL1", "CD320", "CXCL16", "EXOSC4", "FBP1", "PTEN", "OSGIN1", "MT1M", "ITCH", "MT1G", "SMARCA4", "BTG1", "RPS6KA1", "SH3BP4", "CSNK2A1", "NOTCH1", "ACVR1B", "CRLF3", "EI24", "MT1A", "BLZF1", "AGT", "RNF6", "…
416	HOST INTERACTIONS OF HIV FACTORS%REACTOME%REACT_6288.4	1.68961e-08	1.34113e-07	0.733762	0.448713	2.60851	73	c("DOCK2", "PSME2", "CD4", "B2M", "PSMD8", "PSMB8", "RANGAP1", "NUP205", "PSME4", "AP1B1", "PSMA4", "PSME1", "PSMA6", "PAK2", "NUP35", "AP2S1", "PSMB6", "HCK", "PSMD14", "PSMA3", "NUP93", "HLA-A", "PSMD2", "PPIA", "AP1G1", "PSMA5", "PSMD12", "KPNB1", "PSMD13", "PSME3", "TCEB1", "NUP88", "PSMB3", "NUP85", "RAN", "PSMB5", "UBA52", "RAE1", "AP2A2", "RANBP1", "KPNA1", "PSMC3", "PSMB9", "HMGA1", "PSMB…
417	POSITIVE REGULATION OF LEUKOCYTE ACTIVATION%GO%GO:0002696	1.71235e-08	1.35592e-07	0.733762	0.427617	2.54229	84	c("CCL2", "NCKAP1L", "CD38", "MAP3K8", "BTK", "CD86", "CCL21", "THBS1", "TGFBR2", "PIK3R3", "NOD2", "HLA-DRA", "EBI3", "CD276", "FGR", "CD4", "AXL", "WNT5A", "GRB2", "AIF1", "LILRB2", "CD74", "HLA-DPA1", "RARA", "MALT1", "PYCARD", "YES1", "CAV1", "HLA-DRB4", "CD274", "CLCF1", "PAK2", "HLA-DPB1", "LYN", "IL6ST", "IRS2", "CSK", "IGFBP2", "TNIP2", "TNFRSF14", "CDC42", "LILRB1", "IL6", "PTPN6", "HLA-…
418	INTEGRIN CELL SURFACE INTERACTIONS%REACTOME%REACT_13552.2	1.79259e-08	1.41606e-07	0.733762	0.50872	2.69553	50	c("SYK", "APBB1IP", "THBS1", "ITGA11", "ITGAM", "ITGA5", "ICAM3", "ITGA2", "SPP1", "ITGA7", "ITGB2", "ITGA3", "COL4A4", "LAMC2", "ICAM2", "ITGB1", "VWF", "FBN1", "FN1", "ITGB3", "TNC", "RAPGEF3", "LAMB3", "PTPN1", "RAP1B", "CSK", "SHC1", "COL1A1", "ITGB8", "SOS1", "COL4A3", "BCAR1", "ITGAX", "RAPGEF4", "COL4A2", "ITGAL", "RASGRP2", "F11R")
419	GOLGI APPARATUS PART%GO%GO:0044431	1.80421e-08	1.42184e-07	0.733762	0.334476	2.23542	185	c("QSOX1", "CHST7", "CHPT1", "SLC9A7", "CHST9", "NGF", "HLA-DRA", "TMED3", "CHSY1", "ST3GAL1", "B2M", "TNFRSF1A", "UNC93B1", "B4GALT6", "CSPG4", "TLR8", "SGMS2", "HYAL2", "MGAT4A", "CABP1", "HS3ST2", "NCALD", "CD74", "HLA-DPA1", "MAN1A1", "GPR89B", "UST", "DSE", "FURIN", "ATF6", "TMED9", "UGCG", "CAV1", "B4GALT3", "AP1B1", "HLA-DRB4", "TMED2", "HLA-E", "GPR89A", "OCRL", "MAN2A2", "DCN", "ICA1", "…
420	INTERFERON SIGNALING%REACTOME%REACT_25229.1	1.8692e-08	1.46901e-07	0.733762	0.405625	2.46699	97	c("SOCS3", "IFI30", "IRF8", "ISG20", "IFITM2", "PRKCD", "SOCS1", "HLA-DRA", "EIF4G1", "CD44", "IRF1", "KPNA2", "B2M", "EIF4A1", "IFI27", "IFNGR1", "MT2A", "IFITM1", "PSMB8", "GBP1", "HLA-DPA1", "JAK1", "IFITM3", "GBP2", "NUP205", "HLA-DRB4", "HLA-E", "NUP35", "HLA-DPB1", "UBE2L6", "IFI35", "IRF5", "PTPN1", "TRIM25", "NUP93", "HLA-A", "GBP3", "KPNB1", "HLA-B", "GBP5", "FCGR1A", "OAS1", "STAT2", "F…
421	Neurotrophin signaling pathway%KEGG%hsa04722	1.87297e-08	1.46901e-07	0.733762	0.44501	2.59923	75	c("IRAK1", "PIK3R3", "PRKCD", "ATF4", "NGF", "NGFR", "RPS6KA2", "GRB2", "IRAK3", "ARHGDIB", "MAP2K1", "RIPK2", "BAD", "MAPK13", "NFKBIA", "NFKBIB", "YWHAH", "PIK3R5", "RPS6KA1", "YWHAZ", "IRAK4", "NFKB1", "ARHGDIA", "RAP1B", "IRS2", "CSK", "NRAS", "JUN", "RELA", "CDC42", "SHC1", "CALM2", "FOXO3", "MAP2K2", "RHOA", "YWHAB", "MAPK7", "SOS1", "KRAS", "ABL1", "IRAK2", "CRKL", "MAPK9", "RAF1", "SH2B3"…
422	PROTEIN FOLDING%GO%GO:0006457	1.89344e-08	1.48155e-07	0.733762	0.41862	2.49136	85	c("FKBP5", "QSOX1", "TUBA3D", "GLRX2", "TUBA1C", "MPDU1", "P4HB", "CCT2", "EDEM2", "TUBA1B", "HSPA1B", "SPHK1", "TUBB2A", "ATF6", "TCP1", "TUBA1A", "SIL1", "TUBB6", "HSPA14", "TUBB2B", "ITGB3", "HSP90AA1", "CSNK2A1", "DNAJB1", "PFDN6", "FKBP4", "CALR", "CCT7", "TUBA3C", "TUBA4A", "TUBB3", "AHSA1", "LRPAP1", "WFS1", "PPIA", "GANAB", "RP2", "CHORDC1", "PDIA6", "LMAN1", "CCT5", "ACTB", "BAG3", "HSPA…
423	KITRECEPTOR%NETPATH%KITRECEPTOR	1.91266e-08	1.49305e-07	0.733762	0.468565	2.61958	63	c("EIF4EBP1", "WAS", "STAT3", "BTK", "SKAP2", "SOCS1", "PTPRU", "CDK2", "TNFRSF10A", "FGR", "CLTC", "CBLB", "SH3KBP1", "GRB2", "FES", "MAP2K1", "DOK2", "BAD", "YES1", "ACTR2", "RPS6KA1", "DOK3", "LYN", "HCK", "ELK1", "RPS6", "INPP5D", "G3BP1", "DOK1", "JUN", "RELA", "SHC1", "FOXO3", "MAP2K2", "PTPN6", "SOS1", "ABL1", "CRKL", "MSN", "RAF1", "SH2B3", "VAV1", "STAT5A", "FYB")
424	PROTEIN POLYUBIQUITINATION%GO%GO:0000209	1.98175e-08	1.54333e-07	0.733762	0.43067	2.52622	79	c("PSME2", "RNF41", "PSMD8", "PSMB8", "UBE2D3", "TRIM5", "LRSAM1", "PSME4", "UBE2V2", "ITCH", "PSMA4", "PSME1", "PSMA6", "UBE3C", "PSMB6", "PSMD14", "PSMA3", "ANAPC7", "PSMD2", "RNF6", "PSMA5", "PSMD12", "TRIM21", "BIRC2", "PSMD13", "ANAPC5", "PSME3", "UBE2G1", "UBE2L3", "HUWE1", "PSMB3", "PSMB5", "RUSC1", "UBA52", "RBCK1", "RNF5", "RNF216", "TMEM189-UBE2V1", "PSMC3", "CDC34", "PSMB9", "PSMB1", "…
425	LIPID BINDING%GO%GO:0008289	2.06794e-08	1.60667e-07	0.733762	0.35998	2.33364	146	c("APOB", "S1PR3", "PLA2G2A", "S100A9", "CHPT1", "S100A8", "PPARG", "TLR4", "PLEK", "GRK5", "SEC14L2", "TLR2", "BTK", "ABCG1", "AKR1C2", "THBS1", "FABP5", "ANXA2", "ALOX5AP", "PREX1", "AXL", "PICALM", "ANXA3", "FERMT2", "DGKD", "FES", "PSAP", "SNX10", "OSBPL3", "AKR1C3", "MAL", "RARA", "ANXA5", "SYTL4", "OSBPL8", "NPC2", "PYGL", "BAD", "ADAP2", "NCF1", "NDUFAB1", "ANXA1", "CAV1", "RBP1", "NPC1", …
426	SECRETION%GO%GO:0046903	2.14812e-08	1.66505e-07	0.733762	0.361379	2.3222	138	c("FGF7", "CFD", "F13A1", "SYK", "F5", "SRGN", "CCR1", "CEL", "F8", "PLEK", "EDN1", "SERPINA1", "SLC38A2", "THBS1", "STXBP2", "ALDOA", "PDIA4", "SERPINE1", "WDR1", "STEAP3", "TYRO3", "TIMP1", "ANXA3", "PSAP", "CD63", "CAP1", "PNPLA8", "S100A12", "SERPING1", "RAB8A", "FURIN", "CCL8", "VWF", "FN1", "STX12", "ITGB3", "CFL1", "LYN", "HCK", "RAB27A", "TUBA4A", "GAL", "CALU", "PFN1", "STX2", "PPIA", "P…
427	LIPID BIOSYNTHETIC PROCESS%GO%GO:0008610	2.1936e-08	1.69632e-07	0.733762	0.319895	2.16852	209	c("LPCAT3", "SGPP2", "PLA2G2A", "PTDSS1", "GGT5", "CHPT1", "CDS1", "SREBF1", "NANS", "ABHD5", "EBP", "PLSCR1", "ALOX5", "EDN1", "GPD1", "SLC44A3", "G6PD", "PIK3R3", "ALOX5AP", "ETNK2", "PDSS1", "PTGIS", "LPCAT4", "FASN", "SPHK1", "ACSL5", "SGMS2", "PMVK", "PIGA", "ACLY", "ELOVL5", "AKR1C3", "CD74", "PLAUR", "PNPLA8", "HADHB", "PIGH", "PIGT", "NSDHL", "PTEN", "AGPAT3", "HSD17B12", "AKR1B1", "LPIN2…
428	VASCULATURE DEVELOPMENT%GO%GO:0001944	2.2568e-08	1.74111e-07	0.733762	0.388283	2.39258	105	c("CCL2", "SYK", "PDGFRA", "OSR1", "HEY2", "PDPN", "HMOX1", "ACVRL1", "TCF21", "THBS1", "TGFBR2", "ITGA5", "ANXA2", "RAMP1", "SERPINE1", "TGFBI", "SAT1", "ANGPT2", "ERRFI1", "ENPEP", "FZD5", "NKX2-5", "TEK", "ACTA2", "PARVA", "JMJD6", "CAV1", "SFRP5", "ITGB3", "PDGFRB", "WNT5B", "NOTCH1", "ANGPT1", "LRP1", "FLT1", "NR4A1", "EPHB4", "AHR", "ANG", "SRPK2", "ENG", "COL1A1", "ITGB8", "RBPJ", "CCM2", …
429	POSITIVE REGULATION OF CYTOKINE PRODUCTION%GO%GO:0001819	2.36829e-08	1.82286e-07	0.733762	0.418763	2.5131	90	c("C3", "SLC11A1", "CSF1R", "TLR4", "IL17RA", "TLR2", "HIF1A", "IL6R", "THBS1", "NOD2", "DDX3X", "SERPINE1", "IRF1", "WNT5A", "LILRB2", "CD74", "RARA", "MALT1", "FZD5", "PYCARD", "IFI16", "RIPK2", "MAPK13", "NFKBIA", "NFKBIB", "CD14", "ZC3HAV1", "RIPK1", "MYD88", "RIPK3", "NFKB1", "IRF5", "IL6ST", "NLRP3", "FADD", "TLR5", "AGT", "CHUK", "RELA", "LILRB1", "ADIPOQ", "IL6", "PTGS2", "IL15", "HPSE", …
430	REGULATION OF PEPTIDASE ACTIVITY%GO%GO:0052547	2.41091e-08	1.84834e-07	0.733762	0.362387	2.31703	132	c("SERPINA3", "S100A9", "BIRC3", "SPOCK1", "TNFAIP8", "S100A8", "PPARG", "MYC", "TFPI", "SERPINA1", "THBS1", "DDX3X", "SERPINE1", "CD44", "TNFRSF10A", "MTCH1", "SLC11A2", "IFI27", "SERPINH1", "CAST", "SERPINB1", "NKX3-1", "CST3", "PYCARD", "IFI16", "GPX1", "SERPINB8", "SERPING1", "BAD", "FURIN", "RPS3", "CAV1", "ECM1", "RPS6KA1", "RIPK1", "CTSH", "PAK2", "PCOLCE", "BAK1", "ADRM1", "CSNK2A1", "CAS…
431	MYD88-DEPENDENT TOLL-LIKE RECEPTOR SIGNALING PATHWAY%GO%GO:0002755	2.41258e-08	1.84834e-07	0.733762	0.506336	2.6829	50	c("TLR4", "TLR2", "BTK", "IRAK1", "NOD2", "LY96", "RPS6KA2", "IRAK3", "MAP2K1", "RIPK2", "NFKBIA", "NFKBIB", "RPS6KA1", "MAPKAPK3", "IRAK4", "MYD88", "MAP2K4", "NFKB1", "ELK1", "DUSP7", "TLR5", "TLR6", "CHUK", "MAP2K3", "JUN", "PELI1", "RELA", "FOS", "MAP2K2", "MAPK7", "UBA52", "IRAK2", "MAPK9", "NFKB2", "TMEM189-UBE2V1", "MAPKAPK2", "MAPK14", "IKBKB", "CREB1", "IKBKG")
432	CELLULAR RESPONSE TO HORMONE STIMULUS%GO%GO:0032870	2.48911e-08	1.89924e-07	0.733762	0.362185	2.31575	132	c("BMP7", "NAMPT", "SOCS3", "FGF7", "EIF4EBP1", "CTSB", "PPARG", "STAT3", "ADCY3", "AKR1C2", "PRKAR2A", "SOCS1", "EIF4G1", "CTSS", "MYO5A", "PDK4", "GRB2", "GNG12", "NKX3-1", "AKR1C3", "ATP6V1A", "RARA", "MAP2K1", "CAB39L", "ANXA1", "EEF2K", "PTGER2", "BAIAP2", "CTSH", "ATP6V0A2", "STRADB", "LYN", "NOTCH1", "ADIPOR2", "ADCY1", "RPS6", "PTPN1", "ATP6V0A1", "ATP6V1F", "IRS2", "TCIRG1", "SLIT3", "NR…
433	ENERGY RESERVE METABOLIC PROCESS%GO%GO:0006112	2.49052e-08	1.89924e-07	0.733762	0.459114	2.58407	64	c("GFPT2", "SLC2A1", "MYC", "ADCY3", "PRKAR2A", "TKT", "PID1", "FASN", "MLX", "SPCS3", "ACACB", "UGP2", "GNG12", "ACLY", "PYGL", "SEC11C", "IQGAP1", "SPCS2", "ITPR3", "PGM2", "RAPGEF3", "ADCY1", "PHKG2", "RAP1B", "GBE1", "SEC11A", "MLXIPL", "CACNA1E", "CALM2", "ADCY7", "PCSK1", "GYG2", "KCNJ11", "STX1A", "STXBP1", "GYG1", "GLP1R", "RAPGEF4", "CALM3", "MT3", "ACACA", "ADCY9", "GNB2", "PYGM", "PRKA…
434	TNFALPHA%IOB%TNFALPHA	2.53615e-08	1.92957e-07	0.733762	0.354942	2.30325	147	c("FKBP5", "SYK", "MAP3K8", "PRKCD", "NFKBIZ", "DDX3X", "KPNA2", "TNFRSF1A", "BCL3", "PAPOLA", "HSPA1B", "BID", "USP2", "UBE2D3", "MAP2K1", "TNFRSF1B", "ALPL", "NFKBIA", "NFKBIB", "YWHAH", "CAV1", "SMARCA4", "HSP90AA1", "RIPK1", "YWHAZ", "CSNK2A1", "RIPK3", "PPP6C", "NFKB1", "CASP7", "AKAP8", "NSMAF", "FADD", "PSMD2", "DOK1", "FANCD2", "TNIP2", "CHUK", "JUN", "PSMD12", "RELA", "COPB2", "RPL4", "B…
435	NONSENSE MEDIATED DECAY ENHANCED BY THE EXON JUNCTION COMPLEX%REACTOME%REACT_75822.1	2.65347e-08	2.00958e-07	0.733762	0.416199	2.48667	87	c("RPS27", "EIF4G1", "RPLP0", "RPS19", "RPL34", "RPL27A", "RPS5", "RPL29", "RPL18", "RPS18", "RPL24", "RPL13", "ETF1", "RPS17", "RPS3", "RPL35", "RPS15A", "RPS2", "MAGOH", "RPS28", "RPSA", "RPL41", "RPLP2", "RPL18A", "RPS10", "RPL12", "RPS9", "RPL36A", "RPS6", "RPL21", "RPL28", "RPL26", "RPS12", "RPL37A", "RPL38", "RPL10A", "RPS15", "RPL17", "RPL36", "RPL13A", "RPL4", "RPS16", "RPL27", "RPL11", "…
436	NONSENSE-MEDIATED DECAY%REACTOME%REACT_75886.2	2.65347e-08	2.00958e-07	0.733762	0.416199	2.48667	87	c("RPS27", "EIF4G1", "RPLP0", "RPS19", "RPL34", "RPL27A", "RPS5", "RPL29", "RPL18", "RPS18", "RPL24", "RPL13", "ETF1", "RPS17", "RPS3", "RPL35", "RPS15A", "RPS2", "MAGOH", "RPS28", "RPSA", "RPL41", "RPLP2", "RPL18A", "RPS10", "RPL12", "RPS9", "RPL36A", "RPS6", "RPL21", "RPL28", "RPL26", "RPS12", "RPL37A", "RPL38", "RPL10A", "RPS15", "RPL17", "RPL36", "RPL13A", "RPL4", "RPS16", "RPL27", "RPL11", "…
437	ER-PHAGOSOME PATHWAY%REACTOME%REACT_111178.1	2.70069e-08	2.04066e-07	0.733762	0.515581	2.6897	46	c("SEC61A1", "PSME2", "B2M", "PSMD8", "PSMB8", "TAP1", "PSME4", "SEC61B", "PSMA4", "HLA-E", "PSME1", "PSMA6", "PSMB6", "CALR", "PSMD14", "PSMA3", "HLA-A", "PSMD2", "TAP2", "PSMA5", "PSMD12", "HLA-B", "PSMD13", "PSME3", "PSMB3", "SEC61G", "PSMB5", "UBA52", "PSMC3", "PSMB9", "PSMB1", "PSMA7", "PSMD9", "PSMC4", "PSMD3", "PSMC5", "TAPBP", "HLA-F")
438	LARGE RIBOSOMAL SUBUNIT%GO%GO:0015934	2.71074e-08	2.04358e-07	0.733762	0.482331	2.64418	57	c("RPLP0", "RPL34", "MRPL3", "MRPL36", "RPL27A", "RPL29", "RPL18", "RPL24", "RPL13", "RBM3", "RPL35", "MRPS24", "MRPL41", "RPL41", "RPLP2", "RPL18A", "RPL12", "RPL36A", "RPL21", "RPL28", "MRPL51", "RPL26", "MRPL23", "RPL37A", "RPL38", "RPL10A", "FXR2", "RPL17", "RPL36", "RPL13A", "RPL4", "RPL27", "RPL11", "RPL39", "RPL6", "UBA52", "RPL19", "RPL8")
439	CELLULAR RESPONSE TO UNFOLDED PROTEIN%GO%GO:0034620	2.76158e-08	2.07716e-07	0.733762	0.477964	2.61034	56	c("CCL2", "ATF3", "TSPYL2", "ATF4", "ASNS", "SRPRB", "XBP1", "DNAJB9", "ADD1", "DERL1", "LMNA", "HDGF", "ATF6", "DNAJC3", "HSP90B1", "SSR1", "KLHDC3", "SERP1", "PTPN1", "CALR", "RHBDD1", "WFS1", "SHC1", "FKBP14", "PDIA6", "ACADVL", "CXXC1", "VCP", "EIF2S1", "DERL2", "HERPUD1", "HYOU1", "EDEM1", "HSPA5", "YIF1A", "AMFR", "ATP6V0D1", "DNAJB11", "CREB3", "PDIA5", "ZBTB17", "PREB", "GOSR2", "PLA2G4B"…
440	SMALL GTPASE MEDIATED SIGNAL TRANSDUCTION%GO%GO:0007264	2.79983e-08	2.10115e-07	0.733762	0.36852	2.34978	128	c("FGD2", "CDKN1A", "RHOD", "NGF", "AGTR1", "PREX1", "CDK2", "RGS19", "GRB2", "AIF1", "ARHGDIB", "EPS8", "MAP2K1", "TRIO", "GNA13", "RHOB", "ITSN1", "MAPK13", "RHOF", "OCRL", "ARHGAP4", "MAPKAPK3", "ARHGAP9", "CFL1", "TIAM1", "RAC2", "ARHGDIA", "FGD3", "ECT2", "G3BP1", "RAB38", "RAP2C", "ARHGAP11A", "STARD8", "INPP5B", "NRAS", "STARD13", "PHACTR4", "CDC42", "SHC1", "ARHGAP30", "MYO9B", "GNA12", "…
441	CYCLIN A:CDK2-ASSOCIATED EVENTS AT S PHASE ENTRY%REACTOME%REACT_9029.2	2.86451e-08	2.14481e-07	0.733762	0.547458	2.71717	39	c("MYC", "CDKN1A", "CDK2", "PSME2", "PSMD8", "PSMB8", "PSMA4", "PSME1", "PSMA6", "PSMB6", "PSMD14", "PSMA3", "CDC25B", "PSMD2", "PSMA5", "PSMD12", "PSMD13", "PSME3", "PSMB3", "PSMB5", "UBA52", "MAX", "PSMC3", "PSMB9", "PSMB1", "PSMA7", "PSMD9", "CKS1B", "PSMC4", "PSMD3", "CCNE1", "PSMC5")
442	MYD88 DEPENDENT CASCADE INITIATED ON ENDOSOME%REACTOME%REACT_25222.2	2.93752e-08	2.18462e-07	0.733762	0.496583	2.6653	52	c("IL6R", "IRAK1", "NOD2", "TLR8", "RPS6KA2", "JAK1", "MAP2K1", "S100A12", "RIPK2", "PPP2CB", "NFKBIA", "NFKBIB", "RPS6KA1", "MAPKAPK3", "IRAK4", "MYD88", "MAP2K4", "NFKB1", "ELK1", "DUSP7", "CHUK", "MAP2K3", "JUN", "PELI1", "RELA", "FOS", "MAP2K2", "IL6", "ECSIT", "MAPK7", "UBA52", "IRAK2", "MAPK9", "NFKB2", "TMEM189-UBE2V1", "MAPKAPK2", "MAPK14", "IKBKB", "CREB1", "IRF7", "IKBKG")
443	TOLL LIKE RECEPTOR 7 8 (TLR7 8) CASCADE%REACTOME%REACT_9020.4	2.93752e-08	2.18462e-07	0.733762	0.496583	2.6653	52	c("IL6R", "IRAK1", "NOD2", "TLR8", "RPS6KA2", "JAK1", "MAP2K1", "S100A12", "RIPK2", "PPP2CB", "NFKBIA", "NFKBIB", "RPS6KA1", "MAPKAPK3", "IRAK4", "MYD88", "MAP2K4", "NFKB1", "ELK1", "DUSP7", "CHUK", "MAP2K3", "JUN", "PELI1", "RELA", "FOS", "MAP2K2", "IL6", "ECSIT", "MAPK7", "UBA52", "IRAK2", "MAPK9", "NFKB2", "TMEM189-UBE2V1", "MAPKAPK2", "MAPK14", "IKBKB", "CREB1", "IRF7", "IKBKG")
444	TOLL LIKE RECEPTOR 9 (TLR9) CASCADE%REACTOME%REACT_9047.5	2.93752e-08	2.18462e-07	0.733762	0.496583	2.6653	52	c("IL6R", "IRAK1", "NOD2", "TLR8", "RPS6KA2", "JAK1", "MAP2K1", "S100A12", "RIPK2", "PPP2CB", "NFKBIA", "NFKBIB", "RPS6KA1", "MAPKAPK3", "IRAK4", "MYD88", "MAP2K4", "NFKB1", "ELK1", "DUSP7", "CHUK", "MAP2K3", "JUN", "PELI1", "RELA", "FOS", "MAP2K2", "IL6", "ECSIT", "MAPK7", "UBA52", "IRAK2", "MAPK9", "NFKB2", "TMEM189-UBE2V1", "MAPKAPK2", "MAPK14", "IKBKB", "CREB1", "IRF7", "IKBKG")
445	INTERPHASE OF MITOTIC CELL CYCLE%GO%GO:0051329	2.98072e-08	2.21176e-07	0.719513	0.400299	2.42405	96	c("BLM", "EIF4EBP1", "BCAT1", "CDKN1A", "E2F5", "CDK2", "PSME2", "KPNA2", "PSMD8", "CDK6", "PSMB8", "CDC7", "POLA2", "PSME4", "E2F4", "PSMA4", "PSME1", "PSMA6", "LSM10", "PSMB6", "PPP6C", "ACVR1B", "PSMD14", "PSMA3", "GSPT1", "PSMD2", "E2F3", "CDKN2D", "MCM8", "PSMA5", "CDKN1C", "PSMD12", "FBXO5", "PSMD13", "PSME3", "PSMB3", "CDT1", "POLD4", "ABL1", "POLE2", "MCM10", "PSMB5", "UBA52", "LRWD1", "T…
446	ORGANIC ANION TRANSPORT%GO%GO:0015711	3.02127e-08	2.23407e-07	0.719513	0.38114	2.37801	115	c("SLCO4A1", "SLC1A5", "CA14", "PDPN", "SLC11A1", "PPARG", "SLC38A1", "SLC36A4", "SLC1A3", "SLC36A1", "AQP9", "SLC38A2", "SLC4A7", "SLC7A8", "SLC6A6", "SLC4A3", "FOLR2", "SLCO2A1", "ABCC3", "FABP6", "SLCO2B1", "SLC7A1", "ACACB", "SLC25A13", "AKR1C3", "SLCO3A1", "PNPLA8", "SLC1A1", "SLC36A2", "SLC3A2", "SLC25A15", "SLC7A7", "SLC25A26", "SLC7A5", "SH3BP4", "SLC38A5", "SLC16A3", "SLC7A2", "SLC22A5",…
447	DOWNSTREAM SIGNALING EVENTS OF B CELL RECEPTOR (BCR)%REACTOME%REACT_118638.4	3.02431e-08	2.23407e-07	0.719513	0.422001	2.49178	82	c("FGF7", "PDGFRA", "CDKN1A", "CD86", "PIK3R3", "PSME2", "PSMD8", "PSMB8", "MALT1", "PTEN", "BAD", "NFKBIA", "NFKBIB", "RPS6KB2", "PSME4", "PSMA4", "PSME1", "PSMA6", "PDGFRB", "PSMB6", "NFKB1", "PSMD14", "PSMA3", "NR4A1", "IRS2", "PSMD2", "NRAS", "CHUK", "PSMA5", "PSMD12", "RELA", "ERBB2", "FOXO3", "PSMD13", "PSME3", "KRAS", "PSMB3", "PSMB5", "UBA52", "KLB", "VAV1", "MAPKAP1", "PSMC3", "MDM2", "P…
448	PROTEIN CATABOLIC PROCESS%GO%GO:0030163	3.21527e-08	2.35497e-07	0.719513	0.345137	2.25659	157	c("NGLY1", "ADAMTS9", "RNF144B", "CDK2", "PSME2", "HECTD1", "PSMD8", "TPRKB", "UHRF1", "DNAJB9", "PSMB8", "DERL1", "AURKA", "UCHL3", "ENPEP", "UBE2D3", "LRSAM1", "PSME4", "SEC61B", "ITCH", "FBXO6", "PSMA4", "PSME1", "PSMA6", "RIPK1", "UBE3C", "HSP90B1", "TRIM13", "PSMB6", "UBE2J1", "PSMD14", "PSMA3", "TNFAIP1", "SIRT2", "ANAPC7", "RHBDD1", "PSMD2", "RNF6", "WFS1", "PSMA5", "PSMD12", "PPT1", "BIRC…
449	TRAF6 MEDIATED INDUCTION OF NFKB AND MAP KINASES UPON TLR7 8 OR 9 ACTIVATION%REACTOME%REACT_25024.2	3.22031e-08	2.35497e-07	0.719513	0.49406	2.62981	51	c("IL6R", "IRAK1", "NOD2", "TLR8", "RPS6KA2", "JAK1", "MAP2K1", "S100A12", "RIPK2", "PPP2CB", "NFKBIA", "NFKBIB", "RPS6KA1", "MAPKAPK3", "IRAK4", "MYD88", "MAP2K4", "NFKB1", "ELK1", "DUSP7", "CHUK", "MAP2K3", "JUN", "PELI1", "RELA", "FOS", "MAP2K2", "IL6", "ECSIT", "MAPK7", "UBA52", "IRAK2", "MAPK9", "NFKB2", "TMEM189-UBE2V1", "MAPKAPK2", "MAPK14", "IKBKB", "CREB1", "IKBKG")
450	MYD88 CASCADE INITIATED ON PLASMA MEMBRANE%REACTOME%REACT_27215.3	3.22365e-08	2.35497e-07	0.719513	0.503943	2.67022	50	c("IL6R", "IRAK1", "NOD2", "RPS6KA2", "JAK1", "MAP2K1", "S100A12", "RIPK2", "PPP2CB", "NFKBIA", "NFKBIB", "RPS6KA1", "MAPKAPK3", "IRAK4", "MYD88", "MAP2K4", "NFKB1", "ELK1", "DUSP7", "TLR5", "CHUK", "MAP2K3", "JUN", "PELI1", "RELA", "FOS", "MAP2K2", "IL6", "ECSIT", "MAPK7", "UBA52", "IRAK2", "MAPK9", "NFKB2", "TMEM189-UBE2V1", "MAPKAPK2", "MAPK14", "IKBKB", "CREB1", "IKBKG")
451	TOLL LIKE RECEPTOR 10 (TLR10) CASCADE%REACTOME%REACT_9027.5	3.22365e-08	2.35497e-07	0.719513	0.503943	2.67022	50	c("IL6R", "IRAK1", "NOD2", "RPS6KA2", "JAK1", "MAP2K1", "S100A12", "RIPK2", "PPP2CB", "NFKBIA", "NFKBIB", "RPS6KA1", "MAPKAPK3", "IRAK4", "MYD88", "MAP2K4", "NFKB1", "ELK1", "DUSP7", "TLR5", "CHUK", "MAP2K3", "JUN", "PELI1", "RELA", "FOS", "MAP2K2", "IL6", "ECSIT", "MAPK7", "UBA52", "IRAK2", "MAPK9", "NFKB2", "TMEM189-UBE2V1", "MAPKAPK2", "MAPK14", "IKBKB", "CREB1", "IKBKG")
452	TOLL LIKE RECEPTOR 5 (TLR5) CASCADE%REACTOME%REACT_9061.5	3.22365e-08	2.35497e-07	0.719513	0.503943	2.67022	50	c("IL6R", "IRAK1", "NOD2", "RPS6KA2", "JAK1", "MAP2K1", "S100A12", "RIPK2", "PPP2CB", "NFKBIA", "NFKBIB", "RPS6KA1", "MAPKAPK3", "IRAK4", "MYD88", "MAP2K4", "NFKB1", "ELK1", "DUSP7", "TLR5", "CHUK", "MAP2K3", "JUN", "PELI1", "RELA", "FOS", "MAP2K2", "IL6", "ECSIT", "MAPK7", "UBA52", "IRAK2", "MAPK9", "NFKB2", "TMEM189-UBE2V1", "MAPKAPK2", "MAPK14", "IKBKB", "CREB1", "IKBKG")
453	RESPONSE TO HORMONE STIMULUS%GO%GO:0009725	3.36873e-08	2.45553e-07	0.719513	0.340051	2.24806	167	c("BMP7", "NAMPT", "SOCS3", "FGF7", "EIF4EBP1", "CTSB", "PPARG", "STAT3", "HCLS1", "ADCY3", "TGFBR3", "ABCG1", "AKR1C2", "CCL21", "THBS1", "PRKAR2A", "SOCS1", "EIF4G1", "CTSS", "MYO5A", "IL10", "PDK4", "GRB2", "GNG12", "NKX3-1", "AKR1C3", "ATP6V1A", "RARA", "CITED4", "MAP2K1", "CAB39L", "ANXA1", "CAV1", "EEF2K", "PTGER2", "BAIAP2", "CTSH", "ATP6V0A2", "STRADB", "LYN", "NR1H3", "NOTCH1", "ADIPOR2"…
454	REGULATION OF CATABOLIC PROCESS%GO%GO:0009894	3.42096e-08	2.48811e-07	0.719513	0.317657	2.15571	213	c("MYH6", "CCL11", "FGD2", "NCKAP1L", "ABHD5", "NKD2", "PLSCR1", "MYL4", "HIF1A", "CCL21", "TIMP3", "PRKCD", "DAB2", "PREX1", "AXIN2", "TBC1D2", "RGS19", "BCL2L1", "IL10", "RGS10", "UHRF1", "MYL3", "RAP1GAP", "TIMP1", "WNT5A", "RGS1", "IRAK3", "PLXNB1", "ZFP36", "CST3", "MYBPC3", "ERRFI1", "CDC42EP2", "IFI16", "GPX1", "FBP1", "PTEN", "RGS2", "RANGAP1", "BAD", "ADAP2", "TNFRSF1B", "IQGAP1", "FURIN…
455	PROTEIN N-LINKED GLYCOSYLATION%GO%GO:0006487	3.74578e-08	2.71836e-07	0.719513	0.454995	2.56553	65	c("GFPT2", "ALG3", "UAP1", "RPN1", "MCFD2", "MAGT1", "EDEM2", "GNPNAT1", "B4GALT6", "MGAT4A", "PMM2", "RPN2", "ALG8", "MAN1A1", "ALG5", "SEC24D", "B4GALT3", "DDOST", "MAN2A2", "GMPPB", "MGAT1", "UBE2J1", "CALR", "PGM3", "B4GALT1", "GANAB", "DAD1", "LMAN1", "ST3GAL4", "B4GALT5", "MGAT2", "VCP", "STT3A", "DPAGT1", "MAN2A1", "EDEM3", "SEC23A", "SEC24A", "ALG2", "DOLPP1", "EDEM1", "RFT1", "ALG1", "AL…
456	Chagas disease (American trypanosomiasis)%KEGG%hsa05142	3.99922e-08	2.89593e-07	0.719513	0.454146	2.55611	64	c("CCL2", "C3", "TLR4", "C1QC", "TLR2", "IRAK1", "TGFBR2", "PIK3R3", "GNAO1", "SERPINE1", "C1QA", "C1QB", "TNFRSF1A", "IL10", "GNA15", "IFNGR1", "PPP2CB", "MAPK13", "PLCB2", "NFKBIA", "PIK3R5", "IRAK4", "MYD88", "MAP2K4", "NFKB1", "ADCY1", "CALR", "FADD", "TLR6", "CHUK", "JUN", "PPP2R2C", "RELA", "FOS", "GNAI2", "IL6", "MAPK9", "IL1B", "TICAM1", "CFLAR", "IFNGR2", "MAPK14", "BDKRB2", "IKBKB", "GN…
457	NEURON PROJECTION MORPHOGENESIS%GO%GO:0048812	4.09582e-08	2.95939e-07	0.719513	0.331068	2.19688	173	c("BMP7", "TYROBP", "CHL1", "ITGA5", "EPB41L3", "SDCBP", "ITGA2", "RTN4RL1", "ABLIM3", "RPS6KA2", "CLTC", "WNT5A", "GRB2", "ACTG1", "PLXNB1", "FES", "COL4A4", "NTN1", "CAP1", "FZD5", "MAP2K1", "STIP1", "TRIO", "COL5A1", "PTEN", "RHOB", "ITGB1", "COL6A3", "RAB8A", "MYL6", "KCNQ3", "MET", "BAIAP2", "ITGB3", "HSP90AA1", "RPS6KA1", "PARD3", "PAK2", "CFL1", "CSNK2A1", "AP2S1", "RAC2", "ALCAM", "TUBB3"…
458	G1 S TRANSITION%REACTOME%REACT_1783.2	4.28941e-08	3.09249e-07	0.719513	0.485183	2.62522	54	c("MYC", "CDKN1A", "CDK2", "PSME2", "PSMD8", "PSMB8", "CDC7", "POLA2", "PPP2CB", "PSMA4", "PSME1", "PSMA6", "PSMB6", "PSMD14", "PSMA3", "PSMD2", "MCM8", "PSMA5", "PSMD12", "FBXO5", "PSMD13", "PSME3", "PSMB3", "CDT1", "POLE2", "MCM10", "PSMB5", "UBA52", "MAX", "PSMC3", "PSMB9", "PSMB1", "PSMA7", "PSMD9", "CKS1B", "TFDP1", "PSMC4", "PSMD3", "CCNE1", "PSMC5")
459	ACTIN FILAMENT-BASED PROCESS%GO%GO:0030029	4.4177e-08	3.17805e-07	0.719513	0.350255	2.27968	150	c("MYH6", "FGF7", "FGD2", "DOCK2", "WAS", "PDGFRA", "NCKAP1L", "PARVB", "PLEK", "MYL4", "NEDD9", "SELE", "ALDOA", "MYO5A", "CXCL1", "PREX1", "SDCBP", "MYL3", "NF2", "AIF1", "CORO1C", "CORO1A", "PHACTR1", "FERMT2", "ARHGDIB", "ADD1", "EPB41L4B", "EPS8", "PAWR", "MYBPC3", "CDC42EP2", "PARVA", "MYL6", "ARPC5", "SSH2", "MYO1B", "ARPC4", "BAIAP2", "RHOF", "PDGFRB", "HSP90B1", "MYBPC1", "CFL1", "MTSS1"…
460	DNA REPLICATION PRE-INITIATION%REACTOME%REACT_734.3	4.67191e-08	3.34634e-07	0.719513	0.509561	2.65829	46	c("CDK2", "PSME2", "PSMD8", "PSMB8", "CDC7", "POLA2", "PSME4", "PSMA4", "PSME1", "PSMA6", "PSMB6", "PSMD14", "PSMA3", "PSMD2", "E2F3", "MCM8", "PSMA5", "PSMD12", "GMNN", "PSMD13", "PSME3", "PSMB3", "CDT1", "POLE2", "MCM10", "PSMB5", "UBA52", "PSMC3", "PSMB9", "PSMB1", "PSMA7", "PSMD9", "PSMC4", "PSMD3", "PSMC5", "MCM5", "E2F2")
461	M G1 TRANSITION%REACTOME%REACT_1725.3	4.67191e-08	3.34634e-07	0.719513	0.509561	2.65829	46	c("CDK2", "PSME2", "PSMD8", "PSMB8", "CDC7", "POLA2", "PSME4", "PSMA4", "PSME1", "PSMA6", "PSMB6", "PSMD14", "PSMA3", "PSMD2", "E2F3", "MCM8", "PSMA5", "PSMD12", "GMNN", "PSMD13", "PSME3", "PSMB3", "CDT1", "POLE2", "MCM10", "PSMB5", "UBA52", "PSMC3", "PSMB9", "PSMB1", "PSMA7", "PSMD9", "PSMC4", "PSMD3", "PSMC5", "MCM5", "E2F2")
462	GM-CSF%IOB%GM-CSF	4.85282e-08	3.4684e-07	0.719513	0.47189	2.57717	56	c("SLC2A1", "SYK", "STAT3", "TGFBR3", "BCL3", "CSF2RA", "RPS6KA2", "GRB2", "FES", "JAK1", "MAP2K1", "BAD", "YES1", "NFKBIA", "YWHAZ", "LYN", "HCK", "ELK1", "IRS2", "PFN1", "CHUK", "GANAB", "MAP2K3", "SHC1", "FOXO3", "PLA2G4A", "CCT5", "MAP2K2", "PTPN6", "MAPK7", "CRKL", "MAPK9", "RAF1", "NFKB2", "BCAR1", "VAV1", "STAT5A", "EPHB2", "MAPK14", "DPYSL2", "IKBKB", "CREB1", "PTPRC")
463	EXTRACELLULAR MATRIX ORGANIZATION%REACTOME%REACT_118779.4	4.92271e-08	3.51076e-07	0.719513	0.427035	2.51381	81	c("BMP7", "CTSB", "EFEMP1", "MFAP3", "P4HB", "ITGA5", "FBN2", "CTSS", "MMP2", "TIMP1", "SERPINH1", "FBLN1", "COL5A3", "LOX", "PLOD2", "COL4A4", "FBLN5", "LAMC2", "COL5A1", "CTSG", "ITGB1", "COL6A3", "FURIN", "TPSAB1", "ADAMTS3", "PPIB", "FBN1", "FN1", "ITGB3", "MMP19", "PCOLCE", "LAMB3", "MMP11", "MFAP5", "PLOD3", "COL25A1", "COL6A2", "TLL1", "COL1A1", "ITGB8", "MMP9", "COL18A1", "COL6A1", "BMP2"…
464	GOLGI MEMBRANE%GO%GO:0000139	4.9405e-08	3.51585e-07	0.719513	0.348972	2.27641	153	c("QSOX1", "CHST7", "CHPT1", "SLC9A7", "CHST9", "HLA-DRA", "TMED3", "CHSY1", "ST3GAL1", "B2M", "TNFRSF1A", "UNC93B1", "B4GALT6", "TLR8", "SGMS2", "HYAL2", "MGAT4A", "CABP1", "HS3ST2", "NCALD", "CD74", "HLA-DPA1", "MAN1A1", "GPR89B", "UST", "DSE", "FURIN", "ATF6", "UGCG", "CAV1", "B4GALT3", "AP1B1", "HLA-DRB4", "HLA-E", "GPR89A", "MAN2A2", "ICA1", "HLA-DPB1", "GCNT1", "MGAT1", "NOTCH1", "GALNT10",…
465	ENDOCYTOSIS%GO%GO:0006897	4.97536e-08	3.53304e-07	0.719513	0.403814	2.42749	92	c("APOB", "DOCK2", "TGM2", "SLC11A1", "LRP8", "SCARA5", "THBS1", "MSR1", "STAB1", "RAMP1", "MERTK", "AXL", "PICALM", "TYRO3", "CLTC", "GRB2", "AIF1", "CORO1C", "CLEC7A", "CORO1A", "ANXA3", "DNER", "CXCL16", "RARA", "PYCARD", "CD302", "ITSN1", "LRSAM1", "CAV1", "RAB34", "CD14", "MAPKAPK3", "RAB5A", "RAMP3", "NR1H3", "LRP1", "FCN1", "PACSIN2", "PPT1", "LILRB1", "IGF2R", "TOM1", "NECAP2", "HIP1R", "…
466	INTRACELLULAR PROTEIN KINASE CASCADE%GO%GO:0007243	4.99278e-08	3.5378e-07	0.719513	0.350974	2.30776	163	c("CCL2", "SOCS3", "FGF12", "TGFA", "WNK3", "MYC", "STAT3", "TLR4", "PLEK", "HMOX1", "TGFBR3", "TLR2", "MAP3K6", "IRAK1", "SOCS1", "NOD2", "DDX3X", "LY96", "WNK1", "STK17B", "BCL3", "TYRO3", "TLR8", "RPS6KA2", "WNT5A", "NKX3-1", "MAP2K1", "PRDX4", "RIPK2", "PTEN", "MAPK13", "DAXX", "MAPK4", "CD14", "OXSR1", "CLCF1", "RPS6KA1", "RIPK1", "CTSH", "MAPKAPK3", "DUSP12", "SRPK1", "MAP2K4", "LYN", "ELK1…
467	POSITIVE REGULATION OF T CELL ACTIVATION%GO%GO:0050870	5.32345e-08	3.76403e-07	0.719513	0.451385	2.54057	64	c("CCL2", "NCKAP1L", "MAP3K8", "CD86", "CCL21", "TGFBR2", "PIK3R3", "NOD2", "HLA-DRA", "EBI3", "CD276", "CD4", "GRB2", "AIF1", "LILRB2", "HLA-DPA1", "RARA", "MALT1", "PYCARD", "YES1", "CAV1", "HLA-DRB4", "CD274", "PAK2", "HLA-DPB1", "LYN", "IL6ST", "CSK", "IGFBP2", "TNFRSF14", "CDC42", "LILRB1", "IL6", "PTPN6", "HLA-DRB3", "IL18", "VAV1", "IL1B", "MAPKAP1", "TNFSF4", "PRKCQ", "PDCD1LG2", "RAC1", …
468	CARBOXYLIC ACID BIOSYNTHETIC PROCESS%GO%GO:0046394	5.43875e-08	3.82769e-07	0.719513	0.419047	2.49134	84	c("PTDSS1", "GGT5", "PLSCR1", "ALOX5", "GPT2", "EDN1", "GLUL", "SHMT1", "ALOX5AP", "PTGIS", "ASNS", "CSPG4", "CNDP2", "GCLM", "UGP2", "EIF5A", "ELOVL5", "PSAT1", "CD74", "GPT", "PNPLA8", "UST", "DSE", "NDUFAB1", "PTGS1", "PHGDH", "DCN", "GGCT", "KYNU", "PTGDS", "EDN2", "DEGS1", "EIF2B4", "DHRS9", "FADS3", "GSS", "NANP", "UGDH", "PTGS2", "ELOVL1", "PYCR1", "MIF", "PTGES", "DOHH", "CCBL1", "VCAN", …
469	ORGANIC ACID BIOSYNTHETIC PROCESS%GO%GO:0016053	5.43875e-08	3.82769e-07	0.719513	0.419047	2.49134	84	c("PTDSS1", "GGT5", "PLSCR1", "ALOX5", "GPT2", "EDN1", "GLUL", "SHMT1", "ALOX5AP", "PTGIS", "ASNS", "CSPG4", "CNDP2", "GCLM", "UGP2", "EIF5A", "ELOVL5", "PSAT1", "CD74", "GPT", "PNPLA8", "UST", "DSE", "NDUFAB1", "PTGS1", "PHGDH", "DCN", "GGCT", "KYNU", "PTGDS", "EDN2", "DEGS1", "EIF2B4", "DHRS9", "FADS3", "GSS", "NANP", "UGDH", "PTGS2", "ELOVL1", "PYCR1", "MIF", "PTGES", "DOHH", "CCBL1", "VCAN", …
470	CELLULAR RESPONSE TO TOPOLOGICALLY INCORRECT PROTEIN%GO%GO:0035967	5.44826e-08	3.82769e-07	0.719513	0.467438	2.57421	58	c("CCL2", "ATF3", "TSPYL2", "ATF4", "ASNS", "SRPRB", "XBP1", "DNAJB9", "ADD1", "DERL1", "LMNA", "HDGF", "ATF6", "DNAJC3", "HSP90B1", "SSR1", "KLHDC3", "SERP1", "PTPN1", "CALR", "RHBDD1", "WFS1", "SHC1", "FKBP14", "PDIA6", "ACADVL", "CXXC1", "VCP", "EIF2S1", "DERL2", "HERPUD1", "HYOU1", "EDEM1", "RNF5", "HSPA5", "YIF1A", "AMFR", "ATP6V0D1", "DNAJB11", "CREB3", "PDIA5", "ZBTB17", "PREB", "GOSR2", "…
471	Measles%KEGG%hsa05162	5.46073e-08	3.82831e-07	0.719513	0.430926	2.52611	78	c("CD209", "STAT3", "TLR4", "HSPA6", "TLR2", "IRAK1", "PIK3R3", "CDK2", "TNFRSF10A", "CDK6", "HSPA1B", "CBLB", "IFNGR1", "FCGR2B", "JAK1", "IL2RA", "NFKBIA", "NFKBIB", "PIK3R5", "IRAK4", "MYD88", "CSNK2A1", "CCND3", "NFKB1", "RAB9A", "DOK1", "CHUK", "RELA", "TNFRSF10D", "IL6", "OAS1", "STAT2", "IL2RG", "IFNAR2", "EIF2S1", "HSPA8", "ADAR", "MSN", "IL1B", "STAT5A", "HSPA1A", "MX1", "TNFRSF10B", "EI…
472	CARBOHYDRATE DERIVATIVE CATABOLIC PROCESS%GO%GO:1901136	5.52214e-08	3.86316e-07	0.719513	0.346083	2.24596	148	c("MYH6", "BLM", "NGLY1", "ADAMTS9", "LYVE1", "PDE4D", "APOBEC2", "RHOD", "ADA", "GNL3", "DDX3X", "GLA", "EIF5", "CD44", "RAB8B", "CSPG4", "NPL", "RAP1GAP", "HYAL2", "ACLY", "EFTUD2", "DPYD", "PDE2A", "ABCD3", "RHOB", "SLC9A1", "ATL3", "GNL2", "NCF1", "MSH6", "HSP90AA1", "RHOF", "DCN", "RAB5A", "HINT1", "NAGA", "ATL2", "RAB9A", "NAGLU", "RAB38", "GSPT1", "RAB4B", "GNS", "GPC4", "PICK1", "GM2A", "…
473	INFLAMMATORY RESPONSE%GO%GO:0006954	5.54436e-08	3.8705e-07	0.719513	0.379962	2.37309	116	c("CCL2", "CCL11", "SERPINA3", "S100A9", "SYK", "SLC11A1", "PTX3", "S100A8", "CCR1", "CSF1R", "HMOX1", "PLSCR1", "AOX1", "CYBB", "C3AR1", "HIF1A", "IL6R", "CYBA", "CCL21", "THBS1", "SELE", "TNFRSF1A", "LYZ", "TNFAIP6", "IL10", "SIGLEC1", "ITGB2", "AIF1", "RIPK2", "ANXA1", "ITCH", "NFKB1", "IL18RAP", "NMI", "NLRP3", "GPR68", "ELF3", "CXCL6", "ADORA3", "AOAH", "CHUK", "RELA", "SIGIRR", "APOL3", "FO…
474	PEPTIDYL-ASPARAGINE MODIFICATION%GO%GO:0018196	5.6958e-08	3.95948e-07	0.719513	0.45066	2.53649	64	c("GFPT2", "ALG3", "UAP1", "RPN1", "MCFD2", "EDEM2", "GNPNAT1", "B4GALT6", "MGAT4A", "PMM2", "RPN2", "ALG8", "MAN1A1", "ALG5", "SEC24D", "B4GALT3", "DDOST", "MAN2A2", "GMPPB", "MGAT1", "UBE2J1", "CALR", "PGM3", "B4GALT1", "GANAB", "DAD1", "LMAN1", "ST3GAL4", "B4GALT5", "MGAT2", "VCP", "STT3A", "DPAGT1", "MAN2A1", "EDEM3", "SEC23A", "SEC24A", "ALG2", "DOLPP1", "EDEM1", "RFT1", "ALG1", "ALG9", "ALG…
475	PROTEIN N-LINKED GLYCOSYLATION VIA ASPARAGINE%GO%GO:0018279	5.6958e-08	3.95948e-07	0.719513	0.45066	2.53649	64	c("GFPT2", "ALG3", "UAP1", "RPN1", "MCFD2", "EDEM2", "GNPNAT1", "B4GALT6", "MGAT4A", "PMM2", "RPN2", "ALG8", "MAN1A1", "ALG5", "SEC24D", "B4GALT3", "DDOST", "MAN2A2", "GMPPB", "MGAT1", "UBE2J1", "CALR", "PGM3", "B4GALT1", "GANAB", "DAD1", "LMAN1", "ST3GAL4", "B4GALT5", "MGAT2", "VCP", "STT3A", "DPAGT1", "MAN2A1", "EDEM3", "SEC23A", "SEC24A", "ALG2", "DOLPP1", "EDEM1", "RFT1", "ALG1", "ALG9", "ALG…
476	CELL CYCLE%REACTOME%REACT_115566.3	5.82018e-08	4.03745e-07	0.719513	0.309748	2.11091	217	c("MYC", "CDKN1A", "PCNT", "RPS27", "E2F5", "TUBG1", "PPP2R5A", "CDK2", "PSME2", "PSMD8", "TUBB", "CDK6", "PPP1CC", "RAD9B", "PSMB8", "AURKA", "CDC7", "POLA2", "PPP2CB", "CLIP1", "AHCTF1", "RANGAP1", "SPC24", "RAB8A", "NEK6", "PSME4", "E2F4", "KIF20A", "TUBA1A", "PSMA4", "HSP90AA1", "PSME1", "PSMA6", "LMNB1", "H2AFZ", "CSNK2A1", "PSMB6", "KIF2A", "CCND3", "CENPE", "TINF2", "PSMD14", "PSMA3", "TUB…
477	POSITIVE REGULATION OF SEQUENCE-SPECIFIC DNA BINDING TRANSCRIPTION FACTOR ACTIVITY%GO%GO:0051091	6.17177e-08	4.27237e-07	0.704976	0.409053	2.43442	85	c("S100A9", "S100A8", "ABRA", "PPARG", "LRP8", "TLR4", "TLR2", "BTK", "IL6R", "IRAK1", "NOD2", "IL10", "SPHK1", "WNT5A", "IRAK3", "ANXA3", "HIPK2", "MALT1", "PYCARD", "S100A12", "RIPK2", "PTEN", "NFKBIA", "CEBPG", "NFKBIB", "TRIM5", "SMARCA4", "PSMA6", "RIPK1", "CAMK1D", "RIPK3", "NFKB1", "NLRP3", "PRKCH", "AGT", "CHUK", "PRKCI", "RELA", "MTDH", "IL6", "NLRC4", "UBA52", "IRAK2", "RBCK1", "NFKB2",…
478	M-CSF%IOB%M-CSF	6.19746e-08	4.28118e-07	0.704976	0.512582	2.64612	45	c("EIF4EBP1", "STAT3", "CSF1R", "TFE3", "SKAP2", "PRKCD", "LILRB3", "GRB2", "JAK1", "MAP2K1", "PSTPIP2", "RPS6KB2", "CSF1", "ITGB3", "RIPK1", "PAK2", "LYN", "RPS6", "INPP5D", "FADD", "ETS2", "VIM", "SHC1", "MAP2K2", "PTPN6", "SOS1", "PTPN2", "RAF1", "INPPL1", "BCAR1", "THOC5", "STAT5A", "PRKCE")
479	TOLL-LIKE RECEPTOR 3 SIGNALING PATHWAY%GO%GO:0034138	6.35705e-08	4.38225e-07	0.704976	0.489713	2.59516	49	c("TLR4", "IRAK1", "NOD2", "LY96", "UNC93B1", "RPS6KA2", "MAP2K1", "RIPK2", "NFKBIA", "NFKBIB", "CD14", "RPS6KA1", "RIPK1", "MAPKAPK3", "MAP2K4", "NFKB1", "ELK1", "DUSP7", "TICAM2", "TNIP2", "CHUK", "MAP2K3", "JUN", "RELA", "FOS", "MAP2K2", "MAPK7", "UBA52", "IRAK2", "MAPK9", "NFKB2", "TICAM1", "MAPKAPK2", "MAPK14", "IKBKB", "CREB1", "IRF7", "IKBKG", "IKBKE", "MAPK3")
480	ERBB1 DOWNSTREAM SIGNALING%PATHWAY INTERACTION DATABASE NCI-NATURE CURATED DATA%ERBB1 DOWNSTREAM SIGNALING	6.42799e-08	4.42192e-07	0.704976	0.440149	2.51378	68	c("STAT3", "PRKCD", "DUSP1", "BCL2L1", "GRB2", "ZFP36", "EPS8", "MAP2K1", "ARPC1B", "BAD", "ARPC3", "SLC9A1", "IQGAP1", "YWHAH", "ARPC5", "ACTR2", "ARPC4", "BAIAP2", "ACTR3", "YWHAZ", "RAB5A", "MAP2K4", "ELK1", "RPS6", "NCKAP1", "NRAS", "ARPC2", "JUN", "CDC42", "FOS", "CALM2", "MAP2K2", "YWHAB", "MAPK7", "SOS1", "KRAS", "MAPK9", "RAF1", "EGR1", "RALGDS", "RALA", "MAPKAP1", "CALM3", "CAPN2", "ARF4…
481	G1/S TRANSITION OF MITOTIC CELL CYCLE%GO%GO:0000082	6.64048e-08	4.5586e-07	0.704976	0.439884	2.51227	68	c("EIF4EBP1", "BCAT1", "CDKN1A", "CDK2", "PSME2", "PSMD8", "CDK6", "PSMB8", "CDC7", "POLA2", "PSMA4", "PSME1", "PSMA6", "PSMB6", "PPP6C", "ACVR1B", "PSMD14", "PSMA3", "GSPT1", "PSMD2", "CDKN2D", "MCM8", "PSMA5", "PSMD12", "FBXO5", "PSMD13", "PSME3", "PSMB3", "CDT1", "POLE2", "MCM10", "PSMB5", "UBA52", "PSMC3", "CDC34", "PSMB9", "PSMB1", "PSMA7", "PSMD9", "CDK10", "CKS1B", "TFDP1", "PSMC4", "PSMD3…
482	MEMBRANE TRAFFICKING%REACTOME%REACT_11123.4	6.69254e-08	4.5848e-07	0.704976	0.398369	2.42896	98	c("TFRC", "VAMP8", "DAB2", "MYO5A", "CPD", "PICALM", "CLTC", "ASPSCR1", "GJA4", "FTL", "YIPF6", "RAB8A", "YWHAH", "SEC24D", "CTSZ", "TXNDC5", "AP1B1", "OCRL", "YWHAZ", "GNS", "PRKAG1", "AP1G1", "BLOC1S1", "VPS37B", "COPB2", "CALM2", "IGF2R", "TGOLN2", "GAK", "HIP1R", "CHMP7", "M6PR", "SNF8", "DNM2", "CLTA", "YWHAB", "COPZ1", "RAB5C", "RAB11A", "CLTB", "HSPA8", "SEC23A", "SEC24A", "AP3B1", "COPE",…
483	CELL SURFACE INTERACTIONS AT THE VASCULAR WALL%REACTOME%REACT_12051.1	6.74285e-08	4.60971e-07	0.704976	0.473137	2.59378	57	c("GRB14", "APOB", "ATP1B3", "ATP1B1", "FCER1G", "CD58", "SLC7A8", "ITGAM", "ITGA5", "MERTK", "ITGB2", "ITGA3", "ANGPT2", "TEK", "DOK2", "ITGB1", "SLC3A2", "YES1", "CAV1", "FN1", "SLC7A7", "ITGB3", "SLC7A5", "SLC16A3", "LYN", "ANGPT1", "INPP5D", "NRAS", "PPIA", "TREM1", "SHC1", "THBD", "PTPN6", "SOS1", "KRAS", "SELL")
484	RESPONSE TO INTERFERON-GAMMA%GO%GO:0034341	7.06546e-08	4.82028e-07	0.704976	0.452491	2.59375	69	c("CCL2", "SOCS3", "IFI30", "SLC11A1", "IRF8", "AQP4", "IFITM2", "PRKCD", "SOCS1", "HLA-DRA", "CALCOCO2", "CD44", "IRF1", "B2M", "WNT5A", "AIF1", "IFNGR1", "MT2A", "IFITM1", "GBP1", "CXCL16", "HLA-DPA1", "JAK1", "IFITM3", "GBP2", "HLA-DRB4", "HLA-E", "HLA-DPB1", "KYNU", "HCK", "IRF5", "PTPN1", "HLA-A", "RPL13A", "HLA-B", "FCGR1A", "OAS1", "BST2", "GCH1", "FCGR1B", "PTPN6", "PTPN2", "HLA-DRB3")
485	NUCLEOTIDE METABOLIC PROCESS%GO%GO:0009117	7.18343e-08	4.89066e-07	0.704976	0.327514	2.19311	188	c("MYH6", "NAMPT", "GFPT2", "BLM", "NUDT4", "PDE4D", "UAP1", "RHOD", "ADA", "G6PD", "TKT", "GNL3", "ALDOA", "DDX3X", "PAPSS2", "EIF5", "IDH1", "TK1", "GNPNAT1", "RAB8B", "RAP1GAP", "SLC25A13", "UGP2", "PGD", "ACLY", "PMM2", "EFTUD2", "PGLS", "GPX1", "PDE2A", "ABCD3", "RHOB", "BAD", "ATL3", "GNL2", "NCF1", "MSH6", "PPAT", "HSP90AA1", "RHOF", "NUDT5", "NADK", "RAB5A", "QPRT", "HINT1", "GMPPB", "ADS…
486	REGULATION OF CELL GROWTH%GO%GO:0001558	7.31021e-08	4.96673e-07	0.704976	0.390006	2.38842	100	c("S100A9", "SPOCK1", "TSPYL2", "CHPT1", "ENO1", "S100A8", "BCL6", "CDKN1A", "ACVRL1", "FAM107A", "DCUN1D3", "DDX3X", "AGTR1", "IL17RB", "HSPA1B", "SPHK1", "HYAL2", "FGFRL1", "CD320", "CXCL16", "EXOSC4", "FBP1", "OSGIN1", "ITCH", "SMARCA4", "BTG1", "RPS6KA1", "SH3BP4", "CSNK2A1", "ACVR1B", "CRLF3", "EI24", "BLZF1", "AGT", "RNF6", "SLIT3", "MORF4L2", "CDKN2D", "SIPA1", "MAD2L2", "MSX1", "PPT1", "E…
487	ENZYME INHIBITOR ACTIVITY%GO%GO:0004857	7.43028e-08	5.03794e-07	0.704976	0.377769	2.32779	105	c("SOCS3", "SERPINA3", "PPP1R1A", "SPOCK1", "TIMP4", "ANGPTL4", "TNFAIP8", "TFPI", "SERPINA1", "TIMP3", "SOCS1", "TESC", "SERPINE1", "TIMP1", "SERPINH1", "CAST", "HYAL2", "SERPINB1", "CABP1", "CST3", "ANXA5", "GPX1", "GMFG", "SERPINB8", "SERPING1", "IQGAP1", "FURIN", "DNAJC3", "ANXA1", "GMFB", "IPO5", "ABCE1", "RPS6KA1", "NOTCH1", "SPINK1", "SERPINB6", "AGT", "CDKN2D", "APBA3", "SLN", "SERPINA5",…
488	REGULATION OF SECRETION%GO%GO:0051046	7.73093e-08	5.23105e-07	0.704976	0.364186	2.31407	126	c("CORIN", "SLC2A1", "SYK", "SRGN", "CSF1R", "RHBDF2", "EDN1", "PRKAR2A", "STXBP2", "NOD2", "AGTR1", "FGR", "IL10", "SPCS3", "WNT5A", "HYAL2", "FES", "NKX3-1", "CD74", "SOX11", "SYTL4", "PYCARD", "BAD", "SEC11C", "IQGAP1", "SPCS2", "DPH3", "ITPR3", "CD274", "EXPH5", "RAB5A", "RAPGEF3", "LYN", "NR1H3", "DNAJC1", "RAB27A", "RAB9A", "RAP1B", "NLRP3", "IRS2", "ACSL3", "RHBDD1", "AGT", "SEC11A", "PPIA…
489	ENDOPLASMIC RETICULUM UNFOLDED PROTEIN RESPONSE%GO%GO:0030968	7.76167e-08	5.24111e-07	0.704976	0.476311	2.58112	55	c("CCL2", "ATF3", "TSPYL2", "ATF4", "ASNS", "SRPRB", "XBP1", "DNAJB9", "ADD1", "DERL1", "LMNA", "HDGF", "ATF6", "DNAJC3", "HSP90B1", "SSR1", "KLHDC3", "SERP1", "PTPN1", "CALR", "WFS1", "SHC1", "FKBP14", "PDIA6", "ACADVL", "CXXC1", "VCP", "EIF2S1", "DERL2", "HERPUD1", "HYOU1", "EDEM1", "HSPA5", "YIF1A", "AMFR", "ATP6V0D1", "DNAJB11", "CREB3", "PDIA5", "ZBTB17", "PREB", "GOSR2", "PLA2G4B", "C19ORF1…
490	GLYCOPROTEIN METABOLIC PROCESS%GO%GO:0009100	7.83611e-08	5.28058e-07	0.704976	0.361613	2.32026	135	c("GFPT2", "NGLY1", "CHST7", "ADAMTS9", "ALG3", "CHST9", "UAP1", "HIF1A", "RPN1", "MCFD2", "MAGT1", "CHSY1", "ST3GAL1", "EDEM2", "GNPNAT1", "B4GALT6", "CSPG4", "MGAT4A", "PMM2", "RPN2", "ALG8", "MAN1A1", "UST", "DSE", "ALG5", "SEC24D", "ART4", "NPC1", "B4GALT3", "DDOST", "CANT1", "MAN2A2", "DCN", "GCNT1", "GMPPB", "MGAT1", "ST6GALNAC3", "UBE2J1", "GALNT10", "CALR", "PGM3", "GALNT1", "CHST3", "B4G…
491	PERINUCLEAR REGION OF CYTOPLASM%GO%GO:0048471	7.94926e-08	5.34592e-07	0.704976	0.37344	2.36212	123	c("TGFA", "CTSB", "MT1X", "TLR4", "SELE", "DCUN1D3", "CALCOCO2", "CLIC4", "MVP", "PICALM", "HSPA1B", "NDFIP2", "SLC11A2", "NF2", "AIF1", "HYAL2", "MT2A", "WWC1", "AURKA", "OSBPL3", "LMNA", "TPPP", "S100A4", "PDE2A", "APEX1", "CAV1", "MT1M", "MT1G", "NPC1", "CLIC1", "CSF1", "CAV2", "LIMS1", "HSP90B1", "TRIM13", "LYN", "CALR", "ECE1", "MT1A", "GALNT1", "ACSL3", "PICK1", "APBA3", "NANOS1", "MT1E", "…
492	SLC-MEDIATED TRANSMEMBRANE TRANSPORT%REACTOME%REACT_19118.1	8.04648e-08	5.4003e-07	0.704976	0.359108	2.28969	129	c("HK2", "SLCO4A1", "SLC2A1", "SLC2A3", "SLC1A5", "HK3", "SLC5A1", "SLC11A1", "SLC9A7", "SLC38A1", "SLC9A9", "SLC1A3", "SLC36A1", "SLC44A3", "SLC38A2", "SLC4A7", "SLC7A8", "SLC39A8", "SLC6A6", "SLC4A3", "SLC29A2", "SLC2A5", "SLCO2A1", "SLC39A14", "SLC31A1", "SLCO2B1", "SLC7A1", "SLC11A2", "SLC1A1", "SLC36A2", "SLC30A3", "SLC3A2", "SLC15A3", "SLC9A1", "SLC2A13", "SLC39A1", "NUP205", "SLC5A6", "SLC…
493	INTERPHASE%GO%GO:0051325	8.07886e-08	5.41103e-07	0.704976	0.393827	2.39523	97	c("BLM", "EIF4EBP1", "BCAT1", "CDKN1A", "E2F5", "CDK2", "PSME2", "KPNA2", "PSMD8", "CDK6", "PSMB8", "CDC7", "POLA2", "PSME4", "E2F4", "PSMA4", "PSME1", "PSMA6", "LSM10", "PSMB6", "PPP6C", "ACVR1B", "PSMD14", "PSMA3", "GSPT1", "PSMD2", "E2F3", "CDKN2D", "MCM8", "PSMA5", "CDKN1C", "PSMD12", "FBXO5", "PSMD13", "PSME3", "PSMB3", "CDT1", "POLD4", "ABL1", "POLE2", "MCM10", "PSMB5", "UBA52", "LRWD1", "T…
494	BCR SIGNALING PATHWAY%PATHWAY INTERACTION DATABASE NCI-NATURE CURATED DATA%BCR SIGNALING PATHWAY	8.14629e-08	5.43773e-07	0.704976	0.512119	2.63056	44	c("SYK", "PPP3CC", "BTK", "GRB2", "FCGR2B", "MALT1", "MAP2K1", "PTEN", "NFKBIA", "NFKBIB", "DAPP1", "CSNK2A1", "LYN", "NFKB1", "ELK1", "CSK", "POU2F2", "DOK1", "CHUK", "JUN", "RELA", "FOS", "SHC1", "CALM2", "PTPN6", "SOS1", "RAF1", "CALM3", "MAPK14", "RAC1", "IKBKB", "PPP3CA", "PTPRC", "IKBKG", "MAP4K1", "ETS1", "BLNK", "MAPK3")
495	SECRETION BY CELL%GO%GO:0032940	8.15166e-08	5.43773e-07	0.704976	0.361421	2.30077	127	c("FGF7", "CFD", "F13A1", "SYK", "F5", "SRGN", "CCR1", "F8", "PLEK", "EDN1", "SERPINA1", "SLC38A2", "THBS1", "STXBP2", "ALDOA", "PDIA4", "SERPINE1", "WDR1", "STEAP3", "TYRO3", "TIMP1", "ANXA3", "PSAP", "CD63", "CAP1", "S100A12", "SERPING1", "RAB8A", "FURIN", "CCL8", "VWF", "FN1", "STX12", "ITGB3", "CFL1", "LYN", "HCK", "RAB27A", "TUBA4A", "GAL", "CALU", "PFN1", "STX2", "PPIA", "MIA3", "LILRB1", "…
496	M PHASE%REACTOME%REACT_910.3	8.39567e-08	5.58921e-07	0.704976	0.375661	2.32938	110	c("RPS27", "PPP2R5A", "PSME2", "PSMD8", "PPP1CC", "PSMB8", "PPP2CB", "CLIP1", "AHCTF1", "RANGAP1", "SPC24", "NEK6", "PSME4", "KIF20A", "PSMA4", "PSME1", "PSMA6", "LMNB1", "CSNK2A1", "PSMB6", "KIF2A", "CENPE", "PSMD14", "PSMA3", "NDEL1", "ANAPC7", "BLZF1", "PSMD2", "B9D2", "PSMA5", "PSMD12", "FBXO5", "NUDC", "PSMD13", "NEK9", "GORASP2", "ZW10", "ANAPC5", "PSME3", "NCAPG", "BIRC5", "PTTG1", "CENPO"…
497	TGF_BETA_RECEPTOR%IOB%TGF_BETA_RECEPTOR	8.71248e-08	5.78846e-07	0.704976	0.39337	2.39245	97	c("ATF3", "MYC", "CDKN1A", "ACVRL1", "TGFBR3", "TGIF1", "PRKAR2A", "TGFBR2", "PRKCD", "E2F5", "DAB2", "AXIN2", "CD44", "NME1", "CDK2", "CDK6", "GRB2", "UBE2D3", "CAV1", "E2F4", "DAXX", "ITCH", "PARD3", "STRAP", "SNX6", "ANAPC7", "EIF3I", "MAP2K3", "JUN", "SKI", "ING2", "FOS", "KPNB1", "SHC1", "FOXO3", "ENG", "NCOA1", "FOSB", "RHOA", "ANAPC5", "HSPA8", "SOS1", "SPARC", "RAF1", "DCP1A", "BCAR1", "J…
498	TOLL-LIKE RECEPTOR 1 SIGNALING PATHWAY%GO%GO:0034130	8.99295e-08	5.96279e-07	0.704976	0.51203	2.68191	47	c("TLR4", "TLR2", "BTK", "IRAK1", "NOD2", "LY96", "RPS6KA2", "MAP2K1", "RIPK2", "NFKBIA", "NFKBIB", "RPS6KA1", "MAPKAPK3", "IRAK4", "MYD88", "MAP2K4", "NFKB1", "ELK1", "DUSP7", "TLR6", "CHUK", "MAP2K3", "JUN", "PELI1", "RELA", "FOS", "MAP2K2", "MAPK7", "UBA52", "IRAK2", "MAPK9", "NFKB2", "TMEM189-UBE2V1", "MAPKAPK2", "MAPK14", "IKBKB", "CREB1", "IKBKG")
499	RNA CATABOLIC PROCESS%GO%GO:0006401	9.42328e-08	6.22938e-07	0.704976	0.359224	2.29925	133	c("RNASE6", "ISG20", "RPS27", "EIF4G1", "HSPA1B", "EIF4A1", "RPLP0", "RPS19", "ZFP36", "RNASE2", "EXOSC4", "RPL34", "TNKS1BP1", "RPL27A", "RPS5", "RPL29", "RPL18", "RPS18", "RPL24", "RPL13", "ETF1", "RPS17", "RPS3", "RPL35", "RPS15A", "RPS2", "LSM6", "MAGOH", "ABCE1", "RPS28", "RPSA", "RPL41", "RPLP2", "RPL18A", "RPS10", "RPL12", "RPS9", "RPL36A", "RPS6", "RPL21", "RNASET2", "RPL28", "RPL26", "RP…
500	RESPONSE TO PEPTIDE%GO%GO:1901652	9.43274e-08	6.22938e-07	0.704976	0.378666	2.332	103	c("NAMPT", "SOCS3", "FGF7", "EIF4EBP1", "PPARG", "STAT3", "ADCY3", "PRKAR2A", "SOCS1", "NOD2", "EIF4G1", "MYO5A", "PDK4", "GRB2", "GNG12", "ATP6V1A", "MAP2K1", "CAB39L", "EEF2K", "BAIAP2", "ATP6V0A2", "STRADB", "LYN", "IRF5", "ADCY1", "RPS6", "PTPN1", "ATP6V0A1", "ATP6V1F", "IRS2", "TCIRG1", "NRAS", "PRKAG1", "DOK1", "ATP6V0C", "PRKCI", "EIF2B4", "SHC1", "FOXO3", "ADIPOQ", "MAP2K2", "RHEB", "ADCY…
501	REGULATION OF EPITHELIAL CELL PROLIFERATION%GO%GO:0050678	9.4995e-08	6.26095e-07	0.704976	0.44593	2.53693	67	c("CCL11", "FGF7", "VASH2", "OSR1", "TGFA", "MYC", "ACVRL1", "TGFBR3", "HIF1A", "THBS1", "NOD2", "NME1", "ZNF703", "C5AR1", "RUNX3", "CDK6", "WNT5A", "NKX3-1", "SOX11", "TEK", "NME1-NME2", "GPX1", "BAD", "CAV1", "ECM1", "CAV2", "ITGB3", "MTSS1", "ANGPT1", "TINF2", "NME2", "NR4A1", "ANG", "CDKN1C", "ERBB2", "ENG")
502	ANION TRANSMEMBRANE TRANSPORTER ACTIVITY%GO%GO:0008509	1.04126e-07	6.84911e-07	0.704976	0.411337	2.42881	82	c("SLC1A5", "PDPN", "SLC38A1", "SLC1A3", "AQP9", "SLC4A7", "SLC7A8", "SLC4A3", "CLIC4", "ABCC3", "SLCO2B1", "SLC25A13", "SLC1A1", "SLC36A2", "GPR89B", "SLC3A2", "CLCN3", "TTYH3", "SLC25A15", "CLIC1", "CLIC3", "SLC25A26", "GPR89A", "SLC7A5", "SLC6A9", "SLC16A3", "BEST1", "SLC7A2", "SLC22A5", "SLC20A1", "SLC10A3", "SLC4A2", "ABCC5", "SLC25A1", "RHAG", "ANO10", "CLCN5", "SLC22A4", "ANO6", "SLC12A9",…
503	Jak-STAT signaling pathway%KEGG%hsa04630	1.12225e-07	7.36714e-07	0.704976	0.438448	2.52066	70	c("SOCS3", "OSMR", "IL20RA", "PIM1", "IL15RA", "MYC", "STAT3", "IL6R", "PIK3R3", "SOCS1", "IL13RA1", "BCL2L1", "IL10", "CSF2RA", "CBLB", "GRB2", "IFNGR1", "IL4R", "LIFR", "JAK1", "IL2RA", "TPO", "IL10RA", "PIK3R5", "CLCF1", "CCND3", "IL6ST", "IL24", "SPRY1", "IL6", "LIF", "STAT2", "IL2RG", "IFNAR2", "IL15", "PTPN6", "SOS1", "STAT5A", "LEP", "IFNGR2", "PIAS4", "SPRY2", "SPRED1", "IL3RA", "IL9R", "…
504	CELL PART MORPHOGENESIS%GO%GO:0032990	1.16978e-07	7.66395e-07	0.704976	0.310368	2.10393	209	c("BMP7", "TYROBP", "CHL1", "PCNT", "ITGA5", "EPB41L3", "SDCBP", "ITGA2", "PID1", "RTN4RL1", "ABLIM3", "RPS6KA2", "CLTC", "WNT5A", "GRB2", "ACTG1", "PLXNB1", "FES", "COL4A4", "NTN1", "CAP1", "FZD5", "RPGR", "MAP2K1", "STIP1", "TRIO", "PARVA", "COL5A1", "PTEN", "RHOB", "ITGB1", "COL6A3", "RAB8A", "MYL6", "KCNQ3", "MET", "BAIAP2", "ITGB3", "HSP90AA1", "ACTR3", "OCRL", "RPS6KA1", "PARD3", "PAK2", "C…
505	AXONOGENESIS%GO%GO:0007409	1.1733e-07	7.67176e-07	0.704976	0.334915	2.20341	164	c("TYROBP", "CHL1", "ITGA5", "SDCBP", "ITGA2", "RTN4RL1", "ABLIM3", "RPS6KA2", "CLTC", "WNT5A", "GRB2", "ACTG1", "PLXNB1", "FES", "COL4A4", "NTN1", "CAP1", "FZD5", "MAP2K1", "STIP1", "TRIO", "COL5A1", "PTEN", "RHOB", "ITGB1", "COL6A3", "RAB8A", "MYL6", "KCNQ3", "MET", "BAIAP2", "ITGB3", "HSP90AA1", "RPS6KA1", "PARD3", "PAK2", "CFL1", "CSNK2A1", "AP2S1", "RAC2", "ALCAM", "TUBB3", "CACNB3", "SLIT3"…
506	DESTABILIZATION OF MRNA BY AUF1 (HNRNP D0)%REACTOME%REACT_25325.1	1.17711e-07	7.68146e-07	0.704976	0.536371	2.6455	38	c("EIF4G1", "PSME2", "PSMD8", "HSPA1B", "PSMB8", "PSME4", "PSMA4", "PSME1", "PSMA6", "PSMB6", "PSMD14", "PSMA3", "PSMD2", "PSMA5", "PSMD12", "PSMD13", "PSME3", "HSPA8", "PSMB3", "PSMB5", "UBA52", "PABPC1", "HSPA1A", "PSMC3", "PSMB9", "PSMB1", "PSMA7", "PSMD9", "PSMC4", "PSMD3", "PSMC5", "HSPB1")
507	BLOOD VESSEL DEVELOPMENT%GO%GO:0001568	1.19925e-07	7.81048e-07	0.690132	0.390719	2.37633	97	c("CCL2", "SYK", "PDGFRA", "OSR1", "HEY2", "HMOX1", "ACVRL1", "TCF21", "THBS1", "TGFBR2", "ITGA5", "ANXA2", "RAMP1", "SERPINE1", "TGFBI", "SAT1", "ANGPT2", "ENPEP", "FZD5", "NKX2-5", "TEK", "ACTA2", "PARVA", "JMJD6", "CAV1", "ITGB3", "PDGFRB", "WNT5B", "NOTCH1", "ANGPT1", "LRP1", "FLT1", "NR4A1", "EPHB4", "AHR", "ANG", "SRPK2", "ENG", "COL1A1", "ITGB8", "RBPJ", "CCM2", "ID1", "SLIT2", "SOX18", "C…
508	CELLULAR PROCESS INVOLVED IN REPRODUCTION%GO%GO:0048610	1.2168e-07	7.9092e-07	0.690132	0.34981	2.23662	132	c("TCF21", "RPS27", "TUBG1", "CDK2", "TDRD9", "RPLP0", "HYAL2", "RPS19", "RPL34", "RPL27A", "RPS5", "RPL29", "RPL18", "RPS18", "MSH6", "RPL24", "RPL13", "RPS17", "RPS3", "RPL35", "RPS15A", "RPS2", "RPS28", "RPSA", "RPL41", "RPLP2", "RPL18A", "RPS10", "TDRD1", "RPL12", "SRPK1", "RPS9", "RPL36A", "RPS6", "KLHDC3", "RPL21", "RPL28", "RPL26", "RPS12", "RPL37A", "RHBDD1", "RPL38", "PICK1", "RPL10A", "…
509	NUCLEAR-TRANSCRIBED MRNA CATABOLIC PROCESS, NONSENSE-MEDIATED DECAY%GO%GO:0000184	1.24295e-07	8.05559e-07	0.690132	0.407248	2.44399	90	c("RPS27", "EIF4G1", "RPLP0", "RPS19", "RPL34", "RPL27A", "RPS5", "RPL29", "RPL18", "RPS18", "RPL24", "RPL13", "ETF1", "RPS17", "RPS3", "RPL35", "RPS15A", "RPS2", "MAGOH", "RPS28", "RPSA", "RPL41", "RPLP2", "RPL18A", "RPS10", "RPL12", "RPS9", "RPL36A", "RPS6", "RPL21", "RPL28", "RPL26", "RPS12", "GSPT1", "RPL37A", "RPL38", "RPL10A", "RPS15", "RPL17", "RPL36", "RPL13A", "RPL4", "RPS16", "RPL27", "…
510	MITOTIC METAPHASE AND ANAPHASE%REACTOME%REACT_150314.1	1.2442e-07	8.05559e-07	0.690132	0.393792	2.36482	91	c("RPS27", "PPP2R5A", "PSME2", "PSMD8", "PPP1CC", "PSMB8", "PPP2CB", "CLIP1", "AHCTF1", "RANGAP1", "SPC24", "PSME4", "PSMA4", "PSME1", "PSMA6", "LMNB1", "PSMB6", "KIF2A", "CENPE", "PSMD14", "PSMA3", "NDEL1", "ANAPC7", "PSMD2", "B9D2", "PSMA5", "PSMD12", "FBXO5", "NUDC", "PSMD13", "ZW10", "ANAPC5", "PSME3", "BIRC5", "PTTG1", "CENPO", "PSMB3", "KNTC1", "CENPN", "NUP85", "PSMB5", "UBA52", "PSMC3", "…
511	Rheumatoid arthritis%KEGG%hsa05323	1.24681e-07	8.05671e-07	0.690132	0.457745	2.52083	58	c("CCL2", "TLR4", "TLR2", "CD86", "HLA-DMA", "HLA-DRA", "HLA-DMB", "CXCL1", "ITGB2", "ATP6V1A", "HLA-DPA1", "TEK", "HLA-DRB4", "CSF1", "ATP6V0A2", "HLA-DPB1", "ANGPT1", "FLT1", "ATP6V0A1", "ATP6V1F", "ACP5", "CXCL6", "TCIRG1", "ATP6V0C", "JUN", "FOS", "IL6", "CXCL12", "IL15", "TNFSF13B", "HLA-DRB3", "TNFSF13", "ATP6V0B", "IL18", "ATP6AP1", "LTB", "IL1B", "ITGAL", "ATP6V0D1", "ATP6V1B2", "HLA-DOA")
512	PROTEOLYSIS%GO%GO:0006508	1.25535e-07	8.096e-07	0.690132	0.314651	2.12136	201	c("CTSC", "CTSB", "ADAMTS9", "LRP8", "RNF144B", "ZMPSTE24", "HM13", "CPA3", "CDK2", "PSME2", "HECTD1", "PSMD8", "UHRF1", "NGFR", "DNAJB9", "PSMB8", "DERL1", "AURKA", "UCHL3", "ST14", "UBE2D3", "MALT1", "LGMN", "CTSG", "FURIN", "DPP3", "PSME4", "TPSAB1", "SEC61B", "ITCH", "FBXO6", "PSMA4", "MMP19", "PSME1", "PSMA6", "CTSH", "UBE3C", "HSP90B1", "TRIM13", "PSMB6", "NFKB1", "UBE2J1", "CASP7", "PSMD14…
513	M/G1 TRANSITION OF MITOTIC CELL CYCLE%GO%GO:0000216	1.28567e-07	8.27543e-07	0.690132	0.508319	2.61104	44	c("CDK2", "PSME2", "PSMD8", "PSMB8", "CDC7", "POLA2", "PSME4", "PSMA4", "PSME1", "PSMA6", "PSMB6", "PSMD14", "PSMA3", "PSMD2", "MCM8", "PSMA5", "PSMD12", "GMNN", "PSMD13", "PSME3", "PSMB3", "CDT1", "POLE2", "MCM10", "PSMB5", "UBA52", "PSMC3", "PSMB9", "PSMB1", "PSMA7", "PSMD9", "PSMC4", "PSMD3", "PSMC5", "MCM5")
514	CELLULAR RESPONSE TO MOLECULE OF BACTERIAL ORIGIN%GO%GO:0071219	1.28921e-07	8.28207e-07	0.690132	0.535308	2.64026	38	c("CCL2", "TLR4", "TLR2", "IRAK1", "SERPINE1", "LY96", "AXL", "IL10", "WNT5A", "LILRB2", "FZD5", "PYCARD", "TNFRSF1B", "TLR1", "GSTP1", "CD14", "LYN", "NR1H3", "HCK", "NLRP3", "TLR6", "TNIP2", "LILRB1", "MTDH", "IL18", "IL1B", "PRKCE", "SHPK", "TNFSF4")
515	PROTEIN DOMAIN SPECIFIC BINDING%GO%GO:0019904	1.29884e-07	8.32771e-07	0.690132	0.342973	2.24214	155	c("PLSCR1", "TGFBR3", "LRRFIP2", "CYBA", "NOD2", "AXIN2", "ESRRG", "LITAF", "BCL2L1", "NDFIP2", "GRB2", "PAWR", "RARA", "FZD5", "PYCARD", "ESRRA", "GPX1", "RIPK2", "PDE2A", "PTEN", "ETV6", "NCF1", "YWHAH", "CLCN3", "E2F4", "SFRP5", "HSP90AA1", "RIPK1", "MYD88", "GATA2", "CITED2", "SLC22A5", "ACSL3", "DAG1", "PLEKHA1", "ERCC1", "ADRB1", "SKI", "LILRB1", "KPNB1", "MKL1", "CALM2", "SRRM2", "SHISA5",…
516	RESPONSE TO LIPID%GO%GO:0033993	1.32261e-07	8.46366e-07	0.690132	0.361522	2.28298	122	c("CCL2", "BMP7", "SLC11A1", "PPARG", "STAT3", "TLR4", "TGFBR3", "TLR2", "ABCG1", "AKR1C2", "CCL21", "IRAK1", "THBS1", "TGFBR2", "SELE", "TESC", "SERPINE1", "LY96", "PID1", "AXL", "SPP1", "IL10", "PMVK", "PDK4", "WNT5A", "IRAK3", "LILRB2", "NKX3-1", "AKR1C3", "RARA", "CITED4", "PYCARD", "TNFRSF1B", "ALPL", "ANXA1", "CAV1", "GSTP1", "PTGER2", "CD14", "RXRA", "CTSH", "MAPKAPK3", "WNT5B", "LYN", "NR…
517	ENZYME ACTIVATOR ACTIVITY%GO%GO:0008047	1.34242e-07	8.57384e-07	0.690132	0.365515	2.32099	125	c("NCKAP1L", "CDKN1A", "PRKCD", "CXCL1", "AGTR1", "PREX1", "AXIN2", "TBC1D2", "PRKRA", "RGS19", "RGS18", "RGS10", "RGS1", "PSAP", "NKX3-1", "MAL", "MYBPC3", "ERRFI1", "CDC42EP2", "MALT1", "PYCARD", "MAP2K1", "GMFG", "RGS2", "BAD", "ADAP2", "IQGAP1", "CCL8", "CAV1", "GMFB", "OCRL", "CTSH", "ARHGAP4", "PAK2", "PCOLCE", "ARHGAP9", "ADRM1", "DNAJC1", "PSMD14", "ECT2", "STK3", "AHSA1", "AGT", "SIPA1",…
518	REGULATION OF PROTEIN UBIQUITINATION%GO%GO:0031396	1.34647e-07	8.58309e-07	0.690132	0.406231	2.42217	86	c("CDK2", "PSME2", "PSMD8", "NDFIP2", "SPHK1", "PSMB8", "MALT1", "RIPK2", "PTEN", "CAV1", "PSME4", "DAXX", "PSMA4", "PSME1", "PSMA6", "PSMB6", "ANGPT1", "PSMD14", "PSMA3", "FEM1A", "FEM1B", "ANAPC7", "PSMD2", "WFS1", "NXN", "MAD2L2", "N4BP1", "PSMA5", "PSMD12", "FBXO5", "FANCI", "PSMD13", "ANAPC5", "PSME3", "RASSF1", "PSMB3", "HSPBP1", "GTPBP4", "PSMB5", "UBA52", "BAG5", "STRA13", "PSMC3", "UBXN1…
519	REGULATION OF SEQUENCE-SPECIFIC DNA BINDING TRANSCRIPTION FACTOR ACTIVITY%GO%GO:0051090	1.3622e-07	8.66661e-07	0.690132	0.34752	2.25287	146	c("BMP7", "S100A9", "PIM1", "S100A8", "ABRA", "PPARG", "LRP8", "TLR4", "HMOX1", "TLR2", "BTK", "IL6R", "IRAK1", "NOD2", "PTGIS", "IL10", "SPHK1", "WNT5A", "IRAK3", "ANXA3", "HIPK2", "EGLN1", "MALT1", "PYCARD", "S100A12", "RIPK2", "TRIM37", "PTEN", "NFKBIA", "CEBPG", "NFKBIB", "TRIM5", "RPS3", "FOXK2", "ITCH", "SMARCA4", "SFRP5", "PSMA6", "RIPK1", "CAMK1D", "RIPK3", "NFKB1", "HCK", "NLRP3", "PRKCH…
520	Cytokine-cytokine receptor interaction%KEGG%hsa04060	1.40584e-07	8.92709e-07	0.690132	0.346258	2.22276	137	c("CCL2", "BMP7", "CCL11", "OSMR", "IL18R1", "PDGFRA", "IL20RA", "IL15RA", "CCR1", "CSF1R", "IL1R1", "IL17RA", "IL6R", "CCL21", "TGFBR2", "CXCL1", "IL13RA1", "IL1R2", "TNFRSF21", "TNFRSF10A", "LTBR", "IL17RB", "TNFRSF1A", "IL10", "NGFR", "CSF2RA", "IFNGR1", "IL4R", "CXCL16", "LIFR", "CXCL2", "IL2RA", "TPO", "IL10RA", "TNFRSF1B", "CCL8", "MET", "CSF1", "CLCF1", "PDGFRB", "ACVR1B", "IL18RAP", "TNFR…
521	POSITIVE REGULATION OF MULTICELLULAR ORGANISMAL PROCESS%GO%GO:0051240	1.44523e-07	9.15957e-07	0.690132	0.330222	2.18309	167	c("C3", "BMP7", "ATP2A2", "SYK", "OSR1", "SLC11A1", "MYC", "CSF1R", "TLR4", "HMOX1", "IL17RA", "EDN1", "TLR2", "HIF1A", "IL6R", "THBS1", "NOD2", "DDX3X", "FBN2", "SERPINE1", "IRF1", "ZBTB16", "SPHK1", "WNT5A", "RPS19", "LILRB2", "GRIK2", "CD74", "RARA", "SOX11", "MALT1", "FZD5", "NKX2-5", "PYCARD", "IFI16", "RIPK2", "RGS2", "GPM6B", "MAPK13", "NFKBIA", "NFKBIB", "CAV1", "CD14", "ZC3HAV1", "RIPK1"…
522	Influenza A%KEGG%hsa05164	1.45103e-07	9.17873e-07	0.690132	0.380992	2.36132	108	c("CCL2", "SOCS3", "TLR4", "HSPA6", "HLA-DMA", "PIK3R3", "HLA-DRA", "HLA-DMB", "TNFRSF10A", "KPNA2", "TNFRSF1A", "HSPA1B", "ACTG1", "IFNGR1", "NXT1", "HLA-DPA1", "JAK1", "PYCARD", "MAP2K1", "MAPK13", "FURIN", "NFKBIA", "NFKBIB", "DNAJC3", "PIK3R5", "HLA-DRB4", "HLA-DPB1", "IRAK4", "MYD88", "MAP2K4", "DNAJB1", "NFKB1", "TRIM25", "NLRP3", "MAP2K3", "JUN", "RELA", "TNFRSF10D", "ACTB", "MAP2K2", "IL6…
523	IL2%NETPATH%IL2	1.49146e-07	9.41558e-07	0.690132	0.478797	2.56984	52	c("SOCS3", "EIF4EBP1", "SYK", "STAT3", "PIK3R3", "SOCS1", "CDK2", "GRB2", "JAK1", "IL2RA", "MAP2K1", "BAD", "EIF3B", "HSP90AA1", "LYN", "NFKB1", "ELK1", "RPS6", "NMI", "IRS2", "ETS2", "JUN", "YBX1", "RELA", "SHC1", "FOXO3", "MAP2K2", "IL2RG", "IL15", "PTPN6", "SOS1", "CRKL", "RAF1", "VAV1", "STAT5A", "MAPK14", "CCNE1", "CREB1", "ETS1", "VIL1", "MAPK3", "PIK3CD")
524	CYCLIN E ASSOCIATED EVENTS DURING G1 S TRANSITION%REACTOME%REACT_1574.2	1.49417e-07	9.41558e-07	0.690132	0.529985	2.63045	39	c("MYC", "CDKN1A", "CDK2", "PSME2", "PSMD8", "PSMB8", "PSMA4", "PSME1", "PSMA6", "PSMB6", "PSMD14", "PSMA3", "PSMD2", "PSMA5", "PSMD12", "PSMD13", "PSME3", "PSMB3", "PSMB5", "UBA52", "MAX", "PSMC3", "PSMB9", "PSMB1", "PSMA7", "PSMD9", "CKS1B", "PSMC4", "PSMD3", "CCNE1", "PSMC5")
525	MYD88-INDEPENDENT TOLL-LIKE RECEPTOR SIGNALING PATHWAY%GO%GO:0002756	1.56323e-07	9.83198e-07	0.690132	0.486322	2.56089	48	c("TLR4", "IRAK1", "NOD2", "LY96", "RPS6KA2", "MAP2K1", "RIPK2", "NFKBIA", "NFKBIB", "CD14", "RPS6KA1", "RIPK1", "MAPKAPK3", "MAP2K4", "NFKB1", "ELK1", "DUSP7", "TICAM2", "CHUK", "MAP2K3", "JUN", "RELA", "FOS", "MAP2K2", "MAPK7", "UBA52", "IRAK2", "MAPK9", "NFKB2", "TICAM1", "PRKCE", "MAPKAPK2", "MAPK14", "IKBKB", "CREB1", "IRF7", "IKBKG", "IKBKE", "MAPK3")
526	DAP12 INTERACTIONS%REACTOME%REACT_147694.2	1.58929e-07	9.9769e-07	0.690132	0.417376	2.44829	80	c("FGF7", "SYK", "PDGFRA", "TYROBP", "CDKN1A", "ADCY3", "BTK", "CD86", "IL6R", "PRKAR2A", "PIK3R3", "PRKCD", "B2M", "JAK1", "MAP2K1", "PTEN", "BAD", "RPS6KB2", "ITPR3", "LCP2", "HLA-E", "PDGFRB", "ADCY1", "NR4A1", "IRS2", "NRAS", "CHUK", "TREM1", "HLA-B", "CALM2", "ERBB2", "FOXO3", "MAP2K2", "IL6", "ADCY7", "SIGLEC16", "YWHAB", "SOS1", "KRAS", "RAF1", "KLB", "VAV1", "PRKCE", "MAPKAP1", "CALM3", "…
527	Toll-like receptor signaling pathway%KEGG%hsa04620	1.59575e-07	9.99841e-07	0.690132	0.456181	2.53976	62	c("MAP3K8", "TLR4", "TLR2", "CD86", "IRAK1", "PIK3R3", "LY96", "SPP1", "TLR8", "MAP2K1", "MAPK13", "NFKBIA", "TLR1", "PIK3R5", "CD14", "RIPK1", "IRAK4", "MYD88", "MAP2K4", "NFKB1", "IRF5", "FADD", "TLR5", "TICAM2", "TLR6", "CHUK", "MAP2K3", "JUN", "RELA", "FOS", "MAP2K2", "IL6", "IFNAR2", "MAPK9", "CXCL10", "IL1B", "TICAM1", "CXCL9", "CD40", "MAPK14", "RAC1", "IKBKB", "IRF7", "IKBKG", "IKBKE", "M…
528	NITROGEN COMPOUND TRANSPORT%GO%GO:0071705	1.65952e-07	1.03783e-06	0.690132	0.355148	2.26452	128	c("SLC1A5", "SYK", "PDPN", "SLC11A1", "CD209", "SLC38A1", "SLC36A4", "EDN1", "SLC1A3", "SLC36A1", "AQP9", "SLC38A2", "SLC7A8", "TST", "SLC6A6", "SLC29A2", "FOLR2", "SLC7A1", "ACACB", "SLC25A13", "EIF5A", "ABCB6", "TAP1", "SLC1A1", "SLC36A2", "SLC3A2", "SLC25A19", "SLC25A15", "SLC7A7", "SLC25A26", "MAGOH", "RPSA", "SLC7A5", "SH3BP4", "SLC38A5", "SLC7A2", "SLC22A5", "GAL", "FYTTD1", "PICK1", "TAP2"…
529	Chronic myeloid leukemia%KEGG%hsa05220	1.69441e-07	1.05764e-06	0.690132	0.485589	2.55704	48	c("MYC", "CDKN1A", "TGFBR2", "PIK3R3", "BCL2L1", "CDK6", "CBLB", "GRB2", "MAP2K1", "BAD", "NFKBIA", "PIK3R5", "NFKB1", "E2F3", "NRAS", "CHUK", "RELA", "SHC1", "MAP2K2", "CTBP1", "SOS1", "KRAS", "CTBP2", "ABL1", "CRKL", "RAF1", "ARAF", "STAT5A", "BCR", "MDM2", "IKBKB", "RUNX1", "IKBKG", "E2F2", "SMAD3", "MAPK3", "PIK3CD", "HDAC1", "TP53")
530	CYTOSOLIC LARGE RIBOSOMAL SUBUNIT%GO%GO:0022625	1.75267e-07	1.09194e-06	0.690132	0.502135	2.59219	45	c("RPLP0", "RPL34", "RPL27A", "RPL29", "RPL18", "RPL24", "RPL13", "RPL35", "RPL41", "RPLP2", "RPL18A", "RPL12", "RPL36A", "RPL21", "RPL28", "RPL26", "RPL37A", "RPL38", "RPL10A", "FXR2", "RPL17", "RPL36", "RPL13A", "RPL4", "RPL27", "RPL11", "RPL39", "RPL6", "UBA52", "RPL19", "RPL8", "RPL3")
531	SCF-BETA-TRCP MEDIATED DEGRADATION OF EMI1%REACTOME%REACT_6821.2	1.75629e-07	1.09214e-06	0.690132	0.547569	2.63659	34	c("PSME2", "PSMD8", "PSMB8", "PSME4", "PSMA4", "PSME1", "PSMA6", "PSMB6", "PSMD14", "PSMA3", "PSMD2", "PSMA5", "PSMD12", "FBXO5", "PSMD13", "PSME3", "PSMB3", "PSMB5", "UBA52", "PSMC3", "PSMB9", "PSMB1", "PSMA7", "PSMD9", "PSMC4", "PSMD3", "CDC20", "PSMC5")
532	CATION TRANSPORT%GO%GO:0006812	1.78458e-07	1.10684e-06	0.690132	0.341349	2.22668	153	c("ATP2A2", "SLC1A5", "KCNIP2", "KCNK1", "SYK", "KLHL3", "SLC11A1", "CCR1", "SLC36A4", "HCN4", "KCNJ8", "SCARA5", "TFRC", "CCL21", "SLC7A8", "SLC39A8", "SLC39A14", "SLC31A2", "KCNH2", "RAMP1", "MAGT1", "SLC31A1", "KCNK3", "ACACB", "STEAP3", "CLTC", "SLC11A2", "HVCN1", "P2RX5", "ABCB6", "ATP6V1A", "SLC36A2", "GRIN3A", "PDE2A", "KCNN2", "SLC3A2", "SLC9A1", "CCL8", "SLC39A1", "KCNQ3", "SCN9A", "CAV1…
533	REGULATION OF ORNITHINE DECARBOXYLASE (ODC)%REACTOME%REACT_13565.2	1.78663e-07	1.10684e-06	0.690132	0.562105	2.66051	32	c("NQO1", "PSME2", "PSMD8", "PSMB8", "PSME4", "PSMA4", "PSME1", "PSMA6", "PSMB6", "PSMD14", "PSMA3", "PSMD2", "PSMA5", "PSMD12", "OAZ1", "PSMD13", "PSME3", "PSMB3", "PSMB5", "PSMC3", "PSMB9", "PSMB1", "PSMA7", "PSMD9", "PSMC4", "PSMD3", "PSMC5")
534	CELL PROJECTION MORPHOGENESIS%GO%GO:0048858	1.80389e-07	1.11544e-06	0.690132	0.310596	2.09915	205	c("BMP7", "TYROBP", "CHL1", "PCNT", "ITGA5", "EPB41L3", "SDCBP", "ITGA2", "RTN4RL1", "ABLIM3", "RPS6KA2", "CLTC", "WNT5A", "GRB2", "ACTG1", "PLXNB1", "FES", "COL4A4", "NTN1", "CAP1", "FZD5", "RPGR", "MAP2K1", "STIP1", "TRIO", "PARVA", "COL5A1", "PTEN", "RHOB", "ITGB1", "COL6A3", "RAB8A", "MYL6", "KCNQ3", "MET", "BAIAP2", "ITGB3", "HSP90AA1", "ACTR3", "OCRL", "RPS6KA1", "PARD3", "PAK2", "CCDC28B",…
535	GLYCOPROTEIN BIOSYNTHETIC PROCESS%GO%GO:0009101	1.85164e-07	1.14282e-06	0.690132	0.363176	2.29082	121	c("GFPT2", "CHST7", "ALG3", "CHST9", "UAP1", "RPN1", "MCFD2", "MAGT1", "CHSY1", "ST3GAL1", "EDEM2", "GNPNAT1", "B4GALT6", "CSPG4", "MGAT4A", "PMM2", "RPN2", "ALG8", "MAN1A1", "UST", "DSE", "ALG5", "SEC24D", "ART4", "NPC1", "B4GALT3", "DDOST", "CANT1", "MAN2A2", "DCN", "GCNT1", "GMPPB", "MGAT1", "UBE2J1", "GALNT10", "CALR", "PGM3", "GALNT1", "CHST3", "B4GALT1", "B3GAT3", "ST3GAL2", "SIRT2", "GANAB…
536	COATED VESICLE%GO%GO:0030135	1.94213e-07	1.19644e-06	0.690132	0.400221	2.3912	87	c("APOB", "HLA-DRA", "MCFD2", "TMED3", "B2M", "PICALM", "CLTC", "NCALD", "CD74", "HLA-DPA1", "SLC30A3", "FURIN", "SEC24D", "TMED9", "VWF", "HLA-DRB4", "TMED2", "HLA-E", "OCRL", "ICA1", "HLA-DPB1", "AP2S1", "ECE1", "HLA-A", "TRAPPC4", "AP1G1", "GGA2", "PPT1", "COPB2", "HLA-B", "IGF2R", "DNAJC5", "FCGR1A", "NECAP2", "LMAN1", "HIP1R", "LDLR", "CLTA", "COPZ1", "FCGR1B", "HSPA8", "TMED10", "SEC23A", "…
537	SIGNALING BY INSULIN RECEPTOR%REACTOME%REACT_498.7	2.06181e-07	1.2678e-06	0.690132	0.491655	2.56488	46	c("FGF7", "EIF4EBP1", "IL6R", "EIF4G1", "ATP6V1A", "JAK1", "MAP2K1", "CAB39L", "EEF2K", "ATP6V0A2", "STRADB", "RPS6", "ATP6V0A1", "ATP6V1F", "IRS2", "TCIRG1", "NRAS", "PRKAG1", "DOK1", "ATP6V0C", "SHC1", "MAP2K2", "IL6", "RHEB", "YWHAB", "SOS1", "KRAS", "CAB39", "ATP6V0B", "RAF1", "KLB", "ATP6V0D1", "TRIB3", "ATP6V1B2", "PRKAG2")
538	REGULATION OF CELLULAR AMINE METABOLIC PROCESS%GO%GO:0033238	2.07835e-07	1.27439e-06	0.690132	0.527012	2.61569	39	c("NQO1", "PRKCD", "PSME2", "PSMD8", "PSMB8", "PSME4", "PSMA4", "PSME1", "PSMA6", "PSMB6", "PSMD14", "PSMA3", "ACSL3", "PSMD2", "PSMA5", "PSMD12", "PAOX", "OAZ1", "PSMD13", "LDLR", "PSME3", "PSMB3", "PSMB5", "PSMC3", "PSMB9", "PSMB1", "PSMA7", "PSMD9", "PSMC4", "PSMD3", "PSMC5")
539	POSITIVE REGULATION OF TRANSPORT%GO%GO:0051050	2.08024e-07	1.27439e-06	0.690132	0.33961	2.2104	150	c("CCL2", "C3", "DOCK2", "NCKAP1L", "SLC11A1", "WNK3", "CCR1", "CSF1R", "HCLS1", "TLR4", "EDN1", "TLR2", "CCL21", "PRKCD", "SELE", "NOD2", "ANXA2", "DAB2", "TESC", "SERPINE1", "FGR", "MERTK", "IL10", "SPHK1", "P2RX5", "WNT5A", "HYAL2", "NKX3-1", "SOX11", "SYTL4", "NKX2-5", "PYCARD", "NR1H2", "BAD", "NFKBIA", "ANXA1", "CAV1", "CD274", "EXPH5", "CAMK1D", "PDGFRB", "RAB5A", "F2RL3", "GATA2", "NR1H3"…
540	RESPONSE TO ORGANIC NITROGEN%GO%GO:0010243	2.12248e-07	1.29786e-06	0.690132	0.339377	2.19126	142	c("NAMPT", "SOCS3", "FGF7", "EIF4EBP1", "PPARG", "STAT3", "HMOX1", "ADCY3", "AQP9", "PRKAR2A", "SOCS1", "NOD2", "EIF4G1", "MYO5A", "PDK4", "GRB2", "IRAK3", "GNG12", "ATP6V1A", "MAP2K1", "PDE2A", "CAB39L", "BAD", "EEF2K", "BAIAP2", "ATP6V0A2", "HSP90B1", "SH3BP4", "KYNU", "STRADB", "LYN", "IRF5", "ADCY1", "RPS6", "PTPN1", "ATP6V0A1", "ATP6V1F", "IRS2", "TCIRG1", "NRAS", "PRKAG1", "DOK1", "ATP6V0C"…
541	ACTIN CYTOSKELETON ORGANIZATION%GO%GO:0030036	2.14575e-07	1.30966e-06	0.690132	0.361816	2.2975	125	c("MYH6", "FGF7", "FGD2", "DOCK2", "WAS", "PDGFRA", "NCKAP1L", "PARVB", "PLEK", "NEDD9", "ALDOA", "CXCL1", "PREX1", "SDCBP", "NF2", "AIF1", "CORO1C", "CORO1A", "PHACTR1", "FERMT2", "ARHGDIB", "ADD1", "EPB41L4B", "EPS8", "PAWR", "CDC42EP2", "ARPC5", "SSH2", "MYO1B", "ARPC4", "BAIAP2", "RHOF", "PDGFRB", "HSP90B1", "CFL1", "MTSS1", "FGD3", "CDC42BPA", "PTPN1", "TNFAIP1", "PACSIN2", "FMNL2", "DBN1", …
542	REGULATION OF ENDOPEPTIDASE ACTIVITY%GO%GO:0052548	2.35819e-07	1.43667e-06	0.690132	0.353689	2.25155	127	c("SERPINA3", "S100A9", "BIRC3", "SPOCK1", "TNFAIP8", "S100A8", "PPARG", "MYC", "TFPI", "SERPINA1", "THBS1", "DDX3X", "SERPINE1", "CD44", "TNFRSF10A", "MTCH1", "SLC11A2", "IFI27", "SERPINH1", "CAST", "SERPINB1", "NKX3-1", "CST3", "PYCARD", "IFI16", "GPX1", "SERPINB8", "SERPING1", "BAD", "FURIN", "RPS3", "RPS6KA1", "RIPK1", "PAK2", "BAK1", "ADRM1", "CSNK2A1", "CASP7", "PSMD14", "SPINK1", "SERPINB6…
543	TSH%NETPATH%TSH	2.3752e-07	1.44437e-06	0.690132	0.463223	2.53943	57	c("SOCS3", "SLC2A1", "EIF4EBP1", "ATP1A1", "CTSB", "PDE4D", "STAT3", "SOCS1", "GNAO1", "CDK2", "RAP1GAP", "JAK1", "MAP2K1", "GNA13", "APEX1", "NFKBIA", "NFKBIB", "ANXA1", "RPS6KA1", "CCND3", "RPS6", "CALR", "KCNIP3", "IRS2", "VASP", "MAP2K3", "RELA", "SHC1", "GNA12", "GNAI2", "RHOA", "CGA", "HSPA8", "RAF1", "HSPA5", "LEP", "RALGDS", "MAPK14", "CCNE1", "IKBKB", "GNAI3", "CREB1")
544	CXCR4%IOB%CXCR4	2.51081e-07	1.52403e-06	0.674963	0.425493	2.43008	68	c("SOCS3", "SYK", "WAS", "PIM1", "STAT3", "PRKCD", "SOCS1", "RPS6KA2", "CBLB", "ITGB2", "JAK1", "MAP2K1", "GNA13", "BAD", "NFKBIA", "NFKBIB", "LCP2", "CFL1", "LYN", "NFKB1", "GRK6", "ELK1", "RPS6", "INPP5D", "DOK1", "CHUK", "MAP2K3", "RELA", "CDC42", "FOXO3", "MAP2K2", "CXCL12", "RHOA", "STAT2", "YWHAB", "PTPN6", "HSPA8", "CRKL", "RAF1", "BCAR1", "VAV1", "FYB", "RAC1", "IKBKB", "USP14", "CREB1", …
545	SCF(SKP2)-MEDIATED DEGRADATION OF P27 P21%REACTOME%REACT_9003.1	2.58841e-07	1.5675e-06	0.674963	0.53667	2.62248	36	c("CDKN1A", "CDK2", "PSME2", "PSMD8", "PSMB8", "PSMA4", "PSME1", "PSMA6", "PSMB6", "PSMD14", "PSMA3", "PSMD2", "PSMA5", "PSMD12", "PSMD13", "PSME3", "PSMB3", "PSMB5", "UBA52", "PSMC3", "PSMB9", "PSMB1", "PSMA7", "PSMD9", "CKS1B", "PSMC4", "PSMD3", "CCNE1", "PSMC5")
546	P53-DEPENDENT G1 DNA DAMAGE RESPONSE%REACTOME%REACT_1625.3	2.59668e-07	1.5675e-06	0.674963	0.52348	2.59816	39	c("CDKN1A", "CDK2", "PSME2", "PSMD8", "PSMB8", "PSME4", "PSMA4", "PSME1", "PSMA6", "PSMB6", "PSMD14", "PSMA3", "PSMD2", "PSMA5", "PSMD12", "PSMD13", "PSME3", "RFWD2", "PSMB3", "PSMB5", "UBA52", "PSMC3", "MDM2", "PSMB9", "PSMB1", "PSMA7", "PSMD9", "PSMC4", "PSMD3", "CCNE1", "PSMC5")
547	P53-DEPENDENT G1 S DNA DAMAGE CHECKPOINT%REACTOME%REACT_85.1	2.59668e-07	1.5675e-06	0.674963	0.52348	2.59816	39	c("CDKN1A", "CDK2", "PSME2", "PSMD8", "PSMB8", "PSME4", "PSMA4", "PSME1", "PSMA6", "PSMB6", "PSMD14", "PSMA3", "PSMD2", "PSMA5", "PSMD12", "PSMD13", "PSME3", "RFWD2", "PSMB3", "PSMB5", "UBA52", "PSMC3", "MDM2", "PSMB9", "PSMB1", "PSMA7", "PSMD9", "PSMC4", "PSMD3", "CCNE1", "PSMC5")
548	REGULATION OF IMMUNE EFFECTOR PROCESS%GO%GO:0002697	2.62628e-07	1.58248e-06	0.674963	0.395243	2.36911	89	c("C3", "BIRC3", "SYK", "DOCK2", "PVR", "BTK", "CD86", "STXBP2", "FGR", "CD4", "B2M", "IL10", "WNT5A", "IRAK3", "RPS19", "CD55", "FES", "C2", "CD74", "RARA", "MALT1", "TAP1", "SERPING1", "ITCH", "AP1B1", "CFI", "CLCF1", "ZC3HAV1", "PAK2", "AP2S1", "LYN", "HCK", "HLA-A", "MICB", "CR1", "TAP2", "AP1G1", "LILRB1", "BIRC2", "CFP", "A2M", "IL6", "BST2", "TNFSF13", "AP2A2", "RNF216", "IL1B", "TNFSF4", …
549	REGULATION OF CELL ADHESION%GO%GO:0030155	2.65561e-07	1.59724e-06	0.674963	0.375887	2.2976	99	c("BMP7", "SPOCK1", "SYK", "NCKAP1L", "TGM2", "FERMT3", "HAS2", "PLAU", "ACVRL1", "TFE3", "ADA", "CCL21", "THBS1", "PRKCD", "TESC", "SERPINE1", "CD44", "TGFBI", "ZNF703", "CDK6", "SNAI2", "NF2", "ARHGDIB", "FES", "TEK", "PTEN", "GPM6B", "CSF1", "CHRD", "CD164", "FXYD5", "LYN", "NOTCH1", "ANGPT1", "ARHGDIA", "CALR", "CITED2", "DLL1", "SIPA1", "MAD2L2", "MIA3", "ERBB2", "ENG", "ADIPOQ", "MAPK7", "E…
550	KITRECEPTOR%IOB%KITRECEPTOR	2.77885e-07	1.66832e-06	0.674963	0.472687	2.53705	52	c("EIF4EBP1", "WAS", "STAT3", "BTK", "SOCS1", "PTPRU", "TNFRSF10A", "FGR", "CLTC", "CBLB", "SH3KBP1", "GRB2", "FES", "MAP2K1", "BAD", "YES1", "ACTR2", "RPS6KA1", "LYN", "HCK", "ELK1", "RPS6", "INPP5D", "DOK1", "JUN", "RELA", "SHC1", "MAP2K2", "PTPN6", "SOS1", "ABL1", "CRKL", "RAF1", "SH2B3", "VAV1", "STAT5A", "MAPK14", "SPRED1", "IL7R", "GRAP", "MAPK3", "FER")
551	PROTEIN OLIGOMERIZATION%GO%GO:0051259	2.87382e-07	1.7222e-06	0.674963	0.386504	2.35662	98	c("MGST1", "BLM", "GNMT", "AASS", "HMOX1", "SHMT1", "SCARA5", "IRAK1", "GPX3", "NOD2", "ALDOA", "ALOX5AP", "TK1", "ACACB", "SOD2", "DGKD", "RPS19", "SH3GLB1", "AKR1C3", "MALT1", "TEK", "FBP1", "SLC9A1", "ATL3", "EHD1", "STOM", "TRIM5", "CRYAB", "CAV1", "ITPR3", "VWF", "RIPK1", "QPRT", "RIPK3", "ATL2", "ECT2", "NLRP3", "STOML2", "TOR2A", "SKI", "COL6A2", "TOR1B", "TRIM21", "ADIPOQ", "OAS1", "GCH1"…
552	REGULATION OF DNA REPLICATION%REACTOME%REACT_829.4	2.94662e-07	1.76263e-06	0.674963	0.516023	2.64017	43	c("CDKN1A", "CDK2", "PSME2", "PSMD8", "PSMB8", "PSME4", "PSMA4", "PSME1", "PSMA6", "PSMB6", "PSMD14", "PSMA3", "PSMD2", "E2F3", "MCM8", "PSMA5", "PSMD12", "GMNN", "PSMD13", "PSME3", "PSMB3", "CDT1", "MCM10", "PSMB5", "UBA52", "PSMC3", "PSMB9", "PSMB1", "PSMA7", "PSMD9", "PSMC4", "PSMD3", "PSMC5", "MCM5", "E2F2")
553	SIGNALING BY EGFR%REACTOME%REACT_9417.7	2.96194e-07	1.76859e-06	0.674963	0.399245	2.38052	86	c("FGF7", "PDGFRA", "CDKN1A", "ADCY3", "CD86", "IL6R", "PRKAR2A", "PIK3R3", "PRKCD", "SH3KBP1", "EPN1", "JAK1", "MAP2K1", "PTEN", "BAD", "RPS6KB2", "ITPR3", "PDGFRB", "AP2S1", "ADCY1", "NR4A1", "IRS2", "CSK", "NRAS", "CHUK", "SPRY1", "CDC42", "SHC1", "CALM2", "ERBB2", "FOXO3", "MAP2K2", "IL6", "ADCY7", "CLTA", "YWHAB", "SOS1", "KRAS", "UBA52", "AP2A2", "RAF1", "KLB", "VAV1", "PRKCE", "MAPKAP1", "…
554	TRAF6 MEDIATED INDUCTION OF PROINFLAMMATORY CYTOKINES%REACTOME%REACT_6782.4	2.98158e-07	1.77711e-06	0.674963	0.49925	2.56446	44	c("IL6R", "IRAK1", "NOD2", "RPS6KA2", "JAK1", "MAP2K1", "S100A12", "RIPK2", "PPP2CB", "NFKBIA", "NFKBIB", "RPS6KA1", "MAPKAPK3", "MYD88", "MAP2K4", "NFKB1", "ELK1", "DUSP7", "CHUK", "MAP2K3", "JUN", "RELA", "FOS", "MAP2K2", "IL6", "MAPK7", "UBA52", "IRAK2", "MAPK9", "NFKB2", "MAPKAPK2", "MAPK14", "IKBKB", "CREB1", "IKBKG")
555	TRANSMISSION OF NERVE IMPULSE%GO%GO:0019226	3.02891e-07	1.80206e-06	0.674963	0.318987	2.12463	178	c("NPTX2", "KCNIP2", "KCNK1", "NQO1", "SLC38A1", "ADCY3", "GLUL", "SLC1A3", "HCN4", "SLC38A2", "KCNJ8", "GABBR2", "EPB41L3", "KCNH2", "SDCBP", "GCHFR", "KCNK3", "RPS6KA2", "VIPR1", "GRIN2A", "NCALD", "MUSK", "GNG12", "PMP22", "MAL", "GRIK2", "SLC1A1", "KCNN2", "PTEN", "ITSN1", "PLCB2", "KCNQ3", "KCNJ5", "STX12", "RPS6KA1", "AP2S1", "ADCY1", "SYPL1", "GABRB3", "GRIK3", "PICK1", "CACNB3", "CACNA1E"…
556	REGULATION OF PROTEIN LOCALIZATION%GO%GO:0032880	3.04106e-07	1.80604e-06	0.674963	0.343955	2.19918	132	c("BMP7", "WNK3", "SRGN", "CSF1R", "HCLS1", "TLR4", "LCP1", "NKD2", "RHBDF2", "TLR2", "NOD2", "DAB2", "PPP2R5A", "AXIN2", "PID1", "FGR", "BCL2L1", "BCL3", "IL10", "SNAI2", "PICALM", "NDFIP2", "SPHK1", "WNT5A", "HYAL2", "CABP1", "SYTL4", "PYCARD", "PDE2A", "RANGAP1", "GPM6B", "NFKBIA", "DPH3", "UHMK1", "SFRP5", "CD274", "EXPH5", "TXN", "NR1H3", "DNAJC1", "ECT2", "NLRP3", "ACSL3", "CSK", "PPIA", "A…
557	CELL MORPHOGENESIS INVOLVED IN NEURON DIFFERENTIATION%GO%GO:0048667	3.07742e-07	1.82435e-06	0.674963	0.332369	2.19067	165	c("TYROBP", "CHL1", "ITGA5", "SDCBP", "ITGA2", "RTN4RL1", "ABLIM3", "RPS6KA2", "CLTC", "WNT5A", "GRB2", "ACTG1", "PLXNB1", "FES", "COL4A4", "NTN1", "CAP1", "FZD5", "MAP2K1", "STIP1", "TRIO", "COL5A1", "PTEN", "RHOB", "ITGB1", "COL6A3", "RAB8A", "MYL6", "KCNQ3", "MET", "BAIAP2", "ITGB3", "HSP90AA1", "RPS6KA1", "PARD3", "PAK2", "CFL1", "CSNK2A1", "AP2S1", "RAC2", "ALCAM", "TUBB3", "CACNB3", "SLIT3"…
558	ASPARAGINE N-LINKED GLYCOSYLATION%REACTOME%REACT_22426.3	3.15317e-07	1.86591e-06	0.674963	0.456013	2.51418	59	c("GFPT2", "ALG3", "RPN1", "MCFD2", "EDEM2", "GNPNAT1", "B4GALT6", "MGAT4A", "PMM2", "RPN2", "ALG8", "MAN1A1", "ALG5", "SEC24D", "B4GALT3", "DDOST", "MAN2A2", "GMPPB", "MGAT1", "CALR", "PGM3", "B4GALT1", "GANAB", "DAD1", "LMAN1", "ST3GAL4", "B4GALT5", "MGAT2", "STT3A", "DPAGT1", "MAN2A1", "EDEM3", "SEC23A", "SEC24A", "ALG2", "DOLPP1", "EDEM1", "RFT1", "ALG1", "ALG9", "ALG13", "SEC24C")
559	REGULATION OF PURINE NUCLEOTIDE METABOLIC PROCESS%GO%GO:1900542	3.16865e-07	1.87172e-06	0.674963	0.343599	2.19691	132	c("MYH6", "CCL11", "FGD2", "NCKAP1L", "PLSCR1", "MYL4", "CCL21", "GABBR2", "RAMP1", "PREX1", "AXIN2", "TBC1D2", "PID1", "RGS19", "RGS10", "UHRF1", "MYL3", "RAP1GAP", "WNT5A", "RGS1", "PLXNB1", "CAP1", "MYBPC3", "ERRFI1", "CDC42EP2", "PDE2A", "RGS2", "RANGAP1", "EDNRB", "ADAP2", "IQGAP1", "TMED2", "OCRL", "ARHGAP4", "ARHGAP9", "SH3BP4", "FGD3", "DNAJC1", "AKAP12", "ECT2", "GPR161", "AHSA1", "ADORA…
560	MRNA CATABOLIC PROCESS%GO%GO:0006402	3.21441e-07	1.89144e-06	0.674963	0.361457	2.27052	118	c("RPS27", "EIF4G1", "HSPA1B", "EIF4A1", "RPLP0", "RPS19", "ZFP36", "EXOSC4", "RPL34", "TNKS1BP1", "RPL27A", "RPS5", "RPL29", "RPL18", "RPS18", "RPL24", "RPL13", "ETF1", "RPS17", "RPS3", "RPL35", "RPS15A", "RPS2", "LSM6", "MAGOH", "RPS28", "RPSA", "RPL41", "RPLP2", "RPL18A", "RPS10", "RPL12", "RPS9", "RPL36A", "RPS6", "RPL21", "RPL28", "RPL26", "RPS12", "GSPT1", "RPL37A", "RPL38", "RPL10A", "LSM7…
561	ER-NUCLEUS SIGNALING PATHWAY%GO%GO:0006984	3.21706e-07	1.89144e-06	0.674963	0.449899	2.49546	60	c("CCL2", "ATF3", "TSPYL2", "ATF4", "ASNS", "SRPRB", "XBP1", "DNAJB9", "ADD1", "DERL1", "LMNA", "HDGF", "ATF6", "DNAJC3", "HSP90B1", "SSR1", "KLHDC3", "SERP1", "PTPN1", "CALR", "WFS1", "SHC1", "FKBP14", "PDIA6", "ACADVL", "CXXC1", "VCP", "EIF2S1", "DERL2", "HERPUD1", "HYOU1", "EDEM1", "SCAP", "HSPA5", "YIF1A", "AMFR", "ATP6V0D1", "DNAJB11", "CREB3", "PDIA5", "ZBTB17", "PREB", "GOSR2", "PLA2G4B", …
562	CDK-MEDIATED PHOSPHORYLATION AND REMOVAL OF CDC6%REACTOME%REACT_1221.3	3.22495e-07	1.89144e-06	0.674963	0.545139	2.59637	33	c("CDK2", "PSME2", "PSMD8", "PSMB8", "PSME4", "PSMA4", "PSME1", "PSMA6", "PSMB6", "PSMD14", "PSMA3", "PSMD2", "PSMA5", "PSMD12", "PSMD13", "PSME3", "PSMB3", "PSMB5", "UBA52", "PSMC3", "PSMB9", "PSMB1", "PSMA7", "PSMD9", "PSMC4", "PSMD3", "PSMC5")
563	VPU MEDIATED DEGRADATION OF CD4%REACTOME%REACT_9031.1	3.22495e-07	1.89144e-06	0.674963	0.545106	2.59621	33	c("PSME2", "CD4", "PSMD8", "PSMB8", "PSME4", "PSMA4", "PSME1", "PSMA6", "PSMB6", "PSMD14", "PSMA3", "PSMD2", "PSMA5", "PSMD12", "PSMD13", "PSME3", "PSMB3", "PSMB5", "UBA52", "PSMC3", "PSMB9", "PSMB1", "PSMA7", "PSMD9", "PSMC4", "PSMD3", "PSMC5")
564	CDT1 ASSOCIATION WITH THE CDC6:ORC:ORIGIN COMPLEX%REACTOME%REACT_1949.4	3.26363e-07	1.91073e-06	0.674963	0.533873	2.60882	36	c("PSME2", "PSMD8", "PSMB8", "PSME4", "PSMA4", "PSME1", "PSMA6", "PSMB6", "PSMD14", "PSMA3", "PSMD2", "MCM8", "PSMA5", "PSMD12", "GMNN", "PSMD13", "PSME3", "PSMB3", "CDT1", "PSMB5", "UBA52", "PSMC3", "PSMB9", "PSMB1", "PSMA7", "PSMD9", "PSMC4", "PSMD3", "PSMC5")
565	REGULATION OF ACTIVATED PAK-2P34 BY PROTEASOME MEDIATED DEGRADATION%REACTOME%REACT_13464.2	3.2707e-07	1.91148e-06	0.674963	0.544671	2.59414	33	c("PSME2", "PSMD8", "PSMB8", "PSME4", "PSMA4", "PSME1", "PSMA6", "PAK2", "PSMB6", "PSMD14", "PSMA3", "PSMD2", "PSMA5", "PSMD12", "PSMD13", "PSME3", "PSMB3", "PSMB5", "UBA52", "PSMC3", "PSMB9", "PSMB1", "PSMA7", "PSMD9", "PSMC4", "PSMD3", "PSMC5")
566	REGULATION OF ENDOCYTOSIS%GO%GO:0030100	3.3011e-07	1.92583e-06	0.674963	0.515213	2.63602	43	c("CCL2", "SYK", "DOCK2", "NCKAP1L", "SLC11A1", "CCL21", "SELE", "DAB2", "SERPINE1", "FGR", "MERTK", "PICALM", "PYCARD", "NR1H2", "LRSAM1", "CAMK1D", "AP2S1", "GATA2", "NR1H3", "ANGPT1", "HCK", "PTPN1", "CALR", "PPT1", "LILRB1", "ADIPOQ", "DKK1", "SNX17", "ABL1")
567	PHOSPHORYLATION%GO%GO:0016310	3.32544e-07	1.93661e-06	0.674963	0.276013	1.92922	304	c("CCL2", "CCL11", "FPR1", "SYK", "PDGFRA", "TGFA", "PIM1", "MAP3K8", "WNK3", "CSF1R", "TLR4", "GRK5", "EFEMP1", "ACVRL1", "TGFBR3", "TLR2", "BTK", "MAP3K6", "IRAK1", "THBS1", "TGFBR2", "PRKCD", "NOD2", "NGF", "CDK2", "DCLK1", "WNK1", "FGR", "C5AR1", "RUNX3", "MERTK", "STK17B", "CDK6", "TYRO3", "PDK4", "WNT5A", "IRAK3", "UGP2", "FES", "MUSK", "AURKA", "HIPK2", "RARA", "JAK1", "MAP2K1", "TEK", "PR…
568	NEGATIVE REGULATION OF TRANSCRIPTION FROM RNA POLYMERASE II PROMOTER%GO%GO:0000122	3.3321e-07	1.93707e-06	0.674963	0.337251	2.19995	153	c("OSR1", "HEY2", "ENO1", "IRF8", "BCL6", "PPARG", "LRP8", "MYC", "STAT3", "EDN1", "TCF21", "TGIF1", "NRIP1", "SPI1", "RUNX3", "PER1", "SNAI2", "UHRF1", "ZFP36", "PAWR", "USP2", "ZNF593", "SOX11", "ELK4", "UBE2D3", "NKX2-5", "IFI16", "HDGF", "PDE2A", "EDNRB", "ZNF189", "CAV1", "SMARCA4", "GLIS3", "RXRA", "NR2F6", "NR1H3", "NOTCH1", "NFKB1", "YY1", "CALR", "CITED2", "MED25", "HSBP1", "MAD2L2", "ZN…
569	REMOVAL OF LICENSING FACTORS FROM ORIGINS%REACTOME%REACT_207.3	3.35592e-07	1.9475e-06	0.674963	0.514734	2.59464	41	c("CDKN1A", "CDK2", "PSME2", "PSMD8", "PSMB8", "PSME4", "PSMA4", "PSME1", "PSMA6", "PSMB6", "PSMD14", "PSMA3", "PSMD2", "MCM8", "PSMA5", "PSMD12", "GMNN", "PSMD13", "PSME3", "PSMB3", "CDT1", "MCM10", "PSMB5", "UBA52", "PSMC3", "PSMB9", "PSMB1", "PSMA7", "PSMD9", "PSMC4", "PSMD3", "PSMC5", "MCM5")
570	NEGATIVE REGULATION OF DEVELOPMENTAL PROCESS%GO%GO:0051093	3.37792e-07	1.95683e-06	0.674963	0.333342	2.16327	148	c("HOPX", "BMP7", "MEIS1", "MAFB", "OSR1", "HEY2", "SRGN", "CCR1", "PPARG", "MYC", "TLR4", "C1QC", "EFEMP1", "ABCG1", "THBS1", "STAB1", "SERPINE1", "AXIN2", "IRF1", "CDK6", "SNAI2", "ZBTB16", "NGFR", "WNT5A", "CST3", "RARA", "SOX11", "NKX2-5", "TEK", "NR1H2", "PTEN", "LILRB4", "EDNRB", "NFKBIA", "YWHAH", "CAV1", "ECM1", "ITGB3", "CHRD", "GATA2", "NR1H3", "NOTCH1", "ARHGDIA", "CALR", "SIRT2", "DLL…
571	VIF-MEDIATED DEGRADATION OF APOBEC3G%REACTOME%REACT_9453.2	3.40793e-07	1.97075e-06	0.674963	0.544297	2.59236	33	c("PSME2", "PSMD8", "PSMB8", "PSME4", "PSMA4", "PSME1", "PSMA6", "PSMB6", "PSMD14", "PSMA3", "PSMD2", "PSMA5", "PSMD12", "PSMD13", "PSME3", "TCEB1", "PSMB3", "PSMB5", "UBA52", "PSMC3", "PSMB9", "PSMB1", "PSMA7", "PSMD9", "PSMC4", "PSMD3", "PSMC5")
572	BLOOD VESSEL MORPHOGENESIS%GO%GO:0048514	3.64381e-07	2.10347e-06	0.674963	0.393127	2.33964	85	c("CCL2", "SYK", "PDGFRA", "HEY2", "HMOX1", "ACVRL1", "TCF21", "THBS1", "TGFBR2", "ITGA5", "ANXA2", "RAMP1", "SERPINE1", "TGFBI", "SAT1", "ENPEP", "FZD5", "NKX2-5", "TEK", "PARVA", "JMJD6", "CAV1", "ITGB3", "PDGFRB", "WNT5B", "NOTCH1", "ANGPT1", "LRP1", "FLT1", "NR4A1", "EPHB4", "ANG", "SRPK2", "ENG", "RBPJ", "CCM2", "ID1", "SLIT2", "SOX18", "CEACAM1", "PROK2", "PRKX", "CCBE1", "BMPER", "IL18", "…
573	ASSEMBLY OF THE PRE-REPLICATIVE COMPLEX%REACTOME%REACT_2243.4	3.95144e-07	2.27525e-06	0.674963	0.518723	2.57455	39	c("PSME2", "PSMD8", "PSMB8", "PSME4", "PSMA4", "PSME1", "PSMA6", "PSMB6", "PSMD14", "PSMA3", "PSMD2", "E2F3", "MCM8", "PSMA5", "PSMD12", "GMNN", "PSMD13", "PSME3", "PSMB3", "CDT1", "PSMB5", "UBA52", "PSMC3", "PSMB9", "PSMB1", "PSMA7", "PSMD9", "PSMC4", "PSMD3", "PSMC5", "MCM5", "E2F2")
574	CELLULAR RESPONSE TO PEPTIDE HORMONE STIMULUS%GO%GO:0071375	3.96204e-07	2.27525e-06	0.674963	0.377154	2.2839	96	c("NAMPT", "SOCS3", "FGF7", "EIF4EBP1", "PPARG", "STAT3", "ADCY3", "PRKAR2A", "SOCS1", "EIF4G1", "MYO5A", "PDK4", "GRB2", "GNG12", "ATP6V1A", "MAP2K1", "CAB39L", "EEF2K", "BAIAP2", "ATP6V0A2", "STRADB", "LYN", "ADCY1", "RPS6", "PTPN1", "ATP6V0A1", "ATP6V1F", "IRS2", "TCIRG1", "NRAS", "PRKAG1", "DOK1", "ATP6V0C", "PRKCI", "SHC1", "FOXO3", "ADIPOQ", "MAP2K2", "RHEB", "ADCY7", "YWHAB", "PTPN6", "SOS…
575	CELLULAR RESPONSE TO PEPTIDE%GO%GO:1901653	3.96204e-07	2.27525e-06	0.674963	0.377154	2.2839	96	c("NAMPT", "SOCS3", "FGF7", "EIF4EBP1", "PPARG", "STAT3", "ADCY3", "PRKAR2A", "SOCS1", "EIF4G1", "MYO5A", "PDK4", "GRB2", "GNG12", "ATP6V1A", "MAP2K1", "CAB39L", "EEF2K", "BAIAP2", "ATP6V0A2", "STRADB", "LYN", "ADCY1", "RPS6", "PTPN1", "ATP6V0A1", "ATP6V1F", "IRS2", "TCIRG1", "NRAS", "PRKAG1", "DOK1", "ATP6V0C", "PRKCI", "SHC1", "FOXO3", "ADIPOQ", "MAP2K2", "RHEB", "ADCY7", "YWHAB", "PTPN6", "SOS…
576	PURINE-CONTAINING COMPOUND METABOLIC PROCESS%GO%GO:0072521	4.22347e-07	2.42117e-06	0.674963	0.335112	2.18414	152	c("MYH6", "BLM", "GNMT", "PDE4D", "RHOD", "SHMT1", "ADA", "GNL3", "ALDOA", "DDX3X", "PAPSS2", "EIF5", "RAB8B", "RAP1GAP", "SLC25A13", "ACLY", "EFTUD2", "DPYD", "PAICS", "GPX1", "PDE2A", "ABCD3", "RHOB", "BAD", "ATL3", "GNL2", "NCF1", "MSH6", "PPAT", "IMPDH1", "SLC2A9", "HSP90AA1", "RHOF", "GART", "NADK", "RAB5A", "HINT1", "ADSS", "ATL2", "ADCY1", "DGUOK", "APRT", "RAB9A", "RAB38", "GSPT1", "STOML…
577	SIGNALING BY FGFR%REACTOME%REACT_9470.8	4.2705e-07	2.44388e-06	0.674963	0.41895	2.39271	68	c("FGF7", "PDGFRA", "CDKN1A", "ADCY3", "CD86", "IL6R", "PRKAR2A", "PIK3R3", "PRKCD", "JAK1", "MAP2K1", "PPP2CB", "PTEN", "BAD", "RPS6KB2", "ITPR3", "PDGFRB", "ADCY1", "NR4A1", "IRS2", "NRAS", "CHUK", "CALM2", "ERBB2", "FOXO3", "MAP2K2", "IL6", "ADCY7", "YWHAB", "SOS1", "KRAS", "UBA52", "RAF1", "KLB", "VAV1", "PRKCE", "MAPKAP1", "CALM3", "MDM2", "PDE1B", "ADCY9", "TRIB3", "SPRY2", "CREB1", "EREG",…
578	REGULATION OF CELLULAR KETONE METABOLIC PROCESS%GO%GO:0010565	4.33877e-07	2.47865e-06	0.674963	0.419866	2.45237	75	c("MID1IP1", "NQO1", "PSME2", "PSMD8", "ACACB", "PDK4", "PSMB8", "AKR1C3", "NR1H2", "FBP1", "CAB39L", "CAV1", "PSME4", "PSMA4", "PSME1", "PSMA6", "PSMB6", "STRADB", "NR1H3", "PSMD14", "PSMA3", "IRS2", "PSMD2", "PRKAG1", "MLXIPL", "PSMA5", "PSMD12", "ADIPOQ", "ACADVL", "OAZ1", "PSMD13", "PSME3", "PTGS2", "PSMB3", "BMP2", "CAB39", "PSMB5", "BMP5", "PRKCE", "PSMC3", "PSMB9", "PSMB1", "PSMA7", "PSMD9…
579	Proteasome%KEGG%hsa03050	4.47217e-07	2.55045e-06	0.674963	0.573345	2.62667	29	c("PSME2", "PSMD8", "PSMB8", "PSME4", "PSMA4", "POMP", "PSME1", "PSMA6", "PSMB6", "PSMD14", "PSMA3", "PSMD2", "PSMA5", "PSMD12", "PSMD13", "PSME3", "PSMB3", "PSMB5", "PSMC3", "PSMB9", "PSMB1", "PSMA7", "PSMC4", "PSMD3", "PSMC5")
580	PHAGOCYTOSIS%GO%GO:0006909	4.48197e-07	2.55163e-06	0.674963	0.570511	2.59066	28	c("TGM2", "SLC11A1", "THBS1", "MERTK", "AXL", "TYRO3", "AIF1", "CORO1C", "CLEC7A", "CORO1A", "ANXA3", "RARA", "CD302", "RAB34", "CD14", "NR1H3", "LRP1", "FCN1")
581	Regulation of actin cytoskeleton%KEGG%hsa04810	4.49248e-07	2.55321e-06	0.674963	0.359304	2.25699	118	c("FGF7", "WAS", "PDGFRA", "FGF12", "NCKAP1L", "ITGA11", "PIK3R3", "ITGAM", "ITGA5", "ITGA2", "PPP1CC", "ITGA7", "ITGB2", "ACTG1", "ITGA3", "GNG12", "MAP2K1", "GNA13", "PPP1CA", "ARPC1B", "ITGB1", "ARPC3", "SLC9A1", "IQGAP1", "ARPC5", "PIK3R5", "SSH2", "ARPC4", "FN1", "CD14", "BAIAP2", "ITGB3", "PAK2", "PDGFRB", "CFL1", "TIAM1", "FGF11", "RAC2", "FGD3", "NCKAP1", "CSK", "ARPC5L", "NRAS", "ARPC2",…
582	HYDROLASE ACTIVITY, ACTING ON ACID ANHYDRIDES%GO%GO:0016817	4.55518e-07	2.57555e-06	0.674963	0.317042	2.11229	180	c("MYH6", "ATP2A2", "BLM", "ATP1A1", "NUDT4", "RHOD", "ABCG1", "GNL3", "GNAO1", "DDX3X", "MYO5A", "EIF5", "PPA2", "RAB8B", "RAP1GAP", "EIF4A1", "DDX23", "ABCB6", "TAP1", "GNA13", "ABCD3", "RHOB", "PPA1", "ATL3", "TTF2", "GNL2", "NCF1", "ALPL", "MYL6", "MSH6", "CHD1", "DHX9", "KATNB1", "MYO1B", "SMARCA4", "DDX56", "HSP90AA1", "DHX15", "RHOF", "NUDT5", "RAB5A", "KIF2A", "ATL2", "CENPE", "RAB27A", "…
583	HYDROLASE ACTIVITY, ACTING ON ACID ANHYDRIDES, IN PHOSPHORUS-CONTAINING ANHYDRIDES%GO%GO:0016818	4.55518e-07	2.57555e-06	0.674963	0.317042	2.11229	180	c("MYH6", "ATP2A2", "BLM", "ATP1A1", "NUDT4", "RHOD", "ABCG1", "GNL3", "GNAO1", "DDX3X", "MYO5A", "EIF5", "PPA2", "RAB8B", "RAP1GAP", "EIF4A1", "DDX23", "ABCB6", "TAP1", "GNA13", "ABCD3", "RHOB", "PPA1", "ATL3", "TTF2", "GNL2", "NCF1", "ALPL", "MYL6", "MSH6", "CHD1", "DHX9", "KATNB1", "MYO1B", "SMARCA4", "DDX56", "HSP90AA1", "DHX15", "RHOF", "NUDT5", "RAB5A", "KIF2A", "ATL2", "CENPE", "RAB27A", "…
584	PYROPHOSPHATASE ACTIVITY%GO%GO:0016462	4.55518e-07	2.57555e-06	0.674963	0.317042	2.11229	180	c("MYH6", "ATP2A2", "BLM", "ATP1A1", "NUDT4", "RHOD", "ABCG1", "GNL3", "GNAO1", "DDX3X", "MYO5A", "EIF5", "PPA2", "RAB8B", "RAP1GAP", "EIF4A1", "DDX23", "ABCB6", "TAP1", "GNA13", "ABCD3", "RHOB", "PPA1", "ATL3", "TTF2", "GNL2", "NCF1", "ALPL", "MYL6", "MSH6", "CHD1", "DHX9", "KATNB1", "MYO1B", "SMARCA4", "DDX56", "HSP90AA1", "DHX15", "RHOF", "NUDT5", "RAB5A", "KIF2A", "ATL2", "CENPE", "RAB27A", "…
585	Insulin signaling pathway%KEGG%hsa04910	4.60115e-07	2.59709e-06	0.674963	0.411323	2.40761	77	c("HK2", "SOCS3", "HK3", "EIF4EBP1", "SREBF1", "PRKAR2A", "PIK3R3", "SOCS1", "FASN", "ACACB", "CBLB", "PPP1CC", "GRB2", "MAP2K1", "FBP1", "PPP1CA", "PYGL", "BAD", "RPS6KB2", "PIK3R5", "ELK1", "RPS6", "PHKG2", "INPP5D", "PTPN1", "IRS2", "NRAS", "PRKAG1", "PRKCI", "PDE3A", "MKNK2", "SHC1", "CALM2", "PCK2", "MAP2K2", "RHEB", "SOS1", "KRAS", "HK1", "CRKL", "MAPK9", "PRKX", "RAF1", "ARAF", "CALM3", "E…
586	PHAGOCYTIC VESICLE%GO%GO:0045335	4.68535e-07	2.64011e-06	0.674963	0.493435	2.50599	42	c("SYK", "SLC11A1", "CYBB", "CYBA", "B2M", "UNC93B1", "RAB8B", "CORO1A", "ANXA3", "RAB32", "NCF4", "RAB8A", "NCF1", "RAB34", "STX12", "HLA-E", "LTF", "ATP6V0A2", "RAB9A", "ATP6V0A1", "RAB38", "HLA-A", "TCIRG1", "ATP6V0C", "NCF2", "HLA-B", "RAB11A", "ATP6V0B", "VAMP7", "ATP6V0D1", "ANXA11", "HLA-F", "ITGB5", "FMNL1", "HLA-C", "RAB22A")
587	DEGRADATION OF BETA-CATENIN BY THE DESTRUCTION COMPLEX%REACTOME%REACT_11063.1	4.75506e-07	2.67027e-06	0.674963	0.519453	2.56206	38	c("PPP2R5A", "PSME2", "PSMD8", "PSMB8", "PPP2CB", "CSNK1A1", "PSME4", "PSMA4", "PSME1", "PSMA6", "PSMB6", "PSMD14", "PSMA3", "PSMD2", "PSMA5", "PSMD12", "PSMD13", "PSME3", "PSMB3", "PSMB5", "UBA52", "PSMC3", "PSMB9", "PSMB1", "PSMA7", "PSMD9", "PSMC4", "PSMD3", "AXIN1", "PSMC5")
588	SIGNALING BY WNT%REACTOME%REACT_11045.2	4.75506e-07	2.67027e-06	0.674963	0.519453	2.56206	38	c("PPP2R5A", "PSME2", "PSMD8", "PSMB8", "PPP2CB", "CSNK1A1", "PSME4", "PSMA4", "PSME1", "PSMA6", "PSMB6", "PSMD14", "PSMA3", "PSMD2", "PSMA5", "PSMD12", "PSMD13", "PSME3", "PSMB3", "PSMB5", "UBA52", "PSMC3", "PSMB9", "PSMB1", "PSMA7", "PSMD9", "PSMC4", "PSMD3", "AXIN1", "PSMC5")
589	DAP12 SIGNALING%REACTOME%REACT_147814.2	4.77797e-07	2.67858e-06	0.659444	0.4154	2.41917	74	c("FGF7", "SYK", "PDGFRA", "TYROBP", "CDKN1A", "ADCY3", "BTK", "CD86", "IL6R", "PRKAR2A", "PIK3R3", "PRKCD", "B2M", "JAK1", "MAP2K1", "PTEN", "BAD", "RPS6KB2", "ITPR3", "LCP2", "HLA-E", "PDGFRB", "ADCY1", "NR4A1", "IRS2", "NRAS", "CHUK", "CALM2", "ERBB2", "FOXO3", "MAP2K2", "IL6", "ADCY7", "YWHAB", "SOS1", "KRAS", "RAF1", "KLB", "VAV1", "PRKCE", "MAPKAP1", "CALM3", "MDM2", "PDE1B", "ADCY9", "TRIB…
590	COATED VESICLE MEMBRANE%GO%GO:0030662	4.89161e-07	2.73765e-06	0.659444	0.459013	2.48738	55	c("APOB", "HLA-DRA", "MCFD2", "TMED3", "B2M", "PICALM", "CLTC", "NCALD", "CD74", "HLA-DPA1", "SEC24D", "HLA-DRB4", "HLA-E", "ICA1", "HLA-DPB1", "AP2S1", "HLA-A", "AP1G1", "COPB2", "HLA-B", "DNAJC5", "FCGR1A", "NECAP2", "LMAN1", "LDLR", "CLTA", "COPZ1", "FCGR1B", "HSPA8", "SEC23A", "SEC24A", "HLA-DRB3", "COPE", "SCYL1", "ARCN1", "AP2A2")
591	ACTIVATION OF SIGNALING PROTEIN ACTIVITY INVOLVED IN UNFOLDED PROTEIN RESPONSE%GO%GO:0006987	4.9849e-07	2.78043e-06	0.659444	0.465429	2.46647	49	c("CCL2", "ATF3", "TSPYL2", "ATF4", "ASNS", "SRPRB", "XBP1", "DNAJB9", "ADD1", "LMNA", "HDGF", "ATF6", "DNAJC3", "HSP90B1", "SSR1", "KLHDC3", "SERP1", "CALR", "WFS1", "SHC1", "FKBP14", "PDIA6", "ACADVL", "CXXC1", "EIF2S1", "HERPUD1", "HYOU1", "EDEM1", "HSPA5", "YIF1A", "ATP6V0D1", "DNAJB11", "PDIA5", "ZBTB17", "PREB", "GOSR2", "PLA2G4B", "C19ORF10", "IL8", "TLN1", "ARFGAP1", "TATDN2")
592	POSITIVE REGULATION OF NUCLEASE ACTIVITY%GO%GO:0032075	4.9849e-07	2.78043e-06	0.659444	0.465429	2.46647	49	c("CCL2", "ATF3", "TSPYL2", "ATF4", "ASNS", "SRPRB", "XBP1", "DNAJB9", "ADD1", "LMNA", "HDGF", "ATF6", "DNAJC3", "HSP90B1", "SSR1", "KLHDC3", "SERP1", "CALR", "WFS1", "SHC1", "FKBP14", "PDIA6", "ACADVL", "CXXC1", "EIF2S1", "HERPUD1", "HYOU1", "EDEM1", "HSPA5", "YIF1A", "ATP6V0D1", "DNAJB11", "PDIA5", "ZBTB17", "PREB", "GOSR2", "PLA2G4B", "C19ORF10", "IL8", "TLN1", "ARFGAP1", "TATDN2")
593	NEGATIVE REGULATION OF PHOSPHATE METABOLIC PROCESS%GO%GO:0045936	5.00589e-07	2.78274e-06	0.659444	0.372637	2.29973	106	c("BMP7", "SOCS3", "CDKN1A", "SAMSN1", "PLEK", "DDIT4", "PRKCD", "DUSP2", "SOCS1", "GABBR2", "DUSP1", "PID1", "MVP", "DBNDD2", "NF2", "IRAK3", "HYAL2", "ERRFI1", "PYCARD", "GMFG", "PDE2A", "PTEN", "RGS2", "EDNRB", "DNAJC3", "CAV1", "GSTP1", "GMFB", "DUSP5", "PAK2", "LYN", "DUSP7", "SNX6", "ZGPAT", "CDKN2D", "MLXIPL", "CDKN1C", "ENG", "ADIPOQ", "INHA", "GNAI2", "YWHAB", "DKK1", "PTPN6", "SLIT2", "…
594	NEGATIVE REGULATION OF PHOSPHORUS METABOLIC PROCESS%GO%GO:0010563	5.00589e-07	2.78274e-06	0.659444	0.372637	2.29973	106	c("BMP7", "SOCS3", "CDKN1A", "SAMSN1", "PLEK", "DDIT4", "PRKCD", "DUSP2", "SOCS1", "GABBR2", "DUSP1", "PID1", "MVP", "DBNDD2", "NF2", "IRAK3", "HYAL2", "ERRFI1", "PYCARD", "GMFG", "PDE2A", "PTEN", "RGS2", "EDNRB", "DNAJC3", "CAV1", "GSTP1", "GMFB", "DUSP5", "PAK2", "LYN", "DUSP7", "SNX6", "ZGPAT", "CDKN2D", "MLXIPL", "CDKN1C", "ENG", "ADIPOQ", "INHA", "GNAI2", "YWHAB", "DKK1", "PTPN6", "SLIT2", "…
595	NEGATIVE REGULATION OF PHOSPHORYLATION%GO%GO:0042326	5.11199e-07	2.83694e-06	0.659444	0.381266	2.2896	91	c("BMP7", "SOCS3", "CDKN1A", "SAMSN1", "DDIT4", "PRKCD", "DUSP2", "SOCS1", "DUSP1", "PID1", "MVP", "DBNDD2", "NF2", "IRAK3", "HYAL2", "ERRFI1", "PYCARD", "GMFG", "PTEN", "RGS2", "DNAJC3", "CAV1", "GSTP1", "GMFB", "DUSP5", "PAK2", "LYN", "DUSP7", "SNX6", "ZGPAT", "CDKN2D", "MLXIPL", "CDKN1C", "ENG", "ADIPOQ", "INHA", "DKK1", "PTPN6", "SLIT2", "ABL1", "ADAR", "GPS2", "TRIM27", "IL1B", "STK38", "SEM…
596	Bacterial invasion of epithelial cells%KEGG%hsa05100	5.15602e-07	2.85657e-06	0.659444	0.482319	2.51618	46	c("WAS", "HCLS1", "PIK3R3", "ITGA5", "CLTC", "CBLB", "ACTG1", "ARPC1B", "ITGB1", "ARPC3", "CAV1", "ARPC5", "MET", "PIK3R5", "ARPC4", "FN1", "CAV2", "ARPC5L", "ARPC2", "MAD2L2", "CDC42", "SHC1", "ACTB", "CTTN", "RHOA", "DNM2", "CLTA", "RHOG", "CLTB", "CRKL", "BCAR1")
597	CARDIOVASCULAR SYSTEM DEVELOPMENT%GO%GO:0072358	5.57688e-07	3.07941e-06	0.659444	0.31812	2.10625	170	c("CCL2", "MYH6", "SYK", "PDGFRA", "FGF12", "OSR1", "HEY2", "PDPN", "HMOX1", "ACVRL1", "TGFBR3", "TCF21", "THBS1", "TGFBR2", "ITGA5", "ANXA2", "RAMP1", "SERPINE1", "TGFBI", "SAT1", "SNAI2", "MYL3", "ECE2", "WNT5A", "ANGPT2", "MYBPC3", "ERRFI1", "ENPEP", "SOX11", "FZD5", "NKX2-5", "TEK", "ACTA2", "PARVA", "PTEN", "JMJD6", "ADAP2", "CAV1", "FBN1", "SFRP5", "ITGB3", "PDGFRB", "WNT5B", "NOTCH1", "ANG…
598	CIRCULATORY SYSTEM DEVELOPMENT%GO%GO:0072359	5.57688e-07	3.07941e-06	0.659444	0.31812	2.10625	170	c("CCL2", "MYH6", "SYK", "PDGFRA", "FGF12", "OSR1", "HEY2", "PDPN", "HMOX1", "ACVRL1", "TGFBR3", "TCF21", "THBS1", "TGFBR2", "ITGA5", "ANXA2", "RAMP1", "SERPINE1", "TGFBI", "SAT1", "SNAI2", "MYL3", "ECE2", "WNT5A", "ANGPT2", "MYBPC3", "ERRFI1", "ENPEP", "SOX11", "FZD5", "NKX2-5", "TEK", "ACTA2", "PARVA", "PTEN", "JMJD6", "ADAP2", "CAV1", "FBN1", "SFRP5", "ITGB3", "PDGFRB", "WNT5B", "NOTCH1", "ANG…
599	REGULATION OF PHAGOCYTOSIS%GO%GO:0050764	5.64462e-07	3.11161e-06	0.659444	0.696744	2.60724	15	c("CCL2", "SYK", "DOCK2", "NCKAP1L", "SLC11A1", "FGR", "MERTK", "PYCARD", "CAMK1D", "GATA2", "HCK", "CALR", "ADIPOQ")
600	SEPARATION OF SISTER CHROMATIDS%REACTOME%REACT_150471.2	5.70189e-07	3.13794e-06	0.659444	0.391554	2.33942	87	c("RPS27", "PPP2R5A", "PSME2", "PSMD8", "PPP1CC", "PSMB8", "PPP2CB", "CLIP1", "AHCTF1", "RANGAP1", "SPC24", "PSME4", "PSMA4", "PSME1", "PSMA6", "PSMB6", "KIF2A", "CENPE", "PSMD14", "PSMA3", "NDEL1", "ANAPC7", "PSMD2", "B9D2", "PSMA5", "PSMD12", "NUDC", "PSMD13", "ZW10", "ANAPC5", "PSME3", "BIRC5", "PTTG1", "CENPO", "PSMB3", "KNTC1", "CENPN", "NUP85", "PSMB5", "UBA52", "PSMC3", "PSMB9", "PSMB1", "…
601	MYELOID LEUKOCYTE ACTIVATION%GO%GO:0002274	5.78997e-07	3.18095e-06	0.659444	0.54958	2.57011	31	c("SYK", "DOCK2", "SLC11A1", "TLR4", "TGFBR2", "STXBP2", "PRKCD", "PREX1", "AIF1", "ANXA3", "HYAL2", "BATF3", "PYCARD", "S100A12", "SBNO2", "TLR1", "MT1G", "CSF1")
602	SIGNALING BY EGFR IN CANCER%REACTOME%REACT_115871.4	5.7993e-07	3.18095e-06	0.659444	0.393872	2.3554	88	c("FGF7", "PDGFRA", "CDKN1A", "ADCY3", "CD86", "IL6R", "PRKAR2A", "PIK3R3", "PRKCD", "SH3KBP1", "EPN1", "JAK1", "MAP2K1", "PTEN", "BAD", "RPS6KB2", "ITPR3", "HSP90AA1", "PDGFRB", "AP2S1", "ADCY1", "NR4A1", "IRS2", "CSK", "NRAS", "CHUK", "SPRY1", "CDC42", "SHC1", "CALM2", "ERBB2", "FOXO3", "MAP2K2", "IL6", "ADCY7", "CLTA", "YWHAB", "SOS1", "KRAS", "UBA52", "AP2A2", "RAF1", "KLB", "VAV1", "PRKCE", …
603	CELLULAR HOMEOSTASIS%GO%GO:0019725	5.8323e-07	3.19374e-06	0.659444	0.306613	2.0639	196	c("CCL2", "HK2", "ATP2A2", "CCL11", "S1PR3", "S100A9", "HK3", "PDGFRA", "GLRX2", "SLC11A1", "S100A8", "CCR1", "MYC", "HMOX1", "EDN1", "C3AR1", "SCARA5", "TFRC", "CCL21", "SLC4A3", "EPB41L3", "ALDOA", "SLC39A14", "AGTR1", "PID1", "BCL2L1", "P2RY2", "STEAP3", "TYRO3", "GNA15", "SLC11A2", "MT2A", "CD55", "LPAR1", "ABCB6", "MAL", "ATP6V1A", "GPX1", "GPR89B", "PTEN", "FTL", "BAD", "SLC9A1", "CCL8", "C…
604	REGULATION OF LIGASE ACTIVITY%GO%GO:0051340	6.00014e-07	3.28021e-06	0.659444	0.454366	2.49087	57	c("MID1IP1", "XRCC4", "CDK2", "PSME2", "PSMD8", "PSMB8", "PTEN", "PSME4", "PSMA4", "PSME1", "PSMA6", "PSMB6", "PSMD14", "PSMA3", "FEM1A", "FEM1B", "ANAPC7", "PSMD2", "MAD2L2", "PSMA5", "PSMD12", "FBXO5", "PSMD13", "ANAPC5", "PSME3", "PSMB3", "PSMB5", "UBA52", "BAG5", "PSMC3", "PSMB9", "PSMB1", "PSMA7", "PSMD9", "TRIB3", "PSMC4", "PSMD3", "AXIN1", "CDC20", "PSMC5")
605	NUCLEOSIDE-TRIPHOSPHATASE ACTIVITY%GO%GO:0017111	6.08773e-07	3.32259e-06	0.659444	0.313546	2.0741	168	c("MYH6", "ATP2A2", "BLM", "ATP1A1", "RHOD", "ABCG1", "GNL3", "GNAO1", "DDX3X", "MYO5A", "EIF5", "RAB8B", "RAP1GAP", "EIF4A1", "DDX23", "ABCB6", "TAP1", "GNA13", "ABCD3", "RHOB", "ATL3", "TTF2", "GNL2", "NCF1", "MYL6", "MSH6", "CHD1", "DHX9", "KATNB1", "MYO1B", "SMARCA4", "DDX56", "HSP90AA1", "DHX15", "RHOF", "RAB5A", "KIF2A", "ATL2", "CENPE", "RAB27A", "RAB9A", "RAP1B", "ATP6V1F", "G3BP1", "RAB3…
606	REGULATION OF RETINOBLASTOMA PROTEIN%PATHWAY INTERACTION DATABASE NCI-NATURE CURATED DATA%REGULATION OF RETINOBLASTOMA PROTEIN	6.17928e-07	3.36699e-06	0.659444	0.53263	2.56466	34	c("CEBPD", "PPARG", "CDKN1A", "SPI1", "CDK2", "CDK6", "CKM", "E2F4", "MET", "SMARCA4", "CCND3", "ELF1", "E2F3", "JUN", "CTBP1", "CEBPB", "ABL1", "MAPK9", "RAF1", "MDM2", "MAPK14", "TFDP1", "CCNE1", "SUV39H1", "SMARCB1", "DNMT1", "E2F2", "AATF", "BRD2", "HDAC1")
607	ANGIOGENESIS%GO%GO:0001525	6.29872e-07	3.42642e-06	0.659444	0.43835	2.43389	61	c("CCL2", "HMOX1", "ACVRL1", "THBS1", "TGFBR2", "ITGA5", "ANXA2", "RAMP1", "SERPINE1", "TGFBI", "SAT1", "ENPEP", "FZD5", "TEK", "PARVA", "JMJD6", "ITGB3", "PDGFRB", "WNT5B", "ANGPT1", "NR4A1", "EPHB4", "ANG", "SRPK2", "ENG", "RBPJ", "ID1", "SLIT2", "SOX18", "CEACAM1", "PROK2", "PRKX", "CCBE1", "BMPER", "IL18", "SEMA3E", "EPHB2", "MYH9", "NRCAM", "LAMA5", "NCL", "AAMP", "VASH1", "CD34", "SOX17")
608	AMINO ACID TRANSPORT%GO%GO:0006865	6.46467e-07	3.51027e-06	0.659444	0.462516	2.48246	52	c("SLC1A5", "PDPN", "SLC11A1", "SLC38A1", "SLC36A4", "SLC1A3", "SLC36A1", "SLC38A2", "SLC7A8", "SLC6A6", "FOLR2", "SLC7A1", "ACACB", "SLC25A13", "SLC1A1", "SLC36A2", "SLC3A2", "SLC25A15", "SLC7A7", "SLC25A26", "SLC7A5", "SH3BP4", "SLC38A5", "SLC7A2", "SLC38A4", "STX1A", "STXBP1", "CLN3", "FOLR3", "SLC9A3R1", "SLC19A2", "SLC1A4", "GLS", "SLC25A22", "SLC16A10", "PRKAG2", "SLC19A1", "SLC43A1", "SLC7…
609	DNA REPLICATION%REACTOME%REACT_383.6	6.47805e-07	3.51027e-06	0.659444	0.455219	2.46682	55	c("CDKN1A", "CDK2", "PSME2", "PSMD8", "PSMB8", "CDC7", "POLA2", "PSME4", "PSMA4", "PSME1", "PSMA6", "PSMB6", "PSMD14", "PSMA3", "PSMD2", "E2F3", "MCM8", "PSMA5", "PSMD12", "GMNN", "PSMD13", "PSME3", "PSMB3", "CDT1", "POLD4", "POLE2", "MCM10", "PSMB5", "UBA52", "PSMC3", "PSMB9", "PSMB1", "POLD1", "PSMA7", "PSMD9", "PSMC4", "PSMD3", "PSMC5", "MCM5", "E2F2", "LIG1", "FEN1")
610	REGULATION OF RESPONSE TO CYTOKINE STIMULUS%GO%GO:0060759	6.48475e-07	3.51027e-06	0.659444	0.461646	2.44642	49	c("SOCS3", "PPARG", "EDN1", "HIF1A", "IRAK1", "SOCS1", "AXL", "SPHK1", "WNT5A", "IRAK3", "IFNGR1", "CD74", "JAK1", "PYCARD", "NR1H2", "GSTP1", "PARP9", "NR1H3", "PTPN1", "IL6ST", "FADD", "SLIT3", "SIGIRR", "ADIPOQ", "STAT2", "IFNAR2", "PTPN6", "MAPK7", "SLIT2", "PTPN2", "IRAK2", "HIPK1")
611	PROTEIN KINASE BINDING%GO%GO:0019901	6.62505e-07	3.58035e-06	0.659444	0.345992	2.21455	133	c("MYH6", "STAT3", "HCLS1", "PLEK", "GRK5", "ACVRL1", "HIF1A", "SOCS1", "NOD2", "AXIN2", "FGR", "BCL2L1", "CD4", "MVP", "TPRKB", "CSPG4", "PPP1CC", "ITGB2", "GRB2", "RPS19", "ZFP36", "AURKA", "ERRFI1", "RARA", "FZD5", "JTB", "BAD", "IQGAP1", "NEK6", "RPS3", "GSTP1", "KIF20A", "MAPK4", "PAK2", "HINT1", "CCND3", "RPS6", "PTPN1", "MAPK8IP3", "CDC25B", "ACSL3", "PICK1", "PRKAG1", "CDKN2D", "TNIP2", "…
612	RESPONSE TO PEPTIDE HORMONE STIMULUS%GO%GO:0043434	6.78241e-07	3.6594e-06	0.659444	0.373102	2.29059	101	c("NAMPT", "SOCS3", "FGF7", "EIF4EBP1", "PPARG", "STAT3", "ADCY3", "PRKAR2A", "SOCS1", "EIF4G1", "MYO5A", "PDK4", "GRB2", "GNG12", "ATP6V1A", "MAP2K1", "CAB39L", "EEF2K", "BAIAP2", "ATP6V0A2", "STRADB", "LYN", "ADCY1", "RPS6", "PTPN1", "ATP6V0A1", "ATP6V1F", "IRS2", "TCIRG1", "NRAS", "PRKAG1", "DOK1", "ATP6V0C", "PRKCI", "EIF2B4", "SHC1", "FOXO3", "ADIPOQ", "MAP2K2", "RHEB", "ADCY7", "YWHAB", "EI…
613	POSITIVE REGULATION OF ENDOCYTOSIS%GO%GO:0045807	6.83571e-07	3.68214e-06	0.659444	0.644193	2.64156	20	c("CCL2", "DOCK2", "NCKAP1L", "SLC11A1", "CCL21", "SELE", "DAB2", "SERPINE1", "MERTK", "PYCARD", "CAMK1D", "GATA2", "ANGPT1", "CALR", "PPT1")
614	POSITIVE REGULATION OF LIGASE ACTIVITY%GO%GO:0051351	6.92588e-07	3.72464e-06	0.659444	0.460993	2.44296	49	c("MID1IP1", "XRCC4", "PSME2", "PSMD8", "PSMB8", "PTEN", "PSME4", "PSMA4", "PSME1", "PSMA6", "PSMB6", "PSMD14", "PSMA3", "ANAPC7", "PSMD2", "PSMA5", "PSMD12", "FBXO5", "PSMD13", "ANAPC5", "PSME3", "PSMB3", "PSMB5", "UBA52", "PSMC3", "PSMB9", "PSMB1", "PSMA7", "PSMD9", "TRIB3", "PSMC4", "PSMD3", "AXIN1", "CDC20", "PSMC5")
615	TRANSCRIPTION, DNA-DEPENDENT%GO%GO:0006351	6.93915e-07	3.7257e-06	0.659444	0.279788	1.94387	274	c("CEBPD", "ZBTB7B", "PPARG", "MYC", "TSC22D1", "HIF1A", "TGIF1", "ATF4", "E2F5", "NR4A2", "TEAD2", "MAFF", "RORB", "SERPINE1", "NR4A3", "ESRRG", "IRF1", "FOSL1", "C5AR1", "SNRPB", "RUNX3", "BCL3", "PAPOLA", "HSF2", "ETV7", "MAF", "MSC", "BATF3", "RARA", "UBE2D3", "ESRRA", "NR1H2", "MED16", "TTF2", "NFKBIB", "SNRPG", "E2F4", "TEAD4", "NFE2L3", "GLIS3", "MAGOH", "RXRA", "BAZ1A", "MED20", "ZSCAN5A"…
616	CELLULAR RESPONSE TO BIOTIC STIMULUS%GO%GO:0071216	6.96917e-07	3.73575e-06	0.659444	0.490537	2.5197	44	c("CCL2", "SYK", "TLR4", "TLR2", "IRAK1", "SERPINE1", "LY96", "AXL", "IL10", "WNT5A", "LILRB2", "FZD5", "PYCARD", "TNFRSF1B", "TLR1", "GSTP1", "CD14", "LYN", "NR1H3", "HCK", "NLRP3", "WFS1", "TLR6", "TNIP2", "LILRB1", "MTDH", "IL18", "IL1B", "PRKCE", "SHPK", "TNFSF4")
617	STABILIZATION OF P53%REACTOME%REACT_309.2	7.10234e-07	3.80096e-06	0.659444	0.524691	2.55297	35	c("PSME2", "PSMD8", "PSMB8", "PSME4", "PSMA4", "PSME1", "PSMA6", "PSMB6", "PSMD14", "PSMA3", "PSMD2", "PSMA5", "PSMD12", "PSMD13", "PSME3", "RFWD2", "PSMB3", "PSMB5", "UBA52", "PSMC3", "MDM2", "PSMB9", "PSMB1", "PSMA7", "PSMD9", "PSMC4", "PSMD3", "PSMC5")
618	DEFENSE RESPONSE TO BACTERIUM%GO%GO:0042742	7.14124e-07	3.81559e-06	0.659444	0.562333	2.55352	28	c("PLA2G2A", "S100A9", "SYK", "SLC11A1", "S100A8", "TLR4", "IL6R", "PRKCD", "STAB1", "NOD2", "SERPINE1", "FGR", "ANXA3", "PYCARD", "S100A12")
619	RESPONSE TO MOLECULE OF BACTERIAL ORIGIN%GO%GO:0002237	7.24698e-07	3.86584e-06	0.659444	0.442784	2.456	60	c("CCL2", "SLC11A1", "TLR4", "TLR2", "IRAK1", "SELE", "NOD2", "SERPINE1", "LY96", "AXL", "IL10", "WNT5A", "IRAK3", "LILRB2", "CXCL2", "FZD5", "PYCARD", "TNFRSF1B", "TLR1", "GSTP1", "CD14", "MAPKAPK3", "LYN", "NR1H3", "HCK", "IRF5", "NLRP3", "TLR6", "TNIP2", "LILRB1", "MTDH", "IL6", "GCH1", "IL18", "IL1B", "PRKCE", "SHPK", "MAPKAPK2", "TNFSF4")
620	Chemokine signaling pathway%KEGG%hsa04062	7.33098e-07	3.89805e-06	0.659444	0.358298	2.22171	110	c("CCL2", "CCL11", "DOCK2", "WAS", "CCR1", "STAT3", "GRK5", "ADCY3", "CCL21", "PIK3R3", "PRKCD", "CXCL1", "PREX1", "FGR", "GRB2", "GNG12", "CXCL16", "CXCL2", "MAP2K1", "PLCB2", "NCF1", "NFKBIA", "NFKBIB", "CCL8", "PIK3R5", "PARD3", "TIAM1", "LYN", "RAC2", "NFKB1", "HCK", "GRK6", "ADCY1", "RAP1B", "CXCL6", "CSK", "NRAS", "CHUK", "RELA", "CDC42", "SHC1", "FOXO3", "GNAI2", "CXCL12", "RHOA", "ADCY7",…
621	POST-TRANSLATIONAL PROTEIN MODIFICATION%GO%GO:0043687	7.33098e-07	3.89805e-06	0.659444	0.358322	2.22187	110	c("GFPT2", "ALG3", "UAP1", "AGTPBP1", "RPN1", "MCFD2", "ST3GAL1", "EDEM2", "GNPNAT1", "B4GALT6", "MGAT4A", "PIGA", "EIF5A", "PMM2", "RPN2", "ALG8", "PLAUR", "MAN1A1", "PIGH", "PIGT", "ALG5", "FURIN", "SEC24D", "B4GALT3", "DDOST", "MAN2A2", "GCNT1", "GMPPB", "MGAT1", "GALNT10", "CALR", "PGM3", "GALNT1", "B4GALT1", "ST3GAL2", "RHBDD1", "GANAB", "VKORC1", "DAD1", "LMAN1", "ST3GAL4", "B4GALT5", "MGAT…
622	RESPONSE TO TYPE I INTERFERON%GO%GO:0034340	7.53073e-07	3.99782e-06	0.659444	0.50721	2.5349	40	c("SOCS3", "IRF8", "ISG20", "IFITM2", "SOCS1", "IRF1", "IFI27", "IFITM1", "PSMB8", "JAK1", "IFITM3", "GBP2", "HLA-E", "IFI35", "IRF5", "PTPN1", "HLA-A", "HLA-B", "OAS1", "STAT2", "IFNAR2", "PTPN6", "ADAR", "EGR1", "MX1", "TRIM56", "ISG15", "MX2", "IRF7", "HLA-F", "IRF9", "IFI6", "OAS3", "IFNAR1", "HLA-C")
623	G1 S DNA DAMAGE CHECKPOINTS%REACTOME%REACT_2254.1	7.80129e-07	4.13481e-06	0.659444	0.506024	2.52898	40	c("CDKN1A", "CDK2", "PSME2", "PSMD8", "PSMB8", "PSME4", "PSMA4", "PSME1", "PSMA6", "PSMB6", "PSMD14", "PSMA3", "PSMD2", "PSMA5", "PSMD12", "PSMD13", "PSME3", "RFWD2", "PSMB3", "PSMB5", "UBA52", "PSMC3", "MDM2", "PSMB9", "PSMB1", "PSMA7", "PSMD9", "PSMC4", "PSMD3", "CCNE1", "PSMC5")
624	RESPONSE TO VIRUS%GO%GO:0009615	8.11899e-07	4.2963e-06	0.659444	0.390404	2.33466	88	c("APOB", "CCL11", "ENO1", "ISG20", "PLSCR1", "SAMHD1", "IFITM2", "DDX3X", "DCLK1", "PRKRA", "IRF1", "FOSL1", "FGR", "BCL3", "CDK6", "TLR8", "IRAK3", "HYAL2", "IFNGR1", "IFITM1", "BATF3", "EXOSC4", "PYCARD", "IFI16", "ACTA2", "IFITM3", "NPC2", "TRIM5", "CCL8", "RPS15A", "ABCE1", "ZC3HAV1", "CFL1", "IFI35", "FADD", "CHUK", "RELA", "LILRB1", "CCT5", "SLFN11", "IL6", "OAS1", "CXCL12", "BST2", "IFNAR…
625	IL6-MEDIATED SIGNALING EVENTS%PATHWAY INTERACTION DATABASE NCI-NATURE CURATED DATA%IL6-MEDIATED SIGNALING EVENTS	8.13665e-07	4.29875e-06	0.659444	0.532483	2.53609	33	c("SOCS3", "CEBPD", "MYC", "STAT3", "IL6R", "PRKCD", "IRF1", "BCL2L1", "TIMP1", "GRB2", "JAK1", "HSP90B1", "MAP2K4", "LMO4", "HCK", "IL6ST", "JUN", "FOS", "A2M", "IL6", "CEBPB", "SOS1", "PTPRE", "JUNB", "VAV1", "MAPK14", "RAC1")
626	INTERFERON ALPHA BETA SIGNALING%REACTOME%REACT_25162.1	8.26973e-07	4.36208e-06	0.659444	0.521226	2.55813	37	c("SOCS3", "IRF8", "ISG20", "IFITM2", "SOCS1", "IRF1", "IFI27", "IFITM1", "PSMB8", "JAK1", "IFITM3", "GBP2", "HLA-E", "IFI35", "IRF5", "PTPN1", "HLA-A", "HLA-B", "OAS1", "STAT2", "PTPN6", "ADAR", "EGR1", "MX1", "ISG15", "MX2", "IRF7", "HLA-F", "IRF9", "IFI6", "OAS3", "IFNAR1", "HLA-C")
627	ACTIVATION OF NF-KAPPAB IN B CELLS%REACTOME%REACT_118656.2	8.30084e-07	4.36485e-06	0.659444	0.488875	2.51117	44	c("PSME2", "PSMD8", "PSMB8", "MALT1", "NFKBIA", "NFKBIB", "PSME4", "PSMA4", "PSME1", "PSMA6", "PSMB6", "NFKB1", "PSMD14", "PSMA3", "PSMD2", "CHUK", "PSMA5", "PSMD12", "RELA", "PSMD13", "PSME3", "PSMB3", "PSMB5", "UBA52", "PSMC3", "PSMB9", "PSMB1", "PSMA7", "PSMD9", "PSMC4", "PSMD3", "PSMC5", "IKBKB", "IKBKG", "REL")
628	HYDROLASE ACTIVITY, ACTING ON ESTER BONDS%GO%GO:0016788	8.30142e-07	4.36485e-06	0.659444	0.293974	1.99391	211	c("AZGP1", "SGPP2", "PLA2G2A", "PRDX6", "PTP4A2", "PDE4D", "RNASE6", "ISG20", "CCR1", "CEL", "ABHD5", "C3AR1", "DUSP2", "IMPA2", "PTPRU", "DUSP1", "PTPRG", "LIPA", "NME1", "PPP1CC", "RNASE2", "UCHL3", "USP12", "EXOSC4", "USP2", "PNPLA8", "PGLS", "FBP1", "PDE2A", "PPP2CB", "PTEN", "APEX1", "PLCB2", "PDE11A", "LPIN2", "RPS3", "USP10", "SSH2", "DAPP1", "OCRL", "DUSP5", "DUSP12", "SSU72", "PPP6C", "R…
629	AXON GUIDANCE%REACTOME%REACT_18266.1	8.32637e-07	4.37101e-06	0.659444	0.333001	2.13766	137	c("TYROBP", "CHL1", "IL6R", "ITGA5", "SDCBP", "ITGA2", "ABLIM3", "RPS6KA2", "PLXNB1", "FES", "COL4A4", "NTN1", "CAP1", "JAK1", "MAP2K1", "STIP1", "TRIO", "RHOB", "ITGB1", "COL6A3", "MYL6", "KCNQ3", "SCN9A", "MET", "ITGB3", "HSP90AA1", "RPS6KA1", "PAK2", "CFL1", "CSNK2A1", "AP2S1", "RAC2", "ALCAM", "CACNB3", "SLIT3", "NRAS", "PFN1", "VASP", "GFRA2", "COL6A2", "CDC42", "PITPNA", "ERBB2", "MAP2K2", …
630	LEUKOCYTE ACTIVATION%GO%GO:0045321	8.35988e-07	4.38164e-06	0.659444	0.357396	2.21612	110	c("SYK", "DOCK2", "SLC11A1", "TLR4", "LCP1", "EDN1", "BTK", "CD86", "ADA", "CCL21", "TGFBR2", "STXBP2", "PRKCD", "PREX1", "LRRC8A", "CD276", "CD4", "IL10", "AIF1", "CLEC7A", "ANXA3", "HYAL2", "BATF3", "CD74", "FZD5", "PYCARD", "S100A12", "ELF4", "ITGB1", "SBNO2", "MSH6", "CEBPG", "ANXA1", "TLR1", "MT1G", "CSF1", "DDOST", "CLCF1", "HELLS", "EDN2", "STOML2", "MICB", "LILRB1", "BATF", "TNFSF14", "LA…
631	TRANSCRIPTION FROM RNA POLYMERASE II PROMOTER%GO%GO:0006366	8.4717e-07	4.43321e-06	0.659444	0.298898	2.04438	223	c("CEBPD", "ZBTB7B", "PPARG", "MYC", "TSC22D1", "HIF1A", "TGIF1", "ATF4", "E2F5", "NR4A2", "TEAD2", "MAFF", "RORB", "SERPINE1", "NR4A3", "ESRRG", "IRF1", "FOSL1", "C5AR1", "SNRPB", "RUNX3", "PAPOLA", "HSF2", "ETV7", "MAF", "MSC", "BATF3", "RARA", "UBE2D3", "ESRRA", "NR1H2", "MED16", "TTF2", "SNRPG", "E2F4", "TEAD4", "NFE2L3", "GLIS3", "MAGOH", "RXRA", "MED20", "ZSCAN5A", "CBFB", "LSM10", "ADRM1",…
632	ENDOCYTIC VESICLE MEMBRANE%GO%GO:0030666	8.80599e-07	4.60085e-06	0.659444	0.488299	2.55761	47	c("APOB", "SLC11A1", "CYBB", "CYBA", "HLA-DRA", "B2M", "NOSTRIN", "PICALM", "CLTC", "ANXA3", "CD74", "HLA-DPA1", "CAV1", "HLA-DRB4", "HLA-E", "ATP6V0A2", "HLA-DPB1", "AP2S1", "ATP6V0A1", "HLA-A", "TCIRG1", "PICK1", "ATP6V0C", "HLA-B", "FCGR1A", "LDLR", "CLTA", "FCGR1B", "HLA-DRB3", "UBA52", "ATP6V0B", "AP2A2", "MDM2", "ATP6V0D1", "AP2A1", "NOS3", "HLA-F")
633	GROWTH FACTOR BINDING%GO%GO:0019838	9.01107e-07	4.70056e-06	0.659444	0.487686	2.50506	44	c("OSMR", "PDGFRA", "NKD2", "ACVRL1", "TGFBR3", "IL6R", "THBS1", "TGFBR2", "HYAL2", "RPS19", "LIFR", "COL5A1", "FURIN", "SEC61B", "RPS2", "PDGFRB", "ACVR1B", "FLT1", "IL6ST", "IGFBP2", "ERBB2", "ENG", "A2M", "COL1A1", "IL2RG", "PCSK6", "COL6A1", "ERBB3", "KLB", "KL", "NTRK1", "ACVR1", "IL1RAPL1", "TRIM16", "FGFR4", "COL4A1")
634	NEGATIVE REGULATION OF LOCOMOTION%GO%GO:0040013	9.13242e-07	4.75635e-06	0.659444	0.457275	2.42326	49	c("CCL2", "HMOX1", "ACVRL1", "THBS1", "IFITM2", "PTPRU", "CLIC4", "SERPINE1", "RNF41", "TIMP1", "NF2", "AIF1", "HYAL2", "ANGPT2", "IFITM1", "IFITM3", "PTEN", "CHRD", "LRP1", "CITED2", "RAP2C", "DAG1", "MIA3", "ENG", "ADIPOQ", "BST2", "SLIT2", "PTPRO", "GTPBP4", "PTPRK", "BMP5", "CSNK2B", "NR2F2", "ADARB1", "VASH1", "HAS1", "ALOX15B", "TRIB1", "C13ORF15")
635	RESPONSE TO NITROGEN COMPOUND%GO%GO:1901698	9.17368e-07	4.76165e-06	0.659444	0.327157	2.13986	158	c("NAMPT", "SOCS3", "FGF7", "EIF4EBP1", "PPARG", "STAT3", "HMOX1", "ADCY3", "AQP9", "PRKAR2A", "SOCS1", "NOD2", "EIF4G1", "MYO5A", "CDK2", "PRKRA", "PDK4", "GRB2", "IRAK3", "GNG12", "EGLN1", "ATP6V1A", "MAP2K1", "PDE2A", "CAB39L", "BAD", "EEF2K", "BAIAP2", "ATP6V0A2", "HSP90B1", "SH3BP4", "KYNU", "STRADB", "LYN", "IRF5", "ADCY1", "RPS6", "PTPN1", "ATP6V0A1", "ATP6V1F", "IRS2", "TCIRG1", "NRAS", "…
636	REGULATION OF NUCLEOTIDE METABOLIC PROCESS%GO%GO:0006140	9.18287e-07	4.76165e-06	0.659444	0.3396	2.17922	136	c("MYH6", "CCL11", "FGD2", "NCKAP1L", "PLSCR1", "MYL4", "CCL21", "GABBR2", "RAMP1", "PREX1", "AXIN2", "TBC1D2", "PID1", "RGS19", "RGS10", "UHRF1", "MYL3", "RAP1GAP", "WNT5A", "RGS1", "PLXNB1", "CAP1", "MYBPC3", "ERRFI1", "CDC42EP2", "PDE2A", "RGS2", "RANGAP1", "EDNRB", "ADAP2", "IQGAP1", "TMED2", "OCRL", "ARHGAP4", "ARHGAP9", "SH3BP4", "FGD3", "DNAJC1", "AKAP12", "ECT2", "GPR161", "AHSA1", "ADORA…
637	ORC1 REMOVAL FROM CHROMATIN%REACTOME%REACT_1156.2	9.21259e-07	4.76165e-06	0.659444	0.508103	2.52184	39	c("CDKN1A", "CDK2", "PSME2", "PSMD8", "PSMB8", "PSME4", "PSMA4", "PSME1", "PSMA6", "PSMB6", "PSMD14", "PSMA3", "PSMD2", "MCM8", "PSMA5", "PSMD12", "PSMD13", "PSME3", "PSMB3", "CDT1", "PSMB5", "UBA52", "PSMC3", "PSMB9", "PSMB1", "PSMA7", "PSMD9", "PSMC4", "PSMD3", "PSMC5", "MCM5")
638	SWITCHING OF ORIGINS TO A POST-REPLICATIVE STATE%REACTOME%REACT_2148.2	9.21259e-07	4.76165e-06	0.659444	0.508103	2.52184	39	c("CDKN1A", "CDK2", "PSME2", "PSMD8", "PSMB8", "PSME4", "PSMA4", "PSME1", "PSMA6", "PSMB6", "PSMD14", "PSMA3", "PSMD2", "MCM8", "PSMA5", "PSMD12", "PSMD13", "PSME3", "PSMB3", "CDT1", "PSMB5", "UBA52", "PSMC3", "PSMB9", "PSMB1", "PSMA7", "PSMD9", "PSMC4", "PSMD3", "PSMC5", "MCM5")
639	EXTRACELLULAR MATRIX%GO%GO:0031012	9.22911e-07	4.76165e-06	0.659444	0.390586	2.34401	90	c("LMCD1", "ADAMTS9", "EMILIN1", "PLSCR1", "EFEMP1", "THBS1", "TIMP3", "ANXA2", "FBN2", "SERPINE1", "NID1", "ADAM11", "TGFBI", "CD248", "FBLN1", "COL5A3", "COL4A4", "FBLN5", "LGALS3", "TFPI2", "COL5A1", "CTSG", "COL6A3", "TPSAB1", "ADAMTS3", "VWF", "FBN1", "ECM1", "FN1", "RARRES2", "MMP19", "TNC", "DCN", "PCOLCE", "DAG1", "LGALS3BP", "MGP", "ANG", "COL6A2", "CFP", "COL1A1", "COL18A1", "PCSK6", "C…
640	MITOTIC ANAPHASE%REACTOME%REACT_1275.2	9.22911e-07	4.76165e-06	0.659444	0.390558	2.34384	90	c("RPS27", "PPP2R5A", "PSME2", "PSMD8", "PPP1CC", "PSMB8", "PPP2CB", "CLIP1", "AHCTF1", "RANGAP1", "SPC24", "PSME4", "PSMA4", "PSME1", "PSMA6", "LMNB1", "PSMB6", "KIF2A", "CENPE", "PSMD14", "PSMA3", "NDEL1", "ANAPC7", "PSMD2", "B9D2", "PSMA5", "PSMD12", "NUDC", "PSMD13", "ZW10", "ANAPC5", "PSME3", "BIRC5", "PTTG1", "CENPO", "PSMB3", "KNTC1", "CENPN", "NUP85", "PSMB5", "UBA52", "PSMC3", "PSMB9", "…
641	FAS%IOB%FAS	9.27582e-07	4.77792e-06	0.659444	0.426511	2.44483	69	c("BTK", "CD59", "PRKCD", "BCL2L1", "CASP4", "CAST", "ARHGDIB", "BID", "MAP2K1", "RIPK2", "CSNK1A1", "TCP1", "MET", "DAXX", "RIPK1", "PAK2", "LMNB1", "CSNK2A1", "EIF3J", "LYN", "CASP7", "FADD", "SRP72", "STK3", "CSNK1E", "DIABLO", "RELA", "CDC42", "VIM", "DEDD", "MAP2K2", "PSME3", "EIF2S1", "PTPN6", "STK4", "UBE2I", "MBD4", "MAPK9", "CASP1", "MAX", "RAF1", "CFLAR", "BAX", "CSNK2B", "DEDD2", "MAPK…
642	CELLULAR RESPONSE TO FIBROBLAST GROWTH FACTOR STIMULUS%GO%GO:0044344	9.30407e-07	4.77792e-06	0.659444	0.438198	2.43964	62	c("CCL2", "FGF7", "FGF12", "ADCY3", "PRKAR2A", "PRKCD", "CD44", "GRB2", "HYAL2", "FGFRL1", "MAP2K1", "PPP2CB", "PTEN", "BAD", "RPS6KB2", "ITPR3", "ADCY1", "NR4A1", "NRAS", "CHUK", "SHC1", "CALM2", "FOXO3", "MAP2K2", "ADCY7", "YWHAB", "SOS1", "KRAS", "UBA52", "RAF1", "KLB", "PRKCE", "MAPKAP1", "CALM3", "MDM2", "PDE1B", "ADCY9", "TRIB3", "FGF5", "SPRY2", "KL", "SHCBP1", "CREB1", "FGFR4", "ADCY4", "…
643	RESPONSE TO FIBROBLAST GROWTH FACTOR STIMULUS%GO%GO:0071774	9.30407e-07	4.77792e-06	0.659444	0.438198	2.43964	62	c("CCL2", "FGF7", "FGF12", "ADCY3", "PRKAR2A", "PRKCD", "CD44", "GRB2", "HYAL2", "FGFRL1", "MAP2K1", "PPP2CB", "PTEN", "BAD", "RPS6KB2", "ITPR3", "ADCY1", "NR4A1", "NRAS", "CHUK", "SHC1", "CALM2", "FOXO3", "MAP2K2", "ADCY7", "YWHAB", "SOS1", "KRAS", "UBA52", "RAF1", "KLB", "PRKCE", "MAPKAP1", "CALM3", "MDM2", "PDE1B", "ADCY9", "TRIB3", "FGF5", "SPRY2", "KL", "SHCBP1", "CREB1", "FGFR4", "ADCY4", "…
644	Shigellosis%KEGG%hsa05131	9.36793e-07	4.80325e-06	0.659444	0.487006	2.50156	44	c("WAS", "HCLS1", "ITGA5", "NOD2", "CD44", "ACTG1", "RIPK2", "ARPC1B", "ITGB1", "ARPC3", "MAPK13", "NFKBIA", "NFKBIB", "ARPC5", "ARPC4", "NFKB1", "CSK", "ARPC5L", "ARPC2", "PFN1", "MAD2L2", "CHUK", "RELA", "CDC42", "ACTB", "CTTN", "RHOG", "ABL1", "CRKL", "MAPK9", "U2AF1", "MAPK14", "RAC1", "IKBKB", "IKBKG")
645	AXON GUIDANCE%GO%GO:0007411	9.51661e-07	4.87192e-06	0.659444	0.337202	2.18436	145	c("TYROBP", "CHL1", "ITGA5", "SDCBP", "ITGA2", "ABLIM3", "RPS6KA2", "CLTC", "WNT5A", "GRB2", "ACTG1", "PLXNB1", "FES", "COL4A4", "NTN1", "CAP1", "MAP2K1", "STIP1", "TRIO", "COL5A1", "RHOB", "ITGB1", "COL6A3", "MYL6", "KCNQ3", "MET", "ITGB3", "HSP90AA1", "RPS6KA1", "PAK2", "CFL1", "CSNK2A1", "AP2S1", "RAC2", "ALCAM", "TUBB3", "CACNB3", "SLIT3", "NRAS", "VASP", "COL6A2", "CDC42", "PITPNA", "ERBB2",…
646	DOWNSTREAM SIGNAL TRANSDUCTION%REACTOME%REACT_17025.4	9.80587e-07	5.01223e-06	0.643552	0.419384	2.41107	70	c("FGF7", "PDGFRA", "STAT3", "CDKN1A", "ADCY3", "CD86", "IL6R", "PRKAR2A", "PIK3R3", "PRKCD", "JAK1", "MAP2K1", "PTEN", "BAD", "RPS6KB2", "ITPR3", "PDGFRB", "ADCY1", "NR4A1", "IRS2", "NRAS", "CHUK", "CALM2", "ERBB2", "FOXO3", "MAP2K2", "IL6", "ADCY7", "YWHAB", "SOS1", "KRAS", "CRKL", "RAF1", "KLB", "BCAR1", "VAV1", "STAT5A", "PRKCE", "MAPKAP1", "CALM3", "MDM2", "PDE1B", "ADCY9", "TRIB3", "RAPGEF1…
647	IL2-MEDIATED SIGNALING EVENTS%PATHWAY INTERACTION DATABASE NCI-NATURE CURATED DATA%IL2-MEDIATED SIGNALING EVENTS	9.84373e-07	5.0238e-06	0.643552	0.526938	2.53725	34	c("SOCS3", "SYK", "MYC", "STAT3", "SOCS1", "CDK2", "GRB2", "JAK1", "IL2RA", "MAP2K1", "DOK2", "IRS2", "NRAS", "JUN", "FOS", "SHC1", "MAP2K2", "RHOA", "IL2RG", "SOS1", "KRAS", "MAPK9", "RAF1", "STAT5A", "PRKCE", "MAPKAPK2", "MAPK14")
648	CELLULAR RESPONSE TO LIPOPOLYSACCHARIDE%GO%GO:0071222	9.91062e-07	5.05013e-06	0.643552	0.520166	2.53096	35	c("CCL2", "TLR4", "TLR2", "IRAK1", "SERPINE1", "LY96", "AXL", "IL10", "WNT5A", "LILRB2", "PYCARD", "TNFRSF1B", "GSTP1", "CD14", "LYN", "NR1H3", "HCK", "NLRP3", "TNIP2", "LILRB1", "MTDH", "IL18", "IL1B", "PRKCE", "SHPK", "TNFSF4")
649	REGULATION OF CELLULAR AMINO ACID METABOLIC PROCESS%GO%GO:0006521	1.00277e-06	5.08521e-06	0.643552	0.526222	2.5338	34	c("NQO1", "PSME2", "PSMD8", "PSMB8", "PSME4", "PSMA4", "PSME1", "PSMA6", "PSMB6", "PSMD14", "PSMA3", "PSMD2", "PSMA5", "PSMD12", "OAZ1", "PSMD13", "PSME3", "PSMB3", "PSMB5", "PSMC3", "PSMB9", "PSMB1", "PSMA7", "PSMD9", "PSMC4", "PSMD3", "PSMC5")
650	TRANSCRIPTION FACTOR BINDING%GO%GO:0008134	1.0031e-06	5.08521e-06	0.643552	0.32153	2.12125	166	c("MAFB", "HEY2", "PIM1", "PPARG", "MYC", "STAT3", "HCLS1", "HIF1A", "TCF21", "ARNTL", "E2F5", "GPX3", "DDX3X", "SPI1", "HES6", "TNFRSF10A", "BCL3", "MLX", "ADD1", "HIPK2", "NKX3-1", "RARA", "NKX2-5", "IFI16", "HDGF", "MED16", "NFKBIA", "CEBPG", "RPS3", "E2F4", "DAXX", "FOXK2", "DHX9", "SMARCA4", "RXRA", "PSMA6", "YWHAZ", "GATA2", "LMO4", "NFKB1", "NCOA3", "MED25", "USP7", "SIRT2", "WFS1", "AHR",…
651	ANATOMICAL STRUCTURE FORMATION INVOLVED IN MORPHOGENESIS%GO%GO:0048646	1.00411e-06	5.08521e-06	0.643552	0.322955	2.12142	162	c("HOPX", "CCL2", "MYH6", "FAIM2", "PDGFRA", "OSR1", "HMOX1", "AGTPBP1", "ACVRL1", "TGFBR3", "PCNT", "TCF21", "THBS1", "TGFBR2", "ITGA5", "DUSP2", "EPB41L3", "ANXA2", "FBN2", "DUSP1", "RAMP1", "SERPINE1", "AXIN2", "TGFBI", "SAT1", "SNAI2", "WNT5A", "ENPEP", "SOX11", "FZD5", "NKX2-5", "RPGR", "TEK", "PARVA", "JMJD6", "RAB8A", "CAV1", "ITGB3", "OCRL", "DUSP5", "PDGFRB", "CCDC28B", "WNT5B", "LMO4", …
652	PROTEIN SERINE/THREONINE KINASE ACTIVITY%GO%GO:0004674	1.00411e-06	5.08521e-06	0.643552	0.342489	2.18704	130	c("MARK3", "PIM1", "MAP3K8", "WNK3", "GRK5", "ACVRL1", "TGFBR3", "MAP3K6", "IRAK1", "TGFBR2", "PRKCD", "CDK2", "WNK1", "STK17B", "CDK6", "RPS6KA2", "IRAK3", "HIPK2", "MAP2K1", "MAPK13", "CSNK1A1", "RPS6KB2", "NEK6", "EEF2K", "UHMK1", "OXSR1", "RPS6KA1", "RIPK1", "PAK2", "MAPKAPK3", "IRAK4", "SRPK1", "CSNK2A1", "RIPK3", "DMPK", "ACVR1B", "CDC42BPA", "PHKG2", "PRKCH", "MAPK6", "STK3", "PRKAG1", "CH…
653	REGULATION OF T CELL ACTIVATION%GO%GO:0050863	1.02745e-06	5.19545e-06	0.643552	0.411881	2.40574	75	c("CCL2", "NCKAP1L", "MAP3K8", "CD209", "CD86", "CCL21", "TGFBR2", "PIK3R3", "NOD2", "HLA-DRA", "EBI3", "IRF1", "CD276", "CD4", "IL10", "GRB2", "AIF1", "LILRB2", "HLA-DPA1", "RARA", "MALT1", "PYCARD", "YES1", "CAV1", "HLA-DRB4", "CD274", "PAK2", "HLA-DPB1", "LYN", "IL6ST", "CLPTM1", "CSK", "IGFBP2", "TNFRSF14", "CDC42", "LILRB1", "IL6", "PTPN6", "HLA-DRB3", "IL18", "VAV1", "IL1B", "MAPKAP1", "TNF…
654	CELLULAR RESPONSE TO TYPE I INTERFERON%GO%GO:0071357	1.08544e-06	5.47194e-06	0.643552	0.505339	2.50812	39	c("SOCS3", "IRF8", "ISG20", "IFITM2", "SOCS1", "IRF1", "IFI27", "IFITM1", "PSMB8", "JAK1", "IFITM3", "GBP2", "HLA-E", "IFI35", "IRF5", "PTPN1", "HLA-A", "HLA-B", "OAS1", "STAT2", "IFNAR2", "PTPN6", "ADAR", "EGR1", "MX1", "ISG15", "MX2", "IRF7", "HLA-F", "IRF9", "IFI6", "OAS3", "IFNAR1", "HLA-C")
655	TYPE I INTERFERON-MEDIATED SIGNALING PATHWAY%GO%GO:0060337	1.08544e-06	5.47194e-06	0.643552	0.505339	2.50812	39	c("SOCS3", "IRF8", "ISG20", "IFITM2", "SOCS1", "IRF1", "IFI27", "IFITM1", "PSMB8", "JAK1", "IFITM3", "GBP2", "HLA-E", "IFI35", "IRF5", "PTPN1", "HLA-A", "HLA-B", "OAS1", "STAT2", "IFNAR2", "PTPN6", "ADAR", "EGR1", "MX1", "ISG15", "MX2", "IRF7", "HLA-F", "IRF9", "IFI6", "OAS3", "IFNAR1", "HLA-C")
656	POSITIVE REGULATION OF PROTEIN UBIQUITINATION%GO%GO:0031398	1.11716e-06	5.62329e-06	0.643552	0.427378	2.42729	66	c("PSME2", "PSMD8", "NDFIP2", "SPHK1", "PSMB8", "MALT1", "RIPK2", "PTEN", "PSME4", "PSMA4", "PSME1", "PSMA6", "PSMB6", "ANGPT1", "PSMD14", "PSMA3", "ANAPC7", "PSMD2", "WFS1", "PSMA5", "PSMD12", "FBXO5", "FANCI", "PSMD13", "ANAPC5", "PSME3", "RASSF1", "PSMB3", "HSPBP1", "PSMB5", "UBA52", "STRA13", "PSMC3", "PSMB9", "PSMB1", "PSMA7", "PSMD9", "TRIB3", "PSMC4", "PSMD3", "AXIN1", "CDC20", "FKBP1A", "…
657	CELLULAR ION HOMEOSTASIS%GO%GO:0006873	1.12088e-06	5.63342e-06	0.643552	0.314651	2.08548	172	c("ATP2A2", "CCL11", "S1PR3", "S100A9", "PDGFRA", "SLC11A1", "S100A8", "CCR1", "MYC", "HMOX1", "EDN1", "C3AR1", "SCARA5", "TFRC", "CCL21", "SLC4A3", "EPB41L3", "SLC39A14", "AGTR1", "PID1", "BCL2L1", "P2RY2", "STEAP3", "GNA15", "SLC11A2", "MT2A", "CD55", "LPAR1", "ABCB6", "MAL", "ATP6V1A", "GPR89B", "PTEN", "FTL", "BAD", "SLC9A1", "CCL8", "CLCN3", "CAV1", "ITPR3", "LTF", "GPR89A", "ATP6V0A2", "HSP…
658	SYNAPTIC TRANSMISSION%GO%GO:0007268	1.14027e-06	5.72217e-06	0.643552	0.323896	2.13482	165	c("NPTX2", "KCNIP2", "KCNK1", "NQO1", "SLC38A1", "ADCY3", "GLUL", "SLC1A3", "HCN4", "SLC38A2", "KCNJ8", "GABBR2", "KCNH2", "SDCBP", "GCHFR", "KCNK3", "RPS6KA2", "VIPR1", "GRIN2A", "NCALD", "MUSK", "GNG12", "PMP22", "GRIK2", "SLC1A1", "KCNN2", "PTEN", "ITSN1", "PLCB2", "KCNQ3", "KCNJ5", "STX12", "RPS6KA1", "AP2S1", "ADCY1", "SYPL1", "GABRB3", "GRIK3", "PICK1", "CACNB3", "CACNA1E", "BLOC1S1", "PPT1…
659	BIOCARTA_IL2RB_PATHWAY%MSIGDB_C2%BIOCARTA_IL2RB_PATHWAY	1.16445e-06	5.8346e-06	0.643552	0.583382	2.52276	24	c("SOCS3", "SYK", "MYC", "SOCS1", "BCL2L1", "GRB2", "JAK1", "IL2RA", "BAD", "NMI", "PPIA", "FOS", "SHC1", "IL2RG", "PTPN6", "SOS1", "CRKL", "RAF1", "STAT5A", "CFLAR")
660	POSITIVE REGULATION OF CELL DEATH%GO%GO:0010942	1.17222e-06	5.86466e-06	0.643552	0.314371	2.08362	172	c("S100A9", "S100A8", "BCL6", "PPARG", "DDIT4", "TLR2", "THBS1", "ATF4", "DCUN1D3", "DDX3X", "AXIN2", "PTGIS", "IRF1", "TNFRSF10A", "RNF41", "ADAMTSL4", "RUNX3", "STK17B", "CASP4", "MTCH1", "IL10", "RPS6KA2", "EEF1E1", "WNT5A", "HYAL2", "BID", "HTATIP2", "EIF5A", "PAWR", "NKX3-1", "AKR1C3", "MAL", "PYCARD", "PTEN", "RHOB", "ITGB1", "BAD", "RPS3", "DAXX", "MNDA", "RIPK1", "BAK1", "TRIM13", "RIPK3"…
661	NUCLEOSIDE-TRIPHOSPHATASE REGULATOR ACTIVITY%GO%GO:0060589	1.21372e-06	6.0631e-06	0.643552	0.352759	2.21902	120	c("FGD2", "DOCK2", "NCKAP1L", "SPATA13", "PREX1", "AXIN2", "TBC1D2", "RGS19", "RGS18", "RGS10", "RGS1", "MYBPC3", "ERRFI1", "CDC42EP2", "IPO7", "TRIO", "ARL2BP", "RGS2", "ITSN1", "ADAP2", "IQGAP1", "IPO5", "RAB3IL1", "OCRL", "ARHGAP4", "ARHGAP9", "SH3BP4", "PSD4", "FGD3", "DNAJC1", "ECT2", "SBF1", "AHSA1", "DENND2D", "SIPA1", "JUN", "DOCK5", "EIF2B4", "RP2", "PTGIR", "MYO9B", "EIF2B5", "DENND3", …
662	SIGNALING BY GPCR%REACTOME%REACT_14797.3	1.22356e-06	6.103e-06	0.643552	0.27153	1.89309	291	c("CCL2", "C3", "CCL11", "S1PR3", "FPR1", "FGD2", "PDE4B", "PDE4D", "CCR1", "GRK5", "ADCY3", "PPP3CC", "EDN1", "C3AR1", "IL6R", "CCL21", "PRKAR2A", "PIK3R3", "PRKCD", "OPN3", "GABBR2", "GNAO1", "FPR3", "CXCL1", "AGTR1", "RAMP1", "GPR4", "RGS19", "P2RY2", "C5AR1", "RGS18", "RGS10", "GNA15", "RPS6KA2", "WNT5A", "RGS1", "VIPR1", "PLXNB1", "DGKD", "CD55", "GNG12", "LPAR1", "CXCL16", "JAK1", "CXCL2", …
663	EXOCYTOSIS%GO%GO:0006887	1.23217e-06	6.13671e-06	0.643552	0.388487	2.30966	84	c("CFD", "F13A1", "SYK", "F5", "SRGN", "CCR1", "F8", "PLEK", "SERPINA1", "THBS1", "STXBP2", "ALDOA", "SERPINE1", "WDR1", "TIMP1", "ANXA3", "PSAP", "CD63", "CAP1", "SERPING1", "RAB8A", "CCL8", "VWF", "FN1", "STX12", "ITGB3", "CFL1", "LYN", "HCK", "RAB27A", "TUBA4A", "CALU", "PFN1", "STX2", "PPIA", "MIA3", "ABCC4", "CALM2", "A2M", "NSF", "TMSB4X", "TF", "TMED10", "STXBP1", "SPARC", "HSPA5", "SDF4",…
664	CELL ADHESION%GO%GO:0007155	1.25778e-06	6.25482e-06	0.643552	0.300344	2.01555	191	c("AZGP1", "CCL2", "BMP7", "ATP2A2", "CCL11", "S100A9", "SPOCK1", "SYK", "PDGFRA", "FERMT3", "LYVE1", "CD209", "S100A8", "CCR1", "CD58", "PLEK", "CCL21", "THBS1", "ITGA11", "ITGAM", "ITGA5", "NINJ2", "SELE", "STAB1", "PARVG", "PTPRU", "CD44", "ITGA2", "NCAM2", "SIGLEC1", "TYRO3", "ITGA7", "ITGB2", "CORO1A", "FERMT2", "ITGA3", "CADM3", "LILRB2", "FBLN5", "CDH19", "TEK", "NME1-NME2", "PARVA", "PPFI…
665	SIGNALING BY SCF-KIT%REACTOME%REACT_111040.3	1.31567e-06	6.51684e-06	0.643552	0.422323	2.38131	65	c("FGF7", "PDGFRA", "STAT3", "CDKN1A", "CD86", "IL6R", "PIK3R3", "SOCS1", "PTPRU", "FES", "JAK1", "MAP2K1", "PTEN", "BAD", "YES1", "RPS6KB2", "PDGFRB", "LYN", "NR4A1", "IRS2", "NRAS", "CHUK", "ERBB2", "FOXO3", "MAP2K2", "IL6", "MMP9", "YWHAB", "PTPN6", "SOS1", "KRAS", "RAF1", "KLB", "SH2B3", "VAV1", "STAT5A", "MAPKAP1", "MDM2", "TRIB3", "RAC1", "CREB1", "EREG", "CD28", "GRAP", "FGFR4", "MAPK3", "…
666	OLFACTORY SIGNALING PATHWAY%REACTOME%REACT_15488.3	1.31646e-06	6.51684e-06	0.643552	-0.382687	-3.12232	38	c("OR1L6", "OR9A4", "OR5B21", "OR51V1", "OR2AP1", "OR10AG1", "OR2AE1", "OR5AU1", "OR2K2", "OR1Q1", "OR1E1", "OR2AG2", "OR51L1", "OR5AN1", "OR2M7", "OR5W2", "OR2W3", "OR10A5", "OR5J2", "OR51B2", "OR2A14", "OR14J1", "OR2Y1", "OR56B4", "OR4P4", "OR4C16", "OR4D2", "OR9Q1", "OR2C3", "OR1M1", "OR9Q2", "OR5K2", "OR8H3")
667	REGULATION OF NUCLEASE ACTIVITY%GO%GO:0032069	1.317e-06	6.51684e-06	0.643552	0.455032	2.44228	52	c("CCL2", "ATF3", "TSPYL2", "ATF4", "ASNS", "SRPRB", "XBP1", "DNAJB9", "ADD1", "LMNA", "HDGF", "ATF6", "DNAJC3", "HSP90B1", "SSR1", "KLHDC3", "SERP1", "CALR", "WFS1", "SHC1", "FKBP14", "PDIA6", "ACADVL", "OAS1", "CXXC1", "EIF2S1", "HERPUD1", "HYOU1", "EDEM1", "HSPA5", "YIF1A", "ATP6V0D1", "DNAJB11", "PDIA5", "ZBTB17", "PREB", "GOSR2", "PLA2G4B", "C19ORF10", "OAS3", "IL8", "TLN1", "ARFGAP1", "TATD…
668	POSITIVE REGULATION OF UBIQUITIN-PROTEIN LIGASE ACTIVITY INVOLVED IN MITOTIC CELL CYCLE%GO%GO:0051437	1.31837e-06	6.51684e-06	0.643552	0.477824	2.42671	42	c("PSME2", "PSMD8", "PSMB8", "PTEN", "PSME4", "PSMA4", "PSME1", "PSMA6", "PSMB6", "PSMD14", "PSMA3", "ANAPC7", "PSMD2", "PSMA5", "PSMD12", "FBXO5", "PSMD13", "ANAPC5", "PSME3", "PSMB3", "PSMB5", "UBA52", "PSMC3", "PSMB9", "PSMB1", "PSMA7", "PSMD9", "PSMC4", "PSMD3", "CDC20", "PSMC5", "UBE2E1")
669	NUCLEOTIDE-BINDING DOMAIN, LEUCINE RICH REPEAT CONTAINING RECEPTOR (NLR) SIGNALING PATHWAYS%REACTOME%REACT_75913.2	1.33395e-06	6.58403e-06	0.643552	0.522103	2.51397	34	c("BIRC3", "IRAK1", "NOD2", "BCL2L1", "CASP4", "PSTPIP1", "PYCARD", "RIPK2", "MAPK13", "ITCH", "TXN", "NFKB1", "NLRP3", "CHUK", "RELA", "BIRC2", "NLRC4", "IRAK2", "CASP1", "NFKB2", "MEFV", "TMEM189-UBE2V1", "MAPK14", "TNFAIP3", "IKBKB", "PANX1", "CASP2", "IKBKG")
670	TRIF-DEPENDENT TOLL-LIKE RECEPTOR SIGNALING PATHWAY%GO%GO:0035666	1.36078e-06	6.7064e-06	0.643552	0.483754	2.53381	47	c("TLR4", "IRAK1", "NOD2", "LY96", "RPS6KA2", "MAP2K1", "RIPK2", "NFKBIA", "NFKBIB", "CD14", "RPS6KA1", "RIPK1", "MAPKAPK3", "MAP2K4", "NFKB1", "ELK1", "DUSP7", "TICAM2", "CHUK", "MAP2K3", "JUN", "RELA", "FOS", "MAP2K2", "MAPK7", "UBA52", "IRAK2", "MAPK9", "NFKB2", "TICAM1", "MAPKAPK2", "MAPK14", "IKBKB", "CREB1", "IRF7", "IKBKG", "IKBKE", "MAPK3")
671	APOPTOSIS%REACTOME%REACT_578.6	1.3728e-06	6.75557e-06	0.643552	0.375836	2.26112	93	c("PPP3CC", "PRKCD", "PSME2", "BCL2L1", "PSMD8", "TNFRSF1A", "BID", "ADD1", "PSMB8", "BAD", "YWHAH", "PSME4", "PSMA4", "HIST1H1C", "PSME1", "PSMA6", "RIPK1", "YWHAZ", "PAK2", "BAK1", "LMNB1", "PSMB6", "CASP7", "NMT1", "PSMD14", "PSMA3", "FADD", "PSMD2", "DIABLO", "PSMA5", "PSMD12", "VIM", "KPNB1", "BIRC2", "PSMD13", "PSME3", "YWHAB", "TRADD", "PSMB3", "BCAP31", "PSMB5", "UBA52", "KPNA1", "CFLAR",…
672	PLATELET DEGRANULATION%GO%GO:0002576	1.40829e-06	6.91654e-06	0.643552	0.45735	2.46711	53	c("CFD", "F13A1", "SYK", "F5", "SRGN", "F8", "PLEK", "SERPINA1", "THBS1", "ALDOA", "SERPINE1", "WDR1", "TIMP1", "PSAP", "CD63", "CAP1", "SERPING1", "VWF", "FN1", "ITGB3", "CFL1", "LYN", "TUBA4A", "CALU", "PFN1", "PPIA", "ABCC4", "CALM2", "A2M", "TMSB4X", "TF", "STXBP1", "SPARC", "HSPA5", "CALM3", "SERPINF2")
673	PROTEIN HOMODIMERIZATION ACTIVITY%GO%GO:0042803	1.41179e-06	6.91654e-06	0.643552	0.300546	2.03556	207	c("PDGFRA", "CBS", "SLC11A1", "SLC9A7", "CSF1R", "PLEK", "HMOX1", "SHMT1", "ABCG1", "IL6R", "IRAK1", "G6PD", "TKT", "SLC4A3", "IMPA2", "CALCOCO2", "GLA", "TESC", "GCA", "HM13", "IDH1", "PRKRA", "CD4", "MLX", "ZBTB16", "RAP1GAP", "IRAK3", "CORO1A", "CADM3", "DGKD", "RPS19", "ADD1", "SH3GLB1", "DPYD", "PYCARD", "TAP1", "RIPK2", "PDE2A", "ABCD3", "KCNN2", "S100A11", "TRIM37", "CLIP1", "PYGL", "MSH6"…
674	RESPONSE TO ABIOTIC STIMULUS%GO%GO:0009628	1.41179e-06	6.91654e-06	0.643552	0.300573	2.03575	207	c("BMP7", "BLM", "CCL11", "CDS1", "GLRX2", "ANGPTL4", "MYC", "CDKN1A", "TLR4", "HMOX1", "DDIT4", "XRCC4", "AQP9", "ADA", "HIF1A", "THBS1", "OPN3", "DCUN1D3", "DDX3X", "PTGIS", "IRF1", "TNFRSF10A", "LTBR", "TNFRSF1A", "BCL3", "TLR8", "SLC11A2", "HVCN1", "GRB2", "HYAL2", "PLOD2", "HIPK2", "NKX3-1", "EGLN1", "UBE2D3", "LMNA", "IFI16", "GPX1", "PDE2A", "RHOB", "BAD", "SLC9A1", "MAPK13", "NFKBIA", "MS…
675	IL3%NETPATH%IL3	1.44372e-06	7.06246e-06	0.643552	0.456948	2.46494	53	c("SOCS3", "SLC2A1", "SYK", "FCER1G", "STAT3", "BCL2L1", "GRB2", "FES", "RARA", "JAK1", "MAP2K1", "DOK2", "BAD", "RXRA", "YWHAZ", "GATA2", "LYN", "NFKB1", "HCK", "INPP5D", "KCNIP3", "DOK1", "SHC1", "FOXO3", "YWHAB", "PTPN6", "SOS1", "CRKL", "RAF1", "VAV1", "STAT5A", "BAX", "MAPK14", "IL3RA", "RAPGEF1", "PPP3CA", "CREB1", "PTPRC", "HSPB1", "MAPK3", "PIK3CD", "FOXO1")
676	CYTOSKELETON ORGANIZATION%GO%GO:0007010	1.44602e-06	7.06325e-06	0.643552	0.295356	2.02015	223	c("CCL2", "MYH6", "CCL11", "FGF7", "FGD2", "DOCK2", "WAS", "PDGFRA", "NCKAP1L", "PARVB", "PLEK", "PCNT", "NEDD9", "PALLD", "EPB41L3", "ALDOA", "TUBG1", "CXCL1", "PREX1", "SDCBP", "CDK2", "NF2", "SH3KBP1", "AIF1", "CORO1C", "CORO1A", "PHACTR1", "FERMT2", "ARHGDIB", "ADD1", "EPB41L4B", "AURKA", "EPS8", "PAWR", "CDC42EP2", "LMNA", "TPPP", "PTEN", "CLIP1", "NEK6", "ARPC5", "KRT8", "KIF20A", "SSH2", "…
677	UBIQUITIN-DEPENDENT DEGRADATION OF CYCLIN D%REACTOME%REACT_938.4	1.45058e-06	7.06463e-06	0.643552	0.540602	2.55874	32	c("PSME2", "PSMD8", "PSMB8", "PSME4", "PSMA4", "PSME1", "PSMA6", "PSMB6", "PSMD14", "PSMA3", "PSMD2", "PSMA5", "PSMD12", "PSMD13", "PSME3", "PSMB3", "PSMB5", "UBA52", "PSMC3", "PSMB9", "PSMB1", "PSMA7", "PSMD9", "PSMC4", "PSMD3", "PSMC5")
678	UBIQUITIN-DEPENDENT DEGRADATION OF CYCLIN D1%REACTOME%REACT_4.1	1.45058e-06	7.06463e-06	0.643552	0.540602	2.55874	32	c("PSME2", "PSMD8", "PSMB8", "PSME4", "PSMA4", "PSME1", "PSMA6", "PSMB6", "PSMD14", "PSMA3", "PSMD2", "PSMA5", "PSMD12", "PSMD13", "PSME3", "PSMB3", "PSMB5", "UBA52", "PSMC3", "PSMB9", "PSMB1", "PSMA7", "PSMD9", "PSMC4", "PSMD3", "PSMC5")
679	GTPASE REGULATOR ACTIVITY%GO%GO:0030695	1.49067e-06	7.24917e-06	0.643552	0.351664	2.1941	115	c("FGD2", "DOCK2", "NCKAP1L", "SPATA13", "PREX1", "AXIN2", "TBC1D2", "RGS19", "RGS18", "RGS10", "RGS1", "ERRFI1", "CDC42EP2", "IPO7", "TRIO", "ARL2BP", "RGS2", "ITSN1", "ADAP2", "IQGAP1", "IPO5", "RAB3IL1", "OCRL", "ARHGAP4", "ARHGAP9", "SH3BP4", "PSD4", "FGD3", "ECT2", "SBF1", "DENND2D", "SIPA1", "JUN", "DOCK5", "EIF2B4", "RP2", "PTGIR", "MYO9B", "EIF2B5", "DENND3", "ARFGAP3", "RACGAP1", "SLIT2"…
680	IL5%NETPATH%IL5	1.4993e-06	7.27093e-06	0.643552	0.501251	2.52668	41	c("SYK", "STAT3", "HCLS1", "ALOX5", "BTK", "PRKCD", "SOCS1", "SDCBP", "GRB2", "JAK1", "NFKBIA", "RPS6KA1", "YWHAZ", "LYN", "NFKB1", "HCK", "ELK1", "JUN", "SHC1", "FOXO3", "PLA2G4A", "MAP2K2", "DNM2", "PTPN6", "SOS1", "CRKL", "RAF1", "VAV1", "STAT5A", "BAX", "MAPK14")
681	CROSS-PRESENTATION OF SOLUBLE EXOGENOUS ANTIGENS (ENDOSOMES)%REACTOME%REACT_111056.1	1.49955e-06	7.27093e-06	0.643552	0.52137	2.51044	34	c("PSME2", "PSMD8", "PSMB8", "PSME4", "PSMA4", "PSME1", "PSMA6", "PSMB6", "PSMD14", "PSMA3", "PSMD2", "PSMA5", "PSMD12", "FCGR1A", "PSMD13", "PSME3", "FCGR1B", "PSMB3", "PSMB5", "PSMC3", "PSMB9", "PSMB1", "PSMA7", "PSMD9", "PSMC4", "PSMD3", "PSMC5")
682	REGULATION OF NUCLEOSIDE METABOLIC PROCESS%GO%GO:0009118	1.50186e-06	7.27146e-06	0.643552	0.361266	2.20823	99	c("MYH6", "CCL11", "FGD2", "NCKAP1L", "PLSCR1", "MYL4", "CCL21", "PREX1", "AXIN2", "TBC1D2", "PID1", "RGS19", "RGS10", "UHRF1", "MYL3", "RAP1GAP", "RGS1", "PLXNB1", "MYBPC3", "ERRFI1", "CDC42EP2", "RGS2", "RANGAP1", "ADAP2", "IQGAP1", "TMED2", "OCRL", "ARHGAP4", "ARHGAP9", "SH3BP4", "FGD3", "DNAJC1", "ECT2", "AHSA1", "SIPA1", "JUN", "RP2", "ERBB2", "MYO9B", "RHOG", "TPM2", "RACGAP1", "SOS1", "ARH…
683	CELLULAR RESPONSE TO ORGANIC NITROGEN%GO%GO:0071417	1.50487e-06	7.27539e-06	0.643552	0.345345	2.1713	119	c("NAMPT", "SOCS3", "FGF7", "EIF4EBP1", "PPARG", "STAT3", "ADCY3", "AQP9", "PRKAR2A", "SOCS1", "EIF4G1", "MYO5A", "PDK4", "GRB2", "GNG12", "ATP6V1A", "MAP2K1", "PDE2A", "CAB39L", "BAD", "EEF2K", "BAIAP2", "ATP6V0A2", "HSP90B1", "SH3BP4", "STRADB", "LYN", "ADCY1", "RPS6", "PTPN1", "ATP6V0A1", "ATP6V1F", "IRS2", "TCIRG1", "NRAS", "PRKAG1", "DOK1", "ATP6V0C", "PRKCI", "PDE3A", "SHC1", "FOXO3", "ADIP…
684	REGULATION OF LEUKOCYTE PROLIFERATION%GO%GO:0070663	1.50778e-06	7.27877e-06	0.643552	0.480546	2.46838	44	c("NCKAP1L", "CD38", "CD209", "EBI3", "IRF1", "CD276", "IL10", "AIF1", "LILRB2", "CD74", "SOX11", "PYCARD", "GSTP1", "CSF1", "MNDA", "CD274", "CLCF1", "LYN", "IL6ST", "IRS2", "IGFBP2", "AHR", "LILRB1", "IL6", "MIF", "IL18", "LST1", "IL1B", "TNFSF4", "TNFAIP3", "CCL19", "PTPRC", "IL12RB1", "CD28", "TCF3")
685	REGULATION OF ESTABLISHMENT OF PROTEIN LOCALIZATION%GO%GO:0070201	1.52207e-06	7.33706e-06	0.643552	0.349516	2.18798	117	c("BMP7", "WNK3", "SRGN", "CSF1R", "HCLS1", "TLR4", "LCP1", "NKD2", "RHBDF2", "TLR2", "NOD2", "DAB2", "PPP2R5A", "AXIN2", "PID1", "FGR", "BCL2L1", "BCL3", "IL10", "SNAI2", "NDFIP2", "SPHK1", "WNT5A", "HYAL2", "CABP1", "SYTL4", "PYCARD", "PDE2A", "RANGAP1", "NFKBIA", "DPH3", "UHMK1", "SFRP5", "CD274", "EXPH5", "TXN", "NR1H3", "DNAJC1", "ECT2", "NLRP3", "ACSL3", "CSK", "PPIA", "ANG", "PRKCI", "LILR…
686	AUTODEGRADATION OF THE E3 UBIQUITIN LIGASE COP1%REACTOME%REACT_20549.1	1.53634e-06	7.39506e-06	0.643552	0.520837	2.50787	34	c("PSME2", "PSMD8", "PSMB8", "PSME4", "PSMA4", "PSME1", "PSMA6", "PSMB6", "PSMD14", "PSMA3", "PSMD2", "PSMA5", "PSMD12", "PSMD13", "PSME3", "RFWD2", "PSMB3", "PSMB5", "UBA52", "PSMC3", "PSMB9", "PSMB1", "PSMA7", "PSMD9", "PSMC4", "PSMD3", "PSMC5")
687	UNSATURATED FATTY ACID BIOSYNTHETIC PROCESS%GO%GO:0006636	1.54168e-06	7.40995e-06	0.643552	0.666153	2.56175	16	c("GGT5", "ALOX5", "EDN1", "ALOX5AP", "PTGIS", "CD74", "PNPLA8", "PTGS1", "PTGDS", "EDN2", "DEGS1", "FADS3", "PTGS2", "MIF", "PTGES")
688	Hematopoietic cell lineage%KEGG%hsa04640	1.56772e-06	7.52414e-06	0.643552	0.455085	2.45489	53	c("CD38", "ANPEP", "CSF1R", "IL1R1", "CD59", "IL6R", "TFRC", "ITGAM", "ITGA5", "HLA-DRA", "CD44", "IL1R2", "ITGA2", "CD4", "CSF2RA", "ITGA3", "CD33", "CD55", "IL4R", "IL2RA", "TPO", "HLA-DRB4", "CSF1", "CD14", "ITGB3", "CD37")
689	TRANSITION METAL ION TRANSPORT%GO%GO:0000041	1.59841e-06	7.6603e-06	0.643552	0.524262	2.49694	33	c("SLC11A1", "SCARA5", "TFRC", "SLC39A8", "SLC39A14", "SLC31A2", "SLC31A1", "STEAP3", "CLTC", "SLC11A2", "ABCB6", "ATP6V1A", "SLC39A1", "ATP6V0A2", "ATP6V0A1", "ATP6V1F", "TCIRG1", "ATP6V0C", "MCOLN1", "DNM2", "TF", "ATP6V0B", "MT3", "ATP6V0D1", "ATP6V1B2", "TTYH1")
690	CELLULAR CHEMICAL HOMEOSTASIS%GO%GO:0055082	1.66848e-06	7.97298e-06	0.643552	0.308679	2.05596	181	c("HK2", "ATP2A2", "CCL11", "S1PR3", "S100A9", "HK3", "PDGFRA", "SLC11A1", "S100A8", "CCR1", "MYC", "HMOX1", "EDN1", "C3AR1", "SCARA5", "TFRC", "CCL21", "SLC4A3", "EPB41L3", "SLC39A14", "AGTR1", "PID1", "BCL2L1", "P2RY2", "STEAP3", "GNA15", "SLC11A2", "MT2A", "CD55", "LPAR1", "ABCB6", "MAL", "ATP6V1A", "GPR89B", "PTEN", "FTL", "BAD", "SLC9A1", "CCL8", "CLCN3", "CAV1", "ITPR3", "LTF", "GPR89A", "A…
691	SEQUENCE-SPECIFIC DNA BINDING TRANSCRIPTION FACTOR ACTIVITY%GO%GO:0003700	1.66848e-06	7.97298e-06	0.643552	0.282532	1.94411	240	c("HEY2", "ENO1", "IRF8", "SREBF1", "BCL6", "PPARG", "MYC", "STAT3", "PLSCR1", "TFE3", "HIF1A", "TCF21", "ARNTL", "ATF4", "TEAD2", "RORB", "SPI1", "NR4A3", "RUNX3", "SNAI2", "MLX", "UHRF1", "HNRNPAB", "WNT5A", "UBN1", "MSC", "NKX3-1", "RARA", "SOX11", "NKX2-5", "ESRRA", "NME1-NME2", "AFF1", "ELF4", "ZNF189", "E2F4", "FOXK2", "TEAD4", "PA2G4", "RXRA", "ZSCAN5A", "KLF2", "CBFB", "GATA2", "LMO4", "N…
692	SIGNALING BY FGFR IN DISEASE%REACTOME%REACT_120736.3	1.68362e-06	8.03369e-06	0.643552	0.407239	2.37862	75	c("FGF7", "PDGFRA", "STAT3", "CDKN1A", "ADCY3", "CD86", "IL6R", "PRKAR2A", "PIK3R3", "PRKCD", "JAK1", "MAP2K1", "PPP2CB", "PTEN", "BAD", "RPS6KB2", "ITPR3", "PDGFRB", "ADCY1", "NR4A1", "IRS2", "NRAS", "CHUK", "CALM2", "ERBB2", "FOXO3", "MAP2K2", "IL6", "ADCY7", "YWHAB", "SOS1", "KRAS", "UBA52", "RAF1", "KLB", "VAV1", "STAT5A", "PRKCE", "BCR", "MAPKAP1", "CALM3", "MDM2", "PDE1B", "ADCY9", "TRIB3",…
693	PROTEOLYSIS INVOLVED IN CELLULAR PROTEIN CATABOLIC PROCESS%GO%GO:0051603	1.68897e-06	8.04758e-06	0.643552	0.328957	2.11871	140	c("RNF144B", "CDK2", "PSME2", "HECTD1", "PSMD8", "UHRF1", "DNAJB9", "PSMB8", "DERL1", "AURKA", "UCHL3", "UBE2D3", "PSME4", "SEC61B", "ITCH", "FBXO6", "PSMA4", "PSME1", "PSMA6", "UBE3C", "HSP90B1", "TRIM13", "PSMB6", "UBE2J1", "PSMD14", "PSMA3", "TNFAIP1", "SIRT2", "ANAPC7", "RHBDD1", "PSMD2", "RNF6", "WFS1", "PSMA5", "PSMD12", "BIRC2", "KEAP1", "FBXO5", "PSMD13", "ANAPC5", "PSME3", "VCP", "UBE2G1…
694	COMPLEMENT CASCADE%REACTOME%REACT_6932.5	1.70706e-06	8.12205e-06	0.643552	0.625823	2.53004	19	c("C3", "CFD", "C1R", "C1QC", "C1S", "C7", "C1QA", "C1QB", "CD55", "C2", "CFI", "C6", "CR1")
695	CELLULAR MODIFIED AMINO ACID METABOLIC PROCESS%GO%GO:0006575	1.72337e-06	8.18785e-06	0.643552	0.419608	2.38718	67	c("LPCAT3", "PLA2G2A", "PTDSS1", "GGT5", "GLRX2", "GNMT", "CBS", "PLSCR1", "SHMT1", "P4HB", "G6PD", "ALOX5AP", "LPCAT4", "CKB", "FASN", "CNDP2", "GCLM", "EIF5A", "EGLN1", "CKM", "TPO", "GPX1", "VNN2", "MTHFR", "GSTP1", "MTHFD2", "SLC5A6", "PLA2G5", "GGCT", "PLA1A", "MTHFD1L", "MBOAT1", "PLA2G4F", "PLA2G4A", "PANK2", "GSS", "COASY", "DOHH", "CCBL1", "STAT5A", "SEPHS2", "PLOD1")
696	NEURONAL SYSTEM%REACTOME%REACT_13685.3	1.72845e-06	8.20022e-06	0.643552	0.363037	2.24048	106	c("CACNA2D3", "KCNK1", "SLC38A1", "ADCY3", "GLUL", "SLC1A3", "HCN4", "SLC38A2", "KCNJ8", "GABBR2", "KCNH2", "KCNK3", "RPS6KA2", "GRIN2A", "NCALD", "GNG12", "GRIK2", "SLC1A1", "KCNN2", "PLCB2", "KCNQ3", "KCNJ5", "STX12", "RPS6KA1", "ADCY1", "GABRB3", "GRIK3", "PICK1", "CACNB3", "STX2", "CACNA1E", "CHRNA5", "CALM2", "DNAJC5", "KCNJ12", "GNAI2", "ADCY7", "STX5", "NSF", "KCNA7", "HSPA8", "KCNJ11", "S…
697	TISSUE DEVELOPMENT%GO%GO:0009888	1.73693e-06	8.22862e-06	0.643552	0.278744	1.91911	247	c("MYH6", "BMP7", "NAMPT", "ATP2A2", "FGF7", "KLHL3", "WAS", "PDGFRA", "OSR1", "HEY2", "PDE4D", "ZBTB7B", "PPARG", "MYC", "CSF1R", "ACVRL1", "TGFBR3", "BTK", "HIF1A", "TCF21", "TGFBR2", "ITGA5", "DUSP2", "FABP5", "CLIC4", "DUSP1", "CD44", "ZNF703", "SPP1", "SNAI2", "ZBTB16", "MYL3", "HNRNPAB", "WNT5A", "HYAL2", "COL5A3", "MUSK", "NKX3-1", "AKR1C3", "ABCB6", "MYBPC3", "LAMC2", "ERRFI1", "SOX11", "…
698	REGULATION OF UBIQUITIN-PROTEIN LIGASE ACTIVITY%GO%GO:0051438	1.83361e-06	8.67416e-06	0.643552	0.443488	2.40325	55	c("CDK2", "PSME2", "PSMD8", "PSMB8", "PTEN", "PSME4", "PSMA4", "PSME1", "PSMA6", "PSMB6", "PSMD14", "PSMA3", "FEM1A", "FEM1B", "ANAPC7", "PSMD2", "MAD2L2", "PSMA5", "PSMD12", "FBXO5", "PSMD13", "ANAPC5", "PSME3", "PSMB3", "PSMB5", "UBA52", "BAG5", "PSMC3", "PSMB9", "PSMB1", "PSMA7", "PSMD9", "TRIB3", "PSMC4", "PSMD3", "AXIN1", "CDC20", "PSMC5")
699	ION HOMEOSTASIS%GO%GO:0050801	1.84011e-06	8.69249e-06	0.643552	0.30628	2.04128	182	c("ATP2A2", "CCL11", "S1PR3", "S100A9", "PDGFRA", "SLC11A1", "SLC9A7", "S100A8", "CCR1", "MYC", "HMOX1", "EDN1", "C3AR1", "SCARA5", "TFRC", "CCL21", "SLC7A8", "SLC4A3", "EPB41L3", "SLC39A14", "AGTR1", "PID1", "BCL2L1", "P2RY2", "STEAP3", "GNA15", "SLC11A2", "PDK4", "MT2A", "CD55", "LPAR1", "ABCB6", "MAL", "ATP6V1A", "GPR89B", "PTEN", "FTL", "BAD", "SLC9A1", "CCL8", "CLCN3", "CAV1", "ITPR3", "LTF"…
700	CATION HOMEOSTASIS%GO%GO:0055080	1.84564e-06	8.70617e-06	0.643552	0.338538	2.1551	127	c("ATP2A2", "CCL11", "S1PR3", "S100A9", "PDGFRA", "SLC11A1", "SLC9A7", "S100A8", "CCR1", "MYC", "HMOX1", "EDN1", "C3AR1", "SCARA5", "TFRC", "CCL21", "SLC7A8", "SLC39A14", "AGTR1", "STEAP3", "GNA15", "SLC11A2", "PDK4", "MT2A", "CD55", "LPAR1", "ABCB6", "ATP6V1A", "GPR89B", "FTL", "SLC9A1", "CCL8", "CLCN3", "CAV1", "ITPR3", "LTF", "GPR89A", "ATP6V0A2", "HSP90B1", "HP", "DMPK", "JPH1", "CALR", "ATP6…
701	PLATELET DEGRANULATION%REACTOME%REACT_318.7	1.90678e-06	8.98174e-06	0.643552	0.449873	2.38404	49	c("CFD", "F13A1", "F5", "SRGN", "F8", "PLEK", "SERPINA1", "THBS1", "ALDOA", "SERPINE1", "WDR1", "TIMP1", "PSAP", "CD63", "CAP1", "SERPING1", "VWF", "FN1", "ITGB3", "CFL1", "TUBA4A", "CALU", "PFN1", "PPIA", "ABCC4", "CALM2", "A2M", "TMSB4X", "TF", "SPARC", "HSPA5", "CALM3", "SERPINF2")
702	UBIQUITIN-DEPENDENT PROTEIN CATABOLIC PROCESS%GO%GO:0006511	1.91656e-06	9.01492e-06	0.627257	0.330631	2.114	132	c("RNF144B", "CDK2", "PSME2", "HECTD1", "PSMD8", "UHRF1", "DNAJB9", "PSMB8", "DERL1", "AURKA", "UCHL3", "UBE2D3", "PSME4", "SEC61B", "ITCH", "FBXO6", "PSMA4", "PSME1", "PSMA6", "UBE3C", "HSP90B1", "TRIM13", "PSMB6", "UBE2J1", "PSMD14", "PSMA3", "TNFAIP1", "SIRT2", "ANAPC7", "RHBDD1", "PSMD2", "RNF6", "WFS1", "PSMA5", "PSMD12", "BIRC2", "FBXO5", "PSMD13", "ANAPC5", "PSME3", "VCP", "UBE2G1", "FBXO7…
703	CARBOXYLIC ACID TRANSPORT%GO%GO:0046942	1.92622e-06	9.03462e-06	0.627257	0.390418	2.31196	83	c("SLC1A5", "PDPN", "SLC11A1", "PPARG", "SLC38A1", "SLC36A4", "SLC1A3", "SLC36A1", "AQP9", "SLC38A2", "SLC7A8", "SLC6A6", "FOLR2", "ABCC3", "FABP6", "SLC7A1", "ACACB", "SLC25A13", "AKR1C3", "PNPLA8", "SLC1A1", "SLC36A2", "SLC3A2", "SLC25A15", "SLC7A7", "SLC25A26", "SLC7A5", "SH3BP4", "SLC38A5", "SLC16A3", "SLC7A2", "SLC22A5", "ACSL3", "SLC38A4", "SLC25A1", "SLC22A4", "STX1A", "STXBP1", "CLN3", "S…
704	ORGANIC ACID TRANSPORT%GO%GO:0015849	1.92622e-06	9.03462e-06	0.627257	0.390418	2.31196	83	c("SLC1A5", "PDPN", "SLC11A1", "PPARG", "SLC38A1", "SLC36A4", "SLC1A3", "SLC36A1", "AQP9", "SLC38A2", "SLC7A8", "SLC6A6", "FOLR2", "ABCC3", "FABP6", "SLC7A1", "ACACB", "SLC25A13", "AKR1C3", "PNPLA8", "SLC1A1", "SLC36A2", "SLC3A2", "SLC25A15", "SLC7A7", "SLC25A26", "SLC7A5", "SH3BP4", "SLC38A5", "SLC16A3", "SLC7A2", "SLC22A5", "ACSL3", "SLC38A4", "SLC25A1", "SLC22A4", "STX1A", "STXBP1", "CLN3", "S…
705	FIBROBLAST GROWTH FACTOR RECEPTOR SIGNALING PATHWAY%GO%GO:0008543	1.96383e-06	9.19798e-06	0.627257	0.441074	2.418	57	c("FGF7", "FGF12", "ADCY3", "PRKAR2A", "PRKCD", "GRB2", "FGFRL1", "MAP2K1", "PPP2CB", "PTEN", "BAD", "RPS6KB2", "ITPR3", "ADCY1", "NR4A1", "NRAS", "CHUK", "SHC1", "CALM2", "FOXO3", "MAP2K2", "ADCY7", "YWHAB", "SOS1", "KRAS", "UBA52", "RAF1", "KLB", "PRKCE", "MAPKAP1", "CALM3", "MDM2", "PDE1B", "ADCY9", "TRIB3", "FGF5", "SPRY2", "KL", "SHCBP1", "CREB1", "FGFR4", "ADCY4", "MAPK3", "FOXO1")
706	REGULATION OF MITOTIC CELL CYCLE%GO%GO:0007346	1.98165e-06	9.26827e-06	0.627257	0.327686	2.11053	140	c("BMP7", "EIF4EBP1", "TGFA", "PIM1", "BCL6", "CDKN1A", "EDN1", "DCUN1D3", "GAS1", "DDX3X", "CDK2", "PID1", "PSME2", "ASNS", "PSMD8", "SPHK1", "AIF1", "PSMB8", "AURKA", "EPS8", "RBM38", "NKX3-1", "USP2", "PTEN", "NEK6", "PSME4", "SMARCA4", "PSMA4", "CAV2", "PSME1", "PSMA6", "PDGFRB", "PSMB6", "CRLF3", "PSMD14", "PSMA3", "AURKAIP1", "CDC25B", "MAEA", "SIRT2", "ANAPC7", "PSMD2", "MAD2L2", "BTG3", "…
707	Prostate cancer%KEGG%hsa05215	2.01579e-06	9.41462e-06	0.627257	0.452688	2.40959	51	c("PDGFRA", "TGFA", "CDKN1A", "PIK3R3", "ATF4", "CDK2", "GRB2", "NKX3-1", "MAP2K1", "PTEN", "BAD", "NFKBIA", "GSTP1", "PIK3R5", "HSP90AA1", "PDGFRB", "HSP90B1", "NFKB1", "E2F3", "NRAS", "CHUK", "RELA", "ERBB2", "CREB3L1", "MAP2K2", "SOS1", "KRAS", "RAF1", "ARAF", "MDM2", "CREB3", "CCNE1", "IKBKB", "CREB1", "IKBKG", "E2F2", "MAPK3", "PIK3CD", "TP53", "FOXO1")
708	NEGATIVE REGULATION OF PROTEIN PHOSPHORYLATION%GO%GO:0001933	2.12802e-06	9.92474e-06	0.627257	0.378092	2.25016	85	c("BMP7", "SOCS3", "SAMSN1", "DDIT4", "PRKCD", "DUSP2", "SOCS1", "DUSP1", "PID1", "MVP", "DBNDD2", "NF2", "IRAK3", "HYAL2", "ERRFI1", "PYCARD", "GMFG", "PTEN", "RGS2", "DNAJC3", "CAV1", "GSTP1", "GMFB", "DUSP5", "PAK2", "LYN", "DUSP7", "SNX6", "ZGPAT", "MLXIPL", "ENG", "ADIPOQ", "DKK1", "PTPN6", "SLIT2", "ABL1", "ADAR", "GPS2", "TRIM27", "IL1B", "STK38", "SEMA4D", "PPM1F", "TRIB3", "WWTR1", "GBA"…
709	CELL CYCLE PHASE TRANSITION%GO%GO:0044770	2.16045e-06	1.00476e-05	0.627257	0.346068	2.17385	118	c("EIF4EBP1", "BCAT1", "CDKN1A", "PCNT", "TUBG1", "CDK2", "PSME2", "PSMD8", "TUBB", "CDK6", "PSMB8", "CDC7", "POLA2", "TUBA1A", "PSMA4", "HSP90AA1", "PSME1", "PSMA6", "PSMB6", "PPP6C", "ACVR1B", "PSMD14", "PSMA3", "TUBA4A", "CDC25B", "GSPT1", "SSNA1", "PSMD2", "CDKN2D", "MCM8", "CSNK1E", "CEP135", "PSMA5", "PSMD12", "FBXO5", "PSMD13", "TUBGCP2", "ANAPC5", "PSME3", "DNM2", "ACTR1A", "CSNK1D", "BIR…
710	MITOTIC CELL CYCLE PHASE TRANSITION%GO%GO:0044772	2.16045e-06	1.00476e-05	0.627257	0.346068	2.17385	118	c("EIF4EBP1", "BCAT1", "CDKN1A", "PCNT", "TUBG1", "CDK2", "PSME2", "PSMD8", "TUBB", "CDK6", "PSMB8", "CDC7", "POLA2", "TUBA1A", "PSMA4", "HSP90AA1", "PSME1", "PSMA6", "PSMB6", "PPP6C", "ACVR1B", "PSMD14", "PSMA3", "TUBA4A", "CDC25B", "GSPT1", "SSNA1", "PSMD2", "CDKN2D", "MCM8", "CSNK1E", "CEP135", "PSMA5", "PSMD12", "FBXO5", "PSMD13", "TUBGCP2", "ANAPC5", "PSME3", "DNM2", "ACTR1A", "CSNK1D", "BIR…
711	Purine metabolism%KEGG%hsa00230	2.20386e-06	1.02207e-05	0.627257	0.382392	2.28674	88	c("PDE4B", "PDE4D", "ADCY3", "ENTPD6", "ADA", "PAPSS2", "NME1", "POLE4", "PAICS", "GUCY1A2", "NME1-NME2", "POLA2", "PDE2A", "PDE11A", "PPAT", "IMPDH1", "AK2", "CANT1", "NUDT5", "GART", "PGM2", "ADSS", "POLR3H", "ADCY1", "DGUOK", "APRT", "NME2", "PDE7A", "PDE3A", "ITPA", "PDE7B", "NT5E", "ADCY7", "POLR1D", "POLR2J", "POLR1C", "PNPT1", "PDE4A", "PRPS2", "PRPS1", "POLR2D", "POLD4", "POLE2", "NT5C1B"…
712	ZINC ION BINDING%GO%GO:0008270	2.20386e-06	1.02207e-05	0.627257	0.370933	2.23162	93	c("ADH1B", "S100A9", "MT1X", "S100A8", "ADA", "RPS27", "ABLIM3", "CD4", "TK1", "UHRF1", "MT2A", "GRIN2A", "S100A12", "CLIP1", "TRIM8", "DPP3", "ADAMTS3", "MT1M", "MT1G", "LIMS1", "PDXK", "ERAP2", "TES", "PTPN1", "CALR", "MT1A", "SIRT2", "LAP3", "MT1E", "MT1F", "ZNF207", "SKI", "ZNF90", "KPNB1", "BIRC2", "PAPPA", "OAS1", "MMP9", "RASSF1", "GCH1", "BIRC5", "MEFV", "TRIM28", "CA2", "ZNF24", "MT3", "…
713	NEUROLOGICAL SYSTEM PROCESS%GO%GO:0050877	2.21844e-06	1.02739e-05	0.627257	0.282473	1.95138	253	c("NPTX2", "KCNIP2", "KCNK1", "NQO1", "RDH10", "SLC38A1", "AGTPBP1", "ADCY3", "EFEMP1", "GLUL", "SLC1A3", "HCN4", "SLC38A2", "KCNJ8", "GABBR2", "EPB41L3", "KCNH2", "MAGT1", "SDCBP", "GCHFR", "WDR1", "KCNK3", "C5AR1", "SNAI2", "MARVELD2", "RPS6KA2", "VIPR1", "SOD2", "GRIN2A", "NCALD", "MUSK", "GNG12", "PMP22", "MAL", "GRIK2", "RPGR", "SLC1A1", "KCNN2", "PTEN", "ITSN1", "PLCB2", "KCNQ3", "RABGGTA",…
714	SYNTHESIS OF DNA%REACTOME%REACT_2014.3	2.22754e-06	1.03016e-05	0.627257	0.448908	2.37892	49	c("CDKN1A", "CDK2", "PSME2", "PSMD8", "PSMB8", "POLA2", "PSME4", "PSMA4", "PSME1", "PSMA6", "PSMB6", "PSMD14", "PSMA3", "PSMD2", "MCM8", "PSMA5", "PSMD12", "PSMD13", "PSME3", "PSMB3", "CDT1", "POLD4", "POLE2", "PSMB5", "UBA52", "PSMC3", "PSMB9", "PSMB1", "POLD1", "PSMA7", "PSMD9", "PSMC4", "PSMD3", "PSMC5", "MCM5", "LIG1", "FEN1")
715	Small cell lung cancer%KEGG%hsa05222	2.24849e-06	1.03839e-05	0.627257	0.472804	2.44078	45	c("BIRC3", "MYC", "PIK3R3", "ITGA2", "CDK2", "BCL2L1", "CDK6", "ITGA3", "COL4A4", "LAMC2", "PTEN", "ITGB1", "NFKBIA", "PIK3R5", "FN1", "RXRA", "LAMB3", "NFKB1", "E2F3", "CHUK", "RELA", "BIRC2", "PTGS2", "MAX", "COL4A2", "CKS1B", "PIAS4", "CCNE1", "LAMA5", "IKBKB", "IKBKG", "E2F2", "PIK3CD", "TP53", "COL4A1", "APAF1")
716	KINASE BINDING%GO%GO:0019900	2.32627e-06	1.07281e-05	0.627257	0.322002	2.0895	147	c("MYH6", "STAT3", "HCLS1", "PLEK", "GRK5", "ACVRL1", "HIF1A", "SOCS1", "NOD2", "PPP2R5A", "AXIN2", "FGR", "BCL2L1", "CD4", "MVP", "TPRKB", "CSPG4", "PPP1CC", "ITGB2", "GRB2", "RPS19", "ZFP36", "AURKA", "ERRFI1", "RARA", "FZD5", "JTB", "BAD", "IQGAP1", "NEK6", "RPS3", "GSTP1", "KIF20A", "MAPK4", "BTG1", "PAK2", "HINT1", "CCND3", "RPS6", "PTPN1", "MAPK8IP3", "CDC25B", "ACSL3", "PICK1", "PRKAG1", "…
717	MULTICELLULAR ORGANISMAL SIGNALING%GO%GO:0035637	2.35602e-06	1.08502e-05	0.627257	0.301083	2.01363	186	c("NPTX2", "KCNIP2", "KCNK1", "NQO1", "SLC38A1", "ADCY3", "GLUL", "SLC1A3", "HCN4", "SLC38A2", "KCNJ8", "GABBR2", "EPB41L3", "KCNH2", "SDCBP", "GCHFR", "KCNK3", "RPS6KA2", "VIPR1", "GRIN2A", "NCALD", "MUSK", "GNG12", "PMP22", "MAL", "GRIK2", "SLC1A1", "KCNN2", "PTEN", "ITSN1", "PLCB2", "KCNQ3", "KCNJ5", "STX12", "RPS6KA1", "AP2S1", "ADCY1", "SYPL1", "GABRB3", "GRIK3", "PICK1", "CACNB3", "CACNA1E"…
718	DOWNSTREAM SIGNALING OF ACTIVATED FGFR%REACTOME%REACT_21272.4	2.35934e-06	1.08503e-05	0.627257	0.425177	2.37702	63	c("FGF7", "PDGFRA", "CDKN1A", "ADCY3", "CD86", "IL6R", "PRKAR2A", "PIK3R3", "PRKCD", "JAK1", "MAP2K1", "PTEN", "BAD", "RPS6KB2", "ITPR3", "PDGFRB", "ADCY1", "NR4A1", "IRS2", "NRAS", "CHUK", "CALM2", "ERBB2", "FOXO3", "MAP2K2", "IL6", "ADCY7", "YWHAB", "SOS1", "KRAS", "RAF1", "KLB", "VAV1", "PRKCE", "MAPKAP1", "CALM3", "MDM2", "PDE1B", "ADCY9", "TRIB3", "CREB1", "EREG", "CD28", "FGFR4", "ADCY4", "…
719	IL4%NETPATH%IL4	2.39239e-06	1.09558e-05	0.627257	0.472325	2.4383	45	c("SOCS3", "SYK", "STAT3", "BTK", "PRKCD", "SOCS1", "SPI1", "IL13RA1", "BCL2L1", "GRB2", "FES", "IL4R", "JAK1", "DOK2", "BAD", "NFKBIA", "NFKB1", "NCOA3", "ELK1", "INPP5D", "IRS2", "CHUK", "SND1", "RELA", "SHC1", "IL2RG", "PTPN6", "CEBPB", "SOS1", "STAT5A", "CD40", "MAPK14", "IKBKB", "ETS1", "MAPK3", "PIK3CD")
720	P53-INDEPENDENT DNA DAMAGE RESPONSE%REACTOME%REACT_2160.2	2.39554e-06	1.09558e-05	0.627257	0.518897	2.47138	33	c("PSME2", "PSMD8", "PSMB8", "PSME4", "PSMA4", "PSME1", "PSMA6", "PSMB6", "PSMD14", "PSMA3", "PSMD2", "PSMA5", "PSMD12", "PSMD13", "PSME3", "PSMB3", "PSMB5", "UBA52", "PSMC3", "PSMB9", "PSMB1", "PSMA7", "PSMD9", "PSMC4", "PSMD3", "PSMC5")
721	P53-INDEPENDENT G1 S DNA DAMAGE CHECKPOINT%REACTOME%REACT_1208.1	2.39554e-06	1.09558e-05	0.627257	0.518897	2.47138	33	c("PSME2", "PSMD8", "PSMB8", "PSME4", "PSMA4", "PSME1", "PSMA6", "PSMB6", "PSMD14", "PSMA3", "PSMD2", "PSMA5", "PSMD12", "PSMD13", "PSME3", "PSMB3", "PSMB5", "UBA52", "PSMC3", "PSMB9", "PSMB1", "PSMA7", "PSMD9", "PSMC4", "PSMD3", "PSMC5")
722	UBIQUITIN MEDIATED DEGRADATION OF PHOSPHORYLATED CDC25A%REACTOME%REACT_1614.4	2.39554e-06	1.09558e-05	0.627257	0.518897	2.47138	33	c("PSME2", "PSMD8", "PSMB8", "PSME4", "PSMA4", "PSME1", "PSMA6", "PSMB6", "PSMD14", "PSMA3", "PSMD2", "PSMA5", "PSMD12", "PSMD13", "PSME3", "PSMB3", "PSMB5", "UBA52", "PSMC3", "PSMB9", "PSMB1", "PSMA7", "PSMD9", "PSMC4", "PSMD3", "PSMC5")
723	NUCLEIC ACID BINDING TRANSCRIPTION FACTOR ACTIVITY%GO%GO:0001071	2.42481e-06	1.10743e-05	0.627257	0.28396	1.95491	241	c("HEY2", "ENO1", "IRF8", "SREBF1", "BCL6", "PPARG", "MYC", "STAT3", "PLSCR1", "TFE3", "HIF1A", "TCF21", "ARNTL", "ATF4", "TEAD2", "RORB", "SPI1", "NR4A3", "RUNX3", "SNAI2", "MLX", "UHRF1", "HNRNPAB", "WNT5A", "UBN1", "MSC", "NKX3-1", "RARA", "SOX11", "NKX2-5", "ESRRA", "NME1-NME2", "AFF1", "ELF4", "ZNF189", "E2F4", "FOXK2", "TEAD4", "PA2G4", "RXRA", "ZSCAN5A", "KLF2", "CBFB", "GATA2", "LMO4", "N…
724	RESPONSE TO ENDOPLASMIC RETICULUM STRESS%GO%GO:0034976	2.45671e-06	1.12045e-05	0.627257	0.415676	2.38272	69	c("CCL2", "ATF3", "TSPYL2", "ATF4", "ASNS", "SRPRB", "XBP1", "DNAJB9", "ADD1", "DERL1", "LMNA", "HDGF", "ATF6", "DNAJC3", "HSP90B1", "SSR1", "KLHDC3", "SERP1", "PTPN1", "CALR", "WFS1", "SHC1", "FKBP14", "PDIA6", "ACADVL", "CXXC1", "VCP", "EIF2S1", "CEBPB", "DERL2", "HERPUD1", "HYOU1", "EDEM1", "OS9", "HSPA5", "YIF1A", "BAX", "TNFRSF10B", "AMFR", "ATP6V0D1", "TRIB3", "DNAJB11", "CREB3", "PDIA5", "…
725	REGULATION OF LIPID STORAGE%GO%GO:0010883	2.58995e-06	1.17959e-05	0.627257	0.594478	2.50874	22	c("C3", "APOB", "PPARG", "ABHD5", "ABCG1", "MSR1", "NR1H2", "OSBPL8", "EHD1", "NFKBIA", "ITGB3", "NR1H3", "NFKB1", "OSBPL11")
726	RAS PROTEIN SIGNAL TRANSDUCTION%GO%GO:0007265	2.67391e-06	1.21615e-05	0.627257	0.425287	2.36776	62	c("CDKN1A", "RHOD", "NGF", "AGTR1", "CDK2", "GRB2", "AIF1", "ARHGDIB", "EPS8", "MAP2K1", "GNA13", "RHOB", "MAPK13", "ARHGAP4", "MAPKAPK3", "CFL1", "G3BP1", "RAP2C", "NRAS", "PHACTR4", "SHC1", "MYO9B", "GNA12", "RALB", "MAP2K2", "RHOA", "YWHAB", "RASSF1", "RHOG", "SOS1", "KRAS", "CRKL", "RAF1", "RALGDS", "MAPKAPK2", "RALA", "RTKN", "RASGRP2", "MAPK14", "MAPKAPK5", "NTRK1", "GRAP", "GNB1", "ARHGEF1…
727	APC C:CDH1 MEDIATED DEGRADATION OF CDC20 AND OTHER APC C:CDH1 TARGETED PROTEINS IN LATE MITOSIS EARLY G1%REACTOME%REACT_6761.2	2.68862e-06	1.22116e-05	0.627257	0.493573	2.48798	41	c("PSME2", "PSMD8", "PSMB8", "AURKA", "PSME4", "PSMA4", "PSME1", "PSMA6", "PSMB6", "PSMD14", "PSMA3", "ANAPC7", "PSMD2", "PSMA5", "PSMD12", "PSMD13", "ANAPC5", "PSME3", "PTTG1", "PSMB3", "PSMB5", "UBA52", "PSMC3", "PSMB9", "PSMB1", "PSMA7", "PSMD9", "PSMC4", "PSMD3", "CDC20", "PSMC5", "UBE2E1")
728	IRON ION TRANSPORT%GO%GO:0006826	2.74885e-06	1.2468e-05	0.627257	0.607286	2.52492	21	c("SLC11A1", "SCARA5", "TFRC", "STEAP3", "CLTC", "SLC11A2", "ATP6V1A", "ATP6V0A2", "ATP6V0A1", "ATP6V1F", "TCIRG1", "ATP6V0C", "MCOLN1", "DNM2", "TF", "ATP6V0B", "ATP6V0D1", "ATP6V1B2", "TTYH1")
729	Endocytosis%KEGG%hsa04144	2.82288e-06	1.27862e-05	0.627257	0.347424	2.16765	115	c("PDGFRA", "CSF1R", "GRK5", "HSPA6", "TFRC", "TGFBR2", "FOLR2", "DAB2", "GIT2", "RNF41", "HSPA1B", "CLTC", "CBLB", "SH3KBP1", "EPN1", "SH3GLB1", "IL2RA", "SMAP2", "RAB11FIP1", "EHD1", "CAV1", "MET", "ITCH", "CAV2", "HLA-E", "PARD3", "RAB5A", "PSD4", "AP2S1", "GRK6", "FLT1", "HLA-A", "EPN2", "ASAP3", "SH3GL1", "ADRB1", "PRKCI", "VPS37B", "CDC42", "HLA-B", "CHMP7", "LDLR", "RHOA", "SNF8", "DNM2", …
730	CELLULAR RESPONSE TO INTERFERON-GAMMA%GO%GO:0071346	2.88381e-06	1.30443e-05	0.627257	0.436909	2.39517	57	c("CCL2", "SOCS3", "IFI30", "IRF8", "AQP4", "PRKCD", "SOCS1", "HLA-DRA", "CD44", "IRF1", "B2M", "WNT5A", "AIF1", "IFNGR1", "MT2A", "GBP1", "HLA-DPA1", "JAK1", "GBP2", "HLA-DRB4", "HLA-E", "HLA-DPB1", "HCK", "IRF5", "PTPN1", "HLA-A", "RPL13A", "HLA-B", "FCGR1A", "OAS1", "FCGR1B", "PTPN6", "PTPN2", "HLA-DRB3", "IFNGR2", "PTAFR", "DAPK1", "IRF7", "HLA-F", "IL12RB1", "IRF9", "OAS3", "HLA-DQA1", "HLA-…
731	APC C-MEDIATED DEGRADATION OF CELL CYCLE PROTEINS%REACTOME%REACT_6828.1	2.9373e-06	1.32319e-05	0.627257	0.462792	2.41431	46	c("CDK2", "PSME2", "PSMD8", "PSMB8", "AURKA", "PSME4", "PSMA4", "PSME1", "PSMA6", "PSMB6", "PSMD14", "PSMA3", "ANAPC7", "PSMD2", "PSMA5", "PSMD12", "FBXO5", "PSMD13", "ANAPC5", "PSME3", "PTTG1", "PSMB3", "PSMB5", "UBA52", "PSMC3", "PSMB9", "PSMB1", "PSMA7", "PSMD9", "PSMC4", "PSMD3", "CDC20", "PSMC5", "UBE2E1")
732	REGULATION OF MITOTIC CELL CYCLE%REACTOME%REACT_21279.2	2.9373e-06	1.32319e-05	0.627257	0.462792	2.41431	46	c("CDK2", "PSME2", "PSMD8", "PSMB8", "AURKA", "PSME4", "PSMA4", "PSME1", "PSMA6", "PSMB6", "PSMD14", "PSMA3", "ANAPC7", "PSMD2", "PSMA5", "PSMD12", "FBXO5", "PSMD13", "ANAPC5", "PSME3", "PTTG1", "PSMB3", "PSMB5", "UBA52", "PSMC3", "PSMB9", "PSMB1", "PSMA7", "PSMD9", "PSMC4", "PSMD3", "CDC20", "PSMC5", "UBE2E1")
733	REGULATION OF UBIQUITIN-PROTEIN LIGASE ACTIVITY INVOLVED IN MITOTIC CELL CYCLE%GO%GO:0051439	2.9373e-06	1.32319e-05	0.627257	0.462893	2.41483	46	c("CDK2", "PSME2", "PSMD8", "PSMB8", "PTEN", "PSME4", "PSMA4", "PSME1", "PSMA6", "PSMB6", "PSMD14", "PSMA3", "ANAPC7", "PSMD2", "MAD2L2", "PSMA5", "PSMD12", "FBXO5", "PSMD13", "ANAPC5", "PSME3", "PSMB3", "PSMB5", "UBA52", "PSMC3", "PSMB9", "PSMB1", "PSMA7", "PSMD9", "PSMC4", "PSMD3", "CDC20", "PSMC5", "UBE2E1")
734	MODIFICATION-DEPENDENT PROTEIN CATABOLIC PROCESS%GO%GO:0019941	2.94955e-06	1.3269e-05	0.627257	0.329037	2.10934	134	c("RNF144B", "CDK2", "PSME2", "HECTD1", "PSMD8", "UHRF1", "DNAJB9", "PSMB8", "DERL1", "AURKA", "UCHL3", "UBE2D3", "PSME4", "SEC61B", "ITCH", "FBXO6", "PSMA4", "PSME1", "PSMA6", "UBE3C", "HSP90B1", "TRIM13", "PSMB6", "UBE2J1", "PSMD14", "PSMA3", "TNFAIP1", "SIRT2", "ANAPC7", "RHBDD1", "PSMD2", "RNF6", "WFS1", "PSMA5", "PSMD12", "BIRC2", "FBXO5", "PSMD13", "ANAPC5", "PSME3", "VCP", "UBE2G1", "FBXO7…
735	ERBB SIGNALING PATHWAY%GO%GO:0038127	3.00817e-06	1.35142e-05	0.627257	0.387724	2.27431	79	c("REPS2", "ADCY3", "EFEMP1", "PRKAR2A", "PRKCD", "MVP", "CLTC", "SH3KBP1", "GRB2", "EPN1", "DGKD", "EPS8", "MAP2K1", "PTEN", "BAD", "RPS6KB2", "ITPR3", "AP2S1", "ADCY1", "NR4A1", "CSK", "NRAS", "CHUK", "SPRY1", "CDC42", "SHC1", "CALM2", "ERBB2", "FOXO3", "MAP2K2", "ADCY7", "CLTA", "YWHAB", "SOS1", "KRAS", "UBA52", "AP2A2", "RAF1", "BCAR1", "PRKCE", "MAPKAP1", "CALM3", "MDM2", "PDE1B", "ADCY9", "…
736	N-Glycan biosynthesis%KEGG%hsa00510	3.01579e-06	1.35301e-05	0.627257	0.536294	2.4828	30	c("ALG3", "RPN1", "MGAT4A", "RPN2", "ALG8", "MAN1A1", "ALG5", "B4GALT3", "DDOST", "MAN2A2", "MGAT1", "B4GALT1", "GANAB", "DAD1", "MGAT2", "STT3A", "DPAGT1", "MAN2A1", "ALG2", "DOLPP1", "RFT1", "ALG1", "ALG9", "ALG13")
737	INSULIN RECEPTOR SIGNALING PATHWAY%GO%GO:0008286	3.03267e-06	1.35874e-05	0.627257	0.427721	2.37244	60	c("NAMPT", "FGF7", "EIF4EBP1", "EIF4G1", "PDK4", "GRB2", "ATP6V1A", "MAP2K1", "CAB39L", "EEF2K", "BAIAP2", "ATP6V0A2", "STRADB", "RPS6", "ATP6V0A1", "ATP6V1F", "IRS2", "TCIRG1", "NRAS", "PRKAG1", "DOK1", "ATP6V0C", "SHC1", "FOXO3", "MAP2K2", "RHEB", "YWHAB", "SOS1", "KRAS", "CAB39", "ATP6V0B", "RAF1", "KLB", "BCAR1", "AP3S1", "ATP6V0D1", "TRIB3", "FGF5", "ATP6V1B2", "PRKAG2", "KL", "FGFR4", "MAPK…
738	APC C:CDC20 MEDIATED DEGRADATION OF SECURIN%REACTOME%REACT_6871.2	3.26071e-06	1.45892e-05	0.627257	0.489016	2.44398	40	c("PSME2", "PSMD8", "PSMB8", "PSME4", "PSMA4", "PSME1", "PSMA6", "PSMB6", "PSMD14", "PSMA3", "ANAPC7", "PSMD2", "PSMA5", "PSMD12", "PSMD13", "ANAPC5", "PSME3", "PTTG1", "PSMB3", "PSMB5", "UBA52", "PSMC3", "PSMB9", "PSMB1", "PSMA7", "PSMD9", "PSMC4", "PSMD3", "CDC20", "PSMC5", "UBE2E1")
739	CELLULAR PROTEIN CATABOLIC PROCESS%GO%GO:0044257	3.29123e-06	1.47059e-05	0.627257	0.328806	2.12998	145	c("RNF144B", "CDK2", "PSME2", "HECTD1", "PSMD8", "UHRF1", "DNAJB9", "PSMB8", "DERL1", "AURKA", "UCHL3", "UBE2D3", "PSME4", "SEC61B", "ITCH", "FBXO6", "PSMA4", "PSME1", "PSMA6", "RIPK1", "UBE3C", "HSP90B1", "TRIM13", "PSMB6", "UBE2J1", "PSMD14", "PSMA3", "TNFAIP1", "SIRT2", "ANAPC7", "RHBDD1", "PSMD2", "RNF6", "WFS1", "PSMA5", "PSMD12", "BIRC2", "KEAP1", "FBXO5", "PSMD13", "ANAPC5", "PSME3", "VCP"…
740	CYTOSKELETAL PART%GO%GO:0044430	3.31905e-06	1.48101e-05	0.627257	0.257746	1.81745	326	c("MYH6", "TUBA3D", "SPOCK1", "TSPYL2", "FERMT3", "TUBA1C", "PCNT", "MYL4", "NEDD9", "PALLD", "PRKAR2A", "G6PD", "CLIC4", "TUBG1", "ZYX", "CCT2", "RPP25", "AXIN2", "CDK2", "BCL2L1", "TUBA1B", "TUBB", "SRPRB", "CLTC", "MYL3", "AIF1", "CORO1A", "CABP1", "ADD1", "AURKA", "PAWR", "HIPK2", "MAP1B", "MYBPC3", "SYTL4", "LMNA", "NDRG2", "RPGR", "TUBB2A", "TPPP", "JTB", "TEK", "ARL2BP", "CLIP1", "ARPC1B",…
741	TRANSITION METAL ION BINDING%GO%GO:0046914	3.32903e-06	1.48346e-05	0.627257	0.331148	2.11773	131	c("ADH1B", "S100A9", "PIM1", "MT1X", "S100A8", "ALOX5", "ADA", "RPS27", "ABLIM3", "CD4", "TK1", "PAPOLA", "UHRF1", "MT2A", "SOD2", "GRIN2A", "S100A12", "CLIP1", "FTL", "JMJD6", "ALKBH3", "TRIM8", "DPP3", "ADAMTS3", "MT1M", "MT1G", "LIMS1", "SCO2", "PDXK", "ERAP2", "TES", "PTPN1", "CALR", "ACP5", "MT1A", "GALNT1", "B3GAT3", "SIRT2", "LAP3", "MT1E", "MT1F", "ANG", "ZNF207", "SKI", "ZNF90", "KPNB1",…
742	REGULATION OF CELL CYCLE PROCESS%GO%GO:0010564	3.42908e-06	1.52599e-05	0.627257	0.322482	2.09682	149	c("BMP7", "TGFA", "PIM1", "BCL6", "CDKN1A", "EDN1", "DCUN1D3", "DDX3X", "AXIN2", "CDK2", "PID1", "PSME2", "PSMD8", "AIF1", "PSMB8", "AURKA", "EPS8", "RBM38", "CDC7", "PTEN", "NEK6", "PSME4", "SMARCA4", "PSMA4", "CAV2", "PSME1", "PSMA6", "PDGFRB", "PSMB6", "CRLF3", "MED25", "PSMD14", "PSMA3", "ECT2", "AURKAIP1", "CDC25B", "FEM1B", "SIRT2", "ANAPC7", "PSMD2", "MLXIPL", "TIMELESS", "MAD2L2", "PSMA5"…
743	DNA BINDING%GO%GO:0003677	3.49102e-06	1.55146e-05	0.627257	0.257721	1.82568	344	c("BLM", "SERPINA3", "TSPYL2", "HEY2", "SREBF1", "BCL6", "PPARG", "MYC", "STAT3", "TFE3", "XRCC4", "HIF1A", "TCF21", "ARNTL", "RPS27", "ATF4", "DDX3X", "RORB", "SPI1", "NR4A3", "IRF1", "RUNX3", "PER1", "SNAI2", "MLX", "ZBTB16", "UHRF1", "TLR8", "SPHK1", "HSF2", "HNRNPAB", "WNT5A", "XBP1", "NPAS2", "TOP1MT", "NKX3-1", "RARA", "SOX11", "ELK4", "NKX2-5", "ESRRA", "IFI16", "NR1H2", "APEX1", "RASSF7",…
744	REGULATION OF CELL MORPHOGENESIS%GO%GO:0022604	3.57802e-06	1.58799e-05	0.627257	0.35252	2.1879	109	c("CCL2", "CCL11", "FGD2", "PARVB", "LRP8", "CSF1R", "CDC42EP4", "EPB41L3", "NGF", "ALDOA", "DAB2", "AXIN2", "ZNF703", "FGR", "NGFR", "ITGB2", "SH3KBP1", "PLXNB1", "CORO1A", "FES", "EPS8", "CDC42EP2", "PTEN", "YWHAH", "SSH2", "BCL9L", "BAIAP2", "CFL1", "NOTCH1", "ARHGDIA", "FGD3", "HCK", "CALR", "FMNL2", "RNF6", "MAD2L2", "WNT9B", "COL1A1", "RHOA", "LIF", "SEMA3A", "SLIT2", "PTPRO", "BMP2", "BMP5…
745	POST-TRANSLATIONAL PROTEIN MODIFICATION%REACTOME%REACT_22161.3	3.70952e-06	1.64414e-05	0.627257	0.357523	2.20588	104	c("GFPT2", "ALG3", "RPN1", "MCFD2", "ST3GAL1", "EDEM2", "GNPNAT1", "B4GALT6", "MGAT4A", "PIGA", "EIF5A", "PMM2", "RPN2", "ALG8", "PLAUR", "MAN1A1", "PIGH", "PIGT", "ALG5", "FURIN", "SEC24D", "B4GALT3", "DDOST", "MAN2A2", "GCNT1", "GMPPB", "MGAT1", "ST6GALNAC3", "GALNT10", "CALR", "PGM3", "GALNT1", "B4GALT1", "ST3GAL2", "GANAB", "VKORC1", "DAD1", "LMAN1", "ST3GAL4", "B4GALT5", "MGAT2", "PIGW", "ST…
746	RIBOSOMAL SCANNING AND START CODON RECOGNITION%REACTOME%REACT_931.2	3.75688e-06	1.6629e-05	0.627257	0.460292	2.40126	46	c("RPS27", "EIF4G1", "EIF5", "EIF4A1", "RPS19", "RPS5", "RPS18", "RPS17", "RPS3", "EIF3B", "RPS15A", "RPS2", "EIF1AX", "RPS28", "RPSA", "RPS10", "EIF3J", "RPS9", "RPS6", "RPS12", "EIF3I", "RPS15", "RPS16", "EIF2S1", "RPS7", "EIF3G", "RPS13", "EIF3D", "RPS26", "FAU", "EIF2S2", "RPS29", "EIF4H")
747	NEGATIVE REGULATION OF CELLULAR COMPONENT MOVEMENT%GO%GO:0051271	3.76466e-06	1.66315e-05	0.627257	0.449266	2.36576	48	c("CCL2", "HMOX1", "ACVRL1", "TGFBR3", "THBS1", "PTPRU", "CLIC4", "SERPINE1", "RNF41", "TIMP1", "NF2", "AIF1", "HYAL2", "ANGPT2", "IFITM1", "PTEN", "CHRD", "LRP1", "CITED2", "RAP2C", "DAG1", "MIA3", "ENG", "ADIPOQ", "BST2", "SLIT2", "PTPRO", "GTPBP4", "PTPRK", "BMP5", "CSNK2B", "NR2F2", "ADARB1", "VASH1", "HAS1", "ALOX15B", "TRIB1", "C13ORF15")
748	BIOLOGICAL ADHESION%GO%GO:0022610	3.76753e-06	1.66315e-05	0.627257	0.297654	1.99834	192	c("AZGP1", "CCL2", "BMP7", "ATP2A2", "CCL11", "S100A9", "SPOCK1", "SYK", "PDGFRA", "FERMT3", "LYVE1", "CD209", "S100A8", "CCR1", "CD58", "PLEK", "CCL21", "THBS1", "ITGA11", "ITGAM", "ITGA5", "NINJ2", "SELE", "STAB1", "PARVG", "PTPRU", "CD44", "ITGA2", "NCAM2", "SIGLEC1", "TYRO3", "ITGA7", "ITGB2", "CORO1A", "FERMT2", "ITGA3", "CADM3", "LILRB2", "FBLN5", "CDH19", "TEK", "NME1-NME2", "PARVA", "PPFI…
749	MODIFICATION-DEPENDENT MACROMOLECULE CATABOLIC PROCESS%GO%GO:0043632	3.77885e-06	1.66592e-05	0.627257	0.331361	2.12615	135	c("RNF144B", "CDK2", "PSME2", "HECTD1", "PSMD8", "UHRF1", "DNAJB9", "PSMB8", "DERL1", "AURKA", "UCHL3", "UBE2D3", "PSME4", "SEC61B", "ITCH", "FBXO6", "PSMA4", "PSME1", "PSMA6", "UBE3C", "HSP90B1", "TRIM13", "PSMB6", "UBE2J1", "PSMD14", "PSMA3", "TNFAIP1", "SIRT2", "ANAPC7", "RHBDD1", "PSMD2", "RNF6", "WFS1", "PSMA5", "PSMD12", "BIRC2", "FBXO5", "PSMD13", "ANAPC5", "PSME3", "VCP", "UBE2G1", "FBXO7…
750	ORGANOPHOSPHATE CATABOLIC PROCESS%GO%GO:0046434	3.85205e-06	1.69593e-05	0.610527	0.335779	2.12042	122	c("MYH6", "BLM", "PRDX6", "PDE4D", "RHOD", "GNL3", "IMPA2", "DDX3X", "EIF5", "RAB8B", "RAP1GAP", "ACLY", "EFTUD2", "PNPLA8", "GPX1", "PDE2A", "ABCD3", "PTEN", "RHOB", "ATL3", "GNL2", "NCF1", "MSH6", "HSP90AA1", "RHOF", "NUDT5", "RAB5A", "HINT1", "ATL2", "RAB9A", "RAB38", "GSPT1", "RAB4B", "PICK1", "PDE3A", "CDC42", "TDG", "MYO9B", "ARF3", "NT5E", "DNM2", "GCH1", "RAB5C", "RHOG", "CHD1L", "LIPG", …
751	TRANSLATION INITIATION COMPLEX FORMATION%REACTOME%REACT_1979.2	3.97155e-06	1.74621e-05	0.610527	0.45899	2.39447	46	c("RPS27", "EIF4G1", "EIF4A1", "RPS19", "RPS5", "RPS18", "RPS17", "RPS3", "EIF3B", "RPS15A", "RPS2", "EIF1AX", "RPS28", "RPSA", "RPS10", "EIF3J", "RPS9", "RPS6", "RPS12", "EIF3I", "RPS15", "RPS16", "EIF2S1", "RPS7", "EIF3G", "RPS13", "PABPC1", "EIF3D", "RPS26", "FAU", "EIF2S2", "RPS29", "EIF4H")
752	NEGATIVE REGULATION OF CELLULAR COMPONENT ORGANIZATION%GO%GO:0051129	4.0029e-06	1.75766e-05	0.610527	0.348071	2.1635	111	c("BMP7", "SPOCK1", "MID1IP1", "HEY2", "ACVRL1", "CCL21", "THBS1", "PRKCD", "DDX3X", "PPP2R5A", "SPI1", "PID1", "BCL2L1", "PICALM", "HSPA1B", "NGFR", "IRAK3", "CORO1A", "ADD1", "EPS8", "CST3", "NR1H2", "PTEN", "YWHAH", "LRSAM1", "KATNB1", "NR1H3", "FKBP4", "ARHGDIA", "TINF2", "AURKAIP1", "ANAPC7", "RNF6", "ERCC1", "MAD2L2", "SLN", "TWF1", "CDC42", "LILRB1", "RPL13A", "ADIPOQ", "FBXO5", "CAPG", "R…
753	NEGATIVE REGULATION OF UBIQUITIN-PROTEIN LIGASE ACTIVITY INVOLVED IN MITOTIC CELL CYCLE%GO%GO:0051436	4.02146e-06	1.76346e-05	0.610527	0.462297	2.34785	42	c("PSME2", "PSMD8", "PSMB8", "PSMA4", "PSME1", "PSMA6", "PSMB6", "PSMD14", "PSMA3", "ANAPC7", "PSMD2", "MAD2L2", "PSMA5", "PSMD12", "FBXO5", "PSMD13", "ANAPC5", "PSME3", "PSMB3", "PSMB5", "UBA52", "PSMC3", "PSMB9", "PSMB1", "PSMA7", "PSMD9", "PSMC4", "PSMD3", "CDC20", "PSMC5", "UBE2E1")
754	RESPONSE TO ELEVATED PLATELET CYTOSOLIC CA2+%REACTOME%REACT_1280.3	4.05149e-06	1.77427e-05	0.610527	0.444936	2.36833	51	c("CFD", "F13A1", "F5", "SRGN", "F8", "PLEK", "SERPINA1", "THBS1", "ALDOA", "SERPINE1", "WDR1", "TIMP1", "PSAP", "CD63", "CAP1", "SERPING1", "VWF", "FN1", "ITGB3", "CFL1", "TUBA4A", "CALU", "PFN1", "PPIA", "ABCC4", "CALM2", "A2M", "TMSB4X", "TF", "SPARC", "HSPA5", "STX4", "CALM3", "SERPINF2")
755	DIRECT P53 EFFECTORS%PATHWAY INTERACTION DATABASE NCI-NATURE CURATED DATA%DIRECT P53 EFFECTORS	4.07661e-06	1.78291e-05	0.610527	0.372319	2.2317	89	c("ATF3", "TGFA", "BCL6", "CDKN1A", "DDIT4", "RNF144B", "CCNG1", "DUSP1", "SERPINE1", "TNFRSF10A", "BCL2L1", "SPP1", "SNAI2", "HSPA1B", "STEAP3", "MMP2", "ZNF385A", "BID", "PYCARD", "TAP1", "GPX1", "PTEN", "CAV1", "MET", "BTG2", "CSE1L", "SMARCA4", "DUSP5", "BAK1", "CD82", "IRF5", "EDN2", "E2F3", "JUN", "PRMT1", "TNFRSF10D", "LIF", "DKK1", "COL18A1", "RFWD2", "NLRC4", "CARM1", "CASP1", "CTSD", "V…
756	BIOCARTA_MAPK_PATHWAY%MSIGDB_C2%BIOCARTA_MAPK_PATHWAY	4.08509e-06	1.78426e-05	0.610527	0.424472	2.31821	56	c("MAP3K8", "MYC", "MAP3K6", "RPS6KA2", "GRB2", "MAP2K1", "MAPK13", "NFKBIA", "RPS6KB2", "DAXX", "MAPK4", "RPS6KA1", "RIPK1", "PAK2", "MAPKAPK3", "MAP2K4", "NFKB1", "ELK1", "MAPK6", "CHUK", "MAP2K3", "JUN", "RELA", "FOS", "MKNK2", "SHC1", "MAP2K2", "TRADD", "MAPK7", "MAPK9", "MAX", "RAF1", "ARAF", "MAPKAPK2", "MAPK14", "MAPKAPK5", "RAC1", "IKBKB", "CREB1", "MAP4K1", "RPS6KA4", "MAPK3")
757	EXTRACELLULAR VESICULAR EXOSOME%GO%GO:0070062	4.14601e-06	1.80847e-05	0.610527	0.499237	2.45021	37	c("C3", "ENO1", "EMILIN1", "THBS1", "ANXA2", "ALDOA", "SDCBP", "TGFBI", "MVP", "TUBB", "CLTC", "ACTG1", "ANXA5", "STOM", "ANXA1", "CD274", "PCOLCE", "LGALS3BP", "SERPINA5", "VIM", "A2M", "ACTB", "NT5E", "HSPA8", "MSN", "PLAA", "MYH9", "FLNA")
758	NEGATIVE REGULATION OF PROTEIN UBIQUITINATION%GO%GO:0031397	4.1819e-06	1.82172e-05	0.610527	0.438137	2.37066	54	c("PSME2", "PSMD8", "PSMB8", "CAV1", "PSMA4", "PSME1", "PSMA6", "PSMB6", "PSMD14", "PSMA3", "ANAPC7", "PSMD2", "NXN", "MAD2L2", "N4BP1", "PSMA5", "PSMD12", "FBXO5", "PSMD13", "ANAPC5", "PSME3", "PSMB3", "GTPBP4", "PSMB5", "UBA52", "BAG5", "PSMC3", "UBXN1", "PSMB9", "PSMB1", "PSMA7", "PSMD9", "PSMC4", "PSMD3", "CDC20", "TNFAIP3", "PSMC5", "UBE2E1", "ARRB2", "VPS28")
759	CELLULAR CATION HOMEOSTASIS%GO%GO:0030003	4.20751e-06	1.83046e-05	0.610527	0.344144	2.16482	120	c("ATP2A2", "CCL11", "S1PR3", "S100A9", "PDGFRA", "SLC11A1", "S100A8", "CCR1", "MYC", "HMOX1", "EDN1", "C3AR1", "SCARA5", "TFRC", "CCL21", "SLC39A14", "AGTR1", "STEAP3", "GNA15", "SLC11A2", "MT2A", "CD55", "LPAR1", "ABCB6", "ATP6V1A", "GPR89B", "FTL", "SLC9A1", "CCL8", "CLCN3", "CAV1", "ITPR3", "LTF", "GPR89A", "ATP6V0A2", "HSP90B1", "HP", "DMPK", "JPH1", "CALR", "ATP6V0A1", "ATP6V1F", "EDN2", "R…
760	IMMUNE EFFECTOR PROCESS%GO%GO:0002252	4.22023e-06	1.83358e-05	0.610527	0.367963	2.21198	92	c("FCN3", "C3", "CFD", "SYK", "DOCK2", "SLC11A1", "C1R", "LCP1", "C1QC", "PLSCR1", "SAMHD1", "IL6R", "STXBP2", "C1S", "C7", "C1QA", "IRF1", "C1QB", "TUBB", "TLR8", "ANXA3", "C2", "EXOSC4", "CD74", "PYCARD", "IFI16", "SBNO2", "MSH6", "CEBPG", "TRIM5", "CTSH", "HCK", "C6", "FCN1", "FADD", "RELA", "LILRB1", "CFP", "BATF", "SLFN11", "IL6", "OAS1", "BST2", "BTN3A2")
761	NEGATIVE REGULATION OF CELL DIFFERENTIATION%GO%GO:0045596	4.27705e-06	1.85582e-05	0.610527	0.346937	2.16532	114	c("HOPX", "BMP7", "MEIS1", "MAFB", "OSR1", "HEY2", "PPARG", "MYC", "TLR4", "C1QC", "EFEMP1", "ABCG1", "AXIN2", "IRF1", "CDK6", "SNAI2", "ZBTB16", "NGFR", "WNT5A", "RARA", "SOX11", "NKX2-5", "NR1H2", "PTEN", "LILRB4", "NFKBIA", "YWHAH", "CAV1", "ITGB3", "CHRD", "GATA2", "NR1H3", "NOTCH1", "ARHGDIA", "CALR", "DLL1", "RNF6", "MAD2L2", "SKI", "LILRB1", "PRMT1", "ADIPOQ", "INHA", "IL6", "RHOA", "DKK1"…
762	REGULATION OF PROTEIN TRANSPORT%GO%GO:0051223	4.34223e-06	1.88163e-05	0.610527	0.34649	2.13385	103	c("BMP7", "SRGN", "CSF1R", "HCLS1", "TLR4", "LCP1", "RHBDF2", "TLR2", "NOD2", "DAB2", "AXIN2", "FGR", "BCL3", "IL10", "SNAI2", "NDFIP2", "SPHK1", "WNT5A", "HYAL2", "CABP1", "SYTL4", "PYCARD", "PDE2A", "RANGAP1", "NFKBIA", "DPH3", "UHMK1", "SFRP5", "CD274", "EXPH5", "TXN", "NR1H3", "DNAJC1", "ECT2", "NLRP3", "ACSL3", "CSK", "PPIA", "ANG", "LILRB1", "ADIPOQ", "IL6", "RHOA", "YWHAB", "TNFSF14", "GAP…
763	CELLULAR RESPONSE TO NITROGEN COMPOUND%GO%GO:1901699	4.4722e-06	1.93541e-05	0.610527	0.327607	2.09508	131	c("NAMPT", "SOCS3", "FGF7", "EIF4EBP1", "PPARG", "STAT3", "ADCY3", "AQP9", "PRKAR2A", "SOCS1", "EIF4G1", "MYO5A", "CDK2", "PRKRA", "PDK4", "GRB2", "GNG12", "ATP6V1A", "MAP2K1", "PDE2A", "CAB39L", "BAD", "EEF2K", "BAIAP2", "ATP6V0A2", "HSP90B1", "SH3BP4", "STRADB", "LYN", "ADCY1", "RPS6", "PTPN1", "ATP6V0A1", "ATP6V1F", "IRS2", "TCIRG1", "NRAS", "PRKAG1", "DOK1", "ATP6V0C", "PRKCI", "PDE3A", "SHC1…
764	SIGNALLING TO RAS%REACTOME%REACT_12033.2	4.501e-06	1.94533e-05	0.610527	0.582439	2.45793	22	c("IL6R", "NGF", "JAK1", "MAP2K1", "MAPK13", "MAPKAPK3", "NRAS", "SHC1", "RALB", "MAP2K2", "IL6", "YWHAB", "SOS1", "KRAS", "RAF1", "RALGDS", "MAPKAPK2", "RALA", "MAPK14", "NTRK1")
765	IMMUNE RESPONSE-REGULATING CELL SURFACE RECEPTOR SIGNALING PATHWAY%GO%GO:0002768	4.54044e-06	1.95262e-05	0.610527	0.408467	2.30318	65	c("SYK", "WAS", "NCKAP1L", "CD38", "BTK", "HLA-DRA", "FGR", "C5AR1", "CD4", "LILRB2", "HLA-DPA1", "MALT1", "RIPK2", "PTEN", "NFKBIA", "LCP2", "HLA-DRB4", "MNDA", "PAK2", "HLA-DPB1", "LYN", "NFKB1", "INPP5D", "STOML2", "MICB", "CSK", "PLEKHA1", "VASP", "CHUK", "RELA", "LILRB1", "FCGR1B", "HLA-DRB3", "UBA52", "RBCK1", "BCAR1", "LAT2", "TMEM189-UBE2V1", "FYB", "PRKCQ", "IKBKB", "RNF31", "PTPRC", "IK…
766	GLYCOSYLATION%GO%GO:0070085	4.54154e-06	1.95262e-05	0.610527	0.35061	2.14716	100	c("GFPT2", "ALG3", "UAP1", "RPN1", "MCFD2", "MAGT1", "ST3GAL1", "EDEM2", "GNPNAT1", "B4GALT6", "MGAT4A", "PMM2", "RPN2", "ALG8", "MAN1A1", "ALG5", "SEC24D", "ART4", "NPC1", "B4GALT3", "DDOST", "MAN2A2", "GCNT1", "GMPPB", "MGAT1", "UBE2J1", "GALNT10", "CALR", "PGM3", "GALNT1", "B4GALT1", "ST3GAL2", "SIRT2", "GANAB", "DAD1", "LMAN1", "ST3GAL4", "B4GALT5", "MGAT2", "VCP", "STT3A", "DPAGT1", "MAN2A1"…
767	MACROMOLECULE GLYCOSYLATION%GO%GO:0043413	4.54154e-06	1.95262e-05	0.610527	0.35061	2.14716	100	c("GFPT2", "ALG3", "UAP1", "RPN1", "MCFD2", "MAGT1", "ST3GAL1", "EDEM2", "GNPNAT1", "B4GALT6", "MGAT4A", "PMM2", "RPN2", "ALG8", "MAN1A1", "ALG5", "SEC24D", "ART4", "NPC1", "B4GALT3", "DDOST", "MAN2A2", "GCNT1", "GMPPB", "MGAT1", "UBE2J1", "GALNT10", "CALR", "PGM3", "GALNT1", "B4GALT1", "ST3GAL2", "SIRT2", "GANAB", "DAD1", "LMAN1", "ST3GAL4", "B4GALT5", "MGAT2", "VCP", "STT3A", "DPAGT1", "MAN2A1"…
768	PROTEIN GLYCOSYLATION%GO%GO:0006486	4.54154e-06	1.95262e-05	0.610527	0.35061	2.14716	100	c("GFPT2", "ALG3", "UAP1", "RPN1", "MCFD2", "MAGT1", "ST3GAL1", "EDEM2", "GNPNAT1", "B4GALT6", "MGAT4A", "PMM2", "RPN2", "ALG8", "MAN1A1", "ALG5", "SEC24D", "ART4", "NPC1", "B4GALT3", "DDOST", "MAN2A2", "GCNT1", "GMPPB", "MGAT1", "UBE2J1", "GALNT10", "CALR", "PGM3", "GALNT1", "B4GALT1", "ST3GAL2", "SIRT2", "GANAB", "DAD1", "LMAN1", "ST3GAL4", "B4GALT5", "MGAT2", "VCP", "STT3A", "DPAGT1", "MAN2A1"…
769	PROTEASOMAL UBIQUITIN-DEPENDENT PROTEIN CATABOLIC PROCESS%GO%GO:0043161	4.61087e-06	1.97986e-05	0.610527	0.35047	2.14631	100	c("CDK2", "PSME2", "PSMD8", "DNAJB9", "PSMB8", "DERL1", "AURKA", "UBE2D3", "PSME4", "SEC61B", "FBXO6", "PSMA4", "PSME1", "PSMA6", "HSP90B1", "TRIM13", "PSMB6", "UBE2J1", "PSMD14", "PSMA3", "TNFAIP1", "SIRT2", "ANAPC7", "RHBDD1", "PSMD2", "WFS1", "PSMA5", "PSMD12", "BIRC2", "FBXO5", "PSMD13", "ANAPC5", "PSME3", "VCP", "DERL2", "PTTG1", "PSMB3", "PSMB5", "UBA52", "RBCK1", "EDEM1", "RNF5", "OS9", "S…
770	NUCLEAR-TRANSCRIBED MRNA CATABOLIC PROCESS%GO%GO:0000956	4.62943e-06	1.98524e-05	0.610527	0.348695	2.1684	112	c("RPS27", "EIF4G1", "EIF4A1", "RPLP0", "RPS19", "EXOSC4", "RPL34", "TNKS1BP1", "RPL27A", "RPS5", "RPL29", "RPL18", "RPS18", "RPL24", "RPL13", "ETF1", "RPS17", "RPS3", "RPL35", "RPS15A", "RPS2", "LSM6", "MAGOH", "RPS28", "RPSA", "RPL41", "RPLP2", "RPL18A", "RPS10", "RPL12", "RPS9", "RPL36A", "RPS6", "RPL21", "RPL28", "RPL26", "RPS12", "GSPT1", "RPL37A", "RPL38", "RPL10A", "LSM7", "RPS15", "RPL17"…
771	CELLULAR RESPONSE TO LIPID%GO%GO:0071396	4.68123e-06	2.00485e-05	0.610527	0.407667	2.29867	65	c("CCL2", "BMP7", "TLR4", "TLR2", "IRAK1", "TESC", "SERPINE1", "LY96", "PID1", "AXL", "IL10", "PDK4", "WNT5A", "LILRB2", "NKX3-1", "AKR1C3", "RARA", "PYCARD", "TNFRSF1B", "ANXA1", "GSTP1", "PTGER2", "CD14", "WNT5B", "LYN", "NR1H3", "HCK", "NLRP3", "TNIP2", "LILRB1", "WNT9B", "MTDH", "ZNF35", "UBE2L3", "IL18", "IL1B", "PRKCE", "SHPK", "TNFSF4")
772	INTERFERON GAMMA SIGNALING%REACTOME%REACT_25078.1	4.83024e-06	2.06599e-05	0.610527	0.456683	2.38244	46	c("SOCS3", "IFI30", "IRF8", "PRKCD", "SOCS1", "HLA-DRA", "CD44", "IRF1", "B2M", "IFNGR1", "MT2A", "GBP1", "HLA-DPA1", "JAK1", "GBP2", "HLA-DRB4", "HLA-E", "HLA-DPB1", "IRF5", "PTPN1", "HLA-A", "GBP3", "HLA-B", "GBP5", "FCGR1A", "OAS1", "FCGR1B", "PTPN6", "HLA-DRB3", "IFNGR2", "PTAFR", "IRF7", "HLA-F", "IRF9", "OAS3", "HLA-DQA1", "HLA-C")
773	BIOCARTA_HIVNEF_PATHWAY%MSIGDB_C2%BIOCARTA_HIVNEF_PATHWAY	4.92658e-06	2.10447e-05	0.610527	0.520559	2.43439	31	c("BIRC3", "PRKCD", "TNFRSF1A", "ACTG1", "ARHGDIB", "BID", "LMNA", "TNFRSF1B", "NFKBIA", "DAXX", "RIPK1", "PAK2", "LMNB1", "NFKB1", "CASP7", "FADD", "CHUK", "RELA", "BIRC2", "TRADD", "LMNB2", "CFLAR", "DFFB", "MDM2")
774	RIBOSE PHOSPHATE METABOLIC PROCESS%GO%GO:0019693	4.96252e-06	2.11708e-05	0.610527	0.323415	2.06786	132	c("MYH6", "BLM", "PDE4D", "RHOD", "G6PD", "GNL3", "ALDOA", "DDX3X", "PAPSS2", "EIF5", "RAB8B", "RAP1GAP", "SLC25A13", "ACLY", "EFTUD2", "PDE2A", "ABCD3", "RHOB", "BAD", "ATL3", "GNL2", "NCF1", "MSH6", "HSP90AA1", "RHOF", "NADK", "RAB5A", "HINT1", "ADSS", "ATL2", "ADCY1", "RAB9A", "RAB38", "GSPT1", "STOML2", "RAB4B", "PICK1", "NPPC", "PDE3A", "CDC42", "MYO9B", "ARF3", "DNM2", "GCH1", "RAB5C", "RHO…
775	SIGNALING BY ERBB2%REACTOME%REACT_115755.4	4.99761e-06	2.12908e-05	0.610527	0.394473	2.29729	74	c("FGF7", "PDGFRA", "CDKN1A", "ADCY3", "CD86", "IL6R", "PRKAR2A", "PIK3R3", "PRKCD", "RNF41", "JAK1", "MAP2K1", "PTEN", "BAD", "YES1", "RPS6KB2", "ITPR3", "HSP90AA1", "PDGFRB", "ADCY1", "NR4A1", "IRS2", "NRAS", "CHUK", "SHC1", "CALM2", "ERBB2", "FOXO3", "MAP2K2", "IL6", "ADCY7", "YWHAB", "SOS1", "KRAS", "UBA52", "RAF1", "KLB", "VAV1", "PRKCE", "MAPKAP1", "CALM3", "MDM2", "PDE1B", "ADCY9", "TRIB3"…
776	S PHASE%REACTOME%REACT_899.6	5.00352e-06	2.12908e-05	0.610527	0.42517	2.34413	59	c("MYC", "CDKN1A", "CDK2", "PSME2", "PSMD8", "PSMB8", "POLA2", "PSME4", "PSMA4", "PSME1", "PSMA6", "PSMB6", "PSMD14", "PSMA3", "CDC25B", "PSMD2", "MCM8", "PSMA5", "PSMD12", "PSMD13", "PSME3", "PSMB3", "CDT1", "POLD4", "POLE2", "PSMB5", "UBA52", "MAX", "PSMC3", "PSMB9", "PSMB1", "POLD1", "PDS5A", "PSMA7", "PSMD9", "CKS1B", "PSMC4", "PSMD3", "CCNE1", "PSMC5", "MCM5", "LIG1", "FEN1", "SMC1A", "STAG1…
777	REGULATION OF ORGANELLE ORGANIZATION%GO%GO:0033043	5.2192e-06	2.21799e-05	0.610527	0.295385	1.97552	186	c("BMP7", "CCL11", "S100A9", "MID1IP1", "PDGFRA", "NCKAP1L", "TGFA", "S100A8", "MYC", "CSF1R", "HCLS1", "PLEK", "EDN1", "CCL21", "PRKCD", "ANXA2", "CLIC4", "SPI1", "AXIN2", "PID1", "BCL2L1", "NF2", "PLXNB1", "CORO1A", "BID", "ADD1", "FES", "AURKA", "EPS8", "CDC42EP2", "PYCARD", "MAP2K1", "TEK", "PTEN", "CLIP1", "BAD", "GPM6B", "SURF4", "TMED9", "NEK6", "ANXA1", "KATNB1", "SSH2", "ARPC4", "CAV2", …
778	CELLULAR RESPONSE TO INSULIN STIMULUS%GO%GO:0032869	5.23373e-06	2.22131e-05	0.610527	0.399156	2.30019	71	c("NAMPT", "FGF7", "EIF4EBP1", "PPARG", "EIF4G1", "MYO5A", "PDK4", "GRB2", "ATP6V1A", "MAP2K1", "CAB39L", "EEF2K", "BAIAP2", "ATP6V0A2", "STRADB", "RPS6", "ATP6V0A1", "ATP6V1F", "IRS2", "TCIRG1", "NRAS", "PRKAG1", "DOK1", "ATP6V0C", "PRKCI", "SHC1", "FOXO3", "ADIPOQ", "MAP2K2", "RHEB", "YWHAB", "SOS1", "KRAS", "CAB39", "ATP6V0B", "RAF1", "KLB", "BCAR1", "DENND4C", "AP3S1", "ATP6V0D1", "TRIB3", "F…
779	SIGNALING EVENTS MEDIATED BY PTP1B%PATHWAY INTERACTION DATABASE NCI-NATURE CURATED DATA%SIGNALING EVENTS MEDIATED BY PTP1B	5.2626e-06	2.2307e-05	0.610527	0.522487	2.47299	32	c("SOCS3", "STAT3", "CSF1R", "FGR", "GRB2", "FCGR2A", "YES1", "CAV1", "CSF1", "ITGB3", "TXN", "PDGFRB", "LYN", "HCK", "PTPN1", "CSK", "DOK1", "YBX1", "SHC1", "RHOA", "CAPN1", "BCAR1", "STAT5A", "LEP")
780	IMMUNE SYSTEM DEVELOPMENT%GO%GO:0002520	5.51223e-06	2.33052e-05	0.610527	0.329041	2.09465	127	c("NCKAP1L", "PPARG", "CSF1R", "HCLS1", "PLEK", "TGFBR3", "TCF21", "TGFBR2", "G6PD", "LRRC8A", "CD4", "AXL", "IL10", "ZBTB16", "WNT5A", "RPS19", "BATF3", "HIPK2", "CD74", "FZD5", "NKX2-5", "IFI16", "TPO", "TEK", "PDE2A", "ITGB1", "MSH6", "CEBPG", "ANXA1", "MT1G", "CSF1", "CLCF1", "CD164", "GATA2", "LYN", "HOXB4", "CITED2", "PGM3", "DLL1", "GLRX5", "CDC42", "LILRB1", "MKNK2", "BATF", "INHA", "MMP9…
781	PROTEASOMAL PROTEIN CATABOLIC PROCESS%GO%GO:0010498	5.51223e-06	2.33052e-05	0.610527	0.350655	2.15743	102	c("CDK2", "PSME2", "PSMD8", "DNAJB9", "PSMB8", "DERL1", "AURKA", "UBE2D3", "PSME4", "SEC61B", "FBXO6", "PSMA4", "PSME1", "PSMA6", "HSP90B1", "TRIM13", "PSMB6", "UBE2J1", "PSMD14", "PSMA3", "TNFAIP1", "SIRT2", "ANAPC7", "RHBDD1", "PSMD2", "WFS1", "PSMA5", "PSMD12", "BIRC2", "KEAP1", "FBXO5", "PSMD13", "ANAPC5", "PSME3", "VCP", "DERL2", "PTTG1", "PSMB3", "PSMB5", "UBA52", "RBCK1", "EDEM1", "RNF5", …
782	HEMOPOIESIS%GO%GO:0030097	5.66225e-06	2.39089e-05	0.610527	0.34845	2.16264	109	c("NCKAP1L", "PPARG", "CSF1R", "HCLS1", "PLEK", "TGFBR3", "TGFBR2", "G6PD", "LRRC8A", "CD4", "AXL", "IL10", "ZBTB16", "WNT5A", "RPS19", "BATF3", "HIPK2", "CD74", "FZD5", "NKX2-5", "IFI16", "TPO", "TEK", "PDE2A", "ITGB1", "CEBPG", "ANXA1", "MT1G", "CSF1", "CLCF1", "CD164", "GATA2", "LYN", "HOXB4", "PGM3", "DLL1", "GLRX5", "CDC42", "LILRB1", "MKNK2", "BATF", "INHA", "MMP9", "PRKX", "HIPK1", "THOC5"…
783	REGULATION OF NUCLEOTIDE CATABOLIC PROCESS%GO%GO:0030811	5.73172e-06	2.41405e-05	0.610527	0.357225	2.1781	98	c("MYH6", "CCL11", "FGD2", "NCKAP1L", "PLSCR1", "MYL4", "CCL21", "PREX1", "AXIN2", "TBC1D2", "RGS19", "RGS10", "UHRF1", "MYL3", "RAP1GAP", "RGS1", "PLXNB1", "MYBPC3", "ERRFI1", "CDC42EP2", "RGS2", "RANGAP1", "ADAP2", "IQGAP1", "TMED2", "OCRL", "ARHGAP4", "ARHGAP9", "SH3BP4", "FGD3", "DNAJC1", "ECT2", "AHSA1", "SIPA1", "JUN", "RP2", "ERBB2", "MYO9B", "RHOG", "TPM2", "RACGAP1", "SOS1", "ARHGAP26", …
784	REGULATION OF PURINE NUCLEOTIDE CATABOLIC PROCESS%GO%GO:0033121	5.73172e-06	2.41405e-05	0.610527	0.357225	2.1781	98	c("MYH6", "CCL11", "FGD2", "NCKAP1L", "PLSCR1", "MYL4", "CCL21", "PREX1", "AXIN2", "TBC1D2", "RGS19", "RGS10", "UHRF1", "MYL3", "RAP1GAP", "RGS1", "PLXNB1", "MYBPC3", "ERRFI1", "CDC42EP2", "RGS2", "RANGAP1", "ADAP2", "IQGAP1", "TMED2", "OCRL", "ARHGAP4", "ARHGAP9", "SH3BP4", "FGD3", "DNAJC1", "ECT2", "AHSA1", "SIPA1", "JUN", "RP2", "ERBB2", "MYO9B", "RHOG", "TPM2", "RACGAP1", "SOS1", "ARHGAP26", …
785	POSITIVE REGULATION OF APOPTOTIC PROCESS%GO%GO:0043065	5.78377e-06	2.43287e-05	0.610527	0.303721	1.99506	161	c("S100A9", "S100A8", "BCL6", "PPARG", "TLR2", "THBS1", "ATF4", "DCUN1D3", "DDX3X", "PTGIS", "IRF1", "TNFRSF10A", "RNF41", "ADAMTSL4", "RUNX3", "STK17B", "CASP4", "MTCH1", "IL10", "RPS6KA2", "EEF1E1", "WNT5A", "HYAL2", "BID", "HTATIP2", "EIF5A", "PAWR", "AKR1C3", "MAL", "PYCARD", "PTEN", "RHOB", "ITGB1", "BAD", "RPS3", "DAXX", "MNDA", "RIPK1", "BAK1", "LYN", "PDCD5", "ACVR1B", "IRF5", "RPS6", "EC…
786	ANTIGEN PROCESSING: UBIQUITINATION & PROTEASOME DEGRADATION%REACTOME%REACT_75842.1	6.09133e-06	2.55898e-05	0.610527	0.346369	2.16328	116	c("SOCS3", "SOCS1", "RNF144B", "PSME2", "RNF41", "PSMD8", "ZBTB16", "CBLB", "RNF19B", "UBE2F", "PSMB8", "UBE2D3", "TRIM37", "LRSAM1", "PSME4", "ATG7", "UBE2V2", "ITCH", "FBXO6", "PSMA4", "PSME1", "PSMA6", "UBE3C", "UBE2L6", "PSMB6", "UBE2J1", "RNF220", "PSMD14", "PSMA3", "UBE2Q1", "ANAPC7", "PSMD2", "RNF6", "PSMA5", "PSMD12", "TRIM21", "KEAP1", "PSMD13", "ANAPC5", "PSME3", "UBE2G1", "UBE2L3", "MG…
787	PEPTIDASE ACTIVITY, ACTING ON L-AMINO ACID PEPTIDES%GO%GO:0070011	6.13625e-06	2.57457e-05	0.610527	0.32553	2.0818	131	c("CORIN", "CTSC", "CFD", "CTSB", "ADAMTS9", "C1R", "ADAMTS5", "AGTPBP1", "PLAU", "C1S", "ZMPSTE24", "CTSS", "HM13", "CPA3", "ADAM11", "CNDP2", "MMP2", "ADAMTS7", "ECE2", "ASRGL1", "GGH", "USP12", "ST14", "USP2", "ENPEP", "MALT1", "LGMN", "CTSG", "ATG4D", "FURIN", "ADAM23", "DPP3", "TPSAB1", "ADAMTS3", "USP10", "LTF", "PSMA6", "ADAMTS1", "CTSH", "XPNPEP3", "PSMB6", "ERAP2", "CASP7", "PSMD14", "EC…
788	POSITIVE REGULATION OF EPITHELIAL CELL PROLIFERATION%GO%GO:0050679	6.22704e-06	2.60935e-05	0.610527	0.482618	2.39535	39	c("CCL11", "FGF7", "VASH2", "OSR1", "TGFA", "MYC", "HIF1A", "NOD2", "NME1", "ZNF703", "C5AR1", "WNT5A", "SOX11", "TEK", "NME1-NME2", "BAD", "ECM1", "ITGB3", "NME2", "NR4A1", "ANG", "ERBB2")
789	PROTEASOME COMPLEX%GO%GO:0000502	6.28066e-06	2.62848e-05	0.610527	0.499492	2.43036	35	c("PSME2", "PSMD8", "PSMB8", "PSMA4", "PSME1", "PSMA6", "ADRM1", "PSMB6", "PSMD14", "PSMA3", "PSMD2", "PSMA5", "PSMD12", "PSMD13", "PSME3", "VCP", "PSMB3", "PSMB5", "PSMC3", "UBXN1", "PSMB9", "PSMB1", "PSMA7", "PSMD9", "PSMC4", "PSMD3", "PSMC5", "HSPB1")
790	IL1%NETPATH%IL1	6.34008e-06	2.64999e-05	0.610527	0.456042	2.31608	42	c("STAT3", "IL1R1", "IRAK1", "IL1R2", "IRAK3", "MAP2K1", "NFKBIA", "NFKBIB", "IRAK4", "MYD88", "MAP2K4", "PPP6C", "NFKB1", "DOK1", "CHUK", "MAP2K3", "JUN", "PELI1", "RELA", "PLA2G4A", "MAP2K2", "ECSIT", "EIF2S1", "IRAK2", "MAPK9", "IL1B", "MAPK14", "SIRPA", "IKBKB", "IKBKG", "IL1RAP", "REL", "MAPK3")
791	IL6%NETPATH%IL6	6.35197e-06	2.65161e-05	0.610527	0.422999	2.33216	59	c("SOCS3", "EIF4EBP1", "STAT3", "BTK", "IL6R", "PRKCD", "FGR", "RPS6KA2", "GRB2", "FES", "JAK1", "MAP2K1", "BAD", "NFKBIA", "DAXX", "HSP90AA1", "MAP2K4", "LYN", "NFKB1", "HCK", "INPP5D", "IL6ST", "JUN", "FOS", "SHC1", "ERBB2", "FOXO3", "NCOA1", "MAP2K2", "IL6", "CEBPB", "ERBB3", "SOS1", "INPPL1", "VAV1", "STAT5A", "CD40", "MAPK14", "SIRPA", "RAC1", "HSPB1", "MAPK3", "HDAC1", "FOXO1")
792	S PHASE OF MITOTIC CELL CYCLE%GO%GO:0000084	6.47608e-06	2.7e-05	0.610527	0.428269	2.32078	55	c("CDKN1A", "CDK2", "PSME2", "PSMD8", "PSMB8", "POLA2", "PSME4", "PSMA4", "PSME1", "PSMA6", "LSM10", "PSMB6", "PSMD14", "PSMA3", "PSMD2", "MCM8", "PSMA5", "PSMD12", "PSMD13", "PSME3", "PSMB3", "CDT1", "POLD4", "ABL1", "POLE2", "PSMB5", "UBA52", "PSMC3", "PSMB9", "PSMB1", "POLD1", "PSMA7", "PSMD9", "CKS1B", "PSMC4", "PSMD3", "PSMC5", "MCM5", "LIG1", "FEN1")
793	CELLULAR AMIDE METABOLIC PROCESS%GO%GO:0043603	6.63291e-06	2.7619e-05	0.610527	0.439839	2.31612	48	c("NAMPT", "ARG2", "GGT5", "GLRX2", "ASS1", "G6PD", "ALOX5AP", "ASNS", "FASN", "CNDP2", "SGMS2", "GCLM", "ASRGL1", "GPX1", "VNN2", "FURIN", "GSTP1", "SLC5A6", "SLC25A15", "CTSH", "GGCT", "ECE1", "PANK2", "GSS", "PCSK1", "ARG1", "TMED10", "CLN3", "COASY", "STAT5A", "SGMS1", "FKBP1A", "ASL", "TAPBP")
794	SIGNAL TRANSDUCTION BY P53 CLASS MEDIATOR%GO%GO:0072331	6.9829e-06	2.90397e-05	0.610527	0.401839	2.26171	64	c("CDKN1A", "DDIT4", "CDK2", "PSME2", "PSMD8", "BCL3", "PSMB8", "RBM38", "HIPK2", "PYCARD", "IFI16", "PSME4", "USP10", "PSMA4", "PSME1", "PSMA6", "HINT1", "PSMB6", "PSMD14", "PSMA3", "PSMD2", "PSMA5", "PSMD12", "BATF", "PSMD13", "PSME3", "RFWD2", "PSMB3", "PSMB5", "UBA52", "PSMC3", "MDM2", "PSMB9", "PSMB1", "PSMA7", "PSMD9", "PSMC4", "PSMD3", "PSMC5", "MYBBP1A", "DDX5", "CASP2", "FOXM1", "TP53", …
795	PURINE NUCLEOTIDE METABOLIC PROCESS%GO%GO:0006163	7.03761e-06	2.92304e-05	0.610527	0.321811	2.07021	139	c("MYH6", "BLM", "PDE4D", "RHOD", "ADA", "GNL3", "ALDOA", "DDX3X", "PAPSS2", "EIF5", "RAB8B", "RAP1GAP", "SLC25A13", "ACLY", "EFTUD2", "GPX1", "PDE2A", "ABCD3", "RHOB", "BAD", "ATL3", "GNL2", "NCF1", "MSH6", "PPAT", "HSP90AA1", "RHOF", "NADK", "RAB5A", "HINT1", "ADSS", "ATL2", "ADCY1", "RAB9A", "RAB38", "GSPT1", "STOML2", "RAB4B", "PICK1", "NPPC", "PDE3A", "CDC42", "MYO9B", "ARF3", "OAS1", "NT5E"…
796	GASTRIN-CREB SIGNALLING PATHWAY VIA PKC AND MAPK%REACTOME%REACT_120966.2	7.07304e-06	2.93407e-05	0.610527	0.371844	2.23153	90	c("GRK5", "EDN1", "IL6R", "PIK3R3", "PRKCD", "AGTR1", "GPR4", "RGS19", "P2RY2", "RGS18", "GNA15", "RPS6KA2", "DGKD", "GNG12", "LPAR1", "JAK1", "MAP2K1", "TRIO", "RGS2", "EDNRB", "NMB", "PLCB2", "ANXA1", "ITPR3", "RPS6KA1", "F2RL3", "EDN2", "DAGLB", "GPR68", "PRKCH", "DGKA", "AGT", "NRAS", "GPR132", "MAP2K2", "IL6", "YWHAB", "MAPK7", "SOS1", "KRAS", "PROK2", "LTB4R", "RAF1", "PRKCE", "RASGRP2", "P…
797	VALIDATED TARGETS OF C-MYC TRANSCRIPTIONAL ACTIVATION%PATHWAY INTERACTION DATABASE NCI-NATURE CURATED DATA%VALIDATED TARGETS OF C-MYC TRANSCRIPTIONAL ACTIVATION	7.10541e-06	2.9438e-05	0.610527	0.436057	2.34044	52	c("SLC2A1", "LDHA", "ENO1", "PIM1", "BCAT1", "MYC", "SHMT1", "TFRC", "EIF4G1", "NME1", "FOSL1", "TK1", "EIF4A1", "NDUFAF2", "NME1-NME2", "HSP90AA1", "NME2", "E2F3", "MTDH", "MMP9", "RPL11", "EIF2S1", "BIRC5", "HUWE1", "PTMA", "MAX", "POLR3D", "BAX", "ACTL6A", "HMGA1", "RUVBL2", "TAF4B", "RUVBL1", "NCL", "DDX18", "SMAD3", "SNAI1", "TP53", "PMAIP1")
798	RAC1 SIGNALING PATHWAY%PATHWAY INTERACTION DATABASE NCI-NATURE CURATED DATA%RAC1 SIGNALING PATHWAY	7.43231e-06	3.0738e-05	0.610527	0.479045	2.39414	40	c("STAT3", "CYBB", "CYBA", "ARPC1B", "ARPC3", "IQGAP1", "PLCB2", "NCF1", "ARPC5", "ACTR2", "ARPC4", "BAIAP2", "ACTR3", "PAK2", "CFL1", "MAP2K4", "ARHGDIA", "NCKAP1", "ARPC2", "MAP2K3", "JUN", "NCF2", "RACGAP1", "MAPK9", "BCAR1", "STAT5A", "PIP5K1B", "PIP5K1C", "MAPK14", "RAC1")
799	ACTIVATION OF THE MRNA UPON BINDING OF THE CAP-BINDING COMPLEX AND EIFS, AND SUBSEQUENT BINDING TO 43S%REACTOME%REACT_1258.3	7.43781e-06	3.0738e-05	0.610527	0.465047	2.43583	47	c("EIF4EBP1", "RPS27", "EIF4G1", "EIF4A1", "RPS19", "RPS5", "RPS18", "RPS17", "RPS3", "EIF3B", "RPS15A", "RPS2", "EIF1AX", "RPS28", "RPSA", "RPS10", "EIF3J", "RPS9", "RPS6", "RPS12", "EIF3I", "RPS15", "RPS16", "EIF2S1", "RPS7", "EIF3G", "RPS13", "PABPC1", "EIF3D", "RPS26", "FAU", "EIF2S2", "RPS29", "EIF4H")
800	STRUCTURAL CONSTITUENT OF RIBOSOME%GO%GO:0003735	7.52352e-06	3.10533e-05	0.610527	0.380765	2.23354	80	c("RPLP0", "RPS19", "RPL34", "RPL27A", "RPS5", "RPL29", "RPL18", "RPS18", "RPL24", "RPL13", "RPS17", "RPS3", "RPL35", "MRPS24", "RPS15A", "MRPL41", "RPS2", "MRPS16", "RPSA", "RPL41", "RPLP2", "RPL18A", "RPL12", "RPL36A", "RPL21", "RPL28", "MRPL51", "RPL26", "RPL37A", "RPL38", "RPL10A", "RPL17", "RPL36", "RPL13A", "RPL4", "RPL27", "MRPS6", "RPL11", "RPL39", "RPL6", "UBA52", "RPL19", "RPL8", "RPL3"…
801	BIOCARTA_TOLL_PATHWAY%MSIGDB_C2%BIOCARTA_TOLL_PATHWAY	7.89161e-06	3.25319e-05	0.593325	0.556232	2.40535	24	c("TLR4", "TLR2", "IRAK1", "LY96", "NFKBIA", "CD14", "MYD88", "MAP2K4", "NFKB1", "ELK1", "TLR6", "CHUK", "MAP2K3", "JUN", "RELA", "FOS", "ECSIT")
802	PROTEIN TYROSINE KINASE ACTIVITY%GO%GO:0004713	7.98233e-06	3.28649e-05	0.593325	0.426101	2.30903	55	c("SYK", "PDGFRA", "CSF1R", "EFEMP1", "BTK", "FGR", "TYRO3", "FES", "MUSK", "FGFRL1", "JAK1", "TEK", "YES1", "MET", "PDGFRB", "LYN", "HCK", "FLT1", "PDGFRL", "EPHB4", "CSK", "TWF1", "SHC1", "ERBB2", "IGF2R", "ERBB3", "ABL1", "SCYL1", "TRIM27", "TNK2", "BCR", "ALK", "EFNA4", "EPHB2", "EPHA4", "EPHA2", "NTRK1", "MELK")
803	COMPLEMENT ACTIVATION%GO%GO:0006956	8.10529e-06	3.33144e-05	0.593325	0.629058	2.47739	17	c("FCN3", "C3", "CFD", "C1R", "C1QC", "C1S", "C7", "C1QA", "C1QB", "C2")
804	Prion diseases%KEGG%hsa05020	8.11167e-06	3.33144e-05	0.593325	0.586762	2.43959	21	c("C1QC", "C7", "C1QA", "C1QB", "NCAM2", "MAP2K1", "STIP1", "NOTCH1", "C6", "ELK1", "MAP2K2", "IL6", "PRKX", "HSPA5", "EGR1", "IL1B", "HSPA1A", "BAX")
805	NEGATIVE REGULATION OF KINASE ACTIVITY%GO%GO:0033673	8.2433e-06	3.38129e-05	0.593325	0.394881	2.27019	70	c("BMP7", "SOCS3", "PRKCD", "DUSP2", "SOCS1", "PPP2R5A", "DUSP1", "MVP", "DBNDD2", "IRAK3", "HYAL2", "ERRFI1", "PYCARD", "GMFG", "PTEN", "RGS2", "DNAJC3", "CAV1", "GSTP1", "GMFB", "DUSP5", "PAK2", "LYN", "DUSP7", "SNX6", "IRS2", "ZGPAT", "CDKN1C", "ADIPOQ", "ABL1", "ADAR", "GPS2", "TRIM27", "IL1B", "STK38", "PPM1F", "TRIB3", "WWTR1", "GBA", "DUSP19", "PRKAG2", "SPRED1", "NR2F2", "ADARB1", "PTPRC"…
806	S PHASE%GO%GO:0051320	8.49611e-06	3.47434e-05	0.593325	0.416576	2.27508	56	c("CDKN1A", "CDK2", "PSME2", "PSMD8", "PSMB8", "POLA2", "PSME4", "PSMA4", "PSME1", "PSMA6", "LSM10", "PSMB6", "PSMD14", "PSMA3", "PSMD2", "MCM8", "PSMA5", "PSMD12", "PSMD13", "PSME3", "PSMB3", "CDT1", "POLD4", "ABL1", "POLE2", "PSMB5", "UBA52", "PSMC3", "PSMB9", "PSMB1", "POLD1", "PSMA7", "PSMD9", "CKS1B", "PSMC4", "PSMD3", "PSMC5", "MCM5", "LIG1", "FEN1")
807	NEGATIVE REGULATION OF CELL MIGRATION%GO%GO:0030336	8.50171e-06	3.47434e-05	0.593325	0.457121	2.35982	45	c("CCL2", "HMOX1", "ACVRL1", "THBS1", "PTPRU", "CLIC4", "SERPINE1", "RNF41", "TIMP1", "NF2", "AIF1", "HYAL2", "ANGPT2", "IFITM1", "PTEN", "CHRD", "LRP1", "CITED2", "RAP2C", "DAG1", "MIA3", "ENG", "ADIPOQ", "BST2", "SLIT2", "GTPBP4", "PTPRK", "BMP5", "CSNK2B", "NR2F2", "ADARB1", "VASH1", "HAS1", "ALOX15B", "TRIB1", "C13ORF15")
808	NEGATIVE REGULATION OF CELL MOTILITY%GO%GO:2000146	8.50171e-06	3.47434e-05	0.593325	0.457121	2.35982	45	c("CCL2", "HMOX1", "ACVRL1", "THBS1", "PTPRU", "CLIC4", "SERPINE1", "RNF41", "TIMP1", "NF2", "AIF1", "HYAL2", "ANGPT2", "IFITM1", "PTEN", "CHRD", "LRP1", "CITED2", "RAP2C", "DAG1", "MIA3", "ENG", "ADIPOQ", "BST2", "SLIT2", "GTPBP4", "PTPRK", "BMP5", "CSNK2B", "NR2F2", "ADARB1", "VASH1", "HAS1", "ALOX15B", "TRIB1", "C13ORF15")
809	ANGIOPOIETIN RECEPTOR TIE2-MEDIATED SIGNALING%PATHWAY INTERACTION DATABASE NCI-NATURE CURATED DATA%ANGIOPOIETIN RECEPTOR TIE2-MEDIATED SIGNALING	8.60677e-06	3.51293e-05	0.593325	0.52587	2.38795	28	c("GRB14", "CDKN1A", "ITGA5", "AGTR1", "MMP2", "GRB2", "ANGPT2", "FES", "TEK", "DOK2", "ITGB1", "FN1", "ANGPT1", "NFKB1", "ELK1", "ELF1", "RELA", "SHC1", "STAT5A", "MAPK14", "RAC1", "NOS3", "ETS1", "MAPK3", "FOXO1")
810	Glutathione metabolism%KEGG%hsa00480	8.67293e-06	3.53556e-05	0.593325	0.554482	2.39778	24	c("MGST1", "GGT5", "ANPEP", "G6PD", "GPX3", "IDH1", "GCLM", "PGD", "IDH2", "GPX1", "OPLAH", "GSTP1", "GGCT", "GPX4", "LAP3", "GSS")
811	GUANYL NUCLEOTIDE BINDING%GO%GO:0019001	8.71044e-06	3.5421e-05	0.593325	0.432808	2.2936	49	c("TUBA3D", "GNL3", "NME1", "RAB8B", "GNA15", "PDE2A", "RHOB", "RAB8A", "GNL2", "NCF1", "PDE11A", "RAB5A", "ADSS", "RAB27A", "RAB9A", "RAP1B", "TUBA3C", "RAB38", "RALB", "RHEB", "DNM2", "GCH1", "RAB5C", "TPX2", "GTPBP4", "RAN", "RAB35", "LSG1", "RAB17", "ERAL1", "NMUR2", "MX2", "RAC1", "GNL1")
812	GUANYL RIBONUCLEOTIDE BINDING%GO%GO:0032561	8.71044e-06	3.5421e-05	0.593325	0.432808	2.2936	49	c("TUBA3D", "GNL3", "NME1", "RAB8B", "GNA15", "PDE2A", "RHOB", "RAB8A", "GNL2", "NCF1", "PDE11A", "RAB5A", "ADSS", "RAB27A", "RAB9A", "RAP1B", "TUBA3C", "RAB38", "RALB", "RHEB", "DNM2", "GCH1", "RAB5C", "TPX2", "GTPBP4", "RAN", "RAB35", "LSG1", "RAB17", "ERAL1", "NMUR2", "MX2", "RAC1", "GNL1")
813	CXCR4-MEDIATED SIGNALING EVENTS%PATHWAY INTERACTION DATABASE NCI-NATURE CURATED DATA%CXCR4-MEDIATED SIGNALING EVENTS	8.72851e-06	3.54509e-05	0.593325	0.450335	2.38617	50	c("STAT3", "HLA-DRA", "GNAO1", "FGR", "CD4", "RGS1", "GNA13", "RHOB", "BAD", "YES1", "PLCB2", "ITCH", "CFL1", "LYN", "HCK", "GRK6", "RAP1B", "CSK", "CDC42", "RALB", "GNAI2", "CXCL12", "RHOA", "STAT2", "MMP9", "PTPN6", "BCAR1", "VAV1", "STAT5A", "MAPKAP1", "RHOC", "RAC1", "GNAI3", "HGS", "PTPRC", "ARRB2", "GNB1", "SSH1", "FOXO1")
814	VITAMIN METABOLIC PROCESS%GO%GO:0006766	8.79236e-06	3.56663e-05	0.593325	0.45653	2.35676	45	c("NAMPT", "SLC2A1", "SLC2A3", "SHMT1", "TCN2", "FASN", "FLAD1", "PSAT1", "CYP2R1", "MOCS1", "LGMN", "VNN2", "MTHFR", "MOCOS", "RBP1", "SLC5A6", "RXRA", "NADK", "PDXK", "QPRT", "UBIAD1", "TPK1", "ACP5")
815	NOD-like receptor signaling pathway%KEGG%hsa04621	8.94186e-06	3.62282e-05	0.593325	0.483213	2.38332	38	c("CCL2", "BIRC3", "NOD2", "CXCL1", "PSTPIP1", "CXCL2", "PYCARD", "RIPK2", "MAPK13", "NFKBIA", "NFKBIB", "HSP90AA1", "HSP90B1", "CARD6", "NFKB1", "NLRP3", "CHUK", "RELA", "BIRC2", "IL6", "NLRC4", "MAPK9", "CASP1", "IL18", "MEFV", "IL1B", "MAPK14", "TNFAIP3", "IKBKB", "IKBKG", "MAPK3", "IL8", "CARD8")
[truncated: 2,487 more rows]

## Sheet: Massey
	pathway	pval	padj	log2err	ES	NES	size	leadingEdge
[truncated: 2,938 more rows]

## Sheet: Colley
	pathway	pval	padj	log2err	ES	NES	size	leadingEdge
[truncated: 2,798 more rows]

## Sheet: Keener
	pathway	pval	padj	log2err	ES	NES	size	leadingEdge
[truncated: 2,987 more rows]

## Sheet: Elo
	pathway	pval	padj	log2err	ES	NES	size	leadingEdge
[truncated: 2,828 more rows]

## Sheet: PageRank
	pathway	pval	padj	log2err	ES	NES	size	leadingEdge
[truncated: 3,591 more rows]

## Sheet: BiPageRank
	pathway	pval	padj	log2err	ES	NES	size	leadingEdge
[truncated: 3,179 more rows]
