# Supplementary material for: GeneCompete: an integrative tool of a novel union algorithm with various ranking techniques for multiple gene expression data
Source: PeerJ Comput Sci. 2023 Nov 15;9:e1686. doi: 10.7717/peerj-cs.1686 (PMC10703088; doi:10.7717/peerj-cs.1686)
Supplement: Supplemental Information 17 [file peerj-cs-09-1686-s017.xlsx]

## Sheet: DOWN-regulation
		AUC				AUPRn
		Intersect		Union		Intersect		Union
	method	Average	SD	Average	SD	Average	SD	Average	SD
1	Classic	0.881445	0.042968	0.826014	0.0832615	3.05376	0.175396	2.79034	0.555481
2	Count	0.938098	0.0332615	0.887374	0.0958478	6.24257	3.12861	7.62268	5.05968
3	Avg_logFC	0.840605	0.0712926	0.896497	0.0864395	5.85819	8.00854	10.334	11.3433
4	Win-loss	0.959281	0.0310521	0.909041	0.108619	12.8812	20.005	14.855	17.7367
5	Massey	0.959291	0.0310549	0.909273	0.067253	12.8818	20.0048	15.6815	18.9369
6	Colley	0.959274	0.0310539	0.904571	0.0592879	12.8813	20.0049	11.0162	12.3766
7	Keener	0.960173	0.0306555	0.916077	0.066649	13.1197	20.5877	16.1376	19.9408
8	Elo	0.955439	0.0313936	0.905373	0.0616199	7.36434	5.25346	14.13	17.5788
9	Markov	0.961287	0.0294119	0.784131	0.168819	13.0644	20.4678	2.62054	0.947263
10	PageRank	0.960714	0.0295268	0.916808	0.092937	13.9943	23.1884	17.065	21.4028
11	BiPageRank	0.960113	0.0300528	0.907317	0.0671051	14.01	23.2369	17.0073	21.5786

## Sheet: UP-regulation
		AUC				AUPRn
		Intersect		Union		Intersect		Union
	method	Average	SD	Average	SD	Average	SD	Average	SD
1	Classic	0.823078	0.0749402	0.809916	0.0794263	2.40956	0.342217	2.5971	0.549543
2	Count	0.912715	0.0965031	0.874796	0.0929232	8.56686	10.6752	11.0617	12.5533
3	Avg_logFC	0.930344	0.0642979	0.901268	0.0680116	56.5326	144.861	17.5952	26.8576
4	Win-loss	0.941401	0.0631049	0.910855	0.0739504	56.9703	144.689	26.4693	40.8146
5	Massey	0.941409	0.0631072	0.899702	0.0809728	56.9715	144.688	27.5756	43.0936
6	Colley	0.941387	0.0630964	0.896486	0.068106	56.9706	144.689	14.8407	20.6226
7	Keener	0.942994	0.0649707	0.904059	0.0760209	56.9884	144.683	28.8715	45.8034
8	Elo	0.940081	0.0670304	0.899074	0.0671684	30.9416	71.3893	22.2301	34.8153
9	Markov	0.941658	0.0672978	0.682319	0.0850762	56.9753	144.689	1.60931	0.565057
10	PageRank	0.940759	0.0683139	0.911894	0.0730818	30.9817	71.377	30.1381	48.8893
11	BiPageRank	0.940493	0.0662072	0.900226	0.0781752	30.9866	71.3747	30.0951	48.8816
